# Supplementary material for: Comparative analysis of 105 datasets across species and tissues reveals higher variability in transcriptomic responses to THC than CBD
Source: Research Square preprint supplement (doi:10.21203/rs.3.rs-6857614/v1), 2025-06-13
Supplement: Supplementary file 1 [file 07bc591ce693bab98ea71291.xlsx]

## Sheet: Down DEG
Name	Score
CD72	0.0185185
GRM8	0.037037
