# Supplementary material for: Comparative analysis of 105 datasets across species and tissues reveals higher variability in transcriptomic responses to THC than CBD
Source: Research Square preprint supplement (doi:10.21203/rs.3.rs-6857614/v1), 2025-06-13
Supplement: Supplementary file 2 [file 2347da97116dab3c838eadcf.xlsx]

## Sheet: DEG count
ID	Total	Up	Down
CBD_GSE131565	8916	4384	4532
CBD_GSE168797_Mock_CBD	7144	3578	3566
CBD_GSE179661_HepG2	6749	3501	3248
CBD_GSE168797_SARS_CBD	6600	3168	3432
CBD_GSE179661_MHCC97H	6259	3395	2864
CBD_GSE151512_24h	5368	2672	2696
CBD_GSE235310_LPS	5098	2705	2393
CBD_GSE274859_LPS_24h	4501	2147	2354
CBD_GSE235310_Veh	3541	1877	1664
CBD_GSE272113_CBD	3269	1707	1562
CBD_GSE272113_sCBD	2745	1367	1378
CBD_GSE201508_cGAMP	2545	1322	1223
CBD_GSE151512_12h	2320	1104	1216
CBD_GSE168797_SARS_CBDV	1860	561	1299
CBD_GSE261716_CBD20_28d	1629	811	818
CBD_GSE151512_6h	1528	641	887
CBD_GSE152088	1175	613	562
THC_GSE273695_Brain_Male_LPS	1001	683	318
CBD_GSE261716_CBD0.2_2d	964	604	360
THC_GSE189821_Female_Amy	956	599	357
CBD_GSE201508_enthanol	718	438	280
CBD_GSE168797_Mock_CBDV	694	375	319
CBD_GSE261716_CBD20_2d	663	420	243
CBD_GSE261716_CBD0.2_28d	540	283	257
CBD_GSE266113_WT	466	282	184
CBD_GSE274435_DMSO_24h	409	186	223
CBD_GSE261716_CBD10_28d	373	119	254
CBD_GSE232624_EtOH0.75_CBD0.75_6h	318	137	181
CBD_GSE232624_Veh_CBD3_12h	307	69	238
CBD_GSE151512_3h	296	125	171
CBD_GSE232624_EtOH0.25_CBD0.75_12h	249	182	67
CBD_GSE70689_CBD_NoLPS	187	128	59
THC_GSE242892_16p11dup	178	114	64
CBD_GSE70689_CBD_wLPS	168	109	59
THC_GSE116813_vehicle	155	83	72
CBD_GSE232624_Veh_CBD0.75_12h	152	15	137
CBD_GSE232624_EtOH0.75_CBD0.75_12h	150	83	67
CBD_GSE274435_EtOH_24h	140	54	86
THC_GSE189821_Male_Nac	99	69	30
THC_GSE242892_WT	89	62	27
CBD_GSE266113_mutNdufs4	88	58	30
CBD_GSE232624_Veh_CBD3_6h	75	40	35
CBD_GSE270378_CBD0.75_24h	72	43	29
THC_GSE189821_Female_DMS	65	11	54
CBD_GSE275998_CDB20	63	33	30
THC_GSE213734_vehicle	54	35	19
THC_GSE181487	44	10	34
THC_GSE244644_FetalAorta	41	28	13
CBD_GSE274435_DMSO_4h	40	30	10
CBD_GSE232624_EtOH0.25_CBD0.75_6h	35	11	24
CBD_GSE270378_CBD1.5_24h	31	12	19
THC_GSE273695_Blood_Female_LPS	28	28	0
THC_GSE273695_Brain_Female_LPS	26	23	3
CBD_GSE270378_CBD0.325_24h	25	12	13
CBD_GSE275998_CDB10	25	9	16
THC_GSE235969_Male_Young_5wk	24	0	24
THC_GSE273695_Brain_Male_Saline	23	16	7
CBD_GSE232624_Veh_CBD0.75_6h	21	7	14
CBD_GSE261716_CBD10_2d	21	11	10
CBD_GSE270378_CBD3_6h	21	11	10
THC_GSE235969_Female_Old_5d	21	15	6
THC_GSE273695_Blood_Male_Saline	20	12	8
CBD_GSE270378_CBD0.75_6h	16	11	5
CBD_GSE270378_CBD0.325_6h	14	10	4
THC_GSE189821_Female_VTA	12	3	9
THC_GSE244644_UmbilicalVein	11	4	7
CBD_GSE270378_CBD1.5_6h	10	6	4
CBD_GSE274435_EtOH_4h	8	7	1
CBD_GSE274859_LPS_4h	7	5	2
THC_GSE273695_Blood_Male_LPS	7	3	4
THC_GSE116813_DISC1	6	0	6
THC_GSE158188_Female	5	0	5
THC_GSE158188_Male	5	1	4
THC_GSE189821_Female_PFC	5	1	4
CBD_GSE266113_mutCox15	4	2	2
THC_GSE198578	4	3	1
THC_GSE213734_LPS	4	3	1
THC_GSE235969_Female_Old_5wk	4	0	4
CBD_GSE270378_CBD3_24h	3	1	2
THC_GSE216112	3	1	2
THC_GSE189821_Male_Amy	2	1	1
THC_GSE240225_THC	2	1	1
THC_GSE189821_Male_DMS	1	1	0
THC_GSE189821_Male_VTA	1	1	0
THC_GSE226955_ESC	1	1	0
THC_GSE273695_Blood_Female_Saline	1	1	0
THC_GSE273695_Brain_Female_Saline	1	1	0
THC_GSE70689_THC_NoLPS	1	1	0
CBD_GSE242079_CBD3	0	0	0
CBD_GSE242079_CBD30	0	0	0
CBD_GSE262437_AsympCO	0	0	0
CBD_GSE262437_SympCO	0	0	0
CBD_GSE57571	0	0	0
THC_GSE121439	0	0	0
THC_GSE150723	0	0	0
THC_GSE189821_Female_Nac	0	0	0
THC_GSE189821_Male_PFC	0	0	0
THC_GSE207518	0	0	0
THC_GSE226955_EpiLC	0	0	0
THC_GSE226955_PGCLC	0	0	0
THC_GSE240225_THC-COOH	0	0	0
THC_GSE244644_UmbilicalArtery	0	0	0
THC_GSE57823_Old	0	0	0
THC_GSE57823_Young	0	0	0
THC_GSE70689_THC_wLPS	0	0	0
