# Supplementary material for: Comparative analysis of 105 datasets across species and tissues reveals higher variability in transcriptomic responses to THC than CBD
Source: Research Square preprint supplement (doi:10.21203/rs.3.rs-6857614/v1), 2025-06-13
Supplement: Supplementary file 3 [file 271c7f7279426faddd91d20a.xlsx]

## Sheet: Up DEG
Name	Score
ITPRID1	0.00166945
CCN2	0.0033389
MEI1	0.00500835
IGF2BP2	0.0066778
EFCAB13	0.00834725
SMOC2	0.0100167
ADRA2B	0.0116861
WDFY4	0.0133556
KIAA0040	0.0166945
BMP3	0.0183639
ADORA2A	0.0200334
FRRS1	0.0217028
ACVR1C	0.0233723
OVOL2	0.0250417
ESRP2	0.0267112
CCDC3	0.0283806
RSPO2	0.0300501
NPSR1	0.0317195
NPTX2	0.033389
TBR1	0.0350584
HGF	0.0367279
ASB11	0.0383973
HKDC1	0.0400668
TFAP2D	0.0417362
EPOP	0.0434057
MIS18A	0.0434783
VEGFD	0.0450751
IDO1	0.0467446
SCUBE1	0.048414

## Sheet: Down DEG
Name	Score
TEX14	0.00280112
CYP19A1	0.00560224
FEZF1	0.00840336
SIM1	0.0112045
MET	0.0140056
FMO2	0.0168067
LHX5	0.0196078
CARTPT	0.022409
PPP1R17	0.0252101
GSTP1	0.0280112
CACNA1B	0.0294118
SHISAL2B	0.0308123
E2F7	0.0336134
GPR50	0.0364146
SLC4A5	0.0416667
RHCG	0.0420168
CDHR2	0.0448179
GPX3	0.047619
