# Supplementary material for: Comparative analysis of 105 datasets across species and tissues reveals higher variability in transcriptomic responses to THC than CBD
Source: Research Square preprint supplement (doi:10.21203/rs.3.rs-6857614/v1), 2025-06-13
Supplement: Supplementary file 4 [file 57c28266df4f5a6e073993df.xlsx]

## Sheet: CBD upregulated pathways
Term	Freq	Source
Metabolic pathways Homo sapiens hsa01100	17	DEG_GSE151512_12h; DEG_GSE151512_24h; DEG_GSE151512_6h; DEG_GSE168797_Mock_CBDV; DEG_GSE168797_SARS_CBD; DEG_GSE168797_SARS_CBDV; DEG_GSE201508_cGAMP; DEG_GSE201508_enthanol; DEG_GSE232624_EtOH0.75_CBD0.75_6h; DEG_GSE235310_Veh; DEG_GSE261716_CBD0.2_28d; DEG_GSE261716_CBD0.2_2d; DEG_GSE261716_CBD10_28d; DEG_GSE261716_CBD10_2d; DEG_GSE261716_CBD20_28d; DEG_GSE261716_CBD20_2d; DEG_GSE272113_sCBD
Protein processing in endoplasmic reticulum Homo sapiens hsa04141	13	DEG_GSE131565; DEG_GSE151512_6h; DEG_GSE168797_Mock_CBD; DEG_GSE168797_SARS_CBD; DEG_GSE168797_SARS_CBDV; DEG_GSE179661_HepG2; DEG_GSE179661_MHCC97H; DEG_GSE201508_cGAMP; DEG_GSE201508_enthanol; DEG_GSE272113_sCBD; DEG_GSE274435_DMSO_24h; DEG_GSE274435_DMSO_4h; DEG_GSE274435_EtOH_24h
Mineral absorption Homo sapiens hsa04978	11	DEG_GSE131565; DEG_GSE151512_12h; DEG_GSE151512_24h; DEG_GSE151512_3h; DEG_GSE151512_6h; DEG_GSE179661_HepG2; DEG_GSE179661_MHCC97H; DEG_GSE201508_cGAMP; DEG_GSE201508_enthanol; DEG_GSE235310_Veh; DEG_GSE272113_sCBD
response to endoplasmic reticulum stress (GO:0034976)	10	DEG_GSE131565; DEG_GSE151512_6h; DEG_GSE168797_Mock_CBD; DEG_GSE168797_SARS_CBD; DEG_GSE179661_HepG2; DEG_GSE179661_MHCC97H; DEG_GSE201508_cGAMP; DEG_GSE201508_enthanol; DEG_GSE272113_sCBD; DEG_GSE274435_DMSO_24h
translational initiation (GO:0006413)	10	DEG_GSE151512_24h; DEG_GSE151512_6h; DEG_GSE152088; DEG_GSE168797_SARS_CBD; DEG_GSE179661_HepG2; DEG_GSE179661_MHCC97H; DEG_GSE201508_enthanol; DEG_GSE261716_CBD0.2_2d; DEG_GSE261716_CBD20_28d; DEG_GSE261716_CBD20_2d
cellular response to zinc ion (GO:0071294)	9	DEG_GSE131565; DEG_GSE151512_12h; DEG_GSE151512_3h; DEG_GSE151512_6h; DEG_GSE179661_HepG2; DEG_GSE179661_MHCC97H; DEG_GSE201508_cGAMP; DEG_GSE201508_enthanol; DEG_GSE235310_Veh
cholesterol biosynthetic process (GO:0006695)	9	DEG_GSE151512_12h; DEG_GSE151512_24h; DEG_GSE151512_6h; DEG_GSE168797_Mock_CBDV; DEG_GSE168797_SARS_CBD; DEG_GSE168797_SARS_CBDV; DEG_GSE201508_cGAMP; DEG_GSE201508_enthanol; DEG_GSE272113_sCBD
intrinsic apoptotic signaling pathway in response to endoplasmic reticulum stress (GO:0070059)	9	DEG_GSE131565; DEG_GSE151512_12h; DEG_GSE151512_24h; DEG_GSE151512_6h; DEG_GSE168797_Mock_CBD; DEG_GSE179661_HepG2; DEG_GSE179661_MHCC97H; DEG_GSE201508_cGAMP; DEG_GSE272113_sCBD
negative regulation of growth (GO:0045926)	9	DEG_GSE131565; DEG_GSE151512_12h; DEG_GSE151512_3h; DEG_GSE151512_6h; DEG_GSE179661_HepG2; DEG_GSE179661_MHCC97H; DEG_GSE201508_cGAMP; DEG_GSE201508_enthanol; DEG_GSE235310_Veh
neutrophil degranulation (GO:0043312)	9	DEG_GSE131565; DEG_GSE168797_Mock_CBD; DEG_GSE168797_SARS_CBD; DEG_GSE168797_SARS_CBDV; DEG_GSE201508_cGAMP; DEG_GSE201508_enthanol; DEG_GSE235310_Veh; DEG_GSE261716_CBD20_28d; DEG_GSE272113_sCBD
nuclear-transcribed mRNA catabolic process, nonsense-mediated decay (GO:0000184)	9	DEG_GSE151512_24h; DEG_GSE152088; DEG_GSE168797_SARS_CBD; DEG_GSE179661_HepG2; DEG_GSE179661_MHCC97H; DEG_GSE201508_enthanol; DEG_GSE261716_CBD0.2_2d; DEG_GSE261716_CBD20_28d; DEG_GSE261716_CBD20_2d
Ribosome Homo sapiens hsa03010	9	DEG_GSE151512_24h; DEG_GSE152088; DEG_GSE168797_SARS_CBD; DEG_GSE179661_HepG2; DEG_GSE179661_MHCC97H; DEG_GSE201508_enthanol; DEG_GSE261716_CBD0.2_2d; DEG_GSE261716_CBD20_28d; DEG_GSE261716_CBD20_2d
rRNA processing (GO:0006364)	9	DEG_GSE151512_24h; DEG_GSE152088; DEG_GSE168797_SARS_CBD; DEG_GSE179661_HepG2; DEG_GSE179661_MHCC97H; DEG_GSE201508_enthanol; DEG_GSE261716_CBD0.2_2d; DEG_GSE261716_CBD20_28d; DEG_GSE261716_CBD20_2d
SRP-dependent cotranslational protein targeting to membrane (GO:0006614)	9	DEG_GSE151512_24h; DEG_GSE152088; DEG_GSE168797_SARS_CBD; DEG_GSE179661_HepG2; DEG_GSE179661_MHCC97H; DEG_GSE201508_enthanol; DEG_GSE261716_CBD0.2_2d; DEG_GSE261716_CBD20_28d; DEG_GSE261716_CBD20_2d
translation (GO:0006412)	9	DEG_GSE151512_24h; DEG_GSE152088; DEG_GSE168797_SARS_CBD; DEG_GSE179661_HepG2; DEG_GSE179661_MHCC97H; DEG_GSE201508_enthanol; DEG_GSE261716_CBD0.2_2d; DEG_GSE261716_CBD20_28d; DEG_GSE261716_CBD20_2d
viral transcription (GO:0019083)	9	DEG_GSE151512_24h; DEG_GSE152088; DEG_GSE168797_SARS_CBD; DEG_GSE179661_HepG2; DEG_GSE179661_MHCC97H; DEG_GSE201508_enthanol; DEG_GSE261716_CBD0.2_2d; DEG_GSE261716_CBD20_28d; DEG_GSE261716_CBD20_2d
IRE1-mediated unfolded protein response (GO:0036498)	8	DEG_GSE131565; DEG_GSE168797_Mock_CBD; DEG_GSE168797_SARS_CBD; DEG_GSE179661_HepG2; DEG_GSE179661_MHCC97H; DEG_GSE201508_cGAMP; DEG_GSE201508_enthanol; DEG_GSE272113_sCBD
Legionellosis Homo sapiens hsa05134	8	DEG_GSE131565; DEG_GSE168797_Mock_CBD; DEG_GSE168797_SARS_CBD; DEG_GSE179661_HepG2; DEG_GSE179661_MHCC97H; DEG_GSE201508_cGAMP; DEG_GSE261716_CBD20_28d; DEG_GSE272113_sCBD
Lysosome Homo sapiens hsa04142	8	DEG_GSE131565; DEG_GSE168797_Mock_CBD; DEG_GSE168797_SARS_CBD; DEG_GSE168797_SARS_CBDV; DEG_GSE201508_cGAMP; DEG_GSE201508_enthanol; DEG_GSE235310_Veh; DEG_GSE272113_sCBD
PERK-mediated unfolded protein response (GO:0036499)	8	DEG_GSE131565; DEG_GSE151512_6h; DEG_GSE168797_Mock_CBD; DEG_GSE179661_HepG2; DEG_GSE179661_MHCC97H; DEG_GSE201508_cGAMP; DEG_GSE235310_Veh; DEG_GSE272113_sCBD
regulation of lipid metabolic process (GO:0019216)	8	DEG_GSE131565; DEG_GSE151512_12h; DEG_GSE151512_24h; DEG_GSE151512_6h; DEG_GSE168797_SARS_CBD; DEG_GSE201508_cGAMP; DEG_GSE201508_enthanol; DEG_GSE261716_CBD0.2_28d
Steroid biosynthesis Homo sapiens hsa00100	8	DEG_GSE151512_12h; DEG_GSE151512_24h; DEG_GSE151512_6h; DEG_GSE168797_Mock_CBDV; DEG_GSE168797_SARS_CBD; DEG_GSE201508_cGAMP; DEG_GSE201508_enthanol; DEG_GSE272113_sCBD
Amino sugar and nucleotide sugar metabolism Homo sapiens hsa00520	7	DEG_GSE131565; DEG_GSE168797_Mock_CBD; DEG_GSE168797_SARS_CBD; DEG_GSE168797_SARS_CBDV; DEG_GSE201508_cGAMP; DEG_GSE201508_enthanol; DEG_GSE272113_sCBD
cellular response to glucose starvation (GO:0042149)	7	DEG_GSE151512_6h; DEG_GSE168797_Mock_CBD; DEG_GSE168797_SARS_CBD; DEG_GSE179661_HepG2; DEG_GSE179661_MHCC97H; DEG_GSE201508_cGAMP; DEG_GSE272113_sCBD
endoplasmic reticulum unfolded protein response (GO:0030968)	7	DEG_GSE131565; DEG_GSE168797_Mock_CBD; DEG_GSE168797_SARS_CBD; DEG_GSE179661_HepG2; DEG_GSE179661_MHCC97H; DEG_GSE201508_cGAMP; DEG_GSE272113_sCBD
negative regulation of apoptotic process (GO:0043066)	7	DEG_GSE131565; DEG_GSE168797_Mock_CBD; DEG_GSE168797_SARS_CBD; DEG_GSE179661_HepG2; DEG_GSE179661_MHCC97H; DEG_GSE201508_cGAMP; DEG_GSE272113_sCBD
Phagosome Homo sapiens hsa04145	7	DEG_GSE168797_Mock_CBD; DEG_GSE168797_SARS_CBD; DEG_GSE168797_SARS_CBDV; DEG_GSE201508_cGAMP; DEG_GSE201508_enthanol; DEG_GSE235310_Veh; DEG_GSE272113_sCBD
proteasome-mediated ubiquitin-dependent protein catabolic process (GO:0043161)	7	DEG_GSE131565; DEG_GSE168797_Mock_CBD; DEG_GSE168797_SARS_CBD; DEG_GSE179661_HepG2; DEG_GSE179661_MHCC97H; DEG_GSE261716_CBD0.2_2d; DEG_GSE261716_CBD20_28d
regulation of cholesterol biosynthetic process (GO:0045540)	7	DEG_GSE151512_12h; DEG_GSE151512_24h; DEG_GSE151512_6h; DEG_GSE168797_Mock_CBDV; DEG_GSE201508_cGAMP; DEG_GSE201508_enthanol; DEG_GSE272113_sCBD
retrograde protein transport, ER to cytosol (GO:0030970)	7	DEG_GSE131565; DEG_GSE168797_Mock_CBD; DEG_GSE168797_SARS_CBD; DEG_GSE179661_HepG2; DEG_GSE179661_MHCC97H; DEG_GSE201508_cGAMP; DEG_GSE272113_sCBD
Terpenoid backbone biosynthesis Homo sapiens hsa00900	7	DEG_GSE151512_12h; DEG_GSE151512_24h; DEG_GSE151512_6h; DEG_GSE168797_Mock_CBDV; DEG_GSE201508_cGAMP; DEG_GSE201508_enthanol; DEG_GSE272113_sCBD
Vibrio cholerae infection Homo sapiens hsa05110	7	DEG_GSE131565; DEG_GSE168797_Mock_CBD; DEG_GSE168797_SARS_CBD; DEG_GSE168797_SARS_CBDV; DEG_GSE201508_cGAMP; DEG_GSE201508_enthanol; DEG_GSE272113_sCBD
circadian regulation of gene expression (GO:0032922)	6	DEG_GSE131565; DEG_GSE151512_12h; DEG_GSE151512_24h; DEG_GSE179661_MHCC97H; DEG_GSE261716_CBD0.2_28d; DEG_GSE261716_CBD20_28d
Epithelial cell signaling in Helicobacter pylori infection Homo sapiens hsa05120	6	DEG_GSE131565; DEG_GSE168797_Mock_CBD; DEG_GSE179661_HepG2; DEG_GSE179661_MHCC97H; DEG_GSE201508_cGAMP; DEG_GSE201508_enthanol
ER to Golgi vesicle-mediated transport (GO:0006888)	6	DEG_GSE131565; DEG_GSE168797_Mock_CBD; DEG_GSE168797_SARS_CBD; DEG_GSE179661_MHCC97H; DEG_GSE201508_cGAMP; DEG_GSE201508_enthanol
FoxO signaling pathway Homo sapiens hsa04068	6	DEG_GSE131565; DEG_GSE152088; DEG_GSE179661_HepG2; DEG_GSE179661_MHCC97H; DEG_GSE201508_cGAMP; DEG_GSE272113_sCBD
macroautophagy (GO:0016236)	6	DEG_GSE131565; DEG_GSE168797_Mock_CBD; DEG_GSE168797_SARS_CBD; DEG_GSE179661_HepG2; DEG_GSE179661_MHCC97H; DEG_GSE261716_CBD0.2_2d
positive regulation of NF-kappaB transcription factor activity (GO:0051092)	6	DEG_GSE131565; DEG_GSE168797_Mock_CBD; DEG_GSE179661_HepG2; DEG_GSE179661_MHCC97H; DEG_GSE235310_Veh; DEG_GSE272113_sCBD
Proteasome Homo sapiens hsa03050	6	DEG_GSE168797_Mock_CBD; DEG_GSE168797_SARS_CBD; DEG_GSE168797_SARS_CBDV; DEG_GSE261716_CBD0.2_2d; DEG_GSE261716_CBD20_28d; DEG_GSE261716_CBD20_2d
protein deubiquitination (GO:0016579)	6	DEG_GSE168797_Mock_CBD; DEG_GSE168797_SARS_CBD; DEG_GSE179661_HepG2; DEG_GSE179661_MHCC97H; DEG_GSE261716_CBD0.2_2d; DEG_GSE261716_CBD20_28d
Protein export Homo sapiens hsa03060	6	DEG_GSE131565; DEG_GSE168797_Mock_CBD; DEG_GSE168797_SARS_CBD; DEG_GSE179661_MHCC97H; DEG_GSE201508_cGAMP; DEG_GSE272113_sCBD
protein polyubiquitination (GO:0000209)	6	DEG_GSE131565; DEG_GSE168797_Mock_CBD; DEG_GSE168797_SARS_CBD; DEG_GSE179661_HepG2; DEG_GSE179661_MHCC97H; DEG_GSE261716_CBD0.2_2d
regulation of cellular amino acid metabolic process (GO:0006521)	6	DEG_GSE168797_Mock_CBD; DEG_GSE168797_SARS_CBD; DEG_GSE168797_SARS_CBDV; DEG_GSE261716_CBD0.2_2d; DEG_GSE261716_CBD20_28d; DEG_GSE261716_CBD20_2d
regulation of macroautophagy (GO:0016241)	6	DEG_GSE131565; DEG_GSE168797_Mock_CBD; DEG_GSE168797_SARS_CBD; DEG_GSE168797_SARS_CBDV; DEG_GSE179661_MHCC97H; DEG_GSE201508_cGAMP
regulation of mRNA stability (GO:0043488)	6	DEG_GSE168797_Mock_CBD; DEG_GSE168797_SARS_CBD; DEG_GSE168797_SARS_CBDV; DEG_GSE179661_HepG2; DEG_GSE261716_CBD0.2_2d; DEG_GSE261716_CBD20_2d
TNF signaling pathway Homo sapiens hsa04668	6	DEG_GSE131565; DEG_GSE168797_Mock_CBD; DEG_GSE168797_Mock_CBDV; DEG_GSE179661_HepG2; DEG_GSE179661_MHCC97H; DEG_GSE272113_sCBD
ubiquitin-dependent ERAD pathway (GO:0030433)	6	DEG_GSE131565; DEG_GSE168797_Mock_CBD; DEG_GSE168797_SARS_CBD; DEG_GSE179661_MHCC97H; DEG_GSE201508_cGAMP; DEG_GSE201508_enthanol
Valine, leucine and isoleucine degradation Homo sapiens hsa00280	6	DEG_GSE168797_SARS_CBDV; DEG_GSE261716_CBD0.2_28d; DEG_GSE261716_CBD10_28d; DEG_GSE261716_CBD10_2d; DEG_GSE261716_CBD20_28d; DEG_GSE261716_CBD20_2d
anaphase-promoting complex-dependent catabolic process (GO:0031145)	5	DEG_GSE168797_Mock_CBD; DEG_GSE168797_SARS_CBD; DEG_GSE261716_CBD0.2_2d; DEG_GSE261716_CBD20_28d; DEG_GSE261716_CBD20_2d
antigen processing and presentation of exogenous peptide antigen via MHC class I, TAP-dependent (GO:0002479)	5	DEG_GSE168797_Mock_CBD; DEG_GSE168797_SARS_CBD; DEG_GSE261716_CBD0.2_2d; DEG_GSE261716_CBD20_28d; DEG_GSE261716_CBD20_2d
Apoptosis Homo sapiens hsa04210	5	DEG_GSE131565; DEG_GSE152088; DEG_GSE168797_Mock_CBD; DEG_GSE179661_HepG2; DEG_GSE272113_sCBD
ATF6-mediated unfolded protein response (GO:0036500)	5	DEG_GSE151512_6h; DEG_GSE179661_MHCC97H; DEG_GSE201508_cGAMP; DEG_GSE201508_enthanol; DEG_GSE272113_sCBD
autophagosome assembly (GO:0000045)	5	DEG_GSE131565; DEG_GSE168797_Mock_CBD; DEG_GSE168797_SARS_CBD; DEG_GSE179661_HepG2; DEG_GSE179661_MHCC97H
autophagy (GO:0006914)	5	DEG_GSE131565; DEG_GSE168797_Mock_CBD; DEG_GSE168797_SARS_CBD; DEG_GSE179661_HepG2; DEG_GSE179661_MHCC97H
COPII vesicle coating (GO:0048208)	5	DEG_GSE131565; DEG_GSE168797_Mock_CBD; DEG_GSE168797_SARS_CBD; DEG_GSE179661_MHCC97H; DEG_GSE201508_cGAMP
Cysteine and methionine metabolism Homo sapiens hsa00270	5	DEG_GSE168797_SARS_CBDV; DEG_GSE201508_cGAMP; DEG_GSE261716_CBD0.2_28d; DEG_GSE261716_CBD20_28d; DEG_GSE272113_sCBD
endosomal transport (GO:0016197)	5	DEG_GSE131565; DEG_GSE168797_Mock_CBD; DEG_GSE168797_SARS_CBD; DEG_GSE179661_HepG2; DEG_GSE179661_MHCC97H
Estrogen signaling pathway Homo sapiens hsa04915	5	DEG_GSE179661_HepG2; DEG_GSE179661_MHCC97H; DEG_GSE201508_cGAMP; DEG_GSE232624_EtOH0.25_CBD0.75_12h; DEG_GSE272113_sCBD
fatty acid beta-oxidation (GO:0006635)	5	DEG_GSE151512_12h; DEG_GSE168797_SARS_CBDV; DEG_GSE261716_CBD0.2_28d; DEG_GSE261716_CBD0.2_2d; DEG_GSE261716_CBD20_2d
Fatty acid metabolism Homo sapiens hsa01212	5	DEG_GSE151512_12h; DEG_GSE151512_24h; DEG_GSE168797_SARS_CBDV; DEG_GSE201508_enthanol; DEG_GSE261716_CBD0.2_28d
negative regulation of G2/M transition of mitotic cell cycle (GO:0010972)	5	DEG_GSE168797_Mock_CBD; DEG_GSE168797_SARS_CBD; DEG_GSE261716_CBD0.2_2d; DEG_GSE261716_CBD20_28d; DEG_GSE261716_CBD20_2d
negative regulation of transcription from RNA polymerase II promoter (GO:0000122)	5	DEG_GSE131565; DEG_GSE152088; DEG_GSE179661_HepG2; DEG_GSE179661_MHCC97H; DEG_GSE272113_sCBD
negative regulation of ubiquitin-protein ligase activity involved in mitotic cell cycle (GO:0051436)	5	DEG_GSE168797_Mock_CBD; DEG_GSE168797_SARS_CBD; DEG_GSE261716_CBD0.2_2d; DEG_GSE261716_CBD20_28d; DEG_GSE261716_CBD20_2d
NIK/NF-kappaB signaling (GO:0038061)	5	DEG_GSE168797_Mock_CBD; DEG_GSE168797_SARS_CBD; DEG_GSE261716_CBD0.2_2d; DEG_GSE261716_CBD20_28d; DEG_GSE261716_CBD20_2d
Pathways in cancer Homo sapiens hsa05200	5	DEG_GSE179661_HepG2; DEG_GSE179661_MHCC97H; DEG_GSE232624_EtOH0.25_CBD0.75_12h; DEG_GSE232624_EtOH0.75_CBD0.75_6h; DEG_GSE272113_sCBD
Peroxisome Homo sapiens hsa04146	5	DEG_GSE168797_SARS_CBDV; DEG_GSE261716_CBD0.2_28d; DEG_GSE261716_CBD10_28d; DEG_GSE261716_CBD10_2d; DEG_GSE261716_CBD20_28d
positive regulation of transcription from RNA polymerase II promoter (GO:0045944)	5	DEG_GSE131565; DEG_GSE151512_3h; DEG_GSE152088; DEG_GSE179661_HepG2; DEG_GSE179661_MHCC97H
positive regulation of ubiquitin-protein ligase activity involved in regulation of mitotic cell cycle transition (GO:0051437)	5	DEG_GSE168797_Mock_CBD; DEG_GSE168797_SARS_CBD; DEG_GSE261716_CBD0.2_2d; DEG_GSE261716_CBD20_28d; DEG_GSE261716_CBD20_2d
PPAR signaling pathway Homo sapiens hsa03320	5	DEG_GSE168797_SARS_CBDV; DEG_GSE201508_cGAMP; DEG_GSE201508_enthanol; DEG_GSE261716_CBD0.2_28d; DEG_GSE272113_sCBD
regulation of transcription from RNA polymerase II promoter in response to hypoxia (GO:0061418)	5	DEG_GSE168797_Mock_CBD; DEG_GSE168797_SARS_CBD; DEG_GSE261716_CBD0.2_2d; DEG_GSE261716_CBD20_28d; DEG_GSE261716_CBD20_2d
SCF-dependent proteasomal ubiquitin-dependent protein catabolic process (GO:0031146)	5	DEG_GSE168797_Mock_CBD; DEG_GSE168797_SARS_CBD; DEG_GSE261716_CBD0.2_2d; DEG_GSE261716_CBD20_28d; DEG_GSE261716_CBD20_2d
Sphingolipid signaling pathway Homo sapiens hsa04071	5	DEG_GSE131565; DEG_GSE151512_24h; DEG_GSE179661_HepG2; DEG_GSE179661_MHCC97H; DEG_GSE272113_sCBD
ubiquitin-dependent protein catabolic process (GO:0006511)	5	DEG_GSE131565; DEG_GSE168797_Mock_CBD; DEG_GSE168797_SARS_CBD; DEG_GSE179661_HepG2; DEG_GSE179661_MHCC97H
antigen processing and presentation of peptide antigen via MHC class I (GO:0002474)	4	DEG_GSE168797_Mock_CBD; DEG_GSE168797_SARS_CBD; DEG_GSE201508_cGAMP; DEG_GSE201508_enthanol
cell cycle arrest (GO:0007050)	4	DEG_GSE152088; DEG_GSE179661_MHCC97H; DEG_GSE201508_cGAMP; DEG_GSE272113_sCBD
cellular iron ion homeostasis (GO:0006879)	4	DEG_GSE168797_SARS_CBD; DEG_GSE168797_SARS_CBDV; DEG_GSE201508_enthanol; DEG_GSE272113_sCBD
cellular response to oxidative stress (GO:0034599)	4	DEG_GSE168797_SARS_CBD; DEG_GSE168797_SARS_CBDV; DEG_GSE272113_sCBD; DEG_GSE274435_DMSO_24h
cellular response to starvation (GO:0009267)	4	DEG_GSE151512_12h; DEG_GSE151512_24h; DEG_GSE201508_cGAMP; DEG_GSE201508_enthanol
Chronic myeloid leukemia Homo sapiens hsa05220	4	DEG_GSE131565; DEG_GSE179661_HepG2; DEG_GSE179661_MHCC97H; DEG_GSE272113_sCBD
Circadian rhythm Homo sapiens hsa04710	4	DEG_GSE131565; DEG_GSE151512_12h; DEG_GSE151512_24h; DEG_GSE179661_MHCC97H
cytoplasmic translation (GO:0002181)	4	DEG_GSE179661_HepG2; DEG_GSE179661_MHCC97H; DEG_GSE261716_CBD0.2_2d; DEG_GSE261716_CBD20_2d
endoplasmic reticulum mannose trimming (GO:1904380)	4	DEG_GSE168797_Mock_CBD; DEG_GSE168797_SARS_CBD; DEG_GSE179661_MHCC97H; DEG_GSE201508_cGAMP
Epstein-Barr virus infection Homo sapiens hsa05169	4	DEG_GSE168797_Mock_CBD; DEG_GSE179661_HepG2; DEG_GSE179661_MHCC97H; DEG_GSE261716_CBD20_28d
insulin receptor signaling pathway (GO:0008286)	4	DEG_GSE168797_SARS_CBD; DEG_GSE179661_MHCC97H; DEG_GSE201508_cGAMP; DEG_GSE272113_sCBD
Insulin resistance Homo sapiens hsa04931	4	DEG_GSE179661_HepG2; DEG_GSE179661_MHCC97H; DEG_GSE261716_CBD0.2_28d; DEG_GSE272113_sCBD
low-density lipoprotein particle clearance (GO:0034383)	4	DEG_GSE168797_SARS_CBDV; DEG_GSE201508_cGAMP; DEG_GSE201508_enthanol; DEG_GSE272113_sCBD
membrane organization (GO:0061024)	4	DEG_GSE131565; DEG_GSE179661_HepG2; DEG_GSE179661_MHCC97H; DEG_GSE201508_cGAMP
mitophagy (GO:0000422)	4	DEG_GSE131565; DEG_GSE168797_SARS_CBD; DEG_GSE179661_HepG2; DEG_GSE179661_MHCC97H
negative regulation of canonical Wnt signaling pathway (GO:0090090)	4	DEG_GSE168797_SARS_CBD; DEG_GSE261716_CBD0.2_2d; DEG_GSE261716_CBD20_28d; DEG_GSE261716_CBD20_2d
Neurotrophin signaling pathway Homo sapiens hsa04722	4	DEG_GSE131565; DEG_GSE179661_HepG2; DEG_GSE179661_MHCC97H; DEG_GSE272113_sCBD
NF-kappa B signaling pathway Homo sapiens hsa04064	4	DEG_GSE131565; DEG_GSE168797_Mock_CBD; DEG_GSE179661_HepG2; DEG_GSE179661_MHCC97H
Non-alcoholic fatty liver disease (NAFLD) Homo sapiens hsa04932	4	DEG_GSE152088; DEG_GSE261716_CBD0.2_28d; DEG_GSE261716_CBD0.2_2d; DEG_GSE261716_CBD20_2d
One carbon pool by folate Homo sapiens hsa00670	4	DEG_GSE151512_12h; DEG_GSE151512_6h; DEG_GSE235310_Veh; DEG_GSE272113_sCBD
Osteoclast differentiation Homo sapiens hsa04380	4	DEG_GSE168797_Mock_CBD; DEG_GSE179661_HepG2; DEG_GSE179661_MHCC97H; DEG_GSE201508_enthanol
phagosome acidification (GO:0090383)	4	DEG_GSE168797_Mock_CBD; DEG_GSE168797_SARS_CBD; DEG_GSE201508_cGAMP; DEG_GSE235310_Veh
positive regulation of apoptotic process (GO:0043065)	4	DEG_GSE131565; DEG_GSE168797_Mock_CBD; DEG_GSE179661_HepG2; DEG_GSE179661_MHCC97H
post-translational protein modification (GO:0043687)	4	DEG_GSE152088; DEG_GSE168797_Mock_CBD; DEG_GSE168797_SARS_CBD; DEG_GSE261716_CBD0.2_2d
protein N-linked glycosylation via asparagine (GO:0018279)	4	DEG_GSE168797_Mock_CBD; DEG_GSE168797_SARS_CBD; DEG_GSE201508_cGAMP; DEG_GSE272113_sCBD
protein stabilization (GO:0050821)	4	DEG_GSE168797_Mock_CBD; DEG_GSE168797_SARS_CBD; DEG_GSE179661_MHCC97H; DEG_GSE201508_cGAMP
response to unfolded protein (GO:0006986)	4	DEG_GSE151512_6h; DEG_GSE168797_SARS_CBD; DEG_GSE179661_MHCC97H; DEG_GSE201508_cGAMP
retrograde vesicle-mediated transport, Golgi to ER (GO:0006890)	4	DEG_GSE131565; DEG_GSE168797_Mock_CBD; DEG_GSE168797_SARS_CBD; DEG_GSE179661_MHCC97H
Rheumatoid arthritis Homo sapiens hsa05323	4	DEG_GSE179661_HepG2; DEG_GSE201508_cGAMP; DEG_GSE235310_Veh; DEG_GSE272113_sCBD
SNARE interactions in vesicular transport Homo sapiens hsa04130	4	DEG_GSE131565; DEG_GSE168797_SARS_CBD; DEG_GSE179661_MHCC97H; DEG_GSE261716_CBD0.2_2d
stimulatory C-type lectin receptor signaling pathway (GO:0002223)	4	DEG_GSE168797_Mock_CBD; DEG_GSE168797_SARS_CBD; DEG_GSE261716_CBD0.2_2d; DEG_GSE261716_CBD20_28d
T cell receptor signaling pathway (GO:0050852)	4	DEG_GSE168797_Mock_CBD; DEG_GSE168797_SARS_CBD; DEG_GSE261716_CBD0.2_2d; DEG_GSE261716_CBD20_28d
transferrin transport (GO:0033572)	4	DEG_GSE168797_SARS_CBD; DEG_GSE168797_SARS_CBDV; DEG_GSE201508_cGAMP; DEG_GSE272113_sCBD
tumor necrosis factor-mediated signaling pathway (GO:0033209)	4	DEG_GSE168797_Mock_CBD; DEG_GSE168797_SARS_CBD; DEG_GSE261716_CBD0.2_2d; DEG_GSE261716_CBD20_2d
UDP-N-acetylglucosamine biosynthetic process (GO:0006048)	4	DEG_GSE168797_Mock_CBD; DEG_GSE168797_SARS_CBD; DEG_GSE179661_HepG2; DEG_GSE201508_enthanol
alpha-linolenic acid metabolic process (GO:0036109)	3	DEG_GSE151512_12h; DEG_GSE201508_cGAMP; DEG_GSE201508_enthanol
amino acid transport (GO:0006865)	3	DEG_GSE151512_12h; DEG_GSE201508_cGAMP; DEG_GSE272113_sCBD
Carbon metabolism Homo sapiens hsa01200	3	DEG_GSE168797_SARS_CBDV; DEG_GSE261716_CBD0.2_28d; DEG_GSE272113_sCBD
cellular response to cadmium ion (GO:0071276)	3	DEG_GSE151512_12h; DEG_GSE151512_6h; DEG_GSE201508_enthanol
cellular response to hypoxia (GO:0071456)	3	DEG_GSE168797_Mock_CBD; DEG_GSE179661_MHCC97H; DEG_GSE272113_sCBD
cellular response to lipopolysaccharide (GO:0071222)	3	DEG_GSE179661_MHCC97H; DEG_GSE235310_Veh; DEG_GSE272113_sCBD
DNA damage response, signal transduction by p53 class mediator resulting in cell cycle arrest (GO:0006977)	3	DEG_GSE152088; DEG_GSE179661_HepG2; DEG_GSE179661_MHCC97H
Endocytosis Homo sapiens hsa04144	3	DEG_GSE131565; DEG_GSE179661_HepG2; DEG_GSE179661_MHCC97H
Fatty acid degradation Homo sapiens hsa00071	3	DEG_GSE168797_SARS_CBDV; DEG_GSE261716_CBD0.2_28d; DEG_GSE261716_CBD0.2_2d
folic acid metabolic process (GO:0046655)	3	DEG_GSE151512_12h; DEG_GSE151512_6h; DEG_GSE272113_sCBD
Glutathione metabolism Homo sapiens hsa00480	3	DEG_GSE168797_SARS_CBDV; DEG_GSE201508_enthanol; DEG_GSE272113_sCBD
Golgi organization (GO:0007030)	3	DEG_GSE131565; DEG_GSE168797_Mock_CBD; DEG_GSE179661_MHCC97H
HTLV-I infection Homo sapiens hsa05166	3	DEG_GSE152088; DEG_GSE179661_HepG2; DEG_GSE272113_sCBD
I-kappaB kinase/NF-kappaB signaling (GO:0007249)	3	DEG_GSE131565; DEG_GSE179661_HepG2; DEG_GSE179661_MHCC97H
intracellular protein transport (GO:0006886)	3	DEG_GSE131565; DEG_GSE179661_MHCC97H; DEG_GSE201508_cGAMP
lipid metabolic process (GO:0006629)	3	DEG_GSE151512_12h; DEG_GSE201508_cGAMP; DEG_GSE201508_enthanol
Longevity regulating pathway - mammal Homo sapiens hsa04211	3	DEG_GSE131565; DEG_GSE179661_HepG2; DEG_GSE179661_MHCC97H
MAPK cascade (GO:0000165)	3	DEG_GSE168797_Mock_CBD; DEG_GSE168797_SARS_CBD; DEG_GSE261716_CBD0.2_2d
MAPK signaling pathway Homo sapiens hsa04010	3	DEG_GSE131565; DEG_GSE179661_HepG2; DEG_GSE179661_MHCC97H
mitochondrial respiratory chain complex I assembly (GO:0032981)	3	DEG_GSE261716_CBD0.2_2d; DEG_GSE261716_CBD20_28d; DEG_GSE261716_CBD20_2d
mitochondrial translational elongation (GO:0070125)	3	DEG_GSE261716_CBD0.2_2d; DEG_GSE261716_CBD20_28d; DEG_GSE261716_CBD20_2d
mitochondrial translational termination (GO:0070126)	3	DEG_GSE261716_CBD0.2_2d; DEG_GSE261716_CBD20_28d; DEG_GSE261716_CBD20_2d
multivesicular body assembly (GO:0036258)	3	DEG_GSE131565; DEG_GSE168797_SARS_CBD; DEG_GSE179661_MHCC97H
negative regulation of gene expression (GO:0010629)	3	DEG_GSE151512_24h; DEG_GSE179661_HepG2; DEG_GSE272113_sCBD
negative regulation of type I interferon production (GO:0032480)	3	DEG_GSE168797_Mock_CBD; DEG_GSE168797_SARS_CBD; DEG_GSE179661_MHCC97H
NOD-like receptor signaling pathway Homo sapiens hsa04621	3	DEG_GSE131565; DEG_GSE168797_Mock_CBD; DEG_GSE179661_MHCC97H
positive regulation of I-kappaB kinase/NF-kappaB signaling (GO:0043123)	3	DEG_GSE131565; DEG_GSE179661_HepG2; DEG_GSE179661_MHCC97H
positive regulation of transcription from RNA polymerase II promoter in response to endoplasmic reticulum stress (GO:1990440)	3	DEG_GSE179661_HepG2; DEG_GSE179661_MHCC97H; DEG_GSE272113_sCBD
protein phosphorylation (GO:0006468)	3	DEG_GSE131565; DEG_GSE179661_MHCC97H; DEG_GSE235310_Veh
protein targeting to ER (GO:0045047)	3	DEG_GSE131565; DEG_GSE168797_SARS_CBD; DEG_GSE179661_MHCC97H
protein ubiquitination (GO:0016567)	3	DEG_GSE168797_SARS_CBD; DEG_GSE179661_HepG2; DEG_GSE179661_MHCC97H
regulation of transcription, DNA-templated (GO:0006355)	3	DEG_GSE168797_Mock_CBD; DEG_GSE179661_HepG2; DEG_GSE179661_MHCC97H
regulation of tumor necrosis factor-mediated signaling pathway (GO:0010803)	3	DEG_GSE131565; DEG_GSE179661_HepG2; DEG_GSE179661_MHCC97H
Renal cell carcinoma Homo sapiens hsa05211	3	DEG_GSE131565; DEG_GSE179661_HepG2; DEG_GSE179661_MHCC97H
ribosomal large subunit assembly (GO:0000027)	3	DEG_GSE179661_MHCC97H; DEG_GSE261716_CBD20_28d; DEG_GSE261716_CBD20_2d
Salmonella infection Homo sapiens hsa05132	3	DEG_GSE131565; DEG_GSE179661_HepG2; DEG_GSE179661_MHCC97H
transcription initiation from RNA polymerase II promoter (GO:0006367)	3	DEG_GSE179661_HepG2; DEG_GSE179661_MHCC97H; DEG_GSE261716_CBD20_28d
transmembrane transport (GO:0055085)	3	DEG_GSE168797_SARS_CBD; DEG_GSE261716_CBD0.2_2d; DEG_GSE261716_CBD20_28d
Tuberculosis Homo sapiens hsa05152	3	DEG_GSE168797_Mock_CBD; DEG_GSE235310_Veh; DEG_GSE272113_sCBD
viral life cycle (GO:0019058)	3	DEG_GSE168797_SARS_CBD; DEG_GSE179661_HepG2; DEG_GSE179661_MHCC97H
Wnt signaling pathway, planar cell polarity pathway (GO:0060071)	3	DEG_GSE168797_SARS_CBD; DEG_GSE261716_CBD0.2_2d; DEG_GSE261716_CBD20_2d
3'-UTR-mediated mRNA destabilization (GO:0061158)	2	DEG_GSE179661_HepG2; DEG_GSE179661_MHCC97H
Acute myeloid leukemia Homo sapiens hsa05221	2	DEG_GSE179661_HepG2; DEG_GSE179661_MHCC97H
Alzheimer's disease Homo sapiens hsa05010	2	DEG_GSE261716_CBD0.2_2d; DEG_GSE261716_CBD20_2d
AMPK signaling pathway Homo sapiens hsa04152	2	DEG_GSE179661_HepG2; DEG_GSE179661_MHCC97H
Antigen processing and presentation Homo sapiens hsa04612	2	DEG_GSE201508_cGAMP; DEG_GSE201508_enthanol
apoptotic process (GO:0006915)	2	DEG_GSE179661_HepG2; DEG_GSE179661_MHCC97H
autophagosome maturation (GO:0097352)	2	DEG_GSE168797_SARS_CBD; DEG_GSE261716_CBD0.2_2d
Biosynthesis of amino acids Homo sapiens hsa01230	2	DEG_GSE261716_CBD0.2_28d; DEG_GSE272113_sCBD
Bladder cancer Homo sapiens hsa05219	2	DEG_GSE179661_HepG2; DEG_GSE179661_MHCC97H
Cardiac muscle contraction Homo sapiens hsa04260	2	DEG_GSE261716_CBD0.2_2d; DEG_GSE261716_CBD20_2d
cell redox homeostasis (GO:0045454)	2	DEG_GSE151512_6h; DEG_GSE274435_DMSO_24h
cell separation after cytokinesis (GO:0000920)	2	DEG_GSE168797_SARS_CBD; DEG_GSE179661_MHCC97H
cellular response to amino acid stimulus (GO:0071230)	2	DEG_GSE179661_MHCC97H; DEG_GSE201508_cGAMP
cellular response to DNA damage stimulus (GO:0006974)	2	DEG_GSE179661_HepG2; DEG_GSE179661_MHCC97H
cellular response to insulin stimulus (GO:0032869)	2	DEG_GSE131565; DEG_GSE179661_MHCC97H
cholesterol homeostasis (GO:0042632)	2	DEG_GSE168797_Mock_CBDV; DEG_GSE272113_sCBD
cholesterol metabolic process (GO:0008203)	2	DEG_GSE168797_SARS_CBDV; DEG_GSE235310_Veh
Collecting duct acid secretion Homo sapiens hsa04966	2	DEG_GSE168797_SARS_CBD; DEG_GSE201508_cGAMP
cornification (GO:0070268)	2	DEG_GSE131565; DEG_GSE152088
cotranslational protein targeting to membrane (GO:0006613)	2	DEG_GSE168797_SARS_CBD; DEG_GSE179661_MHCC97H
defense response to virus (GO:0051607)	2	DEG_GSE168797_SARS_CBD; DEG_GSE235310_Veh
Dorso-ventral axis formation Homo sapiens hsa04320	2	DEG_GSE131565; DEG_GSE179661_MHCC97H
endocytosis (GO:0006897)	2	DEG_GSE179661_MHCC97H; DEG_GSE272113_sCBD
Endometrial cancer Homo sapiens hsa05213	2	DEG_GSE179661_HepG2; DEG_GSE179661_MHCC97H
endoplasmic reticulum calcium ion homeostasis (GO:0032469)	2	DEG_GSE131565; DEG_GSE179661_MHCC97H
endosome organization (GO:0007032)	2	DEG_GSE179661_MHCC97H; DEG_GSE272113_sCBD
entrainment of circadian clock by photoperiod (GO:0043153)	2	DEG_GSE151512_12h; DEG_GSE179661_MHCC97H
epithelial cell differentiation (GO:0030855)	2	DEG_GSE168797_SARS_CBDV; DEG_GSE272113_sCBD
ER-associated misfolded protein catabolic process (GO:0071712)	2	DEG_GSE168797_Mock_CBD; DEG_GSE168797_SARS_CBD
ERAD pathway (GO:0036503)	2	DEG_GSE179661_MHCC97H; DEG_GSE201508_cGAMP
ErbB signaling pathway Homo sapiens hsa04012	2	DEG_GSE179661_HepG2; DEG_GSE179661_MHCC97H
ESCRT III complex disassembly (GO:1904903)	2	DEG_GSE168797_SARS_CBD; DEG_GSE179661_MHCC97H
establishment of endothelial intestinal barrier (GO:0090557)	2	DEG_GSE131565; DEG_GSE179661_MHCC97H
extracellular matrix organization (GO:0030198)	2	DEG_GSE168797_Mock_CBDV; DEG_GSE274435_DMSO_24h
Galactose metabolism Homo sapiens hsa00052	2	DEG_GSE168797_SARS_CBDV; DEG_GSE272113_sCBD
Glycine, serine and threonine metabolism Homo sapiens hsa00260	2	DEG_GSE235310_Veh; DEG_GSE272113_sCBD
Glycolysis / Gluconeogenesis Homo sapiens hsa00010	2	DEG_GSE168797_SARS_CBDV; DEG_GSE272113_sCBD
Glycosaminoglycan degradation Homo sapiens hsa00531	2	DEG_GSE235310_Veh; DEG_GSE272113_sCBD
glycosphingolipid metabolic process (GO:0006687)	2	DEG_GSE168797_SARS_CBDV; DEG_GSE272113_sCBD
Golgi to plasma membrane protein transport (GO:0043001)	2	DEG_GSE131565; DEG_GSE179661_MHCC97H
Hepatitis B Homo sapiens hsa05161	2	DEG_GSE179661_MHCC97H; DEG_GSE272113_sCBD
Hepatitis C Homo sapiens hsa05160	2	DEG_GSE179661_HepG2; DEG_GSE179661_MHCC97H
HIF-1 signaling pathway Homo sapiens hsa04066	2	DEG_GSE179661_HepG2; DEG_GSE272113_sCBD
Huntington's disease Homo sapiens hsa05016	2	DEG_GSE261716_CBD0.2_2d; DEG_GSE261716_CBD20_2d
Insulin signaling pathway Homo sapiens hsa04910	2	DEG_GSE131565; DEG_GSE179661_MHCC97H
interferon-gamma-mediated signaling pathway (GO:0060333)	2	DEG_GSE179661_MHCC97H; DEG_GSE235310_Veh
intra-Golgi vesicle-mediated transport (GO:0006891)	2	DEG_GSE131565; DEG_GSE179661_MHCC97H
intracellular signal transduction (GO:0035556)	2	DEG_GSE131565; DEG_GSE179661_MHCC97H
long-chain fatty-acyl-CoA biosynthetic process (GO:0035338)	2	DEG_GSE151512_12h; DEG_GSE151512_24h
mitochondrial electron transport, cytochrome c to oxygen (GO:0006123)	2	DEG_GSE168797_SARS_CBD; DEG_GSE261716_CBD20_2d
mitochondrial electron transport, NADH to ubiquinone (GO:0006120)	2	DEG_GSE261716_CBD0.2_2d; DEG_GSE261716_CBD20_2d
monocyte differentiation (GO:0030224)	2	DEG_GSE201508_cGAMP; DEG_GSE235310_Veh
mRNA splicing, via spliceosome (GO:0000398)	2	DEG_GSE179661_MHCC97H; DEG_GSE261716_CBD0.2_2d
mTOR signaling pathway Homo sapiens hsa04150	2	DEG_GSE179661_MHCC97H; DEG_GSE201508_cGAMP
N-Glycan biosynthesis Homo sapiens hsa00510	2	DEG_GSE168797_SARS_CBD; DEG_GSE272113_sCBD
negative regulation of cell proliferation (GO:0008285)	2	DEG_GSE152088; DEG_GSE179661_MHCC97H
negative regulation of transcription, DNA-templated (GO:0045892)	2	DEG_GSE179661_HepG2; DEG_GSE179661_MHCC97H
negative regulation of viral genome replication (GO:0045071)	2	DEG_GSE168797_SARS_CBD; DEG_GSE235310_Veh
nucleotide-binding oligomerization domain containing signaling pathway (GO:0070423)	2	DEG_GSE131565; DEG_GSE179661_MHCC97H
oxidation-reduction process (GO:0055114)	2	DEG_GSE168797_SARS_CBDV; DEG_GSE261716_CBD0.2_28d
Oxidative phosphorylation Homo sapiens hsa00190	2	DEG_GSE261716_CBD0.2_2d; DEG_GSE261716_CBD20_2d
Pancreatic cancer Homo sapiens hsa05212	2	DEG_GSE179661_HepG2; DEG_GSE179661_MHCC97H
Parkinson's disease Homo sapiens hsa05012	2	DEG_GSE261716_CBD0.2_2d; DEG_GSE261716_CBD20_2d
platelet degranulation (GO:0002576)	2	DEG_GSE201508_enthanol; DEG_GSE272113_sCBD
positive regulation of autophagy (GO:0010508)	2	DEG_GSE179661_HepG2; DEG_GSE179661_MHCC97H
positive regulation of canonical Wnt signaling pathway (GO:0090263)	2	DEG_GSE168797_SARS_CBD; DEG_GSE261716_CBD0.2_2d
positive regulation of interferon-alpha production (GO:0032727)	2	DEG_GSE168797_SARS_CBD; DEG_GSE179661_MHCC97H
positive regulation of interferon-beta production (GO:0032728)	2	DEG_GSE168797_SARS_CBD; DEG_GSE179661_MHCC97H
positive regulation of neuron apoptotic process (GO:0043525)	2	DEG_GSE179661_MHCC97H; DEG_GSE201508_cGAMP
positive regulation of pri-miRNA transcription from RNA polymerase II promoter (GO:1902895)	2	DEG_GSE179661_MHCC97H; DEG_GSE272113_sCBD
positive regulation of proteasomal ubiquitin-dependent protein catabolic process (GO:0032436)	2	DEG_GSE179661_HepG2; DEG_GSE179661_MHCC97H
positive regulation of protein phosphorylation (GO:0001934)	2	DEG_GSE168797_Mock_CBDV; DEG_GSE235310_Veh
positive regulation of transcription, DNA-templated (GO:0045893)	2	DEG_GSE179661_HepG2; DEG_GSE179661_MHCC97H
positive regulation of transforming growth factor beta receptor signaling pathway (GO:0030511)	2	DEG_GSE131565; DEG_GSE179661_MHCC97H
positive regulation of viral release from host cell (GO:1902188)	2	DEG_GSE168797_SARS_CBD; DEG_GSE179661_MHCC97H
posttranslational protein targeting to endoplasmic reticulum membrane (GO:0006620)	2	DEG_GSE168797_SARS_CBD; DEG_GSE179661_MHCC97H
Prolactin signaling pathway Homo sapiens hsa04917	2	DEG_GSE179661_HepG2; DEG_GSE179661_MHCC97H
protein K48-linked ubiquitination (GO:0070936)	2	DEG_GSE179661_MHCC97H; DEG_GSE261716_CBD20_28d
protein K63-linked deubiquitination (GO:0070536)	2	DEG_GSE168797_Mock_CBD; DEG_GSE179661_MHCC97H
protein N-linked glycosylation (GO:0006487)	2	DEG_GSE168797_SARS_CBD; DEG_GSE272113_sCBD
protein secretion (GO:0009306)	2	DEG_GSE168797_SARS_CBD; DEG_GSE179661_MHCC97H
protein targeting to mitochondrion (GO:0006626)	2	DEG_GSE261716_CBD20_28d; DEG_GSE261716_CBD20_2d
protein ubiquitination involved in ubiquitin-dependent protein catabolic process (GO:0042787)	2	DEG_GSE131565; DEG_GSE179661_MHCC97H
proteolysis involved in cellular protein catabolic process (GO:0051603)	2	DEG_GSE168797_SARS_CBD; DEG_GSE272113_sCBD
Purine metabolism Homo sapiens hsa00230	2	DEG_GSE168797_Mock_CBDV; DEG_GSE272113_sCBD
regulation of angiogenesis (GO:0045765)	2	DEG_GSE201508_enthanol; DEG_GSE272113_sCBD
regulation of cyclin-dependent protein serine/threonine kinase activity (GO:0000079)	2	DEG_GSE152088; DEG_GSE179661_MHCC97H
regulation of mitotic cell cycle (GO:0007346)	2	DEG_GSE179661_HepG2; DEG_GSE179661_MHCC97H
regulation of mitotic spindle assembly (GO:1901673)	2	DEG_GSE168797_SARS_CBD; DEG_GSE179661_MHCC97H
regulation of necroptotic process (GO:0060544)	2	DEG_GSE168797_SARS_CBD; DEG_GSE179661_MHCC97H
response to cytokine (GO:0034097)	2	DEG_GSE131565; DEG_GSE168797_SARS_CBDV
ribosomal small subunit assembly (GO:0000028)	2	DEG_GSE179661_MHCC97H; DEG_GSE261716_CBD20_2d
Ribosome biogenesis in eukaryotes Homo sapiens hsa03008	2	DEG_GSE261716_CBD0.2_2d; DEG_GSE272113_sCBD
RNA export from nucleus (GO:0006405)	2	DEG_GSE179661_MHCC97H; DEG_GSE261716_CBD0.2_2d
RNA transport Homo sapiens hsa03013	2	DEG_GSE179661_MHCC97H; DEG_GSE261716_CBD20_28d
Shigellosis Homo sapiens hsa05131	2	DEG_GSE131565; DEG_GSE179661_MHCC97H
small GTPase mediated signal transduction (GO:0007264)	2	DEG_GSE131565; DEG_GSE179661_MHCC97H
Spliceosome Homo sapiens hsa03040	2	DEG_GSE179661_MHCC97H; DEG_GSE261716_CBD0.2_2d
Thyroid hormone synthesis Homo sapiens hsa04918	2	DEG_GSE201508_enthanol; DEG_GSE272113_sCBD
transcription elongation from RNA polymerase II promoter (GO:0006368)	2	DEG_GSE179661_MHCC97H; DEG_GSE261716_CBD0.2_2d
transcription from RNA polymerase II promoter (GO:0006366)	2	DEG_GSE179661_HepG2; DEG_GSE179661_MHCC97H
transcription-coupled nucleotide-excision repair (GO:0006283)	2	DEG_GSE261716_CBD0.2_2d; DEG_GSE261716_CBD20_2d
type I interferon signaling pathway (GO:0060337)	2	DEG_GSE168797_SARS_CBD; DEG_GSE235310_Veh
Vasopressin-regulated water reabsorption Homo sapiens hsa04962	2	DEG_GSE168797_Mock_CBD; DEG_GSE179661_MHCC97H
viral budding (GO:0046755)	2	DEG_GSE168797_SARS_CBD; DEG_GSE179661_MHCC97H
viral budding via host ESCRT complex (GO:0039702)	2	DEG_GSE168797_SARS_CBD; DEG_GSE179661_MHCC97H
Viral carcinogenesis Homo sapiens hsa05203	2	DEG_GSE179661_HepG2; DEG_GSE179661_MHCC97H
xenobiotic metabolic process (GO:0006805)	2	DEG_GSE168797_SARS_CBDV; DEG_GSE261716_CBD0.2_28d
7-methylguanosine mRNA capping (GO:0006370)	1	DEG_GSE261716_CBD0.2_2d
actin cytoskeleton organization (GO:0030036)	1	DEG_GSE179661_MHCC97H
activation of GTPase activity (GO:0090630)	1	DEG_GSE131565
activation of JUN kinase activity (GO:0007257)	1	DEG_GSE179661_HepG2
Adipocytokine signaling pathway Homo sapiens hsa04920	1	DEG_GSE261716_CBD0.2_28d
aerobic respiration (GO:0009060)	1	DEG_GSE261716_CBD20_2d
Aminoacyl-tRNA biosynthesis Homo sapiens hsa00970	1	DEG_GSE272113_sCBD
angiogenesis (GO:0001525)	1	DEG_GSE232624_EtOH0.75_CBD0.75_6h
antigen processing and presentation of exogenous peptide antigen via MHC class II (GO:0019886)	1	DEG_GSE201508_cGAMP
Arginine and proline metabolism Homo sapiens hsa00330	1	DEG_GSE272113_sCBD
B cell receptor signaling pathway Homo sapiens hsa04662	1	DEG_GSE131565
Biosynthesis of unsaturated fatty acids Homo sapiens hsa01040	1	DEG_GSE168797_SARS_CBDV
canonical glycolysis (GO:0061621)	1	DEG_GSE272113_sCBD
cardiac muscle cell differentiation (GO:0055007)	1	DEG_GSE179661_MHCC97H
cell aging (GO:0007569)	1	DEG_GSE179661_MHCC97H
cellular protein localization (GO:0034613)	1	DEG_GSE201508_cGAMP
cellular protein metabolic process (GO:0044267)	1	DEG_GSE168797_SARS_CBDV
cellular protein modification process (GO:0006464)	1	DEG_GSE168797_SARS_CBD
cellular response to epidermal growth factor stimulus (GO:0071364)	1	DEG_GSE179661_MHCC97H
cellular response to hydrogen peroxide (GO:0070301)	1	DEG_GSE179661_MHCC97H
cellular response to ionizing radiation (GO:0071479)	1	DEG_GSE179661_MHCC97H
cellular response to laminar fluid shear stress (GO:0071499)	1	DEG_GSE179661_MHCC97H
cellular response to vascular endothelial growth factor stimulus (GO:0035924)	1	DEG_GSE179661_MHCC97H
Central carbon metabolism in cancer Homo sapiens hsa05230	1	DEG_GSE272113_sCBD
ceramide metabolic process (GO:0006672)	1	DEG_GSE272113_sCBD
Chagas disease (American trypanosomiasis) Homo sapiens hsa05142	1	DEG_GSE201508_cGAMP
Chemical carcinogenesis Homo sapiens hsa05204	1	DEG_GSE168797_SARS_CBDV
Chemokine signaling pathway Homo sapiens hsa04062	1	DEG_GSE232624_EtOH0.25_CBD0.75_12h
cholesterol efflux (GO:0033344)	1	DEG_GSE261716_CBD0.2_2d
Choline metabolism in cancer Homo sapiens hsa05231	1	DEG_GSE179661_MHCC97H
chylomicron assembly (GO:0034378)	1	DEG_GSE261716_CBD0.2_2d
chylomicron remodeling (GO:0034371)	1	DEG_GSE261716_CBD0.2_2d
ciliary basal body docking (GO:0097711)	1	DEG_GSE151512_6h
cilium assembly (GO:0060271)	1	DEG_GSE151512_6h
Circadian entrainment Homo sapiens hsa04713	1	DEG_GSE232624_EtOH0.25_CBD0.75_12h
Cocaine addiction Homo sapiens hsa05030	1	DEG_GSE179661_MHCC97H
Colorectal cancer Homo sapiens hsa05210	1	DEG_GSE179661_MHCC97H
Complement and coagulation cascades Homo sapiens hsa04610	1	DEG_GSE168797_Mock_CBDV
dendritic spine morphogenesis (GO:0060997)	1	DEG_GSE151512_12h
detection of virus (GO:0009597)	1	DEG_GSE168797_SARS_CBD
digestion (GO:0007586)	1	DEG_GSE168797_SARS_CBDV
DNA methylation (GO:0006306)	1	DEG_GSE201508_cGAMP
DNA repair (GO:0006281)	1	DEG_GSE151512_6h
dolichyl diphosphate biosynthetic process (GO:0006489)	1	DEG_GSE272113_sCBD
Drug metabolism - cytochrome P450 Homo sapiens hsa00982	1	DEG_GSE168797_SARS_CBDV
early endosome to Golgi transport (GO:0034498)	1	DEG_GSE131565
early endosome to late endosome transport (GO:0045022)	1	DEG_GSE179661_MHCC97H
epidermal growth factor receptor signaling pathway (GO:0007173)	1	DEG_GSE179661_MHCC97H
epidermis development (GO:0008544)	1	DEG_GSE131565
establishment of endothelial barrier (GO:0061028)	1	DEG_GSE179661_MHCC97H
establishment of protein localization (GO:0045184)	1	DEG_GSE179661_MHCC97H
establishment of protein localization to membrane (GO:0090150)	1	DEG_GSE179661_MHCC97H
establishment of skin barrier (GO:0061436)	1	DEG_GSE131565
exonucleolytic nuclear-transcribed mRNA catabolic process involved in deadenylation-dependent decay (GO:0043928)	1	DEG_GSE261716_CBD0.2_2d
fatty acid beta-oxidation using acyl-CoA oxidase (GO:0033540)	1	DEG_GSE261716_CBD0.2_28d
Fatty acid biosynthesis Homo sapiens hsa00061	1	DEG_GSE151512_24h
Fc-epsilon receptor signaling pathway (GO:0038095)	1	DEG_GSE261716_CBD0.2_2d
G1/S transition of mitotic cell cycle (GO:0000082)	1	DEG_GSE272113_sCBD
gluconeogenesis (GO:0006094)	1	DEG_GSE272113_sCBD
glutamate metabolic process (GO:0006536)	1	DEG_GSE272113_sCBD
glutathione biosynthetic process (GO:0006750)	1	DEG_GSE272113_sCBD
glutathione derivative biosynthetic process (GO:1901687)	1	DEG_GSE168797_SARS_CBDV
Glycosphingolipid biosynthesis - ganglio series Homo sapiens hsa00604	1	DEG_GSE168797_SARS_CBD
GnRH signaling pathway Homo sapiens hsa04912	1	DEG_GSE131565
Golgi ribbon formation (GO:0090161)	1	DEG_GSE168797_SARS_CBD
Herpes simplex infection Homo sapiens hsa05168	1	DEG_GSE179661_MHCC97H
high-density lipoprotein particle remodeling (GO:0034375)	1	DEG_GSE261716_CBD0.2_2d
Hippo signaling pathway Homo sapiens hsa04390	1	DEG_GSE179661_HepG2
histone H3-K9 demethylation (GO:0033169)	1	DEG_GSE201508_cGAMP
Influenza A Homo sapiens hsa05164	1	DEG_GSE168797_Mock_CBD
Inositol phosphate metabolism Homo sapiens hsa00562	1	DEG_GSE179661_HepG2
intracellular transport (GO:0046907)	1	DEG_GSE179661_MHCC97H
intraciliary transport involved in cilium assembly (GO:0035735)	1	DEG_GSE151512_6h
intrinsic apoptotic signaling pathway in response to DNA damage by p53 class mediator (GO:0042771)	1	DEG_GSE179661_MHCC97H
ion transmembrane transport (GO:0034220)	1	DEG_GSE201508_cGAMP
iron ion homeostasis (GO:0055072)	1	DEG_GSE168797_SARS_CBDV
JAK-STAT cascade (GO:0007259)	1	DEG_GSE179661_MHCC97H
JNK cascade (GO:0007254)	1	DEG_GSE179661_HepG2
keratinocyte differentiation (GO:0030216)	1	DEG_GSE131565
lamellipodium assembly (GO:0030032)	1	DEG_GSE179661_MHCC97H
linoleic acid metabolic process (GO:0043651)	1	DEG_GSE201508_enthanol
liver development (GO:0001889)	1	DEG_GSE179661_HepG2
Long-term depression Homo sapiens hsa04730	1	DEG_GSE131565
Lysine degradation Homo sapiens hsa00310	1	DEG_GSE261716_CBD0.2_28d
lysosome localization (GO:0032418)	1	DEG_GSE168797_Mock_CBD
lysosome organization (GO:0007040)	1	DEG_GSE272113_sCBD
Malaria Homo sapiens hsa05144	1	DEG_GSE235310_Veh
maturation of SSU-rRNA from tricistronic rRNA transcript (SSU-rRNA, 5.8S rRNA, LSU-rRNA) (GO:0000462)	1	DEG_GSE261716_CBD0.2_2d
Measles Homo sapiens hsa05162	1	DEG_GSE179661_MHCC97H
membrane protein intracellular domain proteolysis (GO:0031293)	1	DEG_GSE179661_HepG2
Metabolism of xenobiotics by cytochrome P450 Homo sapiens hsa00980	1	DEG_GSE168797_SARS_CBDV
microtubule cytoskeleton organization (GO:0000226)	1	DEG_GSE179661_MHCC97H
misfolded or incompletely synthesized protein catabolic process (GO:0006515)	1	DEG_GSE179661_MHCC97H
mitochondrial respiratory chain complex IV assembly (GO:0033617)	1	DEG_GSE261716_CBD0.2_2d
mitochondrial translation (GO:0032543)	1	DEG_GSE261716_CBD0.2_2d
mitotic metaphase plate congression (GO:0007080)	1	DEG_GSE179661_MHCC97H
mitotic nuclear envelope reassembly (GO:0007084)	1	DEG_GSE179661_HepG2
Morphine addiction Homo sapiens hsa05032	1	DEG_GSE168797_Mock_CBDV
mRNA 3'-end processing (GO:0031124)	1	DEG_GSE179661_MHCC97H
mRNA export from nucleus (GO:0006406)	1	DEG_GSE261716_CBD0.2_2d
mRNA surveillance pathway Homo sapiens hsa03015	1	DEG_GSE179661_MHCC97H
MyD88-dependent toll-like receptor signaling pathway (GO:0002755)	1	DEG_GSE201508_cGAMP
MyD88-independent toll-like receptor signaling pathway (GO:0002756)	1	DEG_GSE168797_SARS_CBD
natural killer cell mediated cytotoxicity (GO:0042267)	1	DEG_GSE168797_SARS_CBD
negative regulation of anoikis (GO:2000811)	1	DEG_GSE179661_MHCC97H
negative regulation of cell growth (GO:0030308)	1	DEG_GSE179661_HepG2
negative regulation of DNA damage response, signal transduction by p53 class mediator (GO:0043518)	1	DEG_GSE179661_MHCC97H
negative regulation of epidermal growth factor receptor signaling pathway (GO:0042059)	1	DEG_GSE179661_MHCC97H
negative regulation of ERK1 and ERK2 cascade (GO:0070373)	1	DEG_GSE272113_sCBD
negative regulation of extrinsic apoptotic signaling pathway via death domain receptors (GO:1902042)	1	DEG_GSE179661_HepG2
negative regulation of fibroblast proliferation (GO:0048147)	1	DEG_GSE272113_sCBD
negative regulation of G1/S transition of mitotic cell cycle (GO:2000134)	1	DEG_GSE179661_MHCC97H
negative regulation of glucocorticoid receptor signaling pathway (GO:2000323)	1	DEG_GSE179661_MHCC97H
negative regulation of I-kappaB kinase/NF-kappaB signaling (GO:0043124)	1	DEG_GSE179661_HepG2
negative regulation of NF-kappaB transcription factor activity (GO:0032088)	1	DEG_GSE179661_MHCC97H
negative regulation of NIK/NF-kappaB signaling (GO:1901223)	1	DEG_GSE179661_HepG2
negative regulation of peptidyl-serine phosphorylation (GO:0033137)	1	DEG_GSE179661_MHCC97H
negative regulation of peptidyl-threonine phosphorylation (GO:0010801)	1	DEG_GSE179661_HepG2
negative regulation of phosphorylation (GO:0042326)	1	DEG_GSE152088
negative regulation of proteasomal ubiquitin-dependent protein catabolic process (GO:0032435)	1	DEG_GSE179661_MHCC97H
negative regulation of protein phosphorylation (GO:0001933)	1	DEG_GSE179661_MHCC97H
negative regulation of protein ubiquitination (GO:0031397)	1	DEG_GSE179661_MHCC97H
negative regulation of sequestering of triglyceride (GO:0010891)	1	DEG_GSE131565
negative regulation of T cell receptor signaling pathway (GO:0050860)	1	DEG_GSE272113_sCBD
negative regulation of transforming growth factor beta receptor signaling pathway (GO:0030512)	1	DEG_GSE179661_MHCC97H
negative regulation of translational initiation (GO:0045947)	1	DEG_GSE179661_MHCC97H
negative regulation of ubiquitin protein ligase activity (GO:1904667)	1	DEG_GSE179661_MHCC97H
negative regulation of viral release from host cell (GO:1902187)	1	DEG_GSE179661_HepG2
neurotrophin TRK receptor signaling pathway (GO:0048011)	1	DEG_GSE131565
Notch signaling pathway Homo sapiens hsa04330	1	DEG_GSE179661_HepG2
nucleobase-containing compound metabolic process (GO:0006139)	1	DEG_GSE272113_sCBD
nucleobase-containing small molecule interconversion (GO:0015949)	1	DEG_GSE272113_sCBD
nucleophagy (GO:0044804)	1	DEG_GSE179661_MHCC97H
nucleotide-excision repair, DNA damage recognition (GO:0000715)	1	DEG_GSE168797_SARS_CBD
nucleus organization (GO:0006997)	1	DEG_GSE179661_MHCC97H
Other glycan degradation Homo sapiens hsa00511	1	DEG_GSE272113_sCBD
p53 signaling pathway Homo sapiens hsa04115	1	DEG_GSE261716_CBD0.2_28d
Pentose and glucuronate interconversions Homo sapiens hsa00040	1	DEG_GSE168797_SARS_CBDV
Pentose phosphate pathway Homo sapiens hsa00030	1	DEG_GSE272113_sCBD
pentose-phosphate shunt (GO:0006098)	1	DEG_GSE272113_sCBD
peptide cross-linking (GO:0018149)	1	DEG_GSE131565
peptidyl-serine dephosphorylation (GO:0070262)	1	DEG_GSE151512_24h
peptidyl-serine phosphorylation (GO:0018105)	1	DEG_GSE179661_MHCC97H
peptidyl-threonine phosphorylation (GO:0018107)	1	DEG_GSE179661_MHCC97H
peroxisome organization (GO:0007031)	1	DEG_GSE261716_CBD0.2_28d
phosphatidylcholine biosynthetic process (GO:0006656)	1	DEG_GSE261716_CBD0.2_2d
phosphatidylethanolamine biosynthetic process (GO:0006646)	1	DEG_GSE272113_sCBD
phospholipid efflux (GO:0033700)	1	DEG_GSE261716_CBD0.2_2d
PI3K-Akt signaling pathway Homo sapiens hsa04151	1	DEG_GSE272113_sCBD
positive chemotaxis (GO:0050918)	1	DEG_GSE272113_sCBD
positive regulation of cell cycle (GO:0045787)	1	DEG_GSE179661_MHCC97H
positive regulation of cell growth (GO:0030307)	1	DEG_GSE201508_enthanol
positive regulation of cell migration (GO:0030335)	1	DEG_GSE179661_HepG2
positive regulation of cholesterol efflux (GO:0010875)	1	DEG_GSE168797_Mock_CBD
positive regulation of cyclin-dependent protein serine/threonine kinase activity (GO:0045737)	1	DEG_GSE179661_MHCC97H
positive regulation of endothelial cell proliferation (GO:0001938)	1	DEG_GSE232624_EtOH0.75_CBD0.75_6h
positive regulation of epidermal growth factor receptor signaling pathway (GO:0045742)	1	DEG_GSE168797_SARS_CBD
positive regulation of erythrocyte differentiation (GO:0045648)	1	DEG_GSE179661_MHCC97H
positive regulation of exosomal secretion (GO:1903543)	1	DEG_GSE179661_MHCC97H
positive regulation of gene silencing by miRNA (GO:2000637)	1	DEG_GSE179661_MHCC97H
positive regulation of histone deacetylation (GO:0031065)	1	DEG_GSE179661_MHCC97H
positive regulation of interleukin-8 production (GO:0032757)	1	DEG_GSE272113_sCBD
positive regulation of intrinsic apoptotic signaling pathway (GO:2001244)	1	DEG_GSE179661_HepG2
positive regulation of mitochondrial outer membrane permeabilization involved in apoptotic signaling pathway (GO:1901030)	1	DEG_GSE179661_HepG2
positive regulation of neuron death (GO:1901216)	1	DEG_GSE168797_Mock_CBD
positive regulation of nitric oxide biosynthetic process (GO:0045429)	1	DEG_GSE179661_MHCC97H
positive regulation of osteoblast differentiation (GO:0045669)	1	DEG_GSE168797_Mock_CBDV
positive regulation of peptidyl-serine phosphorylation (GO:0033138)	1	DEG_GSE179661_MHCC97H
positive regulation of peptidyl-tyrosine phosphorylation (GO:0050731)	1	DEG_GSE272113_sCBD
positive regulation of protein binding (GO:0032092)	1	DEG_GSE179661_MHCC97H
positive regulation of protein catabolic process (GO:0045732)	1	DEG_GSE179661_MHCC97H
positive regulation of protein complex assembly (GO:0031334)	1	DEG_GSE272113_sCBD
positive regulation of protein homooligomerization (GO:0032464)	1	DEG_GSE131565
positive regulation of protein insertion into mitochondrial membrane involved in apoptotic signaling pathway (GO:1900740)	1	DEG_GSE179661_MHCC97H
positive regulation of protein localization to plasma membrane (GO:1903078)	1	DEG_GSE179661_MHCC97H
positive regulation of protein oligomerization (GO:0032461)	1	DEG_GSE179661_HepG2
positive regulation of protein ubiquitination (GO:0031398)	1	DEG_GSE179661_MHCC97H
positive regulation of sequence-specific DNA binding transcription factor activity (GO:0051091)	1	DEG_GSE179661_HepG2
positive regulation of telomerase activity (GO:0051973)	1	DEG_GSE179661_MHCC97H
positive regulation of TOR signaling (GO:0032008)	1	DEG_GSE179661_MHCC97H
positive regulation of transcription elongation from RNA polymerase II promoter (GO:0032968)	1	DEG_GSE179661_MHCC97H
positive regulation of translation (GO:0045727)	1	DEG_GSE179661_MHCC97H
positive regulation of viral transcription (GO:0050434)	1	DEG_GSE261716_CBD0.2_2d
post-Golgi vesicle-mediated transport (GO:0006892)	1	DEG_GSE179661_MHCC97H
Prostate cancer Homo sapiens hsa05215	1	DEG_GSE179661_MHCC97H
proteasome assembly (GO:0043248)	1	DEG_GSE168797_SARS_CBD
protein autophosphorylation (GO:0046777)	1	DEG_GSE179661_MHCC97H
protein K11-linked ubiquitination (GO:0070979)	1	DEG_GSE261716_CBD20_28d
protein K48-linked deubiquitination (GO:0071108)	1	DEG_GSE179661_MHCC97H
protein K69-linked ufmylation (GO:1990592)	1	DEG_GSE168797_SARS_CBD
protein localization to Golgi apparatus (GO:0034067)	1	DEG_GSE179661_MHCC97H
protein localization to plasma membrane (GO:0072659)	1	DEG_GSE131565
protein oligomerization (GO:0051259)	1	DEG_GSE151512_24h
protein targeting to membrane (GO:0006612)	1	DEG_GSE179661_MHCC97H
protein ufmylation (GO:0071569)	1	DEG_GSE168797_SARS_CBD
Proteoglycans in cancer Homo sapiens hsa05205	1	DEG_GSE272113_sCBD
proteolysis in other organism (GO:0035897)	1	DEG_GSE179661_HepG2
proton transport (GO:0015992)	1	DEG_GSE168797_SARS_CBDV
Pyrimidine metabolism Homo sapiens hsa00240	1	DEG_GSE272113_sCBD
Rap protein signal transduction (GO:0032486)	1	DEG_GSE179661_MHCC97H
Ras protein signal transduction (GO:0007265)	1	DEG_GSE179661_MHCC97H
Ras signaling pathway Homo sapiens hsa04014	1	DEG_GSE131565
receptor catabolic process (GO:0032801)	1	DEG_GSE272113_sCBD
regulation of apoptotic process (GO:0042981)	1	DEG_GSE179661_HepG2
regulation of autophagy (GO:0010506)	1	DEG_GSE179661_MHCC97H
Regulation of autophagy Homo sapiens hsa04140	1	DEG_GSE168797_SARS_CBD
regulation of cell proliferation (GO:0042127)	1	DEG_GSE179661_HepG2
regulation of cellular response to heat (GO:1900034)	1	DEG_GSE151512_6h
regulation of centrosome duplication (GO:0010824)	1	DEG_GSE179661_MHCC97H
regulation of cilium assembly (GO:1902017)	1	DEG_GSE179661_MHCC97H
regulation of circadian rhythm (GO:0042752)	1	DEG_GSE179661_MHCC97H
regulation of defense response to virus by virus (GO:0050690)	1	DEG_GSE179661_HepG2
regulation of extrinsic apoptotic signaling pathway via death domain receptors (GO:1902041)	1	DEG_GSE179661_HepG2
regulation of glycolytic process (GO:0006110)	1	DEG_GSE168797_SARS_CBD
regulation of Golgi organization (GO:1903358)	1	DEG_GSE179661_MHCC97H
regulation of insulin-like growth factor receptor signaling pathway (GO:0043567)	1	DEG_GSE179661_HepG2
regulation of intracellular estrogen receptor signaling pathway (GO:0033146)	1	DEG_GSE168797_SARS_CBD
regulation of protein phosphorylation (GO:0001932)	1	DEG_GSE179661_MHCC97H
regulation of sequence-specific DNA binding transcription factor activity (GO:0051090)	1	DEG_GSE201508_cGAMP
regulation of small GTPase mediated signal transduction (GO:0051056)	1	DEG_GSE179661_HepG2
regulation of transcription from RNA polymerase II promoter (GO:0006357)	1	DEG_GSE179661_MHCC97H
regulation of transforming growth factor beta receptor signaling pathway (GO:0017015)	1	DEG_GSE179661_HepG2
regulation of translational initiation (GO:0006446)	1	DEG_GSE168797_SARS_CBD
regulation of vesicle fusion (GO:0031338)	1	DEG_GSE131565
response to heat (GO:0009408)	1	DEG_GSE151512_6h
response to hormone (GO:0009725)	1	DEG_GSE168797_SARS_CBDV
response to interferon-beta (GO:0035456)	1	DEG_GSE235310_Veh
response to interferon-gamma (GO:0034341)	1	DEG_GSE168797_SARS_CBD
response to lipopolysaccharide (GO:0032496)	1	DEG_GSE179661_HepG2
response to virus (GO:0009615)	1	DEG_GSE235310_Veh
retinal metabolic process (GO:0042574)	1	DEG_GSE168797_SARS_CBDV
retinol metabolic process (GO:0042572)	1	DEG_GSE168797_SARS_CBD
retrograde transport, endosome to Golgi (GO:0042147)	1	DEG_GSE179661_MHCC97H
reverse cholesterol transport (GO:0043691)	1	DEG_GSE261716_CBD0.2_2d
Rho protein signal transduction (GO:0007266)	1	DEG_GSE179661_HepG2
ribosomal large subunit biogenesis (GO:0042273)	1	DEG_GSE261716_CBD20_2d
ribosomal small subunit biogenesis (GO:0042274)	1	DEG_GSE261716_CBD20_2d
RIG-I-like receptor signaling pathway Homo sapiens hsa04622	1	DEG_GSE179661_MHCC97H
RNA degradation Homo sapiens hsa03018	1	DEG_GSE272113_sCBD
RNA metabolic process (GO:0016070)	1	DEG_GSE261716_CBD0.2_2d
RNA splicing (GO:0008380)	1	DEG_GSE261716_CBD0.2_2d
Selenocompound metabolism Homo sapiens hsa00450	1	DEG_GSE272113_sCBD
Serotonergic synapse Homo sapiens hsa04726	1	DEG_GSE232624_EtOH0.25_CBD0.75_12h
signal transduction (GO:0007165)	1	DEG_GSE235310_Veh
sphingolipid biosynthetic process (GO:0030148)	1	DEG_GSE131565
Sphingolipid metabolism Homo sapiens hsa00600	1	DEG_GSE272113_sCBD
SRP-dependent cotranslational protein targeting to membrane, translocation (GO:0006616)	1	DEG_GSE179661_MHCC97H
steroid metabolic process (GO:0008202)	1	DEG_GSE168797_SARS_CBDV
Synaptic vesicle cycle Homo sapiens hsa04721	1	DEG_GSE201508_cGAMP
synaptic vesicle fusion to presynaptic active zone membrane (GO:0031629)	1	DEG_GSE179661_MHCC97H
termination of RNA polymerase I transcription (GO:0006363)	1	DEG_GSE261716_CBD0.2_2d
termination of RNA polymerase II transcription (GO:0006369)	1	DEG_GSE179661_MHCC97H
Tight junction Homo sapiens hsa04530	1	DEG_GSE131565
toll-like receptor 4 signaling pathway (GO:0034142)	1	DEG_GSE235310_Veh
Toll-like receptor signaling pathway Homo sapiens hsa04620	1	DEG_GSE272113_sCBD
TOR signaling (GO:0031929)	1	DEG_GSE179661_MHCC97H
transcription elongation from RNA polymerase I promoter (GO:0006362)	1	DEG_GSE261716_CBD20_28d
Transcriptional misregulation in cancer Homo sapiens hsa05202	1	DEG_GSE179661_MHCC97H
transforming growth factor beta receptor signaling pathway (GO:0007179)	1	DEG_GSE179661_HepG2
TRIF-dependent toll-like receptor signaling pathway (GO:0035666)	1	DEG_GSE179661_MHCC97H
triglyceride homeostasis (GO:0070328)	1	DEG_GSE261716_CBD0.2_2d
tRNA aminoacylation for protein translation (GO:0006418)	1	DEG_GSE272113_sCBD
tRNA modification (GO:0006400)	1	DEG_GSE272113_sCBD
Ubiquitin mediated proteolysis Homo sapiens hsa04120	1	DEG_GSE179661_MHCC97H
vacuolar acidification (GO:0007035)	1	DEG_GSE235310_Veh
vasculature development (GO:0001944)	1	DEG_GSE179661_HepG2
VEGF signaling pathway Homo sapiens hsa04370	1	DEG_GSE179661_HepG2
ventricular septum morphogenesis (GO:0060412)	1	DEG_GSE179661_MHCC97H
vesicle-mediated transport (GO:0016192)	1	DEG_GSE179661_MHCC97H
virion assembly (GO:0019068)	1	DEG_GSE179661_MHCC97H

## Sheet: CBD downregulated pathways
Term	Freq	Source
Cell cycle Homo sapiens hsa04110	10	DEG_GSE131565; DEG_GSE151512_12h; DEG_GSE151512_24h; DEG_GSE152088; DEG_GSE168797_Mock_CBD; DEG_GSE168797_SARS_CBD; DEG_GSE179661_HepG2; DEG_GSE179661_MHCC97H; DEG_GSE201508_cGAMP; DEG_GSE274859_LPS_24h
mRNA export from nucleus (GO:0006406)	10	DEG_GSE131565; DEG_GSE151512_12h; DEG_GSE151512_24h; DEG_GSE152088; DEG_GSE168797_Mock_CBD; DEG_GSE168797_SARS_CBD; DEG_GSE179661_HepG2; DEG_GSE179661_MHCC97H; DEG_GSE261716_CBD10_28d; DEG_GSE274859_LPS_24h
mRNA splicing, via spliceosome (GO:0000398)	10	DEG_GSE131565; DEG_GSE151512_12h; DEG_GSE151512_24h; DEG_GSE168797_Mock_CBD; DEG_GSE168797_SARS_CBD; DEG_GSE179661_HepG2; DEG_GSE179661_MHCC97H; DEG_GSE201508_cGAMP; DEG_GSE261716_CBD10_28d; DEG_GSE274859_LPS_24h
Pathways in cancer Homo sapiens hsa05200	10	DEG_GSE131565; DEG_GSE168797_Mock_CBD; DEG_GSE168797_SARS_CBD; DEG_GSE168797_SARS_CBDV; DEG_GSE179661_MHCC97H; DEG_GSE235310_LPS; DEG_GSE261716_CBD0.2_2d; DEG_GSE272113_CBD; DEG_GSE272113_sCBD; DEG_GSE274859_LPS_24h
DNA replication (GO:0006260)	9	DEG_GSE131565; DEG_GSE151512_12h; DEG_GSE151512_24h; DEG_GSE168797_Mock_CBD; DEG_GSE168797_SARS_CBD; DEG_GSE179661_HepG2; DEG_GSE179661_MHCC97H; DEG_GSE201508_cGAMP; DEG_GSE274859_LPS_24h
DNA replication Homo sapiens hsa03030	9	DEG_GSE131565; DEG_GSE151512_12h; DEG_GSE151512_24h; DEG_GSE168797_Mock_CBD; DEG_GSE168797_SARS_CBD; DEG_GSE179661_HepG2; DEG_GSE179661_MHCC97H; DEG_GSE201508_cGAMP; DEG_GSE274859_LPS_24h
Focal adhesion Homo sapiens hsa04510	9	DEG_GSE131565; DEG_GSE151512_6h; DEG_GSE168797_Mock_CBD; DEG_GSE168797_SARS_CBD; DEG_GSE179661_MHCC97H; DEG_GSE261716_CBD0.2_2d; DEG_GSE272113_CBD; DEG_GSE272113_sCBD; DEG_GSE274859_LPS_24h
G1/S transition of mitotic cell cycle (GO:0000082)	9	DEG_GSE131565; DEG_GSE151512_12h; DEG_GSE151512_24h; DEG_GSE168797_Mock_CBD; DEG_GSE168797_SARS_CBD; DEG_GSE179661_HepG2; DEG_GSE179661_MHCC97H; DEG_GSE201508_cGAMP; DEG_GSE274859_LPS_24h
p53 signaling pathway Homo sapiens hsa04115	9	DEG_GSE131565; DEG_GSE152088; DEG_GSE179661_HepG2; DEG_GSE179661_MHCC97H; DEG_GSE201508_cGAMP; DEG_GSE235310_LPS; DEG_GSE272113_CBD; DEG_GSE272113_sCBD; DEG_GSE274859_LPS_24h
Mismatch repair Homo sapiens hsa03430	8	DEG_GSE131565; DEG_GSE151512_12h; DEG_GSE151512_24h; DEG_GSE168797_Mock_CBD; DEG_GSE168797_SARS_CBD; DEG_GSE179661_HepG2; DEG_GSE179661_MHCC97H; DEG_GSE274859_LPS_24h
mitotic cell cycle (GO:0000278)	8	DEG_GSE131565; DEG_GSE151512_12h; DEG_GSE151512_24h; DEG_GSE151512_6h; DEG_GSE168797_Mock_CBD; DEG_GSE168797_SARS_CBD; DEG_GSE179661_HepG2; DEG_GSE274859_LPS_24h
positive regulation of transcription, DNA-templated (GO:0045893)	8	DEG_GSE151512_12h; DEG_GSE151512_24h; DEG_GSE151512_3h; DEG_GSE168797_Mock_CBD; DEG_GSE168797_Mock_CBDV; DEG_GSE168797_SARS_CBD; DEG_GSE261716_CBD10_28d; DEG_GSE272113_sCBD
protein sumoylation (GO:0016925)	8	DEG_GSE131565; DEG_GSE151512_12h; DEG_GSE151512_24h; DEG_GSE152088; DEG_GSE168797_Mock_CBD; DEG_GSE168797_SARS_CBD; DEG_GSE179661_HepG2; DEG_GSE274859_LPS_24h
Proteoglycans in cancer Homo sapiens hsa05205	8	DEG_GSE131565; DEG_GSE168797_Mock_CBD; DEG_GSE168797_SARS_CBD; DEG_GSE179661_MHCC97H; DEG_GSE261716_CBD0.2_2d; DEG_GSE272113_CBD; DEG_GSE272113_sCBD; DEG_GSE274859_LPS_24h
Pyrimidine metabolism Homo sapiens hsa00240	8	DEG_GSE131565; DEG_GSE151512_24h; DEG_GSE168797_Mock_CBD; DEG_GSE168797_SARS_CBD; DEG_GSE179661_HepG2; DEG_GSE179661_MHCC97H; DEG_GSE201508_cGAMP; DEG_GSE274859_LPS_24h
RNA transport Homo sapiens hsa03013	8	DEG_GSE131565; DEG_GSE151512_24h; DEG_GSE152088; DEG_GSE168797_Mock_CBD; DEG_GSE168797_SARS_CBD; DEG_GSE179661_HepG2; DEG_GSE179661_MHCC97H; DEG_GSE274859_LPS_24h
sister chromatid cohesion (GO:0007062)	8	DEG_GSE131565; DEG_GSE151512_12h; DEG_GSE151512_24h; DEG_GSE152088; DEG_GSE168797_Mock_CBD; DEG_GSE168797_SARS_CBD; DEG_GSE179661_HepG2; DEG_GSE274859_LPS_24h
Spliceosome Homo sapiens hsa03040	8	DEG_GSE131565; DEG_GSE151512_12h; DEG_GSE151512_24h; DEG_GSE168797_Mock_CBD; DEG_GSE179661_MHCC97H; DEG_GSE201508_cGAMP; DEG_GSE261716_CBD10_28d; DEG_GSE274859_LPS_24h
AGE-RAGE signaling pathway in diabetic complications Homo sapiens hsa04933	7	DEG_GSE131565; DEG_GSE168797_SARS_CBD; DEG_GSE168797_SARS_CBDV; DEG_GSE179661_MHCC97H; DEG_GSE201508_enthanol; DEG_GSE272113_sCBD; DEG_GSE274859_LPS_24h
Apoptosis Homo sapiens hsa04210	7	DEG_GSE151512_12h; DEG_GSE168797_Mock_CBD; DEG_GSE179661_MHCC97H; DEG_GSE201508_cGAMP; DEG_GSE235310_LPS; DEG_GSE235310_Veh; DEG_GSE274859_LPS_24h
Base excision repair Homo sapiens hsa03410	7	DEG_GSE131565; DEG_GSE151512_24h; DEG_GSE168797_Mock_CBD; DEG_GSE168797_SARS_CBD; DEG_GSE179661_MHCC97H; DEG_GSE201508_cGAMP; DEG_GSE274859_LPS_24h
Carbon metabolism Homo sapiens hsa01200	7	DEG_GSE131565; DEG_GSE168797_Mock_CBD; DEG_GSE179661_HepG2; DEG_GSE179661_MHCC97H; DEG_GSE261716_CBD20_28d; DEG_GSE274435_DMSO_24h; DEG_GSE274859_LPS_24h
Chronic myeloid leukemia Homo sapiens hsa05220	7	DEG_GSE151512_12h; DEG_GSE151512_6h; DEG_GSE168797_Mock_CBD; DEG_GSE168797_SARS_CBD; DEG_GSE179661_MHCC97H; DEG_GSE272113_sCBD; DEG_GSE274859_LPS_24h
Colorectal cancer Homo sapiens hsa05210	7	DEG_GSE151512_12h; DEG_GSE168797_Mock_CBD; DEG_GSE168797_SARS_CBD; DEG_GSE179661_MHCC97H; DEG_GSE261716_CBD0.2_2d; DEG_GSE272113_sCBD; DEG_GSE274859_LPS_24h
DNA damage response, detection of DNA damage (GO:0042769)	7	DEG_GSE131565; DEG_GSE151512_12h; DEG_GSE151512_24h; DEG_GSE168797_Mock_CBD; DEG_GSE168797_SARS_CBD; DEG_GSE179661_HepG2; DEG_GSE274859_LPS_24h
DNA damage response, signal transduction by p53 class mediator resulting in cell cycle arrest (GO:0006977)	7	DEG_GSE131565; DEG_GSE151512_12h; DEG_GSE151512_24h; DEG_GSE168797_Mock_CBD; DEG_GSE168797_SARS_CBD; DEG_GSE179661_HepG2; DEG_GSE274859_LPS_24h
DNA recombination (GO:0006310)	7	DEG_GSE131565; DEG_GSE151512_12h; DEG_GSE151512_24h; DEG_GSE168797_Mock_CBD; DEG_GSE168797_SARS_CBD; DEG_GSE179661_HepG2; DEG_GSE274859_LPS_24h
DNA replication initiation (GO:0006270)	7	DEG_GSE131565; DEG_GSE168797_Mock_CBD; DEG_GSE168797_SARS_CBD; DEG_GSE179661_HepG2; DEG_GSE179661_MHCC97H; DEG_GSE201508_cGAMP; DEG_GSE274859_LPS_24h
DNA synthesis involved in DNA repair (GO:0000731)	7	DEG_GSE131565; DEG_GSE151512_24h; DEG_GSE168797_Mock_CBD; DEG_GSE168797_SARS_CBD; DEG_GSE179661_HepG2; DEG_GSE179661_MHCC97H; DEG_GSE274859_LPS_24h
double-strand break repair via homologous recombination (GO:0000724)	7	DEG_GSE131565; DEG_GSE151512_24h; DEG_GSE168797_Mock_CBD; DEG_GSE168797_SARS_CBD; DEG_GSE179661_HepG2; DEG_GSE179661_MHCC97H; DEG_GSE274859_LPS_24h
G2/M transition of mitotic cell cycle (GO:0000086)	7	DEG_GSE131565; DEG_GSE151512_12h; DEG_GSE151512_24h; DEG_GSE168797_Mock_CBD; DEG_GSE168797_SARS_CBD; DEG_GSE179661_HepG2; DEG_GSE274859_LPS_24h
Insulin signaling pathway Homo sapiens hsa04910	7	DEG_GSE151512_12h; DEG_GSE168797_Mock_CBD; DEG_GSE168797_SARS_CBD; DEG_GSE179661_MHCC97H; DEG_GSE261716_CBD0.2_2d; DEG_GSE261716_CBD20_2d; DEG_GSE274859_LPS_24h
Metabolic pathways Homo sapiens hsa01100	7	DEG_GSE131565; DEG_GSE168797_Mock_CBD; DEG_GSE179661_HepG2; DEG_GSE179661_MHCC97H; DEG_GSE261716_CBD20_28d; DEG_GSE274435_DMSO_24h; DEG_GSE274859_LPS_24h
mitotic cytokinesis (GO:0000281)	7	DEG_GSE131565; DEG_GSE151512_12h; DEG_GSE151512_24h; DEG_GSE168797_Mock_CBD; DEG_GSE168797_SARS_CBD; DEG_GSE179661_HepG2; DEG_GSE274859_LPS_24h
mitotic metaphase plate congression (GO:0007080)	7	DEG_GSE131565; DEG_GSE151512_12h; DEG_GSE151512_24h; DEG_GSE168797_Mock_CBD; DEG_GSE168797_SARS_CBD; DEG_GSE201508_cGAMP; DEG_GSE274859_LPS_24h
mitotic nuclear envelope disassembly (GO:0007077)	7	DEG_GSE131565; DEG_GSE152088; DEG_GSE168797_Mock_CBD; DEG_GSE168797_SARS_CBD; DEG_GSE179661_HepG2; DEG_GSE179661_MHCC97H; DEG_GSE274859_LPS_24h
mitotic sister chromatid segregation (GO:0000070)	7	DEG_GSE131565; DEG_GSE151512_12h; DEG_GSE151512_24h; DEG_GSE168797_Mock_CBD; DEG_GSE168797_SARS_CBD; DEG_GSE179661_HepG2; DEG_GSE274859_LPS_24h
mRNA 3'-end processing (GO:0031124)	7	DEG_GSE131565; DEG_GSE151512_12h; DEG_GSE151512_24h; DEG_GSE168797_Mock_CBD; DEG_GSE179661_HepG2; DEG_GSE261716_CBD10_28d; DEG_GSE274859_LPS_24h
negative regulation of transcription, DNA-templated (GO:0045892)	7	DEG_GSE151512_12h; DEG_GSE151512_24h; DEG_GSE168797_Mock_CBD; DEG_GSE168797_SARS_CBD; DEG_GSE168797_SARS_CBDV; DEG_GSE272113_sCBD; DEG_GSE274859_LPS_24h
Oocyte meiosis Homo sapiens hsa04114	7	DEG_GSE151512_12h; DEG_GSE151512_24h; DEG_GSE168797_Mock_CBD; DEG_GSE168797_SARS_CBD; DEG_GSE179661_HepG2; DEG_GSE179661_MHCC97H; DEG_GSE274859_LPS_24h
Pancreatic cancer Homo sapiens hsa05212	7	DEG_GSE168797_Mock_CBD; DEG_GSE168797_SARS_CBD; DEG_GSE179661_MHCC97H; DEG_GSE235310_LPS; DEG_GSE261716_CBD0.2_2d; DEG_GSE272113_sCBD; DEG_GSE274859_LPS_24h
Rap1 signaling pathway Homo sapiens hsa04015	7	DEG_GSE168797_Mock_CBD; DEG_GSE168797_SARS_CBD; DEG_GSE179661_MHCC97H; DEG_GSE261716_CBD0.2_2d; DEG_GSE272113_CBD; DEG_GSE272113_sCBD; DEG_GSE274859_LPS_24h
Regulation of actin cytoskeleton Homo sapiens hsa04810	7	DEG_GSE168797_Mock_CBD; DEG_GSE168797_SARS_CBD; DEG_GSE179661_MHCC97H; DEG_GSE261716_CBD0.2_2d; DEG_GSE272113_CBD; DEG_GSE272113_sCBD; DEG_GSE274859_LPS_24h
regulation of gene silencing by miRNA (GO:0060964)	7	DEG_GSE131565; DEG_GSE151512_24h; DEG_GSE152088; DEG_GSE168797_Mock_CBD; DEG_GSE168797_SARS_CBD; DEG_GSE179661_MHCC97H; DEG_GSE274859_LPS_24h
regulation of transcription involved in G1/S transition of mitotic cell cycle (GO:0000083)	7	DEG_GSE131565; DEG_GSE151512_12h; DEG_GSE151512_24h; DEG_GSE168797_Mock_CBD; DEG_GSE168797_SARS_CBD; DEG_GSE179661_HepG2; DEG_GSE274859_LPS_24h
RNA splicing (GO:0008380)	7	DEG_GSE131565; DEG_GSE151512_12h; DEG_GSE151512_24h; DEG_GSE152088; DEG_GSE168797_Mock_CBD; DEG_GSE179661_MHCC97H; DEG_GSE274859_LPS_24h
telomere maintenance via recombination (GO:0000722)	7	DEG_GSE131565; DEG_GSE151512_24h; DEG_GSE168797_Mock_CBD; DEG_GSE168797_SARS_CBD; DEG_GSE179661_HepG2; DEG_GSE179661_MHCC97H; DEG_GSE274859_LPS_24h
termination of RNA polymerase II transcription (GO:0006369)	7	DEG_GSE131565; DEG_GSE151512_12h; DEG_GSE151512_24h; DEG_GSE168797_Mock_CBD; DEG_GSE179661_HepG2; DEG_GSE261716_CBD10_28d; DEG_GSE274859_LPS_24h
translesion synthesis (GO:0019985)	7	DEG_GSE131565; DEG_GSE151512_12h; DEG_GSE151512_24h; DEG_GSE168797_Mock_CBD; DEG_GSE168797_SARS_CBD; DEG_GSE179661_HepG2; DEG_GSE274859_LPS_24h
tRNA export from nucleus (GO:0006409)	7	DEG_GSE131565; DEG_GSE152088; DEG_GSE168797_Mock_CBD; DEG_GSE168797_SARS_CBD; DEG_GSE179661_HepG2; DEG_GSE179661_MHCC97H; DEG_GSE274859_LPS_24h
viral process (GO:0016032)	7	DEG_GSE131565; DEG_GSE152088; DEG_GSE168797_Mock_CBD; DEG_GSE168797_SARS_CBD; DEG_GSE179661_HepG2; DEG_GSE179661_MHCC97H; DEG_GSE274859_LPS_24h
Arrhythmogenic right ventricular cardiomyopathy (ARVC) Homo sapiens hsa05412	6	DEG_GSE131565; DEG_GSE168797_Mock_CBD; DEG_GSE168797_SARS_CBD; DEG_GSE179661_MHCC97H; DEG_GSE272113_CBD; DEG_GSE272113_sCBD
Axon guidance Homo sapiens hsa04360	6	DEG_GSE151512_6h; DEG_GSE168797_Mock_CBD; DEG_GSE168797_SARS_CBD; DEG_GSE235310_LPS; DEG_GSE272113_CBD; DEG_GSE272113_sCBD
canonical glycolysis (GO:0061621)	6	DEG_GSE151512_12h; DEG_GSE151512_24h; DEG_GSE151512_6h; DEG_GSE179661_MHCC97H; DEG_GSE274435_DMSO_24h; DEG_GSE274859_LPS_24h
cellular response to DNA damage stimulus (GO:0006974)	6	DEG_GSE131565; DEG_GSE152088; DEG_GSE168797_Mock_CBD; DEG_GSE168797_SARS_CBD; DEG_GSE179661_HepG2; DEG_GSE274859_LPS_24h
Central carbon metabolism in cancer Homo sapiens hsa05230	6	DEG_GSE168797_Mock_CBD; DEG_GSE179661_MHCC97H; DEG_GSE261716_CBD0.2_2d; DEG_GSE261716_CBD20_2d; DEG_GSE274435_DMSO_24h; DEG_GSE274859_LPS_24h
Dilated cardiomyopathy Homo sapiens hsa05414	6	DEG_GSE168797_Mock_CBD; DEG_GSE168797_SARS_CBD; DEG_GSE179661_MHCC97H; DEG_GSE272113_CBD; DEG_GSE272113_sCBD; DEG_GSE274859_LPS_24h
DNA repair (GO:0006281)	6	DEG_GSE131565; DEG_GSE151512_24h; DEG_GSE168797_Mock_CBD; DEG_GSE168797_SARS_CBD; DEG_GSE179661_HepG2; DEG_GSE274859_LPS_24h
double-strand break repair (GO:0006302)	6	DEG_GSE131565; DEG_GSE152088; DEG_GSE168797_Mock_CBD; DEG_GSE168797_SARS_CBD; DEG_GSE179661_HepG2; DEG_GSE274859_LPS_24h
extracellular matrix organization (GO:0030198)	6	DEG_GSE131565; DEG_GSE168797_SARS_CBD; DEG_GSE168797_SARS_CBDV; DEG_GSE179661_MHCC97H; DEG_GSE272113_CBD; DEG_GSE272113_sCBD
Fanconi anemia pathway Homo sapiens hsa03460	6	DEG_GSE131565; DEG_GSE168797_Mock_CBD; DEG_GSE168797_SARS_CBD; DEG_GSE179661_HepG2; DEG_GSE179661_MHCC97H; DEG_GSE274859_LPS_24h
Hepatitis B Homo sapiens hsa05161	6	DEG_GSE151512_12h; DEG_GSE151512_24h; DEG_GSE179661_MHCC97H; DEG_GSE235310_LPS; DEG_GSE261716_CBD0.2_2d; DEG_GSE274859_LPS_24h
Homologous recombination Homo sapiens hsa03440	6	DEG_GSE131565; DEG_GSE168797_Mock_CBD; DEG_GSE168797_SARS_CBD; DEG_GSE179661_HepG2; DEG_GSE179661_MHCC97H; DEG_GSE274859_LPS_24h
interstrand cross-link repair (GO:0036297)	6	DEG_GSE131565; DEG_GSE151512_24h; DEG_GSE168797_Mock_CBD; DEG_GSE168797_SARS_CBD; DEG_GSE179661_HepG2; DEG_GSE274859_LPS_24h
mismatch repair (GO:0006298)	6	DEG_GSE131565; DEG_GSE151512_24h; DEG_GSE168797_Mock_CBD; DEG_GSE168797_SARS_CBD; DEG_GSE179661_HepG2; DEG_GSE274859_LPS_24h
mitochondrial electron transport, NADH to ubiquinone (GO:0006120)	6	DEG_GSE131565; DEG_GSE151512_24h; DEG_GSE168797_Mock_CBD; DEG_GSE179661_HepG2; DEG_GSE179661_MHCC97H; DEG_GSE272113_CBD
mitochondrial respiratory chain complex I assembly (GO:0032981)	6	DEG_GSE131565; DEG_GSE151512_24h; DEG_GSE168797_Mock_CBD; DEG_GSE179661_HepG2; DEG_GSE179661_MHCC97H; DEG_GSE272113_CBD
Nucleotide excision repair Homo sapiens hsa03420	6	DEG_GSE131565; DEG_GSE151512_24h; DEG_GSE168797_Mock_CBD; DEG_GSE168797_SARS_CBD; DEG_GSE179661_HepG2; DEG_GSE274859_LPS_24h
nucleotide-excision repair, DNA gap filling (GO:0006297)	6	DEG_GSE131565; DEG_GSE151512_24h; DEG_GSE168797_Mock_CBD; DEG_GSE168797_SARS_CBD; DEG_GSE179661_HepG2; DEG_GSE274859_LPS_24h
PI3K-Akt signaling pathway Homo sapiens hsa04151	6	DEG_GSE179661_MHCC97H; DEG_GSE261716_CBD0.2_2d; DEG_GSE261716_CBD20_28d; DEG_GSE272113_CBD; DEG_GSE272113_sCBD; DEG_GSE274859_LPS_24h
positive regulation of transcription from RNA polymerase II promoter (GO:0045944)	6	DEG_GSE168797_Mock_CBD; DEG_GSE168797_SARS_CBD; DEG_GSE168797_SARS_CBDV; DEG_GSE266113_mutNdufs4; DEG_GSE272113_sCBD; DEG_GSE274859_LPS_24h
Purine metabolism Homo sapiens hsa00230	6	DEG_GSE131565; DEG_GSE168797_Mock_CBD; DEG_GSE168797_SARS_CBD; DEG_GSE179661_HepG2; DEG_GSE179661_MHCC97H; DEG_GSE274859_LPS_24h
regulation of signal transduction by p53 class mediator (GO:1901796)	6	DEG_GSE131565; DEG_GSE151512_24h; DEG_GSE168797_Mock_CBD; DEG_GSE168797_SARS_CBD; DEG_GSE179661_HepG2; DEG_GSE274859_LPS_24h
regulation of ubiquitin-protein ligase activity involved in mitotic cell cycle (GO:0051439)	6	DEG_GSE131565; DEG_GSE151512_24h; DEG_GSE168797_Mock_CBD; DEG_GSE168797_SARS_CBD; DEG_GSE179661_HepG2; DEG_GSE274859_LPS_24h
Renal cell carcinoma Homo sapiens hsa05211	6	DEG_GSE151512_12h; DEG_GSE151512_24h; DEG_GSE151512_6h; DEG_GSE168797_Mock_CBD; DEG_GSE261716_CBD0.2_2d; DEG_GSE274859_LPS_24h
RNA export from nucleus (GO:0006405)	6	DEG_GSE131565; DEG_GSE151512_12h; DEG_GSE151512_24h; DEG_GSE152088; DEG_GSE168797_Mock_CBD; DEG_GSE261716_CBD10_28d
RNA metabolic process (GO:0016070)	6	DEG_GSE131565; DEG_GSE151512_12h; DEG_GSE151512_24h; DEG_GSE168797_Mock_CBD; DEG_GSE179661_MHCC97H; DEG_GSE274859_LPS_24h
Small cell lung cancer Homo sapiens hsa05222	6	DEG_GSE131565; DEG_GSE168797_Mock_CBD; DEG_GSE168797_SARS_CBD; DEG_GSE179661_MHCC97H; DEG_GSE272113_sCBD; DEG_GSE274859_LPS_24h
strand displacement (GO:0000732)	6	DEG_GSE131565; DEG_GSE168797_Mock_CBD; DEG_GSE168797_SARS_CBD; DEG_GSE179661_HepG2; DEG_GSE179661_MHCC97H; DEG_GSE274859_LPS_24h
telomere maintenance (GO:0000723)	6	DEG_GSE131565; DEG_GSE168797_Mock_CBD; DEG_GSE168797_SARS_CBD; DEG_GSE179661_HepG2; DEG_GSE179661_MHCC97H; DEG_GSE274859_LPS_24h
Bacterial invasion of epithelial cells Homo sapiens hsa05100	5	DEG_GSE168797_Mock_CBD; DEG_GSE179661_MHCC97H; DEG_GSE272113_CBD; DEG_GSE272113_sCBD; DEG_GSE274859_LPS_24h
CENP-A containing nucleosome assembly (GO:0034080)	5	DEG_GSE131565; DEG_GSE168797_Mock_CBD; DEG_GSE168797_SARS_CBD; DEG_GSE179661_HepG2; DEG_GSE274859_LPS_24h
centrosome cycle (GO:0007098)	5	DEG_GSE131565; DEG_GSE152088; DEG_GSE168797_Mock_CBD; DEG_GSE179661_HepG2; DEG_GSE274859_LPS_24h
chromatin remodeling (GO:0006338)	5	DEG_GSE151512_24h; DEG_GSE168797_Mock_CBD; DEG_GSE168797_SARS_CBD; DEG_GSE179661_HepG2; DEG_GSE274859_LPS_24h
chromosome segregation (GO:0007059)	5	DEG_GSE131565; DEG_GSE168797_Mock_CBD; DEG_GSE168797_SARS_CBD; DEG_GSE179661_HepG2; DEG_GSE274859_LPS_24h
ciliary basal body docking (GO:0097711)	5	DEG_GSE131565; DEG_GSE168797_Mock_CBD; DEG_GSE168797_SARS_CBD; DEG_GSE179661_HepG2; DEG_GSE274859_LPS_24h
Gap junction Homo sapiens hsa04540	5	DEG_GSE168797_Mock_CBD; DEG_GSE168797_SARS_CBD; DEG_GSE261716_CBD20_28d; DEG_GSE272113_CBD; DEG_GSE274859_LPS_24h
Glycolysis / Gluconeogenesis Homo sapiens hsa00010	5	DEG_GSE168797_Mock_CBD; DEG_GSE179661_MHCC97H; DEG_GSE201508_cGAMP; DEG_GSE274435_DMSO_24h; DEG_GSE274859_LPS_24h
Hippo signaling pathway Homo sapiens hsa04390	5	DEG_GSE131565; DEG_GSE168797_Mock_CBD; DEG_GSE168797_SARS_CBD; DEG_GSE272113_CBD; DEG_GSE272113_sCBD
HTLV-I infection Homo sapiens hsa05166	5	DEG_GSE168797_Mock_CBD; DEG_GSE168797_SARS_CBD; DEG_GSE179661_MHCC97H; DEG_GSE272113_sCBD; DEG_GSE274859_LPS_24h
Huntington's disease Homo sapiens hsa05016	5	DEG_GSE131565; DEG_GSE151512_24h; DEG_GSE168797_Mock_CBD; DEG_GSE179661_MHCC97H; DEG_GSE272113_CBD
Hypertrophic cardiomyopathy (HCM) Homo sapiens hsa05410	5	DEG_GSE168797_SARS_CBD; DEG_GSE179661_MHCC97H; DEG_GSE272113_CBD; DEG_GSE272113_sCBD; DEG_GSE274859_LPS_24h
Leukocyte transendothelial migration Homo sapiens hsa04670	5	DEG_GSE168797_Mock_CBD; DEG_GSE201508_cGAMP; DEG_GSE272113_CBD; DEG_GSE272113_sCBD; DEG_GSE274859_LPS_24h
Lysine degradation Homo sapiens hsa00310	5	DEG_GSE131565; DEG_GSE168797_Mock_CBD; DEG_GSE168797_SARS_CBD; DEG_GSE179661_MHCC97H; DEG_GSE274859_LPS_24h
negative regulation of transcription from RNA polymerase II promoter (GO:0000122)	5	DEG_GSE168797_Mock_CBD; DEG_GSE168797_SARS_CBD; DEG_GSE168797_SARS_CBDV; DEG_GSE266113_mutNdufs4; DEG_GSE274859_LPS_24h
nucleotide-excision repair, DNA incision (GO:0033683)	5	DEG_GSE131565; DEG_GSE168797_Mock_CBD; DEG_GSE168797_SARS_CBD; DEG_GSE179661_HepG2; DEG_GSE274859_LPS_24h
nucleotide-excision repair, DNA incision, 5'-to lesion (GO:0006296)	5	DEG_GSE131565; DEG_GSE168797_Mock_CBD; DEG_GSE168797_SARS_CBD; DEG_GSE179661_HepG2; DEG_GSE274859_LPS_24h
Pathogenic Escherichia coli infection Homo sapiens hsa05130	5	DEG_GSE168797_Mock_CBD; DEG_GSE235310_LPS; DEG_GSE235310_Veh; DEG_GSE261716_CBD0.2_28d; DEG_GSE274859_LPS_24h
positive regulation of apoptotic process (GO:0043065)	5	DEG_GSE151512_12h; DEG_GSE151512_24h; DEG_GSE272113_CBD; DEG_GSE272113_sCBD; DEG_GSE274859_LPS_24h
positive regulation of DNA-directed DNA polymerase activity (GO:1900264)	5	DEG_GSE131565; DEG_GSE168797_Mock_CBD; DEG_GSE168797_SARS_CBD; DEG_GSE179661_HepG2; DEG_GSE274859_LPS_24h
Progesterone-mediated oocyte maturation Homo sapiens hsa04914	5	DEG_GSE168797_Mock_CBD; DEG_GSE168797_SARS_CBD; DEG_GSE179661_HepG2; DEG_GSE179661_MHCC97H; DEG_GSE274859_LPS_24h
regulation of attachment of spindle microtubules to kinetochore (GO:0051988)	5	DEG_GSE151512_24h; DEG_GSE168797_Mock_CBD; DEG_GSE168797_SARS_CBD; DEG_GSE179661_MHCC97H; DEG_GSE274859_LPS_24h
regulation of cell cycle (GO:0051726)	5	DEG_GSE151512_12h; DEG_GSE151512_24h; DEG_GSE168797_Mock_CBD; DEG_GSE168797_SARS_CBD; DEG_GSE274859_LPS_24h
regulation of cellular response to heat (GO:1900034)	5	DEG_GSE131565; DEG_GSE151512_24h; DEG_GSE152088; DEG_GSE168797_SARS_CBD; DEG_GSE274859_LPS_24h
regulation of glucose transport (GO:0010827)	5	DEG_GSE131565; DEG_GSE152088; DEG_GSE168797_Mock_CBD; DEG_GSE168797_SARS_CBD; DEG_GSE179661_MHCC97H
replication fork processing (GO:0031297)	5	DEG_GSE131565; DEG_GSE168797_Mock_CBD; DEG_GSE168797_SARS_CBD; DEG_GSE179661_HepG2; DEG_GSE274859_LPS_24h
spindle organization (GO:0007051)	5	DEG_GSE131565; DEG_GSE168797_Mock_CBD; DEG_GSE168797_SARS_CBD; DEG_GSE179661_HepG2; DEG_GSE274859_LPS_24h
Thyroid hormone signaling pathway Homo sapiens hsa04919	5	DEG_GSE168797_Mock_CBD; DEG_GSE168797_SARS_CBD; DEG_GSE179661_MHCC97H; DEG_GSE261716_CBD0.2_2d; DEG_GSE274859_LPS_24h
transcription-coupled nucleotide-excision repair (GO:0006283)	5	DEG_GSE131565; DEG_GSE151512_24h; DEG_GSE168797_Mock_CBD; DEG_GSE179661_HepG2; DEG_GSE274859_LPS_24h
Alzheimer's disease Homo sapiens hsa05010	4	DEG_GSE131565; DEG_GSE151512_24h; DEG_GSE179661_MHCC97H; DEG_GSE272113_CBD
AMPK signaling pathway Homo sapiens hsa04152	4	DEG_GSE179661_MHCC97H; DEG_GSE261716_CBD20_28d; DEG_GSE261716_CBD20_2d; DEG_GSE272113_sCBD
centrosome duplication (GO:0051298)	4	DEG_GSE168797_Mock_CBD; DEG_GSE168797_SARS_CBD; DEG_GSE179661_HepG2; DEG_GSE274859_LPS_24h
cholesterol biosynthetic process (GO:0006695)	4	DEG_GSE179661_MHCC97H; DEG_GSE235310_LPS; DEG_GSE235310_Veh; DEG_GSE274859_LPS_24h
Citrate cycle (TCA cycle) Homo sapiens hsa00020	4	DEG_GSE131565; DEG_GSE168797_Mock_CBD; DEG_GSE179661_MHCC97H; DEG_GSE272113_CBD
cytoskeleton organization (GO:0007010)	4	DEG_GSE168797_Mock_CBD; DEG_GSE168797_SARS_CBD; DEG_GSE235310_Veh; DEG_GSE272113_sCBD
DNA double-strand break processing (GO:0000729)	4	DEG_GSE131565; DEG_GSE168797_Mock_CBD; DEG_GSE179661_HepG2; DEG_GSE274859_LPS_24h
DNA ligation (GO:0006266)	4	DEG_GSE131565; DEG_GSE168797_Mock_CBD; DEG_GSE168797_SARS_CBD; DEG_GSE274859_LPS_24h
DNA strand elongation involved in DNA replication (GO:0006271)	4	DEG_GSE131565; DEG_GSE168797_Mock_CBD; DEG_GSE168797_SARS_CBD; DEG_GSE179661_HepG2
ECM-receptor interaction Homo sapiens hsa04512	4	DEG_GSE131565; DEG_GSE179661_MHCC97H; DEG_GSE272113_CBD; DEG_GSE272113_sCBD
establishment of mitotic spindle orientation (GO:0000132)	4	DEG_GSE151512_12h; DEG_GSE168797_Mock_CBD; DEG_GSE168797_SARS_CBD; DEG_GSE274859_LPS_24h
fatty acid beta-oxidation (GO:0006635)	4	DEG_GSE131565; DEG_GSE179661_HepG2; DEG_GSE179661_MHCC97H; DEG_GSE272113_CBD
Fatty acid metabolism Homo sapiens hsa01212	4	DEG_GSE131565; DEG_GSE179661_HepG2; DEG_GSE179661_MHCC97H; DEG_GSE274859_LPS_24h
G-quadruplex DNA unwinding (GO:0044806)	4	DEG_GSE168797_Mock_CBD; DEG_GSE168797_SARS_CBD; DEG_GSE179661_HepG2; DEG_GSE274859_LPS_24h
histone mRNA metabolic process (GO:0008334)	4	DEG_GSE131565; DEG_GSE151512_24h; DEG_GSE179661_HepG2; DEG_GSE274859_LPS_24h
intracellular transport of virus (GO:0075733)	4	DEG_GSE152088; DEG_GSE168797_Mock_CBD; DEG_GSE168797_SARS_CBD; DEG_GSE179661_MHCC97H
MAPK signaling pathway Homo sapiens hsa04010	4	DEG_GSE151512_6h; DEG_GSE168797_SARS_CBD; DEG_GSE261716_CBD0.2_28d; DEG_GSE274859_LPS_24h
metaphase plate congression (GO:0051310)	4	DEG_GSE151512_12h; DEG_GSE168797_Mock_CBD; DEG_GSE168797_SARS_CBD; DEG_GSE274859_LPS_24h
microtubule depolymerization (GO:0007019)	4	DEG_GSE131565; DEG_GSE168797_Mock_CBD; DEG_GSE168797_SARS_CBD; DEG_GSE274859_LPS_24h
mitochondrial translational elongation (GO:0070125)	4	DEG_GSE131565; DEG_GSE151512_24h; DEG_GSE179661_HepG2; DEG_GSE201508_cGAMP
mitochondrial translational termination (GO:0070126)	4	DEG_GSE131565; DEG_GSE151512_24h; DEG_GSE179661_HepG2; DEG_GSE201508_cGAMP
mRNA surveillance pathway Homo sapiens hsa03015	4	DEG_GSE151512_24h; DEG_GSE168797_Mock_CBD; DEG_GSE168797_SARS_CBD; DEG_GSE274859_LPS_24h
negative regulation of cell proliferation (GO:0008285)	4	DEG_GSE151512_12h; DEG_GSE168797_Mock_CBD; DEG_GSE272113_CBD; DEG_GSE272113_sCBD
neural tube closure (GO:0001843)	4	DEG_GSE168797_Mock_CBD; DEG_GSE261716_CBD10_28d; DEG_GSE272113_CBD; DEG_GSE272113_sCBD
neutrophil degranulation (GO:0043312)	4	DEG_GSE179661_MHCC97H; DEG_GSE201508_cGAMP; DEG_GSE235310_Veh; DEG_GSE274859_LPS_24h
Non-alcoholic fatty liver disease (NAFLD) Homo sapiens hsa04932	4	DEG_GSE131565; DEG_GSE179661_MHCC97H; DEG_GSE272113_CBD; DEG_GSE274859_LPS_24h
Non-small cell lung cancer Homo sapiens hsa05223	4	DEG_GSE168797_Mock_CBD; DEG_GSE168797_SARS_CBD; DEG_GSE179661_MHCC97H; DEG_GSE274859_LPS_24h
nucleobase-containing compound metabolic process (GO:0006139)	4	DEG_GSE131565; DEG_GSE179661_HepG2; DEG_GSE179661_MHCC97H; DEG_GSE274859_LPS_24h
Oxidative phosphorylation Homo sapiens hsa00190	4	DEG_GSE131565; DEG_GSE151512_24h; DEG_GSE179661_MHCC97H; DEG_GSE272113_CBD
Parkinson's disease Homo sapiens hsa05012	4	DEG_GSE131565; DEG_GSE151512_24h; DEG_GSE168797_Mock_CBD; DEG_GSE272113_CBD
Pentose phosphate pathway Homo sapiens hsa00030	4	DEG_GSE168797_Mock_CBD; DEG_GSE179661_MHCC97H; DEG_GSE261716_CBD20_28d; DEG_GSE274859_LPS_24h
positive regulation of cell proliferation (GO:0008284)	4	DEG_GSE131565; DEG_GSE168797_SARS_CBD; DEG_GSE272113_CBD; DEG_GSE272113_sCBD
post-translational protein modification (GO:0043687)	4	DEG_GSE131565; DEG_GSE151512_24h; DEG_GSE179661_HepG2; DEG_GSE179661_MHCC97H
Pyruvate metabolism Homo sapiens hsa00620	4	DEG_GSE131565; DEG_GSE168797_Mock_CBD; DEG_GSE179661_MHCC97H; DEG_GSE274859_LPS_24h
regulation of cell shape (GO:0008360)	4	DEG_GSE168797_Mock_CBD; DEG_GSE168797_SARS_CBD; DEG_GSE201508_cGAMP; DEG_GSE272113_sCBD
regulation of cholesterol biosynthetic process (GO:0045540)	4	DEG_GSE179661_MHCC97H; DEG_GSE235310_LPS; DEG_GSE235310_Veh; DEG_GSE274859_LPS_24h
regulation of circadian rhythm (GO:0042752)	4	DEG_GSE168797_Mock_CBD; DEG_GSE168797_SARS_CBD; DEG_GSE168797_SARS_CBDV; DEG_GSE274859_LPS_24h
regulation of mitotic nuclear division (GO:0007088)	4	DEG_GSE168797_Mock_CBD; DEG_GSE168797_SARS_CBD; DEG_GSE179661_HepG2; DEG_GSE274859_LPS_24h
regulation of mitotic spindle organization (GO:0060236)	4	DEG_GSE131565; DEG_GSE151512_12h; DEG_GSE151512_24h; DEG_GSE168797_SARS_CBD
regulation of small GTPase mediated signal transduction (GO:0051056)	4	DEG_GSE168797_Mock_CBD; DEG_GSE168797_SARS_CBD; DEG_GSE272113_sCBD; DEG_GSE274859_LPS_24h
response to hypoxia (GO:0001666)	4	DEG_GSE151512_12h; DEG_GSE151512_24h; DEG_GSE151512_6h; DEG_GSE272113_CBD
RNA processing (GO:0006396)	4	DEG_GSE131565; DEG_GSE151512_24h; DEG_GSE168797_Mock_CBD; DEG_GSE274859_LPS_24h
Steroid biosynthesis Homo sapiens hsa00100	4	DEG_GSE179661_MHCC97H; DEG_GSE235310_LPS; DEG_GSE235310_Veh; DEG_GSE274859_LPS_24h
Valine, leucine and isoleucine degradation Homo sapiens hsa00280	4	DEG_GSE131565; DEG_GSE168797_Mock_CBD; DEG_GSE179661_HepG2; DEG_GSE179661_MHCC97H
Adherens junction Homo sapiens hsa04520	3	DEG_GSE261716_CBD0.2_2d; DEG_GSE272113_CBD; DEG_GSE272113_sCBD
Adrenergic signaling in cardiomyocytes Homo sapiens hsa04261	3	DEG_GSE179661_MHCC97H; DEG_GSE272113_CBD; DEG_GSE274859_LPS_24h
Amoebiasis Homo sapiens hsa05146	3	DEG_GSE168797_SARS_CBDV; DEG_GSE272113_CBD; DEG_GSE272113_sCBD
apoptotic process (GO:0006915)	3	DEG_GSE201508_cGAMP; DEG_GSE235310_LPS; DEG_GSE274859_LPS_24h
ATP-dependent chromatin remodeling (GO:0043044)	3	DEG_GSE131565; DEG_GSE151512_24h; DEG_GSE168797_Mock_CBD
cell cycle arrest (GO:0007050)	3	DEG_GSE131565; DEG_GSE179661_MHCC97H; DEG_GSE274859_LPS_24h
cell division (GO:0051301)	3	DEG_GSE235310_LPS; DEG_GSE235310_Veh; DEG_GSE274859_LPS_24h
collagen fibril organization (GO:0030199)	3	DEG_GSE131565; DEG_GSE272113_CBD; DEG_GSE272113_sCBD
double-strand break repair via nonhomologous end joining (GO:0006303)	3	DEG_GSE131565; DEG_GSE151512_24h; DEG_GSE179661_HepG2
endodermal cell differentiation (GO:0035987)	3	DEG_GSE131565; DEG_GSE272113_CBD; DEG_GSE272113_sCBD
error-free translesion synthesis (GO:0070987)	3	DEG_GSE151512_24h; DEG_GSE179661_HepG2; DEG_GSE274859_LPS_24h
error-prone translesion synthesis (GO:0042276)	3	DEG_GSE168797_Mock_CBD; DEG_GSE179661_HepG2; DEG_GSE274859_LPS_24h
Fatty acid degradation Homo sapiens hsa00071	3	DEG_GSE131565; DEG_GSE179661_HepG2; DEG_GSE179661_MHCC97H
fatty-acyl-CoA biosynthetic process (GO:0046949)	3	DEG_GSE131565; DEG_GSE179661_MHCC97H; DEG_GSE274859_LPS_24h
Fc gamma R-mediated phagocytosis Homo sapiens hsa04666	3	DEG_GSE168797_Mock_CBD; DEG_GSE261716_CBD0.2_2d; DEG_GSE274859_LPS_24h
FoxO signaling pathway Homo sapiens hsa04068	3	DEG_GSE261716_CBD0.2_2d; DEG_GSE272113_sCBD; DEG_GSE274859_LPS_24h
Fructose and mannose metabolism Homo sapiens hsa00051	3	DEG_GSE151512_24h; DEG_GSE179661_MHCC97H; DEG_GSE274859_LPS_24h
Glioma Homo sapiens hsa05214	3	DEG_GSE168797_SARS_CBD; DEG_GSE179661_MHCC97H; DEG_GSE274859_LPS_24h
gluconeogenesis (GO:0006094)	3	DEG_GSE179661_MHCC97H; DEG_GSE274435_DMSO_24h; DEG_GSE274859_LPS_24h
glycosaminoglycan biosynthetic process (GO:0006024)	3	DEG_GSE131565; DEG_GSE168797_Mock_CBD; DEG_GSE179661_MHCC97H
HIF-1 signaling pathway Homo sapiens hsa04066	3	DEG_GSE151512_12h; DEG_GSE151512_6h; DEG_GSE274859_LPS_24h
Influenza A Homo sapiens hsa05164	3	DEG_GSE152088; DEG_GSE201508_cGAMP; DEG_GSE261716_CBD0.2_2d
integrin-mediated signaling pathway (GO:0007229)	3	DEG_GSE131565; DEG_GSE179661_MHCC97H; DEG_GSE272113_sCBD
Measles Homo sapiens hsa05162	3	DEG_GSE152088; DEG_GSE201508_cGAMP; DEG_GSE261716_CBD0.2_2d
microtubule-based movement (GO:0007018)	3	DEG_GSE168797_Mock_CBD; DEG_GSE168797_SARS_CBD; DEG_GSE274859_LPS_24h
mitotic chromosome condensation (GO:0007076)	3	DEG_GSE168797_Mock_CBD; DEG_GSE168797_SARS_CBD; DEG_GSE274859_LPS_24h
mitotic recombination (GO:0006312)	3	DEG_GSE131565; DEG_GSE168797_Mock_CBD; DEG_GSE179661_HepG2
mitotic spindle organization (GO:0007052)	3	DEG_GSE168797_Mock_CBD; DEG_GSE168797_SARS_CBD; DEG_GSE274859_LPS_24h
mRNA processing (GO:0006397)	3	DEG_GSE151512_24h; DEG_GSE168797_Mock_CBD; DEG_GSE274859_LPS_24h
negative regulation of cell migration (GO:0030336)	3	DEG_GSE168797_Mock_CBD; DEG_GSE168797_SARS_CBD; DEG_GSE272113_sCBD
negative regulation of protein binding (GO:0032091)	3	DEG_GSE168797_Mock_CBD; DEG_GSE201508_cGAMP; DEG_GSE274859_LPS_24h
Notch signaling pathway Homo sapiens hsa04330	3	DEG_GSE261716_CBD10_28d; DEG_GSE272113_sCBD; DEG_GSE274859_LPS_24h
nuclear import (GO:0051170)	3	DEG_GSE131565; DEG_GSE151512_24h; DEG_GSE274859_LPS_24h
nucleobase-containing small molecule interconversion (GO:0015949)	3	DEG_GSE179661_HepG2; DEG_GSE179661_MHCC97H; DEG_GSE274859_LPS_24h
Oxytocin signaling pathway Homo sapiens hsa04921	3	DEG_GSE168797_Mock_CBD; DEG_GSE168797_SARS_CBD; DEG_GSE274859_LPS_24h
Peroxisome Homo sapiens hsa04146	3	DEG_GSE131565; DEG_GSE179661_HepG2; DEG_GSE179661_MHCC97H
platelet degranulation (GO:0002576)	3	DEG_GSE179661_MHCC97H; DEG_GSE272113_CBD; DEG_GSE272113_sCBD
positive regulation of endothelial cell migration (GO:0010595)	3	DEG_GSE261716_CBD0.2_2d; DEG_GSE272113_CBD; DEG_GSE272113_sCBD
positive regulation of epithelial to mesenchymal transition (GO:0010718)	3	DEG_GSE168797_Mock_CBD; DEG_GSE272113_CBD; DEG_GSE272113_sCBD
positive regulation of protein localization to Cajal body (GO:1904871)	3	DEG_GSE131565; DEG_GSE179661_MHCC97H; DEG_GSE274859_LPS_24h
positive regulation of telomerase RNA localization to Cajal body (GO:1904874)	3	DEG_GSE131565; DEG_GSE179661_MHCC97H; DEG_GSE274859_LPS_24h
positive regulation of telomere maintenance via telomerase (GO:0032212)	3	DEG_GSE131565; DEG_GSE152088; DEG_GSE274859_LPS_24h
positive regulation of type I interferon production (GO:0032481)	3	DEG_GSE131565; DEG_GSE152088; DEG_GSE274859_LPS_24h
Propanoate metabolism Homo sapiens hsa00640	3	DEG_GSE131565; DEG_GSE179661_HepG2; DEG_GSE179661_MHCC97H
Prostate cancer Homo sapiens hsa05215	3	DEG_GSE261716_CBD0.2_2d; DEG_GSE272113_sCBD; DEG_GSE274859_LPS_24h
protein localization to kinetochore (GO:0034501)	3	DEG_GSE168797_Mock_CBD; DEG_GSE168797_SARS_CBD; DEG_GSE179661_HepG2
protein ubiquitination involved in ubiquitin-dependent protein catabolic process (GO:0042787)	3	DEG_GSE151512_12h; DEG_GSE168797_Mock_CBD; DEG_GSE274859_LPS_24h
purine nucleobase biosynthetic process (GO:0009113)	3	DEG_GSE131565; DEG_GSE168797_Mock_CBD; DEG_GSE274859_LPS_24h
purine nucleotide biosynthetic process (GO:0006164)	3	DEG_GSE131565; DEG_GSE168797_Mock_CBD; DEG_GSE274859_LPS_24h
purine ribonucleoside monophosphate biosynthetic process (GO:0009168)	3	DEG_GSE131565; DEG_GSE168797_Mock_CBD; DEG_GSE274859_LPS_24h
regulation of cell migration (GO:0030334)	3	DEG_GSE168797_Mock_CBD; DEG_GSE261716_CBD0.2_2d; DEG_GSE272113_sCBD
regulation of DNA replication (GO:0006275)	3	DEG_GSE168797_Mock_CBD; DEG_GSE168797_SARS_CBD; DEG_GSE274859_LPS_24h
regulation of transcription from RNA polymerase II promoter (GO:0006357)	3	DEG_GSE151512_24h; DEG_GSE168797_Mock_CBD; DEG_GSE168797_SARS_CBD
resolution of meiotic recombination intermediates (GO:0000712)	3	DEG_GSE131565; DEG_GSE168797_Mock_CBD; DEG_GSE274859_LPS_24h
response to ionizing radiation (GO:0010212)	3	DEG_GSE131565; DEG_GSE168797_Mock_CBD; DEG_GSE179661_HepG2
response to virus (GO:0009615)	3	DEG_GSE131565; DEG_GSE152088; DEG_GSE201508_cGAMP
RNA polymerase Homo sapiens hsa03020	3	DEG_GSE131565; DEG_GSE179661_MHCC97H; DEG_GSE274859_LPS_24h
RNA secondary structure unwinding (GO:0010501)	3	DEG_GSE131565; DEG_GSE152088; DEG_GSE179661_MHCC97H
rRNA processing (GO:0006364)	3	DEG_GSE131565; DEG_GSE152088; DEG_GSE274859_LPS_24h
Signaling pathways regulating pluripotency of stem cells Homo sapiens hsa04550	3	DEG_GSE168797_Mock_CBD; DEG_GSE179661_MHCC97H; DEG_GSE261716_CBD0.2_2d
spliceosomal complex assembly (GO:0000245)	3	DEG_GSE131565; DEG_GSE151512_24h; DEG_GSE274859_LPS_24h
spliceosomal snRNP assembly (GO:0000387)	3	DEG_GSE131565; DEG_GSE151512_24h; DEG_GSE274859_LPS_24h
Terpenoid backbone biosynthesis Homo sapiens hsa00900	3	DEG_GSE179661_MHCC97H; DEG_GSE235310_LPS; DEG_GSE274859_LPS_24h
Tight junction Homo sapiens hsa04530	3	DEG_GSE168797_Mock_CBD; DEG_GSE272113_CBD; DEG_GSE272113_sCBD
Transcriptional misregulation in cancer Homo sapiens hsa05202	3	DEG_GSE168797_SARS_CBDV; DEG_GSE272113_sCBD; DEG_GSE274859_LPS_24h
tricarboxylic acid cycle (GO:0006099)	3	DEG_GSE131565; DEG_GSE168797_Mock_CBD; DEG_GSE272113_CBD
Ubiquitin mediated proteolysis Homo sapiens hsa04120	3	DEG_GSE179661_HepG2; DEG_GSE272113_sCBD; DEG_GSE274859_LPS_24h
ventricular septum morphogenesis (GO:0060412)	3	DEG_GSE151512_12h; DEG_GSE272113_CBD; DEG_GSE272113_sCBD
3'-UTR-mediated mRNA stabilization (GO:0070935)	2	DEG_GSE151512_24h; DEG_GSE274859_LPS_24h
ABC transporters Homo sapiens hsa02010	2	DEG_GSE179661_MHCC97H; DEG_GSE261716_CBD20_28d
actin filament organization (GO:0007015)	2	DEG_GSE272113_CBD; DEG_GSE272113_sCBD
Acute myeloid leukemia Homo sapiens hsa05221	2	DEG_GSE261716_CBD0.2_2d; DEG_GSE274859_LPS_24h
adherens junction organization (GO:0034332)	2	DEG_GSE168797_Mock_CBD; DEG_GSE272113_sCBD
Adipocytokine signaling pathway Homo sapiens hsa04920	2	DEG_GSE261716_CBD20_28d; DEG_GSE261716_CBD20_2d
aerobic respiration (GO:0009060)	2	DEG_GSE131565; DEG_GSE179661_HepG2
anaphase-promoting complex-dependent catabolic process (GO:0031145)	2	DEG_GSE131565; DEG_GSE274859_LPS_24h
Arginine and proline metabolism Homo sapiens hsa00330	2	DEG_GSE168797_Mock_CBD; DEG_GSE179661_MHCC97H
attachment of GPI anchor to protein (GO:0016255)	2	DEG_GSE131565; DEG_GSE179661_MHCC97H
attachment of mitotic spindle microtubules to kinetochore (GO:0051315)	2	DEG_GSE168797_Mock_CBD; DEG_GSE274859_LPS_24h
axon guidance (GO:0007411)	2	DEG_GSE272113_CBD; DEG_GSE272113_sCBD
B cell receptor signaling pathway Homo sapiens hsa04662	2	DEG_GSE261716_CBD0.2_2d; DEG_GSE274859_LPS_24h
Basal cell carcinoma Homo sapiens hsa05217	2	DEG_GSE168797_Mock_CBD; DEG_GSE272113_sCBD
base-excision repair (GO:0006284)	2	DEG_GSE131565; DEG_GSE274859_LPS_24h
Biosynthesis of amino acids Homo sapiens hsa01230	2	DEG_GSE179661_MHCC97H; DEG_GSE274859_LPS_24h
branched-chain amino acid catabolic process (GO:0009083)	2	DEG_GSE168797_Mock_CBD; DEG_GSE179661_HepG2
cAMP signaling pathway Homo sapiens hsa04024	2	DEG_GSE168797_Mock_CBD; DEG_GSE168797_SARS_CBDV
cardiac muscle contraction (GO:0060048)	2	DEG_GSE272113_CBD; DEG_GSE272113_sCBD
Cardiac muscle contraction Homo sapiens hsa04260	2	DEG_GSE179661_MHCC97H; DEG_GSE272113_CBD
cell cycle (GO:0007049)	2	DEG_GSE131565; DEG_GSE274859_LPS_24h
cell cycle checkpoint (GO:0000075)	2	DEG_GSE168797_Mock_CBD; DEG_GSE168797_SARS_CBD
cellular aldehyde metabolic process (GO:0006081)	2	DEG_GSE168797_Mock_CBD; DEG_GSE179661_MHCC97H
cellular protein modification process (GO:0006464)	2	DEG_GSE151512_24h; DEG_GSE272113_sCBD
cellular response to ionizing radiation (GO:0071479)	2	DEG_GSE151512_24h; DEG_GSE274859_LPS_24h
centriole replication (GO:0007099)	2	DEG_GSE168797_Mock_CBD; DEG_GSE168797_SARS_CBD
cGMP-PKG signaling pathway Homo sapiens hsa04022	2	DEG_GSE168797_Mock_CBD; DEG_GSE274859_LPS_24h
chemical synaptic transmission (GO:0007268)	2	DEG_GSE274435_DMSO_24h; DEG_GSE274435_EtOH_24h
Choline metabolism in cancer Homo sapiens hsa05231	2	DEG_GSE261716_CBD0.2_2d; DEG_GSE274859_LPS_24h
chromatin organization (GO:0006325)	2	DEG_GSE168797_Mock_CBD; DEG_GSE274859_LPS_24h
cilium assembly (GO:0060271)	2	DEG_GSE179661_HepG2; DEG_GSE272113_CBD
circadian regulation of gene expression (GO:0032922)	2	DEG_GSE168797_SARS_CBDV; DEG_GSE261716_CBD10_28d
collagen catabolic process (GO:0030574)	2	DEG_GSE131565; DEG_GSE272113_sCBD
Complement and coagulation cascades Homo sapiens hsa04610	2	DEG_GSE179661_HepG2; DEG_GSE179661_MHCC97H
creatine metabolic process (GO:0006600)	2	DEG_GSE272113_CBD; DEG_GSE272113_sCBD
Cysteine and methionine metabolism Homo sapiens hsa00270	2	DEG_GSE179661_HepG2; DEG_GSE179661_MHCC97H
Cytokine-cytokine receptor interaction Homo sapiens hsa04060	2	DEG_GSE168797_SARS_CBDV; DEG_GSE261716_CBD0.2_2d
cytokinesis (GO:0000910)	2	DEG_GSE168797_Mock_CBD; DEG_GSE168797_SARS_CBD
cytoskeleton-dependent intracellular transport (GO:0030705)	2	DEG_GSE168797_SARS_CBD; DEG_GSE274859_LPS_24h
DNA damage checkpoint (GO:0000077)	2	DEG_GSE152088; DEG_GSE168797_Mock_CBD
DNA duplex unwinding (GO:0032508)	2	DEG_GSE179661_HepG2; DEG_GSE274859_LPS_24h
DNA replication-dependent nucleosome assembly (GO:0006335)	2	DEG_GSE151512_24h; DEG_GSE274859_LPS_24h
DNA topological change (GO:0006265)	2	DEG_GSE168797_Mock_CBD; DEG_GSE274859_LPS_24h
Endocytosis Homo sapiens hsa04144	2	DEG_GSE168797_Mock_CBD; DEG_GSE261716_CBD0.2_2d
ephrin receptor signaling pathway (GO:0048013)	2	DEG_GSE168797_Mock_CBD; DEG_GSE179661_MHCC97H
epithelial to mesenchymal transition (GO:0001837)	2	DEG_GSE131565; DEG_GSE168797_Mock_CBD
epithelial to mesenchymal transition involved in endocardial cushion formation (GO:0003198)	2	DEG_GSE272113_CBD; DEG_GSE272113_sCBD
establishment of protein localization to plasma membrane (GO:0090002)	2	DEG_GSE168797_Mock_CBD; DEG_GSE261716_CBD0.2_28d
Estrogen signaling pathway Homo sapiens hsa04915	2	DEG_GSE179661_MHCC97H; DEG_GSE274859_LPS_24h
G2 DNA damage checkpoint (GO:0031572)	2	DEG_GSE168797_Mock_CBD; DEG_GSE168797_SARS_CBD
Galactose metabolism Homo sapiens hsa00052	2	DEG_GSE179661_MHCC97H; DEG_GSE261716_CBD20_28d
Glucagon signaling pathway Homo sapiens hsa04922	2	DEG_GSE261716_CBD20_28d; DEG_GSE272113_CBD
glycolytic process (GO:0006096)	2	DEG_GSE274435_DMSO_24h; DEG_GSE274859_LPS_24h
Glycosaminoglycan biosynthesis - heparan sulfate / heparin Homo sapiens hsa00534	2	DEG_GSE131565; DEG_GSE179661_MHCC97H
glycosaminoglycan metabolic process (GO:0030203)	2	DEG_GSE131565; DEG_GSE179661_MHCC97H
Glycosylphosphatidylinositol(GPI)-anchor biosynthesis Homo sapiens hsa00563	2	DEG_GSE131565; DEG_GSE179661_MHCC97H
Glyoxylate and dicarboxylate metabolism Homo sapiens hsa00630	2	DEG_GSE131565; DEG_GSE274859_LPS_24h
Inositol phosphate metabolism Homo sapiens hsa00562	2	DEG_GSE261716_CBD20_2d; DEG_GSE274859_LPS_24h
insulin receptor signaling pathway (GO:0008286)	2	DEG_GSE151512_6h; DEG_GSE272113_sCBD
Insulin resistance Homo sapiens hsa04931	2	DEG_GSE261716_CBD20_28d; DEG_GSE261716_CBD20_2d
Insulin secretion Homo sapiens hsa04911	2	DEG_GSE151512_6h; DEG_GSE274435_DMSO_24h
intracellular signal transduction (GO:0035556)	2	DEG_GSE168797_SARS_CBD; DEG_GSE274859_LPS_24h
intraciliary transport involved in cilium assembly (GO:0035735)	2	DEG_GSE179661_HepG2; DEG_GSE272113_CBD
Leishmaniasis Homo sapiens hsa05140	2	DEG_GSE201508_cGAMP; DEG_GSE274859_LPS_24h
Longevity regulating pathway - mammal Homo sapiens hsa04211	2	DEG_GSE261716_CBD20_28d; DEG_GSE261716_CBD20_2d
maturation of SSU-rRNA from tricistronic rRNA transcript (SSU-rRNA, 5.8S rRNA, LSU-rRNA) (GO:0000462)	2	DEG_GSE131565; DEG_GSE152088
microtubule bundle formation (GO:0001578)	2	DEG_GSE151512_6h; DEG_GSE274859_LPS_24h
mitochondrial translation (GO:0032543)	2	DEG_GSE131565; DEG_GSE179661_HepG2
Morphine addiction Homo sapiens hsa05032	2	DEG_GSE168797_Mock_CBD; DEG_GSE168797_SARS_CBD
muscle contraction (GO:0006936)	2	DEG_GSE272113_CBD; DEG_GSE272113_sCBD
muscle filament sliding (GO:0030049)	2	DEG_GSE272113_CBD; DEG_GSE272113_sCBD
muscle organ development (GO:0007517)	2	DEG_GSE272113_CBD; DEG_GSE272113_sCBD
N-Glycan biosynthesis Homo sapiens hsa00510	2	DEG_GSE179661_HepG2; DEG_GSE179661_MHCC97H
negative regulation of anoikis (GO:2000811)	2	DEG_GSE272113_CBD; DEG_GSE272113_sCBD
negative regulation of circadian rhythm (GO:0042754)	2	DEG_GSE168797_Mock_CBD; DEG_GSE168797_SARS_CBD
negative regulation of translation (GO:0017148)	2	DEG_GSE151512_24h; DEG_GSE179661_MHCC97H
negative regulation of ubiquitin-protein ligase activity involved in mitotic cell cycle (GO:0051436)	2	DEG_GSE131565; DEG_GSE151512_24h
negative regulation of viral genome replication (GO:0045071)	2	DEG_GSE131565; DEG_GSE201508_cGAMP
nervous system development (GO:0007399)	2	DEG_GSE151512_6h; DEG_GSE274435_DMSO_24h
neuronal stem cell population maintenance (GO:0097150)	2	DEG_GSE168797_SARS_CBD; DEG_GSE168797_SARS_CBDV
Neurotrophin signaling pathway Homo sapiens hsa04722	2	DEG_GSE151512_6h; DEG_GSE168797_Mock_CBDV
NF-kappa B signaling pathway Homo sapiens hsa04064	2	DEG_GSE168797_Mock_CBDV; DEG_GSE168797_SARS_CBDV
nuclear envelope organization (GO:0006998)	2	DEG_GSE168797_Mock_CBD; DEG_GSE274859_LPS_24h
nucleotide-excision repair (GO:0006289)	2	DEG_GSE168797_Mock_CBD; DEG_GSE179661_HepG2
odontogenesis (GO:0042476)	2	DEG_GSE272113_CBD; DEG_GSE272113_sCBD
osteoblast differentiation (GO:0001649)	2	DEG_GSE131565; DEG_GSE152088
Osteoclast differentiation Homo sapiens hsa04380	2	DEG_GSE201508_cGAMP; DEG_GSE261716_CBD0.2_2d
peptidyl-serine phosphorylation (GO:0018105)	2	DEG_GSE168797_SARS_CBD; DEG_GSE274859_LPS_24h
Phosphatidylinositol signaling system Homo sapiens hsa04070	2	DEG_GSE261716_CBD20_2d; DEG_GSE274859_LPS_24h
Phospholipase D signaling pathway Homo sapiens hsa04072	2	DEG_GSE272113_CBD; DEG_GSE272113_sCBD
positive regulation of actin filament polymerization (GO:0030838)	2	DEG_GSE272113_CBD; DEG_GSE272113_sCBD
positive regulation of angiogenesis (GO:0045766)	2	DEG_GSE168797_Mock_CBDV; DEG_GSE272113_sCBD
positive regulation of cell migration (GO:0030335)	2	DEG_GSE272113_CBD; DEG_GSE272113_sCBD
positive regulation of cytokinesis (GO:0032467)	2	DEG_GSE168797_Mock_CBD; DEG_GSE274859_LPS_24h
positive regulation of double-strand break repair (GO:2000781)	2	DEG_GSE131565; DEG_GSE168797_Mock_CBD
positive regulation of establishment of protein localization to telomere (GO:1904851)	2	DEG_GSE131565; DEG_GSE274859_LPS_24h
positive regulation of fibroblast proliferation (GO:0048146)	2	DEG_GSE131565; DEG_GSE272113_CBD
positive regulation of NF-kappaB transcription factor activity (GO:0051092)	2	DEG_GSE168797_Mock_CBDV; DEG_GSE201508_cGAMP
positive regulation of smooth muscle cell proliferation (GO:0048661)	2	DEG_GSE272113_CBD; DEG_GSE272113_sCBD
positive regulation of ubiquitin-protein ligase activity involved in regulation of mitotic cell cycle transition (GO:0051437)	2	DEG_GSE131565; DEG_GSE151512_24h
potassium ion transport (GO:0006813)	2	DEG_GSE274435_DMSO_24h; DEG_GSE274435_EtOH_24h
protein import into nucleus (GO:0006606)	2	DEG_GSE151512_24h; DEG_GSE168797_Mock_CBD
protein phosphorylation (GO:0006468)	2	DEG_GSE168797_SARS_CBD; DEG_GSE274859_LPS_24h
protein stabilization (GO:0050821)	2	DEG_GSE152088; DEG_GSE274859_LPS_24h
pulmonary valve morphogenesis (GO:0003184)	2	DEG_GSE272113_CBD; DEG_GSE272113_sCBD
reciprocal meiotic recombination (GO:0007131)	2	DEG_GSE179661_HepG2; DEG_GSE274859_LPS_24h
regulation of cyclin-dependent protein serine/threonine kinase activity (GO:0000079)	2	DEG_GSE151512_24h; DEG_GSE274859_LPS_24h
regulation of double-strand break repair via homologous recombination (GO:0010569)	2	DEG_GSE151512_24h; DEG_GSE274859_LPS_24h
regulation of G1/S transition of mitotic cell cycle (GO:2000045)	2	DEG_GSE272113_CBD; DEG_GSE274859_LPS_24h
regulation of heart rate (GO:0002027)	2	DEG_GSE272113_CBD; DEG_GSE272113_sCBD
respiratory electron transport chain (GO:0022904)	2	DEG_GSE179661_HepG2; DEG_GSE272113_CBD
response to cytokine (GO:0034097)	2	DEG_GSE168797_SARS_CBDV; DEG_GSE201508_cGAMP
response to interferon-alpha (GO:0035455)	2	DEG_GSE131565; DEG_GSE201508_cGAMP
response to interferon-beta (GO:0035456)	2	DEG_GSE131565; DEG_GSE201508_cGAMP
ribosomal large subunit assembly (GO:0000027)	2	DEG_GSE131565; DEG_GSE274859_LPS_24h
ribosomal large subunit biogenesis (GO:0042273)	2	DEG_GSE131565; DEG_GSE274859_LPS_24h
Ribosome biogenesis in eukaryotes Homo sapiens hsa03008	2	DEG_GSE131565; DEG_GSE152088
Ribosome Homo sapiens hsa03010	2	DEG_GSE131565; DEG_GSE272113_CBD
RNA splicing, via transesterification reactions (GO:0000375)	2	DEG_GSE151512_24h; DEG_GSE168797_Mock_CBD
sarcomere organization (GO:0045214)	2	DEG_GSE272113_CBD; DEG_GSE272113_sCBD
skeletal muscle contraction (GO:0003009)	2	DEG_GSE272113_CBD; DEG_GSE272113_sCBD
skeletal muscle tissue development (GO:0007519)	2	DEG_GSE272113_CBD; DEG_GSE272113_sCBD
skeletal system development (GO:0001501)	2	DEG_GSE131565; DEG_GSE272113_sCBD
snRNA transcription from RNA polymerase II promoter (GO:0042795)	2	DEG_GSE151512_12h; DEG_GSE151512_24h
Sphingolipid signaling pathway Homo sapiens hsa04071	2	DEG_GSE168797_Mock_CBD; DEG_GSE235310_LPS
spindle assembly (GO:0051225)	2	DEG_GSE168797_Mock_CBD; DEG_GSE274859_LPS_24h
sprouting angiogenesis (GO:0002040)	2	DEG_GSE168797_Mock_CBD; DEG_GSE272113_sCBD
striated muscle contraction (GO:0006941)	2	DEG_GSE272113_CBD; DEG_GSE272113_sCBD
substantia nigra development (GO:0021762)	2	DEG_GSE151512_24h; DEG_GSE168797_Mock_CBD
substrate adhesion-dependent cell spreading (GO:0034446)	2	DEG_GSE168797_SARS_CBD; DEG_GSE272113_sCBD
sympathetic nervous system development (GO:0048485)	2	DEG_GSE151512_12h; DEG_GSE151512_24h
TNF signaling pathway Homo sapiens hsa04668	2	DEG_GSE168797_SARS_CBDV; DEG_GSE235310_LPS
Toxoplasmosis Homo sapiens hsa05145	2	DEG_GSE179661_MHCC97H; DEG_GSE261716_CBD0.2_2d
transcription, DNA-templated (GO:0006351)	2	DEG_GSE151512_24h; DEG_GSE168797_Mock_CBD
translational initiation (GO:0006413)	2	DEG_GSE272113_CBD; DEG_GSE274859_LPS_24h
vascular endothelial growth factor receptor signaling pathway (GO:0048010)	2	DEG_GSE261716_CBD0.2_2d; DEG_GSE272113_sCBD
VEGF signaling pathway Homo sapiens hsa04370	2	DEG_GSE179661_MHCC97H; DEG_GSE274859_LPS_24h
7-methylguanosine mRNA capping (GO:0006370)	1	DEG_GSE131565
actin cytoskeleton organization (GO:0030036)	1	DEG_GSE168797_Mock_CBD
actin filament bundle assembly (GO:0051017)	1	DEG_GSE272113_sCBD
adherens junction assembly (GO:0034333)	1	DEG_GSE168797_Mock_CBD
Aldosterone synthesis and secretion Homo sapiens hsa04925	1	DEG_GSE274859_LPS_24h
alternative mRNA splicing, via spliceosome (GO:0000380)	1	DEG_GSE151512_24h
Amphetamine addiction Homo sapiens hsa05031	1	DEG_GSE168797_SARS_CBDV
Amyotrophic lateral sclerosis (ALS) Homo sapiens hsa05014	1	DEG_GSE201508_cGAMP
androgen receptor signaling pathway (GO:0030521)	1	DEG_GSE151512_24h
antigen processing and presentation of endogenous peptide antigen via MHC class I (GO:0019885)	1	DEG_GSE131565
apoptotic DNA fragmentation (GO:0006309)	1	DEG_GSE274859_LPS_24h
astral microtubule organization (GO:0030953)	1	DEG_GSE168797_SARS_CBD
atrioventricular valve morphogenesis (GO:0003181)	1	DEG_GSE272113_sCBD
attachment of spindle microtubules to kinetochore (GO:0008608)	1	DEG_GSE274859_LPS_24h
axon extension involved in axon guidance (GO:0048846)	1	DEG_GSE168797_SARS_CBD
axonogenesis (GO:0007409)	1	DEG_GSE272113_sCBD
Bile secretion Homo sapiens hsa04976	1	DEG_GSE179661_MHCC97H
biotin metabolic process (GO:0006768)	1	DEG_GSE179661_MHCC97H
blood vessel development (GO:0001568)	1	DEG_GSE272113_sCBD
BMP signaling pathway (GO:0030509)	1	DEG_GSE272113_sCBD
branching involved in blood vessel morphogenesis (GO:0001569)	1	DEG_GSE272113_sCBD
Butanoate metabolism Homo sapiens hsa00650	1	DEG_GSE179661_HepG2
Carbohydrate digestion and absorption Homo sapiens hsa04973	1	DEG_GSE274859_LPS_24h
carbohydrate metabolic process (GO:0005975)	1	DEG_GSE179661_MHCC97H
cardiac right ventricle morphogenesis (GO:0003215)	1	DEG_GSE131565
Cell adhesion molecules (CAMs) Homo sapiens hsa04514	1	DEG_GSE235310_Veh
cell migration (GO:0016477)	1	DEG_GSE168797_Mock_CBD
cell motility (GO:0048870)	1	DEG_GSE272113_sCBD
cell-matrix adhesion (GO:0007160)	1	DEG_GSE272113_sCBD
cellular protein complex localization (GO:0034629)	1	DEG_GSE168797_SARS_CBD
cellular respiration (GO:0045333)	1	DEG_GSE179661_MHCC97H
cellular response to fibroblast growth factor stimulus (GO:0044344)	1	DEG_GSE168797_SARS_CBDV
cellular response to gamma radiation (GO:0071480)	1	DEG_GSE274859_LPS_24h
cellular response to lipopolysaccharide (GO:0071222)	1	DEG_GSE168797_SARS_CBDV
cellular response to oxidative stress (GO:0034599)	1	DEG_GSE179661_MHCC97H
cellular response to starvation (GO:0009267)	1	DEG_GSE274859_LPS_24h
cellular response to UV (GO:0034644)	1	DEG_GSE274859_LPS_24h
cellular response to vascular endothelial growth factor stimulus (GO:0035924)	1	DEG_GSE272113_sCBD
centrosome localization (GO:0051642)	1	DEG_GSE168797_Mock_CBD
Chagas disease (American trypanosomiasis) Homo sapiens hsa05142	1	DEG_GSE179661_MHCC97H
Chemokine signaling pathway Homo sapiens hsa04062	1	DEG_GSE235310_LPS
cholesterol homeostasis (GO:0042632)	1	DEG_GSE179661_MHCC97H
Cholinergic synapse Homo sapiens hsa04725	1	DEG_GSE274859_LPS_24h
chromatin assembly (GO:0031497)	1	DEG_GSE168797_Mock_CBD
chromatin-mediated maintenance of transcription (GO:0048096)	1	DEG_GSE168797_SARS_CBD
chromosome organization (GO:0051276)	1	DEG_GSE151512_24h
Cocaine addiction Homo sapiens hsa05030	1	DEG_GSE168797_SARS_CBDV
cytoplasmic mRNA processing body assembly (GO:0033962)	1	DEG_GSE151512_24h
defense response to virus (GO:0051607)	1	DEG_GSE201508_cGAMP
dendritic cell differentiation (GO:0097028)	1	DEG_GSE201508_cGAMP
DNA metabolic process (GO:0006259)	1	DEG_GSE168797_Mock_CBD
DNA-dependent DNA replication (GO:0006261)	1	DEG_GSE274859_LPS_24h
DNA-templated transcription, initiation (GO:0006352)	1	DEG_GSE274859_LPS_24h
Dopaminergic synapse Homo sapiens hsa04728	1	DEG_GSE168797_Mock_CBD
Drug metabolism - cytochrome P450 Homo sapiens hsa00982	1	DEG_GSE179661_MHCC97H
embryonic digit morphogenesis (GO:0042733)	1	DEG_GSE131565
embryonic limb morphogenesis (GO:0030326)	1	DEG_GSE272113_sCBD
endochondral ossification (GO:0001958)	1	DEG_GSE272113_sCBD
Endocrine and other factor-regulated calcium reabsorption Homo sapiens hsa04961	1	DEG_GSE168797_Mock_CBD
endocytic recycling (GO:0032456)	1	DEG_GSE272113_sCBD
Endometrial cancer Homo sapiens hsa05213	1	DEG_GSE168797_Mock_CBD
entrainment of circadian clock by photoperiod (GO:0043153)	1	DEG_GSE168797_Mock_CBD
epidermal growth factor receptor signaling pathway (GO:0007173)	1	DEG_GSE272113_sCBD
Epithelial cell signaling in Helicobacter pylori infection Homo sapiens hsa05120	1	DEG_GSE179661_MHCC97H
Epstein-Barr virus infection Homo sapiens hsa05169	1	DEG_GSE274859_LPS_24h
ErbB signaling pathway Homo sapiens hsa04012	1	DEG_GSE274859_LPS_24h
establishment or maintenance of epithelial cell apical/basal polarity (GO:0045197)	1	DEG_GSE272113_sCBD
ethanol catabolic process (GO:0006068)	1	DEG_GSE179661_HepG2
ethanol oxidation (GO:0006069)	1	DEG_GSE179661_HepG2
extracellular matrix disassembly (GO:0022617)	1	DEG_GSE272113_sCBD
face morphogenesis (GO:0060325)	1	DEG_GSE272113_sCBD
fat cell differentiation (GO:0045444)	1	DEG_GSE272113_sCBD
Fc epsilon RI signaling pathway Homo sapiens hsa04664	1	DEG_GSE179661_MHCC97H
fibroblast growth factor receptor signaling pathway (GO:0008543)	1	DEG_GSE151512_24h
filopodium assembly (GO:0046847)	1	DEG_GSE274859_LPS_24h
Folate biosynthesis Homo sapiens hsa00790	1	DEG_GSE131565
folic acid metabolic process (GO:0046655)	1	DEG_GSE274859_LPS_24h
GABAergic synapse Homo sapiens hsa04727	1	DEG_GSE274435_DMSO_24h
galactose catabolic process (GO:0019388)	1	DEG_GSE179661_MHCC97H
Gastric acid secretion Homo sapiens hsa04971	1	DEG_GSE274859_LPS_24h
global genome nucleotide-excision repair (GO:0070911)	1	DEG_GSE179661_HepG2
glucose homeostasis (GO:0042593)	1	DEG_GSE261716_CBD20_28d
Glutamatergic synapse Homo sapiens hsa04724	1	DEG_GSE274435_DMSO_24h
Glutathione metabolism Homo sapiens hsa00480	1	DEG_GSE179661_MHCC97H
Glycine, serine and threonine metabolism Homo sapiens hsa00260	1	DEG_GSE179661_HepG2
glycosaminoglycan catabolic process (GO:0006027)	1	DEG_GSE179661_MHCC97H
Glycosaminoglycan degradation Homo sapiens hsa00531	1	DEG_GSE179661_MHCC97H
Glycosphingolipid biosynthesis - globo series Homo sapiens hsa00603	1	DEG_GSE179661_MHCC97H
GnRH signaling pathway Homo sapiens hsa04912	1	DEG_GSE179661_MHCC97H
heart development (GO:0007507)	1	DEG_GSE272113_sCBD
Hematopoietic cell lineage Homo sapiens hsa04640	1	DEG_GSE235310_Veh
heme biosynthetic process (GO:0006783)	1	DEG_GSE179661_HepG2
hemidesmosome assembly (GO:0031581)	1	DEG_GSE131565
hemopoiesis (GO:0030097)	1	DEG_GSE272113_sCBD
hepatocyte growth factor receptor signaling pathway (GO:0048012)	1	DEG_GSE168797_SARS_CBD
Herpes simplex infection Homo sapiens hsa05168	1	DEG_GSE201508_cGAMP
histone exchange (GO:0043486)	1	DEG_GSE151512_24h
histone H2B ubiquitination (GO:0033523)	1	DEG_GSE151512_24h
histone H3-K4 methylation (GO:0051568)	1	DEG_GSE168797_SARS_CBD
histone H3-K9 demethylation (GO:0033169)	1	DEG_GSE151512_24h
histone H4-K16 acetylation (GO:0043984)	1	DEG_GSE168797_SARS_CBD
histone methylation (GO:0016571)	1	DEG_GSE274859_LPS_24h
histone monoubiquitination (GO:0010390)	1	DEG_GSE151512_24h
homophilic cell adhesion via plasma membrane adhesion molecules (GO:0007156)	1	DEG_GSE168797_Mock_CBD
I-kappaB kinase/NF-kappaB signaling (GO:0007249)	1	DEG_GSE235310_LPS
Inflammatory mediator regulation of TRP channels Homo sapiens hsa04750	1	DEG_GSE179661_MHCC97H
inflammatory response (GO:0006954)	1	DEG_GSE201508_cGAMP
innate immune response (GO:0045087)	1	DEG_GSE201508_cGAMP
interferon-gamma-mediated signaling pathway (GO:0060333)	1	DEG_GSE201508_cGAMP
interphase microtubule nucleation by interphase microtubule organizing center (GO:0051415)	1	DEG_GSE168797_SARS_CBD
intrinsic apoptotic signaling pathway in response to DNA damage by p53 class mediator (GO:0042771)	1	DEG_GSE201508_cGAMP
intrinsic apoptotic signaling pathway in response to oxidative stress (GO:0008631)	1	DEG_GSE274859_LPS_24h
Jak-STAT signaling pathway Homo sapiens hsa04630	1	DEG_GSE261716_CBD0.2_2d
keratan sulfate biosynthetic process (GO:0018146)	1	DEG_GSE272113_sCBD
kidney development (GO:0001822)	1	DEG_GSE168797_Mock_CBD
kinetochore assembly (GO:0051382)	1	DEG_GSE274859_LPS_24h
Legionellosis Homo sapiens hsa05134	1	DEG_GSE168797_SARS_CBDV
Long-term potentiation Homo sapiens hsa04720	1	DEG_GSE274859_LPS_24h
Longevity regulating pathway - multiple species Homo sapiens hsa04213	1	DEG_GSE272113_sCBD
low-density lipoprotein particle clearance (GO:0034383)	1	DEG_GSE179661_MHCC97H
Lysosome Homo sapiens hsa04142	1	DEG_GSE179661_MHCC97H
Malaria Homo sapiens hsa05144	1	DEG_GSE272113_sCBD
MAPK cascade (GO:0000165)	1	DEG_GSE272113_CBD
maturation of LSU-rRNA (GO:0000470)	1	DEG_GSE131565
Melanogenesis Homo sapiens hsa04916	1	DEG_GSE168797_Mock_CBD
Melanoma Homo sapiens hsa05218	1	DEG_GSE274859_LPS_24h
membrane budding (GO:0006900)	1	DEG_GSE235310_LPS
membrane raft assembly (GO:0001765)	1	DEG_GSE168797_Mock_CBD
Metabolism of xenobiotics by cytochrome P450 Homo sapiens hsa00980	1	DEG_GSE179661_MHCC97H
microtubule cytoskeleton organization (GO:0000226)	1	DEG_GSE168797_SARS_CBD
microtubule nucleation (GO:0007020)	1	DEG_GSE168797_SARS_CBD
miRNA metabolic process (GO:0010586)	1	DEG_GSE274859_LPS_24h
mitochondrial electron transport, cytochrome c to oxygen (GO:0006123)	1	DEG_GSE131565
mitochondrial electron transport, ubiquinol to cytochrome c (GO:0006122)	1	DEG_GSE131565
mitochondrial respiratory chain complex III assembly (GO:0034551)	1	DEG_GSE131565
mitochondrial respiratory chain complex IV assembly (GO:0033617)	1	DEG_GSE131565
mitotic cell cycle checkpoint (GO:0007093)	1	DEG_GSE151512_12h
mitotic DNA replication checkpoint (GO:0033314)	1	DEG_GSE179661_HepG2
mitotic G2 DNA damage checkpoint (GO:0007095)	1	DEG_GSE179661_HepG2
mitotic spindle assembly checkpoint (GO:0007094)	1	DEG_GSE274859_LPS_24h
mitral valve morphogenesis (GO:0003183)	1	DEG_GSE168797_Mock_CBD
movement of cell or subcellular component (GO:0006928)	1	DEG_GSE274859_LPS_24h
mRNA splice site selection (GO:0006376)	1	DEG_GSE151512_24h
mTOR signaling pathway Homo sapiens hsa04150	1	DEG_GSE261716_CBD0.2_2d
MyD88-dependent toll-like receptor signaling pathway (GO:0002755)	1	DEG_GSE152088
myeloid cell differentiation (GO:0030099)	1	DEG_GSE168797_SARS_CBD
negative regulation of apoptotic process (GO:0043066)	1	DEG_GSE272113_sCBD
negative regulation of canonical Wnt signaling pathway (GO:0090090)	1	DEG_GSE272113_CBD
negative regulation of cell cycle (GO:0045786)	1	DEG_GSE168797_SARS_CBDV
negative regulation of cell cycle arrest (GO:0071157)	1	DEG_GSE151512_24h
negative regulation of cell growth (GO:0030308)	1	DEG_GSE274859_LPS_24h
negative regulation of cell-matrix adhesion (GO:0001953)	1	DEG_GSE274859_LPS_24h
negative regulation of defense response to virus (GO:0050687)	1	DEG_GSE168797_Mock_CBD
negative regulation of DNA damage response, signal transduction by p53 class mediator (GO:0043518)	1	DEG_GSE272113_sCBD
negative regulation of DNA recombination (GO:0045910)	1	DEG_GSE168797_Mock_CBD
negative regulation of endothelial cell apoptotic process (GO:2000352)	1	DEG_GSE168797_SARS_CBDV
negative regulation of ERK1 and ERK2 cascade (GO:0070373)	1	DEG_GSE179661_MHCC97H
negative regulation of fat cell differentiation (GO:0045599)	1	DEG_GSE274859_LPS_24h
negative regulation of gene expression (GO:0010629)	1	DEG_GSE272113_sCBD
negative regulation of interferon-gamma production (GO:0032689)	1	DEG_GSE131565
negative regulation of mRNA splicing, via spliceosome (GO:0048025)	1	DEG_GSE168797_Mock_CBD
negative regulation of myoblast differentiation (GO:0045662)	1	DEG_GSE272113_CBD
negative regulation of Notch signaling pathway (GO:0045746)	1	DEG_GSE201508_cGAMP
negative regulation of ossification (GO:0030279)	1	DEG_GSE168797_SARS_CBD
negative regulation of protein localization to cell surface (GO:2000009)	1	DEG_GSE272113_CBD
negative regulation of protein phosphorylation (GO:0001933)	1	DEG_GSE168797_Mock_CBD
negative regulation of stress fiber assembly (GO:0051497)	1	DEG_GSE272113_sCBD
negative regulation of type I interferon production (GO:0032480)	1	DEG_GSE201508_cGAMP
neuron projection development (GO:0031175)	1	DEG_GSE151512_12h
neurotransmitter secretion (GO:0007269)	1	DEG_GSE274435_DMSO_24h
Nicotinate and nicotinamide metabolism Homo sapiens hsa00760	1	DEG_GSE152088
NOD-like receptor signaling pathway Homo sapiens hsa04621	1	DEG_GSE201508_enthanol
Notch signaling pathway (GO:0007219)	1	DEG_GSE272113_sCBD
nuclear pore complex assembly (GO:0051292)	1	DEG_GSE152088
nuclear-transcribed mRNA catabolic process, nonsense-mediated decay (GO:0000184)	1	DEG_GSE272113_CBD
nucleocytoplasmic transport (GO:0006913)	1	DEG_GSE274859_LPS_24h
nucleosome disassembly (GO:0006337)	1	DEG_GSE151512_24h
nucleotide-excision repair, DNA duplex unwinding (GO:0000717)	1	DEG_GSE179661_HepG2
nucleotide-excision repair, DNA incision, 3'-to lesion (GO:0006295)	1	DEG_GSE179661_HepG2
nucleotide-excision repair, preincision complex assembly (GO:0006294)	1	DEG_GSE179661_HepG2
nucleotide-excision repair, preincision complex stabilization (GO:0006293)	1	DEG_GSE179661_HepG2
One carbon pool by folate Homo sapiens hsa00670	1	DEG_GSE274859_LPS_24h
Other glycan degradation Homo sapiens hsa00511	1	DEG_GSE179661_MHCC97H
Other types of O-glycan biosynthesis Homo sapiens hsa00514	1	DEG_GSE274859_LPS_24h
outflow tract morphogenesis (GO:0003151)	1	DEG_GSE272113_sCBD
oxidation-reduction process (GO:0055114)	1	DEG_GSE179661_MHCC97H
Pentose and glucuronate interconversions Homo sapiens hsa00040	1	DEG_GSE179661_MHCC97H
peptidyl-tyrosine phosphorylation (GO:0018108)	1	DEG_GSE272113_CBD
peroxisome organization (GO:0007031)	1	DEG_GSE179661_MHCC97H
Pertussis Homo sapiens hsa05133	1	DEG_GSE201508_enthanol
pharyngeal arch artery morphogenesis (GO:0061626)	1	DEG_GSE168797_Mock_CBD
Phenylalanine metabolism Homo sapiens hsa00360	1	DEG_GSE179661_MHCC97H
phosphorylation (GO:0016310)	1	DEG_GSE274859_LPS_24h
plasminogen activation (GO:0031639)	1	DEG_GSE179661_MHCC97H
Platelet activation Homo sapiens hsa04611	1	DEG_GSE179661_MHCC97H
platelet-derived growth factor receptor signaling pathway (GO:0048008)	1	DEG_GSE272113_sCBD
Porphyrin and chlorophyll metabolism Homo sapiens hsa00860	1	DEG_GSE179661_MHCC97H
positive regulation of basement membrane assembly involved in embryonic body morphogenesis (GO:1904261)	1	DEG_GSE168797_SARS_CBD
positive regulation of blood vessel endothelial cell migration (GO:0043536)	1	DEG_GSE272113_sCBD
positive regulation of bone mineralization (GO:0030501)	1	DEG_GSE131565
positive regulation of cell cycle (GO:0045787)	1	DEG_GSE151512_12h
positive regulation of cell cycle arrest (GO:0071158)	1	DEG_GSE272113_CBD
positive regulation of cellular metabolic process (GO:0031325)	1	DEG_GSE179661_MHCC97H
positive regulation of cellular protein catabolic process (GO:1903364)	1	DEG_GSE168797_Mock_CBD
positive regulation of collagen biosynthetic process (GO:0032967)	1	DEG_GSE272113_sCBD
positive regulation of epithelial cell migration (GO:0010634)	1	DEG_GSE168797_Mock_CBD
positive regulation of G1/S transition of mitotic cell cycle (GO:1900087)	1	DEG_GSE274859_LPS_24h
positive regulation of gene expression (GO:0010628)	1	DEG_GSE274859_LPS_24h
positive regulation of gene expression, epigenetic (GO:0045815)	1	DEG_GSE274859_LPS_24h
positive regulation of glycogen biosynthetic process (GO:0045725)	1	DEG_GSE272113_sCBD
positive regulation of I-kappaB kinase/NF-kappaB signaling (GO:0043123)	1	DEG_GSE272113_sCBD
positive regulation of interferon-beta production (GO:0032728)	1	DEG_GSE152088
positive regulation of intracellular estrogen receptor signaling pathway (GO:0033148)	1	DEG_GSE179661_MHCC97H
positive regulation of lamellipodium assembly (GO:0010592)	1	DEG_GSE235310_LPS
positive regulation of microtubule polymerization (GO:0031116)	1	DEG_GSE272113_sCBD
positive regulation of mitochondrial translation (GO:0070131)	1	DEG_GSE131565
positive regulation of mitotic cell cycle spindle assembly checkpoint (GO:0090267)	1	DEG_GSE131565
positive regulation of mRNA 3'-end processing (GO:0031442)	1	DEG_GSE151512_24h
positive regulation of mRNA splicing, via spliceosome (GO:0048026)	1	DEG_GSE151512_24h
positive regulation of muscle cell differentiation (GO:0051149)	1	DEG_GSE272113_sCBD
positive regulation of myoblast differentiation (GO:0045663)	1	DEG_GSE272113_sCBD
positive regulation of nuclear-transcribed mRNA poly(A) tail shortening (GO:0060213)	1	DEG_GSE168797_SARS_CBDV
positive regulation of ossification (GO:0045778)	1	DEG_GSE131565
positive regulation of osteoblast differentiation (GO:0045669)	1	DEG_GSE272113_sCBD
positive regulation of peptidyl-tyrosine phosphorylation (GO:0050731)	1	DEG_GSE272113_sCBD
positive regulation of phosphatidylinositol 3-kinase signaling (GO:0014068)	1	DEG_GSE272113_sCBD
positive regulation of protein insertion into mitochondrial membrane involved in apoptotic signaling pathway (GO:1900740)	1	DEG_GSE151512_12h
positive regulation of protein kinase activity (GO:0045860)	1	DEG_GSE274859_LPS_24h
positive regulation of protein targeting to membrane (GO:0090314)	1	DEG_GSE272113_sCBD
positive regulation of protein ubiquitination (GO:0031398)	1	DEG_GSE168797_Mock_CBD
positive regulation of reactive oxygen species metabolic process (GO:2000379)	1	DEG_GSE272113_sCBD
positive regulation of receptor biosynthetic process (GO:0010870)	1	DEG_GSE168797_Mock_CBD
positive regulation of Rho protein signal transduction (GO:0035025)	1	DEG_GSE272113_sCBD
positive regulation of stress-activated MAPK cascade (GO:0032874)	1	DEG_GSE272113_sCBD
positive regulation of telomerase activity (GO:0051973)	1	DEG_GSE274859_LPS_24h
positive regulation of transcription elongation from RNA polymerase II promoter (GO:0032968)	1	DEG_GSE151512_24h
positive regulation of transcription from RNA polymerase III promoter (GO:0045945)	1	DEG_GSE131565
positive regulation of translational initiation (GO:0045948)	1	DEG_GSE151512_24h
positive regulation of ubiquitin protein ligase activity (GO:1904668)	1	DEG_GSE274859_LPS_24h
positive regulation of viral transcription (GO:0050434)	1	DEG_GSE151512_24h
positive regulation of Wnt signaling pathway (GO:0030177)	1	DEG_GSE272113_sCBD
Primary immunodeficiency Homo sapiens hsa05340	1	DEG_GSE235310_Veh
Prion diseases Homo sapiens hsa05020	1	DEG_GSE272113_CBD
Prolactin signaling pathway Homo sapiens hsa04917	1	DEG_GSE261716_CBD0.2_2d
proteasome-mediated ubiquitin-dependent protein catabolic process (GO:0043161)	1	DEG_GSE151512_24h
protein autophosphorylation (GO:0046777)	1	DEG_GSE274859_LPS_24h
protein complex assembly (GO:0006461)	1	DEG_GSE272113_sCBD
protein dephosphorylation (GO:0006470)	1	DEG_GSE274859_LPS_24h
protein deubiquitination (GO:0016579)	1	DEG_GSE274859_LPS_24h
protein export from nucleus (GO:0006611)	1	DEG_GSE274859_LPS_24h
protein K11-linked ubiquitination (GO:0070979)	1	DEG_GSE274859_LPS_24h
protein localization to centrosome (GO:0071539)	1	DEG_GSE179661_HepG2
Protein processing in endoplasmic reticulum Homo sapiens hsa04141	1	DEG_GSE151512_24h
Proximal tubule bicarbonate reclamation Homo sapiens hsa04964	1	DEG_GSE274859_LPS_24h
pyruvate metabolic process (GO:0006090)	1	DEG_GSE168797_Mock_CBD
Ras protein signal transduction (GO:0007265)	1	DEG_GSE274859_LPS_24h
Ras signaling pathway Homo sapiens hsa04014	1	DEG_GSE274859_LPS_24h
reactive oxygen species metabolic process (GO:0072593)	1	DEG_GSE272113_CBD
regulation of actin cytoskeleton organization (GO:0032956)	1	DEG_GSE168797_Mock_CBD
regulation of alternative mRNA splicing, via spliceosome (GO:0000381)	1	DEG_GSE151512_24h
regulation of apoptotic process (GO:0042981)	1	DEG_GSE272113_CBD
regulation of ATPase activity (GO:0043462)	1	DEG_GSE272113_sCBD
regulation of axonogenesis (GO:0050770)	1	DEG_GSE272113_sCBD
regulation of canonical Wnt signaling pathway (GO:0060828)	1	DEG_GSE274859_LPS_24h
regulation of cell proliferation (GO:0042127)	1	DEG_GSE235310_LPS
regulation of chromosome segregation (GO:0051983)	1	DEG_GSE151512_12h
regulation of cytoskeleton organization (GO:0051493)	1	DEG_GSE272113_sCBD
regulation of gene expression, epigenetic (GO:0040029)	1	DEG_GSE274859_LPS_24h
regulation of GTPase activity (GO:0043087)	1	DEG_GSE168797_Mock_CBD
regulation of insulin secretion involved in cellular response to glucose stimulus (GO:0061178)	1	DEG_GSE168797_SARS_CBD
regulation of keratinocyte differentiation (GO:0045616)	1	DEG_GSE235310_LPS
regulation of lamellipodium assembly (GO:0010591)	1	DEG_GSE274859_LPS_24h
regulation of lipid metabolic process (GO:0019216)	1	DEG_GSE168797_Mock_CBDV
regulation of macroautophagy (GO:0016241)	1	DEG_GSE151512_24h
regulation of mitotic cell cycle (GO:0007346)	1	DEG_GSE168797_Mock_CBD
regulation of mRNA splicing, via spliceosome (GO:0048024)	1	DEG_GSE151512_24h
regulation of neuron apoptotic process (GO:0043523)	1	DEG_GSE168797_Mock_CBD
regulation of protein phosphorylation (GO:0001932)	1	DEG_GSE272113_CBD
regulation of stress fiber assembly (GO:0051492)	1	DEG_GSE274859_LPS_24h
regulation of synaptic plasticity (GO:0048167)	1	DEG_GSE151512_12h
regulation of transcription from RNA polymerase I promoter (GO:0006356)	1	DEG_GSE151512_24h
regulation of transcription from RNA polymerase II promoter in response to hypoxia (GO:0061418)	1	DEG_GSE151512_24h
regulation of transcription, DNA-templated (GO:0006355)	1	DEG_GSE168797_SARS_CBDV
regulation of translation (GO:0006417)	1	DEG_GSE151512_12h
release of cytochrome c from mitochondria (GO:0001836)	1	DEG_GSE201508_cGAMP
respiratory chain complex IV assembly (GO:0008535)	1	DEG_GSE179661_MHCC97H
response to calcium ion (GO:0051592)	1	DEG_GSE179661_MHCC97H
response to lipopolysaccharide (GO:0032496)	1	DEG_GSE235310_LPS
response to unfolded protein (GO:0006986)	1	DEG_GSE152088
retrograde protein transport, ER to cytosol (GO:0030970)	1	DEG_GSE151512_24h
Rheumatoid arthritis Homo sapiens hsa05323	1	DEG_GSE168797_SARS_CBDV
RNA degradation Homo sapiens hsa03018	1	DEG_GSE274859_LPS_24h
Salmonella infection Homo sapiens hsa05132	1	DEG_GSE235310_LPS
Selenocompound metabolism Homo sapiens hsa00450	1	DEG_GSE179661_MHCC97H
semaphorin-plexin signaling pathway (GO:0071526)	1	DEG_GSE272113_sCBD
Shigellosis Homo sapiens hsa05131	1	DEG_GSE235310_LPS
Sphingolipid metabolism Homo sapiens hsa00600	1	DEG_GSE168797_Mock_CBDV
spliceosomal tri-snRNP complex assembly (GO:0000244)	1	DEG_GSE201508_cGAMP
SRP-dependent cotranslational protein targeting to membrane (GO:0006614)	1	DEG_GSE272113_CBD
sterol biosynthetic process (GO:0016126)	1	DEG_GSE274859_LPS_24h
strand invasion (GO:0042148)	1	DEG_GSE168797_Mock_CBD
sulfation (GO:0051923)	1	DEG_GSE179661_HepG2
Sulfur relay system Homo sapiens hsa04122	1	DEG_GSE168797_Mock_CBD
sympathetic ganglion development (GO:0061549)	1	DEG_GSE151512_12h
Synaptic vesicle cycle Homo sapiens hsa04721	1	DEG_GSE274435_DMSO_24h
T cell activation (GO:0042110)	1	DEG_GSE235310_LPS
T cell costimulation (GO:0031295)	1	DEG_GSE235310_LPS
t-circle formation (GO:0090656)	1	DEG_GSE179661_HepG2
telomere maintenance via telomerase (GO:0007004)	1	DEG_GSE274859_LPS_24h
termination of RNA polymerase I transcription (GO:0006363)	1	DEG_GSE131565
TGF-beta signaling pathway Homo sapiens hsa04350	1	DEG_GSE168797_Mock_CBD
Toll-like receptor signaling pathway Homo sapiens hsa04620	1	DEG_GSE261716_CBD0.2_2d
TOR signaling (GO:0031929)	1	DEG_GSE274859_LPS_24h
transcription elongation from RNA polymerase I promoter (GO:0006362)	1	DEG_GSE131565
transcription elongation from RNA polymerase II promoter (GO:0006368)	1	DEG_GSE151512_24h
transcription from RNA polymerase II promoter (GO:0006366)	1	DEG_GSE151512_24h
transcription initiation from RNA polymerase I promoter (GO:0006361)	1	DEG_GSE131565
transcription initiation from RNA polymerase II promoter (GO:0006367)	1	DEG_GSE168797_SARS_CBD
transforming growth factor beta receptor signaling pathway (GO:0007179)	1	DEG_GSE272113_sCBD
tRNA modification (GO:0006400)	1	DEG_GSE131565
Tryptophan metabolism Homo sapiens hsa00380	1	DEG_GSE179661_MHCC97H
Tuberculosis Homo sapiens hsa05152	1	DEG_GSE261716_CBD0.2_2d
type I interferon signaling pathway (GO:0060337)	1	DEG_GSE201508_cGAMP
Vasopressin-regulated water reabsorption Homo sapiens hsa04962	1	DEG_GSE272113_CBD
vesicle organization (GO:0016050)	1	DEG_GSE235310_LPS
Vibrio cholerae infection Homo sapiens hsa05110	1	DEG_GSE179661_MHCC97H
Viral carcinogenesis Homo sapiens hsa05203	1	DEG_GSE274859_LPS_24h
viral mRNA export from host cell nucleus (GO:0046784)	1	DEG_GSE168797_Mock_CBD
Viral myocarditis Homo sapiens hsa05416	1	DEG_GSE235310_LPS
viral transcription (GO:0019083)	1	DEG_GSE274859_LPS_24h
Vitamin digestion and absorption Homo sapiens hsa04977	1	DEG_GSE179661_MHCC97H
Wnt signaling pathway Homo sapiens hsa04310	1	DEG_GSE272113_sCBD
xenobiotic catabolic process (GO:0042178)	1	DEG_GSE179661_MHCC97H
