# Supplementary material for: Comparative analysis of 105 datasets across species and tissues reveals higher variability in transcriptomic responses to THC than CBD
Source: Research Square preprint supplement (doi:10.21203/rs.3.rs-6857614/v1), 2025-06-13
Supplement: Supplementary file 5 [file 59254ac47b9b16175ce66109.xlsx]

## Sheet: Up DEG
Name	Score
MLLT6	0.000101983
MT1M	0.000128
DUSP8	0.000285633
C11orf96	0.000571265
SMURF1	0.000856898
MT1F	0.00108746
MT1B	0.00114253
MT1G	0.00123505
HSPA6	0.0017138
AICDA	0.00178253
KLHDC7B	0.00192139
DGKD	0.00199943
DLG5	0.00228506
MT1H	0.00257069
KPNA7	0.00285633
NTAN1	0.00314196
GRIK4	0.00331126
MMP10	0.00342759
RET	0.00356506
H2AC19	0.00371322
ELP5	0.00399886
CREB5	0.00438868
ALOXE3	0.00457012
ZNF100	0.00485576
PNLDC1	0.00496689
PPAN-P2RY11	0.00514139
PRR5-ARHGAP8	0.00534759
NKD2	0.00542702
SBNO2	0.00570857
RPS28P7	0.00571265
SNCG	0.00571716
NRM	0.00599829
DOK7	0.00628392
DHRS9	0.00646178
NKPD1	0.00652529
RPL35	0.00661703
POMZP3	0.00685518
PLEKHB1	0.00713012
MMP12	0.00742645
EGR4	0.00799771
BMF	0.00815661
SLAMF1	0.00827815
B3GNT5	0.00828335
EVA1B	0.00851587
ARC	0.00856898
KRTAP4-4	0.00885461
PREX1	0.00888889
VIPR1	0.00891266
RNA5-8SP6	0.00914025
S100A2	0.00942588
TLCD2	0.00971151
NCF2	0.00971461
OR4K5	0.00993377
IL1RL1	0.0102828
GPRC5A	0.0105684
ITGA11	0.0106952
H4C12	0.010854
TREM1	0.0111397
IL11RA	0.0115894
IL11	0.0117109
IMPDH1P10	0.0119966
NTNG2	0.0122822
UGT1A1	0.0124777
HCN3	0.0125678
PRRC2A	0.0130293
S1PR1	0.0131391
AMIGO3	0.0134247
NOXA1	0.0134403
HTRA3	0.0137104
SLC30A2	0.013996
STK32A	0.0142602
ELF3	0.0143932
TM4SF19	0.0144903
C11orf86	0.0145673
KIZ	0.0145985
KIF1A	0.0148529
SLC7A11	0.015033
HTR7	0.0151385
HMX3	0.0154242
PKD1P1	0.0157098
MYZAP	0.0158871
H2AC7	0.0159954
PRSS3	0.0160428
C2orf81	0.0163132
DLEC1	0.0165563
ZBTB12	0.0165667
TMEM160	0.0166787
CDA	0.0167088
GEM	0.017138
NR1D1	0.0175547
CXCL3	0.0177092
CLSTN2	0.0178253
BBC3	0.0179046
IQCF1	0.0179949
XRCC6P1	0.0182805
PELI2	0.0185661
MMP3	0.0188518
AQP7P1	0.0191374
HSPA1B	0.019423
C18orf32	0.019528
H2BC19P	0.0195759
CYP1B1	0.0196078
SERTAD1	0.0196447
CCNA1	0.0197087
GGNBP1	0.0198675
IFI27L1	0.0199943
MT2A	0.0200724
MAFA	0.0205656
NPPC	0.0211368
TMEM238	0.0212072
CCN3	0.0213904
VGF	0.0214225
ZSCAN10	0.0217081
GNL1	0.0218978
SOCS3	0.0219937
PAM16	0.0222793
DOC2B	0.022565
SPATA6L	0.0228385
NACAD	0.0228506
CDKN2D	0.0229461
PRDM8	0.0231362
BEND6	0.0231729
ELP1	0.0231788
GLIS2	0.0231845
JOSD2	0.0234219
RPL6P10	0.0237075
EGR2	0.0239931
EGR1	0.0242357
PMEPA1	0.0242788
FBXL16	0.0244698
MEF2B	0.0245644
EIF5AL1	0.0249554
H3C4	0.0251357
CSPG4	0.02534
SPRR2D	0.0254213
MRM1	0.0257069
OSCAR	0.0259926
CLIC3	0.0261011
NEURL1	0.0262782
CRYBG2	0.0264024
WDR89	0.0264901
CXCL2	0.0268495
RNF223	0.0271351
MT1X	0.0271703
GADD45G	0.0274207
METRNL	0.0277064
ZNF467	0.0277325
SCAMP3	0.0281023
AMDHD2	0.0281457
CXCL8	0.0282776
BGLAP	0.0288489
GSTM1	0.0289855
AREG	0.0290905
ITPK1	0.0291345
PTGS2	0.0291971
SEMA6C	0.0293638
PLCH2	0.0294202
PSMD10P2	0.0297058
RNASEK-C17orf49	0.0302771
SPOCD1	0.030303
PAX2	0.031134
MUC12	0.0314196
RNASEH2C	0.031457
CLDND2	0.0319909
RYR3	0.032
SECTM1	0.0320856
GZMM	0.0322765
IGBP1P4	0.0325621
TMEM63C	0.0326264
PTHLH	0.0328478
MICOS10	0.0331126
BACH2	0.0331334
ARL14EPL	0.033419
STX11	0.0337047
CRACD	0.0338681
NPPB	0.0339903
KLHL26	0.0342577
TNFRSF9	0.0342759
ADAMTS17	0.0345616
TOB2P1	0.0348472
MCEMP1	0.0351328
ALPP	0.0354185
OXCT1	0.0355556
VARS1	0.0357041
SLC30A1	0.0357386
SMCO4	0.0358891
PTGER4	0.0359897
SSC5D	0.0362753
HEMK1	0.0364238
CSRNP1	0.036561
AQP7P2	0.0368466
FITM1	0.0374179
RAB6B	0.0375204
ST13P12	0.0377035
SPATA5	0.0380795
CSF2	0.0382748
TNFRSF18	0.0385604
ADGRF4	0.0386628
WFDC3	0.038846
CDYL2	0.0389601
CAPN8	0.0391317
LGALS7	0.0393646
RGCC	0.0397029
POLR2L	0.0397351
GABBR1	0.0399886
ABR	0.0402742
PAK6	0.0405598
COL5A1	0.040783
IQGAP2	0.0409982
GFPT2	0.0411311
NKAIN1	0.0414167
CALY	0.0417024
ZNF469	0.041988
KLF2	0.0422736
IGFLR1	0.0424144
IGFN1	0.0425593
ANKRD44	0.0427807
CCK	0.0428449
TTF1	0.0430464
ARTN	0.0431116
FOXL2	0.0431305
RPL13AP12	0.0434162
TNNT2	0.0437018
PDE9A	0.0437956
TENT5C	0.0439874
RRAD	0.0442731
RHCG	0.0448443
LENG9	0.04513
DUSP5	0.0454156
TEN1-CDK3	0.0454162
INPP5J	0.045677
LVRN	0.0457012
ATP5F1E	0.0463576
BDKRB1	0.0465581
JUNB	0.0470289
C19orf33	0.0471294
RAB26	0.0473083
LRRC24	0.047415
CHCHD10	0.0474157
FOSB	0.0477007
USP50	0.0480132
FLNC	0.0482719
IL1RAPL1	0.0488432
RAMP1	0.0489396
TMEM191A	0.0491288
FOXF2	0.0494145
C6orf89	0.0496689
SIPA1L2	0.0497001
HMOX1	0.0497834
ANXA10	0.0499109
AKR1C7P	0.0499857

## Sheet: Down DEG
Name	Score
DSEL	9.17579e-05
ZNF350	0.000106559
BDP1	0.000307882
CASP8AP2	0.000615764
DHX16	0.000769823
SRP9P1	0.000923645
CREB1	0.000959028
AK6	0.00123153
IKBKGP1	0.00153941
ATP13A4	0.00153965
TRIM27	0.00177936
H2AC18	0.00184729
INPP4B	0.00186728
RPL3P4	0.00215517
GOLGA6L22	0.00230947
ERMARD	0.00246305
PPIAP60	0.00277094
SPTBN2	0.00306137
FAR1	0.00307882
MAPK4	0.00307929
RRN3P3	0.0033867
CFAP44	0.00350652
BCL2L2-PABPN1	0.00355872
HSPB2-C11orf52	0.00369458
ENO1P1	0.00384911
GPR19	0.00400246
TDRD15	0.00431034
ASDURF	0.00461823
IFNB1	0.00461894
ZNF132	0.00492611
PCDHB8	0.00523399
PLA2G4B	0.00533808
NUTM2F	0.00538876
AIDAP2	0.00554187
FMN2	0.00555556
NLGN1	0.00584795
NRG4	0.00584975
TRAM1L1	0.00615764
KLRC4	0.00615858
RIMKLBP2	0.00646552
MECOM	0.00692841
LECT2	0.00708128
ETV5	0.00711744
PYCR3	0.00738916
SULF1	0.00739717
IL1A	0.00746914
TMPOP2	0.00769704
OR5B12	0.00769823
RASD1	0.00796965
NAT2	0.00800493
SPDYE9	0.00831281
GOLGA6L6	0.00840336
PKD2L1	0.00846805
RPS6KA2	0.00862069
HERC6	0.00923645
HMGB1P3	0.00923788
BTLA	0.0100077
DSTNP3	0.0102041
PRDM6	0.010468
ACKR4	0.0107759
RPL12P30	0.0107775
NOSTRIN	0.0110497
MRAP2	0.0110837
DNHD1	0.0110957
P4HTM	0.0111111
DGKI	0.0113916
TPSP2	0.0115473
PDPK2P	0.0116995
HNRNPA1P16	0.0120074
UGT1A3	0.0123153
TRPC5OS	0.0123172
ZDHHC13	0.012605
C6orf201	0.0126232
SLC13A4	0.012931
SLCO1C1	0.013087
EIF3CL	0.0132389
ADH1B	0.0135468
TTC23L	0.0138547
VCAM1	0.0138568
DMTN	0.0138889
ZNF648	0.0141626
SLC25A48	0.0144704
RPS3AP20	0.0146266
XNDC1N-ZNF705EP-ALG1L9P	0.0147783
PDE6C	0.0150862
EID1	0.0153941
PRDX3P1	0.0153965
FBXW11	0.0155709
ACE2	0.015702
PIK3R1	0.0157247
CYP2R1	0.0160099
PTCH1	0.0160142
ITIH3	0.0161663
ANGPTL1	0.0163177
NBPF25P	0.0165746
EML5	0.0166256
ELMO1	0.0166667
DGAT2	0.0169335
TAGAP	0.0169361
GC	0.0172414
TGFB3	0.0175439
ST8SIA5	0.0175493
SLC10A6	0.0177059
FOSL1	0.0177936
CTAGE7P	0.0178571
KLRG1	0.018165
KRTAP5-5	0.0184758
ARNT2	0.0187808
SULT1E1	0.0190887
PRSS41	0.0192456
ZNF781	0.0193966
CCT8P1	0.0197044
TRIL	0.0200123
POM121L4P	0.0200154
OR2V1	0.0206281
OOSP4A	0.0207852
PRCD	0.020936
PELI1	0.0210084
VWF	0.0212438
GLP2R	0.0215517
USP17L15	0.021555
ASB4	0.0218596
RPS24P17	0.0220994
THUMPD2	0.0221607
ZNF117	0.0221675
FAM111A	0.022284
H2BC8	0.0223249
CCDC152	0.0224754
KLLN	0.0227833
PKHD1L1	0.0230911
ENAM	0.0230947
F3	0.0231317
MUC1	0.0233918
KLHDC7A	0.023399
KSR2	0.0237069
SLC1A3	0.0238645
ARMC2	0.0240148
C1orf216	0.0243227
CYP7A1	0.0246305
HSPA8P18	0.0246343
DCUN1D1	0.024911
ITGAL	0.0249384
CD180	0.025
BRCA2	0.0251327
PDE5A	0.0252463
TENM2	0.0254042
SRY	0.0255542
EYS	0.0257397
CHST9	0.02617
NPIPA5	0.026174
GPM6B	0.0264778
SCN1A	0.0267857
GNLY	0.0269438
PPARGC1A	0.0270883
SPTLC3	0.0270936
HMGN5	0.0274015
GLS	0.0275832
CNTNAP3	0.0276243
PCDHB13	0.0277094
FAM21FP	0.0277136
FAM111B	0.0280172
APOB	0.0283251
TACSTD2	0.0284834
POTED	0.028633
KCNK12	0.0289409
POLA2	0.0292488
FOLR1P1	0.0292533
LY9	0.0294118
PCDHGB1	0.0295567
HSP90AB2P	0.0296942
PKDREJ	0.0298645
COX6CP1	0.0300231
FABP2	0.0301724
SPAG8	0.0304803
HSD17B6	0.0307882
RNFT2	0.0310961
GPR75	0.0314039
PDE3A	0.0315586
NTS	0.0315627
HOXD4	0.0317118
NPIPB5	0.0317774
PAQR8	0.0320197
CHD7	0.0320285
TTC3P1	0.0323276
LDHAP7	0.0323326
ETAA1	0.0326355
FRMPD2	0.0329433
HMGN2P40	0.0331024
LAMA2	0.0331944
ETV1	0.0332512
PLEKHM3	0.0333333
NPAP1P3	0.0338722
C12orf60	0.0341749
C1GALT1C1L	0.0344828
LINGO3	0.034642
NREP	0.0347906
G6PC1	0.0350985
SYT15	0.0354064
PAEP	0.0354119
CAPRIN2	0.0354289
WNK3	0.0355446
AGGF1P2	0.0355548
ONECUT1	0.0357143
ZNF214	0.0360222
RAB27B	0.0361111
DNAH8	0.0361817
ZNF682	0.03633
PRR15L	0.0369458
LNX1	0.0369515
CLDN20	0.0372537
NFE2	0.0375616
PRMT1P1	0.0377213
FAM74A6	0.0378151
MUC15	0.0378695
PCDHA7	0.0379952
PRORSD1P	0.0381773
DNAH12	0.0384023
BCDIN3D	0.0384507
CCDC162P	0.0384852
KCNAB1	0.0384911
RPS24P19	0.038674
ZNF37BP	0.0387931
FCHSD1	0.0388889
FLRT2	0.039101
DGKE	0.0391459
SYCP3	0.0392147
PNMA6E	0.039261
XRCC2	0.0394089
GPR119	0.0397167
ANP32BP1	0.0400308
CFB	0.0406404
C2orf66	0.0408006
LETM2	0.0409253
PLGLB2	0.0409357
GINS1	0.0409483
DLG2	0.0412562
COLCA2	0.041564
TBC1D10C	0.0415704
ARL6IP1P3	0.0420168
ZNF883	0.0421798
ABCB1	0.0423403
NIFK	0.0424767
RHEBP1	0.0424877
FZD3	0.0427046
SKP2	0.0431034
PTPRC	0.0431101
TTC30B	0.0434113
PCDHB16	0.0437192
TAS2R14	0.0438799
FCGBP	0.0440271
DEDD	0.0441989
PEX11A	0.044335
CDC14A	0.0444444
C10orf88B	0.0446429
TRIM63	0.0446497
TTC30A	0.0449507
THBS4	0.0452586
LMOD1	0.0454196
OSGEPL1	0.0455665
RGPD1	0.0458744
B4GAT1	0.0461823
INTS4P1	0.0461894
NCAPD2P1	0.0464901
LRP2	0.04651
GRIP1	0.0467836
KLB	0.046798
KCNQ2	0.0469592
SLC35B4	0.0471059
MNS1	0.0474138
ZNF248	0.0477217
OTOP3	0.047729
SMTNL2	0.0480296
ATP2B1	0.0480427
POLE2	0.0483374
PLA2G4D	0.0484988
DNAAF10	0.0486453
SERPINA7	0.0489532
GTF2IP1	0.0492611
ZIK1	0.0492687
ATP10B	0.049569
TTC27	0.0497238
XDH	0.0498221
CLEC2D	0.0498768

## Sheet: Up pathways
Term	Overlap	P.value	Adjusted.P.value	Odds.Ratio	Combined.Score	Genes
Mineral absorption Homo sapiens hsa04978	9/51	1.28579e-08	2.08298e-06	17.4501	317.057	MT2A;MT1M;MT1F;MT1G;HMOX1;MT1X;SLC30A1;MT1H;MT1B
TNF signaling pathway Homo sapiens hsa04668	8/110	7.49073e-05	0.00606749	6.34132	60.2379	SOCS3;CSF2;MMP3;CXCL3;PTGS2;JUNB;CXCL2;CREB5
Legionellosis Homo sapiens hsa05134	5/55	0.000623902	0.0336907	8.00772	59.0931	CXCL8;HSPA6;CXCL3;CXCL2;HSPA1B
negative regulation of growth (GO:0045926)	7/14	1.4359e-10	7.84435e-08	80.9098	1833.75	MT2A;MT1M;MT1F;MT1G;MT1X;MT1H;MT1B
cellular response to zinc ion (GO:0071294)	7/15	2.66362e-10	7.84435e-08	70.7925	1560.7	MT2A;MT1M;MT1F;MT1G;MT1X;MT1H;MT1B
