# Supplementary material for: Comparative analysis of 105 datasets across species and tissues reveals higher variability in transcriptomic responses to THC than CBD
Source: Research Square preprint supplement (doi:10.21203/rs.3.rs-6857614/v1), 2025-06-13
Supplement: Supplementary file 6 [file 6447f3a7532fcf159cdf17eb.xlsx]

## Sheet: Up DEG
Name	Score
MOXD1	2.49722e-05
DBP	4.61474e-05
CIDEC	4.80667e-05
CXCL2	0.000102041
THEMIS	0.00022475
CIART	0.0003632
PCSK4	0.000888889
REC114	0.00147175
GPCPD1	0.00236951
GADD45A	0.00238095
GDF15	0.00311378
MAL	0.0042203
SLAMF1	0.0047619
PER3	0.00508439
HHIPL2	0.00561875
CNTNAP1	0.00643434
GINS2	0.00863132
CGREF1	0.00901497
CD200	0.00952381
SERPINE1	0.00986436
ETFBKMT	0.0104658
GADD45B	0.0108957
COX6B2	0.0110127
FAM9C	0.0110974
KRT10	0.0119048
CXCL10	0.0123305
NR1D1	0.0137007
WEE1	0.0141233
EVI2B	0.0141343
S100A8	0.0160296
MAFF	0.0166667
ZNF423	0.0176678
PLAT	0.0184957
EIF4EBP3	0.0185002
ALPK2	0.0190476
USP2	0.0197056
BCL11A	0.0197287
KIF5C	0.0212014
ZNF14	0.0214286
NFKBIZ	0.0221948
CD226	0.0234279
FBXO36	0.0239909
STAP1	0.0246609
IL1RN	0.0255716
ALAS1	0.0259167
TTF1	0.0261905
ZBTB16	0.0282686
TNFAIP3	0.0283447
THBS1	0.02836
ATP5MD	0.0285714
OLFM2	0.0295931
VAV3	0.0308261
FAM107A	0.0318021
CYSLTR1	0.0320592
KCNK13	0.0332922
SMIM4	0.0333333
CYP2C18	0.0354679
RPL39	0.0357143
MOGAT1	0.0357583
TNFRSF11B	0.0380952
TMEM47	0.0382244
LPIN1	0.0388693
AQP4	0.0399555
SLC7A7	0.0420168
ZNF607	0.0424028
GGA3	0.0431566
BAIAP2L1	0.044051
CXCR2	0.0452381
MMP12	0.0456227
CISH	0.0468557
COX7C	0.047619
RANBP3L	0.0480888
ANLN	0.0493218

## Sheet: Down DEG
Name	Score
NPAS2	0.000139134
SIK1B	0.000183071
BACH2	0.00119559
PPP1R3G	0.001519
CDKN1A	0.00193625
FAM222A	0.00210777
LOXL4	0.00344174
GNAO1	0.00366748
LONRF3	0.00375101
CCDC120	0.00389105
DMTN	0.00411523
APOL4	0.00488998
RPS6KA2	0.0075775
TNFAIP8L3	0.0077821
LAMA5	0.00787402
ARNTL	0.00793602
RAB3C	0.00855746
NFIL3	0.00895902
C15orf39	0.00904167
MEGF6	0.00977995
LTBP2	0.0110024
ATF3	0.0116732
PPM1H	0.0121122
KSR2	0.0122249
PROK1	0.0123457
TLN1	0.0124
SLC25A25	0.0124021
FHDC1	0.0134474
PDK4	0.0142305
CREB5	0.0146699
CYP26A1	0.0155642
FCHSD1	0.015748
NR4A1	0.0158924
HERC3	0.0164609
SLC22A7	0.0171149
CNTROB	0.017856
GABRA2	0.0183374
TRIP13	0.0194553
ZNF428	0.0204697
MT1E	0.021211
CRY1	0.0217068
VN1R2	0.0220049
PPP1R10	0.0231467
E2F2	0.0233463
CUX2	0.0256724
IQCE	0.0257413
NFE2	0.0272374
FAM124A	0.0281174
FMN1	0.0290996
PRKAR1B	0.0293399
DUSP8	0.0305623
NCKAP5L	0.0311284
TRPM2	0.0317101
STAR	0.0327863
ATP2B2	0.0330073
SRGAP3	0.0348635
ADAM28	0.0350195
COL27A1	0.0366748
CASTOR2	0.0373057
CCDC92	0.0378973
C3orf18	0.0389105
CPXM1	0.0391198
MTHFR	0.0401761
DNMT1	0.0402198
SLC17A8	0.0403423
ANGEL1	0.0411523
BBOF1	0.0428016
EPOP	0.0430413
IL1B	0.0431937
CYP4F22	0.0440098
HAP1	0.0452323
ENGASE	0.0452675
MTCL1	0.0464548
RGS12	0.0466926
ADAMTSL1	0.0476773
SLC49A3	0.0488998
ADCY4	0.0493827

## Sheet: Up pathways
Term	Overlap	P.value	Adjusted.P.value	Old.P.value	Old.Adjusted.P.value	Odds.Ratio	Combined.Score	Genes
cellular response to lipopolysaccharide (GO:0071222)	5/55	1.70117e-06	0.000530764	0	0	29.2309	388.309	CXCL10;SERPINE1;TNFAIP3;STAP1;NR1D1
inflammatory response (GO:0006954)	6/209	0.000115212	0.013569	0	0	8.70112	78.9082	CXCL10;CXCR2;TNFRSF11B;CXCL2;THBS1;S100A8
