# Supplementary material for: Comparative analysis of 105 datasets across species and tissues reveals higher variability in transcriptomic responses to THC than CBD
Source: Research Square preprint supplement (doi:10.21203/rs.3.rs-6857614/v1), 2025-06-13
Supplement: Supplementary file 7 [file 829dc91b95ed71c2c12f4408.xlsx]

## Sheet: Table S2 Reference chemical met
ID	chemical	platform	species
GSE116813_DISC1	THC	bulk_rna_seq	Mus musculus
GSE116813_vehicle	THC	bulk_rna_seq	Mus musculus
GSE119441_CD	PFOA	bulk_rna_seq	Mus musculus
GSE119441_HFD	PFOA	bulk_rna_seq	Mus musculus
GSE121439	THC	micro_array	Macaca mulatta
GSE126297	BPA	micro_array	Mus musculus
GSE13044_10mg	PFOA	micro_array	Mus musculus
GSE13044_1mg	PFOA	micro_array	Mus musculus
GSE13044_3mg	PFOA	micro_array	Mus musculus
GSE13044_5mg	PFOA	micro_array	Mus musculus
GSE131565	CBD	bulk_rna_seq	Homo sapiens
GSE14712	PFOA	micro_array	Rattus norvegicus
GSE150723	THC	bulk_rna_seq	Macaca mulatta
GSE151512_12h	CBD	bulk_rna_seq	Homo sapiens
GSE151512_24h	CBD	bulk_rna_seq	Homo sapiens
GSE151512_3h	CBD	bulk_rna_seq	Homo sapiens
GSE151512_6h	CBD	bulk_rna_seq	Homo sapiens
GSE152088	CBD	bulk_rna_seq	Homo sapiens
GSE155845_female	BPA	bulk_rna_seq	Mus musculus
GSE155845_male	BPA	bulk_rna_seq	Mus musculus
GSE158188_Female	THC	bulk_rna_seq	Rattus norvegicus
GSE158188_Male	THC	bulk_rna_seq	Rattus norvegicus
GSE168797_Mock_CBD	CBD	bulk_rna_seq	Homo sapiens
GSE168797_Mock_CBDV	CBD	bulk_rna_seq	Homo sapiens
GSE168797_SARS_CBD	CBD	bulk_rna_seq	Homo sapiens
GSE168797_SARS_CBDV	CBD	bulk_rna_seq	Homo sapiens
GSE179661_HepG2	CBD	bulk_rna_seq	Homo sapiens
GSE179661_MHCC97H	CBD	bulk_rna_seq	Homo sapiens
GSE181487	THC	bulk_rna_seq	Macaca mulatta
GSE189821_Female_Amy	THC	bulk_rna_seq	Mus musculus
GSE189821_Female_DMS	THC	bulk_rna_seq	Mus musculus
GSE189821_Female_Nac	THC	bulk_rna_seq	Mus musculus
GSE189821_Female_PFC	THC	bulk_rna_seq	Mus musculus
GSE189821_Female_VTA	THC	bulk_rna_seq	Mus musculus
GSE189821_Male_Amy	THC	bulk_rna_seq	Mus musculus
GSE189821_Male_DMS	THC	bulk_rna_seq	Mus musculus
GSE189821_Male_Nac	THC	bulk_rna_seq	Mus musculus
GSE189821_Male_PFC	THC	bulk_rna_seq	Mus musculus
GSE189821_Male_VTA	THC	bulk_rna_seq	Mus musculus
GSE198131	Estradiol	bulk_rna_seq	Mus musculus
GSE198578	THC	bulk_rna_seq	Homo sapiens
GSE201508_cGAMP	CBD	bulk_rna_seq	Homo sapiens
GSE201508_enthanol	CBD	bulk_rna_seq	Homo sapiens
GSE207518	THC	bulk_rna_seq	Macaca mulatta
GSE213734_LPS	THC	bulk_rna_seq	Mus musculus
GSE213734_vehicle	THC	bulk_rna_seq	Mus musculus
GSE216112	THC	bulk_rna_seq	Macaca mulatta
GSE21790	Estradiol	micro_array	Homo sapiens
GSE226955_EpiLC	THC	bulk_rna_seq	Mus musculus
GSE226955_ESC	THC	bulk_rna_seq	Mus musculus
GSE226955_PGCLC	THC	bulk_rna_seq	Mus musculus
GSE23072_24hr	Estradiol	micro_array	Mus musculus
GSE23072_2hr	Estradiol	micro_array	Mus musculus
GSE23241_24hr	Estradiol	micro_array	Mus musculus
GSE23241_2hr	Estradiol	micro_array	Mus musculus
GSE232624_EtOH0.25_CBD0.75_12h	CBD	bulk_rna_seq	Homo sapiens
GSE232624_EtOH0.25_CBD0.75_6h	CBD	bulk_rna_seq	Homo sapiens
GSE232624_EtOH0.75_CBD0.75_12h	CBD	bulk_rna_seq	Homo sapiens
GSE232624_EtOH0.75_CBD0.75_6h	CBD	bulk_rna_seq	Homo sapiens
GSE232624_Veh_CBD0.75_12h	CBD	bulk_rna_seq	Homo sapiens
GSE232624_Veh_CBD0.75_6h	CBD	bulk_rna_seq	Homo sapiens
GSE232624_Veh_CBD3_12h	CBD	bulk_rna_seq	Homo sapiens
GSE232624_Veh_CBD3_6h	CBD	bulk_rna_seq	Homo sapiens
GSE235310_LPS	CBD	bulk_rna_seq	Homo sapiens
GSE235310_Veh	CBD	bulk_rna_seq	Homo sapiens
GSE235969_Female_Old_5d	THC	bulk_rna_seq	Mus musculus
GSE235969_Female_Old_5wk	THC	bulk_rna_seq	Mus musculus
GSE235969_Male_Young_5wk	THC	bulk_rna_seq	Mus musculus
GSE236956	PFOA	bulk_rna_seq	Homo sapiens
GSE240225_THC	THC	bulk_rna_seq	Rattus norvegicus
GSE240225_THC-COOH	THC	bulk_rna_seq	Rattus norvegicus
GSE242079_CBD3	CBD	bulk_rna_seq	Rattus norvegicus
GSE242079_CBD30	CBD	bulk_rna_seq	Rattus norvegicus
GSE242892_16p11dup	THC	bulk_rna_seq	Mus musculus
GSE242892_WT	THC	bulk_rna_seq	Mus musculus
GSE244644_FetalAorta	THC	bulk_rna_seq	Macaca mulatta
GSE244644_UmbilicalArtery	THC	bulk_rna_seq	Macaca mulatta
GSE244644_UmbilicalVein	THC	bulk_rna_seq	Macaca mulatta
GSE24525_BPA_24hr	BPA	micro_array	Mus musculus
GSE24525_BPA_2hr	BPA	micro_array	Mus musculus
GSE24525_Estradiol_24hr	Estradiol	micro_array	Mus musculus
GSE24525_Estradiol_2hr	Estradiol	micro_array	Mus musculus
GSE254408	PFOA	bulk_rna_seq	Homo sapiens
GSE259227_female_kidney	BPA	bulk_rna_seq	Rattus norvegicus
GSE259227_female_liver	BPA	bulk_rna_seq	Rattus norvegicus
GSE259227_female_ovaries	BPA	bulk_rna_seq	Rattus norvegicus
GSE259227_female_thyroid	BPA	bulk_rna_seq	Rattus norvegicus
GSE259227_male_kidney	BPA	bulk_rna_seq	Rattus norvegicus
GSE259227_male_liver	BPA	bulk_rna_seq	Rattus norvegicus
GSE259227_male_testes	BPA	bulk_rna_seq	Rattus norvegicus
GSE259227_male_thyroid	BPA	bulk_rna_seq	Rattus norvegicus
GSE261716_CBD0.2_28d	CBD	bulk_rna_seq	Mus musculus
GSE261716_CBD0.2_2d	CBD	bulk_rna_seq	Mus musculus
GSE261716_CBD10_28d	CBD	bulk_rna_seq	Mus musculus
GSE261716_CBD10_2d	CBD	bulk_rna_seq	Mus musculus
GSE261716_CBD20_28d	CBD	bulk_rna_seq	Mus musculus
GSE261716_CBD20_2d	CBD	bulk_rna_seq	Mus musculus
GSE262437_AsympCO	CBD	bulk_rna_seq	Mus musculus
GSE262437_SympCO	CBD	bulk_rna_seq	Mus musculus
GSE266113_mutCox15	CBD	bulk_rna_seq	Homo sapiens
GSE266113_mutNdufs4	CBD	bulk_rna_seq	Homo sapiens
GSE266113_WT	CBD	bulk_rna_seq	Homo sapiens
GSE270378_CBD0.325_24h	CBD	bulk_rna_seq	Mus musculus
GSE270378_CBD0.325_6h	CBD	bulk_rna_seq	Mus musculus
GSE270378_CBD0.75_24h	CBD	bulk_rna_seq	Mus musculus
GSE270378_CBD0.75_6h	CBD	bulk_rna_seq	Mus musculus
GSE270378_CBD1.5_24h	CBD	bulk_rna_seq	Mus musculus
GSE270378_CBD1.5_6h	CBD	bulk_rna_seq	Mus musculus
GSE270378_CBD3_24h	CBD	bulk_rna_seq	Mus musculus
GSE270378_CBD3_6h	CBD	bulk_rna_seq	Mus musculus
GSE272113_CBD	CBD	bulk_rna_seq	Mus musculus
GSE272113_sCBD	CBD	bulk_rna_seq	Mus musculus
GSE273695_Blood_Female_LPS	THC	bulk_rna_seq	Rattus norvegicus
GSE273695_Blood_Female_Saline	THC	bulk_rna_seq	Rattus norvegicus
GSE273695_Blood_Male_LPS	THC	bulk_rna_seq	Rattus norvegicus
GSE273695_Blood_Male_Saline	THC	bulk_rna_seq	Rattus norvegicus
GSE273695_Brain_Female_LPS	THC	bulk_rna_seq	Rattus norvegicus
GSE273695_Brain_Female_Saline	THC	bulk_rna_seq	Rattus norvegicus
GSE273695_Brain_Male_LPS	THC	bulk_rna_seq	Rattus norvegicus
GSE273695_Brain_Male_Saline	THC	bulk_rna_seq	Rattus norvegicus
GSE274435_DMSO_24h	CBD	bulk_rna_seq	Rattus norvegicus
GSE274435_DMSO_4h	CBD	bulk_rna_seq	Rattus norvegicus
GSE274435_EtOH_24h	CBD	bulk_rna_seq	Rattus norvegicus
GSE274435_EtOH_4h	CBD	bulk_rna_seq	Rattus norvegicus
GSE274859_LPS_24h	CBD	bulk_rna_seq	Mus musculus
GSE274859_LPS_4h	CBD	bulk_rna_seq	Mus musculus
GSE275998_CDB10	CBD	bulk_rna_seq	Mus musculus
GSE275998_CDB20	CBD	bulk_rna_seq	Mus musculus
GSE279836	PFOA	bulk_rna_seq	Homo sapiens
GSE280174_female	BPA	bulk_rna_seq	Mus musculus
GSE280174_male	BPA	bulk_rna_seq	Mus musculus
GSE38234_BPA_ECC1	BPA	bulk_rna_seq	Homo sapiens
GSE38234_BPA_T47D	BPA	bulk_rna_seq	Homo sapiens
GSE38234_Estradiol_ECC1	Estradiol	bulk_rna_seq	Homo sapiens
GSE38234_Estradiol_T47D	Estradiol	bulk_rna_seq	Homo sapiens
GSE44387	BPA	micro_array	Mus musculus
GSE4650_12h	BPA	micro_array	Mus musculus
GSE4650_3h	BPA	micro_array	Mus musculus
GSE4650_6h	BPA	micro_array	Mus musculus
GSE50527_3M	BPA	micro_array	Homo sapiens
GSE50527_8h	BPA	micro_array	Homo sapiens
GSE50705_0.05pM	Estradiol	micro_array	Homo sapiens
GSE50705_0.1pM	Estradiol	micro_array	Homo sapiens
GSE50705_0.5pM	Estradiol	micro_array	Homo sapiens
GSE50705_1.56uM	BPA	micro_array	Homo sapiens
GSE50705_1.95pM	BPA	micro_array	Homo sapiens
GSE50705_1.95uM	BPA	micro_array	Homo sapiens
GSE50705_1000nM	BPA	micro_array	Homo sapiens
GSE50705_100nM	Estradiol	micro_array	Homo sapiens
GSE50705_100pM	Estradiol	micro_array	Homo sapiens
GSE50705_10nM	Estradiol	micro_array	Homo sapiens
GSE50705_10pM	Estradiol	micro_array	Homo sapiens
GSE50705_12.5uM	BPA	micro_array	Homo sapiens
GSE50705_125nM	BPA	micro_array	Homo sapiens
GSE50705_15.6nM	BPA	micro_array	Homo sapiens
GSE50705_1nM	Estradiol	micro_array	Homo sapiens
GSE50705_1pM	Estradiol	micro_array	Homo sapiens
GSE50705_1uM	Estradiol	micro_array	Homo sapiens
GSE50705_20pM	Estradiol	micro_array	Homo sapiens
GSE50705_250nM	BPA	micro_array	Homo sapiens
GSE50705_250pM	BPA	micro_array	Homo sapiens
GSE50705_25uM	BPA	micro_array	Homo sapiens
GSE50705_2pM	Estradiol	micro_array	Homo sapiens
GSE50705_2uM	BPA	micro_array	Homo sapiens
GSE50705_3.125uM	BPA	micro_array	Homo sapiens
GSE50705_31.25nM	BPA	micro_array	Homo sapiens
GSE50705_31.25pM	BPA	micro_array	Homo sapiens
GSE50705_40pM	Estradiol	micro_array	Homo sapiens
GSE50705_4pM	Estradiol	micro_array	Homo sapiens
GSE50705_4uM	BPA	micro_array	Homo sapiens
GSE50705_500nM	BPA	micro_array	Homo sapiens
GSE50705_50uM	BPA	micro_array	Homo sapiens
GSE50705_6.25uM	BPA	micro_array	Homo sapiens
GSE50705_60pM	Estradiol	micro_array	Homo sapiens
GSE50705_62.5nM	BPA	micro_array	Homo sapiens
GSE50705_6pM	Estradiol	micro_array	Homo sapiens
GSE50705_7.81nM	BPA	micro_array	Homo sapiens
GSE50705_80pM	Estradiol	micro_array	Homo sapiens
GSE50705_8pM	Estradiol	micro_array	Homo sapiens
GSE50705_8uM	BPA	micro_array	Homo sapiens
GSE5483	Estradiol	micro_array	Mus musculus
GSE57571	CBD	micro_array	Homo sapiens
GSE57823_Old	THC	bulk_rna_seq	Mus musculus
GSE57823_Young	THC	micro_array	Mus musculus
GSE58324	Estradiol	micro_array	Homo sapiens
GSE58516_BPA	BPA	micro_array	Homo sapiens
GSE58516_Estradiol	Estradiol	micro_array	Homo sapiens
GSE61921_24hr	Estradiol	micro_array	Mus musculus
GSE61921_2hr	Estradiol	micro_array	Mus musculus
GSE63852_.5mg_BPA_liver	BPA	micro_array	Mus musculus
GSE63852_50mg_BPA_liver	BPA	micro_array	Mus musculus
GSE64636	Estradiol	micro_array	Rattus norvegicus
GSE69819_casiene	Estradiol	bulk_rna_seq	Rattus norvegicus
GSE69819_soy	Estradiol	bulk_rna_seq	Rattus norvegicus
GSE70689_CBD_NoLPS	CBD	micro_array	Mus musculus
GSE70689_CBD_wLPS	CBD	micro_array	Mus musculus
GSE70689_THC_NoLPS	THC	micro_array	Mus musculus
GSE70689_THC_wLPS	THC	micro_array	Mus musculus
GSE71489	BPA	micro_array	Mus musculus
GSE85350	BPA	micro_array	Homo sapiens
GSE85350_100pM	Estradiol	micro_array	Homo sapiens
GSE85350_10pM	Estradiol	micro_array	Homo sapiens
GSE85350_1nM	Estradiol	micro_array	Homo sapiens
GSE86923	BPA	micro_array	Mus musculus
GSE9796_PPAR_1mg	PFOA	micro_array	Mus musculus
GSE9796_PPAR_3mg	PFOA	micro_array	Mus musculus
GSE9796_WT_1mg	PFOA	micro_array	Mus musculus
GSE9796_WT_3mg	PFOA	micro_array	Mus musculus
