# Supplementary material for: Comparative analysis of 105 datasets across species and tissues reveals higher variability in transcriptomic responses to THC than CBD
Source: Research Square preprint supplement (doi:10.21203/rs.3.rs-6857614/v1), 2025-06-13
Supplement: Supplementary file 8 [file 87ff79c30969541203cc49c5.xlsx]

## Sheet: THC upregulated pathways
Term	Freq	Source
Metabolic pathways Homo sapiens hsa01100	2	DEG_GSE244644_FetalAorta; DEG_GSE273695_Blood_Female_LPS
positive regulation of transcription from RNA polymerase II promoter (GO:0045944)	2	DEG_GSE213734_vehicle; DEG_GSE235969_Female_Old_5d
rRNA processing (GO:0006364)	2	DEG_GSE181487; DEG_GSE189821_Female_Amy
Aldosterone synthesis and secretion Homo sapiens hsa04925	1	DEG_GSE273695_Brain_Male_LPS
AMPK signaling pathway Homo sapiens hsa04152	1	DEG_GSE273695_Brain_Male_LPS
axon guidance (GO:0007411)	1	DEG_GSE273695_Brain_Male_LPS
Axon guidance Homo sapiens hsa04360	1	DEG_GSE273695_Brain_Male_LPS
axonogenesis (GO:0007409)	1	DEG_GSE273695_Brain_Male_LPS
BMP signaling pathway (GO:0030509)	1	DEG_GSE116813_vehicle
brain development (GO:0007420)	1	DEG_GSE273695_Brain_Male_LPS
calcium ion-regulated exocytosis of neurotransmitter (GO:0048791)	1	DEG_GSE273695_Brain_Male_LPS
Calcium signaling pathway Homo sapiens hsa04020	1	DEG_GSE273695_Brain_Male_LPS
cAMP signaling pathway Homo sapiens hsa04024	1	DEG_GSE273695_Brain_Male_LPS
Cell adhesion molecules (CAMs) Homo sapiens hsa04514	1	DEG_GSE273695_Brain_Male_LPS
cellular response to calcium ion (GO:0071277)	1	DEG_GSE273695_Brain_Male_LPS
cerebral cortex development (GO:0021987)	1	DEG_GSE273695_Brain_Male_LPS
cGMP-PKG signaling pathway Homo sapiens hsa04022	1	DEG_GSE273695_Brain_Male_LPS
chemical synaptic transmission (GO:0007268)	1	DEG_GSE273695_Brain_Male_LPS
Choline metabolism in cancer Homo sapiens hsa05231	1	DEG_GSE273695_Brain_Male_LPS
Cholinergic synapse Homo sapiens hsa04725	1	DEG_GSE273695_Brain_Male_LPS
Circadian entrainment Homo sapiens hsa04713	1	DEG_GSE273695_Brain_Male_LPS
Circadian rhythm Homo sapiens hsa04710	1	DEG_GSE273695_Brain_Male_LPS
Cocaine addiction Homo sapiens hsa05030	1	DEG_GSE273695_Brain_Male_LPS
Colorectal cancer Homo sapiens hsa05210	1	DEG_GSE273695_Brain_Male_LPS
Dopaminergic synapse Homo sapiens hsa04728	1	DEG_GSE273695_Brain_Male_LPS
Dorso-ventral axis formation Homo sapiens hsa04320	1	DEG_GSE273695_Brain_Male_LPS
Endocytosis Homo sapiens hsa04144	1	DEG_GSE273695_Brain_Male_LPS
Endometrial cancer Homo sapiens hsa05213	1	DEG_GSE273695_Brain_Male_LPS
epidermal growth factor receptor signaling pathway (GO:0007173)	1	DEG_GSE273695_Brain_Male_LPS
ErbB signaling pathway Homo sapiens hsa04012	1	DEG_GSE273695_Brain_Male_LPS
ERBB2 signaling pathway (GO:0038128)	1	DEG_GSE273695_Brain_Male_LPS
Estrogen signaling pathway Homo sapiens hsa04915	1	DEG_GSE273695_Brain_Male_LPS
extracellular matrix organization (GO:0030198)	1	DEG_GSE116813_vehicle
Focal adhesion Homo sapiens hsa04510	1	DEG_GSE273695_Brain_Male_LPS
FoxO signaling pathway Homo sapiens hsa04068	1	DEG_GSE273695_Brain_Male_LPS
GABAergic synapse Homo sapiens hsa04727	1	DEG_GSE273695_Brain_Male_LPS
Gap junction Homo sapiens hsa04540	1	DEG_GSE273695_Brain_Male_LPS
Glucagon signaling pathway Homo sapiens hsa04922	1	DEG_GSE273695_Brain_Male_LPS
Glutamatergic synapse Homo sapiens hsa04724	1	DEG_GSE273695_Brain_Male_LPS
GnRH signaling pathway Homo sapiens hsa04912	1	DEG_GSE273695_Brain_Male_LPS
heterophilic cell-cell adhesion via plasma membrane cell adhesion molecules (GO:0007157)	1	DEG_GSE273695_Brain_Male_LPS
Insulin resistance Homo sapiens hsa04931	1	DEG_GSE273695_Brain_Male_LPS
Insulin secretion Homo sapiens hsa04911	1	DEG_GSE273695_Brain_Male_LPS
Insulin signaling pathway Homo sapiens hsa04910	1	DEG_GSE273695_Brain_Male_LPS
Long-term potentiation Homo sapiens hsa04720	1	DEG_GSE273695_Brain_Male_LPS
Longevity regulating pathway - mammal Homo sapiens hsa04211	1	DEG_GSE273695_Brain_Male_LPS
Longevity regulating pathway - multiple species Homo sapiens hsa04213	1	DEG_GSE273695_Brain_Male_LPS
membrane depolarization during action potential (GO:0086010)	1	DEG_GSE273695_Brain_Male_LPS
membrane organization (GO:0061024)	1	DEG_GSE273695_Brain_Male_LPS
negative regulation of transcription from RNA polymerase II promoter (GO:0000122)	1	DEG_GSE273695_Brain_Male_LPS
nervous system development (GO:0007399)	1	DEG_GSE273695_Brain_Male_LPS
neuron cell-cell adhesion (GO:0007158)	1	DEG_GSE273695_Brain_Male_LPS
neuron development (GO:0048666)	1	DEG_GSE273695_Brain_Male_LPS
neuron migration (GO:0001764)	1	DEG_GSE273695_Brain_Male_LPS
neuron projection development (GO:0031175)	1	DEG_GSE273695_Brain_Male_LPS
neuronal action potential (GO:0019228)	1	DEG_GSE273695_Brain_Male_LPS
neurotransmitter secretion (GO:0007269)	1	DEG_GSE273695_Brain_Male_LPS
Neurotrophin signaling pathway Homo sapiens hsa04722	1	DEG_GSE273695_Brain_Male_LPS
Nicotine addiction Homo sapiens hsa05033	1	DEG_GSE273695_Brain_Male_LPS
Oxytocin signaling pathway Homo sapiens hsa04921	1	DEG_GSE273695_Brain_Male_LPS
p53 signaling pathway Homo sapiens hsa04115	1	DEG_GSE273695_Brain_Male_LPS
Pathways in cancer Homo sapiens hsa05200	1	DEG_GSE273695_Brain_Male_LPS
peptidyl-tyrosine phosphorylation (GO:0018108)	1	DEG_GSE273695_Brain_Male_LPS
Phosphatidylinositol signaling system Homo sapiens hsa04070	1	DEG_GSE273695_Brain_Male_LPS
Phospholipase D signaling pathway Homo sapiens hsa04072	1	DEG_GSE273695_Brain_Male_LPS
platelet degranulation (GO:0002576)	1	DEG_GSE116813_vehicle
positive regulation of apoptotic process (GO:0043065)	1	DEG_GSE273695_Brain_Male_LPS
positive regulation of excitatory postsynaptic potential (GO:2000463)	1	DEG_GSE273695_Brain_Male_LPS
positive regulation of neuron projection development (GO:0010976)	1	DEG_GSE273695_Brain_Male_LPS
positive regulation of pathway-restricted SMAD protein phosphorylation (GO:0010862)	1	DEG_GSE116813_vehicle
positive regulation of sequence-specific DNA binding transcription factor activity (GO:0051091)	1	DEG_GSE273695_Brain_Male_LPS
presynaptic membrane assembly (GO:0097105)	1	DEG_GSE273695_Brain_Male_LPS
Progesterone-mediated oocyte maturation Homo sapiens hsa04914	1	DEG_GSE273695_Brain_Male_LPS
Prolactin signaling pathway Homo sapiens hsa04917	1	DEG_GSE273695_Brain_Male_LPS
Prostate cancer Homo sapiens hsa05215	1	DEG_GSE273695_Brain_Male_LPS
protein autophosphorylation (GO:0046777)	1	DEG_GSE273695_Brain_Male_LPS
protein homooligomerization (GO:0051260)	1	DEG_GSE116813_vehicle
protein phosphorylation (GO:0006468)	1	DEG_GSE273695_Brain_Male_LPS
Rap1 signaling pathway Homo sapiens hsa04015	1	DEG_GSE273695_Brain_Male_LPS
Ras signaling pathway Homo sapiens hsa04014	1	DEG_GSE273695_Brain_Male_LPS
regulation of autophagy (GO:0010506)	1	DEG_GSE273695_Brain_Male_LPS
regulation of heart rate (GO:0002027)	1	DEG_GSE273695_Brain_Male_LPS
regulation of membrane potential (GO:0042391)	1	DEG_GSE273695_Brain_Male_LPS
regulation of synaptic transmission, glutamatergic (GO:0051966)	1	DEG_GSE273695_Brain_Male_LPS
Renin secretion Homo sapiens hsa04924	1	DEG_GSE273695_Brain_Male_LPS
response to hypoxia (GO:0001666)	1	DEG_GSE273695_Brain_Male_LPS
Retrograde endocannabinoid signaling Homo sapiens hsa04723	1	DEG_GSE273695_Brain_Male_LPS
single organismal cell-cell adhesion (GO:0016337)	1	DEG_GSE273695_Brain_Male_LPS
skeletal system development (GO:0001501)	1	DEG_GSE116813_vehicle
synapse assembly (GO:0007416)	1	DEG_GSE273695_Brain_Male_LPS
Thyroid hormone signaling pathway Homo sapiens hsa04919	1	DEG_GSE273695_Brain_Male_LPS
Type II diabetes mellitus Homo sapiens hsa04930	1	DEG_GSE273695_Brain_Male_LPS
Vascular smooth muscle contraction Homo sapiens hsa04270	1	DEG_GSE273695_Brain_Male_LPS
vesicle fusion (GO:0006906)	1	DEG_GSE273695_Brain_Male_LPS
Wnt signaling pathway Homo sapiens hsa04310	1	DEG_GSE273695_Brain_Male_LPS

## Sheet: THC downregulated pathways
Term	Freq	Source
Neuroactive ligand-receptor interaction Homo sapiens hsa04080	1	DEG_GSE189821_Female_Amy
neuropeptide signaling pathway (GO:0007218)	1	DEG_GSE189821_Female_Amy
nuclear-transcribed mRNA catabolic process, nonsense-mediated decay (GO:0000184)	1	DEG_GSE189821_Female_Amy
Ribosome Homo sapiens hsa03010	1	DEG_GSE189821_Female_Amy
rRNA processing (GO:0006364)	1	DEG_GSE189821_Female_Amy
SRP-dependent cotranslational protein targeting to membrane (GO:0006614)	1	DEG_GSE189821_Female_Amy
translation (GO:0006412)	1	DEG_GSE189821_Female_Amy
translational initiation (GO:0006413)	1	DEG_GSE189821_Female_Amy
viral transcription (GO:0019083)	1	DEG_GSE189821_Female_Amy
