# Supplementary material for: Comparative analysis of 105 datasets across species and tissues reveals higher variability in transcriptomic responses to THC than CBD
Source: Research Square preprint supplement (doi:10.21203/rs.3.rs-6857614/v1), 2025-06-13
Supplement: Supplementary file 10 [file 99aedc3313611079c3d46e5a.xlsx]

## Sheet: Cannabinoid Metadata
ID	Categorization	Species	GSE_Number	Conditions	Compound	Tissue	Tissue_categorization	Exposure_Route	Platform	Paper_Link
GSE116813_DISC1	THC	Mus musculus	GSE116813	DISC1 (3) vs. DISC1 + THC (3)	THC	Brain hippocampus	Brain	Subcutaneous injection	Bulk RNA Sequencing	https://www.ncbi.nlm.nih.gov/pubmed/30219209
GSE116813_vehicle	THC	Mus musculus	GSE116813	Vehicle (3) vs. THC (3)	THC	Brain hippocampus	Brain	Subcutaneous injection	Bulk RNA Sequencing	https://www.ncbi.nlm.nih.gov/pubmed/30219209
GSE121439	THC	Macaca mulatta	GSE121439	SIV-infected (7) vs. SIV-infected + THC (5)	THC	Colon tissue	Digestive	Intravenous injection	Microarray	https://www.ncbi.nlm.nih.gov/pubmed/31114576
GSE125259_drug	Cannabis	Homo sapiens	GSE125259	Drug (4) vs. Drug + CSE (4)	Cannabis	Airway epithelial cells (Calu-3 cell line)	Lung	Cannabis use	Bulk RNA Sequencing	https://www.ncbi.nlm.nih.gov/pubmed/31984210
GSE125259_vehicle	Cannabis	Homo sapiens	GSE125259	Vehicle (4) vs. Vehicle + CSE (4)	Cannabis	Airway epithelial cells (Calu-3 cell line)	Lung	Cannabis use	Bulk RNA Sequencing	https://www.ncbi.nlm.nih.gov/pubmed/31984210
GSE131565	CBD	Homo sapiens	GSE131565	Vehicle (3) vs. CBD (3)	CBD	Integument (primary human keratinocytes)	Skin	In medium	Bulk RNA Sequencing	https://www.ncbi.nlm.nih.gov/pubmed/31518892
GSE150723	THC	Macaca mulatta	GSE150723	SIV-infected (7) vs. SIV-infected + THC (3)	THC	Oropharyngeal tissue	Digestive	Intravenous injection	Bulk RNA Sequencing	https://www.ncbi.nlm.nih.gov/pubmed/32630206
GSE151512_12h	CBD	Homo sapiens	GSE151512	12hr Vehicle (4) vs. CBD (4)	CBD	Neuroblastoma (SK-N-BE(2) cell line)	Brain; Cancer	In medium	Bulk RNA Sequencing	https://www.ncbi.nlm.nih.gov/pubmed/35753663
GSE151512_24h	CBD	Homo sapiens	GSE151512	24hr Vehicle (4) vs. CBD (4)	CBD	Neuroblastoma (SK-N-BE(2) cell line)	Brain; Cancer	In medium	Bulk RNA Sequencing	https://www.ncbi.nlm.nih.gov/pubmed/35753663
GSE151512_3h	CBD	Homo sapiens	GSE151512	3hr Vehicle (4) vs. CBD (4)	CBD	Neuroblastoma (SK-N-BE(2) cell line)	Brain; Cancer	In medium	Bulk RNA Sequencing	https://www.ncbi.nlm.nih.gov/pubmed/35753663
GSE151512_6h	CBD	Homo sapiens	GSE151512	6hr Vehicle (4) vs. CBD (4)	CBD	Neuroblastoma (SK-N-BE(2) cell line)	Brain; Cancer	In medium	Bulk RNA Sequencing	https://www.ncbi.nlm.nih.gov/pubmed/35753663
GSE152088	CBD	Homo sapiens	GSE152088	Vehicle (3) vs. CBD (3)	CBD	Integument (HOK-16B cell line)	Skin	In medium	Bulk RNA Sequencing	https://www.ncbi.nlm.nih.gov/pubmed/34269108
GSE158188_Female	THC	Rattus norvegicus	GSE158188	Female Vehicle (4) vs. THC (4)	THC	Brain nucleus accumbens shell	Brain	Intraperitoneal injection	Bulk RNA Sequencing	https://www.ncbi.nlm.nih.gov/pubmed/34436576
GSE158188_Male	THC	Rattus norvegicus	GSE158188	Male Vehicle (4) vs. THC (4)	THC	Brain nucleus accumbens shell	Brain	Intraperitoneal injection	Bulk RNA Sequencing	https://www.ncbi.nlm.nih.gov/pubmed/34436576
GSE168797_Mock_CBD	CBD	Homo sapiens	GSE168797	Mock DMSO (6) vs. CBD (3)	CBD	Lung aveolar cell (A549 cells ACE2 overexpression)	Lung	In medium	Bulk RNA Sequencing	https://www.ncbi.nlm.nih.gov/pubmed/33758843
GSE168797_Mock_CBDV	CBD	Homo sapiens	GSE168797	Mock DMSO (6) vs. CBDV (3)	CBDV	Lung aveolar cell (A549 cells ACE2 overexpression)	Lung	In medium	Bulk RNA Sequencing	https://www.ncbi.nlm.nih.gov/pubmed/33758843
GSE168797_SARS_CBD	CBD	Homo sapiens	GSE168797	SARS-CoV-2 DMSO (6) vs. CBD (3)	CBD	Lung aveolar cell (A549 cells ACE2 overexpression)	Lung	In medium	Bulk RNA Sequencing	https://www.ncbi.nlm.nih.gov/pubmed/33758843
GSE168797_SARS_CBDV	CBD	Homo sapiens	GSE168797	SARS-CoV-2 DMSO (6) vs. CBDV (3)	CBDV	Lung aveolar cell (A549 cells ACE2 overexpression)	Lung	In medium	Bulk RNA Sequencing	https://www.ncbi.nlm.nih.gov/pubmed/33758843
GSE179661_HepG2	CBD	Homo sapiens	GSE179661	HepG2 Vehicle (2) vs. CBD (2)	CBD	Liver (HepG2 cell line)	Liver	In medium	Bulk RNA Sequencing	https://www.ncbi.nlm.nih.gov/pubmed/34350183
GSE179661_MHCC97H	CBD	Homo sapiens	GSE179661	MHCC97H Vehicle (2) vs. CBD (2)	CBD	Liver (MHCC97H cell line)	Liver	In medium	Bulk RNA Sequencing	https://www.ncbi.nlm.nih.gov/pubmed/34350183
GSE179930	Cannabis	Homo sapiens	GSE179930	Vehicle (93) vs. Cannabis (21)	Cannabis	Placenta	Placenta	Cannabis use	Bulk RNA Sequencing	https://www.ncbi.nlm.nih.gov/pubmed/34782458
GSE181487	THC	Macaca mulatta	GSE181487	SIV-infected (7) vs. SIV-infected + THC (3)	THC	Gingival tissue	Oral	Intravenous injection	Bulk RNA Sequencing	https://www.ncbi.nlm.nih.gov/pubmed/34954656
GSE189821_Female_Amy	THC	Mus musculus	GSE189821	Female Amy Vehicle (6) vs. THC (6)	THC	Brain amygdala	Brain	Intraperitoneal injection	Bulk RNA Sequencing	https://www.ncbi.nlm.nih.gov/pubmed/35995972
GSE189821_Female_DMS	THC	Mus musculus	GSE189821	Female DMS Vehicle (6) vs. THC (6)	THC	Brain dorsolateral striatum	Brain	Intraperitoneal injection	Bulk RNA Sequencing	https://www.ncbi.nlm.nih.gov/pubmed/35995972
GSE189821_Female_Nac	THC	Mus musculus	GSE189821	Female Nac Vehicle (6) vs. THC (6)	THC	Brain nucleus accumbens	Brain	Intraperitoneal injection	Bulk RNA Sequencing	https://www.ncbi.nlm.nih.gov/pubmed/35995972
GSE189821_Female_PFC	THC	Mus musculus	GSE189821	Female PFC Vehicle (6) vs. THC (6)	THC	Brain prefrontal cortex	Brain	Intraperitoneal injection	Bulk RNA Sequencing	https://www.ncbi.nlm.nih.gov/pubmed/35995972
GSE189821_Female_VTA	THC	Mus musculus	GSE189821	Female VTA Vehicle (6) vs. THC (6)	THC	Brain ventral tegmental area	Brain	Intraperitoneal injection	Bulk RNA Sequencing	https://www.ncbi.nlm.nih.gov/pubmed/35995972
GSE189821_Male_Amy	THC	Mus musculus	GSE189821	Male Amy Vehicle (6) vs. THC (6)	THC	Brain amygdala	Brain	Intraperitoneal injection	Bulk RNA Sequencing	https://www.ncbi.nlm.nih.gov/pubmed/35995972
GSE189821_Male_DMS	THC	Mus musculus	GSE189821	Male DMS Vehicle (6) vs. THC (6)	THC	Brain dorsolateral striatum	Brain	Intraperitoneal injection	Bulk RNA Sequencing	https://www.ncbi.nlm.nih.gov/pubmed/35995972
GSE189821_Male_Nac	THC	Mus musculus	GSE189821	Male Nac Vehicle (6) vs. THC (6)	THC	Brain nucleus accumbens	Brain	Intraperitoneal injection	Bulk RNA Sequencing	https://www.ncbi.nlm.nih.gov/pubmed/35995972
GSE189821_Male_PFC	THC	Mus musculus	GSE189821	Male PFC Vehicle (6) vs. THC (6)	THC	Brain prefrontal cortex	Brain	Intraperitoneal injection	Bulk RNA Sequencing	https://www.ncbi.nlm.nih.gov/pubmed/35995972
GSE189821_Male_VTA	THC	Mus musculus	GSE189821	Male VTA Vehicle (5) vs. THC (6)	THC	Brain ventral tegmental area	Brain	Intraperitoneal injection	Bulk RNA Sequencing	https://www.ncbi.nlm.nih.gov/pubmed/35995972
GSE198578	THC	Homo sapiens	GSE198578	Vehicle (2) vs. THC (2)	THC	in vitro iPSC engineered heart tissue	Heart	In medium	Bulk RNA Sequencing	https://www.ncbi.nlm.nih.gov/pubmed/35489334
GSE201508_cGAMP	CBD	Homo sapiens	Skeletal muscle myotube (C2C12 cell line)	2'-3'-cGAMP (3) vs. 2'-3'-cGAMP + CBD (3)	CBD	Monocyte (THP-1 cell line)	Immune	In medium	Bulk RNA Sequencing	https://www.ncbi.nlm.nih.gov/pubmed/36248834
GSE201508_enthanol	CBD	Homo sapiens	GSE201508	Enthanol (3) vs. CBD (3)	CBD	Monocyte (THP-1 cell line)	Immune	In medium	Bulk RNA Sequencing	https://www.ncbi.nlm.nih.gov/pubmed/36248834
GSE207518	THC	Macaca mulatta	GSE207518	SIV-infected (6) vs. SIV-infected + THC (6)	THC	Brain basal ganglia	Brain	Intravenous injection	Bulk RNA Sequencing	https://www.ncbi.nlm.nih.gov/pubmed/36890518
GSE213734_LPS	THC	Mus musculus	GSE213734	LPS (3) vs. LPS + THC (3)	THC	Brain microglia	Brain	Intraperitoneal injection	Bulk RNA Sequencing	https://www.ncbi.nlm.nih.gov/pubmed/35750512
GSE213734_vehicle	THC	Mus musculus	GSE213734	Vehicle (3) vs. THC (3)	THC	Brain microglia	Brain	Intraperitoneal injection	Bulk RNA Sequencing	https://www.ncbi.nlm.nih.gov/pubmed/35750512
GSE216112	THC	Macaca mulatta	GSE216112	Vehicle (5) vs. THC (5)	THC	Placenta	Placenta	Oral ingestion	Bulk RNA Sequencing	https://www.ncbi.nlm.nih.gov/pubmed/36424495
GSE226955_EpiLC	THC	Mus musculus	GSE226955	EpiLC Mock (3) vs. THC (3)	THC	Epiblast-like cells (EpiLCs)	Stem cell	In medium	Bulk RNA Sequencing	https://www.ncbi.nlm.nih.gov/pubmed/38150302
GSE226955_ESC	THC	Mus musculus	GSE226955	ESC Mock (3) vs. THC (3)	THC	Embryonic stem cells (ESCs)	Stem cell	In medium	Bulk RNA Sequencing	https://www.ncbi.nlm.nih.gov/pubmed/38150302
GSE226955_PGCLC	THC	Mus musculus	GSE226955	PGCLC Mock (3) vs. THC (3)	THC	Primordial germ cells-like cells (PGCLCs)	Stem cell	In medium	Bulk RNA Sequencing	https://www.ncbi.nlm.nih.gov/pubmed/38150302
GSE232624_EtOH0.25_CBD0.75_12h	CBD	Homo sapiens	GSE232624	12h 0.25 EtOH (2) vs. 0.25 EtOH + 0.75 CBD (3)	CBD	Dermal fibroblast	Skin	In medium	Bulk RNA Sequencing	https://www.ncbi.nlm.nih.gov/pubmed/39466591
GSE232624_EtOH0.25_CBD0.75_6h	CBD	Homo sapiens	GSE232624	6h 0.25 EtOH (2) vs. 0.25 EtOH + 0.75 CBD (3)	CBD	Dermal fibroblast	Skin	In medium	Bulk RNA Sequencing	https://www.ncbi.nlm.nih.gov/pubmed/39466591
GSE232624_EtOH0.75_CBD0.75_12h	CBD	Homo sapiens	GSE232624	12h 0.75 EtOH (2) vs. 0.75 EtOH + 0.75 CBD (2)	CBD	Dermal fibroblast	Skin	In medium	Bulk RNA Sequencing	https://www.ncbi.nlm.nih.gov/pubmed/39466591
GSE232624_EtOH0.75_CBD0.75_6h	CBD	Homo sapiens	GSE232624	6h 0.75 EtOH (3) vs. 0.75 EtOH + 0.75 CBD (3)	CBD	Dermal fibroblast	Skin	In medium	Bulk RNA Sequencing	https://www.ncbi.nlm.nih.gov/pubmed/39466591
GSE232624_Veh_CBD0.75_12h	CBD	Homo sapiens	GSE232624	12h Ctrl (3) vs. 0.75 CBD (3)	CBD	Dermal fibroblast	Skin	In medium	Bulk RNA Sequencing	https://www.ncbi.nlm.nih.gov/pubmed/39466591
GSE232624_Veh_CBD0.75_6h	CBD	Homo sapiens	GSE232624	6h Ctrl (3) vs. 0.75 CBD (2)	CBD	Dermal fibroblast	Skin	In medium	Bulk RNA Sequencing	https://www.ncbi.nlm.nih.gov/pubmed/39466591
GSE232624_Veh_CBD3_12h	CBD	Homo sapiens	GSE232624	12h Ctrl (3) vs. 3 CBD (3)	CBD	Dermal fibroblast	Skin	In medium	Bulk RNA Sequencing	https://www.ncbi.nlm.nih.gov/pubmed/39466591
GSE232624_Veh_CBD3_6h	CBD	Homo sapiens	GSE232624	6h Ctrl (3) vs. 3 CBD (2)	CBD	Dermal fibroblast	Skin	In medium	Bulk RNA Sequencing	https://www.ncbi.nlm.nih.gov/pubmed/39466591
GSE235310_LPS	CBD	Homo sapiens	GSE235310	LPS (3) vs. LPS + CBD (3)	CBD	Monocyte-derived dendritic cell line	Immune	In medium	Bulk RNA Sequencing	https://www.ncbi.nlm.nih.gov/pubmed/37680639
GSE235310_Veh	CBD	Homo sapiens	GSE235310	Vehicle (4) vs. CBD (3)	CBD	Monocyte-derived dendritic cell line	Immune	In medium	Bulk RNA Sequencing	https://www.ncbi.nlm.nih.gov/pubmed/37680639
GSE235969_Female_Old_5d	THC	Mus musculus	GSE235969	Old Female 5d Vehicle (4) vs. THC (4)	THC	Brain hippocampus	Brain	Intraperitoneal injection	Bulk RNA Sequencing	https://www.ncbi.nlm.nih.gov/pubmed/37534036
GSE235969_Female_Old_5wk	THC	Mus musculus	GSE235969	Old Female 5wk Vehicle (4) vs. THC (4)	THC	Brain hippocampus	Brain	Intraperitoneal injection	Bulk RNA Sequencing	https://www.ncbi.nlm.nih.gov/pubmed/37534036
GSE235969_Male_Young_5wk	THC	Mus musculus	GSE235969	Young Male 5wk Vehicle (4) vs. THC (4)	THC	Brain hippocampus	Brain	Intraperitoneal injection	Bulk RNA Sequencing	https://www.ncbi.nlm.nih.gov/pubmed/37534036
GSE240225_THC	THC	Rattus norvegicus	GSE240225	LPS (2) vs. THC + LPS (2)	THC	Enteric glial cell (EGC/PK060399egfr cell lines)	Digestive	In medium	Bulk RNA Sequencing	https://www.ncbi.nlm.nih.gov/pubmed/37834076
GSE240225_THC-COOH	THC	Rattus norvegicus	GSE240225	LPS (2) vs. THC-COOH + LPS (2)	THC-COOH	Enteric glial cell (EGC/PK060399egfr cell lines)	Digestive	In medium	Bulk RNA Sequencing	https://www.ncbi.nlm.nih.gov/pubmed/37834076
GSE242079_CBD3	CBD	Rattus norvegicus	GSE242079	Vehicle (7) vs. 3 CBD (6)	CBD	Heart	Heart	Intraperitoneal injection	Bulk RNA Sequencing	https://www.ncbi.nlm.nih.gov/pubmed/38358335
GSE242079_CBD30	CBD	Rattus norvegicus	GSE242079	Vehicle (7) vs. 30 CBD (5)	CBD	Heart	Heart	Intraperitoneal injection	Bulk RNA Sequencing	https://www.ncbi.nlm.nih.gov/pubmed/38358335
GSE242892_16p11dup	THC	Mus musculus	GSE242892	16p11dup Vehicle (4) vs. THC (4)	THC	Brain mPFC microglia	Brain	Subcutaneous injection	Bulk RNA Sequencing	https://www.ncbi.nlm.nih.gov/pubmed/37880248
GSE242892_WT	THC	Mus musculus	GSE242892	WT Vehicle (6) vs. THC (4)	THC	Brain mPFC microglia	Brain	Subcutaneous injection	Bulk RNA Sequencing	https://www.ncbi.nlm.nih.gov/pubmed/37880248
GSE244644_FetalAorta	THC	Macaca mulatta	GSE244644	Fetal Aorta Vehicle (5) vs. THC (5)	THC	Endothelial cells (Fetal Aorta)	Vasculature	in utero exposure	Bulk RNA Sequencing	https://www.ncbi.nlm.nih.gov/pubmed/39028280
GSE244644_UmbilicalArtery	THC	Macaca mulatta	GSE244644	Umbilical Artery Vehicle (5) vs. THC (5)	THC	Endothelial cells (Umbilical Artery)	Vasculature	in utero exposure	Bulk RNA Sequencing	https://www.ncbi.nlm.nih.gov/pubmed/39028280
GSE244644_UmbilicalVein	THC	Macaca mulatta	GSE244644	Umbilical Vein Vehicle (5) vs. THC (5)	THC	Endothelial cells (Umbilical Vein)	Vasculature	in utero exposure	Bulk RNA Sequencing	https://www.ncbi.nlm.nih.gov/pubmed/39028280
GSE261716_CBD0.2_28d	CBD	Mus musculus	GSE261716	28d Ctrl (6) vs. 0.2 CBD (6)	CBD	Liver	Liver	Intraperitoneal injection	Bulk RNA Sequencing	Not available
GSE261716_CBD0.2_2d	CBD	Mus musculus	GSE261716	2d Ctrl (6) vs. 0.2 CBD (6)	CBD	Liver	Liver	Intraperitoneal injection	Bulk RNA Sequencing	Not available
GSE261716_CBD10_28d	CBD	Mus musculus	GSE261716	28d Ctrl (6) vs. 10 CBD (6)	CBD	Liver	Liver	Intraperitoneal injection	Bulk RNA Sequencing	Not available
GSE261716_CBD10_2d	CBD	Mus musculus	GSE261716	2d Ctrl (6) vs. 10 CBD (6)	CBD	Liver	Liver	Intraperitoneal injection	Bulk RNA Sequencing	Not available
GSE261716_CBD20_28d	CBD	Mus musculus	GSE261716	28d Ctrl (6) vs. 20 CBD (6)	CBD	Liver	Liver	Intraperitoneal injection	Bulk RNA Sequencing	Not available
GSE261716_CBD20_2d	CBD	Mus musculus	GSE261716	2d Ctrl (6) vs. 20 CBD (6)	CBD	Liver	Liver	Intraperitoneal injection	Bulk RNA Sequencing	Not available
GSE262437_AsympCO	CBD	Mus musculus	GSE262437	Asymptomatic Corn Oil (3) vs. CBD (3)	CBD	Brain	Brain	Oral ingestion	Bulk RNA Sequencing	https://www.ncbi.nlm.nih.gov/pubmed/38927480
GSE262437_SympCO	CBD	Mus musculus	GSE262437	Symptomatic Corn Oil (3) vs. CBD (3)	CBD	Brain	Brain	Oral ingestion	Bulk RNA Sequencing	https://www.ncbi.nlm.nih.gov/pubmed/38927480
GSE266113_mutCox15	CBD	Homo sapiens	GSE266113	Cox15_mut Vehicle (3) vs. CBD (3)	CBD	Primary skin fibroblasts (dermal fibroblat cell line)	Skin	In medium	Bulk RNA Sequencing	https://www.ncbi.nlm.nih.gov/pubmed/39231983
GSE266113_mutNdufs4	CBD	Homo sapiens	GSE266113	Ndufs4_mut Vehicle (3) vs. CBD (3)	CBD	Primary skin fibroblasts (dermal fibroblat cell line)	Skin	In medium	Bulk RNA Sequencing	https://www.ncbi.nlm.nih.gov/pubmed/39231983
GSE266113_WT	CBD	Homo sapiens	GSE266113	WT Vehicle (6) vs. CBD (6)	CBD	Primary skin fibroblasts (dermal fibroblat cell line)	Skin	In medium	Bulk RNA Sequencing	https://www.ncbi.nlm.nih.gov/pubmed/39231983
GSE270378_CBD0.325_24h	CBD	Mus musculus	GSE270378	24h Ctrl (3) vs. 0.325 CBD (3)	CBD	Hypothalamus (mHypoA-2/12 (Clu177) cell line)	Brain	In medium	Bulk RNA Sequencing	Not available
GSE270378_CBD0.325_6h	CBD	Mus musculus	GSE270378	6h Ctrl (3) vs. 0.325 CBD (3)	CBD	Hypothalamus (mHypoA-2/12 (Clu177) cell line)	Brain	In medium	Bulk RNA Sequencing	Not available
GSE270378_CBD0.75_24h	CBD	Mus musculus	GSE270378	24h Ctrl (3) vs. 0.75 CBD (3)	CBD	Hypothalamus (mHypoA-2/12 (Clu177) cell line)	Brain	In medium	Bulk RNA Sequencing	Not available
GSE270378_CBD0.75_6h	CBD	Mus musculus	GSE270378	6h Ctrl (3) vs. 0.75 CBD (3)	CBD	Hypothalamus (mHypoA-2/12 (Clu177) cell line)	Brain	In medium	Bulk RNA Sequencing	Not available
GSE270378_CBD1.5_24h	CBD	Mus musculus	GSE270378	24h Ctrl (3) vs. 1.5 CBD (3)	CBD	Hypothalamus (mHypoA-2/12 (Clu177) cell line)	Brain	In medium	Bulk RNA Sequencing	Not available
GSE270378_CBD1.5_6h	CBD	Mus musculus	GSE270378	6h Ctrl (3) vs. 1.5 CBD (3)	CBD	Hypothalamus (mHypoA-2/12 (Clu177) cell line)	Brain	In medium	Bulk RNA Sequencing	Not available
GSE270378_CBD3_24h	CBD	Mus musculus	GSE270378	24h Ctrl (3) vs. 3 CBD (3)	CBD	Hypothalamus (mHypoA-2/12 (Clu177) cell line)	Brain	In medium	Bulk RNA Sequencing	Not available
GSE270378_CBD3_6h	CBD	Mus musculus	GSE270378	6h Ctrl (3) vs. 3 CBD (3)	CBD	Hypothalamus (mHypoA-2/12 (Clu177) cell line)	Brain	In medium	Bulk RNA Sequencing	Not available
GSE272113_CBD	CBD	Mus musculus	GSE272113	DMSO (6) vs. CBD (6)	CBD	Skeletal muscle myotube (C2C12 cell line)	Muscle	In medium	Bulk RNA Sequencing	https://www.ncbi.nlm.nih.gov/pubmed/39289171
GSE272113_sCBD	CBD	Mus musculus	GSE272113	DMSO (6) vs. sCBD (6)	Synthetic CBD	Skeletal muscle myotube (C2C12 cell line)	Muscle	In medium	Bulk RNA Sequencing	https://www.ncbi.nlm.nih.gov/pubmed/39289171
GSE273695_Blood_Female_LPS	THC	Rattus norvegicus	GSE273695	Blood Female LPS Vehicle (3) vs. THC (3)	THC	Blood peripheral blood mononucelar cells	Blood	Intraperitoneal injection	Bulk RNA Sequencing	https://doi.org/10.1101/2024.08.05.606145
GSE273695_Blood_Female_Saline	THC	Rattus norvegicus	GSE273695	Blood Female Saline Vehicle (3) vs. THC (3)	THC	Blood peripheral blood mononucelar cells	Blood	Intraperitoneal injection	Bulk RNA Sequencing	https://doi.org/10.1101/2024.08.05.606145
GSE273695_Blood_Male_LPS	THC	Rattus norvegicus	GSE273695	Blood Memale LPS Vehicle (3) vs. THC (3)	THC	Blood peripheral blood mononucelar cells	Blood	Intraperitoneal injection	Bulk RNA Sequencing	https://doi.org/10.1101/2024.08.05.606145
GSE273695_Blood_Male_Saline	THC	Rattus norvegicus	GSE273695	Blood Memale Saline Vehicle (3) vs. THC (3)	THC	Blood peripheral blood mononucelar cells	Blood	Intraperitoneal injection	Bulk RNA Sequencing	https://doi.org/10.1101/2024.08.05.606145
GSE273695_Brain_Female_LPS	THC	Rattus norvegicus	GSE273695	Brain Female LPS Vehicle (3) vs. THC (3)	THC	Brain orbitofrontal cortex	Brain	Intraperitoneal injection	Bulk RNA Sequencing	https://doi.org/10.1101/2024.08.05.606145
GSE273695_Brain_Female_Saline	THC	Rattus norvegicus	GSE273695	Brain Female Saline Vehicle (3) vs. THC (3)	THC	Brain orbitofrontal cortex	Brain	Intraperitoneal injection	Bulk RNA Sequencing	https://doi.org/10.1101/2024.08.05.606145
GSE273695_Brain_Male_LPS	THC	Rattus norvegicus	GSE273695	Brain Memale LPS Vehicle (3) vs. THC (3)	THC	Brain orbitofrontal cortex	Brain	Intraperitoneal injection	Bulk RNA Sequencing	https://doi.org/10.1101/2024.08.05.606145
GSE273695_Brain_Male_Saline	THC	Rattus norvegicus	GSE273695	Brain Memale Saline Vehicle (3) vs. THC (3)	THC	Brain orbitofrontal cortex	Brain	Intraperitoneal injection	Bulk RNA Sequencing	https://doi.org/10.1101/2024.08.05.606145
GSE274435_DMSO_24h	CBD	Rattus norvegicus	GSE274435	24h DMSO (3) vs. CBD (3)	CBD	Brain primary hippocampal neurons	Brain	In medium	Bulk RNA Sequencing	https://www.ncbi.nlm.nih.gov/pubmed/39684792
GSE274435_DMSO_4h	CBD	Rattus norvegicus	GSE274435	4h DMSO (3) vs. CBD (3)	CBD	Brain primary hippocampal neurons	Brain	In medium	Bulk RNA Sequencing	https://www.ncbi.nlm.nih.gov/pubmed/39684792
GSE274435_EtOH_24h	CBD	Rattus norvegicus	GSE274435	24h EtOH (3) vs. CBD (3)	CBD	Brain primary hippocampal neurons	Brain	In medium	Bulk RNA Sequencing	https://www.ncbi.nlm.nih.gov/pubmed/39684792
GSE274435_EtOH_4h	CBD	Rattus norvegicus	GSE274435	4h EtOH (3) vs. CBD (3)	CBD	Brain primary hippocampal neurons	Brain	In medium	Bulk RNA Sequencing	https://www.ncbi.nlm.nih.gov/pubmed/39684792
GSE274859_LPS_24h	CBD	Mus musculus	GSE274859	24h LPS (3) vs. CBD + LPS (3)	CBD	Brain Microglial cells	Brain	In medium	Bulk RNA Sequencing	https://www.ncbi.nlm.nih.gov/pubmed/39684792
GSE274859_LPS_4h	CBD	Mus musculus	GSE274859	4h LPS (3) vs. CBD + LPS (3)	CBD	Brain Microglial cells	Brain	In medium	Bulk RNA Sequencing	https://www.ncbi.nlm.nih.gov/pubmed/39684792
GSE275998_CDB10	CBD	Mus musculus	GSE275998	Vehicle (4) vs. 10 CBD (4)	CBD	Kidney	Kidney	Intraperitoneal injection	Bulk RNA Sequencing	Not available
GSE275998_CDB20	CBD	Mus musculus	GSE275998	Vehicle (4) vs. 20 CBD (4)	CBD	Kidney	Kidney	Intraperitoneal injection	Bulk RNA Sequencing	Not available
GSE57571	CBD	Homo sapiens	GSE57571	Vehicle (3) vs. CBD (3)	CBD	Sebaceous gland (SZ95 sebocyte)	Skin	In medium	Microarray	https://www.ncbi.nlm.nih.gov/pubmed/25061872
GSE57823_Old	THC	Mus musculus	GSE57823	Old Control (5) vs. THC (5)	THC	Brain hippocampus	Brain	Subcutaneous infusion	Microarray	https://www.ncbi.nlm.nih.gov/pubmed/28481360
GSE57823_Young	THC	Mus musculus	GSE57823	Young Control (3) vs. THC (3)	THC	Brain hippocampus	Brain	Subcutaneous infusion	Microarray	https://www.ncbi.nlm.nih.gov/pubmed/28481360
GSE70689_CBD_NoLPS	CBD	Mus musculus	GSE70689	Control (6) vs. CBD (2)	CBD	BV-2 microglial cell line	Brain; Immune	In medium	Microarray	https://www.ncbi.nlm.nih.gov/pubmed/23637839
GSE70689_CBD_wLPS	CBD	Mus musculus	GSE70689	LPS (6) vs. LPS + CBD (2)	CBD	BV-2 microglial cell line	Brain; Immune	In medium	Microarray	https://www.ncbi.nlm.nih.gov/pubmed/23637839
GSE70689_THC_NoLPS	THC	Mus musculus	GSE70689	Control (6) vs. THC (4)	THC	BV-2 microglial cell line	Brain; Immune	In medium	Microarray	https://www.ncbi.nlm.nih.gov/pubmed/23637839
GSE70689_THC_wLPS	THC	Mus musculus	GSE70689	LPS (6) vs. LPS + THC (4)	THC	BV-2 microglial cell line	Brain; Immune	In medium	Microarray	https://www.ncbi.nlm.nih.gov/pubmed/23637839
