# Supplementary material for: Comparative analysis of 105 datasets across species and tissues reveals higher variability in transcriptomic responses to THC than CBD
Source: Research Square preprint supplement (doi:10.21203/rs.3.rs-6857614/v1), 2025-06-13
Supplement: Supplementary file 11 [file b3f9fd418efb8a7925e781d7.xlsx]

## Sheet: Supplement Table 9
Gene	Reference
ABCB1	DISGENET_Cannabis_Abuse; DISGENET_Cannabis_Dependence; DISGENET_Cannabis_use; DISGENET_Cannabis-Related_Disorder
ABHD12	doi.org/10.1111/j.1748-1716.2011.02280.x
ABHD6	GOBP_CANNABINOID_SIGNALING_PATHWAY; doi.org/10.1111/j.1748-1716.2011.02280.x
ACAD8	DISGENET_Cannabis_use
ACKR3	DISGENET_Cannabis_Dependence
ACSL4	doi.org/10.3389/fphar.2025.1567210
ADGRF1	GOBP_CANNABINOID_SIGNALING_PATHWAY
ADGRL4	DISGENET_Cannabis_use
ADH1C	DISGENET_Cannabis_Dependence
ADRA1A	DISGENET_Cannabis_Dependence
ADRA2A	DISGENET_Cannabis_use
ADRA2B	DISGENET_Cannabis_Dependence
AICDA	DISGENET_Cannabis_Dependence
AKT1	DISGENET_Cannabis_Abuse; DISGENET_Cannabis_Dependence; DISGENET_Cannabis_use; DISGENET_Cannabis-Related_Disorder
ALOX15B	GOBP_CANNABINOID_SIGNALING_PATHWAY
ANKFN1	DISGENET_Cannabis_Dependence
ANKHD1	DISGENET_Cannabis_use
ANKK1	DISGENET_Cannabis_Dependence; DISGENET_Cannabis_use
APOL2	DISGENET_Cannabis_Abuse; DISGENET_Cannabis_Dependence; DISGENET_Cannabis-Related_Disorder
ATP2A1	DISGENET_Cannabis_use
ATP2C2	DISGENET_Cannabis_use
BAG3	DISGENET_Cannabis_use
BAS	DISGENET_Cannabis_use
BDNF	DISGENET_Cannabis_Dependence; DISGENET_Cannabis_use
BEST1	DISGENET_Cannabis_use
BRS3	DISGENET_Cannabis_Dependence
CADM2	DISGENET_Cannabis_use
CALM1	DISGENET_Cannabis_Abuse; DISGENET_Cannabis_Dependence; DISGENET_Cannabis-Related_Disorder
CALM2	DISGENET_Cannabis_Abuse; DISGENET_Cannabis_Dependence; DISGENET_Cannabis-Related_Disorder
CAMK2A	GOBP_CANNABINOID_SIGNALING_PATHWAY
CAMK2B	DISGENET_Cannabis_Abuse; DISGENET_Cannabis_Dependence; DISGENET_Cannabis-Related_Disorder
CAST	DISGENET_Cannabis_Abuse
CHPT1	DISGENET_Cannabis_use
CHRNA2	DISGENET_Cannabis_use
CHRNA3	DISGENET_Cannabis_Abuse
CHRNA5	DISGENET_Cannabis_Abuse
CHRNA6	DISGENET_Cannabis_Dependence
CHRNA7	DISGENET_Cannabis_use
CHRNB3	DISGENET_Cannabis_Abuse
CLOCK	DISGENET_Cannabis_Dependence
CNR1	GOBP_CANNABINOID_SIGNALING_PATHWAY; DISGENET_Cannabis_Abuse; DISGENET_Cannabis_Dependence; DISGENET_Cannabis_use; DISGENET_Cannabis-Related_Disorder; doi.org/10.1371/journal.pone.0187926
CNR2	DISGENET_Cannabis_Dependence; DISGENET_Cannabis_use; doi.org/10.1371/journal.pone.0187926
COL9A1	DISGENET_Cannabis_use
COL9A2	DISGENET_Cannabis_use
COL9A3	DISGENET_Cannabis_use
COMP	DISGENET_Cannabis_use
COMT	DISGENET_Cannabis_Abuse; DISGENET_Cannabis_use
COPE	DISGENET_Cannabis_use
COX2	DISGENET_Cannabis_use
CRN1	doi.org/10.1038/sj.ijo.0803272
CRN2	doi.org/10.1038/sj.ijo.0803272
CRP	DISGENET_Cannabis_Dependence; DISGENET_Cannabis_use
CTRL	DISGENET_Cannabis_use
CXCL8	DISGENET_Cannabis_use
CXCR6	DISGENET_Cannabis_Dependence
DAGLA	doi.org/10.1371/journal.pone.0187926; doi.org/10.1111/j.1748-1716.2011.02280.x
DAGLB	doi.org/10.1111/j.1748-1716.2011.02280.x; doi.org/10.1038/s41467-022-31168-9
DHC24	doi.org/10.3389/fnmol.2019.00224
DHDDS	DISGENET_Cannabis_use
DHRS7	doi.org/10.3389/fnmol.2019.00224
DMD	DISGENET_Cannabis_use
DRD2	DISGENET_Cannabis_Dependence; DISGENET_Cannabis_use
DRD4	DISGENET_Cannabis_Abuse; DISGENET_Cannabis_use
EDNRA	DISGENET_Cannabis_Dependence
EP300	DISGENET_Cannabis_Abuse
FAAH	DISGENET_Cannabis_Dependence; DISGENET_Cannabis_use; doi.org/10.1517/17460440903018857; doi.org/10.1371/journal.pone.0187926; doi.org/10.1111/j.1748-1716.2011.02280.x; doi.org/10.1074/jbc.M109.012492‚Äã
FABP1	doi.org/10.1021/acs.biochem.6b00446‚Äã
FABP3	doi.org/10.1074/jbc.M109.012492‚Äã
FABP5	doi.org/10.1074/jbc.M109.012492‚Äã
FABP7	doi.org/10.1074/jbc.M109.012492‚Äã; doi.org/10.1016/j.neulet.2024.138040
FDFT1	DISGENET_Cannabis_Abuse; DISGENET_Cannabis_Dependence; DISGENET_Cannabis-Related_Disorder
FKBP5	DISGENET_Cannabis_Abuse; DISGENET_Cannabis_Dependence
FOXP2	DISGENET_Cannabis_use
GABRA2	DISGENET_Cannabis_Dependence; DISGENET_Cannabis_use
GAD1	DISGENET_Cannabis_use
GCC1	DISGENET_Cannabis_Abuse; DISGENET_Cannabis_Dependence; DISGENET_Cannabis-Related_Disorder
GDE1	doi.org/10.1074/jbc.M707807200
GGT7	doi.org/10.3389/fnmol.2019.00224
GPR18	doi.org/10.1186/1471-2202-11-44‚Äã
GPR42	DISGENET_Cannabis_Dependence
GPR55	GOBP_CANNABINOID_SIGNALING_PATHWAY
HCRT	DISGENET_Cannabis_Dependence
HECD3	doi.org/10.3389/fnmol.2019.00224
HTR1A	DISGENET_Cannabis_Dependence
IFT122	DISGENET_Cannabis_use
IL1B	DISGENET_Cannabis_use
IL6	DISGENET_Cannabis_use
KDM4A-AS1	DISGENET_Cannabis_use
KIAA2013	doi.org/10.3389/fnmol.2019.00224
LINC00461	DISGENET_Cannabis_use
LPAR2	DISGENET_Cannabis_Dependence
MAOA	DISGENET_Cannabis_use
MGLL	doi.org/10.1111/j.1748-1716.2011.02280.x; GOBP_CANNABINOID_SIGNALING_PATHWAY; DISGENET_Cannabis_Dependence; DISGENET_Cannabis_use; doi.org/10.1371/journal.pone.0187926
MIR583HG	DISGENET_Cannabis_use
NANS	DISGENET_Cannabis_use
NAPEPLD	doi.org/10.1073/pnas.0601832103‚Äã
NCAM1	DISGENET_Cannabis_use
NRG1	DISGENET_Cannabis_Dependence
PANK2	DISGENET_Cannabis_use
PDYN	DISGENET_Cannabis_Dependence
PENK	DISGENET_Cannabis_Dependence
PLCB1	doi.org/10.1152/jn.00111.2014
PLS1	doi.org/10.3389/fnmol.2019.00224
PLXNA3	DISGENET_Cannabis_use
PPARA	doi.org/10.1016/j.euroneuro.2012.07.007
PSS	DISGENET_Cannabis_use
PTGS2	DISGENET_Cannabis_use; doi.org/10.1007/s12035-020-02087-x
PTPN22	doi.org/10.1073/pnas.0601832103‚Äã
PTPRF	DISGENET_Cannabis_use
S100A8	DISGENET_Cannabis_use
SCARB1	DISGENET_Cannabis_Abuse; DISGENET_Cannabis_Dependence; DISGENET_Cannabis-Related_Disorder
SCN8A	DISGENET_Cannabis_use
SDK1	DISGENET_Cannabis_use
SEMA6D	DISGENET_Cannabis_use
SLC6A4	DISGENET_Cannabis_use
SLC6A9	DISGENET_Cannabis_use
SLC7A11	doi.org/10.3389/fphar.2025.1567210
SMC2	DISGENET_Cannabis_use
SMG6	DISGENET_Cannabis_use
SQSTM1	doi.org/10.3389/fnmol.2019.00224
SSTR4	DISGENET_Cannabis_Dependence
STK26	DISGENET_Cannabis_use
TGFB1	DISGENET_Cannabis_use
TLR2	DISGENET_Cannabis_use
TNRC6A	DISGENET_Cannabis_use
TRPV1	doi.org/10.1038/sj.ijo.0803272
TSPAN31	DISGENET_Cannabis_use
TSPO	DISGENET_Cannabis_use
UBE2Z	DISGENET_Cannabis_use
USE1	DISGENET_Cannabis_use
WAS	DISGENET_Cannabis_Dependence; DISGENET_Cannabis_use
WASF1	DISGENET_Cannabis_use
WASF2	DISGENET_Cannabis_Abuse; DISGENET_Cannabis_Dependence; DISGENET_Cannabis_use
ZNF704	DISGENET_Cannabis_use
ZNF804A	DISGENET_Cannabis_use
