# Supplementary material for: Comparative analysis of 105 datasets across species and tissues reveals higher variability in transcriptomic responses to THC than CBD
Source: Research Square preprint supplement (doi:10.21203/rs.3.rs-6857614/v1), 2025-06-13
Supplement: Supplementary file 12 [file b48f7af648b8dcef6795560e.xlsx]

## Sheet: THC_gene_consistency
X	Freq	down	down.Source	up	up.Source
APOD	3	2	DEG_GSE181487; DEG_GSE189821_Female_Amy	1	DEG_GSE213734_vehicle
BPGM	3	0	NA	3	DEG_GSE242892_WT; DEG_GSE273695_Blood_Female_LPS; DEG_GSE273695_Blood_Male_Saline
CNR1	3	1	DEG_GSE189821_Female_DMS	2	DEG_GSE189821_Female_Amy; DEG_GSE273695_Brain_Male_LPS
COL1A2	3	0	NA	3	DEG_GSE116813_vehicle; DEG_GSE235969_Female_Old_5d; DEG_GSE273695_Brain_Female_LPS
EGR2	3	2	DEG_GSE235969_Female_Old_5d; DEG_GSE273695_Brain_Male_LPS	1	DEG_GSE213734_vehicle
FRY	3	0	NA	3	DEG_GSE189821_Female_Amy; DEG_GSE189821_Male_Nac; DEG_GSE273695_Brain_Male_LPS
GPD1	3	1	DEG_GSE242892_16p11dup	2	DEG_GSE189821_Female_Amy; DEG_GSE273695_Brain_Male_Saline
KCNQ5	3	0	NA	3	DEG_GSE189821_Female_Amy; DEG_GSE189821_Male_Nac; DEG_GSE273695_Brain_Male_LPS
NR4A1	3	1	DEG_GSE273695_Brain_Male_LPS	2	DEG_GSE189821_Female_Amy; DEG_GSE213734_vehicle
OSBPL3	3	1	DEG_GSE189821_Female_PFC	2	DEG_GSE189821_Female_Amy; DEG_GSE242892_16p11dup
PER1	3	0	NA	3	DEG_GSE189821_Female_Amy; DEG_GSE189821_Male_Nac; DEG_GSE213734_vehicle
PRXL2A	3	3	DEG_GSE189821_Female_Amy; DEG_GSE189821_Male_Nac; DEG_GSE273695_Brain_Male_LPS	0	NA
RALGAPA2	3	0	NA	3	DEG_GSE189821_Female_Amy; DEG_GSE273695_Blood_Male_Saline; DEG_GSE273695_Brain_Male_LPS
RPH3A	3	2	DEG_GSE189821_Female_DMS; DEG_GSE189821_Male_Nac	1	DEG_GSE273695_Brain_Male_LPS
TRIB1	3	1	DEG_GSE273695_Brain_Male_LPS	2	DEG_GSE189821_Female_Amy; DEG_GSE213734_vehicle
XRCC2	3	0	NA	3	DEG_GSE273695_Brain_Female_LPS; DEG_GSE273695_Brain_Female_Saline; DEG_GSE273695_Brain_Male_Saline
ADCY1	2	0	NA	2	DEG_GSE189821_Female_Amy; DEG_GSE273695_Brain_Male_LPS
ADGRB2	2	0	NA	2	DEG_GSE189821_Female_Amy; DEG_GSE189821_Male_Nac
ADGRL1	2	0	NA	2	DEG_GSE189821_Female_Amy; DEG_GSE273695_Brain_Male_LPS
AFF3	2	0	NA	2	DEG_GSE189821_Female_Amy; DEG_GSE273695_Brain_Male_LPS
AKT3	2	0	NA	2	DEG_GSE189821_Female_Amy; DEG_GSE273695_Brain_Male_LPS
ALDH1A2	2	0	NA	2	DEG_GSE116813_vehicle; DEG_GSE273695_Brain_Female_LPS
ANKRD33B	2	0	NA	2	DEG_GSE189821_Female_Amy; DEG_GSE273695_Brain_Male_LPS
ANO3	2	0	NA	2	DEG_GSE189821_Female_Amy; DEG_GSE273695_Brain_Male_LPS
ANXA11	2	0	NA	2	DEG_GSE116813_vehicle; DEG_GSE189821_Female_Amy
ANXA6	2	0	NA	2	DEG_GSE189821_Female_Amy; DEG_GSE273695_Brain_Male_Saline
APOE	2	2	DEG_GSE189821_Female_Amy; DEG_GSE273695_Brain_Male_LPS	0	NA
AQP1	2	1	DEG_GSE235969_Male_Young_5wk	1	DEG_GSE273695_Blood_Female_LPS
ARHGAP32	2	0	NA	2	DEG_GSE189821_Female_Amy; DEG_GSE273695_Brain_Male_LPS
ARHGEF2	2	1	DEG_GSE181487	1	DEG_GSE189821_Female_Amy
ARID5B	2	0	NA	2	DEG_GSE242892_WT; DEG_GSE273695_Brain_Male_LPS
ARL4D	2	1	DEG_GSE273695_Brain_Male_LPS	1	DEG_GSE116813_vehicle
ARPP21	2	1	DEG_GSE116813_vehicle	1	DEG_GSE189821_Female_Amy
ATF6	2	0	NA	2	DEG_GSE189821_Female_Amy; DEG_GSE273695_Brain_Male_LPS
ATP8A1	2	1	DEG_GSE273695_Blood_Male_Saline	1	DEG_GSE244644_FetalAorta
B3GALT1	2	1	DEG_GSE116813_vehicle	1	DEG_GSE273695_Brain_Male_LPS
BACE1	2	0	NA	2	DEG_GSE189821_Female_Amy; DEG_GSE273695_Brain_Male_LPS
BASP1	2	2	DEG_GSE189821_Male_Nac; DEG_GSE273695_Brain_Male_LPS	0	NA
BCL11B	2	0	NA	2	DEG_GSE189821_Female_Amy; DEG_GSE189821_Male_Nac
BLOC1S2	2	1	DEG_GSE273695_Brain_Male_LPS	1	DEG_GSE158188_Male
BMP3	2	0	NA	2	DEG_GSE189821_Female_Amy; DEG_GSE273695_Brain_Male_LPS
BRSK1	2	1	DEG_GSE189821_Female_DMS	1	DEG_GSE189821_Female_Amy
BSN	2	0	NA	2	DEG_GSE189821_Female_Amy; DEG_GSE273695_Brain_Male_LPS
C11orf87	2	0	NA	2	DEG_GSE189821_Female_Amy; DEG_GSE189821_Male_Nac
CACNA1B	2	1	DEG_GSE181487	1	DEG_GSE273695_Brain_Male_LPS
CACNB4	2	1	DEG_GSE116813_vehicle	1	DEG_GSE213734_LPS
CALN1	2	0	NA	2	DEG_GSE189821_Female_Amy; DEG_GSE273695_Brain_Male_LPS
CAMK1D	2	0	NA	2	DEG_GSE189821_Female_Amy; DEG_GSE273695_Brain_Male_LPS
CAMK2A	2	0	NA	2	DEG_GSE189821_Female_Amy; DEG_GSE242892_WT
CARMIL2	2	2	DEG_GSE181487; DEG_GSE273695_Brain_Male_LPS	0	NA
CCDC142	2	1	DEG_GSE273695_Brain_Male_LPS	1	DEG_GSE242892_WT
CCDC50	2	1	DEG_GSE189821_Female_DMS	1	DEG_GSE273695_Brain_Male_LPS
CCSAP	2	1	DEG_GSE273695_Brain_Male_Saline	1	DEG_GSE189821_Female_Amy
CD93	2	1	DEG_GSE273695_Blood_Male_Saline	1	DEG_GSE273695_Brain_Female_LPS
CDC25B	2	0	NA	2	DEG_GSE273695_Blood_Female_LPS; DEG_GSE273695_Blood_Male_Saline
CDC26	2	2	DEG_GSE181487; DEG_GSE189821_Female_Amy	0	NA
CDK5R2	2	1	DEG_GSE189821_Female_DMS	1	DEG_GSE189821_Female_Amy
CEBPB	2	0	NA	2	DEG_GSE116813_vehicle; DEG_GSE244644_FetalAorta
CELF1	2	0	NA	2	DEG_GSE189821_Female_Amy; DEG_GSE189821_Male_Nac
CFAP43	2	1	DEG_GSE235969_Male_Young_5wk	1	DEG_GSE242892_WT
CHN1	2	1	DEG_GSE158188_Female	1	DEG_GSE189821_Female_Amy
CHRM4	2	0	NA	2	DEG_GSE189821_Female_Amy; DEG_GSE189821_Male_Nac
CHST15	2	0	NA	2	DEG_GSE116813_vehicle; DEG_GSE189821_Female_Amy
CMTM5	2	2	DEG_GSE189821_Female_Amy; DEG_GSE273695_Brain_Male_LPS	0	NA
CNIH2	2	2	DEG_GSE273695_Blood_Male_Saline; DEG_GSE273695_Brain_Male_LPS	0	NA
CNMD	2	2	DEG_GSE116813_DISC1; DEG_GSE189821_Female_Amy	0	NA
CNTN4	2	0	NA	2	DEG_GSE189821_Female_Amy; DEG_GSE273695_Brain_Male_LPS
CNTNAP2	2	1	DEG_GSE116813_vehicle	1	DEG_GSE273695_Brain_Male_LPS
COL3A1	2	1	DEG_GSE189821_Female_Amy	1	DEG_GSE273695_Brain_Female_LPS
COPE	2	2	DEG_GSE242892_WT; DEG_GSE273695_Brain_Male_LPS	0	NA
CORO1C	2	0	NA	2	DEG_GSE242892_16p11dup; DEG_GSE242892_WT
CPNE9	2	1	DEG_GSE189821_Female_DMS	1	DEG_GSE189821_Female_Amy
CREG1	2	1	DEG_GSE189821_Female_Amy	1	DEG_GSE273695_Blood_Female_LPS
CREM	2	1	DEG_GSE273695_Brain_Male_LPS	1	DEG_GSE242892_16p11dup
CSF1R	2	2	DEG_GSE116813_vehicle; DEG_GSE189821_Female_VTA	0	NA
CSMD1	2	0	NA	2	DEG_GSE189821_Female_Amy; DEG_GSE273695_Brain_Male_LPS
CUX2	2	1	DEG_GSE116813_vehicle	1	DEG_GSE242892_WT
CXCL12	2	0	NA	2	DEG_GSE116813_vehicle; DEG_GSE273695_Brain_Male_Saline
CYFIP2	2	0	NA	2	DEG_GSE189821_Female_Amy; DEG_GSE273695_Brain_Male_LPS
CYP1B1	2	0	NA	2	DEG_GSE116813_vehicle; DEG_GSE273695_Brain_Female_LPS
DDIT3	2	1	DEG_GSE273695_Brain_Male_LPS	1	GSE70689_THC_NoLPS
DDIT4	2	1	DEG_GSE240225_THC	1	DEG_GSE116813_vehicle
DDN	2	1	DEG_GSE213734_vehicle	1	DEG_GSE189821_Female_Amy
DEPTOR	2	0	NA	2	DEG_GSE189821_Female_Amy; DEG_GSE273695_Brain_Male_LPS
DGKH	2	0	NA	2	DEG_GSE189821_Female_Amy; DEG_GSE273695_Brain_Male_LPS
DNAJB5	2	1	DEG_GSE273695_Brain_Male_LPS	1	DEG_GSE189821_Male_Nac
DOCK3	2	0	NA	2	DEG_GSE242892_16p11dup; DEG_GSE273695_Brain_Male_LPS
DOCK4	2	0	NA	2	DEG_GSE189821_Female_Amy; DEG_GSE273695_Brain_Male_LPS
DUSP6	2	1	DEG_GSE273695_Brain_Male_LPS	1	DEG_GSE244644_FetalAorta
DYNLL1	2	1	DEG_GSE273695_Brain_Male_LPS	1	DEG_GSE189821_Male_Nac
DZANK1	2	0	NA	2	DEG_GSE242892_WT; DEG_GSE273695_Brain_Male_LPS
EDIL3	2	1	DEG_GSE189821_Male_Nac	1	DEG_GSE273695_Brain_Male_LPS
EGFR	2	0	NA	2	DEG_GSE213734_vehicle; DEG_GSE273695_Brain_Male_LPS
EGR4	2	1	DEG_GSE273695_Brain_Male_LPS	1	DEG_GSE213734_vehicle
EHD1	2	0	NA	2	DEG_GSE116813_vehicle; DEG_GSE189821_Female_Amy
ELN	2	1	DEG_GSE244644_FetalAorta	1	DEG_GSE235969_Female_Old_5d
EPHA4	2	0	NA	2	DEG_GSE189821_Female_Amy; DEG_GSE273695_Brain_Male_LPS
EPHA8	2	0	NA	2	DEG_GSE189821_Male_Nac; DEG_GSE273695_Brain_Male_LPS
ERF	2	1	DEG_GSE273695_Brain_Male_Saline	1	DEG_GSE189821_Female_Amy
ERGIC1	2	1	DEG_GSE189821_Female_DMS	1	DEG_GSE242892_WT
FAT3	2	1	DEG_GSE116813_vehicle	1	DEG_GSE273695_Brain_Male_LPS
FHL2	2	1	DEG_GSE273695_Brain_Male_LPS	1	DEG_GSE189821_Female_Amy
FKBP5	2	0	NA	2	DEG_GSE116813_vehicle; DEG_GSE273695_Brain_Male_Saline
FLRT2	2	0	NA	2	DEG_GSE189821_Female_Amy; DEG_GSE273695_Brain_Male_LPS
FMN1	2	0	NA	2	DEG_GSE189821_Female_Amy; DEG_GSE273695_Brain_Male_LPS
FOSB	2	1	DEG_GSE273695_Brain_Male_LPS	1	DEG_GSE213734_vehicle
GADD45B	2	2	DEG_GSE181487; DEG_GSE273695_Brain_Male_LPS	0	NA
GPLD1	2	2	DEG_GSE116813_vehicle; DEG_GSE189821_Female_Amy	0	NA
GPR88	2	0	NA	2	DEG_GSE189821_Female_Amy; DEG_GSE189821_Male_Nac
GRID2	2	1	DEG_GSE116813_vehicle	1	DEG_GSE273695_Brain_Male_LPS
GRIN2A	2	0	NA	2	DEG_GSE189821_Female_Amy; DEG_GSE273695_Brain_Male_LPS
GRM2	2	1	DEG_GSE273695_Brain_Female_LPS	1	DEG_GSE189821_Female_Amy
GUCY1A1	2	1	DEG_GSE158188_Female	1	DEG_GSE189821_Female_Amy
HEMGN	2	0	NA	2	DEG_GSE273695_Blood_Female_LPS; DEG_GSE273695_Blood_Male_Saline
HIVEP2	2	0	NA	2	DEG_GSE189821_Female_Amy; DEG_GSE273695_Brain_Male_LPS
HKDC1	2	1	DEG_GSE116813_vehicle	1	DEG_GSE189821_Female_Amy
HLF	2	1	DEG_GSE189821_Female_DMS	1	DEG_GSE189821_Female_Amy
HPCAL4	2	1	DEG_GSE213734_vehicle	1	DEG_GSE189821_Female_Amy
HRH1	2	2	DEG_GSE116813_vehicle; DEG_GSE189821_Female_Amy	0	NA
HS6ST3	2	1	DEG_GSE189821_Female_DMS	1	DEG_GSE235969_Female_Old_5d
IDNK	2	2	DEG_GSE189821_Female_Amy; DEG_GSE273695_Brain_Male_LPS	0	NA
IFIT3	2	2	DEG_GSE189821_Female_Amy	0	NA
IGFBP4	2	1	DEG_GSE273695_Brain_Male_LPS	1	DEG_GSE189821_Female_Amy
IGSF1	2	2	DEG_GSE116813_DISC1; DEG_GSE189821_Female_Amy	0	NA
IGSF9B	2	0	NA	2	DEG_GSE213734_vehicle; DEG_GSE273695_Brain_Male_LPS
IQGAP2	2	0	NA	2	DEG_GSE189821_Female_Amy; DEG_GSE273695_Brain_Male_Saline
IQSEC2	2	0	NA	2	DEG_GSE189821_Female_Amy; DEG_GSE273695_Brain_Male_LPS
ISLR	2	0	NA	2	DEG_GSE116813_vehicle; DEG_GSE273695_Brain_Female_LPS
ISLR2	2	1	DEG_GSE244644_FetalAorta	1	DEG_GSE189821_Female_Amy
ITGBL1	2	0	NA	2	DEG_GSE189821_Female_Amy; DEG_GSE273695_Brain_Female_LPS
ITIH2	2	0	NA	2	DEG_GSE116813_vehicle; DEG_GSE235969_Female_Old_5d
ITPR1	2	0	NA	2	DEG_GSE189821_Female_Amy; DEG_GSE273695_Brain_Male_LPS
JAM3	2	1	DEG_GSE189821_Female_Amy	1	DEG_GSE242892_16p11dup
JPH1	2	0	NA	2	DEG_GSE116813_vehicle; DEG_GSE189821_Female_Amy
JPH4	2	0	NA	2	DEG_GSE189821_Female_Amy; DEG_GSE189821_Male_Nac
KALRN	2	0	NA	2	DEG_GSE189821_Female_Amy; DEG_GSE273695_Brain_Male_LPS
KCNAB2	2	0	NA	2	DEG_GSE189821_Female_Amy; DEG_GSE273695_Brain_Male_LPS
KCNB1	2	1	DEG_GSE242892_16p11dup	1	DEG_GSE273695_Brain_Male_LPS
KCNF1	2	0	NA	2	DEG_GSE189821_Female_Amy; DEG_GSE273695_Brain_Male_LPS
KCTD16	2	0	NA	2	DEG_GSE189821_Female_Amy; DEG_GSE273695_Brain_Male_LPS
KEL	2	0	NA	2	DEG_GSE273695_Blood_Female_LPS; DEG_GSE273695_Blood_Male_Saline
KIAA1217	2	0	NA	2	DEG_GSE189821_Female_Amy; DEG_GSE273695_Brain_Male_LPS
KIAA1671	2	1	DEG_GSE189821_Female_DMS	1	DEG_GSE189821_Female_Amy
KIF20B	2	1	DEG_GSE244644_UmbilicalVein	1	DEG_GSE242892_16p11dup
KIF5A	2	2	DEG_GSE189821_Male_Nac; DEG_GSE213734_vehicle	0	NA
KLF2	2	0	NA	2	DEG_GSE116813_vehicle; DEG_GSE213734_vehicle
KPNA6	2	1	DEG_GSE189821_Male_Nac	1	DEG_GSE273695_Brain_Male_LPS
LIFR	2	1	DEG_GSE244644_UmbilicalVein	1	DEG_GSE273695_Brain_Male_LPS
LRRC10B	2	1	DEG_GSE213734_vehicle	1	DEG_GSE189821_Female_Amy
LRRC7	2	0	NA	2	DEG_GSE189821_Female_Amy; DEG_GSE273695_Brain_Male_LPS
LYNX1	2	1	DEG_GSE189821_Female_DMS	1	DEG_GSE189821_Female_Amy
MAN2A2	2	1	DEG_GSE189821_Female_DMS	1	DEG_GSE273695_Brain_Male_LPS
MAP3K10	2	0	NA	2	DEG_GSE189821_Female_Amy; DEG_GSE242892_16p11dup
MARK2	2	1	DEG_GSE189821_Female_DMS	1	DEG_GSE189821_Female_Amy
MEF2C	2	0	NA	2	DEG_GSE189821_Female_Amy; DEG_GSE273695_Brain_Male_LPS
MICAL2	2	0	NA	2	DEG_GSE189821_Female_Amy; DEG_GSE273695_Blood_Male_Saline
MMP17	2	0	NA	2	DEG_GSE189821_Female_Amy; DEG_GSE244644_FetalAorta
MRPL12	2	2	DEG_GSE116813_vehicle; DEG_GSE273695_Brain_Male_LPS	0	NA
MTCL1	2	1	DEG_GSE189821_Female_DMS	1	DEG_GSE189821_Female_Amy
MYO5B	2	0	NA	2	DEG_GSE116813_vehicle; DEG_GSE189821_Female_Amy
MYO5C	2	0	NA	2	DEG_GSE189821_Female_Amy; DEG_GSE273695_Blood_Female_LPS
NACA	2	2	DEG_GSE189821_Female_Amy; DEG_GSE273695_Brain_Male_LPS	0	NA
NAV3	2	0	NA	2	DEG_GSE189821_Female_Amy; DEG_GSE273695_Brain_Male_LPS
NBEA	2	0	NA	2	DEG_GSE189821_Female_Amy; DEG_GSE273695_Brain_Male_LPS
NCAN	2	0	NA	2	DEG_GSE189821_Female_Amy; DEG_GSE273695_Brain_Male_LPS
NDUFB3	2	2	DEG_GSE181487; DEG_GSE273695_Brain_Male_LPS	0	NA
NECAB1	2	0	NA	2	DEG_GSE189821_Female_Amy; DEG_GSE273695_Brain_Male_LPS
NOL6	2	0	NA	2	DEG_GSE189821_Female_Amy; DEG_GSE189821_Male_Nac
NR1D1	2	1	DEG_GSE273695_Brain_Male_Saline	1	DEG_GSE189821_Female_Amy
NR4A3	2	1	DEG_GSE273695_Brain_Male_LPS	1	DEG_GSE189821_Female_Amy
NRCAM	2	0	NA	2	DEG_GSE189821_Female_Amy; DEG_GSE273695_Brain_Male_LPS
NREP	2	1	DEG_GSE116813_vehicle	1	DEG_GSE189821_Female_Amy
OTOP2	2	0	NA	2	DEG_GSE189821_Female_Amy; DEG_GSE213734_LPS
OTUD1	2	1	DEG_GSE273695_Brain_Male_LPS	1	DEG_GSE189821_Female_Amy
PALM2-AKAP2	2	1	DEG_GSE189821_Male_Nac	1	DEG_GSE273695_Brain_Male_LPS
PCDH10	2	1	DEG_GSE116813_vehicle	1	DEG_GSE273695_Brain_Male_LPS
PCDHGC5	2	0	NA	2	DEG_GSE189821_Female_Amy; DEG_GSE189821_Male_Nac
PDE10A	2	0	NA	2	DEG_GSE189821_Female_Amy; DEG_GSE273695_Brain_Male_Saline
PDE4B	2	0	NA	2	DEG_GSE242892_16p11dup; DEG_GSE273695_Brain_Male_LPS
PDE4DIP	2	0	NA	2	DEG_GSE189821_Male_Nac; DEG_GSE273695_Brain_Male_LPS
PEX5L	2	1	DEG_GSE189821_Male_Nac	1	DEG_GSE273695_Brain_Male_LPS
PFDN2	2	2	DEG_GSE189821_Female_Amy; DEG_GSE273695_Brain_Male_LPS	0	NA
PFKFB3	2	2	DEG_GSE189821_Female_DMS; DEG_GSE242892_16p11dup	0	NA
PHOSPHO1	2	0	NA	2	DEG_GSE189821_Female_Amy; DEG_GSE273695_Blood_Female_LPS
PIEZO1	2	0	NA	2	DEG_GSE116813_vehicle; DEG_GSE189821_Female_Amy
PITPNM2	2	0	NA	2	DEG_GSE189821_Female_Amy; DEG_GSE189821_Male_Nac
PLCB1	2	0	NA	2	DEG_GSE189821_Female_Amy; DEG_GSE273695_Brain_Male_LPS
PLK3	2	2	DEG_GSE189821_Female_DMS; DEG_GSE273695_Brain_Male_LPS	0	NA
PPP1R2	2	0	NA	2	DEG_GSE189821_Female_Amy; DEG_GSE189821_Female_DMS
PPP2R5E	2	1	DEG_GSE242892_WT	1	DEG_GSE273695_Brain_Male_LPS
PRELP	2	0	NA	2	DEG_GSE116813_vehicle; DEG_GSE213734_vehicle
PTPRJ	2	1	DEG_GSE213734_vehicle	1	DEG_GSE189821_Female_Amy
RAB3IP	2	0	NA	2	DEG_GSE189821_Female_Amy; DEG_GSE242892_16p11dup
RASGEF1B	2	1	DEG_GSE116813_vehicle	1	DEG_GSE189821_Female_Amy
RASGRP1	2	0	NA	2	DEG_GSE189821_Female_Amy; DEG_GSE273695_Brain_Male_LPS
RELN	2	1	DEG_GSE116813_vehicle	1	DEG_GSE273695_Brain_Male_LPS
RIMS1	2	0	NA	2	DEG_GSE189821_Female_Amy; DEG_GSE273695_Brain_Male_LPS
RIMS3	2	1	DEG_GSE116813_vehicle	1	DEG_GSE273695_Brain_Male_LPS
ROBO2	2	0	NA	2	DEG_GSE189821_Female_Amy; DEG_GSE273695_Brain_Male_LPS
RPL11	2	2	DEG_GSE189821_Female_Amy; DEG_GSE273695_Brain_Male_LPS	0	NA
RPL23A	2	2	DEG_GSE189821_Female_Amy; DEG_GSE273695_Brain_Male_LPS	0	NA
RPL34	2	2	DEG_GSE189821_Female_Amy; DEG_GSE273695_Brain_Male_LPS	0	NA
RPS12	2	2	DEG_GSE189821_Female_Amy; DEG_GSE273695_Brain_Male_LPS	0	NA
RPS6KA3	2	0	NA	2	DEG_GSE189821_Male_Nac; DEG_GSE242892_WT
RSPO2	2	0	NA	2	DEG_GSE189821_Female_Amy; DEG_GSE273695_Brain_Male_Saline
RTL5	2	0	NA	2	DEG_GSE242892_16p11dup; DEG_GSE242892_WT
RYR1	2	1	DEG_GSE189821_Female_DMS	1	DEG_GSE189821_Male_Nac
S100A13	2	2	DEG_GSE181487; DEG_GSE189821_Female_Amy	0	NA
SAMD8	2	0	NA	2	DEG_GSE235969_Female_Old_5d; DEG_GSE273695_Brain_Male_LPS
SATB1	2	1	DEG_GSE116813_vehicle	1	DEG_GSE189821_Female_Amy
SCAI	2	1	DEG_GSE242892_16p11dup	1	DEG_GSE273695_Brain_Male_LPS
SCN8A	2	0	NA	2	DEG_GSE242892_16p11dup; DEG_GSE273695_Brain_Male_LPS
SDK2	2	1	DEG_GSE116813_vehicle	1	DEG_GSE273695_Brain_Male_LPS
SEMA7A	2	1	DEG_GSE189821_Female_DMS	1	DEG_GSE189821_Female_Amy
SETBP1	2	1	DEG_GSE244644_UmbilicalVein	1	DEG_GSE273695_Brain_Male_LPS
SGK1	2	0	NA	2	DEG_GSE116813_vehicle; DEG_GSE213734_vehicle
SHANK3	2	0	NA	2	DEG_GSE189821_Female_Amy; DEG_GSE189821_Male_Nac
SLC30A3	2	1	DEG_GSE273695_Brain_Male_LPS	1	DEG_GSE189821_Female_Amy
SLC6A20	2	0	NA	2	DEG_GSE116813_vehicle; DEG_GSE235969_Female_Old_5d
SLIT3	2	0	NA	2	DEG_GSE189821_Female_Amy; DEG_GSE273695_Brain_Male_LPS
SMAD4	2	1	DEG_GSE189821_Female_DMS	1	DEG_GSE273695_Brain_Male_LPS
SMARCD1	2	0	NA	2	DEG_GSE189821_Female_Amy; DEG_GSE189821_Male_Nac
SNAP91	2	0	NA	2	DEG_GSE189821_Female_Amy; DEG_GSE273695_Brain_Male_LPS
SNCG	2	1	DEG_GSE181487	1	DEG_GSE273695_Brain_Female_LPS
SPEG	2	1	DEG_GSE273695_Brain_Male_LPS	1	DEG_GSE189821_Female_Amy
SPTB	2	0	NA	2	DEG_GSE189821_Male_Nac; DEG_GSE273695_Brain_Male_LPS
STMN2	2	1	DEG_GSE116813_vehicle	1	DEG_GSE242892_16p11dup
STRA6	2	1	DEG_GSE235969_Female_Old_5wk	1	DEG_GSE116813_vehicle
SV2B	2	0	NA	2	DEG_GSE189821_Female_Amy; DEG_GSE273695_Brain_Male_LPS
SYN2	2	0	NA	2	DEG_GSE189821_Female_Amy; DEG_GSE273695_Brain_Male_LPS
TBC1D24	2	0	NA	2	DEG_GSE189821_Female_Amy; DEG_GSE273695_Brain_Male_LPS
TBC1D30	2	1	DEG_GSE189821_Female_DMS	1	DEG_GSE273695_Brain_Male_LPS
TBCA	2	2	DEG_GSE189821_Female_Amy; DEG_GSE273695_Brain_Male_LPS	0	NA
TESC	2	1	DEG_GSE273695_Brain_Male_LPS	1	DEG_GSE189821_Female_Amy
TGFB2	2	1	DEG_GSE213734_vehicle	1	DEG_GSE189821_Female_Amy
TIPARP	2	1	DEG_GSE273695_Brain_Male_LPS	1	DEG_GSE213734_vehicle
TLN2	2	0	NA	2	DEG_GSE189821_Male_Nac; DEG_GSE273695_Brain_Male_LPS
TMEM121B	2	0	NA	2	DEG_GSE189821_Female_Amy; DEG_GSE189821_Male_Nac
TMEM255A	2	1	DEG_GSE189821_Female_Amy	1	DEG_GSE273695_Brain_Male_LPS
TMTC1	2	0	NA	2	DEG_GSE189821_Female_Amy; DEG_GSE273695_Brain_Male_LPS
TNS1	2	0	NA	2	DEG_GSE235969_Female_Old_5d; DEG_GSE273695_Brain_Male_LPS
TOGARAM1	2	0	NA	2	DEG_GSE189821_Female_Amy; DEG_GSE273695_Brain_Male_LPS
TOMM7	2	2	DEG_GSE189821_Female_Amy; DEG_GSE273695_Brain_Male_LPS	0	NA
TRIM66	2	1	DEG_GSE116813_vehicle	1	DEG_GSE273695_Brain_Male_LPS
TRIM9	2	1	DEG_GSE189821_Female_DMS	1	DEG_GSE189821_Female_Amy
TRMT61A	2	0	NA	2	DEG_GSE189821_Female_Amy; DEG_GSE242892_16p11dup
TRPV4	2	1	DEG_GSE242892_16p11dup	1	DEG_GSE242892_WT
TRRAP	2	0	NA	2	DEG_GSE189821_Male_Nac; DEG_GSE273695_Brain_Male_LPS
TTC39B	2	0	NA	2	DEG_GSE189821_Female_Amy; DEG_GSE273695_Brain_Male_LPS
TUBB6	2	2	DEG_GSE189821_Female_Amy; DEG_GSE273695_Blood_Male_Saline	0	NA
TWSG1	2	0	NA	2	DEG_GSE116813_vehicle; DEG_GSE242892_16p11dup
UBE3B	2	0	NA	2	DEG_GSE189821_Female_Amy; DEG_GSE189821_Male_Nac
VIM	2	0	NA	2	DEG_GSE235969_Female_Old_5d; DEG_GSE273695_Brain_Female_LPS
VRK3	2	1	DEG_GSE242892_WT	1	DEG_GSE242892_16p11dup
VWA1	2	1	DEG_GSE189821_Female_Amy	1	DEG_GSE273695_Brain_Male_Saline
VWA5B2	2	2	DEG_GSE116813_vehicle; DEG_GSE189821_Female_Amy	0	NA
VWF	2	0	NA	2	DEG_GSE116813_vehicle; DEG_GSE273695_Brain_Female_LPS
ZMYND19	2	2	DEG_GSE242892_16p11dup; DEG_GSE242892_WT	0	NA
ZNF365	2	1	DEG_GSE244644_FetalAorta	1	DEG_GSE189821_Female_Amy
ZNF483	2	0	NA	2	DEG_GSE181487; DEG_GSE273695_Brain_Male_LPS
AAK1	1	0	NA	1	DEG_GSE273695_Brain_Male_LPS
ABAT	1	0	NA	1	DEG_GSE273695_Brain_Male_LPS
ABCA1	1	0	NA	1	DEG_GSE273695_Brain_Male_LPS
ABCA2	1	0	NA	1	DEG_GSE273695_Brain_Male_LPS
ABCB7	1	0	NA	1	DEG_GSE273695_Brain_Male_LPS
ABCC1	1	0	NA	1	DEG_GSE273695_Brain_Male_LPS
ABHD2	1	0	NA	1	DEG_GSE189821_Female_Amy
ABHD4	1	0	NA	1	DEG_GSE242892_WT
ABHD8	1	0	NA	1	DEG_GSE242892_16p11dup
ABI3BP	1	0	NA	1	DEG_GSE244644_FetalAorta
ABL2	1	0	NA	1	DEG_GSE273695_Brain_Male_LPS
ABLIM3	1	1	DEG_GSE189821_Female_Amy	0	NA
ACACA	1	0	NA	1	DEG_GSE273695_Brain_Male_LPS
ACADSB	1	0	NA	1	DEG_GSE244644_FetalAorta
ACAP3	1	0	NA	1	DEG_GSE189821_Female_Amy
ACBD6	1	1	DEG_GSE244644_FetalAorta	0	NA
ACE	1	1	DEG_GSE189821_Female_DMS	0	NA
ACOX3	1	0	NA	1	DEG_GSE189821_Female_Amy
ACSS3	1	0	NA	1	DEG_GSE116813_vehicle
ACTN1	1	0	NA	1	DEG_GSE189821_Female_Amy
ACTN2	1	0	NA	1	DEG_GSE189821_Female_Amy
ACTN4	1	0	NA	1	DEG_GSE189821_Female_Amy
ACVR1	1	0	NA	1	DEG_GSE189821_Female_Amy
ACVR1C	1	0	NA	1	DEG_GSE189821_Female_Amy
ADAM12	1	0	NA	1	DEG_GSE116813_vehicle
ADAM19	1	0	NA	1	DEG_GSE273695_Brain_Male_LPS
ADAM22	1	0	NA	1	DEG_GSE273695_Brain_Male_LPS
ADAM33	1	1	DEG_GSE189821_Female_Amy	0	NA
ADAM8	1	0	NA	1	DEG_GSE242892_WT
ADAMTS1	1	0	NA	1	DEG_GSE273695_Brain_Female_LPS
ADAMTS10	1	1	DEG_GSE189821_Female_Amy	0	NA
ADAMTSL1	1	0	NA	1	DEG_GSE189821_Female_Amy
ADAMTSL2	1	1	DEG_GSE189821_Female_Amy	0	NA
ADCY5	1	0	NA	1	DEG_GSE189821_Female_Amy
ADCY8	1	1	DEG_GSE189821_Female_Amy	0	NA
ADCY9	1	0	NA	1	DEG_GSE273695_Brain_Male_LPS
ADD1	1	0	NA	1	DEG_GSE189821_Female_Amy
ADD2	1	0	NA	1	DEG_GSE273695_Blood_Female_LPS
ADGRA1	1	0	NA	1	DEG_GSE273695_Brain_Male_LPS
ADGRF5	1	0	NA	1	DEG_GSE273695_Brain_Male_LPS
ADORA1	1	0	NA	1	DEG_GSE189821_Female_Amy
ADORA2A	1	0	NA	1	DEG_GSE189821_Female_Amy
ADRA2B	1	0	NA	1	DEG_GSE189821_Female_Amy
AEBP1	1	0	NA	1	DEG_GSE116813_vehicle
AFF1	1	0	NA	1	DEG_GSE273695_Brain_Male_LPS
AFF4	1	0	NA	1	DEG_GSE273695_Brain_Male_LPS
AGAP1	1	0	NA	1	DEG_GSE273695_Brain_Male_LPS
AGAP2	1	0	NA	1	DEG_GSE189821_Female_Amy
AGO2	1	0	NA	1	DEG_GSE273695_Brain_Male_LPS
AGO3	1	0	NA	1	DEG_GSE273695_Brain_Male_LPS
AGPS	1	0	NA	1	DEG_GSE273695_Brain_Male_LPS
AGT	1	1	DEG_GSE189821_Female_Amy	0	NA
AHCTF1	1	0	NA	1	DEG_GSE213734_vehicle
AHI1	1	1	DEG_GSE189821_Female_Amy	0	NA
AHNAK	1	0	NA	1	DEG_GSE116813_vehicle
AHSP	1	0	NA	1	DEG_GSE273695_Blood_Female_LPS
AIF1	1	1	DEG_GSE181487	0	NA
AIMP2	1	0	NA	1	DEG_GSE242892_16p11dup
AK5	1	0	NA	1	DEG_GSE189821_Female_Amy
AKAP10	1	0	NA	1	DEG_GSE273695_Brain_Male_LPS
AKAP11	1	0	NA	1	DEG_GSE273695_Brain_Male_LPS
AKAP9	1	0	NA	1	DEG_GSE273695_Brain_Male_LPS
AKT2	1	0	NA	1	DEG_GSE189821_Female_Amy
ALDH3A2	1	1	DEG_GSE242892_WT	0	NA
ALDH3B2	1	1	DEG_GSE189821_Female_Amy	0	NA
ALDOB	1	0	NA	1	DEG_GSE244644_FetalAorta
ALDOC	1	0	NA	1	DEG_GSE244644_FetalAorta
ALG10	1	0	NA	1	DEG_GSE273695_Brain_Male_LPS
ALKAL2	1	0	NA	1	DEG_GSE189821_Female_Amy
ALKBH7	1	1	DEG_GSE189821_Female_Amy	0	NA
ALOX15	1	0	NA	1	DEG_GSE273695_Blood_Female_LPS
ALS2	1	0	NA	1	DEG_GSE273695_Brain_Male_LPS
ALX4	1	0	NA	1	DEG_GSE116813_vehicle
AMOTL1	1	0	NA	1	DEG_GSE273695_Brain_Male_LPS
AMPH	1	0	NA	1	DEG_GSE189821_Female_Amy
AMT	1	1	DEG_GSE189821_Female_Amy	0	NA
AMY2B	1	1	DEG_GSE189821_Female_Amy	0	NA
ANAPC10	1	1	DEG_GSE189821_Female_Amy	0	NA
ANAPC13	1	1	DEG_GSE273695_Brain_Male_LPS	0	NA
ANGPTL7	1	0	NA	1	DEG_GSE242892_WT
ANK1	1	0	NA	1	DEG_GSE273695_Blood_Female_LPS
ANK2	1	0	NA	1	DEG_GSE273695_Brain_Male_LPS
ANKRD17	1	0	NA	1	DEG_GSE273695_Brain_Male_LPS
ANKRD34C	1	0	NA	1	DEG_GSE273695_Brain_Male_LPS
ANKRD50	1	0	NA	1	DEG_GSE273695_Brain_Male_LPS
ANKRD52	1	0	NA	1	DEG_GSE273695_Brain_Male_LPS
ANKRD55	1	1	DEG_GSE189821_Female_Amy	0	NA
ANKRD63	1	0	NA	1	DEG_GSE189821_Female_Amy
ANKS1B	1	0	NA	1	DEG_GSE189821_Female_Amy
ANTXR1	1	0	NA	1	DEG_GSE273695_Brain_Male_LPS
AP1G1	1	0	NA	1	DEG_GSE273695_Brain_Male_LPS
AP2A2	1	0	NA	1	DEG_GSE189821_Female_Amy
AP2B1	1	0	NA	1	DEG_GSE189821_Female_Amy
AP2S1	1	1	DEG_GSE273695_Brain_Male_LPS	0	NA
AP3S2	1	1	DEG_GSE242892_16p11dup	0	NA
AP4E1	1	0	NA	1	DEG_GSE273695_Brain_Male_LPS
APBA1	1	0	NA	1	DEG_GSE273695_Brain_Male_LPS
APC	1	0	NA	1	DEG_GSE273695_Brain_Male_LPS
APC2	1	0	NA	1	DEG_GSE273695_Brain_Male_LPS
APLNR	1	0	NA	1	DEG_GSE244644_FetalAorta
APOB	1	0	NA	1	DEG_GSE244644_FetalAorta
APOC1	1	1	DEG_GSE189821_Female_Amy	0	NA
APOLD1	1	0	NA	1	DEG_GSE213734_vehicle
APP	1	0	NA	1	DEG_GSE189821_Female_Amy
APPL1	1	0	NA	1	DEG_GSE273695_Brain_Male_LPS
APTX	1	0	NA	1	DEG_GSE273695_Brain_Male_LPS
ARAF	1	1	DEG_GSE189821_Female_Amy	0	NA
ARAP3	1	0	NA	1	DEG_GSE116813_vehicle
AREL1	1	0	NA	1	DEG_GSE189821_Female_Amy
ARF3	1	0	NA	1	DEG_GSE189821_Female_Amy
ARF5	1	1	DEG_GSE273695_Brain_Male_LPS	0	NA
ARFGEF1	1	0	NA	1	DEG_GSE273695_Brain_Male_LPS
ARFGEF2	1	0	NA	1	DEG_GSE273695_Brain_Male_LPS
ARFGEF3	1	0	NA	1	DEG_GSE273695_Brain_Male_LPS
ARHGAP10	1	0	NA	1	DEG_GSE189821_Female_Amy
ARHGAP20	1	0	NA	1	DEG_GSE273695_Brain_Male_LPS
ARHGAP21	1	0	NA	1	DEG_GSE273695_Brain_Male_LPS
ARHGAP24	1	1	DEG_GSE189821_Female_Amy	0	NA
ARHGAP26	1	0	NA	1	DEG_GSE242892_16p11dup
ARHGAP33	1	0	NA	1	DEG_GSE189821_Male_Nac
ARHGAP42	1	1	DEG_GSE189821_Female_VTA	0	NA
ARHGAP44	1	0	NA	1	DEG_GSE189821_Female_Amy
ARHGEF10L	1	1	DEG_GSE116813_vehicle	0	NA
ARHGEF12	1	0	NA	1	DEG_GSE273695_Brain_Male_LPS
ARHGEF17	1	0	NA	1	DEG_GSE189821_Female_Amy
ARHGEF26	1	1	DEG_GSE116813_vehicle	0	NA
ARHGEF40	1	1	DEG_GSE189821_Female_Amy	0	NA
ARID1B	1	0	NA	1	DEG_GSE189821_Male_Nac
ARID2	1	0	NA	1	DEG_GSE273695_Brain_Male_LPS
ARL15	1	0	NA	1	DEG_GSE189821_Female_Amy
ARL4A	1	0	NA	1	DEG_GSE189821_Female_DMS
ARL5A	1	0	NA	1	DEG_GSE273695_Brain_Male_LPS
ARL5B	1	0	NA	1	DEG_GSE213734_vehicle
ARNT2	1	0	NA	1	DEG_GSE273695_Brain_Male_LPS
ARNTL	1	0	NA	1	DEG_GSE189821_Female_Amy
ARPC4	1	1	DEG_GSE273695_Brain_Male_LPS	0	NA
ARPC5L	1	1	DEG_GSE273695_Brain_Male_LPS	0	NA
ASAP2	1	0	NA	1	DEG_GSE273695_Brain_Male_Saline
ASB11	1	0	NA	1	DEG_GSE189821_Female_Amy
ASCL1	1	1	DEG_GSE116813_vehicle	0	NA
ASCL2	1	0	NA	1	DEG_GSE242892_16p11dup
ASH1L	1	0	NA	1	DEG_GSE273695_Brain_Male_LPS
ASMTL	1	1	DEG_GSE273695_Brain_Male_LPS	0	NA
ASPHD1	1	1	DEG_GSE273695_Brain_Male_LPS	0	NA
ASS1	1	1	DEG_GSE189821_Female_Amy	0	NA
ASTN1	1	1	DEG_GSE242892_16p11dup	0	NA
ASXL2	1	0	NA	1	DEG_GSE273695_Brain_Male_LPS
ASXL3	1	0	NA	1	DEG_GSE273695_Brain_Male_LPS
ATAD5	1	0	NA	1	DEG_GSE242892_16p11dup
ATF4	1	1	DEG_GSE273695_Brain_Male_LPS	0	NA
ATG10	1	1	DEG_GSE189821_Female_Amy	0	NA
ATG13	1	0	NA	1	DEG_GSE189821_Female_Amy
ATG2B	1	0	NA	1	DEG_GSE273695_Brain_Male_LPS
ATL3	1	0	NA	1	DEG_GSE273695_Brain_Male_LPS
ATM	1	0	NA	1	DEG_GSE273695_Brain_Male_LPS
ATOX1	1	1	DEG_GSE273695_Brain_Male_LPS	0	NA
ATP11A	1	0	NA	1	DEG_GSE273695_Brain_Male_LPS
ATP11B	1	0	NA	1	DEG_GSE273695_Brain_Male_LPS
ATP13A3	1	0	NA	1	DEG_GSE273695_Brain_Male_LPS
ATP1A1	1	0	NA	1	DEG_GSE189821_Female_Amy
ATP1B3	1	1	DEG_GSE189821_Male_Nac	0	NA
ATP2B1	1	0	NA	1	DEG_GSE189821_Female_Amy
ATP5F1D	1	1	DEG_GSE273695_Brain_Male_LPS	0	NA
ATP5IF1	1	1	DEG_GSE273695_Brain_Male_LPS	0	NA
ATP5MF	1	1	DEG_GSE273695_Brain_Male_LPS	0	NA
ATP5PD	1	1	DEG_GSE273695_Brain_Male_LPS	0	NA
ATP5PO	1	1	DEG_GSE273695_Brain_Male_LPS	0	NA
ATP6V0A1	1	0	NA	1	DEG_GSE189821_Female_Amy
ATP6V1G2	1	0	NA	1	DEG_GSE189821_Female_Amy
ATP8A2	1	0	NA	1	DEG_GSE273695_Brain_Male_LPS
ATPAF1	1	0	NA	1	DEG_GSE181487
ATPAF2	1	1	DEG_GSE242892_16p11dup	0	NA
ATR	1	0	NA	1	DEG_GSE273695_Brain_Male_LPS
ATRNL1	1	0	NA	1	DEG_GSE189821_Female_Amy
ATXN1	1	0	NA	1	DEG_GSE273695_Brain_Male_LPS
ATXN7L3	1	1	DEG_GSE189821_Female_DMS	0	NA
AURKAIP1	1	1	DEG_GSE273695_Brain_Male_LPS	0	NA
B3GALT6	1	0	NA	1	DEG_GSE242892_WT
B4GALNT1	1	0	NA	1	DEG_GSE189821_Female_Amy
B4GALNT4	1	0	NA	1	DEG_GSE189821_Female_DMS
B4GALT1	1	0	NA	1	DEG_GSE116813_vehicle
BAIAP2	1	0	NA	1	DEG_GSE189821_Female_Amy
BAIAP2L1	1	1	DEG_GSE235969_Female_Old_5wk	0	NA
BAIAP3	1	1	DEG_GSE189821_Female_Amy	0	NA
BARX2	1	1	DEG_GSE189821_Female_Amy	0	NA
BBS2	1	1	DEG_GSE189821_Female_Amy	0	NA
BCL2L13	1	0	NA	1	DEG_GSE189821_Female_Amy
BCL6	1	0	NA	1	DEG_GSE244644_FetalAorta
BCL7B	1	0	NA	1	DEG_GSE242892_16p11dup
BCL9L	1	0	NA	1	DEG_GSE235969_Female_Old_5d
BCOR	1	1	DEG_GSE242892_16p11dup	0	NA
BCORL1	1	0	NA	1	DEG_GSE242892_16p11dup
BDNF	1	1	DEG_GSE273695_Brain_Male_LPS	0	NA
BEX1	1	1	DEG_GSE189821_Female_Amy	0	NA
BEX4	1	1	DEG_GSE189821_Female_Amy	0	NA
BFSP2	1	1	DEG_GSE189821_Female_VTA	0	NA
BHLHB9	1	1	DEG_GSE242892_16p11dup	0	NA
BICC1	1	0	NA	1	DEG_GSE116813_vehicle
BICD1	1	0	NA	1	DEG_GSE273695_Brain_Male_LPS
BICRAL	1	0	NA	1	DEG_GSE273695_Brain_Male_LPS
BIRC6	1	0	NA	1	DEG_GSE273695_Brain_Male_LPS
BLNK	1	0	NA	1	DEG_GSE189821_Female_Amy
BLVRA	1	1	DEG_GSE189821_Female_Amy	0	NA
BMP5	1	0	NA	1	DEG_GSE116813_vehicle
BMP6	1	0	NA	1	DEG_GSE116813_vehicle
BMP7	1	0	NA	1	DEG_GSE116813_vehicle
BNIP3L	1	0	NA	1	DEG_GSE242892_WT
BOC	1	0	NA	1	DEG_GSE189821_Female_Amy
BOLA2B	1	1	DEG_GSE273695_Brain_Male_LPS	0	NA
BPTF	1	0	NA	1	DEG_GSE273695_Brain_Male_LPS
BRAF	1	0	NA	1	DEG_GSE273695_Brain_Male_LPS
BRI3	1	1	DEG_GSE273695_Brain_Male_LPS	0	NA
BRINP1	1	0	NA	1	DEG_GSE189821_Female_Amy
BRIX1	1	1	DEG_GSE189821_Female_Amy	0	NA
BRS3	1	1	DEG_GSE189821_Female_Amy	0	NA
BTBD11	1	0	NA	1	DEG_GSE273695_Brain_Male_LPS
BTBD7	1	0	NA	1	DEG_GSE273695_Brain_Male_LPS
BTG2	1	0	NA	1	DEG_GSE213734_vehicle
C11orf58	1	1	DEG_GSE189821_Female_Amy	0	NA
C11orf94	1	1	DEG_GSE242892_16p11dup	0	NA
C11orf96	1	1	DEG_GSE273695_Brain_Male_LPS	0	NA
C12orf73	1	1	DEG_GSE242892_16p11dup	0	NA
C14orf28	1	1	DEG_GSE189821_Female_Amy	0	NA
C15orf40	1	1	DEG_GSE189821_Female_Amy	0	NA
C15orf48	1	1	DEG_GSE244644_FetalAorta	0	NA
C17orf75	1	0	NA	1	DEG_GSE273695_Brain_Male_LPS
C19orf71	1	0	NA	1	DEG_GSE242892_WT
C1D	1	1	DEG_GSE189821_Female_Amy	0	NA
C1GALT1	1	0	NA	1	DEG_GSE273695_Brain_Male_LPS
C1orf198	1	1	DEG_GSE189821_Female_Amy	0	NA
C1orf35	1	1	DEG_GSE273695_Brain_Male_LPS	0	NA
C1orf50	1	1	DEG_GSE242892_16p11dup	0	NA
C1orf53	1	1	DEG_GSE189821_Female_Amy	0	NA
C1QL3	1	0	NA	1	DEG_GSE189821_Female_Amy
C2CD2	1	0	NA	1	DEG_GSE273695_Brain_Male_LPS
C2CD3	1	0	NA	1	DEG_GSE273695_Brain_Male_LPS
C2orf69	1	0	NA	1	DEG_GSE242892_16p11dup
C3	1	1	DEG_GSE116813_DISC1	0	NA
C4B	1	1	DEG_GSE242892_16p11dup	0	NA
C4orf33	1	1	DEG_GSE235969_Female_Old_5wk	0	NA
C4orf48	1	1	DEG_GSE273695_Brain_Male_LPS	0	NA
C9orf78	1	0	NA	1	DEG_GSE242892_16p11dup
CA11	1	0	NA	1	DEG_GSE189821_Male_Nac
CA7	1	0	NA	1	DEG_GSE189821_Female_Amy
CABLES2	1	0	NA	1	DEG_GSE189821_Female_Amy
CABP7	1	0	NA	1	DEG_GSE189821_Female_Amy
CACFD1	1	1	DEG_GSE242892_16p11dup	0	NA
CACNA1A	1	0	NA	1	DEG_GSE189821_Female_Amy
CACNA1C	1	0	NA	1	DEG_GSE273695_Brain_Male_LPS
CACNA1D	1	0	NA	1	DEG_GSE273695_Brain_Male_LPS
CACNA1I	1	0	NA	1	DEG_GSE273695_Brain_Male_LPS
CACNA2D3	1	0	NA	1	DEG_GSE189821_Male_Nac
CACNB1	1	0	NA	1	DEG_GSE189821_Female_Amy
CACNG3	1	0	NA	1	DEG_GSE189821_Female_Amy
CACNG7	1	1	DEG_GSE242892_16p11dup	0	NA
CACNG8	1	0	NA	1	DEG_GSE189821_Female_Amy
CACUL1	1	0	NA	1	DEG_GSE273695_Brain_Male_LPS
CACYBP	1	1	DEG_GSE189821_Male_Nac	0	NA
CAD	1	0	NA	1	DEG_GSE242892_WT
CADM2	1	0	NA	1	DEG_GSE273695_Brain_Male_LPS
CALD1	1	0	NA	1	DEG_GSE116813_vehicle
CALML4	1	1	DEG_GSE235969_Male_Young_5wk	0	NA
CALR	1	1	DEG_GSE273695_Brain_Male_LPS	0	NA
CALY	1	1	DEG_GSE273695_Brain_Male_LPS	0	NA
CAMK2N1	1	1	DEG_GSE273695_Brain_Male_LPS	0	NA
CAMK2N2	1	1	DEG_GSE189821_Female_Amy	0	NA
CAMK4	1	0	NA	1	DEG_GSE189821_Female_Amy
CAMKK1	1	0	NA	1	DEG_GSE189821_Female_Amy
CAMKK2	1	0	NA	1	DEG_GSE189821_Female_Amy
CAMSAP2	1	0	NA	1	DEG_GSE273695_Brain_Male_LPS
CAMTA2	1	0	NA	1	DEG_GSE189821_Female_Amy
CAND1	1	0	NA	1	DEG_GSE273695_Brain_Male_LPS
CAP1	1	0	NA	1	DEG_GSE189821_Female_Amy
CAPN1	1	0	NA	1	DEG_GSE189821_Female_Amy
CAPN10	1	0	NA	1	DEG_GSE242892_WT
CAPN11	1	0	NA	1	DEG_GSE242892_16p11dup
CAPZB	1	0	NA	1	DEG_GSE116813_vehicle
CARD11	1	0	NA	1	DEG_GSE242892_16p11dup
CARMIL3	1	1	DEG_GSE116813_vehicle	0	NA
CARTPT	1	1	DEG_GSE189821_Female_Amy	0	NA
CASK	1	0	NA	1	DEG_GSE273695_Brain_Male_LPS
CASKIN2	1	1	DEG_GSE189821_Female_DMS	0	NA
CAST	1	0	NA	1	DEG_GSE273695_Brain_Male_LPS
CAVIN1	1	0	NA	1	DEG_GSE235969_Female_Old_5d
CBFA2T3	1	0	NA	1	DEG_GSE189821_Female_Amy
CBL	1	0	NA	1	DEG_GSE273695_Brain_Male_LPS
CBLB	1	0	NA	1	DEG_GSE273695_Brain_Male_LPS
CBLN2	1	1	DEG_GSE189821_Female_Amy	0	NA
CCAR2	1	0	NA	1	DEG_GSE242892_WT
CCDC106	1	0	NA	1	DEG_GSE189821_Male_Nac
CCDC12	1	1	DEG_GSE273695_Brain_Male_LPS	0	NA
CCDC13	1	1	DEG_GSE181487	0	NA
CCDC134	1	0	NA	1	DEG_GSE189821_Female_Amy
CCDC166	1	0	NA	1	DEG_GSE242892_WT
CCDC190	1	1	DEG_GSE189821_Female_Amy	0	NA
CCDC28B	1	1	DEG_GSE189821_Female_Amy	0	NA
CCDC3	1	0	NA	1	DEG_GSE189821_Female_Amy
CCDC6	1	0	NA	1	DEG_GSE273695_Brain_Male_LPS
CCDC73	1	0	NA	1	DEG_GSE242892_WT
CCDC77	1	1	DEG_GSE273695_Brain_Female_LPS	0	NA
CCDC85A	1	0	NA	1	DEG_GSE116813_vehicle
CCDC85B	1	1	DEG_GSE273695_Brain_Male_LPS	0	NA
CCDC88A	1	0	NA	1	DEG_GSE273695_Brain_Male_LPS
CCDC91	1	1	DEG_GSE189821_Male_Nac	0	NA
CCDC92	1	1	DEG_GSE116813_vehicle	0	NA
CCER2	1	1	DEG_GSE189821_Female_Amy	0	NA
CCK	1	1	DEG_GSE273695_Brain_Male_LPS	0	NA
CCKBR	1	0	NA	1	DEG_GSE189821_Female_Amy
CCL27	1	1	DEG_GSE273695_Brain_Male_LPS	0	NA
CCN1	1	0	NA	1	DEG_GSE213734_vehicle
CCN2	1	0	NA	1	DEG_GSE189821_Female_Amy
CCN3	1	0	NA	1	DEG_GSE189821_Female_Amy
CCR1	1	0	NA	1	DEG_GSE242892_16p11dup
CCT6A	1	1	DEG_GSE189821_Female_Amy	0	NA
CD101	1	0	NA	1	DEG_GSE242892_16p11dup
CD14	1	1	DEG_GSE273695_Blood_Male_LPS	0	NA
CD22	1	0	NA	1	DEG_GSE242892_16p11dup
CD36	1	0	NA	1	DEG_GSE244644_FetalAorta
CD38	1	1	DEG_GSE189821_Female_Amy	0	NA
CD6	1	0	NA	1	DEG_GSE189821_Female_Amy
CD63	1	1	DEG_GSE273695_Blood_Male_Saline	0	NA
CD72	1	1	DEG_GSE189821_Female_DMS	0	NA
CD74	1	1	DEG_GSE116813_DISC1	0	NA
CD81	1	1	DEG_GSE189821_Female_Amy	0	NA
CD83	1	1	DEG_GSE189821_Female_Amy	0	NA
CD9	1	1	DEG_GSE273695_Brain_Male_LPS	0	NA
CD99L2	1	1	DEG_GSE189821_Female_Amy	0	NA
CDC34	1	1	DEG_GSE273695_Brain_Male_LPS	0	NA
CDC42BPA	1	0	NA	1	DEG_GSE273695_Brain_Male_LPS
CDC45	1	1	DEG_GSE273695_Brain_Male_LPS	0	NA
CDH11	1	1	DEG_GSE189821_Female_DMS	0	NA
CDH12	1	0	NA	1	DEG_GSE273695_Brain_Male_LPS
CDH18	1	0	NA	1	DEG_GSE273695_Brain_Male_LPS
CDH20	1	1	DEG_GSE116813_vehicle	0	NA
CDH23	1	0	NA	1	DEG_GSE189821_Male_Amy
CDH6	1	0	NA	1	DEG_GSE273695_Brain_Male_LPS
CDH8	1	0	NA	1	DEG_GSE273695_Brain_Male_LPS
CDH9	1	0	NA	1	DEG_GSE189821_Female_Amy
CDHR2	1	1	DEG_GSE189821_Female_Amy	0	NA
CDK18	1	1	DEG_GSE116813_vehicle	0	NA
CDK2AP1	1	1	DEG_GSE273695_Brain_Male_LPS	0	NA
CDKL1	1	0	NA	1	DEG_GSE273695_Blood_Female_LPS
CDKL5	1	0	NA	1	DEG_GSE189821_Female_Amy
CDKN1A	1	1	DEG_GSE273695_Brain_Male_LPS	0	NA
CDR2	1	0	NA	1	DEG_GSE273695_Blood_Male_Saline
CDS1	1	1	DEG_GSE189821_Male_Nac	0	NA
CDS2	1	0	NA	1	DEG_GSE273695_Brain_Male_LPS
CDYL2	1	0	NA	1	DEG_GSE273695_Brain_Male_LPS
CEBPD	1	1	DEG_GSE273695_Brain_Male_LPS	0	NA
CECR2	1	0	NA	1	DEG_GSE244644_FetalAorta
CELF2	1	0	NA	1	DEG_GSE189821_Female_Amy
CELF5	1	0	NA	1	DEG_GSE189821_Male_Nac
CELF6	1	1	DEG_GSE189821_Female_Amy	0	NA
CELSR2	1	0	NA	1	DEG_GSE273695_Brain_Male_LPS
CEMIP	1	0	NA	1	DEG_GSE273695_Brain_Male_LPS
CENPE	1	1	DEG_GSE244644_UmbilicalVein	0	NA
CEP126	1	0	NA	1	DEG_GSE189821_Female_Amy
CEP128	1	0	NA	1	DEG_GSE213734_vehicle
CEP170	1	0	NA	1	DEG_GSE273695_Brain_Male_LPS
CEP170B	1	1	DEG_GSE116813_vehicle	0	NA
CEP350	1	0	NA	1	DEG_GSE273695_Brain_Male_LPS
CERS4	1	0	NA	1	DEG_GSE273695_Brain_Male_LPS
CFAP298	1	0	NA	1	DEG_GSE242892_WT
CFAP97	1	0	NA	1	DEG_GSE273695_Brain_Male_LPS
CFDP1	1	1	DEG_GSE189821_Female_Amy	0	NA
CFH	1	0	NA	1	DEG_GSE116813_vehicle
CFL1	1	1	DEG_GSE273695_Brain_Male_LPS	0	NA
CGRRF1	1	1	DEG_GSE242892_16p11dup	0	NA
CHCHD2	1	1	DEG_GSE273695_Brain_Male_LPS	0	NA
CHCHD4	1	0	NA	1	DEG_GSE242892_16p11dup
CHCHD5	1	1	DEG_GSE181487	0	NA
CHCHD6	1	1	DEG_GSE273695_Brain_Male_LPS	0	NA
CHD2	1	0	NA	1	DEG_GSE273695_Brain_Male_LPS
CHD5	1	0	NA	1	DEG_GSE273695_Brain_Male_LPS
CHD8	1	0	NA	1	DEG_GSE273695_Brain_Male_LPS
CHD9	1	0	NA	1	DEG_GSE273695_Brain_Male_LPS
CHGA	1	1	DEG_GSE273695_Brain_Male_LPS	0	NA
CHGB	1	0	NA	1	DEG_GSE189821_Female_Amy
CHL1	1	0	NA	1	DEG_GSE273695_Brain_Male_LPS
CHML	1	0	NA	1	DEG_GSE273695_Brain_Male_LPS
CHMP2A	1	1	DEG_GSE273695_Brain_Male_LPS	0	NA
CHP1	1	1	DEG_GSE189821_Female_DMS	0	NA
CHRD	1	0	NA	1	DEG_GSE189821_Female_Amy
CHRFAM7A	1	0	NA	1	DEG_GSE273695_Brain_Male_LPS
CHRM1	1	0	NA	1	DEG_GSE189821_Female_Amy
CHRNA4	1	0	NA	1	DEG_GSE189821_Female_Amy
CHRNA5	1	0	NA	1	DEG_GSE273695_Brain_Male_LPS
CHRNB2	1	0	NA	1	DEG_GSE273695_Brain_Male_LPS
CHST11	1	0	NA	1	DEG_GSE273695_Brain_Male_LPS
CHST9	1	1	DEG_GSE189821_Female_Amy	0	NA
CHSY3	1	1	DEG_GSE116813_vehicle	0	NA
CIART	1	1	DEG_GSE273695_Brain_Male_Saline	0	NA
CIDEA	1	1	DEG_GSE189821_Female_Amy	0	NA
CINP	1	0	NA	1	DEG_GSE189821_Male_Nac
CISD1	1	0	NA	1	DEG_GSE242892_16p11dup
CISD3	1	1	DEG_GSE273695_Brain_Male_LPS	0	NA
CIT	1	0	NA	1	DEG_GSE273695_Brain_Male_LPS
CKB	1	1	DEG_GSE273695_Brain_Male_LPS	0	NA
CLASRP	1	1	DEG_GSE242892_16p11dup	0	NA
CLCN4	1	0	NA	1	DEG_GSE273695_Brain_Male_LPS
CLCN6	1	0	NA	1	DEG_GSE273695_Brain_Male_LPS
CLDN2	1	1	DEG_GSE235969_Male_Young_5wk	0	NA
CLDND1	1	1	DEG_GSE116813_vehicle	0	NA
CLEC12A	1	0	NA	1	DEG_GSE189821_Female_DMS
CLEC18B	1	0	NA	1	DEG_GSE189821_Female_Amy
CLIC4	1	0	NA	1	DEG_GSE273695_Brain_Female_LPS
CLK1	1	0	NA	1	DEG_GSE189821_Male_Nac
CLN8	1	0	NA	1	DEG_GSE213734_vehicle
CLOCK	1	0	NA	1	DEG_GSE273695_Brain_Male_LPS
CLSTN1	1	0	NA	1	DEG_GSE189821_Female_Amy
CLSTN2	1	0	NA	1	DEG_GSE273695_Brain_Male_LPS
CLU	1	1	DEG_GSE242892_16p11dup	0	NA
CLVS2	1	0	NA	1	DEG_GSE273695_Brain_Male_LPS
CMAS	1	1	DEG_GSE189821_Male_Nac	0	NA
CNBP	1	1	DEG_GSE273695_Brain_Male_LPS	0	NA
CNGB1	1	1	DEG_GSE189821_Female_Amy	0	NA
CNIH3	1	0	NA	1	DEG_GSE189821_Female_Amy
CNKSR2	1	0	NA	1	DEG_GSE189821_Female_Amy
CNN2	1	0	NA	1	DEG_GSE235969_Female_Old_5d
CNNM1	1	0	NA	1	DEG_GSE273695_Brain_Male_LPS
CNOT1	1	0	NA	1	DEG_GSE273695_Brain_Male_LPS
CNOT6L	1	0	NA	1	DEG_GSE273695_Brain_Male_LPS
CNPY3	1	1	DEG_GSE273695_Brain_Male_LPS	0	NA
CNST	1	0	NA	1	DEG_GSE189821_Female_Amy
CNTN1	1	0	NA	1	DEG_GSE273695_Brain_Male_LPS
CNTN2	1	0	NA	1	DEG_GSE273695_Brain_Male_LPS
CNTN5	1	0	NA	1	DEG_GSE273695_Brain_Male_LPS
CNTNAP1	1	0	NA	1	DEG_GSE189821_Female_Amy
CNTNAP5	1	0	NA	1	DEG_GSE273695_Brain_Male_LPS
COCH	1	0	NA	1	DEG_GSE273695_Brain_Female_LPS
COL19A1	1	0	NA	1	DEG_GSE273695_Brain_Male_LPS
COL23A1	1	1	DEG_GSE189821_Female_Amy	0	NA
COL25A1	1	1	DEG_GSE242892_16p11dup	0	NA
COL5A2	1	0	NA	1	DEG_GSE189821_Female_Amy
COL6A1	1	0	NA	1	DEG_GSE189821_Male_Nac
COL8A2	1	1	DEG_GSE235969_Male_Young_5wk	0	NA
COL9A2	1	1	DEG_GSE189821_Female_Amy	0	NA
COLEC12	1	0	NA	1	DEG_GSE116813_vehicle
COMMD1	1	1	DEG_GSE189821_Female_Amy	0	NA
COPRS	1	1	DEG_GSE273695_Brain_Male_LPS	0	NA
COQ10B	1	1	DEG_GSE273695_Brain_Male_LPS	0	NA
CORO1A	1	1	DEG_GSE273695_Brain_Male_LPS	0	NA
CORO7	1	1	DEG_GSE198578	0	NA
COX4I1	1	1	DEG_GSE273695_Brain_Male_LPS	0	NA
COX5B	1	1	DEG_GSE273695_Brain_Male_LPS	0	NA
COX6A1	1	1	DEG_GSE273695_Brain_Male_LPS	0	NA
COX6C	1	1	DEG_GSE273695_Brain_Male_LPS	0	NA
COX7B	1	1	DEG_GSE273695_Brain_Male_LPS	0	NA
CP	1	0	NA	1	DEG_GSE116813_vehicle
CPD	1	0	NA	1	DEG_GSE273695_Brain_Male_LPS
CPE	1	1	DEG_GSE213734_vehicle	0	NA
CPEB3	1	0	NA	1	DEG_GSE273695_Brain_Male_LPS
CPEB4	1	0	NA	1	DEG_GSE273695_Brain_Male_LPS
CPED1	1	0	NA	1	DEG_GSE116813_vehicle
CPLX1	1	0	NA	1	DEG_GSE189821_Female_Amy
CPNE3	1	0	NA	1	DEG_GSE273695_Brain_Male_LPS
CPNE5	1	0	NA	1	DEG_GSE189821_Male_Nac
CPNE7	1	1	DEG_GSE273695_Blood_Male_LPS	0	NA
CPXM2	1	0	NA	1	DEG_GSE189821_Female_Amy
CREB1	1	0	NA	1	DEG_GSE273695_Brain_Male_LPS
CREB3L1	1	0	NA	1	DEG_GSE189821_Female_Amy
CREBRF	1	0	NA	1	DEG_GSE273695_Brain_Male_LPS
CREG2	1	0	NA	1	DEG_GSE189821_Female_Amy
CRELD2	1	1	DEG_GSE189821_Female_Amy	0	NA
CRIM1	1	0	NA	1	DEG_GSE273695_Brain_Male_LPS
CRISPLD1	1	0	NA	1	DEG_GSE116813_vehicle
CRLF1	1	1	DEG_GSE235969_Female_Old_5d	0	NA
CRLF2	1	0	NA	1	DEG_GSE242892_16p11dup
CROCC	1	0	NA	1	DEG_GSE189821_Male_Nac
CRY2	1	0	NA	1	DEG_GSE189821_Female_Amy
CSMD3	1	0	NA	1	DEG_GSE273695_Brain_Male_LPS
CSNK1G1	1	0	NA	1	DEG_GSE189821_Female_Amy
CSRNP1	1	1	DEG_GSE273695_Brain_Male_LPS	0	NA
CSRNP2	1	0	NA	1	DEG_GSE189821_Female_Amy
CSRNP3	1	0	NA	1	DEG_GSE273695_Brain_Male_LPS
CSTB	1	1	DEG_GSE189821_Female_Amy	0	NA
CTNNA1	1	1	DEG_GSE242892_16p11dup	0	NA
CTPS2	1	1	DEG_GSE189821_Female_Amy	0	NA
CTSS	1	1	DEG_GSE273695_Brain_Male_LPS	0	NA
CTXN2	1	1	DEG_GSE189821_Female_Amy	0	NA
CUL5	1	0	NA	1	DEG_GSE273695_Brain_Male_LPS
CWC15	1	1	DEG_GSE273695_Brain_Male_LPS	0	NA
CX3CL1	1	0	NA	1	DEG_GSE189821_Female_Amy
CXCL16	1	1	DEG_GSE273695_Blood_Male_LPS	0	NA
CXorf38	1	1	DEG_GSE189821_Female_Amy	0	NA
CYB5A	1	1	DEG_GSE273695_Brain_Male_LPS	0	NA
CYP19A1	1	1	DEG_GSE189821_Female_Amy	0	NA
CYP26B1	1	0	NA	1	DEG_GSE189821_Female_Amy
CYP2J2	1	1	DEG_GSE189821_Female_Amy	0	NA
CYP46A1	1	1	DEG_GSE189821_Female_DMS	0	NA
CYP51A1	1	1	DEG_GSE189821_Female_Amy	0	NA
DAB2	1	0	NA	1	DEG_GSE116813_vehicle
DAB2IP	1	1	DEG_GSE189821_Female_DMS	0	NA
DACT2	1	0	NA	1	DEG_GSE189821_Female_Amy
DAD1	1	1	DEG_GSE273695_Brain_Male_LPS	0	NA
DAGLA	1	0	NA	1	DEG_GSE189821_Female_Amy
DAGLB	1	0	NA	1	DEG_GSE189821_Female_Amy
DAP	1	0	NA	1	DEG_GSE244644_UmbilicalVein
DBI	1	1	DEG_GSE273695_Brain_Male_LPS	0	NA
DBP	1	0	NA	1	DEG_GSE242892_16p11dup
DCAF11	1	0	NA	1	DEG_GSE198578
DCAF17	1	0	NA	1	DEG_GSE273695_Brain_Male_LPS
DCAF5	1	0	NA	1	DEG_GSE189821_Female_Amy
DCC	1	0	NA	1	DEG_GSE273695_Brain_Male_LPS
DCHS1	1	0	NA	1	DEG_GSE273695_Brain_Male_LPS
DCTD	1	1	DEG_GSE242892_WT	0	NA
DDRGK1	1	1	DEG_GSE189821_Female_Amy	0	NA
DDX54	1	0	NA	1	DEG_GSE189821_Female_Amy
DDX6	1	0	NA	1	DEG_GSE273695_Brain_Male_LPS
DENND1B	1	0	NA	1	DEG_GSE273695_Brain_Male_LPS
DENND4A	1	0	NA	1	DEG_GSE273695_Brain_Male_LPS
DENND5B	1	1	DEG_GSE242892_WT	0	NA
DEPDC5	1	0	NA	1	DEG_GSE273695_Brain_Male_LPS
DFFA	1	0	NA	1	DEG_GSE242892_16p11dup
DFFB	1	0	NA	1	DEG_GSE242892_WT
DGCR6L	1	1	DEG_GSE273695_Brain_Male_LPS	0	NA
DGKE	1	0	NA	1	DEG_GSE273695_Brain_Male_LPS
DGKI	1	0	NA	1	DEG_GSE273695_Brain_Male_LPS
DGKZ	1	0	NA	1	DEG_GSE189821_Female_Amy
DHRSX	1	1	DEG_GSE273695_Brain_Male_LPS	0	NA
DIAPH1	1	0	NA	1	DEG_GSE189821_Female_Amy
DICER1	1	0	NA	1	DEG_GSE273695_Brain_Male_LPS
DIP2B	1	0	NA	1	DEG_GSE273695_Brain_Male_LPS
DIP2C	1	0	NA	1	DEG_GSE273695_Brain_Male_LPS
DIRAS2	1	0	NA	1	DEG_GSE189821_Female_Amy
DIS3	1	0	NA	1	DEG_GSE242892_WT
DISP2	1	0	NA	1	DEG_GSE273695_Brain_Male_LPS
DIXDC1	1	0	NA	1	DEG_GSE273695_Brain_Male_LPS
DKK3	1	0	NA	1	DEG_GSE189821_Female_Amy
DLC1	1	0	NA	1	DEG_GSE189821_Female_Amy
DLEU7	1	1	DEG_GSE189821_Female_Amy	0	NA
DLG3	1	0	NA	1	DEG_GSE189821_Female_Amy
DLG4	1	0	NA	1	DEG_GSE189821_Female_Amy
DLGAP1	1	0	NA	1	DEG_GSE189821_Female_Amy
DLGAP2	1	0	NA	1	DEG_GSE273695_Brain_Male_LPS
DLGAP3	1	0	NA	1	DEG_GSE189821_Female_Amy
DLGAP4	1	0	NA	1	DEG_GSE189821_Female_Amy
DLK2	1	1	DEG_GSE273695_Brain_Male_LPS	0	NA
DLX2	1	1	DEG_GSE189821_Female_Amy	0	NA
DMP1	1	0	NA	1	DEG_GSE189821_Female_Amy
DMXL1	1	0	NA	1	DEG_GSE273695_Brain_Male_LPS
DMXL2	1	0	NA	1	DEG_GSE273695_Brain_Male_LPS
DNAH7	1	1	DEG_GSE189821_Female_Amy	0	NA
DNAH9	1	0	NA	1	DEG_GSE189821_Female_Amy
DNAJA4	1	0	NA	1	DEG_GSE216112
DNAJB14	1	0	NA	1	DEG_GSE273695_Brain_Male_LPS
DNAJC11	1	1	DEG_GSE189821_Female_DMS	0	NA
DNAJC13	1	0	NA	1	DEG_GSE273695_Brain_Male_LPS
DNAJC18	1	0	NA	1	DEG_GSE273695_Brain_Male_LPS
DNAJC21	1	1	DEG_GSE189821_Female_Amy	0	NA
DNAJC6	1	0	NA	1	DEG_GSE273695_Brain_Male_LPS
DNM1	1	0	NA	1	DEG_GSE189821_Female_Amy
DNM3	1	0	NA	1	DEG_GSE273695_Brain_Male_LPS
DOCK7	1	0	NA	1	DEG_GSE273695_Brain_Male_LPS
DOCK9	1	0	NA	1	DEG_GSE189821_Female_Amy
DOT1L	1	0	NA	1	DEG_GSE242892_16p11dup
DPCD	1	1	DEG_GSE273695_Brain_Male_LPS	0	NA
DPM1	1	0	NA	1	DEG_GSE242892_WT
DPM3	1	1	DEG_GSE273695_Brain_Male_LPS	0	NA
DPP10	1	1	DEG_GSE116813_vehicle	0	NA
DPP6	1	0	NA	1	DEG_GSE273695_Brain_Male_LPS
DPP8	1	0	NA	1	DEG_GSE273695_Brain_Male_LPS
DPY19L3	1	0	NA	1	DEG_GSE189821_Male_Nac
DPYD	1	1	DEG_GSE189821_Female_Amy	0	NA
DPYSL2	1	1	DEG_GSE213734_vehicle	0	NA
DRD2	1	0	NA	1	DEG_GSE273695_Brain_Male_LPS
DSCAM	1	0	NA	1	DEG_GSE273695_Brain_Male_LPS
DST	1	0	NA	1	DEG_GSE273695_Brain_Male_LPS
DUSP1	1	0	NA	1	DEG_GSE213734_vehicle
DUSP18	1	0	NA	1	DEG_GSE189821_Female_Amy
DUSP26	1	1	DEG_GSE189821_Female_Amy	0	NA
DUSP3	1	1	DEG_GSE213734_vehicle	0	NA
DUSP5	1	0	NA	1	DEG_GSE213734_vehicle
DYNC1H1	1	0	NA	1	DEG_GSE273695_Brain_Male_LPS
DYRK2	1	0	NA	1	DEG_GSE189821_Female_Amy
E2F1	1	0	NA	1	DEG_GSE189821_Female_Amy
E2F3	1	0	NA	1	DEG_GSE189821_Female_Amy
E2F7	1	1	DEG_GSE189821_Female_Amy	0	NA
EBF4	1	1	DEG_GSE189821_Female_Amy	0	NA
ECE2	1	1	DEG_GSE189821_Female_Amy	0	NA
ECHDC1	1	1	DEG_GSE242892_16p11dup	0	NA
ECM1	1	0	NA	1	DEG_GSE116813_vehicle
ECRG4	1	1	DEG_GSE235969_Male_Young_5wk	0	NA
ECSCR	1	1	DEG_GSE181487	0	NA
EDEM3	1	0	NA	1	DEG_GSE273695_Brain_Male_LPS
EDF1	1	1	DEG_GSE273695_Brain_Male_LPS	0	NA
EDNRB	1	1	DEG_GSE189821_Female_Amy	0	NA
EEA1	1	0	NA	1	DEG_GSE273695_Brain_Male_LPS
EEF1AKMT1	1	0	NA	1	DEG_GSE242892_WT
EEF1AKMT4	1	0	NA	1	DEG_GSE242892_16p11dup
EEF1B2	1	1	DEG_GSE273695_Brain_Male_LPS	0	NA
EFCAB13	1	0	NA	1	DEG_GSE189821_Female_Amy
EFEMP1	1	0	NA	1	DEG_GSE116813_vehicle
EFHD2	1	1	DEG_GSE116813_vehicle	0	NA
EFNA5	1	0	NA	1	DEG_GSE273695_Brain_Male_LPS
EFNB2	1	0	NA	1	DEG_GSE273695_Brain_Male_LPS
EGR1	1	0	NA	1	DEG_GSE213734_vehicle
EGR3	1	0	NA	1	DEG_GSE189821_Female_Amy
EHBP1	1	1	DEG_GSE242892_16p11dup	0	NA
EHBP1L1	1	1	DEG_GSE273695_Brain_Male_LPS	0	NA
EHD3	1	0	NA	1	DEG_GSE189821_Female_Amy
EIF1AX	1	1	DEG_GSE242892_16p11dup	0	NA
EIF2AK4	1	1	DEG_GSE242892_16p11dup	0	NA
EIF4G1	1	0	NA	1	DEG_GSE189821_Female_Amy
EIF5B	1	1	DEG_GSE273695_Brain_Male_LPS	0	NA
EIF6	1	1	DEG_GSE273695_Brain_Male_LPS	0	NA
ELAC1	1	1	DEG_GSE189821_Female_Amy	0	NA
ELAVL4	1	1	DEG_GSE116813_vehicle	0	NA
ELL	1	0	NA	1	DEG_GSE242892_16p11dup
ELOB	1	1	DEG_GSE273695_Brain_Male_LPS	0	NA
ELOVL6	1	1	DEG_GSE189821_Female_DMS	0	NA
ELP1	1	0	NA	1	DEG_GSE273695_Brain_Male_LPS
EMC8	1	1	DEG_GSE242892_WT	0	NA
EMCN	1	1	DEG_GSE181487	0	NA
EMG1	1	0	NA	1	DEG_GSE181487
EMP3	1	0	NA	1	DEG_GSE242892_16p11dup
EMX1	1	0	NA	1	DEG_GSE189821_Female_Amy
EMX2	1	1	DEG_GSE189821_Female_Amy	0	NA
ENAH	1	0	NA	1	DEG_GSE273695_Brain_Male_LPS
ENC1	1	0	NA	1	DEG_GSE189821_Female_Amy
ENDOD1	1	0	NA	1	DEG_GSE273695_Brain_Male_LPS
ENHO	1	1	DEG_GSE273695_Brain_Male_LPS	0	NA
ENO3	1	0	NA	1	DEG_GSE242892_16p11dup
ENPP2	1	0	NA	1	DEG_GSE242892_16p11dup
ENPP5	1	0	NA	1	DEG_GSE273695_Brain_Male_LPS
EOMES	1	0	NA	1	DEG_GSE213734_LPS
EP300	1	0	NA	1	DEG_GSE273695_Brain_Male_LPS
EP400	1	0	NA	1	DEG_GSE273695_Brain_Male_LPS
EPAS1	1	0	NA	1	DEG_GSE116813_vehicle
EPB41L3	1	1	DEG_GSE189821_Male_Nac	0	NA
EPB42	1	0	NA	1	DEG_GSE273695_Blood_Female_LPS
EPG5	1	0	NA	1	DEG_GSE273695_Brain_Male_LPS
EPHA6	1	0	NA	1	DEG_GSE273695_Brain_Male_LPS
EPHA7	1	0	NA	1	DEG_GSE189821_Female_Amy
EPHB2	1	0	NA	1	DEG_GSE273695_Brain_Male_LPS
EPHB3	1	0	NA	1	DEG_GSE189821_Female_Amy
EPHX4	1	0	NA	1	DEG_GSE189821_Female_Amy
EPM2A	1	0	NA	1	DEG_GSE273695_Brain_Male_LPS
EPM2AIP1	1	0	NA	1	DEG_GSE273695_Brain_Male_LPS
EPN1	1	0	NA	1	DEG_GSE189821_Female_Amy
EPN3	1	1	DEG_GSE235969_Male_Young_5wk	0	NA
EPOP	1	0	NA	1	DEG_GSE189821_Female_Amy
EPS15L1	1	1	DEG_GSE242892_16p11dup	0	NA
EPS8	1	0	NA	1	DEG_GSE242892_16p11dup
ERBB4	1	0	NA	1	DEG_GSE273695_Brain_Male_LPS
ERBIN	1	0	NA	1	DEG_GSE273695_Brain_Male_LPS
ERC2	1	0	NA	1	DEG_GSE189821_Female_Amy
ERH	1	1	DEG_GSE273695_Brain_Male_LPS	0	NA
ERICH1	1	0	NA	1	DEG_GSE242892_16p11dup
ERICH3	1	0	NA	1	DEG_GSE273695_Brain_Male_LPS
ERICH6	1	0	NA	1	DEG_GSE273695_Blood_Female_LPS
ERP29	1	1	DEG_GSE189821_Female_Amy	0	NA
ESRP2	1	0	NA	1	DEG_GSE189821_Female_Amy
ESRRB	1	0	NA	1	DEG_GSE189821_Female_Amy
ESRRG	1	0	NA	1	DEG_GSE273695_Brain_Male_LPS
ESYT3	1	1	DEG_GSE189821_Female_Amy	0	NA
ETNK1	1	0	NA	1	DEG_GSE273695_Brain_Male_LPS
ETNPPL	1	0	NA	1	DEG_GSE244644_FetalAorta
ETS1	1	0	NA	1	DEG_GSE242892_16p11dup
ETS2	1	0	NA	1	DEG_GSE273695_Brain_Male_LPS
EVA1B	1	0	NA	1	DEG_GSE242892_16p11dup
EXOC6B	1	0	NA	1	DEG_GSE273695_Brain_Male_LPS
EXOC7	1	0	NA	1	DEG_GSE242892_16p11dup
EXOSC2	1	1	DEG_GSE189821_Female_Amy	0	NA
EXPH5	1	0	NA	1	DEG_GSE189821_Female_Amy
EXTL1	1	0	NA	1	DEG_GSE189821_Female_Amy
F5	1	1	DEG_GSE235969_Male_Young_5wk	0	NA
FABP7	1	1	DEG_GSE189821_Female_Amy	0	NA
FAIM	1	1	DEG_GSE189821_Female_Amy	0	NA
FAM104A	1	1	DEG_GSE116813_vehicle	0	NA
FAM107A	1	0	NA	1	DEG_GSE242892_16p11dup
FAM117B	1	0	NA	1	DEG_GSE273695_Brain_Male_LPS
FAM118A	1	0	NA	1	DEG_GSE242892_16p11dup
FAM120C	1	0	NA	1	DEG_GSE273695_Brain_Male_LPS
FAM126B	1	0	NA	1	DEG_GSE273695_Brain_Male_LPS
FAM135B	1	0	NA	1	DEG_GSE273695_Brain_Male_LPS
FAM13A	1	0	NA	1	DEG_GSE273695_Brain_Male_LPS
FAM13B	1	1	DEG_GSE189821_Male_Nac	0	NA
FAM149A	1	1	DEG_GSE242892_16p11dup	0	NA
FAM161B	1	1	DEG_GSE242892_16p11dup	0	NA
FAM162A	1	1	DEG_GSE273695_Brain_Male_LPS	0	NA
FAM163B	1	1	DEG_GSE189821_Female_DMS	0	NA
FAM168A	1	0	NA	1	DEG_GSE273695_Brain_Male_LPS
FAM169A	1	0	NA	1	DEG_GSE273695_Brain_Male_LPS
FAM174A	1	1	DEG_GSE273695_Brain_Male_LPS	0	NA
FAM180A	1	0	NA	1	DEG_GSE273695_Brain_Female_LPS
FAM189A1	1	0	NA	1	DEG_GSE189821_Female_Amy
FAM193B	1	1	DEG_GSE273695_Brain_Male_LPS	0	NA
FAM210B	1	0	NA	1	DEG_GSE189821_Female_Amy
FAM217B	1	0	NA	1	DEG_GSE273695_Brain_Male_LPS
FAM219B	1	1	DEG_GSE213734_LPS	0	NA
FAM222B	1	0	NA	1	DEG_GSE189821_Female_Amy
FAM76B	1	0	NA	1	DEG_GSE116813_vehicle
FAM78A	1	0	NA	1	DEG_GSE189821_Female_Amy
FAM91A1	1	0	NA	1	DEG_GSE273695_Brain_Male_LPS
FANCL	1	1	DEG_GSE189821_Female_Amy	0	NA
FARP1	1	0	NA	1	DEG_GSE242892_16p11dup
FASTK	1	1	DEG_GSE273695_Brain_Male_LPS	0	NA
FAT1	1	0	NA	1	DEG_GSE273695_Brain_Male_LPS
FAT4	1	0	NA	1	DEG_GSE273695_Brain_Male_LPS
FAU	1	1	DEG_GSE273695_Brain_Male_LPS	0	NA
FAXC	1	0	NA	1	DEG_GSE273695_Brain_Male_LPS
FAXDC2	1	0	NA	1	DEG_GSE242892_WT
FBF1	1	0	NA	1	DEG_GSE189821_Male_Nac
FBLN1	1	0	NA	1	DEG_GSE116813_vehicle
FBXL16	1	0	NA	1	DEG_GSE189821_Female_Amy
FBXL18	1	0	NA	1	DEG_GSE273695_Brain_Male_LPS
FBXL20	1	0	NA	1	DEG_GSE273695_Brain_Male_LPS
FBXO17	1	0	NA	1	DEG_GSE242892_WT
FBXO34	1	0	NA	1	DEG_GSE189821_Female_Amy
FBXO41	1	0	NA	1	DEG_GSE273695_Brain_Male_LPS
FBXW10	1	1	DEG_GSE242892_WT	0	NA
FBXW7	1	0	NA	1	DEG_GSE189821_Female_Amy
FCHO1	1	0	NA	1	DEG_GSE189821_Male_Nac
FDFT1	1	0	NA	1	DEG_GSE242892_16p11dup
FDX2	1	1	DEG_GSE273695_Brain_Male_LPS	0	NA
FECH	1	0	NA	1	DEG_GSE273695_Blood_Female_LPS
FEM1B	1	0	NA	1	DEG_GSE273695_Brain_Male_LPS
FEZ1	1	1	DEG_GSE189821_Female_Amy	0	NA
FEZF1	1	1	DEG_GSE189821_Female_Amy	0	NA
FGD4	1	0	NA	1	DEG_GSE273695_Brain_Male_LPS
FGF1	1	1	DEG_GSE189821_Female_Amy	0	NA
FGF14	1	0	NA	1	DEG_GSE273695_Brain_Male_LPS
FGFR3	1	1	DEG_GSE116813_vehicle	0	NA
FGFRL1	1	0	NA	1	DEG_GSE189821_Male_DMS
FGR	1	0	NA	1	DEG_GSE242892_WT
FHOD3	1	1	DEG_GSE116813_vehicle	0	NA
FIS1	1	1	DEG_GSE273695_Brain_Male_LPS	0	NA
FKBP1A	1	0	NA	1	DEG_GSE189821_Male_Nac
FKBP2	1	1	DEG_GSE273695_Brain_Male_LPS	0	NA
FKBP4	1	1	DEG_GSE189821_Female_Amy	0	NA
FLNA	1	0	NA	1	DEG_GSE273695_Brain_Female_LPS
FLOT1	1	0	NA	1	DEG_GSE198578
FLT3LG	1	0	NA	1	DEG_GSE242892_WT
FMO2	1	1	DEG_GSE189821_Female_Amy	0	NA
FMOD	1	0	NA	1	DEG_GSE273695_Brain_Female_LPS
FNDC4	1	0	NA	1	DEG_GSE242892_16p11dup
FNDC9	1	1	DEG_GSE189821_Female_Amy	0	NA
FNIP2	1	0	NA	1	DEG_GSE273695_Brain_Male_LPS
FNTA	1	1	DEG_GSE189821_Female_Amy	0	NA
FOLR1	1	1	DEG_GSE235969_Male_Young_5wk	0	NA
FOS	1	1	DEG_GSE116813_vehicle	0	NA
FOSL2	1	0	NA	1	DEG_GSE213734_vehicle
FOXG1	1	0	NA	1	DEG_GSE189821_Female_Amy
FOXK1	1	0	NA	1	DEG_GSE273695_Brain_Male_LPS
FOXO1	1	0	NA	1	DEG_GSE273695_Brain_Male_LPS
FOXO3	1	0	NA	1	DEG_GSE273695_Brain_Male_LPS
FOXP4	1	0	NA	1	DEG_GSE189821_Female_Amy
FPGT	1	0	NA	1	DEG_GSE273695_Brain_Male_LPS
FREM1	1	0	NA	1	DEG_GSE189821_Female_Amy
FREM3	1	1	DEG_GSE189821_Female_Amy	0	NA
FRMPD4	1	0	NA	1	DEG_GSE273695_Brain_Male_LPS
FRRS1	1	0	NA	1	DEG_GSE189821_Female_Amy
FRRS1L	1	0	NA	1	DEG_GSE273695_Brain_Male_LPS
FRS2	1	0	NA	1	DEG_GSE273695_Brain_Male_LPS
FRYL	1	0	NA	1	DEG_GSE273695_Brain_Male_LPS
FRZB	1	0	NA	1	DEG_GSE116813_vehicle
FSCN1	1	0	NA	1	DEG_GSE189821_Female_Amy
FSTL1	1	0	NA	1	DEG_GSE189821_Female_Amy
FSTL4	1	0	NA	1	DEG_GSE189821_Female_Amy
FSTL5	1	1	DEG_GSE189821_Female_Amy	0	NA
FTH1	1	1	DEG_GSE273695_Brain_Male_LPS	0	NA
FTL	1	1	DEG_GSE273695_Brain_Male_LPS	0	NA
FUCA1	1	1	DEG_GSE189821_Female_Amy	0	NA
FUT9	1	0	NA	1	DEG_GSE273695_Brain_Male_LPS
FXYD1	1	1	DEG_GSE273695_Brain_Male_LPS	0	NA
FXYD7	1	1	DEG_GSE273695_Brain_Male_LPS	0	NA
FYB1	1	1	DEG_GSE181487	0	NA
FZD3	1	0	NA	1	DEG_GSE273695_Brain_Male_LPS
FZD5	1	0	NA	1	DEG_GSE242892_16p11dup
G3BP2	1	1	DEG_GSE242892_WT	0	NA
GABARAP	1	1	DEG_GSE273695_Brain_Male_LPS	0	NA
GABRA4	1	0	NA	1	DEG_GSE273695_Brain_Male_LPS
GABRD	1	0	NA	1	DEG_GSE189821_Female_Amy
GAD2	1	0	NA	1	DEG_GSE273695_Brain_Male_LPS
GADD45G	1	1	DEG_GSE242892_16p11dup	0	NA
GAL3ST4	1	1	DEG_GSE158188_Male	0	NA
GALE	1	1	DEG_GSE273695_Brain_Male_LPS	0	NA
GALNS	1	0	NA	1	DEG_GSE189821_Female_Amy
GALNT13	1	0	NA	1	DEG_GSE273695_Brain_Male_LPS
GALNT16	1	0	NA	1	DEG_GSE273695_Brain_Male_LPS
GAP43	1	1	DEG_GSE189821_Female_Amy	0	NA
GAPVD1	1	0	NA	1	DEG_GSE273695_Brain_Male_LPS
GAREM1	1	0	NA	1	DEG_GSE273695_Brain_Male_LPS
GATAD2B	1	0	NA	1	DEG_GSE273695_Brain_Male_LPS
GCK	1	1	DEG_GSE189821_Female_Amy	0	NA
GCNT2	1	0	NA	1	DEG_GSE189821_Female_Amy
GDA	1	0	NA	1	DEG_GSE273695_Blood_Male_Saline
GDPD2	1	1	DEG_GSE189821_Female_Amy	0	NA
GEMIN4	1	1	DEG_GSE213734_vehicle	0	NA
GFOD1	1	1	DEG_GSE244644_FetalAorta	0	NA
GGT5	1	1	DEG_GSE181487	0	NA
GH1	1	1	DEG_GSE116813_vehicle	0	NA
GIMAP7	1	1	DEG_GSE181487	0	NA
GIT1	1	0	NA	1	DEG_GSE189821_Female_Amy
GJB2	1	0	NA	1	DEG_GSE116813_vehicle
GJB6	1	0	NA	1	DEG_GSE273695_Brain_Male_Saline
GJD2	1	1	DEG_GSE189821_Female_Amy	0	NA
GKAP1	1	1	DEG_GSE189821_Female_Amy	0	NA
GLA	1	1	DEG_GSE242892_WT	0	NA
GLCCI1	1	0	NA	1	DEG_GSE189821_Female_Amy
GLDN	1	1	DEG_GSE189821_Female_Amy	0	NA
GLG1	1	0	NA	1	DEG_GSE273695_Brain_Male_LPS
GLI3	1	0	NA	1	DEG_GSE273695_Brain_Male_LPS
GLOD4	1	1	DEG_GSE189821_Female_Amy	0	NA
GLRA2	1	1	DEG_GSE189821_Female_Amy	0	NA
GLRX3	1	1	DEG_GSE189821_Female_Amy	0	NA
GLRX5	1	1	DEG_GSE273695_Brain_Male_LPS	0	NA
GNAO1	1	0	NA	1	DEG_GSE242892_WT
GNE	1	0	NA	1	DEG_GSE273695_Brain_Male_Saline
GNG11	1	1	DEG_GSE189821_Female_Amy	0	NA
GNG2	1	1	DEG_GSE189821_Male_Nac	0	NA
GNG3	1	1	DEG_GSE273695_Brain_Male_LPS	0	NA
GNG7	1	0	NA	1	DEG_GSE189821_Female_Amy
GNG8	1	1	DEG_GSE189821_Female_Amy	0	NA
GOLGB1	1	0	NA	1	DEG_GSE273695_Brain_Male_LPS
GON4L	1	0	NA	1	DEG_GSE273695_Brain_Male_LPS
GOT2	1	0	NA	1	DEG_GSE189821_Female_Amy
GPAM	1	1	DEG_GSE116813_vehicle	0	NA
GPC3	1	1	DEG_GSE189821_Female_Amy	0	NA
GPC5	1	1	DEG_GSE189821_Female_Amy	0	NA
GPC6	1	0	NA	1	DEG_GSE189821_Female_Amy
GPD2	1	0	NA	1	DEG_GSE273695_Brain_Male_LPS
GPKOW	1	1	DEG_GSE116813_vehicle	0	NA
GPM6A	1	1	DEG_GSE242892_16p11dup	0	NA
GPN1	1	1	DEG_GSE189821_Female_Amy	0	NA
GPR101	1	1	DEG_GSE189821_Female_Amy	0	NA
GPR137	1	1	DEG_GSE273695_Brain_Male_LPS	0	NA
GPR158	1	0	NA	1	DEG_GSE273695_Brain_Male_LPS
GPR21	1	0	NA	1	DEG_GSE189821_Female_Amy
GPR22	1	0	NA	1	DEG_GSE189821_Female_Amy
GPR26	1	0	NA	1	DEG_GSE273695_Brain_Male_LPS
GPR50	1	1	DEG_GSE189821_Female_Amy	0	NA
GPR52	1	0	NA	1	DEG_GSE189821_Female_Amy
GPR83	1	0	NA	1	DEG_GSE189821_Female_Amy
GPR89B	1	1	DEG_GSE242892_WT	0	NA
GPRASP1	1	1	DEG_GSE189821_Female_Amy	0	NA
GPRASP2	1	1	DEG_GSE116813_vehicle	0	NA
GPRIN3	1	0	NA	1	DEG_GSE273695_Brain_Male_LPS
GPSM1	1	0	NA	1	DEG_GSE242892_16p11dup
GPX3	1	1	DEG_GSE189821_Female_Amy	0	NA
GPX4	1	1	DEG_GSE273695_Brain_Male_LPS	0	NA
GREB1	1	1	DEG_GSE158188_Male	0	NA
GRIA2	1	0	NA	1	DEG_GSE273695_Brain_Male_LPS
GRIA3	1	0	NA	1	DEG_GSE189821_Female_Amy
GRID1	1	0	NA	1	DEG_GSE189821_Male_Nac
GRIK1	1	1	DEG_GSE189821_Female_Amy	0	NA
GRIK3	1	0	NA	1	DEG_GSE273695_Brain_Male_LPS
GRIN2B	1	0	NA	1	DEG_GSE189821_Female_Amy
GRIN2C	1	0	NA	1	DEG_GSE189821_Female_Amy
GRIN3A	1	0	NA	1	DEG_GSE273695_Brain_Male_LPS
GRK3	1	0	NA	1	DEG_GSE273695_Brain_Male_LPS
GRM1	1	0	NA	1	DEG_GSE273695_Brain_Male_LPS
GRM3	1	0	NA	1	DEG_GSE273695_Brain_Male_LPS
GRM4	1	0	NA	1	DEG_GSE189821_Male_Nac
GRM5	1	0	NA	1	DEG_GSE273695_Brain_Male_LPS
GRM8	1	1	DEG_GSE189821_Female_DMS	0	NA
GRSF1	1	1	DEG_GSE189821_Male_Nac	0	NA
GSDMA	1	1	DEG_GSE273695_Brain_Male_LPS	0	NA
GSK3B	1	0	NA	1	DEG_GSE273695_Brain_Male_LPS
GSTP1	1	1	DEG_GSE189821_Female_Amy	0	NA
GTF3C4	1	0	NA	1	DEG_GSE273695_Brain_Male_LPS
GTPBP1	1	0	NA	1	DEG_GSE189821_Female_Amy
GTPBP6	1	1	DEG_GSE273695_Brain_Male_LPS	0	NA
GUCY1B1	1	1	DEG_GSE158188_Female	0	NA
GUCY2F	1	0	NA	1	DEG_GSE242892_16p11dup
GUK1	1	1	DEG_GSE273695_Brain_Male_LPS	0	NA
H1F0	1	1	DEG_GSE242892_16p11dup	0	NA
H3F3B	1	1	DEG_GSE189821_Female_Amy	0	NA
HAGH	1	0	NA	1	DEG_GSE273695_Blood_Female_LPS
HAP1	1	1	DEG_GSE189821_Female_Amy	0	NA
HAPLN2	1	0	NA	1	DEG_GSE235969_Female_Old_5d
HAPLN4	1	0	NA	1	DEG_GSE189821_Female_Amy
HARS	1	0	NA	1	DEG_GSE242892_WT
HAS1	1	0	NA	1	DEG_GSE244644_FetalAorta
HAUS4	1	1	DEG_GSE189821_Female_Amy	0	NA
HAUS7	1	1	DEG_GSE189821_Female_Amy	0	NA
HCFC1R1	1	1	DEG_GSE273695_Brain_Male_LPS	0	NA
HCN1	1	0	NA	1	DEG_GSE273695_Brain_Male_LPS
HCN3	1	1	DEG_GSE189821_Female_VTA	0	NA
HCRTR2	1	1	DEG_GSE189821_Female_Amy	0	NA
HCST	1	1	DEG_GSE181487	0	NA
HDAC11	1	1	DEG_GSE189821_Female_Amy	0	NA
HDAC4	1	0	NA	1	DEG_GSE273695_Brain_Male_LPS
HDAC5	1	1	DEG_GSE116813_vehicle	0	NA
HDAC9	1	0	NA	1	DEG_GSE273695_Brain_Male_LPS
HDC	1	0	NA	1	DEG_GSE273695_Blood_Male_LPS
HEATR5B	1	0	NA	1	DEG_GSE273695_Brain_Male_LPS
HECTD1	1	0	NA	1	DEG_GSE273695_Brain_Male_LPS
HECTD4	1	0	NA	1	DEG_GSE273695_Brain_Male_LPS
HECW1	1	0	NA	1	DEG_GSE273695_Brain_Male_LPS
HECW2	1	0	NA	1	DEG_GSE273695_Brain_Male_LPS
HENMT1	1	0	NA	1	DEG_GSE189821_Female_Amy
HERC1	1	0	NA	1	DEG_GSE273695_Brain_Male_LPS
HERC2	1	0	NA	1	DEG_GSE273695_Brain_Male_LPS
HERC3	1	0	NA	1	DEG_GSE244644_UmbilicalVein
HES2	1	1	DEG_GSE216112	0	NA
HES5	1	1	DEG_GSE189821_Female_Amy	0	NA
HEXIM2	1	1	DEG_GSE189821_Female_Amy	0	NA
HEY1	1	0	NA	1	DEG_GSE189821_Female_Amy
HGF	1	0	NA	1	DEG_GSE189821_Female_Amy
HINT2	1	1	DEG_GSE273695_Brain_Male_LPS	0	NA
HIPK2	1	0	NA	1	DEG_GSE273695_Brain_Male_LPS
HIPK3	1	0	NA	1	DEG_GSE273695_Brain_Male_LPS
HIVEP3	1	0	NA	1	DEG_GSE189821_Male_Nac
HK1	1	0	NA	1	DEG_GSE189821_Female_Amy
HLA-DOA	1	1	DEG_GSE244644_UmbilicalVein	0	NA
HLA-DQA1	1	1	DEG_GSE242892_16p11dup	0	NA
HMBOX1	1	1	DEG_GSE189821_Male_Nac	0	NA
HMGN3	1	1	DEG_GSE273695_Brain_Male_LPS	0	NA
HNRNPH3	1	1	DEG_GSE189821_Female_Amy	0	NA
HNRNPL	1	0	NA	1	DEG_GSE189821_Male_Nac
HNRNPLL	1	0	NA	1	DEG_GSE189821_Female_Amy
HOMER1	1	0	NA	1	DEG_GSE189821_Female_Amy
HOPX	1	1	DEG_GSE116813_vehicle	0	NA
HPCA	1	0	NA	1	DEG_GSE189821_Female_Amy
HRH3	1	0	NA	1	DEG_GSE189821_Female_Amy
HS3ST2	1	0	NA	1	DEG_GSE189821_Female_Amy
HSBP1L1	1	1	DEG_GSE181487	0	NA
HSD17B7	1	0	NA	1	DEG_GSE189821_Female_Amy
HSDL2	1	1	DEG_GSE242892_16p11dup	0	NA
HSP90AA1	1	1	DEG_GSE189821_Male_Nac	0	NA
HSPB1	1	1	DEG_GSE273695_Brain_Male_LPS	0	NA
HSPE1	1	1	DEG_GSE273695_Brain_Male_LPS	0	NA
HSPG2	1	0	NA	1	DEG_GSE116813_vehicle
HTR1A	1	0	NA	1	DEG_GSE273695_Brain_Male_LPS
HTR5A	1	0	NA	1	DEG_GSE273695_Brain_Male_LPS
HTR6	1	0	NA	1	DEG_GSE189821_Female_Amy
HTR7	1	1	DEG_GSE189821_Female_Amy	0	NA
HTT	1	0	NA	1	DEG_GSE273695_Brain_Male_LPS
HUS1	1	0	NA	1	DEG_GSE273695_Brain_Male_LPS
HYAL1	1	0	NA	1	DEG_GSE240225_THC
IBA57	1	1	DEG_GSE242892_16p11dup	0	NA
ICAM5	1	0	NA	1	DEG_GSE189821_Female_Amy
ID1	1	1	DEG_GSE273695_Brain_Male_LPS	0	NA
IDI1	1	1	DEG_GSE273695_Brain_Male_LPS	0	NA
IDO1	1	0	NA	1	DEG_GSE189821_Female_Amy
IER2	1	0	NA	1	DEG_GSE213734_vehicle
IER3IP1	1	1	DEG_GSE189821_Female_Amy	0	NA
IFFO1	1	1	DEG_GSE273695_Brain_Male_LPS	0	NA
IFIT1	1	0	NA	1	DEG_GSE273695_Blood_Female_LPS
IFIT1B	1	1	DEG_GSE189821_Female_Amy	0	NA
IFRD2	1	1	DEG_GSE189821_Female_Amy	0	NA
IFT20	1	1	DEG_GSE273695_Brain_Male_LPS	0	NA
IFT88	1	1	DEG_GSE242892_16p11dup	0	NA
IGF2	1	0	NA	1	DEG_GSE116813_vehicle
IGF2BP2	1	0	NA	1	DEG_GSE189821_Female_Amy
IGF2R	1	0	NA	1	DEG_GSE273695_Brain_Male_LPS
IGKC	1	1	DEG_GSE181487	0	NA
IK	1	1	DEG_GSE189821_Female_Amy	0	NA
IKZF2	1	1	DEG_GSE242892_WT	0	NA
IL13RA1	1	1	DEG_GSE189821_Female_Amy	0	NA
IL17RA	1	0	NA	1	DEG_GSE273695_Brain_Female_LPS
ILDR2	1	0	NA	1	DEG_GSE273695_Brain_Male_LPS
ILRUN	1	0	NA	1	DEG_GSE189821_Female_Amy
INF2	1	0	NA	1	DEG_GSE189821_Female_Amy
ING1	1	1	DEG_GSE189821_Female_Amy	0	NA
INKA2	1	0	NA	1	DEG_GSE189821_Female_Amy
INSM1	1	0	NA	1	DEG_GSE189821_Female_Amy
INSR	1	0	NA	1	DEG_GSE273695_Brain_Male_LPS
INSYN1	1	0	NA	1	DEG_GSE189821_Female_Amy
INTS10	1	0	NA	1	DEG_GSE189821_Female_Amy
INTS7	1	0	NA	1	DEG_GSE189821_Female_Amy
IPCEF1	1	0	NA	1	DEG_GSE189821_Female_Amy
IQCG	1	0	NA	1	DEG_GSE242892_16p11dup
IRF2BP2	1	1	DEG_GSE273695_Brain_Male_LPS	0	NA
IRF2BPL	1	1	DEG_GSE242892_WT	0	NA
IRF3	1	1	DEG_GSE189821_Female_Amy	0	NA
IRF6	1	0	NA	1	DEG_GSE244644_UmbilicalVein
IRF8	1	1	DEG_GSE116813_vehicle	0	NA
IRS4	1	1	DEG_GSE189821_Female_Amy	0	NA
IRX1	1	1	DEG_GSE189821_Female_Amy	0	NA
ITFG1	1	1	DEG_GSE242892_WT	0	NA
ITGA10	1	0	NA	1	DEG_GSE116813_vehicle
ITGA5	1	0	NA	1	DEG_GSE189821_Female_Amy
ITGA9	1	0	NA	1	DEG_GSE189821_Female_Amy
ITIH3	1	1	DEG_GSE189821_Female_Amy	0	NA
ITPKA	1	0	NA	1	DEG_GSE189821_Female_Amy
ITPR2	1	1	DEG_GSE116813_vehicle	0	NA
ITPRID1	1	0	NA	1	DEG_GSE189821_Female_Amy
ITSN1	1	0	NA	1	DEG_GSE273695_Blood_Female_LPS
ITSN2	1	0	NA	1	DEG_GSE273695_Brain_Male_LPS
JCAD	1	0	NA	1	DEG_GSE189821_Female_Amy
JMY	1	0	NA	1	DEG_GSE273695_Brain_Male_LPS
JPH3	1	0	NA	1	DEG_GSE189821_Female_Amy
JUN	1	1	DEG_GSE273695_Brain_Male_LPS	0	NA
JUNB	1	0	NA	1	DEG_GSE189821_Male_Nac
JUND	1	1	DEG_GSE273695_Brain_Male_LPS	0	NA
KANK1	1	1	DEG_GSE273695_Brain_Male_LPS	0	NA
KATNAL1	1	0	NA	1	DEG_GSE273695_Brain_Male_LPS
KCNA1	1	0	NA	1	DEG_GSE273695_Brain_Male_LPS
KCNA2	1	0	NA	1	DEG_GSE273695_Brain_Male_LPS
KCNA4	1	0	NA	1	DEG_GSE189821_Female_Amy
KCNE2	1	1	DEG_GSE235969_Male_Young_5wk	0	NA
KCNE5	1	1	DEG_GSE189821_Female_Amy	0	NA
KCNG1	1	0	NA	1	DEG_GSE189821_Female_Amy
KCNH1	1	0	NA	1	DEG_GSE189821_Female_Amy
KCNH3	1	0	NA	1	DEG_GSE189821_Female_Amy
KCNH5	1	0	NA	1	DEG_GSE273695_Brain_Male_LPS
KCNH7	1	0	NA	1	DEG_GSE273695_Brain_Male_LPS
KCNIP1	1	1	DEG_GSE189821_Female_Amy	0	NA
KCNIP2	1	1	DEG_GSE242892_16p11dup	0	NA
KCNJ13	1	1	DEG_GSE235969_Male_Young_5wk	0	NA
KCNJ3	1	0	NA	1	DEG_GSE273695_Brain_Male_LPS
KCNJ4	1	0	NA	1	DEG_GSE189821_Female_Amy
KCNK13	1	1	DEG_GSE189821_Female_Amy	0	NA
KCNMA1	1	0	NA	1	DEG_GSE273695_Brain_Male_LPS
KCNMB1	1	1	DEG_GSE244644_FetalAorta	0	NA
KCNN2	1	0	NA	1	DEG_GSE189821_Female_Amy
KCNQ3	1	0	NA	1	DEG_GSE273695_Brain_Male_LPS
KCNT2	1	0	NA	1	DEG_GSE273695_Brain_Male_LPS
KCNV1	1	0	NA	1	DEG_GSE189821_Female_Amy
KCTD1	1	0	NA	1	DEG_GSE189821_Female_Amy
KCTD12	1	0	NA	1	DEG_GSE189821_Female_Amy
KCTD17	1	1	DEG_GSE189821_Female_DMS	0	NA
KCTD4	1	0	NA	1	DEG_GSE189821_Female_DMS
KDM4A	1	0	NA	1	DEG_GSE189821_Male_Nac
KDM7A	1	0	NA	1	DEG_GSE273695_Brain_Male_LPS
KHDRBS2	1	0	NA	1	DEG_GSE189821_Female_DMS
KIAA0040	1	0	NA	1	DEG_GSE189821_Female_Amy
KIAA0100	1	0	NA	1	DEG_GSE273695_Brain_Male_LPS
KIAA0319	1	0	NA	1	DEG_GSE273695_Brain_Male_LPS
KIAA0753	1	1	DEG_GSE242892_WT	0	NA
KIAA1109	1	0	NA	1	DEG_GSE273695_Brain_Male_LPS
KIAA1522	1	0	NA	1	DEG_GSE244644_FetalAorta
KIAA1549	1	0	NA	1	DEG_GSE273695_Brain_Male_LPS
KIAA1549L	1	0	NA	1	DEG_GSE189821_Female_Amy
KIDINS220	1	0	NA	1	DEG_GSE273695_Brain_Male_LPS
KIF15	1	0	NA	1	DEG_GSE242892_16p11dup
KIF1A	1	0	NA	1	DEG_GSE273695_Brain_Male_LPS
KIF1C	1	1	DEG_GSE189821_Female_DMS	0	NA
KIF21B	1	0	NA	1	DEG_GSE273695_Brain_Male_LPS
KIF3A	1	0	NA	1	DEG_GSE273695_Brain_Male_LPS
KIF5C	1	0	NA	1	DEG_GSE273695_Brain_Male_LPS
KIFC2	1	1	DEG_GSE213734_vehicle	0	NA
KIFC3	1	0	NA	1	DEG_GSE242892_WT
KIR3DL3	1	1	DEG_GSE189821_Female_Amy	0	NA
KISS1R	1	0	NA	1	DEG_GSE242892_16p11dup
KIT	1	0	NA	1	DEG_GSE273695_Brain_Male_LPS
KLF10	1	1	DEG_GSE273695_Brain_Male_LPS	0	NA
KLF12	1	0	NA	1	DEG_GSE273695_Brain_Male_LPS
KLF13	1	0	NA	1	DEG_GSE189821_Female_Amy
KLF5	1	0	NA	1	DEG_GSE189821_Female_Amy
KLF9	1	0	NA	1	DEG_GSE189821_Female_Amy
KLHDC10	1	0	NA	1	DEG_GSE273695_Brain_Male_LPS
KLHDC3	1	1	DEG_GSE116813_vehicle	0	NA
KLHL24	1	0	NA	1	DEG_GSE273695_Brain_Male_LPS
KLHL25	1	0	NA	1	DEG_GSE242892_16p11dup
KLHL28	1	0	NA	1	DEG_GSE273695_Brain_Male_LPS
KLHL29	1	0	NA	1	DEG_GSE189821_Female_Amy
KLHL3	1	0	NA	1	DEG_GSE189821_Female_Amy
KLHL36	1	0	NA	1	DEG_GSE242892_16p11dup
KLK6	1	1	DEG_GSE181487	0	NA
KMT2A	1	0	NA	1	DEG_GSE273695_Brain_Male_LPS
KMT2C	1	0	NA	1	DEG_GSE273695_Brain_Male_LPS
KREMEN1	1	0	NA	1	DEG_GSE189821_Female_Amy
KRT1	1	1	DEG_GSE189821_Female_Amy	0	NA
KRT18	1	1	DEG_GSE235969_Male_Young_5wk	0	NA
KRTCAP2	1	1	DEG_GSE273695_Brain_Male_LPS	0	NA
KSR2	1	0	NA	1	DEG_GSE273695_Brain_Male_LPS
LACTB2	1	0	NA	1	DEG_GSE242892_WT
LAMA3	1	1	DEG_GSE116813_vehicle	0	NA
LAMB1	1	0	NA	1	DEG_GSE189821_Female_Amy
LAMC2	1	1	DEG_GSE116813_vehicle	0	NA
LAMTOR1	1	1	DEG_GSE242892_16p11dup	0	NA
LAMTOR2	1	1	DEG_GSE273695_Brain_Male_LPS	0	NA
LAMTOR4	1	1	DEG_GSE273695_Brain_Male_LPS	0	NA
LARGE1	1	0	NA	1	DEG_GSE189821_Female_Amy
LARS2	1	0	NA	1	DEG_GSE226955_ESC
LBH	1	1	DEG_GSE189821_Female_Amy	0	NA
LBHD2	1	1	DEG_GSE189821_Female_Amy	0	NA
LBP	1	1	DEG_GSE235969_Male_Young_5wk	0	NA
LCK	1	1	DEG_GSE181487	0	NA
LCLAT1	1	1	DEG_GSE189821_Female_DMS	0	NA
LCOR	1	0	NA	1	DEG_GSE273695_Brain_Male_LPS
LCORL	1	0	NA	1	DEG_GSE273695_Brain_Male_LPS
LCT	1	0	NA	1	DEG_GSE244644_FetalAorta
LDB2	1	0	NA	1	DEG_GSE189821_Female_Amy
LEPR	1	0	NA	1	DEG_GSE116813_vehicle
LEPROT	1	1	DEG_GSE189821_Female_Amy	0	NA
LGI1	1	0	NA	1	DEG_GSE189821_Female_Amy
LGI2	1	0	NA	1	DEG_GSE273695_Brain_Male_LPS
LHX5	1	1	DEG_GSE189821_Female_Amy	0	NA
LHX6	1	1	DEG_GSE189821_Female_Amy	0	NA
LIG1	1	1	DEG_GSE189821_Female_Amy	0	NA
LIMCH1	1	0	NA	1	DEG_GSE273695_Brain_Male_LPS
LIN37	1	0	NA	1	DEG_GSE242892_WT
LIN7A	1	0	NA	1	DEG_GSE273695_Brain_Male_LPS
LIN7B	1	1	DEG_GSE273695_Brain_Male_LPS	0	NA
LINGO1	1	0	NA	1	DEG_GSE189821_Female_Amy
LIPG	1	0	NA	1	DEG_GSE189821_Female_Amy
LMBRD2	1	0	NA	1	DEG_GSE273695_Brain_Male_LPS
LMO3	1	0	NA	1	DEG_GSE189821_Female_Amy
LMO4	1	0	NA	1	DEG_GSE189821_Female_Amy
LMO7	1	0	NA	1	DEG_GSE189821_Female_Amy
LMTK2	1	0	NA	1	DEG_GSE189821_Female_Amy
LNPEP	1	1	DEG_GSE242892_16p11dup	0	NA
LNX2	1	0	NA	1	DEG_GSE189821_Female_Amy
LOC728392	1	1	DEG_GSE189821_Female_Amy	0	NA
LONRF2	1	0	NA	1	DEG_GSE273695_Brain_Male_LPS
LPAR2	1	1	DEG_GSE189821_Female_Amy	0	NA
LPIN1	1	0	NA	1	DEG_GSE273695_Brain_Male_LPS
LPO	1	0	NA	1	DEG_GSE189821_Female_Amy
LRFN1	1	0	NA	1	DEG_GSE189821_Female_Amy
LRFN5	1	1	DEG_GSE189821_Male_Nac	0	NA
LRIG1	1	1	DEG_GSE189821_Female_Amy	0	NA
LRIG2	1	0	NA	1	DEG_GSE273695_Brain_Male_LPS
LRP1	1	0	NA	1	DEG_GSE273695_Brain_Male_LPS
LRP11	1	0	NA	1	DEG_GSE189821_Female_Amy
LRP6	1	0	NA	1	DEG_GSE273695_Brain_Male_LPS
LRP8	1	0	NA	1	DEG_GSE273695_Brain_Male_LPS
LRRC4C	1	0	NA	1	DEG_GSE189821_Female_Amy
LRRC58	1	0	NA	1	DEG_GSE273695_Brain_Male_LPS
LRRC73	1	1	DEG_GSE273695_Brain_Male_LPS	0	NA
LRRC75A	1	0	NA	1	DEG_GSE242892_16p11dup
LRRC8A	1	0	NA	1	DEG_GSE273695_Brain_Male_LPS
LRRC8B	1	0	NA	1	DEG_GSE189821_Female_Amy
LRRK2	1	0	NA	1	DEG_GSE189821_Female_Amy
LRRTM2	1	0	NA	1	DEG_GSE273695_Brain_Male_LPS
LRTOMT	1	1	DEG_GSE242892_16p11dup	0	NA
LSAMP	1	0	NA	1	DEG_GSE273695_Brain_Male_LPS
LSM11	1	0	NA	1	DEG_GSE189821_Female_Amy
LSM2	1	1	DEG_GSE273695_Brain_Male_LPS	0	NA
LSM5	1	1	DEG_GSE189821_Female_Amy	0	NA
LTBP2	1	0	NA	1	DEG_GSE213734_vehicle
LTBP3	1	0	NA	1	DEG_GSE242892_16p11dup
LUC7L3	1	1	DEG_GSE189821_Female_Amy	0	NA
LUZP1	1	1	DEG_GSE189821_Female_DMS	0	NA
LY6G6C	1	1	DEG_GSE273695_Blood_Male_Saline	0	NA
LY9	1	1	DEG_GSE242892_16p11dup	0	NA
LYPD1	1	0	NA	1	DEG_GSE189821_Female_DMS
LYZ	1	1	DEG_GSE273695_Brain_Male_LPS	0	NA
LZTS1	1	0	NA	1	DEG_GSE189821_Female_Amy
LZTS3	1	0	NA	1	DEG_GSE189821_Female_Amy
MAB21L1	1	1	DEG_GSE189821_Female_Amy	0	NA
MAFA	1	0	NA	1	DEG_GSE189821_Female_Amy
MAGED2	1	1	DEG_GSE189821_Female_Amy	0	NA
MAGEE2	1	1	DEG_GSE189821_Female_Amy	0	NA
MAGEL2	1	1	DEG_GSE189821_Female_Amy	0	NA
MAL2	1	0	NA	1	DEG_GSE189821_Female_Amy
MAML3	1	0	NA	1	DEG_GSE189821_Female_Amy
MAMLD1	1	0	NA	1	DEG_GSE189821_Female_Amy
MAN1A1	1	0	NA	1	DEG_GSE189821_Female_Amy
MAN1A2	1	0	NA	1	DEG_GSE273695_Brain_Male_LPS
MAN2A1	1	0	NA	1	DEG_GSE189821_Female_Amy
MANSC1	1	0	NA	1	DEG_GSE189821_Female_Amy
MAOA	1	1	DEG_GSE189821_Female_Amy	0	NA
MAP1B	1	0	NA	1	DEG_GSE273695_Brain_Male_LPS
MAP1LC3A	1	1	DEG_GSE273695_Brain_Male_LPS	0	NA
MAP2	1	0	NA	1	DEG_GSE273695_Brain_Male_LPS
MAP2K4	1	1	DEG_GSE189821_Male_Nac	0	NA
MAP2K6	1	0	NA	1	DEG_GSE189821_Female_Amy
MAP3K21	1	0	NA	1	DEG_GSE189821_Female_Amy
MAP3K5	1	0	NA	1	DEG_GSE189821_Female_Amy
MAP3K8	1	0	NA	1	DEG_GSE244644_FetalAorta
MAP3K9	1	0	NA	1	DEG_GSE273695_Brain_Male_LPS
MAP7D2	1	1	DEG_GSE189821_Male_Nac	0	NA
MAPK10	1	0	NA	1	DEG_GSE273695_Brain_Male_LPS
MAPK14	1	0	NA	1	DEG_GSE189821_Male_Nac
MAPK15	1	0	NA	1	DEG_GSE273695_Blood_Male_Saline
MAPK3	1	0	NA	1	DEG_GSE116813_vehicle
MAPK4	1	0	NA	1	DEG_GSE189821_Female_Amy
MAPK9	1	0	NA	1	DEG_GSE273695_Brain_Male_LPS
MAPKBP1	1	0	NA	1	DEG_GSE273695_Brain_Male_LPS
MAS1	1	0	NA	1	DEG_GSE189821_Female_Amy
MASP2	1	1	DEG_GSE242892_16p11dup	0	NA
MAST3	1	0	NA	1	DEG_GSE189821_Female_Amy
MAT2A	1	1	DEG_GSE189821_Female_Amy	0	NA
MAT2B	1	1	DEG_GSE158188_Female	0	NA
MATK	1	1	DEG_GSE273695_Brain_Male_LPS	0	NA
MATN2	1	0	NA	1	DEG_GSE189821_Female_Amy
MB21D2	1	1	DEG_GSE242892_WT	0	NA
MBLAC2	1	1	DEG_GSE189821_Female_Amy	0	NA
MBTD1	1	0	NA	1	DEG_GSE273695_Brain_Male_LPS
MC4R	1	1	DEG_GSE189821_Female_Amy	0	NA
MCM10	1	1	DEG_GSE213734_vehicle	0	NA
MCM7	1	1	DEG_GSE158188_Male	0	NA
MDM4	1	0	NA	1	DEG_GSE273695_Brain_Male_LPS
ME2	1	1	DEG_GSE189821_Female_DMS	0	NA
ME3	1	0	NA	1	DEG_GSE189821_Female_Amy
MEA1	1	1	DEG_GSE273695_Brain_Male_LPS	0	NA
MECP2	1	0	NA	1	DEG_GSE273695_Brain_Male_LPS
MED10	1	1	DEG_GSE273695_Brain_Male_LPS	0	NA
MED12L	1	0	NA	1	DEG_GSE273695_Brain_Male_LPS
MED13	1	0	NA	1	DEG_GSE273695_Brain_Male_LPS
MED13L	1	0	NA	1	DEG_GSE273695_Brain_Male_LPS
MED20	1	1	DEG_GSE189821_Female_Amy	0	NA
MED29	1	1	DEG_GSE242892_16p11dup	0	NA
MEF2A	1	0	NA	1	DEG_GSE273695_Brain_Male_LPS
MEF2D	1	0	NA	1	DEG_GSE189821_Female_Amy
MEGF9	1	0	NA	1	DEG_GSE273695_Brain_Male_LPS
MEI1	1	0	NA	1	DEG_GSE189821_Female_Amy
MERTK	1	0	NA	1	DEG_GSE189821_Female_Amy
MEST	1	0	NA	1	DEG_GSE189821_Female_Amy
MET	1	1	DEG_GSE189821_Female_Amy	0	NA
METAP2	1	1	DEG_GSE189821_Female_Amy	0	NA
METTL27	1	0	NA	1	DEG_GSE189821_Female_Amy
MFAP1	1	1	DEG_GSE189821_Female_Amy	0	NA
MFAP3L	1	0	NA	1	DEG_GSE189821_Female_Amy
MFRP	1	1	DEG_GSE235969_Male_Young_5wk	0	NA
MFSD12	1	0	NA	1	DEG_GSE273695_Brain_Male_LPS
MFSD9	1	0	NA	1	DEG_GSE242892_WT
MGA	1	0	NA	1	DEG_GSE273695_Brain_Male_LPS
MGAT4B	1	0	NA	1	DEG_GSE189821_Male_Nac
MGST1	1	1	DEG_GSE189821_Female_Amy	0	NA
MICOS10-NBL1	1	0	NA	1	DEG_GSE116813_vehicle
MID2	1	0	NA	1	DEG_GSE273695_Brain_Male_LPS
MIEN1	1	1	DEG_GSE273695_Brain_Male_LPS	0	NA
MIF	1	1	DEG_GSE273695_Brain_Male_LPS	0	NA
MIGA1	1	0	NA	1	DEG_GSE273695_Brain_Male_LPS
MINAR1	1	0	NA	1	DEG_GSE244644_FetalAorta
MINAR2	1	1	DEG_GSE189821_Female_Amy	0	NA
MINDY2	1	0	NA	1	DEG_GSE244644_FetalAorta
MINK1	1	0	NA	1	DEG_GSE189821_Female_Amy
MIS18A	1	0	NA	1	DEG_GSE273695_Brain_Female_LPS
MLC1	1	1	DEG_GSE189821_Female_Amy	0	NA
MLLT3	1	0	NA	1	DEG_GSE189821_Female_Amy
MLST8	1	0	NA	1	DEG_GSE242892_16p11dup
MMD	1	0	NA	1	DEG_GSE189821_Female_Amy
MMD2	1	1	DEG_GSE189821_Female_Amy	0	NA
MMP16	1	0	NA	1	DEG_GSE273695_Brain_Male_LPS
MMRN1	1	1	DEG_GSE244644_UmbilicalVein	0	NA
MN1	1	1	DEG_GSE189821_Female_DMS	0	NA
MOB1B	1	0	NA	1	DEG_GSE273695_Brain_Male_LPS
MOBP	1	0	NA	1	DEG_GSE273695_Blood_Female_Saline
MON2	1	0	NA	1	DEG_GSE273695_Brain_Male_LPS
MPC2	1	1	DEG_GSE273695_Brain_Male_LPS	0	NA
MPEG1	1	1	DEG_GSE158188_Male	0	NA
MPHOSPH10	1	1	DEG_GSE242892_WT	0	NA
MPHOSPH6	1	0	NA	1	DEG_GSE242892_16p11dup
MPND	1	1	DEG_GSE273695_Brain_Male_LPS	0	NA
MPRIP	1	0	NA	1	DEG_GSE189821_Female_Amy
MPV17	1	0	NA	1	DEG_GSE242892_WT
MPZ	1	0	NA	1	DEG_GSE213734_vehicle
MPZL1	1	1	DEG_GSE116813_vehicle	0	NA
MRAP2	1	1	DEG_GSE189821_Female_Amy	0	NA
MRC1	1	0	NA	1	DEG_GSE273695_Brain_Female_LPS
MRC2	1	0	NA	1	DEG_GSE116813_vehicle
MRGBP	1	1	DEG_GSE189821_Female_Amy	0	NA
MROH2A	1	0	NA	1	DEG_GSE242892_WT
MRPL13	1	1	DEG_GSE273695_Brain_Male_LPS	0	NA
MRPL2	1	1	DEG_GSE273695_Brain_Male_LPS	0	NA
MRPL20	1	1	DEG_GSE273695_Brain_Male_LPS	0	NA
MRPL23	1	1	DEG_GSE273695_Brain_Male_LPS	0	NA
MRPL33	1	1	DEG_GSE189821_Female_Amy	0	NA
MRPL46	1	1	DEG_GSE189821_Female_Amy	0	NA
MRPL54	1	1	DEG_GSE273695_Brain_Male_LPS	0	NA
MRPL55	1	1	DEG_GSE273695_Brain_Male_LPS	0	NA
MRPL9	1	1	DEG_GSE189821_Female_Amy	0	NA
MRPS25	1	1	DEG_GSE273695_Brain_Male_LPS	0	NA
MRPS26	1	1	DEG_GSE273695_Brain_Male_LPS	0	NA
MRPS7	1	1	DEG_GSE189821_Female_Amy	0	NA
MRS2	1	0	NA	1	DEG_GSE242892_16p11dup
MRTFA	1	0	NA	1	DEG_GSE189821_Male_Nac
MSI1	1	1	DEG_GSE273695_Brain_Male_LPS	0	NA
MSRA	1	1	DEG_GSE242892_16p11dup	0	NA
MT3	1	1	DEG_GSE273695_Brain_Male_LPS	0	NA
MTBP	1	0	NA	1	DEG_GSE213734_vehicle
MTCP1	1	0	NA	1	DEG_GSE213734_vehicle
MTHFD1L	1	0	NA	1	DEG_GSE273695_Brain_Male_Saline
MTHFD2L	1	1	DEG_GSE189821_Female_Amy	0	NA
MTIF3	1	1	DEG_GSE242892_16p11dup	0	NA
MTMR12	1	0	NA	1	DEG_GSE189821_Female_Amy
MTMR9	1	0	NA	1	DEG_GSE273695_Brain_Male_LPS
MTPN	1	0	NA	1	DEG_GSE189821_Female_Amy
MTR	1	0	NA	1	DEG_GSE273695_Brain_Male_LPS
MTRNR2L7	1	1	DEG_GSE235969_Female_Old_5d	0	NA
MTSS1	1	0	NA	1	DEG_GSE242892_WT
MTTP	1	1	DEG_GSE189821_Female_Amy	0	NA
MTURN	1	0	NA	1	DEG_GSE273695_Brain_Male_LPS
MTUS2	1	0	NA	1	DEG_GSE242892_16p11dup
MTX2	1	1	DEG_GSE273695_Brain_Male_LPS	0	NA
MUL1	1	0	NA	1	DEG_GSE273695_Brain_Male_LPS
MYADM	1	0	NA	1	DEG_GSE189821_Female_Amy
MYCBP2	1	0	NA	1	DEG_GSE273695_Brain_Male_LPS
MYDGF	1	1	DEG_GSE273695_Brain_Male_LPS	0	NA
MYH7B	1	1	DEG_GSE189821_Female_Amy	0	NA
MYL12A	1	1	DEG_GSE273695_Brain_Male_LPS	0	NA
MYL6	1	1	DEG_GSE273695_Brain_Male_LPS	0	NA
MYLIP	1	0	NA	1	DEG_GSE189821_Female_Amy
MYO16	1	1	DEG_GSE273695_Brain_Male_Saline	0	NA
MYO19	1	0	NA	1	DEG_GSE242892_16p11dup
MYO1C	1	0	NA	1	DEG_GSE242892_16p11dup
MYO6	1	1	DEG_GSE189821_Female_VTA	0	NA
MYO9A	1	0	NA	1	DEG_GSE273695_Brain_Male_LPS
MYOF	1	0	NA	1	DEG_GSE116813_vehicle
MYRIP	1	0	NA	1	DEG_GSE189821_Female_Amy
MYT1L	1	0	NA	1	DEG_GSE273695_Brain_Male_LPS
NAB2	1	1	DEG_GSE273695_Brain_Male_LPS	0	NA
NAF1	1	0	NA	1	DEG_GSE242892_16p11dup
NALCN	1	0	NA	1	DEG_GSE273695_Brain_Male_LPS
NAP1L2	1	1	DEG_GSE244644_FetalAorta	0	NA
NAP1L4	1	1	DEG_GSE189821_Female_Amy	0	NA
NAP1L5	1	1	DEG_GSE189821_Female_Amy	0	NA
NAPB	1	0	NA	1	DEG_GSE273695_Brain_Male_LPS
NAV1	1	0	NA	1	DEG_GSE273695_Brain_Male_LPS
NAXD	1	1	DEG_GSE189821_Female_Amy	0	NA
NCAM2	1	0	NA	1	DEG_GSE273695_Brain_Male_LPS
NCAPD3	1	0	NA	1	DEG_GSE273695_Brain_Male_LPS
NCAPH2	1	0	NA	1	DEG_GSE242892_16p11dup
NCDN	1	0	NA	1	DEG_GSE242892_16p11dup
NCOA2	1	0	NA	1	DEG_GSE273695_Brain_Male_LPS
NCOA3	1	0	NA	1	DEG_GSE273695_Brain_Male_LPS
NCOA7	1	0	NA	1	DEG_GSE273695_Brain_Male_LPS
NDN	1	1	DEG_GSE189821_Female_Amy	0	NA
NDRG2	1	0	NA	1	DEG_GSE244644_FetalAorta
NDST3	1	0	NA	1	DEG_GSE273695_Brain_Male_LPS
NDUFA13	1	1	DEG_GSE273695_Brain_Male_LPS	0	NA
NDUFA2	1	1	DEG_GSE273695_Brain_Male_LPS	0	NA
NDUFA6	1	1	DEG_GSE273695_Brain_Male_LPS	0	NA
NDUFA8	1	1	DEG_GSE273695_Brain_Male_LPS	0	NA
NDUFAF6	1	1	DEG_GSE189821_Female_Amy	0	NA
NDUFB2	1	1	DEG_GSE273695_Brain_Male_LPS	0	NA
NDUFB4	1	1	DEG_GSE273695_Brain_Male_LPS	0	NA
NDUFB7	1	1	DEG_GSE273695_Brain_Male_LPS	0	NA
NDUFC1	1	1	DEG_GSE273695_Brain_Male_LPS	0	NA
NDUFC2	1	1	DEG_GSE273695_Brain_Male_LPS	0	NA
NDUFS3	1	1	DEG_GSE273695_Brain_Male_LPS	0	NA
NDUFS7	1	1	DEG_GSE273695_Brain_Male_LPS	0	NA
NEBL	1	0	NA	1	DEG_GSE273695_Brain_Male_LPS
NECAB3	1	0	NA	1	DEG_GSE189821_Female_Amy
NEFL	1	0	NA	1	DEG_GSE189821_Female_Amy
NEFM	1	1	DEG_GSE189821_Female_DMS	0	NA
NEIL1	1	1	DEG_GSE189821_Female_Amy	0	NA
NEK10	1	0	NA	1	DEG_GSE273695_Brain_Male_LPS
NELFE	1	1	DEG_GSE273695_Brain_Male_LPS	0	NA
NENF	1	1	DEG_GSE189821_Female_Amy	0	NA
NEO1	1	0	NA	1	DEG_GSE273695_Brain_Male_LPS
NETO1	1	0	NA	1	DEG_GSE189821_Female_Amy
NEU2	1	0	NA	1	DEG_GSE189821_Female_Amy
NEURL1B	1	0	NA	1	DEG_GSE273695_Brain_Male_LPS
NEUROD2	1	0	NA	1	DEG_GSE189821_Female_Amy
NEUROD6	1	0	NA	1	DEG_GSE189821_Female_Amy
NEXMIF	1	0	NA	1	DEG_GSE273695_Brain_Male_LPS
NF1	1	0	NA	1	DEG_GSE273695_Brain_Male_LPS
NFIB	1	0	NA	1	DEG_GSE273695_Brain_Male_LPS
NFIL3	1	1	DEG_GSE273695_Brain_Male_LPS	0	NA
NFKB2	1	1	DEG_GSE242892_16p11dup	0	NA
NFKBIL1	1	0	NA	1	DEG_GSE242892_16p11dup
NGB	1	1	DEG_GSE189821_Female_Amy	0	NA
NGDN	1	1	DEG_GSE189821_Female_Amy	0	NA
NGEF	1	0	NA	1	DEG_GSE189821_Female_Amy
NHLRC1	1	0	NA	1	DEG_GSE242892_16p11dup
NID1	1	0	NA	1	DEG_GSE116813_vehicle
NIN	1	0	NA	1	DEG_GSE189821_Female_Amy
NIPAL3	1	0	NA	1	DEG_GSE273695_Brain_Male_LPS
NKAIN4	1	1	DEG_GSE189821_Female_Amy	0	NA
NKAPL	1	0	NA	1	DEG_GSE242892_16p11dup
NKX3-1	1	0	NA	1	DEG_GSE189821_Female_Amy
NKX6-2	1	1	DEG_GSE189821_Female_Amy	0	NA
NLGN1	1	0	NA	1	DEG_GSE273695_Brain_Male_LPS
NLGN2	1	0	NA	1	DEG_GSE273695_Brain_Male_LPS
NLGN3	1	0	NA	1	DEG_GSE273695_Brain_Male_LPS
NLK	1	0	NA	1	DEG_GSE189821_Female_Amy
NMD3	1	1	DEG_GSE116813_vehicle	0	NA
NME2	1	1	DEG_GSE273695_Brain_Male_LPS	0	NA
NMNAT2	1	0	NA	1	DEG_GSE273695_Brain_Male_LPS
NMRAL1	1	1	DEG_GSE189821_Female_Amy	0	NA
NOC4L	1	0	NA	1	DEG_GSE189821_Female_Amy
NOP10	1	1	DEG_GSE181487	0	NA
NOP56	1	1	DEG_GSE189821_Female_Amy	0	NA
NOP58	1	0	NA	1	DEG_GSE189821_Male_VTA
NOSIP	1	1	DEG_GSE273695_Brain_Male_LPS	0	NA
NOTCH3	1	0	NA	1	DEG_GSE273695_Brain_Male_LPS
NOVA2	1	0	NA	1	DEG_GSE189821_Female_Amy
NPAS2	1	0	NA	1	DEG_GSE189821_Female_Amy
NPAS3	1	1	DEG_GSE116813_DISC1	0	NA
NPAS4	1	1	DEG_GSE116813_vehicle	0	NA
NPC2	1	1	DEG_GSE273695_Brain_Male_LPS	0	NA
NPFFR1	1	1	DEG_GSE189821_Female_Amy	0	NA
NPHP1	1	0	NA	1	DEG_GSE242892_WT
NPHP4	1	0	NA	1	DEG_GSE189821_Female_Amy
NPM1	1	1	DEG_GSE189821_Female_Amy	0	NA
NPPA	1	1	DEG_GSE273695_Brain_Female_LPS	0	NA
NPSR1	1	0	NA	1	DEG_GSE189821_Female_Amy
NPTX2	1	0	NA	1	DEG_GSE189821_Female_Amy
NPTXR	1	0	NA	1	DEG_GSE189821_Female_Amy
NR2F1	1	1	DEG_GSE273695_Brain_Male_LPS	0	NA
NR3C1	1	0	NA	1	DEG_GSE273695_Brain_Male_LPS
NR3C2	1	0	NA	1	DEG_GSE273695_Brain_Male_LPS
NR4A2	1	0	NA	1	DEG_GSE189821_Female_Amy
NRGN	1	0	NA	1	DEG_GSE116813_vehicle
NRIP1	1	0	NA	1	DEG_GSE273695_Brain_Male_LPS
NRN1	1	1	DEG_GSE273695_Brain_Male_LPS	0	NA
NRROS	1	0	NA	1	DEG_GSE189821_Female_Amy
NSA2	1	1	DEG_GSE189821_Female_Amy	0	NA
NSD1	1	0	NA	1	DEG_GSE273695_Brain_Male_LPS
NSD3	1	0	NA	1	DEG_GSE273695_Brain_Male_LPS
NT5C	1	1	DEG_GSE189821_Female_Amy	0	NA
NTNG2	1	0	NA	1	DEG_GSE189821_Female_Amy
NTRK3	1	0	NA	1	DEG_GSE189821_Female_PFC
NTS	1	1	DEG_GSE189821_Female_Amy	0	NA
NTSR1	1	1	DEG_GSE189821_Female_Amy	0	NA
NUDT17	1	1	DEG_GSE189821_Female_Amy	0	NA
NUDT22	1	0	NA	1	DEG_GSE244644_UmbilicalVein
NUDT4	1	1	DEG_GSE189821_Male_Nac	0	NA
NUDT9	1	1	DEG_GSE273695_Brain_Male_LPS	0	NA
NUP153	1	0	NA	1	DEG_GSE273695_Brain_Male_LPS
NUPR1	1	0	NA	1	DEG_GSE242892_WT
NXPE2	1	0	NA	1	DEG_GSE273695_Blood_Female_LPS
NXPH2	1	1	DEG_GSE189821_Female_Amy	0	NA
NXT2	1	1	DEG_GSE189821_Female_Amy	0	NA
OAZ1	1	1	DEG_GSE273695_Brain_Male_LPS	0	NA
ODC1	1	1	DEG_GSE273695_Blood_Male_Saline	0	NA
OGDH	1	0	NA	1	DEG_GSE189821_Female_Amy
OGDHL	1	1	DEG_GSE116813_vehicle	0	NA
OGFRL1	1	0	NA	1	DEG_GSE273695_Brain_Male_LPS
OLFM3	1	1	DEG_GSE189821_Female_Amy	0	NA
OLFML2A	1	0	NA	1	DEG_GSE116813_vehicle
OPA1	1	0	NA	1	DEG_GSE273695_Brain_Male_LPS
OPRL1	1	1	DEG_GSE189821_Female_Amy	0	NA
ORC4	1	1	DEG_GSE242892_16p11dup	0	NA
ORC6	1	0	NA	1	DEG_GSE242892_16p11dup
OSBP2	1	0	NA	1	DEG_GSE189821_Female_Amy
OSBPL1A	1	0	NA	1	DEG_GSE189821_Female_Amy
OSBPL6	1	0	NA	1	DEG_GSE273695_Brain_Male_LPS
OSBPL8	1	0	NA	1	DEG_GSE273695_Brain_Male_LPS
OSCAR	1	1	DEG_GSE235969_Male_Young_5wk	0	NA
OSCP1	1	1	DEG_GSE273695_Brain_Male_LPS	0	NA
OTUD3	1	0	NA	1	DEG_GSE189821_Female_Amy
OTUD4	1	0	NA	1	DEG_GSE273695_Brain_Male_LPS
OTUD7A	1	0	NA	1	DEG_GSE189821_Female_Amy
OTX2	1	1	DEG_GSE235969_Male_Young_5wk	0	NA
OVOL2	1	0	NA	1	DEG_GSE189821_Female_Amy
OXCT1	1	1	DEG_GSE242892_WT	0	NA
OXNAD1	1	0	NA	1	DEG_GSE242892_WT
P2RX1	1	0	NA	1	DEG_GSE242892_WT
P3H4	1	1	DEG_GSE189821_Female_Amy	0	NA
PABPN1	1	1	DEG_GSE273695_Brain_Male_LPS	0	NA
PACS1	1	0	NA	1	DEG_GSE242892_WT
PACS2	1	0	NA	1	DEG_GSE273695_Brain_Male_LPS
PAFAH1B1	1	0	NA	1	DEG_GSE273695_Brain_Male_LPS
PAFAH1B3	1	1	DEG_GSE189821_Female_Amy	0	NA
PAM16	1	1	DEG_GSE273695_Brain_Male_LPS	0	NA
PANK4	1	1	DEG_GSE189821_Female_Amy	0	NA
PANX1	1	1	DEG_GSE189821_Female_Amy	0	NA
PAQR6	1	1	DEG_GSE189821_Female_Amy	0	NA
PAQR8	1	1	DEG_GSE242892_16p11dup	0	NA
PAQR9	1	0	NA	1	DEG_GSE189821_Female_Amy
PARD6B	1	0	NA	1	DEG_GSE189821_Female_Amy
PARK7	1	1	DEG_GSE273695_Brain_Male_LPS	0	NA
PARS2	1	0	NA	1	DEG_GSE242892_16p11dup
PARVA	1	0	NA	1	DEG_GSE273695_Brain_Male_LPS
PARVB	1	1	DEG_GSE189821_Female_Amy	0	NA
PAWR	1	0	NA	1	DEG_GSE189821_Female_Amy
PAXX	1	1	DEG_GSE273695_Brain_Male_LPS	0	NA
PBRM1	1	0	NA	1	DEG_GSE273695_Brain_Male_LPS
PC	1	0	NA	1	DEG_GSE244644_FetalAorta
PCBD1	1	1	DEG_GSE189821_Female_Amy	0	NA
PCDH1	1	0	NA	1	DEG_GSE189821_Female_Amy
PCDH11X	1	0	NA	1	DEG_GSE273695_Brain_Male_LPS
PCDH15	1	1	DEG_GSE116813_vehicle	0	NA
PCDH17	1	0	NA	1	DEG_GSE273695_Brain_Male_LPS
PCDH7	1	0	NA	1	DEG_GSE273695_Brain_Male_LPS
PCDH9	1	0	NA	1	DEG_GSE273695_Brain_Male_LPS
PCDHGC4	1	1	DEG_GSE213734_vehicle	0	NA
PCGF2	1	0	NA	1	DEG_GSE198578
PCGF3	1	0	NA	1	DEG_GSE273695_Brain_Male_LPS
PCLO	1	0	NA	1	DEG_GSE273695_Brain_Male_LPS
PCNX1	1	0	NA	1	DEG_GSE273695_Brain_Male_LPS
PCNX2	1	0	NA	1	DEG_GSE189821_Female_Amy
PCOLCE	1	0	NA	1	DEG_GSE116813_vehicle
PCSK1N	1	1	DEG_GSE273695_Brain_Male_LPS	0	NA
PCSK2	1	0	NA	1	DEG_GSE189821_Female_Amy
PCYOX1	1	0	NA	1	DEG_GSE273695_Brain_Male_LPS
PCYOX1L	1	0	NA	1	DEG_GSE242892_16p11dup
PDAP1	1	1	DEG_GSE273695_Brain_Male_LPS	0	NA
PDCL3	1	1	DEG_GSE189821_Female_Amy	0	NA
PDE1A	1	0	NA	1	DEG_GSE273695_Brain_Male_LPS
PDE1B	1	0	NA	1	DEG_GSE189821_Female_Amy
PDE2A	1	0	NA	1	DEG_GSE189821_Female_Amy
PDE3B	1	1	DEG_GSE189821_Female_PFC	0	NA
PDE4D	1	0	NA	1	DEG_GSE273695_Brain_Male_LPS
PDGFRL	1	1	DEG_GSE181487	0	NA
PDHX	1	0	NA	1	DEG_GSE242892_16p11dup
PDIA3	1	0	NA	1	DEG_GSE116813_vehicle
PDK2	1	0	NA	1	DEG_GSE189821_Female_Amy
PDK4	1	0	NA	1	DEG_GSE244644_FetalAorta
PDLIM4	1	1	DEG_GSE273695_Brain_Male_LPS	0	NA
PDS5A	1	0	NA	1	DEG_GSE273695_Brain_Male_LPS
PDS5B	1	0	NA	1	DEG_GSE273695_Brain_Male_LPS
PDYN	1	0	NA	1	DEG_GSE189821_Female_DMS
PEAK1	1	0	NA	1	DEG_GSE273695_Brain_Male_LPS
PEAR1	1	0	NA	1	DEG_GSE242892_16p11dup
PEBP1	1	1	DEG_GSE273695_Blood_Male_Saline	0	NA
PER2	1	1	DEG_GSE189821_Female_DMS	0	NA
PER3	1	0	NA	1	DEG_GSE273695_Brain_Male_LPS
PERM1	1	1	DEG_GSE242892_16p11dup	0	NA
PES1	1	1	DEG_GSE213734_vehicle	0	NA
PEX13	1	1	DEG_GSE116813_vehicle	0	NA
PFDN5	1	1	DEG_GSE273695_Brain_Male_LPS	0	NA
PFDN6	1	1	DEG_GSE273695_Brain_Male_LPS	0	NA
PFKFB2	1	0	NA	1	DEG_GSE273695_Brain_Male_LPS
PFKL	1	0	NA	1	DEG_GSE189821_Female_Amy
PFKP	1	0	NA	1	DEG_GSE189821_Female_Amy
PFN1	1	1	DEG_GSE273695_Brain_Male_LPS	0	NA
PGAP1	1	1	DEG_GSE116813_vehicle	0	NA
PGBD5	1	0	NA	1	DEG_GSE189821_Female_Amy
PGD	1	0	NA	1	DEG_GSE273695_Brain_Male_LPS
PGLS	1	1	DEG_GSE273695_Brain_Male_LPS	0	NA
PGM2L1	1	0	NA	1	DEG_GSE189821_Female_Amy
PGR	1	0	NA	1	DEG_GSE273695_Brain_Male_LPS
PHACTR1	1	0	NA	1	DEG_GSE189821_Female_Amy
PHC3	1	0	NA	1	DEG_GSE273695_Brain_Male_LPS
PHF1	1	1	DEG_GSE189821_Female_Amy	0	NA
PHF19	1	1	DEG_GSE189821_Female_Amy	0	NA
PHF20	1	0	NA	1	DEG_GSE189821_Female_Amy
PHF21A	1	1	DEG_GSE189821_Female_DMS	0	NA
PHLPP2	1	0	NA	1	DEG_GSE273695_Brain_Male_LPS
PHTF2	1	0	NA	1	DEG_GSE189821_Female_Amy
PHYHIP	1	0	NA	1	DEG_GSE189821_Female_Amy
PI16	1	1	DEG_GSE189821_Female_Amy	0	NA
PI4K2B	1	0	NA	1	DEG_GSE189821_Female_Amy
PIGH	1	0	NA	1	DEG_GSE242892_16p11dup
PIGS	1	0	NA	1	DEG_GSE242892_16p11dup
PIGU	1	1	DEG_GSE189821_Female_Amy	0	NA
PIGY	1	0	NA	1	DEG_GSE242892_WT
PIK3R2	1	0	NA	1	DEG_GSE189821_Female_Amy
PIKFYVE	1	0	NA	1	DEG_GSE273695_Brain_Male_LPS
PIM3	1	1	DEG_GSE273695_Brain_Male_LPS	0	NA
PIP4K2C	1	0	NA	1	DEG_GSE189821_Female_Amy
PIP5K1A	1	1	DEG_GSE242892_WT	0	NA
PIP5K1C	1	0	NA	1	DEG_GSE189821_Female_Amy
PISD	1	1	DEG_GSE189821_Female_Amy	0	NA
PITPNC1	1	0	NA	1	DEG_GSE273695_Brain_Male_LPS
PITPNM3	1	1	DEG_GSE116813_vehicle	0	NA
PITRM1	1	0	NA	1	DEG_GSE189821_Female_Amy
PKIG	1	1	DEG_GSE273695_Brain_Male_LPS	0	NA
PLA2G4A	1	1	DEG_GSE189821_Female_Amy	0	NA
PLA2G4C	1	1	DEG_GSE189821_Male_Amy	0	NA
PLA2G7	1	1	DEG_GSE189821_Female_Amy	0	NA
PLAA	1	1	DEG_GSE242892_16p11dup	0	NA
PLCH2	1	0	NA	1	DEG_GSE189821_Female_Amy
PLCL1	1	0	NA	1	DEG_GSE273695_Brain_Male_Saline
PLCXD2	1	1	DEG_GSE116813_vehicle	0	NA
PLD5	1	1	DEG_GSE189821_Female_Amy	0	NA
PLEKHA2	1	0	NA	1	DEG_GSE189821_Female_Amy
PLEKHA6	1	0	NA	1	DEG_GSE273695_Brain_Male_LPS
PLEKHD1	1	1	DEG_GSE189821_Female_Amy	0	NA
PLK2	1	0	NA	1	DEG_GSE189821_Female_Amy
PLLP	1	1	DEG_GSE273695_Brain_Male_LPS	0	NA
PLP1	1	1	DEG_GSE242892_16p11dup	0	NA
PLPP3	1	0	NA	1	DEG_GSE242892_16p11dup
PLPP6	1	0	NA	1	DEG_GSE189821_Female_Amy
PLPPR4	1	0	NA	1	DEG_GSE189821_Female_Amy
PLPPR5	1	0	NA	1	DEG_GSE189821_Female_Amy
PLS3	1	0	NA	1	DEG_GSE189821_Female_Amy
PLXNA1	1	0	NA	1	DEG_GSE273695_Brain_Male_LPS
PLXNA2	1	0	NA	1	DEG_GSE273695_Brain_Male_LPS
PLXNA4	1	0	NA	1	DEG_GSE273695_Brain_Male_LPS
PMEPA1	1	0	NA	1	DEG_GSE189821_Female_Amy
PMS1	1	1	DEG_GSE242892_WT	0	NA
PMVK	1	1	DEG_GSE189821_Female_Amy	0	NA
PNCK	1	1	DEG_GSE189821_Female_Amy	0	NA
PNMA3	1	1	DEG_GSE189821_Female_Amy	0	NA
PNOC	1	1	DEG_GSE189821_Female_Amy	0	NA
PNP	1	1	DEG_GSE273695_Brain_Male_LPS	0	NA
PNRC2	1	1	DEG_GSE189821_Female_Amy	0	NA
PODXL	1	0	NA	1	DEG_GSE116813_vehicle
POGLUT1	1	1	DEG_GSE189821_Female_Amy	0	NA
POLE3	1	0	NA	1	DEG_GSE242892_WT
POLR2E	1	1	DEG_GSE273695_Brain_Male_LPS	0	NA
POLR3H	1	1	DEG_GSE189821_Female_Amy	0	NA
POM121	1	0	NA	1	DEG_GSE189821_Female_Amy
POMP	1	1	DEG_GSE235969_Female_Old_5d	0	NA
PPARGC1A	1	0	NA	1	DEG_GSE273695_Brain_Male_LPS
PPAT	1	0	NA	1	DEG_GSE242892_16p11dup
PPFIA2	1	0	NA	1	DEG_GSE273695_Brain_Male_LPS
PPFIA3	1	0	NA	1	DEG_GSE242892_WT
PPFIBP1	1	0	NA	1	DEG_GSE273695_Brain_Male_LPS
PPIA	1	1	DEG_GSE273695_Brain_Male_LPS	0	NA
PPIB	1	1	DEG_GSE273695_Brain_Male_LPS	0	NA
PPM1H	1	0	NA	1	DEG_GSE273695_Brain_Male_LPS
PPM1L	1	0	NA	1	DEG_GSE273695_Brain_Male_LPS
PPP1R12B	1	0	NA	1	DEG_GSE273695_Brain_Male_LPS
PPP1R14B	1	1	DEG_GSE189821_Female_Amy	0	NA
PPP1R14C	1	1	DEG_GSE189821_Female_Amy	0	NA
PPP1R15A	1	1	DEG_GSE273695_Brain_Male_LPS	0	NA
PPP1R16B	1	0	NA	1	DEG_GSE273695_Brain_Male_LPS
PPP1R17	1	1	DEG_GSE189821_Female_Amy	0	NA
PPP1R1A	1	1	DEG_GSE273695_Brain_Male_LPS	0	NA
PPP1R1B	1	0	NA	1	DEG_GSE189821_Female_Amy
PPP1R9B	1	0	NA	1	DEG_GSE189821_Female_Amy
PPP6R1	1	0	NA	1	DEG_GSE189821_Female_Amy
PRADC1	1	0	NA	1	DEG_GSE242892_16p11dup
PRCD	1	1	DEG_GSE235969_Male_Young_5wk	0	NA
PRDM16	1	1	DEG_GSE213734_vehicle	0	NA
PRDM8	1	0	NA	1	DEG_GSE189821_Female_Amy
PRDX1	1	1	DEG_GSE189821_Female_Amy	0	NA
PRDX3	1	1	DEG_GSE181487	0	NA
PRDX5	1	1	DEG_GSE273695_Brain_Male_LPS	0	NA
PRELID3A	1	0	NA	1	DEG_GSE242892_WT
PREP	1	0	NA	1	DEG_GSE189821_Female_Amy
PREPL	1	0	NA	1	DEG_GSE273695_Brain_Male_LPS
PREX2	1	0	NA	1	DEG_GSE273695_Brain_Male_LPS
PRICKLE1	1	0	NA	1	DEG_GSE189821_Female_Amy
PRICKLE4	1	1	DEG_GSE273695_Brain_Male_LPS	0	NA
PRKAA2	1	0	NA	1	DEG_GSE189821_Female_Amy
PRKAB2	1	0	NA	1	DEG_GSE273695_Brain_Male_LPS
PRKCB	1	0	NA	1	DEG_GSE189821_Female_Amy
PRKCE	1	0	NA	1	DEG_GSE189821_Female_Amy
PRKCG	1	0	NA	1	DEG_GSE189821_Female_Amy
PRKCH	1	0	NA	1	DEG_GSE189821_Female_Amy
PRKG1	1	1	DEG_GSE242892_WT	0	NA
PRKRIP1	1	1	DEG_GSE189821_Female_Amy	0	NA
PRLR	1	1	DEG_GSE235969_Male_Young_5wk	0	NA
PRMT8	1	0	NA	1	DEG_GSE189821_Female_Amy
PRPF19	1	0	NA	1	DEG_GSE116813_vehicle
PRPF31	1	0	NA	1	DEG_GSE242892_WT
PRPF8	1	0	NA	1	DEG_GSE273695_Brain_Male_LPS
PRPSAP1	1	1	DEG_GSE189821_Female_Amy	0	NA
PRR14L	1	0	NA	1	DEG_GSE273695_Brain_Male_LPS
PRR29	1	1	DEG_GSE273695_Blood_Male_LPS	0	NA
PRR7	1	1	DEG_GSE273695_Brain_Male_LPS	0	NA
PRRC1	1	0	NA	1	DEG_GSE213734_vehicle
PRRC2B	1	0	NA	1	DEG_GSE273695_Brain_Male_LPS
PRRT3	1	0	NA	1	DEG_GSE189821_Female_Amy
PRSS12	1	0	NA	1	DEG_GSE189821_Female_Amy
PRXL2B	1	0	NA	1	DEG_GSE242892_16p11dup
PSD	1	1	DEG_GSE213734_vehicle	0	NA
PSENEN	1	1	DEG_GSE273695_Brain_Male_LPS	0	NA
PSMA7	1	1	DEG_GSE273695_Brain_Male_LPS	0	NA
PSMB10	1	1	DEG_GSE273695_Brain_Male_LPS	0	NA
PSMB3	1	1	DEG_GSE273695_Brain_Male_LPS	0	NA
PSMB4	1	1	DEG_GSE273695_Brain_Male_LPS	0	NA
PSMB5	1	1	DEG_GSE273695_Brain_Male_LPS	0	NA
PSMB6	1	1	DEG_GSE273695_Brain_Male_LPS	0	NA
PSMD10	1	1	DEG_GSE189821_Female_Amy	0	NA
PSMD4	1	1	DEG_GSE273695_Brain_Male_LPS	0	NA
PSMD7	1	0	NA	1	DEG_GSE242892_16p11dup
PSME3	1	0	NA	1	DEG_GSE189821_Female_Amy
PSTPIP1	1	0	NA	1	DEG_GSE242892_16p11dup
PTCRA	1	1	DEG_GSE273695_Brain_Male_LPS	0	NA
PTEN	1	0	NA	1	DEG_GSE273695_Brain_Male_LPS
PTGFRN	1	0	NA	1	DEG_GSE189821_Female_Amy
PTK2B	1	0	NA	1	DEG_GSE189821_Female_Amy
PTMA	1	1	DEG_GSE273695_Brain_Male_LPS	0	NA
PTMS	1	1	DEG_GSE273695_Brain_Male_LPS	0	NA
PTN	1	1	DEG_GSE273695_Brain_Male_LPS	0	NA
PTPMT1	1	1	DEG_GSE242892_16p11dup	0	NA
PTPN12	1	0	NA	1	DEG_GSE116813_vehicle
PTPN3	1	0	NA	1	DEG_GSE189821_Female_VTA
PTPN4	1	0	NA	1	DEG_GSE273695_Brain_Male_LPS
PTPRB	1	0	NA	1	DEG_GSE273695_Brain_Male_LPS
PTPRD	1	0	NA	1	DEG_GSE273695_Brain_Male_LPS
PTPRF	1	0	NA	1	DEG_GSE273695_Brain_Male_LPS
PTPRG	1	0	NA	1	DEG_GSE273695_Brain_Male_LPS
PTPRO	1	1	DEG_GSE235969_Female_Old_5d	0	NA
PTPRU	1	0	NA	1	DEG_GSE273695_Brain_Male_Saline
PWWP2B	1	0	NA	1	DEG_GSE189821_Female_Amy
PYCR3	1	1	DEG_GSE273695_Brain_Male_LPS	0	NA
PYGB	1	1	DEG_GSE189821_Female_VTA	0	NA
PYM1	1	1	DEG_GSE273695_Brain_Male_LPS	0	NA
QPCT	1	1	DEG_GSE189821_Female_Amy	0	NA
QSER1	1	0	NA	1	DEG_GSE273695_Brain_Male_LPS
R3HDM1	1	0	NA	1	DEG_GSE189821_Female_Amy
R3HDM2	1	0	NA	1	DEG_GSE189821_Female_Amy
R3HDM4	1	1	DEG_GSE273695_Brain_Male_LPS	0	NA
RAB11FIP4	1	0	NA	1	DEG_GSE273695_Brain_Male_LPS
RAB15	1	0	NA	1	DEG_GSE189821_Female_Amy
RAB30	1	0	NA	1	DEG_GSE273695_Brain_Male_LPS
RAB3IL1	1	0	NA	1	DEG_GSE273695_Blood_Female_LPS
RAB40B	1	0	NA	1	DEG_GSE189821_Female_Amy
RAB43	1	1	DEG_GSE235969_Male_Young_5wk	0	NA
RAB6B	1	0	NA	1	DEG_GSE189821_Female_Amy
RABAC1	1	1	DEG_GSE273695_Brain_Male_LPS	0	NA
RABGAP1L	1	0	NA	1	DEG_GSE273695_Brain_Male_LPS
RAD23A	1	0	NA	1	DEG_GSE242892_16p11dup
RAD54L2	1	1	DEG_GSE242892_WT	0	NA
RALGAPB	1	0	NA	1	DEG_GSE273695_Brain_Male_LPS
RALGPS2	1	0	NA	1	DEG_GSE273695_Brain_Male_LPS
RAMP3	1	1	DEG_GSE273695_Brain_Male_Saline	0	NA
RANBP1	1	0	NA	1	DEG_GSE242892_16p11dup
RANBP9	1	0	NA	1	DEG_GSE189821_Female_Amy
RAP1GAP	1	0	NA	1	DEG_GSE189821_Male_Nac
RAP1GAP2	1	0	NA	1	DEG_GSE273695_Brain_Male_LPS
RAPGEF1	1	0	NA	1	DEG_GSE273695_Brain_Male_LPS
RAPGEF2	1	0	NA	1	DEG_GSE273695_Brain_Male_LPS
RAPGEFL1	1	0	NA	1	DEG_GSE189821_Female_Amy
RARB	1	0	NA	1	DEG_GSE189821_Female_Amy
RASGEF1A	1	0	NA	1	DEG_GSE189821_Female_Amy
RASGEF1C	1	0	NA	1	DEG_GSE189821_Female_Amy
RASGRF2	1	1	DEG_GSE189821_Male_Nac	0	NA
RASL10A	1	0	NA	1	DEG_GSE189821_Female_Amy
RASL10B	1	0	NA	1	DEG_GSE189821_Female_Amy
RASL11A	1	1	DEG_GSE273695_Brain_Male_LPS	0	NA
RASL11B	1	0	NA	1	DEG_GSE189821_Female_Amy
RBFOX1	1	0	NA	1	DEG_GSE189821_Female_Amy
RBFOX3	1	0	NA	1	DEG_GSE189821_Female_Amy
RBM12B	1	0	NA	1	DEG_GSE273695_Blood_Male_Saline
RBM27	1	0	NA	1	DEG_GSE273695_Brain_Male_LPS
RBM33	1	0	NA	1	DEG_GSE242892_WT
RBM41	1	1	DEG_GSE242892_WT	0	NA
RBM8A	1	1	DEG_GSE273695_Brain_Male_LPS	0	NA
RBMS1	1	0	NA	1	DEG_GSE189821_Female_Amy
RBSN	1	0	NA	1	DEG_GSE273695_Brain_Male_LPS
RBX1	1	1	DEG_GSE189821_Female_Amy	0	NA
RCC2	1	0	NA	1	DEG_GSE189821_Female_Amy
RCN1	1	1	DEG_GSE189821_Female_Amy	0	NA
RDH10	1	0	NA	1	DEG_GSE242892_16p11dup
RDX	1	1	DEG_GSE189821_Male_Nac	0	NA
RECK	1	0	NA	1	DEG_GSE242892_16p11dup
REEP6	1	0	NA	1	DEG_GSE189821_Female_Amy
RESP18	1	1	DEG_GSE189821_Female_Amy	0	NA
REV3L	1	0	NA	1	DEG_GSE273695_Brain_Male_LPS
REX1BD	1	1	DEG_GSE273695_Brain_Male_LPS	0	NA
RFC3	1	1	DEG_GSE189821_Female_Amy	0	NA
RFESD	1	1	DEG_GSE242892_WT	0	NA
RFTN1	1	1	DEG_GSE189821_Female_Amy	0	NA
RFXAP	1	1	DEG_GSE242892_WT	0	NA
RGS10	1	1	DEG_GSE189821_Female_Amy	0	NA
RGS12	1	0	NA	1	DEG_GSE189821_Female_Amy
RGS14	1	0	NA	1	DEG_GSE189821_Female_Amy
RGS2	1	1	DEG_GSE235969_Female_Old_5d	0	NA
RGS7BP	1	0	NA	1	DEG_GSE189821_Female_Amy
RGS8	1	0	NA	1	DEG_GSE273695_Brain_Male_LPS
RHCG	1	1	DEG_GSE189821_Female_Amy	0	NA
RHD	1	0	NA	1	DEG_GSE273695_Blood_Female_LPS
RHEB	1	1	DEG_GSE273695_Brain_Male_LPS	0	NA
RHOBTB2	1	0	NA	1	DEG_GSE189821_Male_Nac
RHPN2	1	0	NA	1	DEG_GSE244644_FetalAorta
RIC1	1	0	NA	1	DEG_GSE273695_Brain_Male_LPS
RICTOR	1	0	NA	1	DEG_GSE273695_Brain_Male_LPS
RIDA	1	1	DEG_GSE189821_Female_Amy	0	NA
RIMS2	1	1	DEG_GSE116813_vehicle	0	NA
RIOX1	1	1	DEG_GSE242892_16p11dup	0	NA
RIPOR1	1	0	NA	1	DEG_GSE242892_16p11dup
RIT2	1	1	DEG_GSE189821_Female_Amy	0	NA
RMND5A	1	0	NA	1	DEG_GSE273695_Brain_Male_LPS
RNASE1	1	1	DEG_GSE244644_FetalAorta	0	NA
RNASE6	1	1	DEG_GSE189821_Female_Amy	0	NA
RNASEK	1	1	DEG_GSE273695_Brain_Male_LPS	0	NA
RND1	1	1	DEG_GSE189821_Female_Amy	0	NA
RND2	1	1	DEG_GSE189821_Female_Amy	0	NA
RND3	1	1	DEG_GSE189821_Female_Amy	0	NA
RNF112	1	0	NA	1	DEG_GSE189821_Female_Amy
RNF122	1	1	DEG_GSE189821_Female_Amy	0	NA
RNF123	1	0	NA	1	DEG_GSE189821_Male_Nac
RNF139	1	1	DEG_GSE273695_Brain_Male_LPS	0	NA
[truncated: 625 more rows]
