# Supplementary material for: Comparative analysis of 105 datasets across species and tissues reveals higher variability in transcriptomic responses to THC than CBD
Source: Research Square preprint supplement (doi:10.21203/rs.3.rs-6857614/v1), 2025-06-13
Supplement: Supplementary file 13 [file b9552b72e8f0ee2ba419db78.xlsx]

## Sheet: CBD_gene_consistency
X	Freq	down	down.Source	up	up.Source
HMOX1	23	4	DEG_GSE168797_Mock_CBDV; DEG_GSE270378_CBD0.325_6h; DEG_GSE270378_CBD1.5_6h; DEG_GSE275998_CDB10	19	DEG_GSE131565; DEG_GSE151512_12h; DEG_GSE151512_24h; DEG_GSE151512_3h; DEG_GSE151512_6h; DEG_GSE168797_Mock_CBD; DEG_GSE168797_SARS_CBD; DEG_GSE168797_SARS_CBDV; DEG_GSE179661_HepG2; DEG_GSE179661_MHCC97H; DEG_GSE201508_cGAMP; DEG_GSE201508_enthanol; DEG_GSE232624_EtOH0.75_CBD0.75_6h; DEG_GSE272113_CBD; DEG_GSE272113_sCBD; DEG_GSE274435_DMSO_24h; DEG_GSE274435_EtOH_24h; DEG_GSE274859_LPS_24h; GSE…
SLC30A1	23	0	NA	23	DEG_GSE131565; DEG_GSE151512_12h; DEG_GSE151512_24h; DEG_GSE151512_3h; DEG_GSE151512_6h; DEG_GSE168797_Mock_CBD; DEG_GSE168797_SARS_CBD; DEG_GSE179661_HepG2; DEG_GSE179661_MHCC97H; DEG_GSE201508_cGAMP; DEG_GSE201508_enthanol; DEG_GSE235310_LPS; DEG_GSE235310_Veh; DEG_GSE272113_CBD; DEG_GSE272113_sCBD; DEG_GSE274435_DMSO_24h; DEG_GSE274435_DMSO_4h; DEG_GSE274435_EtOH_24h; DEG_GSE274435_EtOH_4h; DE…
MT2A	22	0	NA	22	DEG_GSE131565; DEG_GSE151512_12h; DEG_GSE151512_24h; DEG_GSE151512_3h; DEG_GSE151512_6h; DEG_GSE179661_HepG2; DEG_GSE179661_MHCC97H; DEG_GSE201508_cGAMP; DEG_GSE201508_enthanol; DEG_GSE232624_EtOH0.75_CBD0.75_6h; DEG_GSE235310_LPS; DEG_GSE235310_Veh; DEG_GSE266113_mutCox15; DEG_GSE266113_WT; DEG_GSE272113_CBD; DEG_GSE272113_sCBD; DEG_GSE274435_DMSO_24h; DEG_GSE274435_EtOH_24h; DEG_GSE274859_LPS_2…
DDIT3	21	1	DEG_GSE168797_SARS_CBDV	20	DEG_GSE131565; DEG_GSE151512_12h; DEG_GSE151512_24h; DEG_GSE151512_3h; DEG_GSE151512_6h; DEG_GSE168797_Mock_CBD; DEG_GSE179661_HepG2; DEG_GSE179661_MHCC97H; DEG_GSE201508_cGAMP; DEG_GSE201508_enthanol; DEG_GSE235310_LPS; DEG_GSE235310_Veh; DEG_GSE261716_CBD0.2_2d; DEG_GSE272113_CBD; DEG_GSE272113_sCBD; DEG_GSE274435_DMSO_4h; DEG_GSE274435_EtOH_4h; DEG_GSE274859_LPS_24h; GSE70689_CBD_NoLPS; GSE706…
MT1E	21	3	DEG_GSE261716_CBD0.2_28d; DEG_GSE261716_CBD10_28d; DEG_GSE261716_CBD20_28d	18	DEG_GSE131565; DEG_GSE151512_12h; DEG_GSE151512_24h; DEG_GSE151512_3h; DEG_GSE151512_6h; DEG_GSE179661_HepG2; DEG_GSE179661_MHCC97H; DEG_GSE201508_cGAMP; DEG_GSE201508_enthanol; DEG_GSE232624_EtOH0.75_CBD0.75_6h; DEG_GSE232624_Veh_CBD3_6h; DEG_GSE235310_LPS; DEG_GSE235310_Veh; DEG_GSE266113_WT; DEG_GSE272113_CBD; DEG_GSE272113_sCBD; DEG_GSE274859_LPS_24h; DEG_GSE274859_LPS_4h
SLC3A2	21	1	DEG_GSE261716_CBD20_28d	20	DEG_GSE131565; DEG_GSE151512_12h; DEG_GSE151512_24h; DEG_GSE151512_3h; DEG_GSE151512_6h; DEG_GSE168797_Mock_CBD; DEG_GSE168797_SARS_CBD; DEG_GSE179661_HepG2; DEG_GSE179661_MHCC97H; DEG_GSE201508_cGAMP; DEG_GSE201508_enthanol; DEG_GSE235310_LPS; DEG_GSE235310_Veh; DEG_GSE266113_WT; DEG_GSE272113_CBD; DEG_GSE272113_sCBD; DEG_GSE274435_DMSO_24h; DEG_GSE274859_LPS_24h; GSE70689_CBD_NoLPS; GSE70689_CB…
HMGCS1	20	10	DEG_GSE131565; DEG_GSE152088; DEG_GSE168797_SARS_CBDV; DEG_GSE232624_EtOH0.25_CBD0.75_6h; DEG_GSE232624_EtOH0.75_CBD0.75_6h; DEG_GSE235310_LPS; DEG_GSE235310_Veh; DEG_GSE274435_DMSO_24h; DEG_GSE274435_EtOH_24h; DEG_GSE274859_LPS_24h	10	DEG_GSE151512_12h; DEG_GSE151512_24h; DEG_GSE151512_6h; DEG_GSE168797_Mock_CBD; DEG_GSE168797_Mock_CBDV; DEG_GSE168797_SARS_CBD; DEG_GSE201508_cGAMP; DEG_GSE201508_enthanol; DEG_GSE272113_CBD; DEG_GSE272113_sCBD
TRIB3	20	1	DEG_GSE152088	19	DEG_GSE131565; DEG_GSE151512_12h; DEG_GSE151512_24h; DEG_GSE151512_6h; DEG_GSE168797_Mock_CBD; DEG_GSE168797_SARS_CBD; DEG_GSE168797_SARS_CBDV; DEG_GSE179661_HepG2; DEG_GSE179661_MHCC97H; DEG_GSE201508_cGAMP; DEG_GSE235310_LPS; DEG_GSE235310_Veh; DEG_GSE272113_CBD; DEG_GSE272113_sCBD; DEG_GSE274435_DMSO_24h; DEG_GSE274435_EtOH_24h; DEG_GSE274859_LPS_24h; GSE70689_CBD_NoLPS; GSE70689_CBD_wLPS
DDIT4	19	4	DEG_GSE168797_SARS_CBDV; DEG_GSE261716_CBD0.2_2d; DEG_GSE274435_DMSO_4h; DEG_GSE274859_LPS_24h	15	DEG_GSE131565; DEG_GSE151512_3h; DEG_GSE152088; DEG_GSE168797_Mock_CBD; DEG_GSE179661_HepG2; DEG_GSE179661_MHCC97H; DEG_GSE201508_cGAMP; DEG_GSE235310_LPS; DEG_GSE235310_Veh; DEG_GSE266113_mutNdufs4; DEG_GSE272113_CBD; DEG_GSE272113_sCBD; DEG_GSE275998_CDB20; GSE70689_CBD_NoLPS; GSE70689_CBD_wLPS
GDF15	19	2	DEG_GSE168797_Mock_CBDV; DEG_GSE272113_CBD	17	DEG_GSE131565; DEG_GSE151512_24h; DEG_GSE168797_Mock_CBD; DEG_GSE179661_HepG2; DEG_GSE179661_MHCC97H; DEG_GSE201508_cGAMP; DEG_GSE232624_EtOH0.75_CBD0.75_6h; DEG_GSE235310_LPS; DEG_GSE235310_Veh; DEG_GSE261716_CBD20_28d; DEG_GSE261716_CBD20_2d; DEG_GSE266113_mutNdufs4; DEG_GSE274435_DMSO_24h; DEG_GSE274435_EtOH_24h; DEG_GSE274859_LPS_24h; GSE70689_CBD_NoLPS; GSE70689_CBD_wLPS
PTMS	19	13	DEG_GSE131565; DEG_GSE168797_Mock_CBD; DEG_GSE168797_SARS_CBD; DEG_GSE232624_EtOH0.75_CBD0.75_6h; DEG_GSE232624_Veh_CBD3_12h; DEG_GSE235310_LPS; DEG_GSE235310_Veh; DEG_GSE261716_CBD0.2_28d; DEG_GSE261716_CBD20_28d; DEG_GSE272113_CBD; DEG_GSE272113_sCBD; DEG_GSE274435_DMSO_24h; DEG_GSE274859_LPS_24h	6	DEG_GSE152088; DEG_GSE179661_HepG2; DEG_GSE179661_MHCC97H; DEG_GSE232624_EtOH0.25_CBD0.75_12h; DEG_GSE232624_EtOH0.75_CBD0.75_12h; DEG_GSE261716_CBD0.2_2d
SCD	19	10	DEG_GSE131565; DEG_GSE179661_HepG2; DEG_GSE179661_MHCC97H; DEG_GSE261716_CBD0.2_28d; DEG_GSE261716_CBD0.2_2d; DEG_GSE261716_CBD20_28d; DEG_GSE261716_CBD20_2d; DEG_GSE274435_DMSO_24h; DEG_GSE274435_EtOH_24h; DEG_GSE274859_LPS_24h	9	DEG_GSE151512_12h; DEG_GSE151512_24h; DEG_GSE151512_6h; DEG_GSE168797_SARS_CBD; DEG_GSE168797_SARS_CBDV; DEG_GSE201508_cGAMP; DEG_GSE201508_enthanol; DEG_GSE235310_LPS; DEG_GSE235310_Veh
SLC39A10	19	18	DEG_GSE131565; DEG_GSE151512_12h; DEG_GSE151512_3h; DEG_GSE151512_6h; DEG_GSE168797_Mock_CBD; DEG_GSE168797_SARS_CBD; DEG_GSE168797_SARS_CBDV; DEG_GSE179661_MHCC97H; DEG_GSE201508_cGAMP; DEG_GSE201508_enthanol; DEG_GSE232624_EtOH0.75_CBD0.75_6h; DEG_GSE235310_LPS; DEG_GSE235310_Veh; DEG_GSE272113_sCBD; DEG_GSE274435_DMSO_24h; DEG_GSE274435_EtOH_24h; DEG_GSE274859_LPS_24h; DEG_GSE274859_LPS_4h	1	DEG_GSE168797_Mock_CBDV
ATF4	18	2	DEG_GSE261716_CBD0.2_28d; DEG_GSE261716_CBD20_28d	16	DEG_GSE131565; DEG_GSE151512_12h; DEG_GSE151512_24h; DEG_GSE151512_3h; DEG_GSE151512_6h; DEG_GSE168797_Mock_CBD; DEG_GSE168797_SARS_CBD; DEG_GSE179661_HepG2; DEG_GSE179661_MHCC97H; DEG_GSE201508_cGAMP; DEG_GSE232624_EtOH0.75_CBD0.75_6h; DEG_GSE235310_Veh; DEG_GSE272113_sCBD; DEG_GSE274859_LPS_24h; GSE70689_CBD_NoLPS; GSE70689_CBD_wLPS
CDKN1A	18	7	DEG_GSE235310_LPS; DEG_GSE261716_CBD10_28d; DEG_GSE261716_CBD20_28d; DEG_GSE261716_CBD20_2d; DEG_GSE272113_CBD; DEG_GSE272113_sCBD; DEG_GSE274859_LPS_24h	11	DEG_GSE131565; DEG_GSE151512_12h; DEG_GSE151512_24h; DEG_GSE152088; DEG_GSE168797_Mock_CBD; DEG_GSE168797_SARS_CBD; DEG_GSE179661_HepG2; DEG_GSE179661_MHCC97H; DEG_GSE201508_enthanol; DEG_GSE261716_CBD0.2_28d; GSE70689_CBD_NoLPS
NEDD9	18	9	DEG_GSE131565; DEG_GSE151512_24h; DEG_GSE151512_6h; DEG_GSE168797_Mock_CBD; DEG_GSE168797_SARS_CBD; DEG_GSE168797_SARS_CBDV; DEG_GSE232624_EtOH0.75_CBD0.75_6h; DEG_GSE272113_CBD; DEG_GSE272113_sCBD	9	DEG_GSE168797_Mock_CBDV; DEG_GSE179661_HepG2; DEG_GSE179661_MHCC97H; DEG_GSE232624_EtOH0.75_CBD0.75_12h; DEG_GSE235310_LPS; DEG_GSE235310_Veh; DEG_GSE261716_CBD20_28d; DEG_GSE274859_LPS_24h; GSE70689_CBD_wLPS
NR1D1	18	2	DEG_GSE168797_SARS_CBD; DEG_GSE168797_SARS_CBDV	16	DEG_GSE131565; DEG_GSE151512_12h; DEG_GSE151512_24h; DEG_GSE151512_6h; DEG_GSE168797_Mock_CBD; DEG_GSE179661_HepG2; DEG_GSE179661_MHCC97H; DEG_GSE235310_LPS; DEG_GSE235310_Veh; DEG_GSE261716_CBD0.2_28d; DEG_GSE261716_CBD0.2_2d; DEG_GSE261716_CBD10_28d; DEG_GSE261716_CBD10_2d; DEG_GSE261716_CBD20_28d; DEG_GSE261716_CBD20_2d; DEG_GSE275998_CDB20
NR1D2	18	1	DEG_GSE168797_SARS_CBD	17	DEG_GSE131565; DEG_GSE151512_12h; DEG_GSE151512_24h; DEG_GSE151512_6h; DEG_GSE168797_Mock_CBD; DEG_GSE179661_HepG2; DEG_GSE179661_MHCC97H; DEG_GSE201508_cGAMP; DEG_GSE235310_Veh; DEG_GSE261716_CBD10_28d; DEG_GSE261716_CBD20_28d; DEG_GSE261716_CBD20_2d; DEG_GSE272113_CBD; DEG_GSE274435_DMSO_24h; DEG_GSE274859_LPS_24h; DEG_GSE275998_CDB10; DEG_GSE275998_CDB20
PPP1R15A	18	6	DEG_GSE168797_Mock_CBDV; DEG_GSE168797_SARS_CBDV; DEG_GSE261716_CBD20_28d; DEG_GSE270378_CBD0.75_6h; DEG_GSE270378_CBD1.5_6h; DEG_GSE270378_CBD3_6h	12	DEG_GSE131565; DEG_GSE151512_24h; DEG_GSE168797_Mock_CBD; DEG_GSE179661_HepG2; DEG_GSE179661_MHCC97H; DEG_GSE201508_cGAMP; DEG_GSE201508_enthanol; DEG_GSE235310_LPS; DEG_GSE235310_Veh; DEG_GSE261716_CBD0.2_2d; DEG_GSE272113_sCBD; DEG_GSE274859_LPS_24h
ACAT2	17	6	DEG_GSE131565; DEG_GSE179661_HepG2; DEG_GSE179661_MHCC97H; DEG_GSE235310_LPS; DEG_GSE261716_CBD20_28d; DEG_GSE274859_LPS_24h	11	DEG_GSE151512_12h; DEG_GSE151512_24h; DEG_GSE151512_6h; DEG_GSE168797_Mock_CBDV; DEG_GSE168797_SARS_CBDV; DEG_GSE201508_cGAMP; DEG_GSE201508_enthanol; DEG_GSE272113_CBD; DEG_GSE272113_sCBD
ALAS1	17	4	DEG_GSE151512_12h; DEG_GSE151512_24h; DEG_GSE151512_3h; DEG_GSE151512_6h	13	DEG_GSE131565; DEG_GSE168797_Mock_CBD; DEG_GSE168797_SARS_CBD; DEG_GSE179661_HepG2; DEG_GSE179661_MHCC97H; DEG_GSE201508_cGAMP; DEG_GSE235310_LPS; DEG_GSE235310_Veh; DEG_GSE261716_CBD0.2_28d; DEG_GSE261716_CBD10_28d; DEG_GSE261716_CBD10_2d; DEG_GSE261716_CBD20_28d; DEG_GSE275998_CDB20
ASNS	17	1	DEG_GSE168797_Mock_CBDV	16	DEG_GSE131565; DEG_GSE151512_12h; DEG_GSE151512_24h; DEG_GSE151512_3h; DEG_GSE151512_6h; DEG_GSE168797_Mock_CBD; DEG_GSE168797_SARS_CBD; DEG_GSE168797_SARS_CBDV; DEG_GSE179661_HepG2; DEG_GSE179661_MHCC97H; DEG_GSE201508_cGAMP; DEG_GSE235310_LPS; DEG_GSE235310_Veh; DEG_GSE272113_sCBD; DEG_GSE274859_LPS_24h; GSE70689_CBD_wLPS
BRI3	17	1	DEG_GSE168797_Mock_CBDV	16	DEG_GSE131565; DEG_GSE151512_24h; DEG_GSE152088; DEG_GSE168797_Mock_CBD; DEG_GSE168797_SARS_CBD; DEG_GSE168797_SARS_CBDV; DEG_GSE179661_HepG2; DEG_GSE179661_MHCC97H; DEG_GSE201508_cGAMP; DEG_GSE201508_enthanol; DEG_GSE235310_LPS; DEG_GSE235310_Veh; DEG_GSE261716_CBD0.2_2d; DEG_GSE272113_CBD; DEG_GSE272113_sCBD; DEG_GSE274859_LPS_24h
CASTOR2	17	13	DEG_GSE151512_12h; DEG_GSE151512_24h; DEG_GSE151512_3h; DEG_GSE151512_6h; DEG_GSE168797_Mock_CBD; DEG_GSE168797_SARS_CBD; DEG_GSE179661_MHCC97H; DEG_GSE261716_CBD10_2d; DEG_GSE261716_CBD20_28d; DEG_GSE261716_CBD20_2d; DEG_GSE272113_CBD; DEG_GSE272113_sCBD; DEG_GSE274859_LPS_24h	4	DEG_GSE131565; DEG_GSE168797_Mock_CBDV; DEG_GSE179661_HepG2; DEG_GSE201508_cGAMP
GCLM	17	1	DEG_GSE179661_MHCC97H	16	DEG_GSE131565; DEG_GSE151512_12h; DEG_GSE151512_24h; DEG_GSE151512_6h; DEG_GSE168797_Mock_CBD; DEG_GSE168797_SARS_CBD; DEG_GSE168797_SARS_CBDV; DEG_GSE179661_HepG2; DEG_GSE201508_cGAMP; DEG_GSE201508_enthanol; DEG_GSE232624_EtOH0.25_CBD0.75_12h; DEG_GSE272113_CBD; DEG_GSE272113_sCBD; DEG_GSE274859_LPS_24h; GSE70689_CBD_NoLPS; GSE70689_CBD_wLPS
HSPA5	17	2	DEG_GSE151512_12h; DEG_GSE151512_24h	15	DEG_GSE131565; DEG_GSE151512_6h; DEG_GSE168797_Mock_CBD; DEG_GSE168797_SARS_CBD; DEG_GSE179661_HepG2; DEG_GSE179661_MHCC97H; DEG_GSE201508_cGAMP; DEG_GSE201508_enthanol; DEG_GSE235310_LPS; DEG_GSE272113_CBD; DEG_GSE272113_sCBD; DEG_GSE274435_DMSO_24h; DEG_GSE274435_DMSO_4h; DEG_GSE274435_EtOH_4h; DEG_GSE274859_LPS_24h
IDI1	17	7	DEG_GSE131565; DEG_GSE152088; DEG_GSE235310_LPS; DEG_GSE235310_Veh; DEG_GSE266113_WT; DEG_GSE274859_LPS_24h; DEG_GSE275998_CDB20	10	DEG_GSE151512_12h; DEG_GSE151512_24h; DEG_GSE151512_6h; DEG_GSE168797_Mock_CBD; DEG_GSE168797_Mock_CBDV; DEG_GSE168797_SARS_CBD; DEG_GSE201508_cGAMP; DEG_GSE201508_enthanol; DEG_GSE272113_CBD; DEG_GSE272113_sCBD
MSMO1	17	5	DEG_GSE152088; DEG_GSE179661_MHCC97H; DEG_GSE235310_LPS; DEG_GSE235310_Veh; DEG_GSE274859_LPS_24h	12	DEG_GSE131565; DEG_GSE151512_12h; DEG_GSE151512_24h; DEG_GSE151512_6h; DEG_GSE168797_Mock_CBD; DEG_GSE168797_Mock_CBDV; DEG_GSE168797_SARS_CBD; DEG_GSE179661_HepG2; DEG_GSE201508_cGAMP; DEG_GSE201508_enthanol; DEG_GSE272113_CBD; DEG_GSE272113_sCBD
PSAT1	17	3	DEG_GSE179661_HepG2; DEG_GSE201508_enthanol; DEG_GSE274859_LPS_24h	14	DEG_GSE131565; DEG_GSE151512_12h; DEG_GSE151512_24h; DEG_GSE151512_3h; DEG_GSE151512_6h; DEG_GSE168797_Mock_CBD; DEG_GSE168797_SARS_CBD; DEG_GSE179661_MHCC97H; DEG_GSE201508_cGAMP; DEG_GSE235310_LPS; DEG_GSE235310_Veh; DEG_GSE272113_CBD; DEG_GSE272113_sCBD; DEG_GSE274435_DMSO_24h
SQSTM1	17	2	DEG_GSE270378_CBD1.5_6h; DEG_GSE270378_CBD3_6h	15	DEG_GSE131565; DEG_GSE151512_12h; DEG_GSE151512_24h; DEG_GSE151512_6h; DEG_GSE168797_Mock_CBD; DEG_GSE168797_SARS_CBD; DEG_GSE179661_HepG2; DEG_GSE179661_MHCC97H; DEG_GSE201508_cGAMP; DEG_GSE201508_enthanol; DEG_GSE235310_Veh; DEG_GSE272113_CBD; DEG_GSE272113_sCBD; DEG_GSE274859_LPS_24h; GSE70689_CBD_NoLPS
TXNRD1	17	2	DEG_GSE168797_Mock_CBDV; DEG_GSE179661_MHCC97H	15	DEG_GSE131565; DEG_GSE151512_12h; DEG_GSE151512_24h; DEG_GSE151512_6h; DEG_GSE168797_Mock_CBD; DEG_GSE168797_SARS_CBD; DEG_GSE168797_SARS_CBDV; DEG_GSE179661_HepG2; DEG_GSE201508_cGAMP; DEG_GSE235310_LPS; DEG_GSE235310_Veh; DEG_GSE272113_CBD; DEG_GSE272113_sCBD; DEG_GSE274435_DMSO_24h; DEG_GSE274859_LPS_24h
UAP1L1	17	2	DEG_GSE168797_Mock_CBDV; DEG_GSE179661_MHCC97H	15	DEG_GSE151512_12h; DEG_GSE151512_24h; DEG_GSE152088; DEG_GSE168797_Mock_CBD; DEG_GSE168797_SARS_CBD; DEG_GSE179661_HepG2; DEG_GSE201508_cGAMP; DEG_GSE201508_enthanol; DEG_GSE235310_LPS; DEG_GSE235310_Veh; DEG_GSE261716_CBD0.2_2d; DEG_GSE272113_CBD; DEG_GSE272113_sCBD; DEG_GSE274435_DMSO_24h; DEG_GSE274859_LPS_24h
AMOTL2	16	8	DEG_GSE131565; DEG_GSE151512_12h; DEG_GSE151512_24h; DEG_GSE151512_6h; DEG_GSE168797_SARS_CBD; DEG_GSE168797_SARS_CBDV; DEG_GSE261716_CBD10_28d; DEG_GSE261716_CBD20_28d	8	DEG_GSE152088; DEG_GSE179661_HepG2; DEG_GSE179661_MHCC97H; DEG_GSE235310_LPS; DEG_GSE270378_CBD0.325_24h; DEG_GSE270378_CBD0.75_24h; DEG_GSE270378_CBD1.5_24h; DEG_GSE274859_LPS_24h
ANXA7	16	1	DEG_GSE235310_LPS	15	DEG_GSE131565; DEG_GSE151512_12h; DEG_GSE151512_24h; DEG_GSE151512_6h; DEG_GSE168797_Mock_CBD; DEG_GSE168797_SARS_CBD; DEG_GSE179661_MHCC97H; DEG_GSE201508_cGAMP; DEG_GSE232624_Veh_CBD0.75_12h; DEG_GSE232624_Veh_CBD3_12h; DEG_GSE261716_CBD10_28d; DEG_GSE261716_CBD20_28d; DEG_GSE272113_sCBD; DEG_GSE274435_EtOH_24h; DEG_GSE274859_LPS_24h
CEBPB	16	0	NA	16	DEG_GSE131565; DEG_GSE151512_12h; DEG_GSE151512_24h; DEG_GSE151512_3h; DEG_GSE151512_6h; DEG_GSE152088; DEG_GSE168797_Mock_CBD; DEG_GSE168797_SARS_CBD; DEG_GSE179661_HepG2; DEG_GSE179661_MHCC97H; DEG_GSE235310_LPS; DEG_GSE235310_Veh; DEG_GSE272113_CBD; DEG_GSE272113_sCBD; DEG_GSE274859_LPS_24h; GSE70689_CBD_NoLPS
CYP51A1	16	3	DEG_GSE235310_LPS; DEG_GSE235310_Veh; DEG_GSE274859_LPS_24h	13	DEG_GSE131565; DEG_GSE151512_12h; DEG_GSE151512_24h; DEG_GSE151512_6h; DEG_GSE168797_Mock_CBD; DEG_GSE168797_Mock_CBDV; DEG_GSE168797_SARS_CBD; DEG_GSE179661_HepG2; DEG_GSE201508_cGAMP; DEG_GSE201508_enthanol; DEG_GSE232624_EtOH0.75_CBD0.75_12h; DEG_GSE272113_CBD; DEG_GSE272113_sCBD
EGR1	16	8	DEG_GSE168797_SARS_CBD; DEG_GSE168797_SARS_CBDV; DEG_GSE179661_MHCC97H; DEG_GSE201508_cGAMP; DEG_GSE201508_enthanol; DEG_GSE261716_CBD10_28d; DEG_GSE272113_CBD; DEG_GSE272113_sCBD	8	DEG_GSE131565; DEG_GSE151512_12h; DEG_GSE151512_24h; DEG_GSE151512_3h; DEG_GSE151512_6h; DEG_GSE152088; DEG_GSE168797_Mock_CBD; DEG_GSE179661_HepG2
FTH1	16	0	NA	16	DEG_GSE131565; DEG_GSE151512_12h; DEG_GSE151512_24h; DEG_GSE151512_3h; DEG_GSE151512_6h; DEG_GSE152088; DEG_GSE168797_SARS_CBD; DEG_GSE179661_HepG2; DEG_GSE179661_MHCC97H; DEG_GSE201508_cGAMP; DEG_GSE201508_enthanol; DEG_GSE235310_Veh; DEG_GSE261716_CBD0.2_2d; DEG_GSE272113_CBD; DEG_GSE272113_sCBD; DEG_GSE274859_LPS_24h
HES1	16	10	DEG_GSE168797_Mock_CBD; DEG_GSE168797_SARS_CBD; DEG_GSE168797_SARS_CBDV; DEG_GSE235310_Veh; DEG_GSE270378_CBD0.325_6h; DEG_GSE270378_CBD0.75_6h; DEG_GSE270378_CBD3_6h; DEG_GSE272113_CBD; DEG_GSE272113_sCBD; DEG_GSE274859_LPS_24h	6	DEG_GSE131565; DEG_GSE151512_24h; DEG_GSE152088; DEG_GSE168797_Mock_CBDV; DEG_GSE179661_HepG2; DEG_GSE261716_CBD0.2_2d
HSP90B1	16	2	DEG_GSE151512_24h; DEG_GSE270378_CBD1.5_24h	14	DEG_GSE131565; DEG_GSE151512_6h; DEG_GSE168797_Mock_CBD; DEG_GSE168797_SARS_CBD; DEG_GSE168797_SARS_CBDV; DEG_GSE179661_MHCC97H; DEG_GSE201508_cGAMP; DEG_GSE201508_enthanol; DEG_GSE235310_LPS; DEG_GSE272113_CBD; DEG_GSE272113_sCBD; DEG_GSE274435_DMSO_24h; DEG_GSE274435_DMSO_4h; DEG_GSE274435_EtOH_24h
MT1X	16	1	DEG_GSE168797_Mock_CBD	15	DEG_GSE131565; DEG_GSE151512_12h; DEG_GSE151512_24h; DEG_GSE151512_3h; DEG_GSE151512_6h; DEG_GSE179661_HepG2; DEG_GSE179661_MHCC97H; DEG_GSE201508_cGAMP; DEG_GSE201508_enthanol; DEG_GSE232624_EtOH0.75_CBD0.75_6h; DEG_GSE235310_LPS; DEG_GSE235310_Veh; DEG_GSE266113_mutCox15; DEG_GSE266113_mutNdufs4; DEG_GSE266113_WT
MVD	16	4	DEG_GSE232624_Veh_CBD3_12h; DEG_GSE235310_LPS; DEG_GSE235310_Veh; DEG_GSE274859_LPS_24h	12	DEG_GSE151512_12h; DEG_GSE151512_24h; DEG_GSE151512_6h; DEG_GSE168797_Mock_CBD; DEG_GSE168797_Mock_CBDV; DEG_GSE168797_SARS_CBD; DEG_GSE179661_HepG2; DEG_GSE201508_cGAMP; DEG_GSE201508_enthanol; DEG_GSE232624_EtOH0.75_CBD0.75_6h; DEG_GSE272113_CBD; DEG_GSE272113_sCBD
PDIA4	16	2	DEG_GSE151512_12h; DEG_GSE151512_24h	14	DEG_GSE131565; DEG_GSE168797_Mock_CBD; DEG_GSE168797_SARS_CBD; DEG_GSE179661_MHCC97H; DEG_GSE201508_cGAMP; DEG_GSE201508_enthanol; DEG_GSE235310_LPS; DEG_GSE272113_CBD; DEG_GSE272113_sCBD; DEG_GSE274435_DMSO_24h; DEG_GSE274435_DMSO_4h; DEG_GSE274435_EtOH_24h; DEG_GSE274435_EtOH_4h; DEG_GSE274859_LPS_24h
PLIN2	16	3	DEG_GSE151512_12h; DEG_GSE151512_24h; DEG_GSE168797_Mock_CBDV	13	DEG_GSE131565; DEG_GSE168797_Mock_CBD; DEG_GSE168797_SARS_CBD; DEG_GSE168797_SARS_CBDV; DEG_GSE179661_HepG2; DEG_GSE179661_MHCC97H; DEG_GSE201508_cGAMP; DEG_GSE201508_enthanol; DEG_GSE235310_LPS; DEG_GSE235310_Veh; DEG_GSE272113_CBD; DEG_GSE272113_sCBD; DEG_GSE274859_LPS_24h
SLC7A11	16	2	DEG_GSE152088; DEG_GSE179661_MHCC97H	14	DEG_GSE131565; DEG_GSE151512_12h; DEG_GSE151512_24h; DEG_GSE151512_3h; DEG_GSE151512_6h; DEG_GSE168797_SARS_CBD; DEG_GSE168797_SARS_CBDV; DEG_GSE179661_HepG2; DEG_GSE201508_cGAMP; DEG_GSE272113_CBD; DEG_GSE272113_sCBD; DEG_GSE274435_DMSO_24h; DEG_GSE274859_LPS_24h; GSE70689_CBD_NoLPS
SNN	16	13	DEG_GSE131565; DEG_GSE151512_12h; DEG_GSE151512_24h; DEG_GSE151512_6h; DEG_GSE168797_Mock_CBD; DEG_GSE168797_SARS_CBD; DEG_GSE179661_MHCC97H; DEG_GSE201508_cGAMP; DEG_GSE201508_enthanol; DEG_GSE235310_LPS; DEG_GSE272113_CBD; DEG_GSE272113_sCBD; DEG_GSE274435_DMSO_24h	3	DEG_GSE152088; DEG_GSE168797_SARS_CBDV; DEG_GSE179661_HepG2
TFRC	16	12	DEG_GSE131565; DEG_GSE151512_12h; DEG_GSE151512_24h; DEG_GSE151512_6h; DEG_GSE152088; DEG_GSE168797_Mock_CBD; DEG_GSE179661_MHCC97H; DEG_GSE201508_cGAMP; DEG_GSE201508_enthanol; DEG_GSE274859_LPS_24h; GSE70689_CBD_NoLPS; GSE70689_CBD_wLPS	4	DEG_GSE168797_Mock_CBDV; DEG_GSE235310_Veh; DEG_GSE261716_CBD0.2_28d; DEG_GSE261716_CBD20_28d
USP2	16	4	DEG_GSE151512_3h; DEG_GSE179661_HepG2; DEG_GSE272113_CBD; DEG_GSE272113_sCBD	12	DEG_GSE131565; DEG_GSE151512_12h; DEG_GSE151512_24h; DEG_GSE201508_cGAMP; DEG_GSE201508_enthanol; DEG_GSE235310_LPS; DEG_GSE235310_Veh; DEG_GSE261716_CBD0.2_28d; DEG_GSE261716_CBD10_28d; DEG_GSE261716_CBD20_28d; DEG_GSE274859_LPS_24h; DEG_GSE275998_CDB20
WIPI1	16	7	DEG_GSE232624_EtOH0.75_CBD0.75_6h; DEG_GSE232624_Veh_CBD0.75_12h; DEG_GSE232624_Veh_CBD3_12h; DEG_GSE261716_CBD0.2_2d; DEG_GSE272113_CBD; DEG_GSE272113_sCBD; DEG_GSE274859_LPS_24h	9	DEG_GSE131565; DEG_GSE151512_24h; DEG_GSE168797_Mock_CBD; DEG_GSE168797_SARS_CBD; DEG_GSE179661_HepG2; DEG_GSE179661_MHCC97H; DEG_GSE201508_cGAMP; DEG_GSE232624_EtOH0.25_CBD0.75_12h; DEG_GSE235310_LPS
XBP1	16	0	NA	16	DEG_GSE131565; DEG_GSE151512_24h; DEG_GSE151512_3h; DEG_GSE151512_6h; DEG_GSE168797_Mock_CBD; DEG_GSE168797_SARS_CBD; DEG_GSE179661_HepG2; DEG_GSE179661_MHCC97H; DEG_GSE201508_cGAMP; DEG_GSE201508_enthanol; DEG_GSE235310_LPS; DEG_GSE235310_Veh; DEG_GSE272113_CBD; DEG_GSE272113_sCBD; DEG_GSE274435_DMSO_4h; DEG_GSE274859_LPS_24h
ADM	15	6	DEG_GSE151512_12h; DEG_GSE151512_24h; DEG_GSE151512_3h; DEG_GSE151512_6h; DEG_GSE168797_SARS_CBDV; DEG_GSE266113_WT	9	DEG_GSE131565; DEG_GSE152088; DEG_GSE168797_Mock_CBD; DEG_GSE179661_HepG2; DEG_GSE179661_MHCC97H; DEG_GSE235310_Veh; DEG_GSE270378_CBD0.75_24h; DEG_GSE272113_CBD; DEG_GSE272113_sCBD
ARRDC3	15	5	DEG_GSE152088; DEG_GSE168797_SARS_CBD; DEG_GSE168797_SARS_CBDV; DEG_GSE274859_LPS_24h; DEG_GSE275998_CDB20	10	DEG_GSE131565; DEG_GSE151512_24h; DEG_GSE151512_3h; DEG_GSE151512_6h; DEG_GSE168797_Mock_CBD; DEG_GSE179661_HepG2; DEG_GSE179661_MHCC97H; DEG_GSE235310_LPS; DEG_GSE261716_CBD20_28d; DEG_GSE274435_EtOH_24h
BTG1	15	5	DEG_GSE151512_12h; DEG_GSE151512_24h; DEG_GSE235310_LPS; DEG_GSE261716_CBD10_28d; DEG_GSE261716_CBD20_28d	10	DEG_GSE131565; DEG_GSE152088; DEG_GSE168797_Mock_CBD; DEG_GSE168797_SARS_CBD; DEG_GSE179661_HepG2; DEG_GSE179661_MHCC97H; DEG_GSE201508_cGAMP; DEG_GSE201508_enthanol; DEG_GSE235310_Veh; DEG_GSE274859_LPS_24h
CALR	15	2	DEG_GSE151512_12h; DEG_GSE151512_24h	13	DEG_GSE131565; DEG_GSE151512_6h; DEG_GSE168797_Mock_CBD; DEG_GSE168797_SARS_CBD; DEG_GSE179661_MHCC97H; DEG_GSE201508_cGAMP; DEG_GSE201508_enthanol; DEG_GSE235310_LPS; DEG_GSE261716_CBD0.2_2d; DEG_GSE272113_CBD; DEG_GSE272113_sCBD; DEG_GSE274435_DMSO_24h; DEG_GSE274859_LPS_24h
CHAC1	15	0	NA	15	DEG_GSE131565; DEG_GSE151512_12h; DEG_GSE151512_24h; DEG_GSE151512_3h; DEG_GSE151512_6h; DEG_GSE168797_Mock_CBD; DEG_GSE168797_SARS_CBD; DEG_GSE179661_MHCC97H; DEG_GSE201508_cGAMP; DEG_GSE235310_LPS; DEG_GSE235310_Veh; DEG_GSE261716_CBD0.2_28d; DEG_GSE272113_CBD; DEG_GSE272113_sCBD; DEG_GSE274859_LPS_24h
DHCR24	15	7	DEG_GSE131565; DEG_GSE179661_HepG2; DEG_GSE179661_MHCC97H; DEG_GSE235310_LPS; DEG_GSE235310_Veh; DEG_GSE274435_DMSO_24h; DEG_GSE274859_LPS_24h	8	DEG_GSE151512_12h; DEG_GSE151512_24h; DEG_GSE152088; DEG_GSE168797_Mock_CBDV; DEG_GSE168797_SARS_CBDV; DEG_GSE201508_cGAMP; DEG_GSE201508_enthanol; DEG_GSE232624_Veh_CBD3_12h
DNAJB9	15	0	NA	15	DEG_GSE131565; DEG_GSE151512_12h; DEG_GSE151512_24h; DEG_GSE151512_6h; DEG_GSE168797_Mock_CBD; DEG_GSE168797_SARS_CBD; DEG_GSE179661_HepG2; DEG_GSE179661_MHCC97H; DEG_GSE201508_cGAMP; DEG_GSE201508_enthanol; DEG_GSE235310_LPS; DEG_GSE235310_Veh; DEG_GSE272113_CBD; DEG_GSE272113_sCBD; DEG_GSE274859_LPS_24h
EIF4EBP1	15	0	NA	15	DEG_GSE131565; DEG_GSE151512_12h; DEG_GSE151512_24h; DEG_GSE151512_6h; DEG_GSE168797_Mock_CBD; DEG_GSE168797_SARS_CBD; DEG_GSE179661_HepG2; DEG_GSE179661_MHCC97H; DEG_GSE235310_LPS; DEG_GSE235310_Veh; DEG_GSE272113_CBD; DEG_GSE272113_sCBD; DEG_GSE274859_LPS_24h; GSE70689_CBD_NoLPS; GSE70689_CBD_wLPS
FTL	15	1	DEG_GSE168797_Mock_CBDV	14	DEG_GSE131565; DEG_GSE151512_12h; DEG_GSE151512_24h; DEG_GSE168797_Mock_CBD; DEG_GSE168797_SARS_CBD; DEG_GSE168797_SARS_CBDV; DEG_GSE179661_HepG2; DEG_GSE179661_MHCC97H; DEG_GSE201508_cGAMP; DEG_GSE201508_enthanol; DEG_GSE235310_LPS; DEG_GSE272113_CBD; DEG_GSE272113_sCBD; DEG_GSE274859_LPS_24h
GABARAPL1	15	2	DEG_GSE261716_CBD0.2_28d; DEG_GSE261716_CBD20_28d	13	DEG_GSE131565; DEG_GSE151512_24h; DEG_GSE152088; DEG_GSE168797_Mock_CBD; DEG_GSE168797_SARS_CBD; DEG_GSE179661_HepG2; DEG_GSE179661_MHCC97H; DEG_GSE201508_cGAMP; DEG_GSE201508_enthanol; DEG_GSE235310_LPS; DEG_GSE235310_Veh; DEG_GSE272113_sCBD; DEG_GSE274859_LPS_24h
HERPUD1	15	0	NA	15	DEG_GSE131565; DEG_GSE151512_24h; DEG_GSE151512_6h; DEG_GSE152088; DEG_GSE168797_Mock_CBD; DEG_GSE168797_SARS_CBD; DEG_GSE179661_HepG2; DEG_GSE179661_MHCC97H; DEG_GSE201508_cGAMP; DEG_GSE235310_Veh; DEG_GSE261716_CBD0.2_28d; DEG_GSE272113_CBD; DEG_GSE272113_sCBD; DEG_GSE274859_LPS_24h; GSE70689_CBD_NoLPS
HIVEP2	15	7	DEG_GSE151512_12h; DEG_GSE151512_24h; DEG_GSE151512_6h; DEG_GSE168797_SARS_CBD; DEG_GSE168797_SARS_CBDV; DEG_GSE274435_DMSO_24h; DEG_GSE274435_EtOH_24h	8	DEG_GSE131565; DEG_GSE168797_Mock_CBD; DEG_GSE179661_HepG2; DEG_GSE179661_MHCC97H; DEG_GSE235310_LPS; DEG_GSE235310_Veh; DEG_GSE272113_CBD; DEG_GSE274859_LPS_24h
HK2	15	5	DEG_GSE151512_12h; DEG_GSE151512_24h; DEG_GSE151512_6h; DEG_GSE261716_CBD20_28d; DEG_GSE274859_LPS_24h	10	DEG_GSE131565; DEG_GSE168797_Mock_CBD; DEG_GSE168797_SARS_CBD; DEG_GSE179661_HepG2; DEG_GSE201508_cGAMP; DEG_GSE235310_LPS; DEG_GSE235310_Veh; DEG_GSE272113_CBD; DEG_GSE272113_sCBD; DEG_GSE274435_EtOH_24h
HMGCR	15	4	DEG_GSE179661_MHCC97H; DEG_GSE235310_LPS; DEG_GSE235310_Veh; DEG_GSE274859_LPS_24h	11	DEG_GSE131565; DEG_GSE151512_12h; DEG_GSE151512_24h; DEG_GSE151512_6h; DEG_GSE168797_Mock_CBD; DEG_GSE168797_Mock_CBDV; DEG_GSE168797_SARS_CBD; DEG_GSE179661_HepG2; DEG_GSE201508_cGAMP; DEG_GSE201508_enthanol; DEG_GSE272113_CBD
IGFBP4	15	13	DEG_GSE131565; DEG_GSE151512_12h; DEG_GSE151512_24h; DEG_GSE151512_6h; DEG_GSE168797_Mock_CBD; DEG_GSE168797_SARS_CBD; DEG_GSE179661_MHCC97H; DEG_GSE201508_cGAMP; DEG_GSE201508_enthanol; DEG_GSE235310_LPS; DEG_GSE235310_Veh; DEG_GSE274859_LPS_24h; GSE70689_CBD_NoLPS	2	DEG_GSE179661_HepG2; DEG_GSE270378_CBD3_6h
INSIG1	15	4	DEG_GSE151512_3h; DEG_GSE235310_LPS; DEG_GSE235310_Veh; DEG_GSE274859_LPS_24h	11	DEG_GSE131565; DEG_GSE151512_12h; DEG_GSE151512_24h; DEG_GSE151512_6h; DEG_GSE168797_SARS_CBD; DEG_GSE168797_SARS_CBDV; DEG_GSE179661_MHCC97H; DEG_GSE201508_cGAMP; DEG_GSE201508_enthanol; DEG_GSE272113_CBD; DEG_GSE272113_sCBD
JPT1	15	14	DEG_GSE131565; DEG_GSE151512_12h; DEG_GSE151512_24h; DEG_GSE151512_6h; DEG_GSE168797_Mock_CBD; DEG_GSE168797_SARS_CBD; DEG_GSE179661_MHCC97H; DEG_GSE201508_cGAMP; DEG_GSE235310_LPS; DEG_GSE235310_Veh; DEG_GSE261716_CBD20_28d; DEG_GSE272113_CBD; DEG_GSE272113_sCBD; DEG_GSE274859_LPS_24h	1	DEG_GSE179661_HepG2
LGALS3	15	0	NA	15	DEG_GSE131565; DEG_GSE151512_24h; DEG_GSE151512_3h; DEG_GSE168797_SARS_CBDV; DEG_GSE179661_HepG2; DEG_GSE179661_MHCC97H; DEG_GSE201508_cGAMP; DEG_GSE201508_enthanol; DEG_GSE235310_LPS; DEG_GSE235310_Veh; DEG_GSE261716_CBD20_28d; DEG_GSE272113_CBD; DEG_GSE272113_sCBD; DEG_GSE274435_EtOH_24h; DEG_GSE274859_LPS_24h
LMO4	15	6	DEG_GSE151512_12h; DEG_GSE151512_6h; DEG_GSE168797_Mock_CBD; DEG_GSE168797_SARS_CBD; DEG_GSE168797_SARS_CBDV; DEG_GSE201508_cGAMP	9	DEG_GSE131565; DEG_GSE168797_Mock_CBDV; DEG_GSE235310_LPS; DEG_GSE235310_Veh; DEG_GSE272113_CBD; DEG_GSE272113_sCBD; DEG_GSE274859_LPS_24h; GSE70689_CBD_NoLPS; GSE70689_CBD_wLPS
MGST1	15	1	DEG_GSE179661_HepG2	14	DEG_GSE131565; DEG_GSE151512_6h; DEG_GSE168797_Mock_CBD; DEG_GSE168797_SARS_CBD; DEG_GSE168797_SARS_CBDV; DEG_GSE201508_cGAMP; DEG_GSE201508_enthanol; DEG_GSE235310_LPS; DEG_GSE235310_Veh; DEG_GSE261716_CBD20_28d; DEG_GSE261716_CBD20_2d; DEG_GSE272113_sCBD; DEG_GSE274435_DMSO_24h; DEG_GSE274859_LPS_24h
MTHFD2	15	2	DEG_GSE235310_LPS; DEG_GSE261716_CBD20_28d	13	DEG_GSE131565; DEG_GSE151512_12h; DEG_GSE151512_24h; DEG_GSE151512_3h; DEG_GSE151512_6h; DEG_GSE168797_Mock_CBD; DEG_GSE168797_SARS_CBD; DEG_GSE179661_HepG2; DEG_GSE201508_cGAMP; DEG_GSE235310_Veh; DEG_GSE272113_sCBD; GSE70689_CBD_NoLPS; GSE70689_CBD_wLPS
NDRG1	15	2	DEG_GSE151512_24h; DEG_GSE261716_CBD20_28d	13	DEG_GSE131565; DEG_GSE152088; DEG_GSE168797_Mock_CBD; DEG_GSE168797_SARS_CBD; DEG_GSE168797_SARS_CBDV; DEG_GSE179661_HepG2; DEG_GSE179661_MHCC97H; DEG_GSE232624_EtOH0.75_CBD0.75_6h; DEG_GSE235310_LPS; DEG_GSE272113_CBD; DEG_GSE272113_sCBD; GSE70689_CBD_NoLPS; GSE70689_CBD_wLPS
NSDHL	15	4	DEG_GSE179661_MHCC97H; DEG_GSE235310_LPS; DEG_GSE235310_Veh; DEG_GSE274859_LPS_24h	11	DEG_GSE151512_12h; DEG_GSE151512_24h; DEG_GSE151512_6h; DEG_GSE168797_Mock_CBD; DEG_GSE168797_Mock_CBDV; DEG_GSE168797_SARS_CBD; DEG_GSE179661_HepG2; DEG_GSE201508_cGAMP; DEG_GSE201508_enthanol; DEG_GSE272113_CBD; DEG_GSE272113_sCBD
ODC1	15	7	DEG_GSE131565; DEG_GSE152088; DEG_GSE168797_Mock_CBD; DEG_GSE168797_SARS_CBD; DEG_GSE168797_SARS_CBDV; DEG_GSE179661_MHCC97H; DEG_GSE201508_cGAMP	8	DEG_GSE151512_24h; DEG_GSE151512_6h; DEG_GSE235310_Veh; DEG_GSE261716_CBD0.2_2d; DEG_GSE261716_CBD20_28d; DEG_GSE266113_WT; DEG_GSE272113_CBD; DEG_GSE272113_sCBD
OSGIN1	15	3	DEG_GSE179661_MHCC97H; DEG_GSE261716_CBD0.2_28d; DEG_GSE272113_sCBD	12	DEG_GSE131565; DEG_GSE151512_12h; DEG_GSE151512_24h; DEG_GSE151512_6h; DEG_GSE168797_SARS_CBD; DEG_GSE168797_SARS_CBDV; DEG_GSE179661_HepG2; DEG_GSE201508_cGAMP; DEG_GSE235310_LPS; DEG_GSE235310_Veh; DEG_GSE274435_DMSO_24h; DEG_GSE274859_LPS_24h
P4HA2	15	7	DEG_GSE151512_12h; DEG_GSE151512_24h; DEG_GSE151512_6h; DEG_GSE235310_Veh; DEG_GSE261716_CBD20_28d; DEG_GSE274435_DMSO_24h; DEG_GSE274859_LPS_24h	8	DEG_GSE131565; DEG_GSE168797_Mock_CBD; DEG_GSE168797_SARS_CBD; DEG_GSE168797_SARS_CBDV; DEG_GSE179661_MHCC97H; DEG_GSE201508_cGAMP; DEG_GSE272113_CBD; DEG_GSE272113_sCBD
PHGDH	15	1	DEG_GSE201508_enthanol	14	DEG_GSE151512_12h; DEG_GSE151512_24h; DEG_GSE151512_3h; DEG_GSE151512_6h; DEG_GSE168797_Mock_CBD; DEG_GSE168797_SARS_CBD; DEG_GSE179661_HepG2; DEG_GSE179661_MHCC97H; DEG_GSE232624_EtOH0.75_CBD0.75_6h; DEG_GSE235310_LPS; DEG_GSE235310_Veh; DEG_GSE272113_CBD; DEG_GSE272113_sCBD; DEG_GSE274435_DMSO_24h
RAB3IL1	15	4	DEG_GSE168797_Mock_CBDV; DEG_GSE261716_CBD0.2_2d; DEG_GSE272113_CBD; DEG_GSE272113_sCBD	11	DEG_GSE131565; DEG_GSE151512_12h; DEG_GSE151512_24h; DEG_GSE151512_6h; DEG_GSE168797_Mock_CBD; DEG_GSE168797_SARS_CBD; DEG_GSE179661_HepG2; DEG_GSE179661_MHCC97H; DEG_GSE201508_cGAMP; DEG_GSE235310_LPS; DEG_GSE274859_LPS_24h
RGS2	15	12	DEG_GSE131565; DEG_GSE151512_12h; DEG_GSE151512_24h; DEG_GSE151512_6h; DEG_GSE168797_Mock_CBD; DEG_GSE168797_SARS_CBD; DEG_GSE168797_SARS_CBDV; DEG_GSE235310_LPS; DEG_GSE235310_Veh; DEG_GSE274435_DMSO_24h; DEG_GSE274435_DMSO_4h; DEG_GSE274435_EtOH_24h	3	DEG_GSE168797_Mock_CBDV; DEG_GSE179661_HepG2; DEG_GSE274859_LPS_24h
SLC6A9	15	2	DEG_GSE261716_CBD20_28d; DEG_GSE261716_CBD20_2d	13	DEG_GSE131565; DEG_GSE151512_12h; DEG_GSE151512_24h; DEG_GSE152088; DEG_GSE168797_Mock_CBD; DEG_GSE168797_SARS_CBD; DEG_GSE179661_HepG2; DEG_GSE179661_MHCC97H; DEG_GSE235310_Veh; DEG_GSE272113_sCBD; DEG_GSE274859_LPS_24h; GSE70689_CBD_NoLPS; GSE70689_CBD_wLPS
SLC7A5	15	5	DEG_GSE168797_Mock_CBD; DEG_GSE168797_Mock_CBDV; DEG_GSE168797_SARS_CBD; DEG_GSE179661_MHCC97H; DEG_GSE201508_enthanol	10	DEG_GSE151512_12h; DEG_GSE151512_24h; DEG_GSE151512_6h; DEG_GSE152088; DEG_GSE168797_SARS_CBDV; DEG_GSE179661_HepG2; DEG_GSE201508_cGAMP; DEG_GSE235310_LPS; DEG_GSE235310_Veh; GSE70689_CBD_wLPS
TMEM192	15	5	DEG_GSE131565; DEG_GSE152088; DEG_GSE179661_HepG2; DEG_GSE179661_MHCC97H; DEG_GSE232624_Veh_CBD3_12h	10	DEG_GSE151512_12h; DEG_GSE151512_24h; DEG_GSE151512_6h; DEG_GSE168797_Mock_CBD; DEG_GSE168797_SARS_CBD; DEG_GSE235310_LPS; DEG_GSE235310_Veh; DEG_GSE272113_CBD; DEG_GSE272113_sCBD; DEG_GSE274859_LPS_24h
TRAM1	15	5	DEG_GSE152088; DEG_GSE168797_Mock_CBD; DEG_GSE168797_SARS_CBD; DEG_GSE266113_WT; DEG_GSE270378_CBD0.75_24h	10	DEG_GSE131565; DEG_GSE151512_12h; DEG_GSE151512_24h; DEG_GSE151512_6h; DEG_GSE179661_MHCC97H; DEG_GSE201508_cGAMP; DEG_GSE235310_LPS; DEG_GSE272113_CBD; DEG_GSE272113_sCBD; DEG_GSE274859_LPS_24h
VEGFA	15	4	DEG_GSE151512_12h; DEG_GSE151512_24h; DEG_GSE151512_6h; DEG_GSE168797_SARS_CBDV	11	DEG_GSE131565; DEG_GSE168797_Mock_CBD; DEG_GSE179661_HepG2; DEG_GSE179661_MHCC97H; DEG_GSE232624_EtOH0.75_CBD0.75_6h; DEG_GSE235310_LPS; DEG_GSE235310_Veh; DEG_GSE272113_CBD; DEG_GSE272113_sCBD; GSE70689_CBD_NoLPS; GSE70689_CBD_wLPS
AARS1	14	0	NA	14	DEG_GSE131565; DEG_GSE151512_12h; DEG_GSE151512_24h; DEG_GSE151512_3h; DEG_GSE151512_6h; DEG_GSE168797_Mock_CBD; DEG_GSE168797_SARS_CBD; DEG_GSE168797_SARS_CBDV; DEG_GSE179661_HepG2; DEG_GSE179661_MHCC97H; DEG_GSE201508_cGAMP; DEG_GSE201508_enthanol; DEG_GSE235310_LPS; DEG_GSE235310_Veh
ACSL1	14	0	NA	14	DEG_GSE131565; DEG_GSE151512_12h; DEG_GSE151512_24h; DEG_GSE168797_Mock_CBD; DEG_GSE168797_SARS_CBD; DEG_GSE179661_HepG2; DEG_GSE201508_cGAMP; DEG_GSE201508_enthanol; DEG_GSE235310_LPS; DEG_GSE235310_Veh; DEG_GSE261716_CBD0.2_28d; DEG_GSE272113_CBD; DEG_GSE272113_sCBD; DEG_GSE274859_LPS_24h
ASAH1	14	4	DEG_GSE131565; DEG_GSE179661_HepG2; DEG_GSE179661_MHCC97H; DEG_GSE261716_CBD0.2_2d	10	DEG_GSE151512_24h; DEG_GSE168797_Mock_CBD; DEG_GSE168797_SARS_CBD; DEG_GSE168797_SARS_CBDV; DEG_GSE201508_cGAMP; DEG_GSE201508_enthanol; DEG_GSE235310_LPS; DEG_GSE235310_Veh; DEG_GSE272113_sCBD; DEG_GSE274859_LPS_24h
CD68	14	2	DEG_GSE168797_Mock_CBDV; DEG_GSE261716_CBD0.2_2d	12	DEG_GSE131565; DEG_GSE168797_Mock_CBD; DEG_GSE168797_SARS_CBD; DEG_GSE168797_SARS_CBDV; DEG_GSE179661_HepG2; DEG_GSE179661_MHCC97H; DEG_GSE201508_cGAMP; DEG_GSE201508_enthanol; DEG_GSE235310_LPS; DEG_GSE235310_Veh; DEG_GSE261716_CBD20_28d; DEG_GSE274859_LPS_24h
CDKN2C	14	12	DEG_GSE131565; DEG_GSE151512_12h; DEG_GSE151512_24h; DEG_GSE151512_6h; DEG_GSE168797_Mock_CBD; DEG_GSE168797_SARS_CBD; DEG_GSE179661_HepG2; DEG_GSE179661_MHCC97H; DEG_GSE201508_cGAMP; DEG_GSE235310_LPS; DEG_GSE235310_Veh; DEG_GSE274859_LPS_24h	2	DEG_GSE152088; DEG_GSE168797_Mock_CBDV
CLU	14	4	DEG_GSE151512_12h; DEG_GSE151512_24h; DEG_GSE179661_HepG2; DEG_GSE179661_MHCC97H	10	DEG_GSE131565; DEG_GSE168797_Mock_CBD; DEG_GSE168797_SARS_CBD; DEG_GSE201508_cGAMP; DEG_GSE201508_enthanol; DEG_GSE232624_EtOH0.75_CBD0.75_6h; DEG_GSE235310_LPS; DEG_GSE235310_Veh; DEG_GSE270378_CBD0.75_24h; DEG_GSE274859_LPS_24h
CPPED1	14	9	DEG_GSE131565; DEG_GSE151512_12h; DEG_GSE151512_24h; DEG_GSE179661_HepG2; DEG_GSE201508_cGAMP; DEG_GSE235310_LPS; DEG_GSE235310_Veh; DEG_GSE272113_CBD; DEG_GSE272113_sCBD	5	DEG_GSE168797_Mock_CBD; DEG_GSE168797_SARS_CBD; DEG_GSE168797_SARS_CBDV; DEG_GSE179661_MHCC97H; DEG_GSE261716_CBD20_28d
CREG1	14	2	DEG_GSE179661_HepG2; DEG_GSE179661_MHCC97H	12	DEG_GSE131565; DEG_GSE151512_24h; DEG_GSE168797_Mock_CBD; DEG_GSE168797_SARS_CBD; DEG_GSE168797_SARS_CBDV; DEG_GSE201508_cGAMP; DEG_GSE201508_enthanol; DEG_GSE235310_Veh; DEG_GSE261716_CBD0.2_2d; DEG_GSE272113_CBD; DEG_GSE272113_sCBD; DEG_GSE274859_LPS_24h
DNMT1	14	11	DEG_GSE131565; DEG_GSE151512_24h; DEG_GSE168797_Mock_CBD; DEG_GSE168797_SARS_CBD; DEG_GSE179661_HepG2; DEG_GSE179661_MHCC97H; DEG_GSE232624_EtOH0.25_CBD0.75_6h; DEG_GSE235310_Veh; DEG_GSE261716_CBD0.2_28d; DEG_GSE261716_CBD20_28d; DEG_GSE274859_LPS_24h	3	DEG_GSE201508_cGAMP; DEG_GSE232624_Veh_CBD3_6h; DEG_GSE272113_CBD
DUSP1	14	4	DEG_GSE151512_6h; DEG_GSE168797_SARS_CBD; DEG_GSE168797_SARS_CBDV; DEG_GSE235310_LPS	10	DEG_GSE131565; DEG_GSE152088; DEG_GSE168797_Mock_CBD; DEG_GSE179661_HepG2; DEG_GSE179661_MHCC97H; DEG_GSE270378_CBD0.325_24h; DEG_GSE270378_CBD0.75_24h; DEG_GSE270378_CBD1.5_24h; DEG_GSE272113_sCBD; DEG_GSE274859_LPS_24h
EIF1	14	0	NA	14	DEG_GSE131565; DEG_GSE151512_12h; DEG_GSE151512_24h; DEG_GSE151512_6h; DEG_GSE168797_Mock_CBD; DEG_GSE168797_SARS_CBD; DEG_GSE168797_SARS_CBDV; DEG_GSE179661_HepG2; DEG_GSE179661_MHCC97H; DEG_GSE201508_cGAMP; DEG_GSE235310_Veh; DEG_GSE261716_CBD0.2_2d; DEG_GSE261716_CBD20_2d; DEG_GSE274859_LPS_24h
ETV5	14	2	DEG_GSE152088; GSE70689_CBD_NoLPS	12	DEG_GSE131565; DEG_GSE151512_12h; DEG_GSE151512_24h; DEG_GSE151512_6h; DEG_GSE168797_Mock_CBD; DEG_GSE168797_SARS_CBD; DEG_GSE168797_SARS_CBDV; DEG_GSE179661_MHCC97H; DEG_GSE201508_cGAMP; DEG_GSE235310_LPS; DEG_GSE272113_CBD; DEG_GSE272113_sCBD
FADS2	14	9	DEG_GSE131565; DEG_GSE151512_6h; DEG_GSE168797_Mock_CBD; DEG_GSE168797_SARS_CBD; DEG_GSE179661_HepG2; DEG_GSE179661_MHCC97H; DEG_GSE235310_LPS; DEG_GSE235310_Veh; DEG_GSE274859_LPS_24h	5	DEG_GSE151512_12h; DEG_GSE151512_24h; DEG_GSE168797_SARS_CBDV; DEG_GSE201508_cGAMP; DEG_GSE201508_enthanol
FN1	14	10	DEG_GSE131565; DEG_GSE168797_Mock_CBD; DEG_GSE168797_SARS_CBD; DEG_GSE179661_HepG2; DEG_GSE179661_MHCC97H; DEG_GSE232624_EtOH0.25_CBD0.75_6h; DEG_GSE232624_EtOH0.75_CBD0.75_6h; DEG_GSE261716_CBD10_28d; DEG_GSE272113_CBD; DEG_GSE272113_sCBD	4	DEG_GSE168797_Mock_CBDV; DEG_GSE232624_EtOH0.75_CBD0.75_12h; DEG_GSE235310_LPS; DEG_GSE274435_EtOH_24h
GADD45A	14	4	DEG_GSE168797_SARS_CBDV; DEG_GSE235310_LPS; DEG_GSE235310_Veh; DEG_GSE272113_CBD	10	DEG_GSE131565; DEG_GSE151512_3h; DEG_GSE151512_6h; DEG_GSE152088; DEG_GSE168797_Mock_CBD; DEG_GSE168797_SARS_CBD; DEG_GSE179661_HepG2; DEG_GSE179661_MHCC97H; DEG_GSE261716_CBD20_2d; DEG_GSE274859_LPS_24h
HEXIM1	14	12	DEG_GSE151512_12h; DEG_GSE151512_24h; DEG_GSE151512_6h; DEG_GSE168797_Mock_CBD; DEG_GSE168797_SARS_CBD; DEG_GSE168797_SARS_CBDV; DEG_GSE201508_cGAMP; DEG_GSE201508_enthanol; DEG_GSE235310_LPS; DEG_GSE235310_Veh; DEG_GSE261716_CBD0.2_28d; DEG_GSE261716_CBD20_28d	2	DEG_GSE152088; DEG_GSE168797_Mock_CBDV
KDSR	14	1	DEG_GSE168797_Mock_CBDV	13	DEG_GSE131565; DEG_GSE151512_12h; DEG_GSE151512_24h; DEG_GSE168797_Mock_CBD; DEG_GSE168797_SARS_CBD; DEG_GSE179661_HepG2; DEG_GSE179661_MHCC97H; DEG_GSE201508_cGAMP; DEG_GSE201508_enthanol; DEG_GSE235310_LPS; DEG_GSE235310_Veh; DEG_GSE272113_sCBD; DEG_GSE274859_LPS_24h
KLF4	14	4	DEG_GSE201508_cGAMP; DEG_GSE201508_enthanol; DEG_GSE261716_CBD0.2_2d; DEG_GSE266113_mutNdufs4	10	DEG_GSE131565; DEG_GSE152088; DEG_GSE168797_Mock_CBD; DEG_GSE168797_SARS_CBD; DEG_GSE179661_HepG2; DEG_GSE179661_MHCC97H; DEG_GSE261716_CBD20_28d; DEG_GSE274435_EtOH_24h; DEG_GSE274859_LPS_24h; GSE70689_CBD_wLPS
LDLR	14	6	DEG_GSE168797_SARS_CBD; DEG_GSE168797_SARS_CBDV; DEG_GSE179661_MHCC97H; DEG_GSE261716_CBD0.2_28d; DEG_GSE266113_WT; DEG_GSE274859_LPS_24h	8	DEG_GSE151512_12h; DEG_GSE151512_24h; DEG_GSE151512_6h; DEG_GSE179661_HepG2; DEG_GSE201508_cGAMP; DEG_GSE201508_enthanol; DEG_GSE272113_CBD; DEG_GSE272113_sCBD
MAFG	14	1	DEG_GSE168797_Mock_CBDV	13	DEG_GSE131565; DEG_GSE151512_12h; DEG_GSE151512_24h; DEG_GSE151512_6h; DEG_GSE152088; DEG_GSE168797_Mock_CBD; DEG_GSE179661_HepG2; DEG_GSE201508_cGAMP; DEG_GSE235310_LPS; DEG_GSE235310_Veh; DEG_GSE272113_CBD; DEG_GSE272113_sCBD; GSE70689_CBD_wLPS
MAP2K6	14	9	DEG_GSE151512_12h; DEG_GSE151512_24h; DEG_GSE151512_6h; DEG_GSE168797_Mock_CBD; DEG_GSE179661_HepG2; DEG_GSE179661_MHCC97H; DEG_GSE201508_cGAMP; DEG_GSE266113_WT; DEG_GSE274859_LPS_24h	5	DEG_GSE131565; DEG_GSE168797_Mock_CBDV; DEG_GSE235310_LPS; DEG_GSE235310_Veh; DEG_GSE261716_CBD0.2_28d
MICAL2	14	12	DEG_GSE131565; DEG_GSE168797_Mock_CBD; DEG_GSE168797_SARS_CBD; DEG_GSE179661_MHCC97H; DEG_GSE201508_enthanol; DEG_GSE261716_CBD0.2_28d; DEG_GSE261716_CBD10_28d; DEG_GSE261716_CBD20_28d; DEG_GSE272113_sCBD; DEG_GSE274435_DMSO_24h; DEG_GSE274435_EtOH_24h; DEG_GSE275998_CDB10	2	DEG_GSE151512_24h; DEG_GSE179661_HepG2
MT1F	14	0	NA	14	DEG_GSE131565; DEG_GSE151512_12h; DEG_GSE151512_24h; DEG_GSE151512_3h; DEG_GSE151512_6h; DEG_GSE168797_Mock_CBD; DEG_GSE168797_SARS_CBD; DEG_GSE168797_SARS_CBDV; DEG_GSE179661_HepG2; DEG_GSE179661_MHCC97H; DEG_GSE201508_cGAMP; DEG_GSE201508_enthanol; DEG_GSE235310_LPS; DEG_GSE235310_Veh
MVK	14	5	DEG_GSE179661_MHCC97H; DEG_GSE235310_LPS; DEG_GSE235310_Veh; DEG_GSE274435_DMSO_24h; DEG_GSE274859_LPS_24h	9	DEG_GSE151512_12h; DEG_GSE151512_24h; DEG_GSE151512_6h; DEG_GSE168797_Mock_CBDV; DEG_GSE179661_HepG2; DEG_GSE201508_cGAMP; DEG_GSE201508_enthanol; DEG_GSE272113_CBD; DEG_GSE272113_sCBD
MYD88	14	9	DEG_GSE131565; DEG_GSE151512_12h; DEG_GSE151512_24h; DEG_GSE151512_6h; DEG_GSE179661_HepG2; DEG_GSE179661_MHCC97H; DEG_GSE201508_cGAMP; DEG_GSE266113_WT; DEG_GSE274859_LPS_24h	5	DEG_GSE168797_SARS_CBD; DEG_GSE235310_LPS; DEG_GSE235310_Veh; DEG_GSE272113_CBD; DEG_GSE272113_sCBD
NAMPT	14	1	DEG_GSE152088	13	DEG_GSE131565; DEG_GSE151512_12h; DEG_GSE151512_24h; DEG_GSE151512_6h; DEG_GSE168797_Mock_CBD; DEG_GSE168797_SARS_CBD; DEG_GSE179661_HepG2; DEG_GSE179661_MHCC97H; DEG_GSE235310_LPS; DEG_GSE261716_CBD20_28d; DEG_GSE272113_CBD; DEG_GSE272113_sCBD; DEG_GSE274859_LPS_24h
NUPR1	14	0	NA	14	DEG_GSE131565; DEG_GSE151512_12h; DEG_GSE151512_24h; DEG_GSE151512_6h; DEG_GSE152088; DEG_GSE168797_Mock_CBD; DEG_GSE168797_SARS_CBD; DEG_GSE179661_HepG2; DEG_GSE179661_MHCC97H; DEG_GSE201508_cGAMP; DEG_GSE235310_LPS; DEG_GSE235310_Veh; DEG_GSE274859_LPS_24h; GSE70689_CBD_NoLPS
PDIA6	14	4	DEG_GSE151512_12h; DEG_GSE151512_24h; DEG_GSE261716_CBD10_28d; DEG_GSE261716_CBD20_28d	10	DEG_GSE131565; DEG_GSE168797_Mock_CBD; DEG_GSE168797_SARS_CBD; DEG_GSE201508_cGAMP; DEG_GSE201508_enthanol; DEG_GSE235310_LPS; DEG_GSE272113_CBD; DEG_GSE272113_sCBD; DEG_GSE274435_DMSO_24h; DEG_GSE274859_LPS_24h
PGAM1	14	11	DEG_GSE131565; DEG_GSE151512_12h; DEG_GSE151512_24h; DEG_GSE151512_6h; DEG_GSE168797_Mock_CBD; DEG_GSE168797_SARS_CBD; DEG_GSE179661_MHCC97H; DEG_GSE201508_cGAMP; DEG_GSE235310_LPS; DEG_GSE274435_DMSO_24h; DEG_GSE274859_LPS_24h	3	DEG_GSE232624_EtOH0.75_CBD0.75_6h; DEG_GSE272113_CBD; DEG_GSE272113_sCBD
PHLDA1	14	4	DEG_GSE152088; DEG_GSE168797_Mock_CBDV; DEG_GSE179661_MHCC97H; DEG_GSE274859_LPS_24h	10	DEG_GSE151512_24h; DEG_GSE168797_Mock_CBD; DEG_GSE168797_SARS_CBD; DEG_GSE179661_HepG2; DEG_GSE201508_cGAMP; DEG_GSE201508_enthanol; DEG_GSE235310_LPS; DEG_GSE235310_Veh; DEG_GSE261716_CBD0.2_2d; DEG_GSE266113_mutNdufs4
PI4K2A	14	1	DEG_GSE168797_Mock_CBDV	13	DEG_GSE131565; DEG_GSE151512_12h; DEG_GSE151512_6h; DEG_GSE168797_Mock_CBD; DEG_GSE168797_SARS_CBD; DEG_GSE179661_HepG2; DEG_GSE179661_MHCC97H; DEG_GSE201508_cGAMP; DEG_GSE201508_enthanol; DEG_GSE235310_Veh; DEG_GSE272113_CBD; DEG_GSE272113_sCBD; DEG_GSE274859_LPS_24h
PNRC1	14	8	DEG_GSE151512_12h; DEG_GSE151512_24h; DEG_GSE151512_6h; DEG_GSE168797_SARS_CBDV; DEG_GSE261716_CBD10_28d; DEG_GSE261716_CBD20_28d; DEG_GSE261716_CBD20_2d; DEG_GSE266113_WT	6	DEG_GSE131565; DEG_GSE168797_Mock_CBD; DEG_GSE179661_HepG2; DEG_GSE179661_MHCC97H; DEG_GSE201508_cGAMP; DEG_GSE272113_sCBD
POR	14	0	NA	14	DEG_GSE131565; DEG_GSE151512_24h; DEG_GSE168797_Mock_CBD; DEG_GSE168797_SARS_CBD; DEG_GSE168797_SARS_CBDV; DEG_GSE179661_HepG2; DEG_GSE179661_MHCC97H; DEG_GSE201508_cGAMP; DEG_GSE201508_enthanol; DEG_GSE235310_Veh; DEG_GSE261716_CBD0.2_28d; DEG_GSE272113_CBD; DEG_GSE272113_sCBD; DEG_GSE274859_LPS_24h
PPP1R3C	14	13	DEG_GSE131565; DEG_GSE151512_12h; DEG_GSE151512_24h; DEG_GSE151512_6h; DEG_GSE168797_Mock_CBD; DEG_GSE168797_SARS_CBD; DEG_GSE168797_SARS_CBDV; DEG_GSE179661_HepG2; DEG_GSE261716_CBD0.2_28d; DEG_GSE261716_CBD10_28d; DEG_GSE261716_CBD10_2d; DEG_GSE261716_CBD20_28d; DEG_GSE261716_CBD20_2d	1	DEG_GSE168797_Mock_CBDV
PSAP	14	1	DEG_GSE261716_CBD20_28d	13	DEG_GSE131565; DEG_GSE151512_24h; DEG_GSE168797_Mock_CBD; DEG_GSE168797_SARS_CBD; DEG_GSE168797_SARS_CBDV; DEG_GSE179661_HepG2; DEG_GSE179661_MHCC97H; DEG_GSE201508_cGAMP; DEG_GSE235310_LPS; DEG_GSE235310_Veh; DEG_GSE272113_CBD; DEG_GSE272113_sCBD; DEG_GSE274859_LPS_24h
RIPK2	14	1	DEG_GSE152088	13	DEG_GSE131565; DEG_GSE151512_12h; DEG_GSE151512_24h; DEG_GSE168797_Mock_CBD; DEG_GSE168797_SARS_CBD; DEG_GSE179661_HepG2; DEG_GSE179661_MHCC97H; DEG_GSE235310_LPS; DEG_GSE235310_Veh; DEG_GSE261716_CBD20_28d; DEG_GSE266113_WT; DEG_GSE272113_CBD; DEG_GSE272113_sCBD
SDF2L1	14	0	NA	14	DEG_GSE131565; DEG_GSE168797_Mock_CBD; DEG_GSE168797_SARS_CBD; DEG_GSE179661_HepG2; DEG_GSE179661_MHCC97H; DEG_GSE201508_cGAMP; DEG_GSE201508_enthanol; DEG_GSE235310_LPS; DEG_GSE272113_CBD; DEG_GSE272113_sCBD; DEG_GSE274435_DMSO_24h; DEG_GSE274435_DMSO_4h; DEG_GSE274435_EtOH_24h; DEG_GSE274435_EtOH_4h
SERINC2	14	4	DEG_GSE232624_EtOH0.75_CBD0.75_12h; DEG_GSE272113_CBD; DEG_GSE272113_sCBD; DEG_GSE274859_LPS_24h	10	DEG_GSE131565; DEG_GSE151512_12h; DEG_GSE151512_24h; DEG_GSE168797_Mock_CBD; DEG_GSE168797_SARS_CBD; DEG_GSE168797_SARS_CBDV; DEG_GSE179661_HepG2; DEG_GSE179661_MHCC97H; DEG_GSE235310_LPS; DEG_GSE235310_Veh
SGK1	14	5	DEG_GSE131565; DEG_GSE168797_Mock_CBD; DEG_GSE168797_SARS_CBD; DEG_GSE168797_SARS_CBDV; DEG_GSE261716_CBD0.2_2d	9	DEG_GSE151512_12h; DEG_GSE151512_24h; DEG_GSE151512_3h; DEG_GSE151512_6h; DEG_GSE201508_cGAMP; DEG_GSE235310_LPS; DEG_GSE235310_Veh; DEG_GSE272113_CBD; DEG_GSE272113_sCBD
SLC17A5	14	1	DEG_GSE261716_CBD0.2_2d	13	DEG_GSE131565; DEG_GSE151512_24h; DEG_GSE168797_Mock_CBD; DEG_GSE168797_SARS_CBD; DEG_GSE168797_SARS_CBDV; DEG_GSE201508_cGAMP; DEG_GSE201508_enthanol; DEG_GSE232624_EtOH0.25_CBD0.75_12h; DEG_GSE235310_LPS; DEG_GSE235310_Veh; DEG_GSE272113_CBD; DEG_GSE272113_sCBD; DEG_GSE274859_LPS_24h
SORT1	14	9	DEG_GSE151512_12h; DEG_GSE151512_24h; DEG_GSE168797_Mock_CBD; DEG_GSE168797_SARS_CBD; DEG_GSE179661_HepG2; DEG_GSE261716_CBD0.2_28d; DEG_GSE261716_CBD20_2d; DEG_GSE272113_CBD; DEG_GSE272113_sCBD	5	DEG_GSE131565; DEG_GSE168797_SARS_CBDV; DEG_GSE232624_EtOH0.75_CBD0.75_12h; DEG_GSE235310_LPS; DEG_GSE235310_Veh
SQLE	14	4	DEG_GSE179661_HepG2; DEG_GSE235310_LPS; DEG_GSE235310_Veh; DEG_GSE274859_LPS_24h	10	DEG_GSE151512_12h; DEG_GSE151512_24h; DEG_GSE151512_6h; DEG_GSE168797_Mock_CBD; DEG_GSE168797_Mock_CBDV; DEG_GSE168797_SARS_CBD; DEG_GSE201508_cGAMP; DEG_GSE201508_enthanol; DEG_GSE272113_CBD; DEG_GSE272113_sCBD
SRSF7	14	13	DEG_GSE131565; DEG_GSE151512_12h; DEG_GSE151512_24h; DEG_GSE151512_6h; DEG_GSE168797_Mock_CBD; DEG_GSE168797_SARS_CBD; DEG_GSE179661_HepG2; DEG_GSE179661_MHCC97H; DEG_GSE201508_cGAMP; DEG_GSE201508_enthanol; DEG_GSE235310_LPS; DEG_GSE235310_Veh; DEG_GSE274859_LPS_24h	1	DEG_GSE261716_CBD20_2d
SRXN1	14	1	DEG_GSE179661_MHCC97H	13	DEG_GSE131565; DEG_GSE151512_24h; DEG_GSE168797_Mock_CBD; DEG_GSE168797_SARS_CBD; DEG_GSE179661_HepG2; DEG_GSE235310_LPS; DEG_GSE235310_Veh; DEG_GSE261716_CBD0.2_28d; DEG_GSE261716_CBD10_28d; DEG_GSE261716_CBD20_28d; DEG_GSE272113_CBD; DEG_GSE272113_sCBD; DEG_GSE274859_LPS_24h
SSR3	14	1	DEG_GSE235310_LPS	13	DEG_GSE131565; DEG_GSE151512_12h; DEG_GSE151512_24h; DEG_GSE168797_Mock_CBD; DEG_GSE168797_SARS_CBD; DEG_GSE168797_SARS_CBDV; DEG_GSE179661_HepG2; DEG_GSE179661_MHCC97H; DEG_GSE201508_cGAMP; DEG_GSE201508_enthanol; DEG_GSE272113_CBD; DEG_GSE272113_sCBD; DEG_GSE274859_LPS_24h
STARD4	14	3	DEG_GSE179661_HepG2; DEG_GSE235310_LPS; DEG_GSE274859_LPS_24h	11	DEG_GSE131565; DEG_GSE151512_12h; DEG_GSE151512_24h; DEG_GSE151512_6h; DEG_GSE168797_Mock_CBD; DEG_GSE168797_Mock_CBDV; DEG_GSE168797_SARS_CBD; DEG_GSE201508_cGAMP; DEG_GSE201508_enthanol; DEG_GSE272113_CBD; DEG_GSE272113_sCBD
TNFRSF21	14	6	DEG_GSE131565; DEG_GSE168797_Mock_CBDV; DEG_GSE179661_MHCC97H; DEG_GSE201508_cGAMP; DEG_GSE201508_enthanol; DEG_GSE261716_CBD0.2_2d	8	DEG_GSE151512_12h; DEG_GSE151512_24h; DEG_GSE168797_Mock_CBD; DEG_GSE168797_SARS_CBD; DEG_GSE168797_SARS_CBDV; DEG_GSE179661_HepG2; DEG_GSE235310_LPS; DEG_GSE235310_Veh
TRERF1	14	8	DEG_GSE131565; DEG_GSE151512_12h; DEG_GSE151512_24h; DEG_GSE151512_3h; DEG_GSE151512_6h; DEG_GSE168797_Mock_CBD; DEG_GSE168797_SARS_CBD; DEG_GSE179661_MHCC97H	6	DEG_GSE179661_HepG2; DEG_GSE201508_cGAMP; DEG_GSE201508_enthanol; DEG_GSE235310_LPS; DEG_GSE272113_CBD; DEG_GSE274435_DMSO_4h
TXNIP	14	10	DEG_GSE151512_12h; DEG_GSE151512_24h; DEG_GSE151512_3h; DEG_GSE151512_6h; DEG_GSE168797_SARS_CBDV; DEG_GSE179661_HepG2; DEG_GSE201508_cGAMP; DEG_GSE201508_enthanol; DEG_GSE235310_LPS; DEG_GSE235310_Veh	4	DEG_GSE131565; DEG_GSE152088; DEG_GSE179661_MHCC97H; DEG_GSE261716_CBD0.2_28d
VAT1	14	2	DEG_GSE168797_Mock_CBDV; DEG_GSE261716_CBD20_2d	12	DEG_GSE151512_24h; DEG_GSE168797_Mock_CBD; DEG_GSE168797_SARS_CBD; DEG_GSE168797_SARS_CBDV; DEG_GSE179661_HepG2; DEG_GSE179661_MHCC97H; DEG_GSE201508_enthanol; DEG_GSE235310_LPS; DEG_GSE235310_Veh; DEG_GSE272113_CBD; DEG_GSE272113_sCBD; DEG_GSE274859_LPS_24h
WBP2	14	0	NA	14	DEG_GSE131565; DEG_GSE151512_12h; DEG_GSE151512_24h; DEG_GSE168797_Mock_CBD; DEG_GSE168797_SARS_CBD; DEG_GSE168797_SARS_CBDV; DEG_GSE179661_HepG2; DEG_GSE179661_MHCC97H; DEG_GSE201508_cGAMP; DEG_GSE201508_enthanol; DEG_GSE235310_Veh; DEG_GSE272113_CBD; DEG_GSE272113_sCBD; DEG_GSE274859_LPS_24h
ATF5	13	4	DEG_GSE168797_Mock_CBD; DEG_GSE168797_SARS_CBD; DEG_GSE235310_LPS; DEG_GSE235310_Veh	9	DEG_GSE131565; DEG_GSE151512_24h; DEG_GSE179661_HepG2; DEG_GSE179661_MHCC97H; DEG_GSE272113_CBD; DEG_GSE272113_sCBD; DEG_GSE274859_LPS_24h; GSE70689_CBD_NoLPS; GSE70689_CBD_wLPS
ATP2B1	13	6	DEG_GSE152088; DEG_GSE179661_MHCC97H; DEG_GSE235310_LPS; DEG_GSE235310_Veh; DEG_GSE261716_CBD10_28d; DEG_GSE261716_CBD20_28d	7	DEG_GSE131565; DEG_GSE151512_24h; DEG_GSE151512_6h; DEG_GSE201508_cGAMP; DEG_GSE272113_CBD; DEG_GSE272113_sCBD; DEG_GSE274859_LPS_24h
ATP2B4	13	6	DEG_GSE179661_HepG2; DEG_GSE235310_LPS; DEG_GSE272113_CBD; DEG_GSE274435_DMSO_24h; DEG_GSE274435_EtOH_24h; DEG_GSE274859_LPS_24h	7	DEG_GSE131565; DEG_GSE151512_12h; DEG_GSE151512_24h; DEG_GSE168797_Mock_CBD; DEG_GSE168797_SARS_CBD; DEG_GSE179661_MHCC97H; DEG_GSE201508_cGAMP
BAIAP2	13	7	DEG_GSE151512_6h; DEG_GSE168797_Mock_CBDV; DEG_GSE261716_CBD20_28d; DEG_GSE272113_CBD; DEG_GSE272113_sCBD; DEG_GSE274435_DMSO_24h; DEG_GSE274435_EtOH_24h	6	DEG_GSE168797_Mock_CBD; DEG_GSE168797_SARS_CBD; DEG_GSE179661_HepG2; DEG_GSE179661_MHCC97H; DEG_GSE235310_LPS; DEG_GSE274859_LPS_24h
BEST1	13	2	DEG_GSE272113_CBD; DEG_GSE272113_sCBD	11	DEG_GSE131565; DEG_GSE151512_12h; DEG_GSE151512_24h; DEG_GSE151512_6h; DEG_GSE168797_Mock_CBD; DEG_GSE168797_SARS_CBD; DEG_GSE179661_HepG2; DEG_GSE179661_MHCC97H; DEG_GSE201508_cGAMP; DEG_GSE235310_LPS; DEG_GSE235310_Veh
BNIP3	13	4	DEG_GSE151512_12h; DEG_GSE151512_24h; DEG_GSE151512_6h; DEG_GSE274859_LPS_24h	9	DEG_GSE131565; DEG_GSE179661_MHCC97H; DEG_GSE235310_LPS; DEG_GSE261716_CBD0.2_28d; DEG_GSE261716_CBD10_28d; DEG_GSE261716_CBD20_28d; DEG_GSE261716_CBD20_2d; DEG_GSE272113_CBD; DEG_GSE272113_sCBD
CALCOCO1	13	3	DEG_GSE151512_12h; DEG_GSE151512_24h; DEG_GSE266113_WT	10	DEG_GSE131565; DEG_GSE152088; DEG_GSE168797_Mock_CBD; DEG_GSE168797_SARS_CBD; DEG_GSE179661_HepG2; DEG_GSE179661_MHCC97H; DEG_GSE201508_cGAMP; DEG_GSE235310_LPS; DEG_GSE235310_Veh; DEG_GSE274859_LPS_24h
CCNG1	13	6	DEG_GSE152088; DEG_GSE179661_HepG2; DEG_GSE235310_LPS; DEG_GSE272113_CBD; DEG_GSE272113_sCBD; DEG_GSE274859_LPS_24h	7	DEG_GSE151512_24h; DEG_GSE151512_6h; DEG_GSE168797_SARS_CBD; DEG_GSE179661_MHCC97H; DEG_GSE201508_cGAMP; DEG_GSE201508_enthanol; DEG_GSE261716_CBD20_28d
CCNG2	13	5	DEG_GSE151512_24h; DEG_GSE235310_LPS; DEG_GSE235310_Veh; DEG_GSE266113_WT; DEG_GSE274859_LPS_24h	8	DEG_GSE131565; DEG_GSE168797_Mock_CBD; DEG_GSE168797_SARS_CBD; DEG_GSE179661_HepG2; DEG_GSE179661_MHCC97H; DEG_GSE201508_cGAMP; DEG_GSE201508_enthanol; GSE70689_CBD_NoLPS
CHST14	13	13	DEG_GSE131565; DEG_GSE151512_12h; DEG_GSE151512_24h; DEG_GSE151512_6h; DEG_GSE168797_Mock_CBD; DEG_GSE168797_Mock_CBDV; DEG_GSE168797_SARS_CBD; DEG_GSE179661_HepG2; DEG_GSE179661_MHCC97H; DEG_GSE201508_cGAMP; DEG_GSE235310_LPS; DEG_GSE235310_Veh; DEG_GSE274859_LPS_24h	0	NA
CLDN12	13	0	NA	13	DEG_GSE131565; DEG_GSE151512_24h; DEG_GSE168797_Mock_CBD; DEG_GSE168797_SARS_CBD; DEG_GSE179661_MHCC97H; DEG_GSE201508_cGAMP; DEG_GSE235310_LPS; DEG_GSE235310_Veh; DEG_GSE272113_CBD; DEG_GSE272113_sCBD; DEG_GSE274859_LPS_24h; GSE70689_CBD_NoLPS; GSE70689_CBD_wLPS
CNPPD1	13	4	DEG_GSE151512_24h; DEG_GSE201508_cGAMP; DEG_GSE201508_enthanol; DEG_GSE235310_LPS	9	DEG_GSE131565; DEG_GSE168797_Mock_CBD; DEG_GSE168797_SARS_CBD; DEG_GSE179661_HepG2; DEG_GSE179661_MHCC97H; DEG_GSE232624_Veh_CBD3_12h; DEG_GSE272113_CBD; DEG_GSE272113_sCBD; DEG_GSE274859_LPS_24h
CREB5	13	5	DEG_GSE151512_12h; DEG_GSE151512_6h; DEG_GSE168797_SARS_CBDV; DEG_GSE235310_Veh; DEG_GSE261716_CBD20_28d	8	DEG_GSE131565; DEG_GSE168797_Mock_CBD; DEG_GSE168797_SARS_CBD; DEG_GSE179661_HepG2; DEG_GSE179661_MHCC97H; DEG_GSE261716_CBD0.2_2d; DEG_GSE272113_CBD; DEG_GSE272113_sCBD
CRY1	13	7	DEG_GSE168797_Mock_CBD; DEG_GSE168797_SARS_CBD; DEG_GSE261716_CBD10_28d; DEG_GSE261716_CBD20_28d; DEG_GSE261716_CBD20_2d; DEG_GSE274859_LPS_24h; DEG_GSE275998_CDB20	6	DEG_GSE151512_12h; DEG_GSE151512_24h; DEG_GSE151512_6h; DEG_GSE179661_MHCC97H; DEG_GSE201508_cGAMP; DEG_GSE235310_Veh
CSRNP1	13	5	DEG_GSE168797_SARS_CBD; DEG_GSE168797_SARS_CBDV; DEG_GSE201508_cGAMP; DEG_GSE235310_LPS; DEG_GSE266113_mutNdufs4	8	DEG_GSE131565; DEG_GSE151512_24h; DEG_GSE168797_Mock_CBD; DEG_GSE179661_HepG2; DEG_GSE179661_MHCC97H; DEG_GSE272113_CBD; DEG_GSE272113_sCBD; DEG_GSE274859_LPS_24h
CSRP1	13	2	DEG_GSE168797_Mock_CBD; DEG_GSE235310_LPS	11	DEG_GSE131565; DEG_GSE151512_12h; DEG_GSE151512_3h; DEG_GSE151512_6h; DEG_GSE179661_HepG2; DEG_GSE179661_MHCC97H; DEG_GSE201508_cGAMP; DEG_GSE201508_enthanol; DEG_GSE274435_DMSO_24h; DEG_GSE274435_EtOH_24h; DEG_GSE274859_LPS_24h
CSTB	13	0	NA	13	DEG_GSE131565; DEG_GSE168797_Mock_CBD; DEG_GSE168797_SARS_CBD; DEG_GSE168797_SARS_CBDV; DEG_GSE179661_MHCC97H; DEG_GSE201508_cGAMP; DEG_GSE201508_enthanol; DEG_GSE235310_LPS; DEG_GSE235310_Veh; DEG_GSE261716_CBD20_28d; DEG_GSE261716_CBD20_2d; DEG_GSE272113_sCBD; DEG_GSE274859_LPS_24h
CTSA	13	3	DEG_GSE151512_24h; DEG_GSE151512_6h; DEG_GSE179661_MHCC97H	10	DEG_GSE131565; DEG_GSE152088; DEG_GSE168797_Mock_CBD; DEG_GSE168797_SARS_CBD; DEG_GSE201508_cGAMP; DEG_GSE235310_LPS; DEG_GSE235310_Veh; DEG_GSE272113_CBD; DEG_GSE272113_sCBD; DEG_GSE274859_LPS_24h
CYSTM1	13	0	NA	13	DEG_GSE131565; DEG_GSE151512_12h; DEG_GSE151512_24h; DEG_GSE151512_6h; DEG_GSE168797_Mock_CBD; DEG_GSE168797_SARS_CBD; DEG_GSE179661_HepG2; DEG_GSE179661_MHCC97H; DEG_GSE201508_cGAMP; DEG_GSE201508_enthanol; DEG_GSE235310_LPS; DEG_GSE235310_Veh; DEG_GSE261716_CBD20_28d
EIF2A	13	1	DEG_GSE274859_LPS_24h	12	DEG_GSE131565; DEG_GSE151512_12h; DEG_GSE151512_24h; DEG_GSE151512_6h; DEG_GSE168797_Mock_CBD; DEG_GSE168797_SARS_CBD; DEG_GSE179661_HepG2; DEG_GSE179661_MHCC97H; DEG_GSE201508_cGAMP; DEG_GSE201508_enthanol; DEG_GSE235310_LPS; DEG_GSE261716_CBD20_28d
EIF2S2	13	2	DEG_GSE152088; DEG_GSE179661_HepG2	11	DEG_GSE131565; DEG_GSE151512_12h; DEG_GSE151512_24h; DEG_GSE151512_3h; DEG_GSE151512_6h; DEG_GSE168797_Mock_CBD; DEG_GSE168797_SARS_CBD; DEG_GSE179661_MHCC97H; DEG_GSE235310_LPS; DEG_GSE235310_Veh; DEG_GSE274859_LPS_24h
FBXO32	13	1	DEG_GSE272113_sCBD	12	DEG_GSE131565; DEG_GSE151512_12h; DEG_GSE151512_24h; DEG_GSE152088; DEG_GSE168797_Mock_CBD; DEG_GSE168797_SARS_CBD; DEG_GSE179661_HepG2; DEG_GSE179661_MHCC97H; DEG_GSE201508_cGAMP; DEG_GSE232624_EtOH0.75_CBD0.75_12h; DEG_GSE235310_Veh; DEG_GSE274859_LPS_24h
FNIP1	13	1	DEG_GSE168797_Mock_CBDV	12	DEG_GSE131565; DEG_GSE151512_12h; DEG_GSE151512_24h; DEG_GSE168797_Mock_CBD; DEG_GSE179661_HepG2; DEG_GSE179661_MHCC97H; DEG_GSE201508_cGAMP; DEG_GSE201508_enthanol; DEG_GSE235310_LPS; DEG_GSE235310_Veh; DEG_GSE272113_CBD; DEG_GSE274859_LPS_24h
FNIP2	13	3	DEG_GSE179661_HepG2; DEG_GSE261716_CBD0.2_28d; DEG_GSE261716_CBD0.2_2d	10	DEG_GSE131565; DEG_GSE168797_Mock_CBD; DEG_GSE168797_SARS_CBD; DEG_GSE179661_MHCC97H; DEG_GSE201508_cGAMP; DEG_GSE201508_enthanol; DEG_GSE235310_LPS; DEG_GSE272113_CBD; DEG_GSE272113_sCBD; DEG_GSE274859_LPS_24h
GCLC	13	0	NA	13	DEG_GSE131565; DEG_GSE151512_12h; DEG_GSE151512_24h; DEG_GSE151512_6h; DEG_GSE168797_SARS_CBD; DEG_GSE168797_SARS_CBDV; DEG_GSE179661_HepG2; DEG_GSE179661_MHCC97H; DEG_GSE235310_LPS; DEG_GSE235310_Veh; DEG_GSE272113_CBD; DEG_GSE272113_sCBD; DEG_GSE274435_DMSO_24h
GEM	13	5	DEG_GSE151512_12h; DEG_GSE151512_24h; DEG_GSE151512_3h; DEG_GSE151512_6h; DEG_GSE168797_SARS_CBDV	8	DEG_GSE131565; DEG_GSE168797_Mock_CBD; DEG_GSE179661_HepG2; DEG_GSE179661_MHCC97H; DEG_GSE201508_cGAMP; DEG_GSE235310_LPS; DEG_GSE235310_Veh; DEG_GSE261716_CBD20_28d
GPI	13	11	DEG_GSE131565; DEG_GSE151512_12h; DEG_GSE151512_24h; DEG_GSE151512_6h; DEG_GSE168797_Mock_CBD; DEG_GSE168797_SARS_CBD; DEG_GSE179661_MHCC97H; DEG_GSE201508_cGAMP; DEG_GSE261716_CBD20_28d; DEG_GSE274435_DMSO_24h; DEG_GSE274859_LPS_24h	2	DEG_GSE235310_LPS; DEG_GSE272113_sCBD
GRN	13	4	DEG_GSE131565; DEG_GSE151512_24h; DEG_GSE151512_6h; DEG_GSE168797_Mock_CBDV	9	DEG_GSE152088; DEG_GSE168797_Mock_CBD; DEG_GSE168797_SARS_CBD; DEG_GSE168797_SARS_CBDV; DEG_GSE235310_LPS; DEG_GSE235310_Veh; DEG_GSE272113_CBD; DEG_GSE272113_sCBD; DEG_GSE274859_LPS_24h
GSR	13	3	DEG_GSE179661_MHCC97H; DEG_GSE232624_EtOH0.25_CBD0.75_6h; DEG_GSE270378_CBD1.5_24h	10	DEG_GSE168797_SARS_CBDV; DEG_GSE179661_HepG2; DEG_GSE201508_cGAMP; DEG_GSE201508_enthanol; DEG_GSE232624_EtOH0.25_CBD0.75_12h; DEG_GSE232624_EtOH0.75_CBD0.75_12h; DEG_GSE235310_LPS; DEG_GSE235310_Veh; DEG_GSE272113_CBD; DEG_GSE272113_sCBD
HADHB	13	6	DEG_GSE151512_12h; DEG_GSE151512_24h; DEG_GSE179661_HepG2; DEG_GSE179661_MHCC97H; DEG_GSE272113_CBD; DEG_GSE272113_sCBD	7	DEG_GSE168797_SARS_CBD; DEG_GSE168797_SARS_CBDV; DEG_GSE235310_LPS; DEG_GSE235310_Veh; DEG_GSE261716_CBD0.2_28d; DEG_GSE261716_CBD20_28d; DEG_GSE274435_DMSO_24h
HMGB3	13	12	DEG_GSE131565; DEG_GSE151512_12h; DEG_GSE151512_24h; DEG_GSE151512_6h; DEG_GSE168797_Mock_CBD; DEG_GSE168797_SARS_CBD; DEG_GSE179661_HepG2; DEG_GSE179661_MHCC97H; DEG_GSE235310_Veh; DEG_GSE272113_CBD; DEG_GSE272113_sCBD; DEG_GSE274859_LPS_24h	1	DEG_GSE168797_SARS_CBDV
HMGN2	13	7	DEG_GSE131565; DEG_GSE151512_12h; DEG_GSE151512_24h; DEG_GSE168797_Mock_CBD; DEG_GSE179661_HepG2; DEG_GSE201508_cGAMP; DEG_GSE274859_LPS_24h	6	DEG_GSE232624_EtOH0.25_CBD0.75_12h; DEG_GSE235310_Veh; DEG_GSE261716_CBD0.2_28d; DEG_GSE261716_CBD10_28d; DEG_GSE261716_CBD20_28d; DEG_GSE261716_CBD20_2d
HSPA9	13	1	DEG_GSE232624_EtOH0.75_CBD0.75_12h	12	DEG_GSE131565; DEG_GSE151512_12h; DEG_GSE151512_24h; DEG_GSE168797_Mock_CBD; DEG_GSE168797_SARS_CBD; DEG_GSE179661_MHCC97H; DEG_GSE235310_LPS; DEG_GSE235310_Veh; DEG_GSE266113_WT; DEG_GSE272113_CBD; DEG_GSE272113_sCBD; DEG_GSE274859_LPS_24h
IRF2BP2	13	4	DEG_GSE151512_6h; DEG_GSE261716_CBD10_28d; DEG_GSE261716_CBD20_28d; DEG_GSE261716_CBD20_2d	9	DEG_GSE131565; DEG_GSE151512_24h; DEG_GSE168797_Mock_CBD; DEG_GSE168797_SARS_CBD; DEG_GSE179661_HepG2; DEG_GSE179661_MHCC97H; DEG_GSE235310_LPS; DEG_GSE272113_sCBD; DEG_GSE274859_LPS_24h
IRF2BPL	13	3	DEG_GSE168797_Mock_CBDV; DEG_GSE168797_SARS_CBD; DEG_GSE179661_MHCC97H	10	DEG_GSE131565; DEG_GSE151512_12h; DEG_GSE151512_24h; DEG_GSE152088; DEG_GSE179661_HepG2; DEG_GSE235310_LPS; DEG_GSE235310_Veh; DEG_GSE272113_CBD; DEG_GSE272113_sCBD; DEG_GSE274859_LPS_24h
JUN	13	5	DEG_GSE151512_12h; DEG_GSE151512_3h; DEG_GSE151512_6h; DEG_GSE168797_Mock_CBDV; DEG_GSE168797_SARS_CBDV	8	DEG_GSE131565; DEG_GSE152088; DEG_GSE168797_Mock_CBD; DEG_GSE179661_HepG2; DEG_GSE179661_MHCC97H; DEG_GSE201508_cGAMP; DEG_GSE266113_WT; DEG_GSE274859_LPS_24h
LARP1	13	10	DEG_GSE131565; DEG_GSE151512_6h; DEG_GSE168797_Mock_CBDV; DEG_GSE179661_HepG2; DEG_GSE179661_MHCC97H; DEG_GSE261716_CBD0.2_28d; DEG_GSE261716_CBD10_28d; DEG_GSE261716_CBD20_28d; DEG_GSE261716_CBD20_2d; DEG_GSE274859_LPS_24h	3	DEG_GSE168797_Mock_CBD; DEG_GSE272113_CBD; DEG_GSE272113_sCBD
LBR	13	6	DEG_GSE131565; DEG_GSE168797_Mock_CBD; DEG_GSE168797_SARS_CBD; DEG_GSE179661_HepG2; DEG_GSE179661_MHCC97H; DEG_GSE274859_LPS_24h	7	DEG_GSE151512_12h; DEG_GSE201508_cGAMP; DEG_GSE235310_LPS; DEG_GSE235310_Veh; DEG_GSE266113_WT; DEG_GSE272113_CBD; DEG_GSE272113_sCBD
LONRF3	13	2	DEG_GSE261716_CBD10_28d; DEG_GSE261716_CBD20_28d	11	DEG_GSE131565; DEG_GSE151512_24h; DEG_GSE168797_Mock_CBD; DEG_GSE179661_HepG2; DEG_GSE179661_MHCC97H; DEG_GSE201508_cGAMP; DEG_GSE201508_enthanol; DEG_GSE235310_LPS; DEG_GSE235310_Veh; DEG_GSE272113_CBD; DEG_GSE274435_EtOH_24h
MAFF	13	0	NA	13	DEG_GSE131565; DEG_GSE151512_12h; DEG_GSE151512_24h; DEG_GSE151512_3h; DEG_GSE151512_6h; DEG_GSE168797_Mock_CBD; DEG_GSE179661_HepG2; DEG_GSE179661_MHCC97H; DEG_GSE235310_Veh; DEG_GSE261716_CBD20_2d; DEG_GSE272113_CBD; DEG_GSE272113_sCBD; DEG_GSE274859_LPS_24h
MANF	13	2	DEG_GSE151512_24h; DEG_GSE235310_Veh	11	DEG_GSE131565; DEG_GSE168797_Mock_CBD; DEG_GSE168797_SARS_CBD; DEG_GSE168797_SARS_CBDV; DEG_GSE179661_HepG2; DEG_GSE179661_MHCC97H; DEG_GSE201508_cGAMP; DEG_GSE201508_enthanol; DEG_GSE272113_CBD; DEG_GSE272113_sCBD; DEG_GSE274859_LPS_24h
MCM2	13	10	DEG_GSE131565; DEG_GSE151512_12h; DEG_GSE151512_24h; DEG_GSE168797_Mock_CBD; DEG_GSE168797_SARS_CBD; DEG_GSE179661_HepG2; DEG_GSE179661_MHCC97H; DEG_GSE201508_cGAMP; DEG_GSE235310_LPS; DEG_GSE274859_LPS_24h	3	DEG_GSE232624_Veh_CBD3_12h; DEG_GSE266113_WT; DEG_GSE272113_CBD
MTHFD1L	13	5	DEG_GSE131565; DEG_GSE152088; DEG_GSE168797_Mock_CBD; DEG_GSE168797_SARS_CBDV; DEG_GSE274859_LPS_24h	8	DEG_GSE151512_12h; DEG_GSE151512_24h; DEG_GSE151512_6h; DEG_GSE179661_HepG2; DEG_GSE179661_MHCC97H; DEG_GSE235310_LPS; DEG_GSE272113_CBD; DEG_GSE272113_sCBD
MTUS1	13	9	DEG_GSE151512_12h; DEG_GSE151512_24h; DEG_GSE151512_6h; DEG_GSE168797_Mock_CBD; DEG_GSE168797_SARS_CBD; DEG_GSE168797_SARS_CBDV; DEG_GSE179661_HepG2; DEG_GSE272113_CBD; DEG_GSE272113_sCBD	4	DEG_GSE168797_Mock_CBDV; DEG_GSE179661_MHCC97H; DEG_GSE201508_cGAMP; DEG_GSE201508_enthanol
MYCBP	13	11	DEG_GSE131565; DEG_GSE151512_24h; DEG_GSE168797_Mock_CBD; DEG_GSE168797_SARS_CBD; DEG_GSE179661_HepG2; DEG_GSE201508_cGAMP; DEG_GSE201508_enthanol; DEG_GSE235310_Veh; DEG_GSE272113_CBD; DEG_GSE272113_sCBD; DEG_GSE274859_LPS_24h	2	DEG_GSE232624_EtOH0.75_CBD0.75_12h; DEG_GSE261716_CBD20_2d
MYL6	13	11	DEG_GSE131565; DEG_GSE151512_12h; DEG_GSE151512_24h; DEG_GSE168797_Mock_CBD; DEG_GSE168797_SARS_CBD; DEG_GSE179661_MHCC97H; DEG_GSE235310_LPS; DEG_GSE235310_Veh; DEG_GSE266113_WT; DEG_GSE272113_CBD; DEG_GSE272113_sCBD	2	DEG_GSE179661_HepG2; DEG_GSE261716_CBD0.2_2d
NDST1	13	8	DEG_GSE131565; DEG_GSE151512_24h; DEG_GSE151512_6h; DEG_GSE168797_Mock_CBD; DEG_GSE168797_SARS_CBD; DEG_GSE179661_MHCC97H; DEG_GSE261716_CBD20_28d; DEG_GSE261716_CBD20_2d	5	DEG_GSE179661_HepG2; DEG_GSE235310_LPS; DEG_GSE272113_CBD; DEG_GSE272113_sCBD; DEG_GSE274859_LPS_24h
NFIL3	13	4	DEG_GSE261716_CBD10_28d; DEG_GSE261716_CBD20_28d; DEG_GSE275998_CDB10; DEG_GSE275998_CDB20	9	DEG_GSE131565; DEG_GSE168797_Mock_CBD; DEG_GSE179661_HepG2; DEG_GSE179661_MHCC97H; DEG_GSE201508_cGAMP; DEG_GSE235310_Veh; DEG_GSE272113_CBD; DEG_GSE272113_sCBD; GSE70689_CBD_NoLPS
NID1	13	7	DEG_GSE131565; DEG_GSE168797_SARS_CBD; DEG_GSE168797_SARS_CBDV; DEG_GSE179661_HepG2; DEG_GSE179661_MHCC97H; DEG_GSE235310_LPS; DEG_GSE261716_CBD0.2_2d	6	DEG_GSE151512_12h; DEG_GSE151512_24h; DEG_GSE168797_Mock_CBD; DEG_GSE201508_cGAMP; DEG_GSE272113_CBD; DEG_GSE272113_sCBD
NPAS2	13	8	DEG_GSE168797_Mock_CBDV; DEG_GSE201508_cGAMP; DEG_GSE261716_CBD0.2_28d; DEG_GSE261716_CBD10_28d; DEG_GSE261716_CBD20_28d; DEG_GSE274435_EtOH_24h; DEG_GSE275998_CDB10; DEG_GSE275998_CDB20	5	DEG_GSE131565; DEG_GSE151512_24h; DEG_GSE168797_Mock_CBD; DEG_GSE179661_MHCC97H; DEG_GSE235310_Veh
NQO1	13	2	DEG_GSE168797_Mock_CBD; DEG_GSE179661_MHCC97H	11	DEG_GSE151512_12h; DEG_GSE151512_24h; DEG_GSE151512_6h; DEG_GSE168797_SARS_CBDV; DEG_GSE201508_cGAMP; DEG_GSE201508_enthanol; DEG_GSE235310_Veh; DEG_GSE261716_CBD20_28d; DEG_GSE272113_CBD; DEG_GSE272113_sCBD; GSE70689_CBD_NoLPS
NR4A1	13	8	DEG_GSE168797_SARS_CBD; DEG_GSE168797_SARS_CBDV; DEG_GSE235310_LPS; DEG_GSE235310_Veh; DEG_GSE261716_CBD20_28d; DEG_GSE272113_CBD; DEG_GSE272113_sCBD; DEG_GSE274859_LPS_24h	5	DEG_GSE131565; DEG_GSE151512_12h; DEG_GSE168797_Mock_CBDV; DEG_GSE179661_HepG2; DEG_GSE179661_MHCC97H
PDIA3	13	3	DEG_GSE151512_12h; DEG_GSE151512_24h; DEG_GSE235310_Veh	10	DEG_GSE131565; DEG_GSE168797_Mock_CBD; DEG_GSE168797_SARS_CBD; DEG_GSE179661_MHCC97H; DEG_GSE201508_cGAMP; DEG_GSE201508_enthanol; DEG_GSE272113_CBD; DEG_GSE272113_sCBD; DEG_GSE274435_DMSO_24h; DEG_GSE274859_LPS_24h
PER1	13	4	DEG_GSE168797_Mock_CBD; DEG_GSE168797_SARS_CBD; DEG_GSE168797_SARS_CBDV; DEG_GSE261716_CBD20_2d	9	DEG_GSE131565; DEG_GSE151512_12h; DEG_GSE151512_24h; DEG_GSE152088; DEG_GSE179661_HepG2; DEG_GSE179661_MHCC97H; DEG_GSE201508_cGAMP; DEG_GSE235310_LPS; DEG_GSE272113_CBD
PER3	13	3	DEG_GSE131565; DEG_GSE168797_Mock_CBD; DEG_GSE168797_SARS_CBD	10	DEG_GSE151512_12h; DEG_GSE151512_24h; DEG_GSE151512_6h; DEG_GSE201508_cGAMP; DEG_GSE235310_Veh; DEG_GSE261716_CBD10_28d; DEG_GSE261716_CBD20_28d; DEG_GSE274435_DMSO_24h; DEG_GSE275998_CDB10; DEG_GSE275998_CDB20
PFKFB3	13	7	DEG_GSE151512_12h; DEG_GSE151512_24h; DEG_GSE151512_6h; DEG_GSE168797_Mock_CBDV; DEG_GSE168797_SARS_CBD; DEG_GSE179661_MHCC97H; GSE70689_CBD_NoLPS	6	DEG_GSE179661_HepG2; DEG_GSE261716_CBD20_28d; DEG_GSE272113_CBD; DEG_GSE272113_sCBD; DEG_GSE274435_EtOH_24h; DEG_GSE274859_LPS_24h
PFN1	13	10	DEG_GSE131565; DEG_GSE151512_24h; DEG_GSE168797_Mock_CBD; DEG_GSE179661_MHCC97H; DEG_GSE201508_cGAMP; DEG_GSE232624_EtOH0.25_CBD0.75_6h; DEG_GSE232624_EtOH0.75_CBD0.75_6h; DEG_GSE235310_LPS; DEG_GSE235310_Veh; DEG_GSE274859_LPS_24h	3	DEG_GSE232624_EtOH0.75_CBD0.75_12h; DEG_GSE232624_Veh_CBD0.75_6h; DEG_GSE232624_Veh_CBD3_6h
PLEKHM2	13	3	DEG_GSE168797_Mock_CBDV; DEG_GSE261716_CBD0.2_2d; DEG_GSE261716_CBD20_2d	10	DEG_GSE131565; DEG_GSE151512_24h; DEG_GSE168797_Mock_CBD; DEG_GSE179661_HepG2; DEG_GSE179661_MHCC97H; DEG_GSE201508_cGAMP; DEG_GSE235310_Veh; DEG_GSE272113_CBD; DEG_GSE272113_sCBD; DEG_GSE274859_LPS_24h
PMAIP1	13	4	DEG_GSE232624_EtOH0.25_CBD0.75_12h; DEG_GSE235310_LPS; DEG_GSE272113_CBD; DEG_GSE272113_sCBD	9	DEG_GSE131565; DEG_GSE151512_3h; DEG_GSE151512_6h; DEG_GSE168797_Mock_CBD; DEG_GSE168797_SARS_CBD; DEG_GSE179661_HepG2; DEG_GSE179661_MHCC97H; DEG_GSE235310_Veh; DEG_GSE266113_WT
PPIA	13	9	DEG_GSE131565; DEG_GSE151512_12h; DEG_GSE151512_24h; DEG_GSE168797_Mock_CBD; DEG_GSE179661_HepG2; DEG_GSE232624_Veh_CBD0.75_12h; DEG_GSE232624_Veh_CBD3_12h; DEG_GSE235310_LPS; DEG_GSE274859_LPS_24h	4	DEG_GSE232624_EtOH0.25_CBD0.75_12h; DEG_GSE232624_EtOH0.75_CBD0.75_12h; DEG_GSE261716_CBD20_28d; DEG_GSE261716_CBD20_2d
PPIF	13	4	DEG_GSE151512_24h; DEG_GSE151512_6h; DEG_GSE201508_cGAMP; DEG_GSE274859_LPS_24h	9	DEG_GSE131565; DEG_GSE168797_Mock_CBD; DEG_GSE168797_SARS_CBD; DEG_GSE179661_HepG2; DEG_GSE179661_MHCC97H; DEG_GSE232624_Veh_CBD3_6h; DEG_GSE235310_LPS; DEG_GSE272113_CBD; DEG_GSE272113_sCBD
PRNP	13	3	DEG_GSE151512_24h; DEG_GSE261716_CBD0.2_2d; DEG_GSE272113_CBD	10	DEG_GSE131565; DEG_GSE168797_Mock_CBD; DEG_GSE179661_HepG2; DEG_GSE179661_MHCC97H; DEG_GSE232624_Veh_CBD3_12h; DEG_GSE235310_LPS; DEG_GSE235310_Veh; DEG_GSE274435_DMSO_24h; DEG_GSE274435_EtOH_24h; DEG_GSE274859_LPS_24h
PTP4A1	13	3	DEG_GSE151512_24h; DEG_GSE152088; DEG_GSE168797_SARS_CBDV	10	DEG_GSE131565; DEG_GSE168797_Mock_CBD; DEG_GSE168797_Mock_CBDV; DEG_GSE179661_MHCC97H; DEG_GSE235310_LPS; DEG_GSE235310_Veh; DEG_GSE261716_CBD20_28d; DEG_GSE261716_CBD20_2d; DEG_GSE266113_WT; DEG_GSE274859_LPS_24h
RAB30	13	9	DEG_GSE131565; DEG_GSE151512_12h; DEG_GSE151512_24h; DEG_GSE151512_6h; DEG_GSE168797_SARS_CBDV; DEG_GSE235310_LPS; DEG_GSE235310_Veh; DEG_GSE266113_WT; DEG_GSE272113_sCBD	4	DEG_GSE152088; DEG_GSE168797_Mock_CBD; DEG_GSE179661_HepG2; DEG_GSE261716_CBD0.2_28d
RAB5B	13	7	DEG_GSE151512_6h; DEG_GSE232624_Veh_CBD3_12h; DEG_GSE235310_LPS; DEG_GSE235310_Veh; DEG_GSE266113_WT; DEG_GSE272113_CBD; DEG_GSE272113_sCBD	6	DEG_GSE131565; DEG_GSE168797_Mock_CBD; DEG_GSE168797_SARS_CBD; DEG_GSE168797_SARS_CBDV; DEG_GSE201508_cGAMP; DEG_GSE201508_enthanol
RENBP	13	0	NA	13	DEG_GSE131565; DEG_GSE151512_24h; DEG_GSE168797_Mock_CBD; DEG_GSE179661_HepG2; DEG_GSE179661_MHCC97H; DEG_GSE201508_cGAMP; DEG_GSE201508_enthanol; DEG_GSE235310_LPS; DEG_GSE235310_Veh; DEG_GSE266113_mutNdufs4; DEG_GSE272113_CBD; DEG_GSE272113_sCBD; DEG_GSE274859_LPS_24h
RHOB	13	8	DEG_GSE151512_12h; DEG_GSE151512_24h; DEG_GSE151512_6h; DEG_GSE168797_SARS_CBD; DEG_GSE168797_SARS_CBDV; DEG_GSE235310_Veh; DEG_GSE272113_CBD; DEG_GSE272113_sCBD	5	DEG_GSE168797_Mock_CBDV; DEG_GSE179661_HepG2; DEG_GSE179661_MHCC97H; DEG_GSE274859_LPS_24h; DEG_GSE275998_CDB20
RRBP1	13	2	DEG_GSE151512_6h; DEG_GSE261716_CBD10_28d	11	DEG_GSE131565; DEG_GSE151512_24h; DEG_GSE168797_Mock_CBD; DEG_GSE168797_SARS_CBD; DEG_GSE168797_SARS_CBDV; DEG_GSE179661_MHCC97H; DEG_GSE235310_LPS; DEG_GSE235310_Veh; DEG_GSE272113_CBD; DEG_GSE272113_sCBD; DEG_GSE274859_LPS_24h
SDCBP	13	0	NA	13	DEG_GSE131565; DEG_GSE151512_24h; DEG_GSE168797_Mock_CBD; DEG_GSE168797_SARS_CBD; DEG_GSE168797_SARS_CBDV; DEG_GSE179661_HepG2; DEG_GSE179661_MHCC97H; DEG_GSE201508_cGAMP; DEG_GSE201508_enthanol; DEG_GSE235310_LPS; DEG_GSE235310_Veh; DEG_GSE261716_CBD20_28d; DEG_GSE274859_LPS_24h
SIPA1L2	13	2	DEG_GSE168797_Mock_CBDV; DEG_GSE274859_LPS_24h	11	DEG_GSE131565; DEG_GSE151512_24h; DEG_GSE168797_Mock_CBD; DEG_GSE168797_SARS_CBD; DEG_GSE179661_HepG2; DEG_GSE179661_MHCC97H; DEG_GSE201508_cGAMP; DEG_GSE235310_LPS; DEG_GSE235310_Veh; DEG_GSE272113_CBD; DEG_GSE272113_sCBD
SLC16A3	13	8	DEG_GSE151512_12h; DEG_GSE151512_24h; DEG_GSE151512_6h; DEG_GSE168797_Mock_CBD; DEG_GSE179661_MHCC97H; DEG_GSE201508_cGAMP; DEG_GSE274435_DMSO_24h; DEG_GSE274859_LPS_24h	5	DEG_GSE152088; DEG_GSE179661_HepG2; DEG_GSE235310_LPS; DEG_GSE272113_CBD; DEG_GSE272113_sCBD
SLC20A1	13	0	NA	13	DEG_GSE131565; DEG_GSE151512_12h; DEG_GSE151512_24h; DEG_GSE151512_6h; DEG_GSE168797_Mock_CBD; DEG_GSE168797_SARS_CBD; DEG_GSE168797_SARS_CBDV; DEG_GSE179661_HepG2; DEG_GSE201508_cGAMP; DEG_GSE201508_enthanol; DEG_GSE272113_CBD; DEG_GSE272113_sCBD; DEG_GSE274859_LPS_24h
SLC7A1	13	1	DEG_GSE131565	12	DEG_GSE151512_12h; DEG_GSE151512_24h; DEG_GSE151512_3h; DEG_GSE151512_6h; DEG_GSE168797_Mock_CBD; DEG_GSE168797_SARS_CBD; DEG_GSE179661_HepG2; DEG_GSE179661_MHCC97H; DEG_GSE201508_cGAMP; DEG_GSE235310_Veh; DEG_GSE272113_CBD; DEG_GSE272113_sCBD
SPHK1	13	2	DEG_GSE131565; DEG_GSE168797_Mock_CBDV	11	DEG_GSE151512_24h; DEG_GSE168797_Mock_CBD; DEG_GSE168797_SARS_CBD; DEG_GSE179661_HepG2; DEG_GSE201508_cGAMP; DEG_GSE201508_enthanol; DEG_GSE235310_LPS; DEG_GSE235310_Veh; DEG_GSE272113_CBD; DEG_GSE272113_sCBD; DEG_GSE275998_CDB20
TK1	13	11	DEG_GSE131565; DEG_GSE151512_12h; DEG_GSE151512_24h; DEG_GSE168797_Mock_CBD; DEG_GSE168797_SARS_CBD; DEG_GSE179661_MHCC97H; DEG_GSE201508_cGAMP; DEG_GSE235310_LPS; DEG_GSE235310_Veh; DEG_GSE261716_CBD0.2_28d; DEG_GSE274859_LPS_24h	2	DEG_GSE152088; DEG_GSE272113_sCBD
TMEM33	13	1	DEG_GSE152088	12	DEG_GSE151512_12h; DEG_GSE151512_6h; DEG_GSE168797_Mock_CBD; DEG_GSE168797_SARS_CBD; DEG_GSE179661_HepG2; DEG_GSE201508_cGAMP; DEG_GSE201508_enthanol; DEG_GSE235310_LPS; DEG_GSE235310_Veh; DEG_GSE272113_sCBD; DEG_GSE274435_DMSO_24h; DEG_GSE274859_LPS_24h
TMEM39A	13	1	DEG_GSE235310_LPS	12	DEG_GSE131565; DEG_GSE151512_12h; DEG_GSE151512_24h; DEG_GSE168797_Mock_CBD; DEG_GSE168797_SARS_CBD; DEG_GSE179661_HepG2; DEG_GSE179661_MHCC97H; DEG_GSE201508_cGAMP; DEG_GSE201508_enthanol; DEG_GSE272113_CBD; DEG_GSE272113_sCBD; DEG_GSE274859_LPS_24h
TMEM97	13	6	DEG_GSE131565; DEG_GSE168797_Mock_CBD; DEG_GSE179661_HepG2; DEG_GSE179661_MHCC97H; DEG_GSE235310_LPS; DEG_GSE235310_Veh	7	DEG_GSE151512_12h; DEG_GSE151512_24h; DEG_GSE151512_6h; DEG_GSE168797_Mock_CBDV; DEG_GSE201508_cGAMP; DEG_GSE272113_CBD; DEG_GSE272113_sCBD
TMOD1	13	5	DEG_GSE151512_12h; DEG_GSE151512_24h; DEG_GSE235310_LPS; DEG_GSE272113_CBD; DEG_GSE272113_sCBD	8	DEG_GSE131565; DEG_GSE151512_3h; DEG_GSE168797_Mock_CBD; DEG_GSE168797_SARS_CBD; DEG_GSE179661_HepG2; DEG_GSE179661_MHCC97H; DEG_GSE261716_CBD0.2_2d; DEG_GSE274859_LPS_24h
TMPO	13	13	DEG_GSE131565; DEG_GSE151512_12h; DEG_GSE151512_24h; DEG_GSE152088; DEG_GSE168797_Mock_CBD; DEG_GSE168797_SARS_CBD; DEG_GSE179661_HepG2; DEG_GSE179661_MHCC97H; DEG_GSE201508_cGAMP; DEG_GSE232624_EtOH0.75_CBD0.75_6h; DEG_GSE235310_LPS; DEG_GSE235310_Veh; DEG_GSE274859_LPS_24h	0	NA
TP53INP1	13	6	DEG_GSE151512_12h; DEG_GSE151512_24h; DEG_GSE151512_6h; DEG_GSE179661_HepG2; DEG_GSE272113_CBD; DEG_GSE272113_sCBD	7	DEG_GSE168797_Mock_CBD; DEG_GSE168797_SARS_CBD; DEG_GSE179661_MHCC97H; DEG_GSE201508_cGAMP; DEG_GSE235310_LPS; DEG_GSE235310_Veh; DEG_GSE274859_LPS_24h
UNC5B	13	2	DEG_GSE235310_LPS; DEG_GSE235310_Veh	11	DEG_GSE131565; DEG_GSE151512_12h; DEG_GSE151512_24h; DEG_GSE151512_3h; DEG_GSE151512_6h; DEG_GSE152088; DEG_GSE168797_Mock_CBD; DEG_GSE168797_SARS_CBD; DEG_GSE179661_HepG2; DEG_GSE179661_MHCC97H; DEG_GSE232624_EtOH0.25_CBD0.75_12h
ZBTB21	13	5	DEG_GSE168797_SARS_CBD; DEG_GSE168797_SARS_CBDV; DEG_GSE261716_CBD0.2_28d; DEG_GSE261716_CBD10_28d; DEG_GSE261716_CBD20_28d	8	DEG_GSE131565; DEG_GSE168797_Mock_CBD; DEG_GSE179661_HepG2; DEG_GSE179661_MHCC97H; DEG_GSE201508_cGAMP; DEG_GSE235310_LPS; DEG_GSE235310_Veh; DEG_GSE274859_LPS_24h
ZNF300	13	3	DEG_GSE131565; DEG_GSE151512_24h; DEG_GSE261716_CBD0.2_2d	10	DEG_GSE151512_6h; DEG_GSE168797_Mock_CBD; DEG_GSE168797_SARS_CBD; DEG_GSE261716_CBD20_28d; DEG_GSE274859_LPS_24h
ABCA1	12	4	DEG_GSE168797_Mock_CBDV; DEG_GSE179661_HepG2; DEG_GSE272113_sCBD; DEG_GSE274859_LPS_24h	8	DEG_GSE151512_24h; DEG_GSE168797_Mock_CBD; DEG_GSE168797_SARS_CBD; DEG_GSE179661_MHCC97H; DEG_GSE201508_cGAMP; DEG_GSE201508_enthanol; DEG_GSE235310_LPS; DEG_GSE235310_Veh
ACTB	12	12	DEG_GSE131565; DEG_GSE151512_12h; DEG_GSE151512_24h; DEG_GSE151512_6h; DEG_GSE168797_Mock_CBD; DEG_GSE179661_HepG2; DEG_GSE179661_MHCC97H; DEG_GSE201508_cGAMP; DEG_GSE235310_LPS; DEG_GSE235310_Veh; DEG_GSE274435_DMSO_24h; DEG_GSE274859_LPS_24h	0	NA
ADGRG1	12	4	DEG_GSE151512_12h; DEG_GSE168797_SARS_CBD; DEG_GSE272113_CBD; DEG_GSE272113_sCBD	8	DEG_GSE131565; DEG_GSE152088; DEG_GSE168797_Mock_CBDV; DEG_GSE179661_HepG2; DEG_GSE179661_MHCC97H; DEG_GSE261716_CBD20_28d; DEG_GSE266113_mutNdufs4; DEG_GSE266113_WT
ADM2	12	0	NA	12	DEG_GSE131565; DEG_GSE151512_12h; DEG_GSE151512_24h; DEG_GSE151512_3h; DEG_GSE151512_6h; DEG_GSE168797_Mock_CBD; DEG_GSE168797_SARS_CBD; DEG_GSE179661_HepG2; DEG_GSE179661_MHCC97H; DEG_GSE201508_cGAMP; DEG_GSE235310_LPS; DEG_GSE235310_Veh
AIFM2	12	0	NA	12	DEG_GSE131565; DEG_GSE151512_12h; DEG_GSE151512_6h; DEG_GSE168797_Mock_CBD; DEG_GSE168797_SARS_CBD; DEG_GSE179661_HepG2; DEG_GSE201508_cGAMP; DEG_GSE235310_LPS; DEG_GSE235310_Veh; DEG_GSE272113_CBD; DEG_GSE272113_sCBD; DEG_GSE274859_LPS_24h
ALDH1L2	12	0	NA	12	DEG_GSE131565; DEG_GSE151512_12h; DEG_GSE151512_24h; DEG_GSE151512_6h; DEG_GSE168797_Mock_CBD; DEG_GSE168797_SARS_CBD; DEG_GSE179661_MHCC97H; DEG_GSE201508_cGAMP; DEG_GSE235310_Veh; DEG_GSE272113_CBD; DEG_GSE272113_sCBD; DEG_GSE274859_LPS_24h
ANKRD33B	12	7	DEG_GSE131565; DEG_GSE168797_SARS_CBD; DEG_GSE168797_SARS_CBDV; DEG_GSE201508_cGAMP; DEG_GSE235310_LPS; DEG_GSE261716_CBD0.2_2d; DEG_GSE266113_WT	5	DEG_GSE151512_24h; DEG_GSE168797_Mock_CBD; DEG_GSE179661_MHCC97H; DEG_GSE272113_sCBD; DEG_GSE274859_LPS_24h
ARID5B	12	4	DEG_GSE168797_SARS_CBDV; DEG_GSE179661_MHCC97H; DEG_GSE235310_Veh; DEG_GSE266113_WT	8	DEG_GSE168797_Mock_CBD; DEG_GSE168797_Mock_CBDV; DEG_GSE179661_HepG2; DEG_GSE201508_cGAMP; DEG_GSE235310_LPS; DEG_GSE272113_CBD; DEG_GSE272113_sCBD; DEG_GSE274859_LPS_24h
ARMCX3	12	3	DEG_GSE151512_12h; DEG_GSE151512_24h; DEG_GSE168797_Mock_CBDV	9	DEG_GSE131565; DEG_GSE168797_Mock_CBD; DEG_GSE168797_SARS_CBD; DEG_GSE179661_HepG2; DEG_GSE179661_MHCC97H; DEG_GSE201508_cGAMP; DEG_GSE201508_enthanol; DEG_GSE235310_LPS; DEG_GSE235310_Veh
ASS1	12	1	DEG_GSE179661_HepG2	11	DEG_GSE131565; DEG_GSE151512_12h; DEG_GSE151512_24h; DEG_GSE151512_6h; DEG_GSE152088; DEG_GSE168797_Mock_CBD; DEG_GSE168797_SARS_CBD; DEG_GSE179661_MHCC97H; DEG_GSE235310_LPS; DEG_GSE235310_Veh; DEG_GSE274859_LPS_24h
ATF3	12	3	DEG_GSE168797_SARS_CBD; DEG_GSE168797_SARS_CBDV; DEG_GSE261716_CBD0.2_28d	9	DEG_GSE131565; DEG_GSE151512_24h; DEG_GSE151512_3h; DEG_GSE168797_Mock_CBD; DEG_GSE179661_HepG2; DEG_GSE179661_MHCC97H; DEG_GSE235310_Veh; DEG_GSE274435_EtOH_4h; DEG_GSE274859_LPS_24h
ATP6V0B	12	0	NA	12	DEG_GSE131565; DEG_GSE168797_Mock_CBD; DEG_GSE168797_SARS_CBD; DEG_GSE168797_SARS_CBDV; DEG_GSE179661_HepG2; DEG_GSE179661_MHCC97H; DEG_GSE232624_EtOH0.75_CBD0.75_6h; DEG_GSE235310_LPS; DEG_GSE235310_Veh; DEG_GSE272113_CBD; DEG_GSE272113_sCBD; DEG_GSE274859_LPS_24h
ATP6V1C1	12	3	DEG_GSE151512_24h; DEG_GSE152088; DEG_GSE179661_HepG2	9	DEG_GSE168797_Mock_CBD; DEG_GSE168797_SARS_CBD; DEG_GSE179661_MHCC97H; DEG_GSE201508_cGAMP; DEG_GSE235310_LPS; DEG_GSE235310_Veh; DEG_GSE272113_CBD; DEG_GSE272113_sCBD; DEG_GSE274859_LPS_24h
ATP6V1F	12	0	NA	12	DEG_GSE152088; DEG_GSE168797_Mock_CBD; DEG_GSE168797_SARS_CBD; DEG_GSE168797_SARS_CBDV; DEG_GSE179661_HepG2; DEG_GSE201508_cGAMP; DEG_GSE201508_enthanol; DEG_GSE235310_LPS; DEG_GSE235310_Veh; DEG_GSE261716_CBD0.2_2d; DEG_GSE261716_CBD20_2d; DEG_GSE274859_LPS_24h
AXIN2	12	9	DEG_GSE131565; DEG_GSE168797_Mock_CBD; DEG_GSE168797_SARS_CBDV; DEG_GSE179661_MHCC97H; DEG_GSE235310_LPS; DEG_GSE235310_Veh; DEG_GSE261716_CBD20_28d; DEG_GSE272113_CBD; DEG_GSE272113_sCBD	3	DEG_GSE151512_12h; DEG_GSE168797_Mock_CBDV; DEG_GSE179661_HepG2
C11orf24	12	7	DEG_GSE151512_12h; DEG_GSE151512_24h; DEG_GSE168797_SARS_CBD; DEG_GSE168797_SARS_CBDV; DEG_GSE179661_MHCC97H; DEG_GSE274859_LPS_24h; GSE70689_CBD_NoLPS	5	DEG_GSE235310_LPS; DEG_GSE261716_CBD0.2_28d; DEG_GSE261716_CBD20_28d; DEG_GSE261716_CBD20_2d; DEG_GSE272113_sCBD
CAD	12	7	DEG_GSE131565; DEG_GSE152088; DEG_GSE168797_Mock_CBD; DEG_GSE168797_SARS_CBD; DEG_GSE179661_HepG2; DEG_GSE179661_MHCC97H; DEG_GSE274859_LPS_24h	5	DEG_GSE151512_12h; DEG_GSE151512_24h; DEG_GSE232624_EtOH0.25_CBD0.75_12h; DEG_GSE272113_CBD; DEG_GSE272113_sCBD
CARS1	12	0	NA	12	DEG_GSE131565; DEG_GSE151512_12h; DEG_GSE151512_24h; DEG_GSE151512_3h; DEG_GSE151512_6h; DEG_GSE168797_Mock_CBD; DEG_GSE168797_SARS_CBD; DEG_GSE179661_HepG2; DEG_GSE179661_MHCC97H; DEG_GSE232624_EtOH0.25_CBD0.75_6h; DEG_GSE235310_LPS; DEG_GSE235310_Veh
CBX4	12	1	DEG_GSE235310_LPS	11	DEG_GSE131565; DEG_GSE151512_24h; DEG_GSE152088; DEG_GSE168797_Mock_CBD; DEG_GSE168797_SARS_CBD; DEG_GSE179661_HepG2; DEG_GSE179661_MHCC97H; DEG_GSE235310_Veh; DEG_GSE272113_CBD; DEG_GSE272113_sCBD; DEG_GSE274859_LPS_24h
CCND3	12	9	DEG_GSE131565; DEG_GSE168797_Mock_CBD; DEG_GSE168797_SARS_CBD; DEG_GSE168797_SARS_CBDV; DEG_GSE179661_MHCC97H; DEG_GSE201508_cGAMP; DEG_GSE235310_Veh; DEG_GSE272113_CBD; DEG_GSE274859_LPS_24h	3	DEG_GSE168797_Mock_CBDV; DEG_GSE179661_HepG2; DEG_GSE235310_LPS
CCNF	12	11	DEG_GSE131565; DEG_GSE151512_12h; DEG_GSE151512_24h; DEG_GSE151512_6h; DEG_GSE168797_Mock_CBD; DEG_GSE168797_SARS_CBD; DEG_GSE179661_HepG2; DEG_GSE179661_MHCC97H; DEG_GSE201508_cGAMP; DEG_GSE235310_Veh; DEG_GSE274859_LPS_24h	1	DEG_GSE261716_CBD0.2_28d
CD55	12	1	DEG_GSE272113_CBD	11	DEG_GSE131565; DEG_GSE151512_12h; DEG_GSE151512_24h; DEG_GSE168797_Mock_CBD; DEG_GSE168797_SARS_CBD; DEG_GSE179661_HepG2; DEG_GSE179661_MHCC97H; DEG_GSE201508_cGAMP; DEG_GSE235310_Veh; DEG_GSE261716_CBD0.2_28d; DEG_GSE261716_CBD20_28d
CDK6	12	9	DEG_GSE131565; DEG_GSE152088; DEG_GSE168797_Mock_CBD; DEG_GSE168797_SARS_CBD; DEG_GSE179661_HepG2; DEG_GSE179661_MHCC97H; DEG_GSE235310_LPS; DEG_GSE235310_Veh; DEG_GSE274859_LPS_24h	3	DEG_GSE151512_24h; DEG_GSE201508_cGAMP; DEG_GSE272113_sCBD
CEBPD	12	2	DEG_GSE168797_Mock_CBD; DEG_GSE266113_WT	10	DEG_GSE131565; DEG_GSE152088; DEG_GSE168797_SARS_CBD; DEG_GSE179661_HepG2; DEG_GSE179661_MHCC97H; DEG_GSE235310_LPS; DEG_GSE261716_CBD0.2_28d; DEG_GSE261716_CBD20_2d; DEG_GSE272113_CBD; DEG_GSE272113_sCBD
CHPF2	12	4	DEG_GSE151512_24h; DEG_GSE168797_Mock_CBDV; DEG_GSE179661_MHCC97H; DEG_GSE235310_Veh	8	DEG_GSE131565; DEG_GSE168797_Mock_CBD; DEG_GSE168797_SARS_CBD; DEG_GSE179661_HepG2; DEG_GSE235310_LPS; DEG_GSE272113_CBD; DEG_GSE272113_sCBD; DEG_GSE274859_LPS_24h
CHST3	12	9	DEG_GSE131565; DEG_GSE168797_Mock_CBD; DEG_GSE168797_SARS_CBD; DEG_GSE179661_HepG2; DEG_GSE179661_MHCC97H; DEG_GSE201508_cGAMP; DEG_GSE201508_enthanol; DEG_GSE235310_LPS; DEG_GSE274859_LPS_24h	3	DEG_GSE151512_24h; DEG_GSE235310_Veh; DEG_GSE274435_DMSO_24h
CLIP4	12	0	NA	12	DEG_GSE131565; DEG_GSE151512_12h; DEG_GSE151512_24h; DEG_GSE151512_6h; DEG_GSE168797_Mock_CBD; DEG_GSE168797_SARS_CBD; DEG_GSE168797_SARS_CBDV; DEG_GSE179661_HepG2; DEG_GSE179661_MHCC97H; DEG_GSE201508_cGAMP; DEG_GSE235310_LPS; DEG_GSE235310_Veh
CNIH1	12	0	NA	12	DEG_GSE131565; DEG_GSE151512_12h; DEG_GSE151512_24h; DEG_GSE151512_6h; DEG_GSE168797_Mock_CBD; DEG_GSE179661_HepG2; DEG_GSE201508_cGAMP; DEG_GSE201508_enthanol; DEG_GSE235310_LPS; DEG_GSE235310_Veh; DEG_GSE261716_CBD10_28d; DEG_GSE261716_CBD20_28d
CRELD2	12	2	DEG_GSE151512_24h; DEG_GSE235310_Veh	10	DEG_GSE131565; DEG_GSE168797_Mock_CBD; DEG_GSE168797_SARS_CBD; DEG_GSE179661_MHCC97H; DEG_GSE201508_cGAMP; DEG_GSE201508_enthanol; DEG_GSE272113_CBD; DEG_GSE272113_sCBD; DEG_GSE274435_DMSO_4h; DEG_GSE274435_EtOH_4h
CSF1	12	5	DEG_GSE131565; DEG_GSE168797_Mock_CBDV; DEG_GSE179661_MHCC97H; DEG_GSE272113_CBD; DEG_GSE272113_sCBD	7	DEG_GSE168797_Mock_CBD; DEG_GSE179661_HepG2; DEG_GSE201508_cGAMP; DEG_GSE235310_LPS; DEG_GSE235310_Veh; DEG_GSE274435_DMSO_24h; DEG_GSE274859_LPS_24h
CTSB	12	4	DEG_GSE131565; DEG_GSE151512_12h; DEG_GSE179661_MHCC97H; DEG_GSE261716_CBD0.2_28d	8	DEG_GSE168797_Mock_CBD; DEG_GSE168797_SARS_CBD; DEG_GSE201508_cGAMP; DEG_GSE201508_enthanol; DEG_GSE235310_LPS; DEG_GSE272113_CBD; DEG_GSE272113_sCBD; DEG_GSE274859_LPS_24h
CTSD	12	0	NA	12	DEG_GSE131565; DEG_GSE152088; DEG_GSE168797_Mock_CBD; DEG_GSE168797_SARS_CBD; DEG_GSE168797_SARS_CBDV; DEG_GSE179661_HepG2; DEG_GSE179661_MHCC97H; DEG_GSE201508_cGAMP; DEG_GSE201508_enthanol; DEG_GSE235310_LPS; DEG_GSE235310_Veh; DEG_GSE274859_LPS_24h
CTSL	12	1	DEG_GSE179661_MHCC97H	11	DEG_GSE131565; DEG_GSE151512_12h; DEG_GSE151512_24h; DEG_GSE168797_Mock_CBD; DEG_GSE168797_SARS_CBD; DEG_GSE168797_SARS_CBDV; DEG_GSE179661_HepG2; DEG_GSE201508_cGAMP; DEG_GSE201508_enthanol; DEG_GSE235310_LPS; DEG_GSE235310_Veh
DAZAP2	12	4	DEG_GSE151512_12h; DEG_GSE151512_24h; DEG_GSE151512_6h; DEG_GSE235310_Veh	8	DEG_GSE131565; DEG_GSE168797_Mock_CBD; DEG_GSE168797_SARS_CBD; DEG_GSE168797_SARS_CBDV; DEG_GSE179661_HepG2; DEG_GSE179661_MHCC97H; DEG_GSE272113_sCBD; DEG_GSE274859_LPS_24h
DRAM2	12	1	DEG_GSE179661_HepG2	11	DEG_GSE131565; DEG_GSE151512_12h; DEG_GSE151512_24h; DEG_GSE168797_SARS_CBD; DEG_GSE179661_MHCC97H; DEG_GSE201508_cGAMP; DEG_GSE235310_LPS; DEG_GSE235310_Veh; DEG_GSE261716_CBD0.2_28d; DEG_GSE261716_CBD20_28d; DEG_GSE274859_LPS_24h
EFNA1	12	4	DEG_GSE168797_Mock_CBD; DEG_GSE168797_SARS_CBD; DEG_GSE168797_SARS_CBDV; DEG_GSE261716_CBD20_28d	8	DEG_GSE131565; DEG_GSE151512_24h; DEG_GSE152088; DEG_GSE168797_Mock_CBDV; DEG_GSE179661_HepG2; DEG_GSE179661_MHCC97H; DEG_GSE272113_CBD; DEG_GSE272113_sCBD
EFNB2	12	8	DEG_GSE131565; DEG_GSE151512_12h; DEG_GSE151512_24h; DEG_GSE151512_3h; DEG_GSE151512_6h; DEG_GSE235310_LPS; DEG_GSE272113_CBD; DEG_GSE272113_sCBD	4	DEG_GSE168797_Mock_CBD; DEG_GSE168797_SARS_CBD; DEG_GSE179661_HepG2; DEG_GSE274859_LPS_24h
EGLN1	12	8	DEG_GSE151512_12h; DEG_GSE151512_24h; DEG_GSE151512_6h; DEG_GSE168797_Mock_CBD; DEG_GSE168797_SARS_CBD; DEG_GSE168797_SARS_CBDV; DEG_GSE179661_MHCC97H; DEG_GSE274859_LPS_24h	4	DEG_GSE168797_Mock_CBDV; DEG_GSE179661_HepG2; DEG_GSE272113_CBD; DEG_GSE272113_sCBD
ERG28	12	5	DEG_GSE131565; DEG_GSE179661_HepG2; DEG_GSE179661_MHCC97H; DEG_GSE235310_LPS; DEG_GSE235310_Veh	7	DEG_GSE151512_12h; DEG_GSE151512_24h; DEG_GSE151512_6h; DEG_GSE168797_Mock_CBDV; DEG_GSE201508_cGAMP; DEG_GSE261716_CBD20_2d; DEG_GSE272113_sCBD
ETS1	12	3	DEG_GSE168797_Mock_CBDV; DEG_GSE235310_LPS; DEG_GSE261716_CBD0.2_2d	9	DEG_GSE151512_12h; DEG_GSE151512_24h; DEG_GSE151512_3h; DEG_GSE151512_6h; DEG_GSE168797_Mock_CBD; DEG_GSE168797_SARS_CBD; DEG_GSE179661_HepG2; DEG_GSE179661_MHCC97H; DEG_GSE272113_CBD
EXO1	12	10	DEG_GSE131565; DEG_GSE151512_12h; DEG_GSE151512_24h; DEG_GSE168797_Mock_CBD; DEG_GSE168797_SARS_CBD; DEG_GSE179661_HepG2; DEG_GSE179661_MHCC97H; DEG_GSE270378_CBD0.325_24h; DEG_GSE270378_CBD1.5_24h; DEG_GSE274859_LPS_24h	2	DEG_GSE266113_WT; DEG_GSE272113_sCBD
EZR	12	7	DEG_GSE168797_Mock_CBD; DEG_GSE168797_SARS_CBD; DEG_GSE201508_cGAMP; DEG_GSE201508_enthanol; DEG_GSE235310_LPS; DEG_GSE235310_Veh; DEG_GSE266113_mutNdufs4	5	DEG_GSE151512_24h; DEG_GSE179661_HepG2; DEG_GSE179661_MHCC97H; DEG_GSE272113_CBD; DEG_GSE272113_sCBD
FAM162A	12	8	DEG_GSE131565; DEG_GSE151512_12h; DEG_GSE151512_24h; DEG_GSE168797_Mock_CBD; DEG_GSE179661_HepG2; DEG_GSE235310_LPS; DEG_GSE274435_DMSO_24h; DEG_GSE274859_LPS_24h	4	DEG_GSE168797_Mock_CBDV; DEG_GSE179661_MHCC97H; DEG_GSE261716_CBD20_2d; DEG_GSE272113_sCBD
FAM222A	12	8	DEG_GSE179661_MHCC97H; DEG_GSE201508_cGAMP; DEG_GSE261716_CBD0.2_28d; DEG_GSE261716_CBD0.2_2d; DEG_GSE261716_CBD10_28d; DEG_GSE261716_CBD10_2d; DEG_GSE261716_CBD20_28d; DEG_GSE261716_CBD20_2d	4	DEG_GSE131565; DEG_GSE151512_12h; DEG_GSE151512_24h; DEG_GSE179661_HepG2
FDFT1	12	4	DEG_GSE131565; DEG_GSE235310_LPS; DEG_GSE235310_Veh; DEG_GSE274859_LPS_24h	8	DEG_GSE151512_12h; DEG_GSE151512_24h; DEG_GSE151512_6h; DEG_GSE168797_SARS_CBD; DEG_GSE201508_cGAMP; DEG_GSE201508_enthanol; DEG_GSE272113_CBD; DEG_GSE272113_sCBD
FDPS	12	4	DEG_GSE179661_MHCC97H; DEG_GSE235310_LPS; DEG_GSE235310_Veh; DEG_GSE274859_LPS_24h	8	DEG_GSE151512_12h; DEG_GSE151512_24h; DEG_GSE168797_SARS_CBD; DEG_GSE168797_SARS_CBDV; DEG_GSE201508_cGAMP; DEG_GSE201508_enthanol; DEG_GSE272113_CBD; DEG_GSE272113_sCBD
FMNL1	12	8	DEG_GSE168797_SARS_CBDV; DEG_GSE201508_enthanol; DEG_GSE235310_LPS; DEG_GSE235310_Veh; DEG_GSE272113_CBD; DEG_GSE272113_sCBD; DEG_GSE274859_LPS_24h; GSE70689_CBD_wLPS	4	DEG_GSE131565; DEG_GSE168797_Mock_CBD; DEG_GSE168797_Mock_CBDV; DEG_GSE179661_HepG2
FOSL2	12	6	DEG_GSE151512_12h; DEG_GSE151512_24h; DEG_GSE151512_6h; DEG_GSE168797_SARS_CBD; DEG_GSE168797_SARS_CBDV; DEG_GSE235310_Veh	6	DEG_GSE152088; DEG_GSE168797_Mock_CBDV; DEG_GSE179661_HepG2; DEG_GSE179661_MHCC97H; DEG_GSE235310_LPS; DEG_GSE272113_CBD
FOXRED2	12	8	DEG_GSE131565; DEG_GSE151512_24h; DEG_GSE151512_6h; DEG_GSE168797_Mock_CBD; DEG_GSE168797_Mock_CBDV; DEG_GSE168797_SARS_CBD; DEG_GSE179661_HepG2; DEG_GSE179661_MHCC97H	4	DEG_GSE235310_LPS; DEG_GSE272113_CBD; DEG_GSE272113_sCBD; DEG_GSE274859_LPS_24h
GARS1	12	1	DEG_GSE152088	11	DEG_GSE131565; DEG_GSE151512_12h; DEG_GSE151512_24h; DEG_GSE151512_3h; DEG_GSE151512_6h; DEG_GSE168797_Mock_CBD; DEG_GSE168797_SARS_CBD; DEG_GSE179661_HepG2; DEG_GSE179661_MHCC97H; DEG_GSE201508_cGAMP; DEG_GSE235310_Veh
GBA	12	5	DEG_GSE151512_12h; DEG_GSE151512_24h; DEG_GSE179661_HepG2; DEG_GSE179661_MHCC97H; DEG_GSE232624_Veh_CBD0.75_12h	7	DEG_GSE168797_SARS_CBD; DEG_GSE168797_SARS_CBDV; DEG_GSE235310_LPS; DEG_GSE235310_Veh; DEG_GSE272113_CBD; DEG_GSE272113_sCBD; DEG_GSE274859_LPS_24h
GCH1	12	0	NA	12	DEG_GSE131565; DEG_GSE151512_12h; DEG_GSE151512_24h; DEG_GSE151512_6h; DEG_GSE168797_Mock_CBD; DEG_GSE168797_SARS_CBD; DEG_GSE235310_LPS; DEG_GSE235310_Veh; DEG_GSE261716_CBD0.2_28d; DEG_GSE261716_CBD10_28d; DEG_GSE261716_CBD20_28d; DEG_GSE272113_sCBD
GLA	12	5	DEG_GSE131565; DEG_GSE151512_12h; DEG_GSE151512_24h; DEG_GSE151512_6h; DEG_GSE179661_MHCC97H	7	DEG_GSE168797_Mock_CBD; DEG_GSE168797_SARS_CBD; DEG_GSE168797_SARS_CBDV; DEG_GSE235310_LPS; DEG_GSE272113_CBD; DEG_GSE272113_sCBD; DEG_GSE274859_LPS_24h
GNS	12	3	DEG_GSE151512_12h; DEG_GSE151512_6h; DEG_GSE179661_HepG2	9	DEG_GSE131565; DEG_GSE168797_Mock_CBD; DEG_GSE168797_SARS_CBD; DEG_GSE168797_SARS_CBDV; DEG_GSE201508_cGAMP; DEG_GSE235310_LPS; DEG_GSE272113_CBD; DEG_GSE272113_sCBD; DEG_GSE274859_LPS_24h
GPCPD1	12	2	DEG_GSE168797_SARS_CBDV; DEG_GSE261716_CBD0.2_2d	10	DEG_GSE131565; DEG_GSE168797_Mock_CBD; DEG_GSE179661_HepG2; DEG_GSE179661_MHCC97H; DEG_GSE232624_EtOH0.75_CBD0.75_6h; DEG_GSE235310_LPS; DEG_GSE235310_Veh; DEG_GSE261716_CBD0.2_28d; DEG_GSE261716_CBD10_28d; DEG_GSE261716_CBD20_28d
GPNMB	12	0	NA	12	DEG_GSE131565; DEG_GSE168797_Mock_CBD; DEG_GSE168797_SARS_CBD; DEG_GSE168797_SARS_CBDV; DEG_GSE179661_MHCC97H; DEG_GSE201508_cGAMP; DEG_GSE201508_enthanol; DEG_GSE235310_LPS; DEG_GSE235310_Veh; DEG_GSE272113_CBD; DEG_GSE272113_sCBD; DEG_GSE274859_LPS_24h
GTPBP2	12	1	DEG_GSE261716_CBD0.2_2d	11	DEG_GSE131565; DEG_GSE168797_Mock_CBD; DEG_GSE168797_SARS_CBD; DEG_GSE179661_HepG2; DEG_GSE179661_MHCC97H; DEG_GSE235310_LPS; DEG_GSE235310_Veh; DEG_GSE272113_CBD; DEG_GSE274859_LPS_24h; GSE70689_CBD_NoLPS; GSE70689_CBD_wLPS
HDAC5	12	5	DEG_GSE168797_SARS_CBDV; DEG_GSE261716_CBD20_28d; DEG_GSE261716_CBD20_2d; DEG_GSE270378_CBD0.75_24h; DEG_GSE274859_LPS_24h	7	DEG_GSE131565; DEG_GSE168797_Mock_CBD; DEG_GSE179661_HepG2; DEG_GSE179661_MHCC97H; DEG_GSE270378_CBD0.325_6h; DEG_GSE272113_CBD; DEG_GSE272113_sCBD
HIP1	12	9	DEG_GSE131565; DEG_GSE168797_Mock_CBD; DEG_GSE168797_SARS_CBD; DEG_GSE179661_MHCC97H; DEG_GSE201508_cGAMP; DEG_GSE201508_enthanol; DEG_GSE272113_CBD; DEG_GSE272113_sCBD; DEG_GSE274859_LPS_24h	3	DEG_GSE151512_24h; DEG_GSE235310_LPS; DEG_GSE266113_WT
HM13	12	1	DEG_GSE261716_CBD20_28d	11	DEG_GSE131565; DEG_GSE168797_Mock_CBD; DEG_GSE168797_SARS_CBD; DEG_GSE179661_HepG2; DEG_GSE179661_MHCC97H; DEG_GSE201508_cGAMP; DEG_GSE235310_LPS; DEG_GSE235310_Veh; DEG_GSE272113_CBD; DEG_GSE272113_sCBD; DEG_GSE274859_LPS_24h
HNRNPF	12	7	DEG_GSE131565; DEG_GSE151512_24h; DEG_GSE168797_Mock_CBD; DEG_GSE168797_SARS_CBD; DEG_GSE179661_MHCC97H; DEG_GSE201508_cGAMP; DEG_GSE274859_LPS_24h	5	DEG_GSE179661_HepG2; DEG_GSE266113_WT; DEG_GSE272113_CBD; DEG_GSE272113_sCBD; DEG_GSE274435_DMSO_24h
HPRT1	12	8	DEG_GSE131565; DEG_GSE152088; DEG_GSE168797_Mock_CBD; DEG_GSE168797_SARS_CBD; DEG_GSE179661_MHCC97H; DEG_GSE235310_LPS; DEG_GSE235310_Veh; DEG_GSE274859_LPS_24h	4	DEG_GSE261716_CBD0.2_28d; DEG_GSE261716_CBD20_28d; DEG_GSE261716_CBD20_2d; DEG_GSE266113_WT
HS1BP3	12	1	DEG_GSE168797_Mock_CBDV	11	DEG_GSE131565; DEG_GSE151512_24h; DEG_GSE152088; DEG_GSE168797_Mock_CBD; DEG_GSE168797_SARS_CBD; DEG_GSE168797_SARS_CBDV; DEG_GSE201508_cGAMP; DEG_GSE201508_enthanol; DEG_GSE272113_CBD; DEG_GSE272113_sCBD; DEG_GSE274859_LPS_24h
HSD17B7	12	3	DEG_GSE235310_LPS; DEG_GSE235310_Veh; DEG_GSE274859_LPS_24h	9	DEG_GSE131565; DEG_GSE151512_12h; DEG_GSE151512_24h; DEG_GSE168797_Mock_CBD; DEG_GSE168797_Mock_CBDV; DEG_GSE168797_SARS_CBD; DEG_GSE201508_cGAMP; DEG_GSE272113_CBD; DEG_GSE272113_sCBD
HSPG2	12	10	DEG_GSE131565; DEG_GSE151512_6h; DEG_GSE168797_Mock_CBD; DEG_GSE168797_SARS_CBD; DEG_GSE179661_HepG2; DEG_GSE179661_MHCC97H; DEG_GSE235310_Veh; DEG_GSE261716_CBD20_28d; DEG_GSE272113_CBD; DEG_GSE272113_sCBD	2	DEG_GSE151512_24h; DEG_GSE274859_LPS_24h
HYOU1	12	2	DEG_GSE235310_LPS; DEG_GSE261716_CBD20_28d	10	DEG_GSE131565; DEG_GSE168797_Mock_CBD; DEG_GSE168797_SARS_CBD; DEG_GSE179661_HepG2; DEG_GSE179661_MHCC97H; DEG_GSE201508_cGAMP; DEG_GSE201508_enthanol; DEG_GSE272113_CBD; DEG_GSE272113_sCBD; DEG_GSE274859_LPS_24h
IL1R1	12	8	DEG_GSE131565; DEG_GSE168797_Mock_CBD; DEG_GSE179661_HepG2; DEG_GSE179661_MHCC97H; DEG_GSE235310_LPS; DEG_GSE235310_Veh; DEG_GSE272113_CBD; DEG_GSE272113_sCBD	4	DEG_GSE151512_24h; DEG_GSE261716_CBD0.2_28d; DEG_GSE261716_CBD20_28d; DEG_GSE274435_DMSO_24h
IL1RN	12	2	DEG_GSE179661_HepG2; DEG_GSE201508_cGAMP	10	DEG_GSE131565; DEG_GSE179661_MHCC97H; DEG_GSE235310_LPS; DEG_GSE235310_Veh; DEG_GSE261716_CBD0.2_28d; DEG_GSE261716_CBD20_28d; DEG_GSE270378_CBD0.325_24h; DEG_GSE270378_CBD0.75_24h; DEG_GSE270378_CBD1.5_24h; DEG_GSE274859_LPS_24h
JAG2	12	8	DEG_GSE131565; DEG_GSE168797_Mock_CBD; DEG_GSE168797_SARS_CBD; DEG_GSE179661_MHCC97H; DEG_GSE235310_LPS; DEG_GSE235310_Veh; DEG_GSE274435_DMSO_24h; DEG_GSE274859_LPS_24h	4	DEG_GSE151512_12h; DEG_GSE151512_24h; DEG_GSE152088; DEG_GSE179661_HepG2
JUNB	12	4	DEG_GSE168797_SARS_CBD; DEG_GSE168797_SARS_CBDV; DEG_GSE201508_cGAMP; DEG_GSE235310_LPS	8	DEG_GSE131565; DEG_GSE151512_12h; DEG_GSE151512_24h; DEG_GSE152088; DEG_GSE179661_HepG2; DEG_GSE179661_MHCC97H; DEG_GSE272113_CBD; DEG_GSE272113_sCBD
KIZ	12	3	DEG_GSE151512_3h; DEG_GSE179661_HepG2; DEG_GSE266113_WT	9	DEG_GSE131565; DEG_GSE151512_12h; DEG_GSE151512_24h; DEG_GSE168797_Mock_CBD; DEG_GSE168797_SARS_CBD; DEG_GSE179661_MHCC97H; DEG_GSE232624_EtOH0.25_CBD0.75_6h; DEG_GSE232624_EtOH0.75_CBD0.75_6h; DEG_GSE274859_LPS_24h
KLHL24	12	3	DEG_GSE232624_Veh_CBD0.75_12h; DEG_GSE261716_CBD0.2_2d; DEG_GSE266113_WT	9	DEG_GSE131565; DEG_GSE151512_24h; DEG_GSE152088; DEG_GSE168797_Mock_CBD; DEG_GSE168797_SARS_CBD; DEG_GSE179661_HepG2; DEG_GSE179661_MHCC97H; DEG_GSE201508_cGAMP; DEG_GSE235310_LPS
LGALS8	12	0	NA	12	DEG_GSE131565; DEG_GSE151512_24h; DEG_GSE151512_6h; DEG_GSE168797_Mock_CBD; DEG_GSE168797_SARS_CBD; DEG_GSE179661_MHCC97H; DEG_GSE201508_cGAMP; DEG_GSE235310_LPS; DEG_GSE261716_CBD0.2_28d; DEG_GSE261716_CBD20_28d; DEG_GSE274435_DMSO_24h; DEG_GSE274859_LPS_24h
LGR4	12	7	DEG_GSE131565; DEG_GSE168797_Mock_CBD; DEG_GSE168797_SARS_CBD; DEG_GSE168797_SARS_CBDV; DEG_GSE179661_HepG2; DEG_GSE179661_MHCC97H; DEG_GSE235310_Veh	5	DEG_GSE151512_12h; DEG_GSE151512_24h; DEG_GSE168797_Mock_CBDV; DEG_GSE272113_CBD; DEG_GSE272113_sCBD
LRRC8A	12	6	DEG_GSE151512_12h; DEG_GSE151512_24h; DEG_GSE151512_6h; DEG_GSE168797_Mock_CBD; DEG_GSE168797_SARS_CBD; DEG_GSE261716_CBD20_28d	6	DEG_GSE131565; DEG_GSE179661_HepG2; DEG_GSE235310_LPS; DEG_GSE272113_CBD; DEG_GSE272113_sCBD; DEG_GSE274859_LPS_24h
LURAP1L	12	5	DEG_GSE151512_12h; DEG_GSE151512_24h; DEG_GSE151512_6h; DEG_GSE272113_CBD; DEG_GSE272113_sCBD	7	DEG_GSE131565; DEG_GSE168797_Mock_CBD; DEG_GSE168797_SARS_CBD; DEG_GSE179661_HepG2; DEG_GSE179661_MHCC97H; DEG_GSE201508_cGAMP; DEG_GSE261716_CBD0.2_28d
LZTFL1	12	3	DEG_GSE179661_HepG2; DEG_GSE232624_Veh_CBD0.75_12h; DEG_GSE232624_Veh_CBD3_12h	9	DEG_GSE131565; DEG_GSE168797_Mock_CBD; DEG_GSE168797_SARS_CBD; DEG_GSE179661_MHCC97H; DEG_GSE201508_cGAMP; DEG_GSE201508_enthanol; DEG_GSE261716_CBD20_28d; DEG_GSE261716_CBD20_2d; DEG_GSE274859_LPS_24h
MAFK	12	2	DEG_GSE168797_SARS_CBDV; DEG_GSE232624_EtOH0.75_CBD0.75_12h	10	DEG_GSE131565; DEG_GSE151512_24h; DEG_GSE152088; DEG_GSE179661_HepG2; DEG_GSE179661_MHCC97H; DEG_GSE235310_LPS; DEG_GSE235310_Veh; DEG_GSE272113_CBD; DEG_GSE272113_sCBD; DEG_GSE274859_LPS_24h
MAGED2	12	5	DEG_GSE151512_24h; DEG_GSE232624_Veh_CBD3_12h; DEG_GSE232624_Veh_CBD3_6h; DEG_GSE235310_LPS; DEG_GSE235310_Veh	7	DEG_GSE131565; DEG_GSE168797_SARS_CBD; DEG_GSE179661_HepG2; DEG_GSE179661_MHCC97H; DEG_GSE201508_cGAMP; DEG_GSE232624_EtOH0.25_CBD0.75_12h; DEG_GSE261716_CBD20_28d
MAP1LC3B	12	0	NA	12	DEG_GSE131565; DEG_GSE168797_Mock_CBD; DEG_GSE168797_SARS_CBD; DEG_GSE179661_HepG2; DEG_GSE179661_MHCC97H; DEG_GSE201508_cGAMP; DEG_GSE235310_Veh; DEG_GSE261716_CBD0.2_28d; DEG_GSE261716_CBD20_28d; DEG_GSE261716_CBD20_2d; DEG_GSE270378_CBD0.75_24h; DEG_GSE274859_LPS_24h
MARCKSL1	12	12	DEG_GSE131565; DEG_GSE151512_12h; DEG_GSE151512_24h; DEG_GSE151512_6h; DEG_GSE168797_Mock_CBD; DEG_GSE179661_MHCC97H; DEG_GSE201508_cGAMP; DEG_GSE235310_LPS; DEG_GSE235310_Veh; DEG_GSE272113_CBD; DEG_GSE272113_sCBD; DEG_GSE274859_LPS_24h	0	NA
MAT2A	12	7	DEG_GSE131565; DEG_GSE152088; DEG_GSE179661_HepG2; DEG_GSE179661_MHCC97H; DEG_GSE201508_enthanol; DEG_GSE235310_LPS; DEG_GSE272113_CBD	5	DEG_GSE151512_12h; DEG_GSE261716_CBD0.2_28d; DEG_GSE261716_CBD0.2_2d; DEG_GSE261716_CBD20_28d; DEG_GSE261716_CBD20_2d
MCM10	12	8	DEG_GSE131565; DEG_GSE151512_12h; DEG_GSE151512_24h; DEG_GSE168797_Mock_CBD; DEG_GSE168797_SARS_CBD; DEG_GSE179661_HepG2; DEG_GSE179661_MHCC97H; DEG_GSE274859_LPS_24h	4	DEG_GSE261716_CBD10_28d; DEG_GSE261716_CBD20_28d; DEG_GSE261716_CBD20_2d; DEG_GSE266113_WT
MCM6	12	10	DEG_GSE131565; DEG_GSE151512_12h; DEG_GSE151512_24h; DEG_GSE168797_Mock_CBD; DEG_GSE168797_SARS_CBD; DEG_GSE179661_HepG2; DEG_GSE179661_MHCC97H; DEG_GSE201508_cGAMP; DEG_GSE235310_Veh; DEG_GSE274859_LPS_24h	2	DEG_GSE272113_CBD; DEG_GSE272113_sCBD
MCM7	12	9	DEG_GSE131565; DEG_GSE151512_24h; DEG_GSE168797_Mock_CBD; DEG_GSE168797_SARS_CBD; DEG_GSE201508_cGAMP; DEG_GSE232624_EtOH0.75_CBD0.75_12h; DEG_GSE235310_LPS; DEG_GSE261716_CBD20_28d; DEG_GSE274859_LPS_24h	3	DEG_GSE179661_MHCC97H; DEG_GSE266113_WT; DEG_GSE272113_CBD
MXD4	12	7	DEG_GSE235310_Veh; DEG_GSE261716_CBD0.2_28d; DEG_GSE261716_CBD20_28d; DEG_GSE261716_CBD20_2d; DEG_GSE266113_WT; DEG_GSE272113_CBD; DEG_GSE272113_sCBD	5	DEG_GSE131565; DEG_GSE152088; DEG_GSE168797_SARS_CBD; DEG_GSE168797_SARS_CBDV; DEG_GSE179661_MHCC97H
MYORG	12	11	DEG_GSE131565; DEG_GSE151512_12h; DEG_GSE151512_6h; DEG_GSE168797_Mock_CBD; DEG_GSE168797_SARS_CBD; DEG_GSE179661_HepG2; DEG_GSE179661_MHCC97H; DEG_GSE235310_Veh; DEG_GSE261716_CBD0.2_28d; DEG_GSE272113_CBD; DEG_GSE272113_sCBD	1	DEG_GSE168797_Mock_CBDV
NOP10	12	1	DEG_GSE274859_LPS_24h	11	DEG_GSE168797_Mock_CBD; DEG_GSE168797_SARS_CBD; DEG_GSE168797_SARS_CBDV; DEG_GSE201508_cGAMP; DEG_GSE201508_enthanol; DEG_GSE232624_Veh_CBD3_12h; DEG_GSE235310_LPS; DEG_GSE235310_Veh; DEG_GSE261716_CBD0.2_2d; DEG_GSE261716_CBD20_2d; DEG_GSE272113_sCBD
NPC1	12	2	DEG_GSE168797_SARS_CBDV; DEG_GSE179661_MHCC97H	10	DEG_GSE131565; DEG_GSE151512_24h; DEG_GSE168797_Mock_CBD; DEG_GSE201508_cGAMP; DEG_GSE201508_enthanol; DEG_GSE235310_LPS; DEG_GSE235310_Veh; DEG_GSE272113_CBD; DEG_GSE272113_sCBD; DEG_GSE274859_LPS_24h
OAF	12	1	DEG_GSE235310_LPS	11	DEG_GSE131565; DEG_GSE151512_12h; DEG_GSE151512_24h; DEG_GSE168797_Mock_CBD; DEG_GSE168797_SARS_CBD; DEG_GSE168797_SARS_CBDV; DEG_GSE179661_HepG2; DEG_GSE179661_MHCC97H; DEG_GSE261716_CBD10_28d; DEG_GSE272113_CBD; DEG_GSE272113_sCBD
OTUD1	12	3	DEG_GSE272113_CBD; DEG_GSE272113_sCBD; DEG_GSE274859_LPS_24h	9	DEG_GSE131565; DEG_GSE151512_24h; DEG_GSE152088; DEG_GSE168797_Mock_CBD; DEG_GSE168797_SARS_CBD; DEG_GSE179661_HepG2; DEG_GSE179661_MHCC97H; DEG_GSE235310_LPS; DEG_GSE235310_Veh
PBXIP1	12	9	DEG_GSE151512_24h; DEG_GSE235310_LPS; DEG_GSE235310_Veh; DEG_GSE261716_CBD20_28d; DEG_GSE261716_CBD20_2d; DEG_GSE266113_WT; DEG_GSE272113_CBD; DEG_GSE272113_sCBD; DEG_GSE274859_LPS_24h	3	DEG_GSE152088; DEG_GSE168797_SARS_CBD; DEG_GSE168797_SARS_CBDV
PDLIM2	12	9	DEG_GSE131565; DEG_GSE151512_24h; DEG_GSE168797_Mock_CBD; DEG_GSE168797_SARS_CBD; DEG_GSE201508_cGAMP; DEG_GSE235310_Veh; DEG_GSE272113_CBD; DEG_GSE272113_sCBD; DEG_GSE274859_LPS_24h	3	DEG_GSE152088; DEG_GSE179661_HepG2; DEG_GSE179661_MHCC97H
PDLIM5	12	8	DEG_GSE151512_12h; DEG_GSE151512_24h; DEG_GSE152088; DEG_GSE168797_Mock_CBD; DEG_GSE168797_SARS_CBD; DEG_GSE168797_SARS_CBDV; DEG_GSE272113_CBD; DEG_GSE272113_sCBD	4	DEG_GSE168797_Mock_CBDV; DEG_GSE179661_HepG2; DEG_GSE179661_MHCC97H; DEG_GSE232624_EtOH0.25_CBD0.75_12h
PEG10	12	10	DEG_GSE131565; DEG_GSE151512_12h; DEG_GSE151512_24h; DEG_GSE168797_Mock_CBD; DEG_GSE168797_SARS_CBD; DEG_GSE168797_SARS_CBDV; DEG_GSE179661_HepG2; DEG_GSE272113_CBD; DEG_GSE272113_sCBD; DEG_GSE274859_LPS_24h	2	DEG_GSE168797_Mock_CBDV; DEG_GSE179661_MHCC97H
PINK1	12	4	DEG_GSE168797_Mock_CBDV; DEG_GSE266113_WT; DEG_GSE272113_CBD; DEG_GSE272113_sCBD	8	DEG_GSE131565; DEG_GSE151512_24h; DEG_GSE168797_SARS_CBD; DEG_GSE168797_SARS_CBDV; DEG_GSE179661_HepG2; DEG_GSE179661_MHCC97H; DEG_GSE235310_LPS; DEG_GSE235310_Veh
PLAUR	12	2	DEG_GSE232624_EtOH0.25_CBD0.75_12h; DEG_GSE274859_LPS_24h	10	DEG_GSE131565; DEG_GSE168797_Mock_CBD; DEG_GSE168797_SARS_CBD; DEG_GSE179661_HepG2; DEG_GSE179661_MHCC97H; DEG_GSE201508_cGAMP; DEG_GSE235310_LPS; DEG_GSE266113_WT; DEG_GSE272113_CBD; DEG_GSE272113_sCBD
PLPP5	12	0	NA	12	DEG_GSE131565; DEG_GSE168797_Mock_CBD; DEG_GSE168797_SARS_CBD; DEG_GSE179661_HepG2; DEG_GSE179661_MHCC97H; DEG_GSE201508_cGAMP; DEG_GSE201508_enthanol; DEG_GSE235310_LPS; DEG_GSE235310_Veh; DEG_GSE261716_CBD20_28d; DEG_GSE272113_sCBD; DEG_GSE274859_LPS_24h
POLA1	12	10	DEG_GSE131565; DEG_GSE151512_12h; DEG_GSE151512_24h; DEG_GSE168797_Mock_CBD; DEG_GSE168797_SARS_CBD; DEG_GSE179661_HepG2; DEG_GSE235310_Veh; DEG_GSE261716_CBD10_28d; DEG_GSE261716_CBD20_28d; DEG_GSE274859_LPS_24h	2	DEG_GSE266113_WT; DEG_GSE272113_CBD
PRPF4	12	11	DEG_GSE131565; DEG_GSE151512_12h; DEG_GSE151512_24h; DEG_GSE151512_6h; DEG_GSE168797_Mock_CBD; DEG_GSE168797_SARS_CBD; DEG_GSE168797_SARS_CBDV; DEG_GSE179661_MHCC97H; DEG_GSE201508_cGAMP; DEG_GSE235310_LPS; DEG_GSE235310_Veh	1	DEG_GSE266113_WT
PSRC1	12	12	DEG_GSE131565; DEG_GSE151512_12h; DEG_GSE151512_24h; DEG_GSE151512_6h; DEG_GSE168797_Mock_CBD; DEG_GSE168797_SARS_CBD; DEG_GSE179661_HepG2; DEG_GSE179661_MHCC97H; DEG_GSE201508_cGAMP; DEG_GSE272113_CBD; DEG_GSE272113_sCBD; DEG_GSE274859_LPS_24h	0	NA
RND3	12	4	DEG_GSE151512_24h; DEG_GSE152088; DEG_GSE272113_CBD; DEG_GSE272113_sCBD	8	DEG_GSE168797_Mock_CBD; DEG_GSE168797_SARS_CBD; DEG_GSE179661_HepG2; DEG_GSE179661_MHCC97H; DEG_GSE201508_cGAMP; DEG_GSE201508_enthanol; DEG_GSE235310_LPS; DEG_GSE235310_Veh
RNF145	12	11	DEG_GSE151512_12h; DEG_GSE151512_24h; DEG_GSE151512_6h; DEG_GSE201508_cGAMP; DEG_GSE201508_enthanol; DEG_GSE235310_LPS; DEG_GSE235310_Veh; DEG_GSE272113_CBD; DEG_GSE272113_sCBD; DEG_GSE274435_DMSO_24h; DEG_GSE274435_EtOH_24h	1	DEG_GSE131565
RPS27L	12	4	DEG_GSE131565; DEG_GSE179661_HepG2; DEG_GSE235310_LPS; DEG_GSE272113_CBD	8	DEG_GSE151512_24h; DEG_GSE168797_SARS_CBD; DEG_GSE179661_MHCC97H; DEG_GSE201508_cGAMP; DEG_GSE201508_enthanol; DEG_GSE261716_CBD20_28d; DEG_GSE261716_CBD20_2d; DEG_GSE274435_DMSO_24h
S100A10	12	7	DEG_GSE131565; DEG_GSE168797_Mock_CBD; DEG_GSE235310_LPS; DEG_GSE235310_Veh; DEG_GSE272113_CBD; DEG_GSE272113_sCBD; DEG_GSE274859_LPS_24h	5	DEG_GSE179661_HepG2; DEG_GSE201508_cGAMP; DEG_GSE201508_enthanol; DEG_GSE261716_CBD0.2_2d; DEG_GSE261716_CBD20_28d
SAT1	12	0	NA	12	DEG_GSE131565; DEG_GSE151512_12h; DEG_GSE151512_24h; DEG_GSE168797_Mock_CBD; DEG_GSE168797_Mock_CBDV; DEG_GSE168797_SARS_CBD; DEG_GSE179661_HepG2; DEG_GSE179661_MHCC97H; DEG_GSE201508_cGAMP; DEG_GSE235310_Veh; DEG_GSE272113_sCBD; DEG_GSE274859_LPS_24h
SCARB1	12	9	DEG_GSE131565; DEG_GSE151512_6h; DEG_GSE168797_Mock_CBD; DEG_GSE168797_SARS_CBD; DEG_GSE179661_MHCC97H; DEG_GSE201508_cGAMP; DEG_GSE235310_Veh; DEG_GSE261716_CBD0.2_2d; DEG_GSE274859_LPS_24h	3	DEG_GSE151512_12h; DEG_GSE151512_24h; DEG_GSE272113_sCBD
SEC24D	12	1	DEG_GSE235310_Veh	11	DEG_GSE131565; DEG_GSE151512_24h; DEG_GSE168797_Mock_CBD; DEG_GSE168797_SARS_CBD; DEG_GSE168797_SARS_CBDV; DEG_GSE179661_HepG2; DEG_GSE179661_MHCC97H; DEG_GSE201508_cGAMP; DEG_GSE201508_enthanol; DEG_GSE235310_LPS; DEG_GSE274859_LPS_24h
SEC61A1	12	1	DEG_GSE151512_24h	11	DEG_GSE131565; DEG_GSE168797_Mock_CBD; DEG_GSE168797_SARS_CBD; DEG_GSE179661_HepG2; DEG_GSE179661_MHCC97H; DEG_GSE201508_cGAMP; DEG_GSE232624_EtOH0.25_CBD0.75_12h; DEG_GSE235310_LPS; DEG_GSE272113_CBD; DEG_GSE272113_sCBD; DEG_GSE274859_LPS_24h
SELENOS	12	0	NA	12	DEG_GSE131565; DEG_GSE151512_12h; DEG_GSE168797_Mock_CBD; DEG_GSE168797_SARS_CBD; DEG_GSE179661_HepG2; DEG_GSE179661_MHCC97H; DEG_GSE201508_cGAMP; DEG_GSE235310_Veh; DEG_GSE272113_CBD; DEG_GSE272113_sCBD; DEG_GSE274435_DMSO_24h; DEG_GSE274859_LPS_24h
SEPHS2	12	2	DEG_GSE179661_HepG2; DEG_GSE274859_LPS_24h	10	DEG_GSE131565; DEG_GSE168797_Mock_CBD; DEG_GSE168797_SARS_CBD; DEG_GSE168797_SARS_CBDV; DEG_GSE179661_MHCC97H; DEG_GSE235310_LPS; DEG_GSE235310_Veh; DEG_GSE261716_CBD20_2d; DEG_GSE272113_CBD; DEG_GSE272113_sCBD
SESN3	12	12	DEG_GSE131565; DEG_GSE151512_12h; DEG_GSE151512_24h; DEG_GSE151512_6h; DEG_GSE168797_SARS_CBD; DEG_GSE201508_cGAMP; DEG_GSE201508_enthanol; DEG_GSE235310_LPS; DEG_GSE235310_Veh; DEG_GSE261716_CBD0.2_2d; DEG_GSE272113_CBD; DEG_GSE272113_sCBD	0	NA
SLC38A6	12	3	DEG_GSE179661_HepG2; DEG_GSE179661_MHCC97H; DEG_GSE270378_CBD0.325_24h	9	DEG_GSE168797_Mock_CBD; DEG_GSE168797_SARS_CBD; DEG_GSE168797_SARS_CBDV; DEG_GSE201508_cGAMP; DEG_GSE201508_enthanol; DEG_GSE235310_LPS; DEG_GSE261716_CBD0.2_28d; DEG_GSE261716_CBD20_28d; DEG_GSE274859_LPS_24h
SNX8	12	3	DEG_GSE235310_Veh; DEG_GSE261716_CBD20_28d; DEG_GSE261716_CBD20_2d	9	DEG_GSE131565; DEG_GSE151512_24h; DEG_GSE168797_Mock_CBD; DEG_GSE179661_MHCC97H; DEG_GSE201508_cGAMP; DEG_GSE201508_enthanol; DEG_GSE232624_EtOH0.75_CBD0.75_6h; DEG_GSE235310_LPS; DEG_GSE274859_LPS_24h
SRSF3	12	8	DEG_GSE131565; DEG_GSE151512_12h; DEG_GSE151512_24h; DEG_GSE151512_6h; DEG_GSE168797_Mock_CBD; DEG_GSE201508_cGAMP; DEG_GSE235310_LPS; DEG_GSE274859_LPS_24h	4	DEG_GSE179661_HepG2; DEG_GSE179661_MHCC97H; DEG_GSE261716_CBD0.2_2d; DEG_GSE261716_CBD20_28d
STAT2	12	4	DEG_GSE151512_12h; DEG_GSE151512_24h; DEG_GSE179661_HepG2; DEG_GSE261716_CBD20_28d	8	DEG_GSE168797_Mock_CBD; DEG_GSE168797_SARS_CBD; DEG_GSE179661_MHCC97H; DEG_GSE201508_enthanol; DEG_GSE235310_LPS; DEG_GSE235310_Veh; DEG_GSE272113_CBD; DEG_GSE274859_LPS_24h
STC2	12	1	DEG_GSE168797_Mock_CBDV	11	DEG_GSE131565; DEG_GSE151512_12h; DEG_GSE151512_3h; DEG_GSE151512_6h; DEG_GSE168797_Mock_CBD; DEG_GSE168797_SARS_CBD; DEG_GSE168797_SARS_CBDV; DEG_GSE179661_HepG2; DEG_GSE179661_MHCC97H; DEG_GSE201508_cGAMP; DEG_GSE272113_sCBD
STOM	12	4	DEG_GSE131565; DEG_GSE261716_CBD0.2_28d; DEG_GSE261716_CBD20_28d; DEG_GSE261716_CBD20_2d	8	DEG_GSE151512_12h; DEG_GSE151512_24h; DEG_GSE168797_Mock_CBDV; DEG_GSE168797_SARS_CBD; DEG_GSE201508_cGAMP; DEG_GSE201508_enthanol; DEG_GSE235310_LPS; DEG_GSE274859_LPS_24h
SYNCRIP	12	10	DEG_GSE131565; DEG_GSE151512_12h; DEG_GSE151512_24h; DEG_GSE152088; DEG_GSE168797_Mock_CBD; DEG_GSE168797_SARS_CBD; DEG_GSE179661_HepG2; DEG_GSE179661_MHCC97H; DEG_GSE235310_Veh; DEG_GSE274859_LPS_24h	2	DEG_GSE272113_CBD; DEG_GSE272113_sCBD
SYNPO	12	10	DEG_GSE131565; DEG_GSE151512_24h; DEG_GSE168797_Mock_CBD; DEG_GSE168797_SARS_CBD; DEG_GSE168797_SARS_CBDV; DEG_GSE179661_MHCC97H; DEG_GSE235310_LPS; DEG_GSE272113_CBD; DEG_GSE272113_sCBD; DEG_GSE274859_LPS_24h	2	DEG_GSE179661_HepG2; DEG_GSE201508_cGAMP
TAGLN	12	9	DEG_GSE131565; DEG_GSE151512_3h; DEG_GSE151512_6h; DEG_GSE168797_Mock_CBD; DEG_GSE168797_SARS_CBD; DEG_GSE168797_SARS_CBDV; DEG_GSE179661_MHCC97H; DEG_GSE272113_CBD; DEG_GSE272113_sCBD	3	DEG_GSE232624_Veh_CBD0.75_6h; DEG_GSE232624_Veh_CBD3_6h; DEG_GSE235310_LPS
TGIF1	12	0	NA	12	DEG_GSE131565; DEG_GSE168797_Mock_CBD; DEG_GSE179661_HepG2; DEG_GSE179661_MHCC97H; DEG_GSE201508_cGAMP; DEG_GSE201508_enthanol; DEG_GSE235310_Veh; DEG_GSE272113_CBD; DEG_GSE272113_sCBD; DEG_GSE274435_DMSO_24h; DEG_GSE274435_EtOH_24h; DEG_GSE274859_LPS_24h
TIPARP	12	5	DEG_GSE168797_Mock_CBDV; DEG_GSE168797_SARS_CBD; DEG_GSE235310_LPS; DEG_GSE261716_CBD0.2_2d; DEG_GSE266113_mutNdufs4	7	DEG_GSE151512_12h; DEG_GSE151512_24h; DEG_GSE168797_Mock_CBD; DEG_GSE179661_HepG2; DEG_GSE179661_MHCC97H; DEG_GSE272113_sCBD; DEG_GSE274859_LPS_24h
TKT	12	6	DEG_GSE131565; DEG_GSE168797_Mock_CBD; DEG_GSE168797_SARS_CBD; DEG_GSE261716_CBD0.2_28d; DEG_GSE261716_CBD20_28d; DEG_GSE274859_LPS_24h	6	DEG_GSE151512_24h; DEG_GSE179661_HepG2; DEG_GSE235310_LPS; DEG_GSE235310_Veh; DEG_GSE272113_CBD; DEG_GSE272113_sCBD
TMEM41B	12	0	NA	12	DEG_GSE131565; DEG_GSE151512_12h; DEG_GSE151512_24h; DEG_GSE168797_Mock_CBD; DEG_GSE168797_SARS_CBD; DEG_GSE179661_HepG2; DEG_GSE179661_MHCC97H; DEG_GSE201508_cGAMP; DEG_GSE235310_Veh; DEG_GSE272113_CBD; DEG_GSE272113_sCBD; DEG_GSE274859_LPS_24h
TMSB4X	12	8	DEG_GSE151512_12h; DEG_GSE151512_24h; DEG_GSE168797_Mock_CBD; DEG_GSE179661_MHCC97H; DEG_GSE235310_LPS; DEG_GSE235310_Veh; DEG_GSE272113_CBD; DEG_GSE272113_sCBD	4	DEG_GSE179661_HepG2; DEG_GSE201508_cGAMP; DEG_GSE201508_enthanol; DEG_GSE232624_Veh_CBD3_12h
TPI1	12	10	DEG_GSE131565; DEG_GSE151512_12h; DEG_GSE151512_24h; DEG_GSE151512_6h; DEG_GSE168797_Mock_CBD; DEG_GSE179661_MHCC97H; DEG_GSE201508_cGAMP; DEG_GSE235310_Veh; DEG_GSE274435_DMSO_24h; DEG_GSE274859_LPS_24h	2	DEG_GSE272113_CBD; DEG_GSE272113_sCBD
TRIM25	12	4	DEG_GSE151512_12h; DEG_GSE168797_Mock_CBDV; DEG_GSE201508_cGAMP; DEG_GSE232624_Veh_CBD3_12h	8	DEG_GSE131565; DEG_GSE168797_Mock_CBD; DEG_GSE168797_SARS_CBD; DEG_GSE179661_HepG2; DEG_GSE179661_MHCC97H; DEG_GSE235310_LPS; DEG_GSE235310_Veh; DEG_GSE274859_LPS_24h
TSPAN4	12	5	DEG_GSE131565; DEG_GSE168797_Mock_CBD; DEG_GSE168797_SARS_CBD; DEG_GSE179661_MHCC97H; DEG_GSE274859_LPS_24h	7	DEG_GSE151512_12h; DEG_GSE151512_24h; DEG_GSE179661_HepG2; DEG_GSE232624_EtOH0.75_CBD0.75_6h; DEG_GSE235310_LPS; DEG_GSE272113_CBD; DEG_GSE272113_sCBD
TUBA1B	12	12	DEG_GSE131565; DEG_GSE151512_12h; DEG_GSE151512_24h; DEG_GSE168797_Mock_CBD; DEG_GSE168797_SARS_CBD; DEG_GSE179661_HepG2; DEG_GSE179661_MHCC97H; DEG_GSE235310_LPS; DEG_GSE235310_Veh; DEG_GSE261716_CBD0.2_28d; DEG_GSE261716_CBD20_28d; DEG_GSE274859_LPS_24h	0	NA
TUBA4A	12	8	DEG_GSE131565; DEG_GSE168797_Mock_CBD; DEG_GSE201508_cGAMP; DEG_GSE235310_Veh; DEG_GSE261716_CBD0.2_28d; DEG_GSE261716_CBD20_28d; DEG_GSE274435_EtOH_24h; DEG_GSE274859_LPS_24h	4	DEG_GSE151512_12h; DEG_GSE151512_24h; DEG_GSE235310_LPS; DEG_GSE261716_CBD0.2_2d
UBE2L6	12	4	DEG_GSE131565; DEG_GSE151512_24h; DEG_GSE179661_HepG2; DEG_GSE201508_cGAMP	8	DEG_GSE168797_Mock_CBD; DEG_GSE168797_SARS_CBD; DEG_GSE168797_SARS_CBDV; DEG_GSE179661_MHCC97H; DEG_GSE201508_enthanol; DEG_GSE235310_LPS; DEG_GSE235310_Veh; DEG_GSE274859_LPS_24h
UBE2N	12	10	DEG_GSE131565; DEG_GSE151512_12h; DEG_GSE151512_24h; DEG_GSE168797_Mock_CBD; DEG_GSE179661_MHCC97H; DEG_GSE235310_LPS; DEG_GSE235310_Veh; DEG_GSE272113_CBD; DEG_GSE272113_sCBD; DEG_GSE274859_LPS_24h	2	DEG_GSE261716_CBD20_28d; DEG_GSE261716_CBD20_2d
VWA1	12	10	DEG_GSE151512_24h; DEG_GSE151512_6h; DEG_GSE168797_Mock_CBD; DEG_GSE168797_SARS_CBD; DEG_GSE179661_MHCC97H; DEG_GSE235310_LPS; DEG_GSE235310_Veh; DEG_GSE266113_WT; DEG_GSE272113_CBD; DEG_GSE272113_sCBD	2	DEG_GSE152088; DEG_GSE179661_HepG2
XPOT	12	0	NA	12	DEG_GSE131565; DEG_GSE151512_12h; DEG_GSE151512_24h; DEG_GSE168797_Mock_CBD; DEG_GSE168797_SARS_CBD; DEG_GSE179661_MHCC97H; DEG_GSE201508_cGAMP; DEG_GSE235310_LPS; DEG_GSE235310_Veh; DEG_GSE272113_CBD; DEG_GSE272113_sCBD; DEG_GSE274859_LPS_24h
YARS1	12	0	NA	12	DEG_GSE131565; DEG_GSE151512_12h; DEG_GSE151512_24h; DEG_GSE151512_3h; DEG_GSE151512_6h; DEG_GSE168797_Mock_CBD; DEG_GSE168797_SARS_CBD; DEG_GSE179661_HepG2; DEG_GSE179661_MHCC97H; DEG_GSE201508_cGAMP; DEG_GSE235310_LPS; DEG_GSE235310_Veh
YPEL2	12	6	DEG_GSE235310_Veh; DEG_GSE261716_CBD0.2_28d; DEG_GSE261716_CBD10_28d; DEG_GSE261716_CBD20_28d; DEG_GSE275998_CDB10; DEG_GSE275998_CDB20	6	DEG_GSE131565; DEG_GSE151512_24h; DEG_GSE168797_Mock_CBD; DEG_GSE168797_SARS_CBD; DEG_GSE179661_MHCC97H; DEG_GSE274859_LPS_24h
ZC3H4	12	11	DEG_GSE131565; DEG_GSE151512_12h; DEG_GSE151512_24h; DEG_GSE151512_6h; DEG_GSE168797_Mock_CBD; DEG_GSE168797_SARS_CBD; DEG_GSE168797_SARS_CBDV; DEG_GSE179661_HepG2; DEG_GSE179661_MHCC97H; DEG_GSE232624_EtOH0.75_CBD0.75_6h; DEG_GSE232624_Veh_CBD3_12h	1	DEG_GSE232624_EtOH0.25_CBD0.75_12h
ZFP36L1	12	9	DEG_GSE131565; DEG_GSE168797_Mock_CBDV; DEG_GSE235310_LPS; DEG_GSE235310_Veh; DEG_GSE261716_CBD10_28d; DEG_GSE261716_CBD20_28d; DEG_GSE272113_CBD; DEG_GSE272113_sCBD; DEG_GSE274859_LPS_24h	3	DEG_GSE151512_24h; DEG_GSE179661_HepG2; DEG_GSE179661_MHCC97H
ZNF595	12	5	DEG_GSE131565; DEG_GSE168797_Mock_CBD; DEG_GSE168797_SARS_CBD; DEG_GSE235310_LPS; DEG_GSE272113_CBD	7	DEG_GSE261716_CBD0.2_2d; DEG_GSE261716_CBD20_28d; DEG_GSE261716_CBD20_2d; DEG_GSE272113_CBD; DEG_GSE274859_LPS_24h
ABL2	11	2	DEG_GSE168797_SARS_CBDV; DEG_GSE235310_Veh	9	DEG_GSE131565; DEG_GSE151512_24h; DEG_GSE168797_Mock_CBD; DEG_GSE179661_HepG2; DEG_GSE179661_MHCC97H; DEG_GSE201508_cGAMP; DEG_GSE201508_enthanol; DEG_GSE235310_LPS; DEG_GSE272113_CBD
ACLY	11	6	DEG_GSE131565; DEG_GSE168797_Mock_CBD; DEG_GSE168797_SARS_CBD; DEG_GSE179661_HepG2; DEG_GSE179661_MHCC97H; DEG_GSE274859_LPS_24h	5	DEG_GSE151512_12h; DEG_GSE151512_24h; DEG_GSE168797_Mock_CBDV; DEG_GSE272113_CBD; DEG_GSE272113_sCBD
ACSS2	11	5	DEG_GSE235310_LPS; DEG_GSE261716_CBD0.2_2d; DEG_GSE274435_DMSO_24h; DEG_GSE274435_EtOH_24h; DEG_GSE274859_LPS_24h	6	DEG_GSE131565; DEG_GSE151512_12h; DEG_GSE151512_24h; DEG_GSE168797_Mock_CBDV; DEG_GSE168797_SARS_CBD; DEG_GSE201508_cGAMP
ADAM17	11	1	DEG_GSE274859_LPS_24h	10	DEG_GSE131565; DEG_GSE151512_12h; DEG_GSE151512_24h; DEG_GSE168797_Mock_CBD; DEG_GSE168797_SARS_CBD; DEG_GSE179661_HepG2; DEG_GSE179661_MHCC97H; DEG_GSE201508_cGAMP; DEG_GSE201508_enthanol; DEG_GSE272113_CBD
AGTRAP	11	0	NA	11	DEG_GSE151512_12h; DEG_GSE151512_24h; DEG_GSE168797_Mock_CBD; DEG_GSE168797_SARS_CBD; DEG_GSE168797_SARS_CBDV; DEG_GSE179661_HepG2; DEG_GSE235310_LPS; DEG_GSE235310_Veh; DEG_GSE272113_CBD; DEG_GSE272113_sCBD; DEG_GSE274859_LPS_24h
AK4	11	5	DEG_GSE151512_12h; DEG_GSE151512_24h; DEG_GSE151512_6h; DEG_GSE179661_HepG2; DEG_GSE274859_LPS_24h	6	DEG_GSE168797_Mock_CBD; DEG_GSE168797_SARS_CBD; DEG_GSE235310_LPS; DEG_GSE235310_Veh; DEG_GSE272113_CBD; DEG_GSE272113_sCBD
AKNA	11	0	NA	11	DEG_GSE131565; DEG_GSE151512_12h; DEG_GSE151512_24h; DEG_GSE151512_3h; DEG_GSE168797_Mock_CBD; DEG_GSE168797_SARS_CBD; DEG_GSE179661_HepG2; DEG_GSE179661_MHCC97H; DEG_GSE235310_Veh; DEG_GSE272113_CBD; DEG_GSE274435_DMSO_24h
AKR1A1	11	0	NA	11	DEG_GSE131565; DEG_GSE151512_24h; DEG_GSE168797_Mock_CBD; DEG_GSE168797_SARS_CBD; DEG_GSE168797_SARS_CBDV; DEG_GSE179661_MHCC97H; DEG_GSE201508_cGAMP; DEG_GSE201508_enthanol; DEG_GSE235310_LPS; DEG_GSE261716_CBD0.2_2d; DEG_GSE274859_LPS_24h
ALDH1B1	11	10	DEG_GSE131565; DEG_GSE152088; DEG_GSE168797_Mock_CBD; DEG_GSE168797_SARS_CBD; DEG_GSE179661_HepG2; DEG_GSE179661_MHCC97H; DEG_GSE201508_cGAMP; DEG_GSE235310_Veh; DEG_GSE261716_CBD0.2_28d; DEG_GSE261716_CBD0.2_2d	1	DEG_GSE151512_24h
ALDH9A1	11	3	DEG_GSE131565; DEG_GSE168797_Mock_CBD; DEG_GSE274859_LPS_24h	8	DEG_GSE201508_cGAMP; DEG_GSE201508_enthanol; DEG_GSE235310_LPS; DEG_GSE261716_CBD0.2_28d; DEG_GSE261716_CBD10_28d; DEG_GSE261716_CBD20_28d; DEG_GSE272113_CBD; DEG_GSE272113_sCBD
AMDHD2	11	0	NA	11	DEG_GSE151512_12h; DEG_GSE168797_Mock_CBD; DEG_GSE168797_SARS_CBD; DEG_GSE201508_cGAMP; DEG_GSE201508_enthanol; DEG_GSE235310_Veh; DEG_GSE261716_CBD0.2_2d; DEG_GSE270378_CBD0.75_24h; DEG_GSE272113_CBD; DEG_GSE272113_sCBD; DEG_GSE274859_LPS_24h
ANXA4	11	4	DEG_GSE131565; DEG_GSE168797_Mock_CBD; DEG_GSE168797_SARS_CBD; DEG_GSE179661_HepG2	7	DEG_GSE151512_12h; DEG_GSE151512_24h; DEG_GSE201508_enthanol; DEG_GSE235310_LPS; DEG_GSE272113_CBD; DEG_GSE272113_sCBD; DEG_GSE274859_LPS_24h
ANXA5	11	0	NA	11	DEG_GSE131565; DEG_GSE168797_Mock_CBD; DEG_GSE168797_SARS_CBD; DEG_GSE179661_HepG2; DEG_GSE179661_MHCC97H; DEG_GSE201508_cGAMP; DEG_GSE201508_enthanol; DEG_GSE235310_LPS; DEG_GSE272113_CBD; DEG_GSE272113_sCBD; DEG_GSE274859_LPS_24h
APBB1IP	11	3	DEG_GSE168797_Mock_CBDV; DEG_GSE235310_Veh; DEG_GSE274859_LPS_24h	8	DEG_GSE168797_Mock_CBD; DEG_GSE168797_SARS_CBD; DEG_GSE168797_SARS_CBDV; DEG_GSE201508_cGAMP; DEG_GSE201508_enthanol; DEG_GSE235310_LPS; DEG_GSE272113_CBD; DEG_GSE272113_sCBD
ARNTL	11	7	DEG_GSE151512_12h; DEG_GSE151512_24h; DEG_GSE168797_SARS_CBDV; DEG_GSE261716_CBD10_28d; DEG_GSE261716_CBD20_28d; DEG_GSE275998_CDB10; DEG_GSE275998_CDB20	4	DEG_GSE131565; DEG_GSE179661_MHCC97H; DEG_GSE201508_cGAMP; DEG_GSE274859_LPS_24h
ASAP2	11	7	DEG_GSE131565; DEG_GSE168797_Mock_CBD; DEG_GSE168797_SARS_CBD; DEG_GSE261716_CBD0.2_2d; DEG_GSE261716_CBD10_28d; DEG_GSE261716_CBD20_28d; DEG_GSE261716_CBD20_2d	4	DEG_GSE179661_HepG2; DEG_GSE232624_EtOH0.75_CBD0.75_12h; DEG_GSE235310_LPS; DEG_GSE235310_Veh
ATG13	11	3	DEG_GSE168797_Mock_CBDV; DEG_GSE235310_LPS; DEG_GSE261716_CBD20_2d	8	DEG_GSE131565; DEG_GSE168797_Mock_CBD; DEG_GSE168797_SARS_CBD; DEG_GSE179661_HepG2; DEG_GSE179661_MHCC97H; DEG_GSE201508_cGAMP; DEG_GSE272113_CBD; DEG_GSE274859_LPS_24h
ATP6AP1	11	4	DEG_GSE151512_24h; DEG_GSE151512_6h; DEG_GSE179661_MHCC97H; DEG_GSE261716_CBD20_28d	7	DEG_GSE168797_SARS_CBD; DEG_GSE168797_SARS_CBDV; DEG_GSE235310_LPS; DEG_GSE235310_Veh; DEG_GSE272113_CBD; DEG_GSE272113_sCBD; DEG_GSE274859_LPS_24h
ATP6V1B2	11	2	DEG_GSE151512_12h; DEG_GSE151512_24h	9	DEG_GSE131565; DEG_GSE168797_SARS_CBD; DEG_GSE168797_SARS_CBDV; DEG_GSE201508_cGAMP; DEG_GSE201508_enthanol; DEG_GSE235310_LPS; DEG_GSE272113_CBD; DEG_GSE272113_sCBD; DEG_GSE274859_LPS_24h
ATP6V1H	11	0	NA	11	DEG_GSE131565; DEG_GSE151512_24h; DEG_GSE168797_Mock_CBD; DEG_GSE168797_SARS_CBD; DEG_GSE179661_HepG2; DEG_GSE179661_MHCC97H; DEG_GSE201508_cGAMP; DEG_GSE235310_LPS; DEG_GSE235310_Veh; DEG_GSE272113_sCBD; DEG_GSE274859_LPS_24h
B4GALNT1	11	5	DEG_GSE131565; DEG_GSE179661_MHCC97H; DEG_GSE235310_LPS; DEG_GSE274435_DMSO_24h; DEG_GSE274859_LPS_24h	6	DEG_GSE168797_Mock_CBD; DEG_GSE168797_SARS_CBD; DEG_GSE179661_HepG2; DEG_GSE201508_cGAMP; DEG_GSE272113_CBD; DEG_GSE272113_sCBD
B4GALT5	11	7	DEG_GSE151512_12h; DEG_GSE151512_24h; DEG_GSE151512_6h; DEG_GSE201508_cGAMP; DEG_GSE201508_enthanol; DEG_GSE274435_DMSO_24h; DEG_GSE274435_EtOH_24h	4	DEG_GSE179661_HepG2; DEG_GSE272113_CBD; DEG_GSE272113_sCBD; DEG_GSE274859_LPS_24h
BBC3	11	1	DEG_GSE168797_SARS_CBDV	10	DEG_GSE131565; DEG_GSE151512_24h; DEG_GSE152088; DEG_GSE168797_Mock_CBD; DEG_GSE168797_SARS_CBD; DEG_GSE179661_HepG2; DEG_GSE179661_MHCC97H; DEG_GSE235310_Veh; DEG_GSE274859_LPS_24h; GSE70689_CBD_NoLPS
BCAR3	11	4	DEG_GSE131565; DEG_GSE152088; DEG_GSE168797_Mock_CBDV; DEG_GSE168797_SARS_CBD	7	DEG_GSE151512_12h; DEG_GSE179661_HepG2; DEG_GSE179661_MHCC97H; DEG_GSE201508_cGAMP; DEG_GSE235310_LPS; DEG_GSE235310_Veh; DEG_GSE274435_DMSO_24h
BCAT1	11	1	DEG_GSE151512_24h	10	DEG_GSE131565; DEG_GSE168797_Mock_CBD; DEG_GSE168797_SARS_CBD; DEG_GSE168797_SARS_CBDV; DEG_GSE179661_HepG2; DEG_GSE201508_cGAMP; DEG_GSE235310_LPS; DEG_GSE235310_Veh; DEG_GSE272113_CBD; DEG_GSE272113_sCBD
BCL2L1	11	6	DEG_GSE151512_12h; DEG_GSE151512_24h; DEG_GSE168797_Mock_CBD; DEG_GSE168797_SARS_CBD; DEG_GSE179661_MHCC97H; DEG_GSE235310_LPS	5	DEG_GSE131565; DEG_GSE168797_Mock_CBDV; DEG_GSE179661_HepG2; DEG_GSE235310_Veh; DEG_GSE261716_CBD0.2_2d
BCL3	11	5	DEG_GSE168797_Mock_CBD; DEG_GSE168797_SARS_CBD; DEG_GSE168797_SARS_CBDV; DEG_GSE235310_LPS; DEG_GSE235310_Veh	6	DEG_GSE131565; DEG_GSE151512_24h; DEG_GSE179661_HepG2; DEG_GSE179661_MHCC97H; DEG_GSE272113_CBD; DEG_GSE272113_sCBD
BCL7C	11	9	DEG_GSE151512_24h; DEG_GSE168797_Mock_CBD; DEG_GSE168797_SARS_CBD; DEG_GSE201508_cGAMP; DEG_GSE235310_LPS; DEG_GSE235310_Veh; DEG_GSE261716_CBD0.2_28d; DEG_GSE261716_CBD20_28d; DEG_GSE274859_LPS_24h	2	DEG_GSE179661_HepG2; DEG_GSE261716_CBD0.2_2d
BIRC5	11	10	DEG_GSE131565; DEG_GSE151512_12h; DEG_GSE151512_24h; DEG_GSE151512_6h; DEG_GSE168797_Mock_CBD; DEG_GSE168797_SARS_CBD; DEG_GSE179661_HepG2; DEG_GSE179661_MHCC97H; DEG_GSE201508_cGAMP; DEG_GSE274859_LPS_24h	1	DEG_GSE232624_EtOH0.25_CBD0.75_12h
BMP1	11	9	DEG_GSE131565; DEG_GSE168797_Mock_CBD; DEG_GSE168797_SARS_CBD; DEG_GSE232624_Veh_CBD0.75_12h; DEG_GSE232624_Veh_CBD3_12h; DEG_GSE261716_CBD20_28d; DEG_GSE272113_CBD; DEG_GSE272113_sCBD; DEG_GSE274859_LPS_24h	2	DEG_GSE179661_HepG2; DEG_GSE235310_LPS
BNIP3L	11	2	DEG_GSE151512_12h; DEG_GSE151512_24h	9	DEG_GSE131565; DEG_GSE168797_Mock_CBD; DEG_GSE168797_SARS_CBD; DEG_GSE168797_SARS_CBDV; DEG_GSE179661_MHCC97H; DEG_GSE201508_cGAMP; DEG_GSE235310_LPS; DEG_GSE261716_CBD0.2_28d; DEG_GSE261716_CBD20_28d
BORCS6	11	4	DEG_GSE235310_LPS; DEG_GSE235310_Veh; DEG_GSE261716_CBD20_28d; DEG_GSE274859_LPS_24h	7	DEG_GSE131565; DEG_GSE151512_12h; DEG_GSE152088; DEG_GSE168797_Mock_CBD; DEG_GSE168797_SARS_CBD; DEG_GSE179661_HepG2; DEG_GSE179661_MHCC97H
CA12	11	6	DEG_GSE151512_12h; DEG_GSE151512_24h; DEG_GSE151512_6h; DEG_GSE179661_MHCC97H; DEG_GSE274435_DMSO_24h; DEG_GSE274859_LPS_24h	5	DEG_GSE168797_SARS_CBD; DEG_GSE168797_SARS_CBDV; DEG_GSE179661_HepG2; DEG_GSE235310_LPS; DEG_GSE266113_mutNdufs4
CASP2	11	10	DEG_GSE131565; DEG_GSE151512_12h; DEG_GSE151512_24h; DEG_GSE151512_6h; DEG_GSE168797_Mock_CBD; DEG_GSE168797_SARS_CBD; DEG_GSE179661_HepG2; DEG_GSE179661_MHCC97H; DEG_GSE235310_Veh; DEG_GSE274859_LPS_24h	1	DEG_GSE266113_WT
CBS	11	3	DEG_GSE274435_DMSO_24h; DEG_GSE274435_EtOH_24h; DEG_GSE274859_LPS_24h	8	DEG_GSE131565; DEG_GSE168797_Mock_CBD; DEG_GSE168797_SARS_CBD; DEG_GSE179661_MHCC97H; DEG_GSE201508_cGAMP; DEG_GSE232624_EtOH0.75_CBD0.75_6h; DEG_GSE235310_LPS; DEG_GSE235310_Veh
CCN1	11	6	DEG_GSE131565; DEG_GSE168797_SARS_CBD; DEG_GSE168797_SARS_CBDV; DEG_GSE261716_CBD0.2_28d; DEG_GSE272113_CBD; DEG_GSE272113_sCBD	5	DEG_GSE152088; DEG_GSE168797_Mock_CBD; DEG_GSE179661_HepG2; DEG_GSE179661_MHCC97H; DEG_GSE232624_Veh_CBD3_6h
CD81	11	9	DEG_GSE131565; DEG_GSE151512_12h; DEG_GSE151512_24h; DEG_GSE151512_6h; DEG_GSE168797_Mock_CBD; DEG_GSE201508_cGAMP; DEG_GSE261716_CBD20_28d; DEG_GSE272113_CBD; DEG_GSE272113_sCBD	2	DEG_GSE235310_LPS; DEG_GSE235310_Veh
CDC25A	11	10	DEG_GSE131565; DEG_GSE151512_24h; DEG_GSE168797_Mock_CBD; DEG_GSE168797_SARS_CBD; DEG_GSE179661_HepG2; DEG_GSE179661_MHCC97H; DEG_GSE201508_cGAMP; DEG_GSE201508_enthanol; DEG_GSE274859_LPS_24h; GSE70689_CBD_NoLPS	1	DEG_GSE266113_WT
CDCA5	11	10	DEG_GSE131565; DEG_GSE151512_12h; DEG_GSE151512_24h; DEG_GSE151512_6h; DEG_GSE168797_Mock_CBD; DEG_GSE168797_SARS_CBD; DEG_GSE179661_MHCC97H; DEG_GSE201508_cGAMP; DEG_GSE235310_LPS; DEG_GSE274859_LPS_24h	1	DEG_GSE266113_WT
CEBPA	11	3	DEG_GSE179661_MHCC97H; DEG_GSE201508_cGAMP; DEG_GSE274859_LPS_24h	8	DEG_GSE131565; DEG_GSE152088; DEG_GSE168797_Mock_CBD; DEG_GSE168797_SARS_CBD; DEG_GSE235310_LPS; DEG_GSE261716_CBD10_28d; DEG_GSE272113_CBD; DEG_GSE272113_sCBD
CHAF1B	11	8	DEG_GSE131565; DEG_GSE151512_24h; DEG_GSE168797_Mock_CBD; DEG_GSE168797_SARS_CBD; DEG_GSE179661_HepG2; DEG_GSE179661_MHCC97H; DEG_GSE201508_cGAMP; DEG_GSE274859_LPS_24h	3	DEG_GSE151512_3h; DEG_GSE272113_CBD; DEG_GSE272113_sCBD
CHD3	11	10	DEG_GSE131565; DEG_GSE168797_Mock_CBD; DEG_GSE168797_SARS_CBDV; DEG_GSE179661_MHCC97H; DEG_GSE232624_Veh_CBD3_12h; DEG_GSE235310_LPS; DEG_GSE261716_CBD10_28d; DEG_GSE261716_CBD20_28d; DEG_GSE272113_CBD; DEG_GSE272113_sCBD	1	DEG_GSE152088
CHML	11	10	DEG_GSE131565; DEG_GSE152088; DEG_GSE168797_Mock_CBD; DEG_GSE168797_SARS_CBD; DEG_GSE179661_HepG2; DEG_GSE179661_MHCC97H; DEG_GSE201508_cGAMP; DEG_GSE232624_EtOH0.25_CBD0.75_12h; DEG_GSE232624_EtOH0.75_CBD0.75_12h; DEG_GSE274859_LPS_24h	1	DEG_GSE235310_LPS
CITED2	11	5	DEG_GSE151512_12h; DEG_GSE151512_24h; DEG_GSE201508_cGAMP; DEG_GSE272113_CBD; DEG_GSE274435_DMSO_24h	6	DEG_GSE131565; DEG_GSE168797_Mock_CBD; DEG_GSE168797_SARS_CBD; DEG_GSE179661_HepG2; DEG_GSE179661_MHCC97H; DEG_GSE235310_LPS
CNBP	11	0	NA	11	DEG_GSE151512_12h; DEG_GSE151512_24h; DEG_GSE151512_3h; DEG_GSE151512_6h; DEG_GSE168797_Mock_CBD; DEG_GSE168797_SARS_CBD; DEG_GSE179661_MHCC97H; DEG_GSE201508_enthanol; DEG_GSE261716_CBD0.2_2d; DEG_GSE272113_sCBD; DEG_GSE274435_DMSO_24h
CNTNAP1	11	7	DEG_GSE131565; DEG_GSE151512_24h; DEG_GSE168797_Mock_CBD; DEG_GSE168797_SARS_CBD; DEG_GSE179661_MHCC97H; DEG_GSE235310_LPS; DEG_GSE274435_DMSO_24h	4	DEG_GSE261716_CBD0.2_28d; DEG_GSE261716_CBD20_28d; DEG_GSE272113_CBD; DEG_GSE272113_sCBD
COL18A1	11	10	DEG_GSE131565; DEG_GSE151512_12h; DEG_GSE151512_24h; DEG_GSE151512_6h; DEG_GSE168797_Mock_CBD; DEG_GSE179661_MHCC97H; DEG_GSE235310_Veh; DEG_GSE261716_CBD20_28d; DEG_GSE272113_CBD; DEG_GSE272113_sCBD	1	DEG_GSE152088
COLGALT1	11	8	DEG_GSE131565; DEG_GSE168797_Mock_CBD; DEG_GSE168797_SARS_CBD; DEG_GSE179661_HepG2; DEG_GSE179661_MHCC97H; DEG_GSE201508_cGAMP; DEG_GSE232624_EtOH0.75_CBD0.75_6h; DEG_GSE274859_LPS_24h	3	DEG_GSE235310_LPS; DEG_GSE272113_CBD; DEG_GSE272113_sCBD
COTL1	11	9	DEG_GSE131565; DEG_GSE168797_Mock_CBD; DEG_GSE168797_SARS_CBD; DEG_GSE201508_cGAMP; DEG_GSE235310_LPS; DEG_GSE235310_Veh; DEG_GSE261716_CBD0.2_28d; DEG_GSE272113_sCBD; DEG_GSE274859_LPS_24h	2	DEG_GSE151512_24h; DEG_GSE232624_Veh_CBD3_12h
CRABP2	11	2	DEG_GSE272113_CBD; DEG_GSE272113_sCBD	9	DEG_GSE131565; DEG_GSE151512_12h; DEG_GSE151512_24h; DEG_GSE151512_6h; DEG_GSE168797_Mock_CBD; DEG_GSE168797_SARS_CBD; DEG_GSE179661_HepG2; DEG_GSE235310_LPS; DEG_GSE235310_Veh
CSGALNACT2	11	0	NA	11	DEG_GSE131565; DEG_GSE151512_12h; DEG_GSE151512_24h; DEG_GSE168797_Mock_CBD; DEG_GSE168797_SARS_CBD; DEG_GSE179661_HepG2; DEG_GSE179661_MHCC97H; DEG_GSE201508_cGAMP; DEG_GSE235310_LPS; DEG_GSE235310_Veh; DEG_GSE274859_LPS_24h
CYP20A1	11	1	DEG_GSE232624_Veh_CBD3_12h	10	DEG_GSE131565; DEG_GSE168797_Mock_CBD; DEG_GSE168797_SARS_CBD; DEG_GSE179661_HepG2; DEG_GSE179661_MHCC97H; DEG_GSE201508_cGAMP; DEG_GSE235310_Veh; DEG_GSE272113_CBD; DEG_GSE272113_sCBD; DEG_GSE274435_DMSO_24h
CYP27A1	11	6	DEG_GSE131565; DEG_GSE168797_SARS_CBD; DEG_GSE168797_SARS_CBDV; DEG_GSE179661_HepG2; DEG_GSE179661_MHCC97H; DEG_GSE261716_CBD20_28d	5	DEG_GSE201508_cGAMP; DEG_GSE235310_LPS; DEG_GSE235310_Veh; DEG_GSE274859_LPS_24h; GSE70689_CBD_NoLPS
DAAM1	11	6	DEG_GSE151512_12h; DEG_GSE151512_6h; DEG_GSE152088; DEG_GSE235310_Veh; DEG_GSE261716_CBD10_28d; DEG_GSE272113_sCBD	5	DEG_GSE131565; DEG_GSE168797_Mock_CBD; DEG_GSE168797_SARS_CBD; DEG_GSE179661_HepG2; DEG_GSE179661_MHCC97H
DAB2	11	2	DEG_GSE266113_WT; GSE70689_CBD_NoLPS	9	DEG_GSE131565; DEG_GSE168797_Mock_CBDV; DEG_GSE168797_SARS_CBD; DEG_GSE179661_MHCC97H; DEG_GSE201508_cGAMP; DEG_GSE235310_LPS; DEG_GSE235310_Veh; DEG_GSE272113_CBD; DEG_GSE272113_sCBD
DCAF6	11	9	DEG_GSE131565; DEG_GSE151512_24h; DEG_GSE151512_6h; DEG_GSE168797_Mock_CBD; DEG_GSE168797_SARS_CBD; DEG_GSE179661_HepG2; DEG_GSE235310_LPS; DEG_GSE272113_CBD; DEG_GSE272113_sCBD	2	DEG_GSE261716_CBD0.2_28d; DEG_GSE274859_LPS_24h
DHCR7	11	5	DEG_GSE131565; DEG_GSE179661_MHCC97H; DEG_GSE235310_LPS; DEG_GSE261716_CBD20_28d; DEG_GSE274859_LPS_24h	6	DEG_GSE151512_12h; DEG_GSE151512_24h; DEG_GSE168797_Mock_CBDV; DEG_GSE179661_HepG2; DEG_GSE201508_cGAMP; DEG_GSE201508_enthanol
DHRS3	11	4	DEG_GSE168797_Mock_CBDV; DEG_GSE261716_CBD0.2_28d; DEG_GSE261716_CBD20_28d; DEG_GSE261716_CBD20_2d	7	DEG_GSE131565; DEG_GSE168797_SARS_CBDV; DEG_GSE179661_HepG2; DEG_GSE179661_MHCC97H; DEG_GSE235310_LPS; DEG_GSE235310_Veh; DEG_GSE274859_LPS_24h
DMPK	11	9	DEG_GSE151512_24h; DEG_GSE151512_6h; DEG_GSE168797_Mock_CBD; DEG_GSE168797_SARS_CBD; DEG_GSE235310_Veh; DEG_GSE266113_WT; DEG_GSE272113_CBD; DEG_GSE272113_sCBD; DEG_GSE274859_LPS_24h	2	DEG_GSE131565; DEG_GSE152088
DNAJC1	11	0	NA	11	DEG_GSE131565; DEG_GSE151512_24h; DEG_GSE168797_Mock_CBD; DEG_GSE168797_SARS_CBD; DEG_GSE179661_HepG2; DEG_GSE179661_MHCC97H; DEG_GSE201508_cGAMP; DEG_GSE235310_LPS; DEG_GSE235310_Veh; DEG_GSE272113_CBD; DEG_GSE274859_LPS_24h
DOP1B	11	4	DEG_GSE261716_CBD0.2_28d; DEG_GSE261716_CBD10_28d; DEG_GSE261716_CBD20_28d; DEG_GSE272113_CBD	7	DEG_GSE131565; DEG_GSE151512_24h; DEG_GSE168797_Mock_CBD; DEG_GSE168797_SARS_CBD; DEG_GSE168797_SARS_CBDV; DEG_GSE179661_MHCC97H; DEG_GSE274859_LPS_24h
DPAGT1	11	1	DEG_GSE179661_HepG2	10	DEG_GSE131565; DEG_GSE151512_12h; DEG_GSE151512_24h; DEG_GSE168797_Mock_CBD; DEG_GSE168797_SARS_CBD; DEG_GSE179661_MHCC97H; DEG_GSE235310_LPS; DEG_GSE272113_CBD; DEG_GSE272113_sCBD; DEG_GSE274859_LPS_24h
DTYMK	11	10	DEG_GSE131565; DEG_GSE151512_12h; DEG_GSE151512_24h; DEG_GSE168797_Mock_CBD; DEG_GSE168797_SARS_CBD; DEG_GSE179661_HepG2; DEG_GSE179661_MHCC97H; DEG_GSE201508_cGAMP; DEG_GSE274859_LPS_24h; GSE70689_CBD_NoLPS	1	DEG_GSE261716_CBD20_2d
DUSP10	11	2	DEG_GSE151512_6h; DEG_GSE168797_SARS_CBDV	9	DEG_GSE131565; DEG_GSE168797_Mock_CBD; DEG_GSE179661_HepG2; DEG_GSE179661_MHCC97H; DEG_GSE201508_cGAMP; DEG_GSE201508_enthanol; DEG_GSE235310_LPS; DEG_GSE235310_Veh; DEG_GSE274859_LPS_24h
DUSP4	11	4	DEG_GSE131565; DEG_GSE168797_SARS_CBD; DEG_GSE179661_MHCC97H; DEG_GSE235310_LPS	7	DEG_GSE151512_3h; DEG_GSE151512_6h; DEG_GSE179661_HepG2; DEG_GSE201508_cGAMP; DEG_GSE201508_enthanol; DEG_GSE272113_CBD; DEG_GSE274859_LPS_24h
DUSP6	11	5	DEG_GSE168797_SARS_CBDV; DEG_GSE179661_HepG2; DEG_GSE179661_MHCC97H; DEG_GSE261716_CBD0.2_28d; DEG_GSE274859_LPS_24h	6	DEG_GSE151512_12h; DEG_GSE151512_24h; DEG_GSE151512_3h; DEG_GSE151512_6h; DEG_GSE168797_Mock_CBD; DEG_GSE272113_sCBD
DYNLL1	11	9	DEG_GSE131565; DEG_GSE151512_12h; DEG_GSE151512_24h; DEG_GSE168797_Mock_CBD; DEG_GSE168797_SARS_CBD; DEG_GSE179661_HepG2; DEG_GSE201508_cGAMP; DEG_GSE235310_LPS; DEG_GSE272113_CBD	2	DEG_GSE261716_CBD0.2_2d; DEG_GSE261716_CBD20_2d
E2F1	11	8	DEG_GSE131565; DEG_GSE151512_24h; DEG_GSE168797_Mock_CBD; DEG_GSE168797_SARS_CBD; DEG_GSE179661_MHCC97H; DEG_GSE235310_LPS; DEG_GSE261716_CBD20_28d; DEG_GSE274859_LPS_24h	3	DEG_GSE179661_HepG2; DEG_GSE266113_WT; DEG_GSE272113_CBD
EDEM1	11	2	DEG_GSE235310_LPS; DEG_GSE261716_CBD20_28d	9	DEG_GSE131565; DEG_GSE151512_24h; DEG_GSE151512_6h; DEG_GSE168797_Mock_CBD; DEG_GSE168797_SARS_CBD; DEG_GSE179661_HepG2; DEG_GSE179661_MHCC97H; DEG_GSE201508_cGAMP; DEG_GSE201508_enthanol
EIF4A2	11	5	DEG_GSE131565; DEG_GSE232624_Veh_CBD3_6h; DEG_GSE235310_LPS; DEG_GSE272113_CBD; DEG_GSE272113_sCBD	6	DEG_GSE151512_12h; DEG_GSE151512_24h; DEG_GSE151512_6h; DEG_GSE168797_Mock_CBD; DEG_GSE179661_HepG2; DEG_GSE179661_MHCC97H
ENC1	11	11	DEG_GSE131565; DEG_GSE151512_12h; DEG_GSE151512_24h; DEG_GSE151512_6h; DEG_GSE168797_SARS_CBD; DEG_GSE179661_HepG2; DEG_GSE179661_MHCC97H; DEG_GSE235310_Veh; DEG_GSE272113_CBD; DEG_GSE272113_sCBD; DEG_GSE274859_LPS_24h	0	NA
ENDOG	11	7	DEG_GSE131565; DEG_GSE151512_12h; DEG_GSE151512_24h; DEG_GSE168797_Mock_CBD; DEG_GSE179661_MHCC97H; DEG_GSE201508_cGAMP; DEG_GSE274859_LPS_24h	4	DEG_GSE232624_EtOH0.75_CBD0.75_6h; DEG_GSE261716_CBD0.2_2d; DEG_GSE272113_CBD; DEG_GSE272113_sCBD
ENO1	11	7	DEG_GSE131565; DEG_GSE151512_12h; DEG_GSE151512_24h; DEG_GSE168797_Mock_CBD; DEG_GSE179661_MHCC97H; DEG_GSE235310_LPS; DEG_GSE274859_LPS_24h	4	DEG_GSE179661_HepG2; DEG_GSE261716_CBD0.2_2d; DEG_GSE272113_CBD; DEG_GSE272113_sCBD
EPHA2	11	7	DEG_GSE152088; DEG_GSE168797_Mock_CBD; DEG_GSE168797_SARS_CBD; DEG_GSE168797_SARS_CBDV; DEG_GSE179661_MHCC97H; DEG_GSE235310_Veh; DEG_GSE274859_LPS_24h	4	DEG_GSE151512_12h; DEG_GSE151512_24h; DEG_GSE179661_HepG2; DEG_GSE235310_LPS
EPOP	11	10	DEG_GSE131565; DEG_GSE151512_24h; DEG_GSE151512_6h; DEG_GSE168797_Mock_CBD; DEG_GSE168797_SARS_CBD; DEG_GSE201508_cGAMP; DEG_GSE201508_enthanol; DEG_GSE235310_Veh; DEG_GSE261716_CBD20_28d; DEG_GSE261716_CBD20_2d	1	DEG_GSE272113_CBD
ERN1	11	2	DEG_GSE168797_SARS_CBDV; DEG_GSE261716_CBD20_28d	9	DEG_GSE131565; DEG_GSE151512_24h; DEG_GSE168797_Mock_CBD; DEG_GSE179661_HepG2; DEG_GSE179661_MHCC97H; DEG_GSE235310_Veh; DEG_GSE272113_CBD; DEG_GSE272113_sCBD; DEG_GSE274859_LPS_24h
ESPL1	11	11	DEG_GSE131565; DEG_GSE151512_12h; DEG_GSE151512_24h; DEG_GSE168797_Mock_CBD; DEG_GSE168797_SARS_CBD; DEG_GSE179661_HepG2; DEG_GSE179661_MHCC97H; DEG_GSE232624_EtOH0.75_CBD0.75_6h; DEG_GSE235310_LPS; DEG_GSE235310_Veh; DEG_GSE274859_LPS_24h	0	NA
ETS2	11	4	DEG_GSE168797_Mock_CBD; DEG_GSE168797_SARS_CBD; DEG_GSE168797_SARS_CBDV; DEG_GSE261716_CBD0.2_28d	7	DEG_GSE131565; DEG_GSE151512_24h; DEG_GSE179661_HepG2; DEG_GSE179661_MHCC97H; DEG_GSE235310_LPS; DEG_GSE272113_CBD; DEG_GSE274859_LPS_24h
FADS1	11	3	DEG_GSE179661_MHCC97H; DEG_GSE261716_CBD0.2_28d; DEG_GSE261716_CBD20_28d	8	DEG_GSE151512_12h; DEG_GSE151512_24h; DEG_GSE168797_SARS_CBDV; DEG_GSE201508_cGAMP; DEG_GSE201508_enthanol; DEG_GSE235310_LPS; DEG_GSE272113_CBD; DEG_GSE272113_sCBD
FAM102B	11	10	DEG_GSE131565; DEG_GSE168797_Mock_CBD; DEG_GSE168797_SARS_CBD; DEG_GSE179661_MHCC97H; DEG_GSE201508_cGAMP; DEG_GSE235310_Veh; DEG_GSE261716_CBD0.2_2d; DEG_GSE272113_sCBD; DEG_GSE274435_DMSO_24h; DEG_GSE274859_LPS_24h	1	DEG_GSE261716_CBD20_28d
FAM8A1	11	3	DEG_GSE179661_HepG2; DEG_GSE272113_CBD; DEG_GSE272113_sCBD	8	DEG_GSE131565; DEG_GSE151512_12h; DEG_GSE151512_24h; DEG_GSE151512_6h; DEG_GSE168797_Mock_CBD; DEG_GSE168797_SARS_CBD; DEG_GSE235310_LPS; DEG_GSE274859_LPS_24h
FASN	11	8	DEG_GSE131565; DEG_GSE168797_Mock_CBD; DEG_GSE179661_MHCC97H; DEG_GSE235310_LPS; DEG_GSE235310_Veh; DEG_GSE274435_DMSO_24h; DEG_GSE274859_LPS_24h; DEG_GSE275998_CDB20	3	DEG_GSE151512_12h; DEG_GSE151512_24h; DEG_GSE168797_SARS_CBDV
FBXL20	11	1	DEG_GSE274859_LPS_24h	10	DEG_GSE131565; DEG_GSE151512_24h; DEG_GSE168797_Mock_CBD; DEG_GSE168797_SARS_CBD; DEG_GSE179661_HepG2; DEG_GSE179661_MHCC97H; DEG_GSE201508_cGAMP; DEG_GSE235310_Veh; DEG_GSE272113_CBD; GSE70689_CBD_wLPS
FBXO5	11	11	DEG_GSE131565; DEG_GSE151512_12h; DEG_GSE151512_24h; DEG_GSE152088; DEG_GSE168797_Mock_CBD; DEG_GSE168797_SARS_CBD; DEG_GSE179661_HepG2; DEG_GSE179661_MHCC97H; DEG_GSE201508_cGAMP; DEG_GSE235310_LPS; DEG_GSE274859_LPS_24h	0	NA
FILIP1L	11	10	DEG_GSE131565; DEG_GSE151512_12h; DEG_GSE201508_cGAMP; DEG_GSE201508_enthanol; DEG_GSE235310_LPS; DEG_GSE235310_Veh; DEG_GSE261716_CBD0.2_2d; DEG_GSE272113_CBD; DEG_GSE272113_sCBD; DEG_GSE274859_LPS_24h	1	DEG_GSE179661_MHCC97H
FKBP4	11	2	DEG_GSE261716_CBD20_28d; DEG_GSE274859_LPS_24h	9	DEG_GSE151512_6h; DEG_GSE168797_SARS_CBD; DEG_GSE179661_HepG2; DEG_GSE201508_cGAMP; DEG_GSE201508_enthanol; DEG_GSE235310_LPS; DEG_GSE261716_CBD0.2_2d; DEG_GSE272113_CBD; DEG_GSE272113_sCBD
FOS	11	6	DEG_GSE168797_SARS_CBD; DEG_GSE168797_SARS_CBDV; DEG_GSE179661_MHCC97H; DEG_GSE272113_CBD; DEG_GSE274859_LPS_24h; GSE70689_CBD_wLPS	5	DEG_GSE151512_12h; DEG_GSE151512_24h; DEG_GSE152088; DEG_GSE168797_Mock_CBD; DEG_GSE179661_HepG2
FRMD4A	11	9	DEG_GSE151512_24h; DEG_GSE179661_MHCC97H; DEG_GSE232624_EtOH0.25_CBD0.75_12h; DEG_GSE232624_EtOH0.75_CBD0.75_12h; DEG_GSE235310_Veh; DEG_GSE274435_DMSO_24h; DEG_GSE274859_LPS_24h; GSE70689_CBD_NoLPS; GSE70689_CBD_wLPS	2	DEG_GSE179661_HepG2; DEG_GSE235310_LPS
GADD45B	11	1	DEG_GSE235310_LPS	10	DEG_GSE131565; DEG_GSE151512_24h; DEG_GSE152088; DEG_GSE168797_Mock_CBD; DEG_GSE168797_SARS_CBD; DEG_GSE179661_HepG2; DEG_GSE179661_MHCC97H; DEG_GSE261716_CBD20_28d; DEG_GSE261716_CBD20_2d; DEG_GSE274859_LPS_24h
GADD45G	11	6	DEG_GSE151512_24h; DEG_GSE151512_6h; DEG_GSE235310_Veh; DEG_GSE261716_CBD20_28d; DEG_GSE272113_CBD; DEG_GSE272113_sCBD	5	DEG_GSE131565; DEG_GSE168797_SARS_CBD; DEG_GSE179661_HepG2; DEG_GSE235310_LPS; DEG_GSE261716_CBD0.2_28d
GANAB	11	10	DEG_GSE131565; DEG_GSE151512_12h; DEG_GSE151512_24h; DEG_GSE168797_Mock_CBD; DEG_GSE179661_HepG2; DEG_GSE179661_MHCC97H; DEG_GSE201508_cGAMP; DEG_GSE201508_enthanol; DEG_GSE261716_CBD20_28d; DEG_GSE272113_sCBD	1	DEG_GSE168797_SARS_CBDV
GAS1	11	8	DEG_GSE131565; DEG_GSE151512_12h; DEG_GSE151512_24h; DEG_GSE151512_6h; DEG_GSE201508_cGAMP; DEG_GSE235310_Veh; DEG_GSE272113_CBD; DEG_GSE272113_sCBD	3	DEG_GSE152088; DEG_GSE168797_Mock_CBD; DEG_GSE168797_SARS_CBD
GFPT1	11	0	NA	11	DEG_GSE131565; DEG_GSE151512_24h; DEG_GSE168797_Mock_CBD; DEG_GSE168797_SARS_CBD; DEG_GSE179661_HepG2; DEG_GSE179661_MHCC97H; DEG_GSE201508_cGAMP; DEG_GSE201508_enthanol; DEG_GSE235310_Veh; DEG_GSE272113_CBD; DEG_GSE274859_LPS_24h
GGH	11	7	DEG_GSE131565; DEG_GSE151512_12h; DEG_GSE168797_Mock_CBD; DEG_GSE168797_SARS_CBD; DEG_GSE179661_HepG2; DEG_GSE179661_MHCC97H; DEG_GSE235310_LPS	4	DEG_GSE168797_SARS_CBDV; DEG_GSE261716_CBD20_28d; DEG_GSE261716_CBD20_2d; DEG_GSE274859_LPS_24h
GID4	11	3	DEG_GSE179661_HepG2; DEG_GSE261716_CBD20_28d; DEG_GSE261716_CBD20_2d	8	DEG_GSE131565; DEG_GSE168797_Mock_CBD; DEG_GSE168797_SARS_CBD; DEG_GSE179661_MHCC97H; DEG_GSE201508_enthanol; DEG_GSE235310_LPS; DEG_GSE272113_CBD; DEG_GSE272113_sCBD
GIGYF1	11	4	DEG_GSE151512_24h; DEG_GSE151512_6h; DEG_GSE261716_CBD20_28d; DEG_GSE261716_CBD20_2d	7	DEG_GSE152088; DEG_GSE179661_HepG2; DEG_GSE179661_MHCC97H; DEG_GSE201508_cGAMP; DEG_GSE235310_LPS; DEG_GSE272113_CBD; DEG_GSE272113_sCBD
GINS2	11	8	DEG_GSE131565; DEG_GSE151512_12h; DEG_GSE151512_24h; DEG_GSE168797_Mock_CBD; DEG_GSE168797_SARS_CBD; DEG_GSE179661_HepG2; DEG_GSE179661_MHCC97H; DEG_GSE201508_cGAMP	3	DEG_GSE235310_Veh; DEG_GSE261716_CBD20_28d; DEG_GSE266113_WT
GNE	11	4	DEG_GSE232624_EtOH0.75_CBD0.75_6h; DEG_GSE232624_Veh_CBD0.75_12h; DEG_GSE235310_LPS; DEG_GSE274859_LPS_24h	7	DEG_GSE131565; DEG_GSE151512_12h; DEG_GSE151512_24h; DEG_GSE168797_Mock_CBDV; DEG_GSE179661_MHCC97H; DEG_GSE201508_cGAMP; DEG_GSE232624_EtOH0.25_CBD0.75_12h
GOT1	11	0	NA	11	DEG_GSE131565; DEG_GSE151512_24h; DEG_GSE168797_Mock_CBD; DEG_GSE168797_SARS_CBD; DEG_GSE179661_HepG2; DEG_GSE179661_MHCC97H; DEG_GSE235310_LPS; DEG_GSE235310_Veh; DEG_GSE272113_CBD; DEG_GSE272113_sCBD; DEG_GSE274859_LPS_24h
GSTO1	11	1	DEG_GSE179661_MHCC97H	10	DEG_GSE131565; DEG_GSE168797_Mock_CBD; DEG_GSE168797_SARS_CBD; DEG_GSE201508_cGAMP; DEG_GSE201508_enthanol; DEG_GSE235310_LPS; DEG_GSE235310_Veh; DEG_GSE272113_CBD; DEG_GSE272113_sCBD; DEG_GSE274859_LPS_24h
H1-0	11	2	DEG_GSE168797_Mock_CBD; DEG_GSE168797_SARS_CBD	9	DEG_GSE131565; DEG_GSE151512_12h; DEG_GSE151512_24h; DEG_GSE151512_3h; DEG_GSE151512_6h; DEG_GSE152088; DEG_GSE179661_HepG2; DEG_GSE179661_MHCC97H; DEG_GSE235310_Veh
H6PD	11	7	DEG_GSE131565; DEG_GSE168797_Mock_CBD; DEG_GSE179661_HepG2; DEG_GSE179661_MHCC97H; DEG_GSE201508_cGAMP; DEG_GSE261716_CBD10_28d; DEG_GSE261716_CBD20_28d	4	DEG_GSE151512_24h; DEG_GSE235310_Veh; DEG_GSE272113_CBD; DEG_GSE272113_sCBD
HES6	11	6	DEG_GSE168797_Mock_CBD; DEG_GSE201508_cGAMP; DEG_GSE261716_CBD0.2_28d; DEG_GSE261716_CBD20_28d; DEG_GSE272113_CBD; DEG_GSE272113_sCBD	5	DEG_GSE131565; DEG_GSE151512_12h; DEG_GSE151512_24h; DEG_GSE179661_HepG2; DEG_GSE235310_Veh
HILPDA	11	7	DEG_GSE151512_12h; DEG_GSE151512_24h; DEG_GSE151512_6h; DEG_GSE168797_Mock_CBD; DEG_GSE168797_SARS_CBD; DEG_GSE179661_MHCC97H; DEG_GSE235310_LPS	4	DEG_GSE131565; DEG_GSE272113_CBD; DEG_GSE272113_sCBD; DEG_GSE274859_LPS_24h
HSBP1	11	7	DEG_GSE131565; DEG_GSE151512_12h; DEG_GSE151512_24h; DEG_GSE179661_HepG2; DEG_GSE179661_MHCC97H; DEG_GSE272113_CBD; DEG_GSE272113_sCBD	4	DEG_GSE168797_SARS_CBD; DEG_GSE235310_LPS; DEG_GSE261716_CBD20_28d; DEG_GSE261716_CBD20_2d
HSPB1	11	4	DEG_GSE235310_LPS; DEG_GSE235310_Veh; DEG_GSE272113_CBD; DEG_GSE272113_sCBD	7	DEG_GSE131565; DEG_GSE151512_12h; DEG_GSE152088; DEG_GSE168797_SARS_CBD; DEG_GSE179661_HepG2; DEG_GSE179661_MHCC97H; DEG_GSE201508_cGAMP
HSPH1	11	2	DEG_GSE152088; DEG_GSE235310_Veh	9	DEG_GSE168797_Mock_CBD; DEG_GSE168797_SARS_CBD; DEG_GSE168797_SARS_CBDV; DEG_GSE179661_HepG2; DEG_GSE179661_MHCC97H; DEG_GSE201508_cGAMP; DEG_GSE235310_LPS; DEG_GSE272113_CBD; DEG_GSE272113_sCBD
IARS1	11	1	DEG_GSE152088	10	DEG_GSE131565; DEG_GSE151512_12h; DEG_GSE151512_24h; DEG_GSE151512_6h; DEG_GSE168797_Mock_CBD; DEG_GSE168797_SARS_CBD; DEG_GSE179661_MHCC97H; DEG_GSE201508_cGAMP; DEG_GSE235310_LPS; DEG_GSE235310_Veh
IDH1	11	5	DEG_GSE151512_3h; DEG_GSE179661_HepG2; DEG_GSE272113_CBD; DEG_GSE272113_sCBD; DEG_GSE274859_LPS_24h	6	DEG_GSE131565; DEG_GSE168797_Mock_CBD; DEG_GSE168797_SARS_CBD; DEG_GSE168797_SARS_CBDV; DEG_GSE201508_cGAMP; DEG_GSE201508_enthanol
IFI30	11	5	DEG_GSE131565; DEG_GSE179661_HepG2; DEG_GSE179661_MHCC97H; DEG_GSE235310_LPS; DEG_GSE274859_LPS_24h	6	DEG_GSE151512_24h; DEG_GSE152088; DEG_GSE168797_SARS_CBD; DEG_GSE201508_cGAMP; DEG_GSE201508_enthanol; DEG_GSE235310_Veh
IFRD1	11	0	NA	11	DEG_GSE131565; DEG_GSE151512_12h; DEG_GSE151512_24h; DEG_GSE168797_Mock_CBD; DEG_GSE168797_SARS_CBD; DEG_GSE179661_HepG2; DEG_GSE179661_MHCC97H; DEG_GSE235310_Veh; DEG_GSE266113_mutNdufs4; DEG_GSE272113_sCBD; DEG_GSE274859_LPS_24h
IGFBP5	11	9	DEG_GSE131565; DEG_GSE151512_12h; DEG_GSE151512_24h; DEG_GSE168797_Mock_CBD; DEG_GSE168797_SARS_CBD; DEG_GSE168797_SARS_CBDV; DEG_GSE261716_CBD0.2_2d; DEG_GSE272113_CBD; DEG_GSE272113_sCBD	2	DEG_GSE168797_Mock_CBDV; DEG_GSE232624_Veh_CBD3_6h
IL17RA	11	4	DEG_GSE151512_6h; DEG_GSE261716_CBD20_28d; DEG_GSE261716_CBD20_2d; DEG_GSE274859_LPS_24h	7	DEG_GSE131565; DEG_GSE168797_SARS_CBD; DEG_GSE179661_HepG2; DEG_GSE232624_EtOH0.25_CBD0.75_12h; DEG_GSE235310_LPS; DEG_GSE235310_Veh; DEG_GSE272113_CBD
INTS5	11	8	DEG_GSE131565; DEG_GSE151512_24h; DEG_GSE151512_6h; DEG_GSE168797_Mock_CBD; DEG_GSE168797_SARS_CBD; DEG_GSE179661_MHCC97H; DEG_GSE201508_cGAMP; DEG_GSE235310_LPS	3	DEG_GSE179661_HepG2; DEG_GSE272113_CBD; DEG_GSE272113_sCBD
IRF9	11	6	DEG_GSE131565; DEG_GSE151512_3h; DEG_GSE151512_6h; DEG_GSE168797_SARS_CBDV; DEG_GSE201508_cGAMP; DEG_GSE232624_Veh_CBD3_12h	5	DEG_GSE168797_Mock_CBD; DEG_GSE168797_SARS_CBD; DEG_GSE179661_HepG2; DEG_GSE235310_Veh; DEG_GSE274859_LPS_24h
ISG20	11	4	DEG_GSE151512_24h; DEG_GSE168797_SARS_CBDV; DEG_GSE201508_cGAMP; DEG_GSE235310_LPS	7	DEG_GSE131565; DEG_GSE168797_Mock_CBD; DEG_GSE168797_SARS_CBD; DEG_GSE179661_HepG2; DEG_GSE179661_MHCC97H; DEG_GSE235310_Veh; DEG_GSE261716_CBD20_28d
ITGA2	11	2	DEG_GSE168797_Mock_CBDV; DEG_GSE179661_MHCC97H	9	DEG_GSE131565; DEG_GSE151512_24h; DEG_GSE168797_Mock_CBD; DEG_GSE168797_SARS_CBD; DEG_GSE179661_HepG2; DEG_GSE232624_EtOH0.75_CBD0.75_6h; DEG_GSE235310_LPS; DEG_GSE261716_CBD0.2_28d; DEG_GSE266113_WT
ITGB1	11	8	DEG_GSE131565; DEG_GSE152088; DEG_GSE168797_Mock_CBD; DEG_GSE168797_SARS_CBD; DEG_GSE179661_MHCC97H; DEG_GSE232624_EtOH0.25_CBD0.75_12h; DEG_GSE272113_CBD; DEG_GSE272113_sCBD	3	DEG_GSE232624_Veh_CBD3_6h; DEG_GSE235310_LPS; DEG_GSE274435_DMSO_24h
ITPRIP	11	2	DEG_GSE261716_CBD0.2_2d; DEG_GSE274859_LPS_24h	9	DEG_GSE131565; DEG_GSE168797_Mock_CBD; DEG_GSE168797_SARS_CBD; DEG_GSE179661_HepG2; DEG_GSE179661_MHCC97H; DEG_GSE235310_LPS; DEG_GSE235310_Veh; DEG_GSE272113_CBD; DEG_GSE272113_sCBD
JDP2	11	3	DEG_GSE168797_Mock_CBD; DEG_GSE272113_CBD; DEG_GSE272113_sCBD	8	DEG_GSE131565; DEG_GSE151512_12h; DEG_GSE151512_24h; DEG_GSE151512_3h; DEG_GSE151512_6h; DEG_GSE179661_HepG2; DEG_GSE179661_MHCC97H; DEG_GSE235310_Veh
JPT2	11	9	DEG_GSE131565; DEG_GSE151512_12h; DEG_GSE151512_24h; DEG_GSE168797_Mock_CBD; DEG_GSE179661_MHCC97H; DEG_GSE201508_cGAMP; DEG_GSE201508_enthanol; DEG_GSE235310_LPS; DEG_GSE274859_LPS_24h	2	DEG_GSE272113_CBD; DEG_GSE272113_sCBD
JUP	11	6	DEG_GSE151512_12h; DEG_GSE151512_24h; DEG_GSE168797_Mock_CBD; DEG_GSE235310_Veh; DEG_GSE272113_CBD; DEG_GSE272113_sCBD	5	DEG_GSE131565; DEG_GSE152088; DEG_GSE168797_Mock_CBDV; DEG_GSE179661_HepG2; DEG_GSE179661_MHCC97H
KANK2	11	10	DEG_GSE131565; DEG_GSE168797_Mock_CBD; DEG_GSE168797_SARS_CBD; DEG_GSE179661_HepG2; DEG_GSE179661_MHCC97H; DEG_GSE201508_cGAMP; DEG_GSE261716_CBD0.2_28d; DEG_GSE272113_CBD; DEG_GSE272113_sCBD; DEG_GSE274859_LPS_24h	1	DEG_GSE152088
KIAA1217	11	7	DEG_GSE151512_12h; DEG_GSE151512_24h; DEG_GSE261716_CBD10_28d; DEG_GSE272113_CBD; DEG_GSE272113_sCBD; DEG_GSE274435_DMSO_24h; DEG_GSE274435_EtOH_24h	4	DEG_GSE131565; DEG_GSE168797_Mock_CBD; DEG_GSE168797_SARS_CBD; DEG_GSE179661_MHCC97H
LAPTM4A	11	2	DEG_GSE272113_CBD; DEG_GSE272113_sCBD	9	DEG_GSE131565; DEG_GSE168797_Mock_CBD; DEG_GSE168797_SARS_CBD; DEG_GSE168797_SARS_CBDV; DEG_GSE179661_MHCC97H; DEG_GSE201508_cGAMP; DEG_GSE201508_enthanol; DEG_GSE235310_LPS; DEG_GSE274859_LPS_24h
LHFPL2	11	1	DEG_GSE235310_LPS	10	DEG_GSE131565; DEG_GSE151512_24h; DEG_GSE168797_Mock_CBD; DEG_GSE168797_SARS_CBD; DEG_GSE179661_HepG2; DEG_GSE179661_MHCC97H; DEG_GSE272113_CBD; DEG_GSE274435_DMSO_24h; DEG_GSE274435_EtOH_24h; DEG_GSE274859_LPS_24h
LIPA	11	5	DEG_GSE131565; DEG_GSE179661_HepG2; DEG_GSE179661_MHCC97H; DEG_GSE201508_cGAMP; DEG_GSE272113_CBD	6	DEG_GSE151512_12h; DEG_GSE151512_24h; DEG_GSE168797_SARS_CBD; DEG_GSE168797_SARS_CBDV; DEG_GSE235310_LPS; DEG_GSE274859_LPS_24h
LONP1	11	1	DEG_GSE261716_CBD20_28d	10	DEG_GSE131565; DEG_GSE168797_Mock_CBD; DEG_GSE168797_SARS_CBD; DEG_GSE179661_HepG2; DEG_GSE179661_MHCC97H; DEG_GSE235310_LPS; DEG_GSE235310_Veh; DEG_GSE272113_CBD; DEG_GSE272113_sCBD; DEG_GSE274859_LPS_24h
LOXL2	11	9	DEG_GSE131565; DEG_GSE151512_12h; DEG_GSE151512_24h; DEG_GSE151512_6h; DEG_GSE168797_Mock_CBD; DEG_GSE168797_Mock_CBDV; DEG_GSE168797_SARS_CBD; DEG_GSE179661_MHCC97H; DEG_GSE272113_sCBD	2	DEG_GSE168797_SARS_CBDV; DEG_GSE179661_HepG2
LPCAT1	11	9	DEG_GSE151512_24h; DEG_GSE168797_Mock_CBD; DEG_GSE179661_MHCC97H; DEG_GSE235310_LPS; DEG_GSE235310_Veh; DEG_GSE272113_CBD; DEG_GSE274435_DMSO_24h; DEG_GSE274435_EtOH_24h; DEG_GSE274859_LPS_24h	2	DEG_GSE131565; DEG_GSE179661_HepG2
LPCAT3	11	4	DEG_GSE168797_Mock_CBD; DEG_GSE168797_Mock_CBDV; DEG_GSE179661_MHCC97H; DEG_GSE274859_LPS_24h	7	DEG_GSE151512_12h; DEG_GSE151512_24h; DEG_GSE168797_SARS_CBD; DEG_GSE168797_SARS_CBDV; DEG_GSE201508_cGAMP; DEG_GSE235310_LPS; DEG_GSE235310_Veh
LRP1	11	6	DEG_GSE151512_24h; DEG_GSE179661_HepG2; DEG_GSE179661_MHCC97H; DEG_GSE232624_EtOH0.25_CBD0.75_12h; DEG_GSE261716_CBD10_28d; DEG_GSE261716_CBD20_28d	5	DEG_GSE152088; DEG_GSE168797_SARS_CBDV; DEG_GSE201508_cGAMP; DEG_GSE235310_LPS; DEG_GSE235310_Veh
LRRC59	11	2	DEG_GSE151512_12h; DEG_GSE151512_24h	9	DEG_GSE131565; DEG_GSE168797_Mock_CBD; DEG_GSE168797_SARS_CBD; DEG_GSE179661_HepG2; DEG_GSE179661_MHCC97H; DEG_GSE235310_LPS; DEG_GSE272113_CBD; DEG_GSE272113_sCBD; DEG_GSE274859_LPS_24h
LRRC8D	11	5	DEG_GSE168797_Mock_CBD; DEG_GSE179661_HepG2; DEG_GSE179661_MHCC97H; DEG_GSE201508_cGAMP; DEG_GSE235310_LPS	6	DEG_GSE151512_24h; DEG_GSE151512_6h; DEG_GSE235310_Veh; DEG_GSE272113_CBD; DEG_GSE272113_sCBD; DEG_GSE274859_LPS_24h
LSS	11	5	DEG_GSE131565; DEG_GSE168797_Mock_CBD; DEG_GSE179661_HepG2; DEG_GSE179661_MHCC97H; DEG_GSE274859_LPS_24h	6	DEG_GSE151512_12h; DEG_GSE151512_24h; DEG_GSE201508_cGAMP; DEG_GSE201508_enthanol; DEG_GSE235310_LPS; DEG_GSE272113_CBD
M6PR	11	3	DEG_GSE131565; DEG_GSE168797_Mock_CBDV; DEG_GSE179661_MHCC97H	8	DEG_GSE168797_Mock_CBD; DEG_GSE168797_SARS_CBD; DEG_GSE168797_SARS_CBDV; DEG_GSE201508_cGAMP; DEG_GSE201508_enthanol; DEG_GSE235310_LPS; DEG_GSE272113_CBD; DEG_GSE272113_sCBD
MAP3K1	11	5	DEG_GSE168797_Mock_CBD; DEG_GSE168797_SARS_CBD; DEG_GSE168797_SARS_CBDV; DEG_GSE235310_LPS; DEG_GSE274859_LPS_24h	6	DEG_GSE151512_12h; DEG_GSE151512_24h; DEG_GSE151512_6h; DEG_GSE168797_Mock_CBDV; DEG_GSE201508_cGAMP; DEG_GSE272113_CBD
MCM5	11	10	DEG_GSE131565; DEG_GSE151512_24h; DEG_GSE168797_Mock_CBD; DEG_GSE168797_SARS_CBD; DEG_GSE179661_HepG2; DEG_GSE179661_MHCC97H; DEG_GSE201508_cGAMP; DEG_GSE235310_LPS; DEG_GSE235310_Veh; DEG_GSE274859_LPS_24h	1	DEG_GSE272113_CBD
MDM2	11	4	DEG_GSE152088; DEG_GSE179661_HepG2; DEG_GSE272113_CBD; DEG_GSE272113_sCBD	7	DEG_GSE168797_Mock_CBD; DEG_GSE168797_SARS_CBD; DEG_GSE179661_MHCC97H; DEG_GSE235310_LPS; DEG_GSE235310_Veh; DEG_GSE261716_CBD20_28d; DEG_GSE274859_LPS_24h
MELK	11	9	DEG_GSE131565; DEG_GSE151512_12h; DEG_GSE151512_24h; DEG_GSE168797_Mock_CBD; DEG_GSE168797_SARS_CBD; DEG_GSE179661_HepG2; DEG_GSE201508_cGAMP; DEG_GSE235310_LPS; DEG_GSE274859_LPS_24h	2	DEG_GSE179661_MHCC97H; DEG_GSE266113_WT
MEX3A	11	11	DEG_GSE131565; DEG_GSE151512_24h; DEG_GSE151512_6h; DEG_GSE168797_Mock_CBD; DEG_GSE168797_Mock_CBDV; DEG_GSE168797_SARS_CBD; DEG_GSE179661_MHCC97H; DEG_GSE235310_Veh; DEG_GSE272113_CBD; DEG_GSE272113_sCBD; DEG_GSE274859_LPS_24h	0	NA
MFHAS1	11	5	DEG_GSE201508_cGAMP; DEG_GSE261716_CBD0.2_28d; DEG_GSE261716_CBD10_28d; DEG_GSE261716_CBD20_28d; DEG_GSE261716_CBD20_2d	6	DEG_GSE131565; DEG_GSE151512_24h; DEG_GSE179661_HepG2; DEG_GSE179661_MHCC97H; DEG_GSE235310_LPS; DEG_GSE235310_Veh
MID1IP1	11	1	DEG_GSE261716_CBD0.2_28d	10	DEG_GSE131565; DEG_GSE168797_Mock_CBD; DEG_GSE168797_SARS_CBD; DEG_GSE179661_HepG2; DEG_GSE201508_cGAMP; DEG_GSE201508_enthanol; DEG_GSE235310_LPS; DEG_GSE235310_Veh; DEG_GSE272113_CBD; DEG_GSE272113_sCBD
MINPP1	11	10	DEG_GSE131565; DEG_GSE151512_24h; DEG_GSE151512_6h; DEG_GSE179661_HepG2; DEG_GSE179661_MHCC97H; DEG_GSE201508_cGAMP; DEG_GSE201508_enthanol; DEG_GSE272113_CBD; DEG_GSE272113_sCBD; DEG_GSE274859_LPS_24h	1	DEG_GSE261716_CBD0.2_28d
MKNK2	11	3	DEG_GSE151512_6h; DEG_GSE235310_LPS; DEG_GSE274435_DMSO_24h	8	DEG_GSE131565; DEG_GSE152088; DEG_GSE168797_Mock_CBD; DEG_GSE168797_SARS_CBD; DEG_GSE179661_HepG2; DEG_GSE179661_MHCC97H; DEG_GSE261716_CBD0.2_28d; DEG_GSE274859_LPS_24h
MSH6	11	10	DEG_GSE151512_12h; DEG_GSE151512_24h; DEG_GSE168797_Mock_CBD; DEG_GSE168797_SARS_CBD; DEG_GSE179661_HepG2; DEG_GSE179661_MHCC97H; DEG_GSE201508_cGAMP; DEG_GSE235310_LPS; DEG_GSE235310_Veh; DEG_GSE274859_LPS_24h	1	DEG_GSE266113_WT
MTMR3	11	3	DEG_GSE168797_SARS_CBDV; DEG_GSE261716_CBD20_28d; DEG_GSE266113_WT	8	DEG_GSE131565; DEG_GSE151512_24h; DEG_GSE168797_Mock_CBD; DEG_GSE179661_HepG2; DEG_GSE179661_MHCC97H; DEG_GSE235310_LPS; DEG_GSE235310_Veh; DEG_GSE274859_LPS_24h
MTSS1	11	6	DEG_GSE151512_12h; DEG_GSE151512_24h; DEG_GSE179661_HepG2; DEG_GSE235310_LPS; DEG_GSE235310_Veh; DEG_GSE270378_CBD0.75_24h	5	DEG_GSE201508_cGAMP; DEG_GSE201508_enthanol; DEG_GSE261716_CBD10_28d; DEG_GSE261716_CBD10_2d; DEG_GSE261716_CBD20_28d
MYBBP1A	11	5	DEG_GSE131565; DEG_GSE179661_HepG2; DEG_GSE179661_MHCC97H; DEG_GSE201508_enthanol; DEG_GSE274859_LPS_24h	6	DEG_GSE151512_12h; DEG_GSE151512_24h; DEG_GSE168797_Mock_CBD; DEG_GSE235310_LPS; DEG_GSE272113_CBD; DEG_GSE272113_sCBD
MYCL	11	3	DEG_GSE235310_Veh; DEG_GSE272113_CBD; DEG_GSE272113_sCBD	8	DEG_GSE131565; DEG_GSE151512_12h; DEG_GSE151512_24h; DEG_GSE152088; DEG_GSE168797_Mock_CBD; DEG_GSE168797_SARS_CBD; DEG_GSE179661_MHCC97H; DEG_GSE261716_CBD0.2_28d
NAV2	11	6	DEG_GSE131565; DEG_GSE168797_Mock_CBDV; DEG_GSE261716_CBD0.2_28d; DEG_GSE261716_CBD10_28d; DEG_GSE272113_sCBD; DEG_GSE275998_CDB20	5	DEG_GSE151512_12h; DEG_GSE151512_24h; DEG_GSE168797_Mock_CBD; DEG_GSE179661_MHCC97H; DEG_GSE274859_LPS_24h
NCKAP1	11	3	DEG_GSE152088; DEG_GSE179661_MHCC97H; DEG_GSE235310_LPS	8	DEG_GSE131565; DEG_GSE151512_12h; DEG_GSE151512_24h; DEG_GSE168797_SARS_CBD; DEG_GSE168797_SARS_CBDV; DEG_GSE232624_Veh_CBD3_12h; DEG_GSE235310_Veh; DEG_GSE272113_CBD
NFIX	11	8	DEG_GSE131565; DEG_GSE151512_12h; DEG_GSE151512_6h; DEG_GSE168797_Mock_CBD; DEG_GSE201508_cGAMP; DEG_GSE261716_CBD0.2_28d; DEG_GSE261716_CBD20_28d; DEG_GSE274859_LPS_24h	3	DEG_GSE152088; DEG_GSE235310_LPS; DEG_GSE235310_Veh
NHSL1	11	5	DEG_GSE179661_HepG2; DEG_GSE261716_CBD0.2_2d; DEG_GSE272113_CBD; DEG_GSE272113_sCBD; DEG_GSE274859_LPS_24h	6	DEG_GSE131565; DEG_GSE168797_Mock_CBD; DEG_GSE179661_MHCC97H; DEG_GSE232624_EtOH0.75_CBD0.75_12h; DEG_GSE235310_LPS; DEG_GSE235310_Veh
NREP	11	10	DEG_GSE131565; DEG_GSE151512_12h; DEG_GSE151512_24h; DEG_GSE151512_6h; DEG_GSE168797_Mock_CBD; DEG_GSE168797_SARS_CBD; DEG_GSE179661_HepG2; DEG_GSE235310_LPS; DEG_GSE272113_CBD; DEG_GSE272113_sCBD	1	DEG_GSE168797_Mock_CBDV
NSMAF	11	3	DEG_GSE151512_12h; DEG_GSE151512_24h; DEG_GSE274859_LPS_24h	8	DEG_GSE131565; DEG_GSE168797_Mock_CBD; DEG_GSE168797_SARS_CBD; DEG_GSE179661_MHCC97H; DEG_GSE201508_cGAMP; DEG_GSE201508_enthanol; DEG_GSE235310_LPS; DEG_GSE235310_Veh
NUAK1	11	9	DEG_GSE131565; DEG_GSE168797_Mock_CBD; DEG_GSE168797_SARS_CBD; DEG_GSE168797_SARS_CBDV; DEG_GSE232624_Veh_CBD3_6h; DEG_GSE261716_CBD20_28d; DEG_GSE261716_CBD20_2d; DEG_GSE272113_CBD; DEG_GSE272113_sCBD	2	DEG_GSE179661_HepG2; DEG_GSE232624_EtOH0.25_CBD0.75_12h
OGA	11	6	DEG_GSE151512_12h; DEG_GSE151512_6h; DEG_GSE152088; DEG_GSE168797_SARS_CBDV; DEG_GSE235310_LPS; DEG_GSE261716_CBD10_28d	5	DEG_GSE131565; DEG_GSE168797_Mock_CBD; DEG_GSE179661_HepG2; DEG_GSE179661_MHCC97H; DEG_GSE201508_cGAMP
OS9	11	5	DEG_GSE151512_12h; DEG_GSE151512_24h; DEG_GSE151512_6h; DEG_GSE201508_enthanol; DEG_GSE261716_CBD20_28d	6	DEG_GSE131565; DEG_GSE168797_Mock_CBD; DEG_GSE168797_SARS_CBD; DEG_GSE179661_MHCC97H; DEG_GSE235310_LPS; DEG_GSE274859_LPS_24h
OSBPL1A	11	0	NA	11	DEG_GSE151512_24h; DEG_GSE151512_6h; DEG_GSE168797_Mock_CBD; DEG_GSE168797_SARS_CBD; DEG_GSE168797_SARS_CBDV; DEG_GSE179661_MHCC97H; DEG_GSE201508_cGAMP; DEG_GSE235310_LPS; DEG_GSE235310_Veh; DEG_GSE261716_CBD0.2_28d; DEG_GSE261716_CBD20_28d
OSGIN2	11	2	DEG_GSE152088; DEG_GSE179661_MHCC97H	9	DEG_GSE131565; DEG_GSE151512_12h; DEG_GSE151512_24h; DEG_GSE168797_Mock_CBD; DEG_GSE168797_SARS_CBD; DEG_GSE201508_cGAMP; DEG_GSE235310_LPS; DEG_GSE235310_Veh; DEG_GSE274859_LPS_24h
P4HB	11	4	DEG_GSE151512_12h; DEG_GSE151512_24h; DEG_GSE151512_6h; DEG_GSE201508_cGAMP	7	DEG_GSE131565; DEG_GSE168797_Mock_CBD; DEG_GSE168797_SARS_CBD; DEG_GSE179661_MHCC97H; DEG_GSE235310_LPS; DEG_GSE272113_CBD; DEG_GSE272113_sCBD
PAICS	11	9	DEG_GSE131565; DEG_GSE151512_12h; DEG_GSE151512_24h; DEG_GSE152088; DEG_GSE168797_Mock_CBD; DEG_GSE168797_SARS_CBD; DEG_GSE179661_HepG2; DEG_GSE179661_MHCC97H; DEG_GSE274859_LPS_24h	2	DEG_GSE266113_WT; DEG_GSE274435_DMSO_24h
PAK1	11	7	DEG_GSE235310_LPS; DEG_GSE235310_Veh; DEG_GSE272113_CBD; DEG_GSE272113_sCBD; DEG_GSE274859_LPS_24h; GSE70689_CBD_NoLPS; GSE70689_CBD_wLPS	4	DEG_GSE168797_Mock_CBD; DEG_GSE179661_HepG2; DEG_GSE179661_MHCC97H; DEG_GSE261716_CBD20_28d
PARP1	11	10	DEG_GSE131565; DEG_GSE151512_24h; DEG_GSE168797_Mock_CBD; DEG_GSE168797_SARS_CBD; DEG_GSE179661_HepG2; DEG_GSE179661_MHCC97H; DEG_GSE201508_cGAMP; DEG_GSE235310_LPS; DEG_GSE235310_Veh; DEG_GSE274859_LPS_24h	1	DEG_GSE272113_CBD
PAXX	11	10	DEG_GSE131565; DEG_GSE168797_Mock_CBD; DEG_GSE168797_SARS_CBD; DEG_GSE179661_MHCC97H; DEG_GSE201508_cGAMP; DEG_GSE235310_LPS; DEG_GSE235310_Veh; DEG_GSE261716_CBD0.2_28d; DEG_GSE272113_CBD; DEG_GSE272113_sCBD	1	DEG_GSE179661_HepG2
PCNA	11	9	DEG_GSE131565; DEG_GSE151512_12h; DEG_GSE151512_24h; DEG_GSE168797_Mock_CBD; DEG_GSE168797_SARS_CBD; DEG_GSE179661_HepG2; DEG_GSE179661_MHCC97H; DEG_GSE235310_LPS; DEG_GSE274859_LPS_24h	2	DEG_GSE266113_WT; DEG_GSE272113_sCBD
PEAR1	11	6	DEG_GSE151512_12h; DEG_GSE151512_24h; DEG_GSE151512_6h; DEG_GSE168797_Mock_CBDV; DEG_GSE168797_SARS_CBD; DEG_GSE274859_LPS_24h	5	DEG_GSE131565; DEG_GSE179661_HepG2; DEG_GSE179661_MHCC97H; DEG_GSE201508_cGAMP; DEG_GSE201508_enthanol
PFKL	11	8	DEG_GSE151512_24h; DEG_GSE168797_Mock_CBD; DEG_GSE235310_LPS; DEG_GSE261716_CBD0.2_28d; DEG_GSE261716_CBD20_28d; DEG_GSE261716_CBD20_2d; DEG_GSE274435_DMSO_24h; DEG_GSE274859_LPS_24h	3	DEG_GSE152088; DEG_GSE272113_CBD; DEG_GSE272113_sCBD
PGD	11	1	DEG_GSE179661_MHCC97H	10	DEG_GSE131565; DEG_GSE168797_SARS_CBD; DEG_GSE168797_SARS_CBDV; DEG_GSE201508_cGAMP; DEG_GSE201508_enthanol; DEG_GSE235310_LPS; DEG_GSE235310_Veh; DEG_GSE272113_CBD; DEG_GSE272113_sCBD; GSE70689_CBD_wLPS
PHLDB3	11	5	DEG_GSE235310_LPS; DEG_GSE235310_Veh; DEG_GSE261716_CBD0.2_28d; DEG_GSE261716_CBD20_28d; DEG_GSE261716_CBD20_2d	6	DEG_GSE131565; DEG_GSE151512_24h; DEG_GSE168797_Mock_CBD; DEG_GSE168797_SARS_CBD; DEG_GSE179661_HepG2; DEG_GSE179661_MHCC97H
PIM3	11	2	DEG_GSE261716_CBD0.2_2d; DEG_GSE274859_LPS_24h	9	DEG_GSE131565; DEG_GSE151512_24h; DEG_GSE152088; DEG_GSE168797_Mock_CBD; DEG_GSE179661_HepG2; DEG_GSE179661_MHCC97H; DEG_GSE232624_Veh_CBD3_12h; DEG_GSE235310_Veh; DEG_GSE261716_CBD0.2_28d
PIR	11	0	NA	11	DEG_GSE131565; DEG_GSE151512_24h; DEG_GSE168797_SARS_CBD; DEG_GSE168797_SARS_CBDV; DEG_GSE179661_MHCC97H; DEG_GSE201508_cGAMP; DEG_GSE201508_enthanol; DEG_GSE235310_Veh; DEG_GSE272113_sCBD; DEG_GSE274435_DMSO_24h; DEG_GSE274859_LPS_24h
PLAU	11	5	DEG_GSE168797_Mock_CBDV; DEG_GSE168797_SARS_CBD; DEG_GSE179661_MHCC97H; DEG_GSE272113_CBD; DEG_GSE272113_sCBD	6	DEG_GSE131565; DEG_GSE168797_SARS_CBDV; DEG_GSE179661_HepG2; DEG_GSE232624_Veh_CBD3_12h; DEG_GSE235310_LPS; DEG_GSE266113_WT
PLEKHM1	11	2	DEG_GSE261716_CBD10_28d; DEG_GSE261716_CBD20_28d	9	DEG_GSE131565; DEG_GSE168797_Mock_CBD; DEG_GSE168797_SARS_CBD; DEG_GSE179661_HepG2; DEG_GSE179661_MHCC97H; DEG_GSE235310_LPS; DEG_GSE272113_CBD; DEG_GSE272113_sCBD; DEG_GSE274859_LPS_24h
PLEKHO1	11	5	DEG_GSE131565; DEG_GSE151512_12h; DEG_GSE151512_24h; DEG_GSE151512_6h; DEG_GSE201508_cGAMP	6	DEG_GSE168797_Mock_CBD; DEG_GSE168797_SARS_CBD; DEG_GSE179661_HepG2; DEG_GSE179661_MHCC97H; DEG_GSE235310_LPS; DEG_GSE274859_LPS_24h
POLR2L	11	10	DEG_GSE131565; DEG_GSE151512_24h; DEG_GSE168797_Mock_CBD; DEG_GSE168797_SARS_CBD; DEG_GSE179661_HepG2; DEG_GSE179661_MHCC97H; DEG_GSE201508_cGAMP; DEG_GSE235310_Veh; DEG_GSE272113_CBD; DEG_GSE274859_LPS_24h	1	DEG_GSE261716_CBD0.2_2d
PPM1B	11	8	DEG_GSE151512_24h; DEG_GSE168797_Mock_CBD; DEG_GSE235310_LPS; DEG_GSE261716_CBD0.2_28d; DEG_GSE261716_CBD10_28d; DEG_GSE261716_CBD20_28d; DEG_GSE261716_CBD20_2d; DEG_GSE272113_sCBD	3	DEG_GSE131565; DEG_GSE168797_SARS_CBD; DEG_GSE179661_MHCC97H
PPM1G	11	11	DEG_GSE131565; DEG_GSE151512_12h; DEG_GSE151512_24h; DEG_GSE151512_6h; DEG_GSE168797_Mock_CBD; DEG_GSE168797_SARS_CBD; DEG_GSE179661_MHCC97H; DEG_GSE201508_cGAMP; DEG_GSE201508_enthanol; DEG_GSE274859_LPS_24h; GSE70689_CBD_NoLPS	0	NA
PRDX1	11	4	DEG_GSE131565; DEG_GSE151512_24h; DEG_GSE168797_Mock_CBD; DEG_GSE179661_MHCC97H	7	DEG_GSE151512_6h; DEG_GSE168797_SARS_CBDV; DEG_GSE201508_cGAMP; DEG_GSE201508_enthanol; DEG_GSE235310_LPS; DEG_GSE272113_sCBD; DEG_GSE274859_LPS_24h
RALY	11	9	DEG_GSE131565; DEG_GSE151512_12h; DEG_GSE151512_24h; DEG_GSE168797_Mock_CBD; DEG_GSE201508_cGAMP; DEG_GSE235310_LPS; DEG_GSE272113_CBD; DEG_GSE272113_sCBD; DEG_GSE274859_LPS_24h	2	DEG_GSE179661_HepG2; DEG_GSE179661_MHCC97H
RBBP7	11	9	DEG_GSE131565; DEG_GSE168797_Mock_CBD; DEG_GSE179661_HepG2; DEG_GSE179661_MHCC97H; DEG_GSE232624_EtOH0.25_CBD0.75_12h; DEG_GSE232624_EtOH0.75_CBD0.75_12h; DEG_GSE232624_Veh_CBD0.75_6h; DEG_GSE235310_Veh; DEG_GSE274859_LPS_24h	2	DEG_GSE232624_EtOH0.75_CBD0.75_6h; DEG_GSE232624_Veh_CBD0.75_12h
RBM3	11	5	DEG_GSE131565; DEG_GSE151512_24h; DEG_GSE179661_MHCC97H; DEG_GSE232624_EtOH0.75_CBD0.75_6h; DEG_GSE235310_LPS	6	DEG_GSE232624_EtOH0.25_CBD0.75_12h; DEG_GSE232624_EtOH0.75_CBD0.75_12h; DEG_GSE261716_CBD0.2_28d; DEG_GSE261716_CBD10_28d; DEG_GSE261716_CBD20_28d; DEG_GSE261716_CBD20_2d
RBMX	11	10	DEG_GSE131565; DEG_GSE151512_12h; DEG_GSE151512_24h; DEG_GSE151512_6h; DEG_GSE168797_Mock_CBD; DEG_GSE179661_HepG2; DEG_GSE179661_MHCC97H; DEG_GSE201508_cGAMP; DEG_GSE201508_enthanol; DEG_GSE235310_LPS	1	DEG_GSE274859_LPS_24h
RCOR2	11	9	DEG_GSE131565; DEG_GSE151512_12h; DEG_GSE151512_24h; DEG_GSE151512_6h; DEG_GSE168797_Mock_CBD; DEG_GSE168797_SARS_CBD; DEG_GSE179661_MHCC97H; DEG_GSE235310_Veh; DEG_GSE274859_LPS_24h	2	DEG_GSE272113_CBD; DEG_GSE272113_sCBD
RECQL4	11	6	DEG_GSE131565; DEG_GSE151512_24h; DEG_GSE168797_Mock_CBD; DEG_GSE168797_SARS_CBD; DEG_GSE179661_MHCC97H; DEG_GSE235310_Veh	5	DEG_GSE179661_HepG2; DEG_GSE272113_CBD; DEG_GSE274859_LPS_24h; GSE70689_CBD_NoLPS; GSE70689_CBD_wLPS
RHOQ	11	0	NA	11	DEG_GSE131565; DEG_GSE151512_12h; DEG_GSE151512_24h; DEG_GSE168797_Mock_CBD; DEG_GSE168797_SARS_CBD; DEG_GSE179661_MHCC97H; DEG_GSE201508_cGAMP; DEG_GSE235310_LPS; DEG_GSE235310_Veh; DEG_GSE272113_CBD; DEG_GSE272113_sCBD
RND1	11	4	DEG_GSE232624_EtOH0.75_CBD0.75_6h; DEG_GSE232624_Veh_CBD0.75_12h; DEG_GSE232624_Veh_CBD3_12h; DEG_GSE235310_LPS	7	DEG_GSE131565; DEG_GSE179661_HepG2; DEG_GSE179661_MHCC97H; DEG_GSE232624_EtOH0.25_CBD0.75_12h; DEG_GSE272113_CBD; DEG_GSE272113_sCBD; DEG_GSE274859_LPS_24h
RNF144A	11	8	DEG_GSE131565; DEG_GSE151512_12h; DEG_GSE168797_Mock_CBD; DEG_GSE168797_SARS_CBD; DEG_GSE179661_HepG2; DEG_GSE201508_enthanol; DEG_GSE261716_CBD10_28d; DEG_GSE261716_CBD20_2d	3	DEG_GSE179661_MHCC97H; DEG_GSE235310_LPS; DEG_GSE235310_Veh
RNF185	11	1	DEG_GSE151512_24h	10	DEG_GSE131565; DEG_GSE168797_Mock_CBD; DEG_GSE168797_SARS_CBD; DEG_GSE179661_HepG2; DEG_GSE179661_MHCC97H; DEG_GSE201508_cGAMP; DEG_GSE201508_enthanol; DEG_GSE235310_Veh; DEG_GSE272113_sCBD; DEG_GSE274859_LPS_24h
RPS6KA4	11	7	DEG_GSE131565; DEG_GSE168797_Mock_CBD; DEG_GSE168797_SARS_CBD; DEG_GSE179661_MHCC97H; DEG_GSE201508_cGAMP; DEG_GSE201508_enthanol; DEG_GSE235310_LPS	4	DEG_GSE152088; DEG_GSE179661_HepG2; DEG_GSE272113_CBD; DEG_GSE272113_sCBD
RUSC2	11	1	DEG_GSE151512_24h	10	DEG_GSE131565; DEG_GSE168797_Mock_CBD; DEG_GSE179661_HepG2; DEG_GSE179661_MHCC97H; DEG_GSE201508_cGAMP; DEG_GSE235310_LPS; DEG_GSE272113_CBD; DEG_GSE272113_sCBD; DEG_GSE274859_LPS_24h; GSE70689_CBD_NoLPS
SEC61B	11	2	DEG_GSE151512_24h; DEG_GSE235310_LPS	9	DEG_GSE131565; DEG_GSE168797_Mock_CBD; DEG_GSE168797_SARS_CBD; DEG_GSE179661_HepG2; DEG_GSE179661_MHCC97H; DEG_GSE261716_CBD20_2d; DEG_GSE272113_CBD; DEG_GSE272113_sCBD; DEG_GSE274859_LPS_24h
SELENON	11	10	DEG_GSE131565; DEG_GSE151512_12h; DEG_GSE151512_24h; DEG_GSE151512_6h; DEG_GSE168797_Mock_CBD; DEG_GSE168797_SARS_CBD; DEG_GSE179661_MHCC97H; DEG_GSE201508_cGAMP; DEG_GSE201508_enthanol; DEG_GSE266113_WT	1	DEG_GSE235310_LPS
SGSH	11	3	DEG_GSE168797_Mock_CBD; DEG_GSE168797_SARS_CBD; DEG_GSE179661_MHCC97H	8	DEG_GSE131565; DEG_GSE151512_12h; DEG_GSE151512_24h; DEG_GSE201508_cGAMP; DEG_GSE232624_Veh_CBD3_12h; DEG_GSE235310_LPS; DEG_GSE235310_Veh; DEG_GSE272113_CBD
SLC1A5	11	0	NA	11	DEG_GSE131565; DEG_GSE151512_12h; DEG_GSE151512_24h; DEG_GSE151512_6h; DEG_GSE168797_Mock_CBD; DEG_GSE168797_SARS_CBD; DEG_GSE179661_HepG2; DEG_GSE235310_LPS; DEG_GSE235310_Veh; DEG_GSE272113_CBD; DEG_GSE272113_sCBD
SLC25A20	11	4	DEG_GSE179661_HepG2; DEG_GSE201508_cGAMP; DEG_GSE235310_LPS; DEG_GSE272113_CBD	7	DEG_GSE131565; DEG_GSE168797_Mock_CBD; DEG_GSE168797_SARS_CBD; DEG_GSE261716_CBD0.2_28d; DEG_GSE261716_CBD10_28d; DEG_GSE261716_CBD20_28d; DEG_GSE274859_LPS_24h
SLC2A1	11	6	DEG_GSE151512_12h; DEG_GSE151512_24h; DEG_GSE151512_6h; DEG_GSE201508_cGAMP; DEG_GSE235310_LPS; DEG_GSE261716_CBD20_28d	5	DEG_GSE152088; DEG_GSE179661_HepG2; DEG_GSE179661_MHCC97H; DEG_GSE272113_CBD; DEG_GSE272113_sCBD
SLC31A1	11	0	NA	11	DEG_GSE131565; DEG_GSE168797_Mock_CBD; DEG_GSE168797_SARS_CBD; DEG_GSE179661_MHCC97H; DEG_GSE201508_cGAMP; DEG_GSE232624_EtOH0.25_CBD0.75_12h; DEG_GSE235310_LPS; DEG_GSE235310_Veh; DEG_GSE272113_CBD; DEG_GSE272113_sCBD; DEG_GSE274859_LPS_24h
SLC36A1	11	3	DEG_GSE151512_24h; DEG_GSE179661_MHCC97H; DEG_GSE274435_DMSO_24h	8	DEG_GSE131565; DEG_GSE168797_Mock_CBD; DEG_GSE168797_SARS_CBD; DEG_GSE201508_cGAMP; DEG_GSE201508_enthanol; DEG_GSE272113_CBD; DEG_GSE272113_sCBD; DEG_GSE274859_LPS_24h
SLC39A7	11	4	DEG_GSE168797_SARS_CBDV; DEG_GSE179661_HepG2; DEG_GSE261716_CBD0.2_28d; DEG_GSE261716_CBD20_28d	7	DEG_GSE131565; DEG_GSE168797_Mock_CBD; DEG_GSE179661_MHCC97H; DEG_GSE201508_enthanol; DEG_GSE272113_CBD; DEG_GSE272113_sCBD; DEG_GSE274859_LPS_24h
SLC43A2	11	10	DEG_GSE168797_SARS_CBDV; DEG_GSE179661_MHCC97H; DEG_GSE201508_enthanol; DEG_GSE232624_Veh_CBD0.75_12h; DEG_GSE232624_Veh_CBD3_12h; DEG_GSE235310_Veh; DEG_GSE261716_CBD10_28d; DEG_GSE261716_CBD20_28d; DEG_GSE272113_sCBD; DEG_GSE274859_LPS_24h	1	DEG_GSE274435_DMSO_4h
SLC48A1	11	1	DEG_GSE179661_MHCC97H	10	DEG_GSE151512_12h; DEG_GSE151512_24h; DEG_GSE201508_cGAMP; DEG_GSE201508_enthanol; DEG_GSE235310_Veh; DEG_GSE261716_CBD10_28d; DEG_GSE261716_CBD20_28d; DEG_GSE272113_CBD; DEG_GSE272113_sCBD; DEG_GSE274859_LPS_24h
SNX10	11	2	DEG_GSE179661_HepG2; DEG_GSE201508_cGAMP	9	DEG_GSE131565; DEG_GSE168797_Mock_CBD; DEG_GSE168797_SARS_CBD; DEG_GSE179661_MHCC97H; DEG_GSE235310_LPS; DEG_GSE261716_CBD20_28d; DEG_GSE272113_CBD; DEG_GSE272113_sCBD; DEG_GSE274859_LPS_24h
SOAT1	11	2	DEG_GSE179661_HepG2; DEG_GSE179661_MHCC97H	9	DEG_GSE151512_24h; DEG_GSE168797_Mock_CBD; DEG_GSE168797_SARS_CBD; DEG_GSE168797_SARS_CBDV; DEG_GSE201508_cGAMP; DEG_GSE235310_LPS; DEG_GSE272113_CBD; DEG_GSE272113_sCBD; DEG_GSE274859_LPS_24h
SORD	11	9	DEG_GSE131565; DEG_GSE151512_12h; DEG_GSE168797_Mock_CBD; DEG_GSE168797_SARS_CBD; DEG_GSE168797_SARS_CBDV; DEG_GSE179661_HepG2; DEG_GSE179661_MHCC97H; DEG_GSE261716_CBD0.2_28d; DEG_GSE261716_CBD20_28d	2	DEG_GSE235310_LPS; DEG_GSE274435_DMSO_24h
SOX4	11	9	DEG_GSE131565; DEG_GSE151512_12h; DEG_GSE151512_24h; DEG_GSE151512_3h; DEG_GSE151512_6h; DEG_GSE168797_Mock_CBD; DEG_GSE168797_SARS_CBD; DEG_GSE272113_CBD; DEG_GSE272113_sCBD	2	DEG_GSE152088; DEG_GSE179661_HepG2
SPP1	11	3	DEG_GSE179661_HepG2; DEG_GSE179661_MHCC97H; DEG_GSE261716_CBD0.2_2d	8	DEG_GSE131565; DEG_GSE168797_Mock_CBD; DEG_GSE168797_SARS_CBD; DEG_GSE235310_LPS; DEG_GSE235310_Veh; DEG_GSE272113_CBD; DEG_GSE272113_sCBD; DEG_GSE274859_LPS_24h
SREBF2	11	4	DEG_GSE151512_6h; DEG_GSE235310_LPS; DEG_GSE235310_Veh; DEG_GSE274859_LPS_24h	7	DEG_GSE131565; DEG_GSE151512_12h; DEG_GSE151512_24h; DEG_GSE179661_HepG2; DEG_GSE201508_cGAMP; DEG_GSE201508_enthanol; DEG_GSE272113_CBD
SRSF2	11	8	DEG_GSE131565; DEG_GSE151512_24h; DEG_GSE168797_Mock_CBD; DEG_GSE179661_HepG2; DEG_GSE179661_MHCC97H; DEG_GSE201508_cGAMP; DEG_GSE235310_LPS; DEG_GSE235310_Veh	3	DEG_GSE261716_CBD0.2_2d; DEG_GSE261716_CBD20_2d; DEG_GSE272113_sCBD
ST3GAL1	11	4	DEG_GSE179661_HepG2; DEG_GSE179661_MHCC97H; DEG_GSE235310_LPS; DEG_GSE272113_sCBD	7	DEG_GSE131565; DEG_GSE151512_24h; DEG_GSE168797_Mock_CBD; DEG_GSE168797_SARS_CBD; DEG_GSE201508_cGAMP; DEG_GSE201508_enthanol; DEG_GSE235310_Veh
STARD13	11	6	DEG_GSE131565; DEG_GSE168797_SARS_CBDV; DEG_GSE261716_CBD0.2_28d; DEG_GSE261716_CBD0.2_2d; DEG_GSE272113_CBD; DEG_GSE272113_sCBD	5	DEG_GSE179661_HepG2; DEG_GSE179661_MHCC97H; DEG_GSE201508_cGAMP; DEG_GSE201508_enthanol; DEG_GSE235310_LPS
STRIP2	11	3	DEG_GSE168797_Mock_CBDV; DEG_GSE272113_CBD; DEG_GSE272113_sCBD	8	DEG_GSE131565; DEG_GSE151512_24h; DEG_GSE168797_Mock_CBD; DEG_GSE168797_SARS_CBD; DEG_GSE168797_SARS_CBDV; DEG_GSE201508_cGAMP; DEG_GSE201508_enthanol; DEG_GSE235310_Veh
SYNE1	11	5	DEG_GSE168797_Mock_CBDV; DEG_GSE168797_SARS_CBD; DEG_GSE168797_SARS_CBDV; DEG_GSE261716_CBD10_28d; DEG_GSE261716_CBD20_28d	6	DEG_GSE131565; DEG_GSE168797_Mock_CBD; DEG_GSE179661_HepG2; DEG_GSE179661_MHCC97H; DEG_GSE201508_cGAMP; DEG_GSE274859_LPS_24h
SYT11	11	8	DEG_GSE131565; DEG_GSE151512_12h; DEG_GSE151512_24h; DEG_GSE151512_6h; DEG_GSE261716_CBD20_28d; DEG_GSE270378_CBD0.325_24h; DEG_GSE270378_CBD0.75_24h; DEG_GSE272113_CBD	3	DEG_GSE168797_Mock_CBD; DEG_GSE168797_SARS_CBD; DEG_GSE179661_HepG2
SYVN1	11	1	DEG_GSE151512_24h	10	DEG_GSE131565; DEG_GSE168797_Mock_CBD; DEG_GSE168797_SARS_CBD; DEG_GSE179661_HepG2; DEG_GSE179661_MHCC97H; DEG_GSE201508_cGAMP; DEG_GSE235310_LPS; DEG_GSE272113_CBD; DEG_GSE272113_sCBD; DEG_GSE274859_LPS_24h
TAGLN2	11	6	DEG_GSE131565; DEG_GSE151512_12h; DEG_GSE151512_24h; DEG_GSE168797_Mock_CBD; DEG_GSE168797_SARS_CBD; DEG_GSE235310_LPS	5	DEG_GSE179661_HepG2; DEG_GSE179661_MHCC97H; DEG_GSE232624_EtOH0.75_CBD0.75_6h; DEG_GSE272113_CBD; DEG_GSE272113_sCBD
TBC1D14	11	9	DEG_GSE151512_12h; DEG_GSE151512_24h; DEG_GSE151512_6h; DEG_GSE168797_Mock_CBD; DEG_GSE168797_SARS_CBD; DEG_GSE179661_HepG2; DEG_GSE179661_MHCC97H; DEG_GSE235310_Veh; DEG_GSE274859_LPS_24h	2	DEG_GSE131565; DEG_GSE201508_cGAMP
TBRG1	11	0	NA	11	DEG_GSE131565; DEG_GSE168797_Mock_CBD; DEG_GSE168797_SARS_CBD; DEG_GSE179661_HepG2; DEG_GSE179661_MHCC97H; DEG_GSE201508_cGAMP; DEG_GSE235310_LPS; DEG_GSE235310_Veh; DEG_GSE261716_CBD0.2_28d; DEG_GSE272113_sCBD; DEG_GSE274859_LPS_24h
TDRKH	11	5	DEG_GSE179661_HepG2; DEG_GSE235310_LPS; DEG_GSE235310_Veh; DEG_GSE272113_CBD; DEG_GSE272113_sCBD	6	DEG_GSE131565; DEG_GSE151512_12h; DEG_GSE151512_24h; DEG_GSE168797_Mock_CBD; DEG_GSE168797_SARS_CBD; DEG_GSE179661_MHCC97H
TGFB1	11	4	DEG_GSE179661_MHCC97H; DEG_GSE201508_cGAMP; DEG_GSE274859_LPS_24h; GSE70689_CBD_wLPS	7	DEG_GSE131565; DEG_GSE179661_HepG2; DEG_GSE235310_LPS; DEG_GSE235310_Veh; DEG_GSE261716_CBD20_28d; DEG_GSE272113_CBD; DEG_GSE272113_sCBD
TIMM21	11	8	DEG_GSE131565; DEG_GSE151512_24h; DEG_GSE152088; DEG_GSE168797_Mock_CBD; DEG_GSE168797_SARS_CBD; DEG_GSE179661_HepG2; DEG_GSE179661_MHCC97H; DEG_GSE235310_Veh	3	DEG_GSE261716_CBD0.2_28d; DEG_GSE261716_CBD20_28d; DEG_GSE266113_WT
TLE1	11	4	DEG_GSE151512_6h; DEG_GSE201508_cGAMP; DEG_GSE274859_LPS_24h; GSE70689_CBD_NoLPS	7	DEG_GSE131565; DEG_GSE168797_Mock_CBD; DEG_GSE168797_SARS_CBD; DEG_GSE179661_HepG2; DEG_GSE179661_MHCC97H; DEG_GSE235310_LPS; DEG_GSE235310_Veh
TMCC3	11	5	DEG_GSE151512_6h; DEG_GSE235310_LPS; DEG_GSE261716_CBD0.2_2d; DEG_GSE261716_CBD20_2d; DEG_GSE272113_sCBD	6	DEG_GSE131565; DEG_GSE168797_Mock_CBD; DEG_GSE168797_SARS_CBD; DEG_GSE179661_HepG2; DEG_GSE179661_MHCC97H; DEG_GSE235310_Veh
TMEM201	11	7	DEG_GSE131565; DEG_GSE151512_24h; DEG_GSE168797_Mock_CBD; DEG_GSE168797_Mock_CBDV; DEG_GSE168797_SARS_CBD; DEG_GSE179661_MHCC97H; DEG_GSE274859_LPS_24h	4	DEG_GSE179661_HepG2; DEG_GSE235310_LPS; DEG_GSE266113_WT; DEG_GSE272113_CBD
TMEM214	11	1	DEG_GSE151512_6h	10	DEG_GSE131565; DEG_GSE168797_Mock_CBD; DEG_GSE168797_SARS_CBD; DEG_GSE168797_SARS_CBDV; DEG_GSE179661_HepG2; DEG_GSE179661_MHCC97H; DEG_GSE201508_cGAMP; DEG_GSE272113_CBD; DEG_GSE272113_sCBD; DEG_GSE274859_LPS_24h
TNFAIP2	11	5	DEG_GSE168797_Mock_CBDV; DEG_GSE168797_SARS_CBD; DEG_GSE179661_MHCC97H; DEG_GSE235310_LPS; DEG_GSE261716_CBD0.2_28d	6	DEG_GSE131565; DEG_GSE235310_Veh; DEG_GSE272113_CBD; DEG_GSE272113_sCBD; DEG_GSE274859_LPS_24h; GSE70689_CBD_NoLPS
TNFAIP3	11	4	DEG_GSE168797_SARS_CBD; DEG_GSE168797_SARS_CBDV; DEG_GSE272113_CBD; DEG_GSE272113_sCBD	7	DEG_GSE131565; DEG_GSE168797_Mock_CBD; DEG_GSE179661_HepG2; DEG_GSE179661_MHCC97H; DEG_GSE201508_cGAMP; DEG_GSE261716_CBD20_28d; DEG_GSE261716_CBD20_2d
TNS3	11	7	DEG_GSE131565; DEG_GSE151512_24h; DEG_GSE168797_Mock_CBD; DEG_GSE168797_SARS_CBD; DEG_GSE179661_HepG2; DEG_GSE179661_MHCC97H; DEG_GSE261716_CBD0.2_2d	4	DEG_GSE235310_LPS; DEG_GSE235310_Veh; DEG_GSE272113_CBD; DEG_GSE274859_LPS_24h
TOP1	11	9	DEG_GSE151512_12h; DEG_GSE151512_24h; DEG_GSE168797_Mock_CBD; DEG_GSE168797_SARS_CBD; DEG_GSE201508_cGAMP; DEG_GSE235310_Veh; DEG_GSE272113_CBD; DEG_GSE272113_sCBD; DEG_GSE274859_LPS_24h	2	DEG_GSE131565; DEG_GSE266113_WT
TP53INP2	11	5	DEG_GSE151512_12h; DEG_GSE151512_24h; DEG_GSE151512_6h; DEG_GSE272113_CBD; DEG_GSE272113_sCBD	6	DEG_GSE131565; DEG_GSE152088; DEG_GSE168797_Mock_CBDV; DEG_GSE179661_HepG2; DEG_GSE179661_MHCC97H; DEG_GSE274859_LPS_24h
TRIB1	11	6	DEG_GSE151512_12h; DEG_GSE151512_24h; DEG_GSE151512_6h; DEG_GSE235310_LPS; DEG_GSE235310_Veh; DEG_GSE274859_LPS_24h	5	DEG_GSE131565; DEG_GSE168797_Mock_CBD; DEG_GSE179661_HepG2; DEG_GSE272113_CBD; DEG_GSE272113_sCBD
TRIM28	11	10	DEG_GSE131565; DEG_GSE151512_12h; DEG_GSE151512_24h; DEG_GSE152088; DEG_GSE168797_Mock_CBD; DEG_GSE168797_SARS_CBD; DEG_GSE235310_LPS; DEG_GSE235310_Veh; DEG_GSE261716_CBD20_28d; DEG_GSE274859_LPS_24h	1	DEG_GSE179661_MHCC97H
TSC22D2	11	5	DEG_GSE151512_6h; DEG_GSE152088; DEG_GSE168797_Mock_CBDV; DEG_GSE168797_SARS_CBDV; DEG_GSE272113_sCBD	6	DEG_GSE131565; DEG_GSE168797_Mock_CBD; DEG_GSE179661_HepG2; DEG_GSE179661_MHCC97H; DEG_GSE235310_Veh; DEG_GSE274859_LPS_24h
TSC22D3	11	4	DEG_GSE201508_enthanol; DEG_GSE261716_CBD20_28d; DEG_GSE266113_WT; DEG_GSE272113_sCBD	7	DEG_GSE151512_12h; DEG_GSE151512_24h; DEG_GSE152088; DEG_GSE168797_SARS_CBD; DEG_GSE179661_HepG2; DEG_GSE179661_MHCC97H; DEG_GSE274859_LPS_24h
TYMS	11	8	DEG_GSE131565; DEG_GSE151512_24h; DEG_GSE168797_Mock_CBD; DEG_GSE168797_SARS_CBD; DEG_GSE179661_HepG2; DEG_GSE179661_MHCC97H; DEG_GSE201508_cGAMP; DEG_GSE274859_LPS_24h	3	DEG_GSE235310_Veh; DEG_GSE272113_CBD; DEG_GSE272113_sCBD
UBC	11	1	DEG_GSE151512_12h	10	DEG_GSE131565; DEG_GSE151512_3h; DEG_GSE151512_6h; DEG_GSE168797_Mock_CBD; DEG_GSE168797_SARS_CBD; DEG_GSE179661_HepG2; DEG_GSE179661_MHCC97H; DEG_GSE201508_cGAMP; DEG_GSE272113_sCBD; DEG_GSE274859_LPS_24h
UBTF	11	11	DEG_GSE131565; DEG_GSE151512_12h; DEG_GSE151512_24h; DEG_GSE151512_6h; DEG_GSE168797_Mock_CBD; DEG_GSE168797_SARS_CBD; DEG_GSE179661_HepG2; DEG_GSE179661_MHCC97H; DEG_GSE201508_cGAMP; DEG_GSE235310_LPS; DEG_GSE274859_LPS_24h	0	NA
UHRF1	11	9	DEG_GSE131565; DEG_GSE151512_12h; DEG_GSE151512_24h; DEG_GSE168797_Mock_CBD; DEG_GSE168797_SARS_CBD; DEG_GSE179661_HepG2; DEG_GSE179661_MHCC97H; DEG_GSE201508_cGAMP; DEG_GSE274859_LPS_24h	2	DEG_GSE272113_CBD; DEG_GSE274435_DMSO_24h
ULBP1	11	2	DEG_GSE235310_LPS; DEG_GSE274859_LPS_24h	9	DEG_GSE131565; DEG_GSE151512_12h; DEG_GSE151512_24h; DEG_GSE151512_3h; DEG_GSE151512_6h; DEG_GSE168797_Mock_CBD; DEG_GSE168797_SARS_CBD; DEG_GSE201508_cGAMP; DEG_GSE235310_Veh
VCL	11	10	DEG_GSE131565; DEG_GSE152088; DEG_GSE168797_Mock_CBD; DEG_GSE168797_SARS_CBD; DEG_GSE179661_MHCC97H; DEG_GSE235310_Veh; DEG_GSE272113_CBD; DEG_GSE272113_sCBD; DEG_GSE274859_LPS_24h; GSE70689_CBD_NoLPS	1	DEG_GSE151512_24h
WDR81	11	4	DEG_GSE151512_6h; DEG_GSE261716_CBD0.2_28d; DEG_GSE261716_CBD10_28d; DEG_GSE261716_CBD20_28d	7	DEG_GSE168797_Mock_CBD; DEG_GSE168797_SARS_CBD; DEG_GSE168797_SARS_CBDV; DEG_GSE179661_HepG2; DEG_GSE272113_CBD; DEG_GSE272113_sCBD; DEG_GSE274859_LPS_24h
XRCC5	11	9	DEG_GSE131565; DEG_GSE151512_24h; DEG_GSE152088; DEG_GSE168797_Mock_CBD; DEG_GSE179661_HepG2; DEG_GSE179661_MHCC97H; DEG_GSE235310_LPS; DEG_GSE272113_CBD; DEG_GSE272113_sCBD	2	DEG_GSE261716_CBD20_28d; DEG_GSE274859_LPS_24h
XXYLT1	11	11	DEG_GSE131565; DEG_GSE151512_24h; DEG_GSE168797_Mock_CBD; DEG_GSE168797_SARS_CBD; DEG_GSE179661_HepG2; DEG_GSE179661_MHCC97H; DEG_GSE201508_cGAMP; DEG_GSE201508_enthanol; DEG_GSE235310_LPS; DEG_GSE235310_Veh; DEG_GSE274859_LPS_24h	0	NA
YIPF2	11	1	DEG_GSE261716_CBD20_28d	10	DEG_GSE131565; DEG_GSE151512_12h; DEG_GSE151512_24h; DEG_GSE168797_Mock_CBD; DEG_GSE168797_SARS_CBD; DEG_GSE179661_HepG2; DEG_GSE179661_MHCC97H; DEG_GSE235310_LPS; DEG_GSE235310_Veh; DEG_GSE274859_LPS_24h
ZBTB38	11	9	DEG_GSE131565; DEG_GSE151512_24h; DEG_GSE152088; DEG_GSE168797_Mock_CBD; DEG_GSE168797_SARS_CBD; DEG_GSE168797_SARS_CBDV; DEG_GSE179661_MHCC97H; DEG_GSE235310_LPS; DEG_GSE235310_Veh	2	DEG_GSE272113_CBD; DEG_GSE274859_LPS_24h
ZC3H12C	11	5	DEG_GSE151512_12h; DEG_GSE151512_24h; DEG_GSE151512_6h; DEG_GSE168797_SARS_CBD; DEG_GSE168797_SARS_CBDV	6	DEG_GSE131565; DEG_GSE168797_Mock_CBD; DEG_GSE179661_MHCC97H; DEG_GSE201508_cGAMP; DEG_GSE235310_LPS; DEG_GSE235310_Veh
ZCCHC7	11	1	DEG_GSE235310_Veh	10	DEG_GSE131565; DEG_GSE151512_24h; DEG_GSE151512_6h; DEG_GSE168797_Mock_CBD; DEG_GSE168797_SARS_CBD; DEG_GSE179661_HepG2; DEG_GSE179661_MHCC97H; DEG_GSE201508_cGAMP; DEG_GSE235310_LPS; DEG_GSE274859_LPS_24h
ZEB2	11	3	DEG_GSE131565; DEG_GSE151512_24h; DEG_GSE261716_CBD0.2_2d	8	DEG_GSE168797_Mock_CBD; DEG_GSE179661_HepG2; DEG_GSE179661_MHCC97H; DEG_GSE201508_cGAMP; DEG_GSE235310_LPS; DEG_GSE272113_CBD; DEG_GSE272113_sCBD; DEG_GSE274859_LPS_24h
ZFAND2A	11	0	NA	11	DEG_GSE131565; DEG_GSE168797_Mock_CBD; DEG_GSE168797_SARS_CBD; DEG_GSE179661_HepG2; DEG_GSE179661_MHCC97H; DEG_GSE235310_Veh; DEG_GSE261716_CBD0.2_28d; DEG_GSE261716_CBD20_28d; DEG_GSE272113_CBD; DEG_GSE272113_sCBD; DEG_GSE274859_LPS_24h
ZNF318	11	8	DEG_GSE131565; DEG_GSE168797_Mock_CBD; DEG_GSE168797_SARS_CBD; DEG_GSE179661_HepG2; DEG_GSE232624_Veh_CBD0.75_12h; DEG_GSE232624_Veh_CBD3_12h; DEG_GSE261716_CBD10_28d; DEG_GSE274859_LPS_24h	3	DEG_GSE151512_24h; DEG_GSE201508_cGAMP; DEG_GSE235310_LPS
ZNF652	11	8	DEG_GSE151512_3h; DEG_GSE179661_HepG2; DEG_GSE235310_LPS; DEG_GSE235310_Veh; DEG_GSE261716_CBD0.2_2d; DEG_GSE261716_CBD10_28d; DEG_GSE261716_CBD20_2d; DEG_GSE274859_LPS_24h	3	DEG_GSE131565; DEG_GSE151512_24h; DEG_GSE232624_EtOH0.25_CBD0.75_12h
ZWINT	11	9	DEG_GSE131565; DEG_GSE151512_12h; DEG_GSE151512_24h; DEG_GSE151512_6h; DEG_GSE168797_Mock_CBD; DEG_GSE168797_SARS_CBD; DEG_GSE179661_HepG2; DEG_GSE179661_MHCC97H; DEG_GSE235310_Veh	2	DEG_GSE261716_CBD20_28d; DEG_GSE272113_CBD
ZZEF1	11	6	DEG_GSE168797_SARS_CBD; DEG_GSE168797_SARS_CBDV; DEG_GSE201508_enthanol; DEG_GSE232624_Veh_CBD3_12h; DEG_GSE261716_CBD10_28d; DEG_GSE261716_CBD20_28d	5	DEG_GSE131565; DEG_GSE151512_24h; DEG_GSE179661_HepG2; DEG_GSE201508_cGAMP; DEG_GSE232624_EtOH0.25_CBD0.75_12h
AACS	10	3	DEG_GSE235310_LPS; DEG_GSE274435_DMSO_24h; DEG_GSE274859_LPS_24h	7	DEG_GSE131565; DEG_GSE151512_12h; DEG_GSE151512_24h; DEG_GSE179661_HepG2; DEG_GSE232624_EtOH0.25_CBD0.75_12h; DEG_GSE272113_CBD; DEG_GSE272113_sCBD
ABCC1	10	4	DEG_GSE131565; DEG_GSE168797_Mock_CBD; DEG_GSE168797_SARS_CBD; DEG_GSE179661_MHCC97H	6	DEG_GSE151512_12h; DEG_GSE151512_24h; DEG_GSE179661_HepG2; DEG_GSE235310_LPS; DEG_GSE272113_CBD; DEG_GSE272113_sCBD
ABCG1	10	4	DEG_GSE168797_Mock_CBDV; DEG_GSE261716_CBD20_28d; DEG_GSE272113_CBD; DEG_GSE272113_sCBD	6	DEG_GSE131565; DEG_GSE151512_24h; DEG_GSE168797_SARS_CBD; DEG_GSE168797_SARS_CBDV; DEG_GSE235310_Veh; DEG_GSE274859_LPS_24h
ABHD15	10	7	DEG_GSE131565; DEG_GSE168797_Mock_CBD; DEG_GSE179661_HepG2; DEG_GSE179661_MHCC97H; DEG_GSE201508_cGAMP; DEG_GSE235310_Veh; DEG_GSE274859_LPS_24h	3	DEG_GSE261716_CBD0.2_28d; DEG_GSE261716_CBD10_28d; DEG_GSE261716_CBD20_28d
ABHD8	10	5	DEG_GSE261716_CBD0.2_28d; DEG_GSE261716_CBD20_28d; DEG_GSE272113_CBD; DEG_GSE272113_sCBD; DEG_GSE274859_LPS_24h	5	DEG_GSE152088; DEG_GSE168797_SARS_CBD; DEG_GSE179661_HepG2; DEG_GSE179661_MHCC97H; DEG_GSE235310_LPS
ACAD11	10	3	DEG_GSE179661_HepG2; DEG_GSE272113_CBD; DEG_GSE272113_sCBD	7	DEG_GSE151512_12h; DEG_GSE151512_24h; DEG_GSE168797_Mock_CBD; DEG_GSE168797_SARS_CBD; DEG_GSE179661_MHCC97H; DEG_GSE261716_CBD0.2_28d; DEG_GSE274859_LPS_24h
ACVR1	10	0	NA	10	DEG_GSE131565; DEG_GSE151512_12h; DEG_GSE151512_24h; DEG_GSE168797_Mock_CBD; DEG_GSE168797_SARS_CBD; DEG_GSE179661_HepG2; DEG_GSE179661_MHCC97H; DEG_GSE201508_cGAMP; DEG_GSE235310_LPS; DEG_GSE235310_Veh
ADAMTS7	10	7	DEG_GSE131565; DEG_GSE168797_Mock_CBD; DEG_GSE168797_SARS_CBD; DEG_GSE179661_MHCC97H; DEG_GSE261716_CBD0.2_28d; DEG_GSE261716_CBD20_28d; DEG_GSE266113_WT	3	DEG_GSE151512_12h; DEG_GSE151512_24h; DEG_GSE272113_CBD
ADARB1	10	9	DEG_GSE152088; DEG_GSE168797_Mock_CBD; DEG_GSE168797_Mock_CBDV; DEG_GSE168797_SARS_CBD; DEG_GSE272113_CBD; DEG_GSE272113_sCBD; DEG_GSE274435_DMSO_24h; DEG_GSE274859_LPS_24h; GSE70689_CBD_wLPS	1	DEG_GSE235310_Veh
ADCY3	10	4	DEG_GSE131565; DEG_GSE168797_Mock_CBD; DEG_GSE168797_SARS_CBD; DEG_GSE179661_MHCC97H	6	DEG_GSE151512_12h; DEG_GSE235310_LPS; DEG_GSE235310_Veh; DEG_GSE272113_CBD; DEG_GSE272113_sCBD; DEG_GSE274859_LPS_24h
ADGRE5	10	6	DEG_GSE168797_Mock_CBD; DEG_GSE168797_SARS_CBD; DEG_GSE201508_cGAMP; DEG_GSE201508_enthanol; DEG_GSE272113_CBD; DEG_GSE272113_sCBD	4	DEG_GSE131565; DEG_GSE151512_24h; DEG_GSE179661_HepG2; DEG_GSE235310_LPS
ADNP2	10	4	DEG_GSE168797_SARS_CBD; DEG_GSE261716_CBD10_28d; DEG_GSE261716_CBD20_28d; DEG_GSE261716_CBD20_2d	6	DEG_GSE131565; DEG_GSE151512_24h; DEG_GSE179661_MHCC97H; DEG_GSE232624_Veh_CBD3_12h; DEG_GSE272113_CBD; DEG_GSE272113_sCBD
ADPGK	10	7	DEG_GSE131565; DEG_GSE151512_3h; DEG_GSE179661_HepG2; DEG_GSE179661_MHCC97H; DEG_GSE201508_cGAMP; DEG_GSE201508_enthanol; DEG_GSE274859_LPS_24h	3	DEG_GSE168797_SARS_CBD; DEG_GSE235310_LPS; DEG_GSE235310_Veh
ADRM1	10	2	DEG_GSE168797_Mock_CBDV; DEG_GSE201508_cGAMP	8	DEG_GSE131565; DEG_GSE168797_Mock_CBD; DEG_GSE168797_SARS_CBD; DEG_GSE168797_SARS_CBDV; DEG_GSE179661_HepG2; DEG_GSE179661_MHCC97H; DEG_GSE232624_EtOH0.75_CBD0.75_6h; DEG_GSE235310_Veh
AEN	10	4	DEG_GSE131565; DEG_GSE201508_cGAMP; DEG_GSE235310_LPS; DEG_GSE274859_LPS_24h	6	DEG_GSE151512_12h; DEG_GSE168797_Mock_CBD; DEG_GSE168797_SARS_CBD; DEG_GSE179661_HepG2; DEG_GSE179661_MHCC97H; DEG_GSE235310_Veh
AFDN	10	6	DEG_GSE168797_SARS_CBD; DEG_GSE235310_LPS; DEG_GSE235310_Veh; DEG_GSE261716_CBD0.2_28d; DEG_GSE261716_CBD10_28d; DEG_GSE261716_CBD20_28d	4	DEG_GSE131565; DEG_GSE151512_12h; DEG_GSE151512_24h; DEG_GSE179661_MHCC97H
AGFG1	10	2	DEG_GSE152088; DEG_GSE232624_Veh_CBD0.75_12h	8	DEG_GSE131565; DEG_GSE168797_Mock_CBD; DEG_GSE168797_SARS_CBD; DEG_GSE179661_HepG2; DEG_GSE179661_MHCC97H; DEG_GSE272113_CBD; DEG_GSE272113_sCBD; DEG_GSE274859_LPS_24h
AHR	10	3	DEG_GSE168797_SARS_CBDV; DEG_GSE235310_LPS; DEG_GSE235310_Veh	7	DEG_GSE168797_Mock_CBD; DEG_GSE168797_Mock_CBDV; DEG_GSE179661_HepG2; DEG_GSE179661_MHCC97H; DEG_GSE261716_CBD20_28d; DEG_GSE272113_CBD; DEG_GSE272113_sCBD
ALCAM	10	4	DEG_GSE168797_Mock_CBD; DEG_GSE168797_SARS_CBD; DEG_GSE179661_HepG2; DEG_GSE179661_MHCC97H	6	DEG_GSE131565; DEG_GSE151512_12h; DEG_GSE151512_24h; DEG_GSE235310_LPS; DEG_GSE235310_Veh; DEG_GSE274859_LPS_24h
ALDH2	10	5	DEG_GSE179661_MHCC97H; DEG_GSE201508_cGAMP; DEG_GSE232624_Veh_CBD0.75_12h; DEG_GSE235310_LPS; DEG_GSE261716_CBD20_28d	5	DEG_GSE168797_SARS_CBD; DEG_GSE168797_SARS_CBDV; DEG_GSE179661_HepG2; DEG_GSE235310_Veh; DEG_GSE274859_LPS_24h
ALG2	10	2	DEG_GSE152088; DEG_GSE235310_LPS	8	DEG_GSE131565; DEG_GSE168797_Mock_CBD; DEG_GSE168797_SARS_CBD; DEG_GSE179661_MHCC97H; DEG_GSE272113_CBD; DEG_GSE272113_sCBD; DEG_GSE274859_LPS_24h; GSE70689_CBD_wLPS
ANGPT1	10	9	DEG_GSE131565; DEG_GSE151512_12h; DEG_GSE151512_24h; DEG_GSE151512_6h; DEG_GSE168797_Mock_CBD; DEG_GSE168797_SARS_CBDV; DEG_GSE179661_MHCC97H; DEG_GSE272113_CBD; DEG_GSE272113_sCBD	1	DEG_GSE168797_Mock_CBDV
ANGPTL4	10	3	DEG_GSE168797_Mock_CBDV; DEG_GSE235310_LPS; DEG_GSE274859_LPS_24h	7	DEG_GSE168797_Mock_CBD; DEG_GSE168797_SARS_CBD; DEG_GSE179661_MHCC97H; DEG_GSE235310_Veh; DEG_GSE266113_WT; DEG_GSE272113_CBD; DEG_GSE272113_sCBD
ANTXR2	10	3	DEG_GSE179661_MHCC97H; DEG_GSE235310_LPS; DEG_GSE274859_LPS_24h	7	DEG_GSE131565; DEG_GSE168797_Mock_CBD; DEG_GSE168797_SARS_CBD; DEG_GSE179661_HepG2; DEG_GSE201508_cGAMP; DEG_GSE272113_CBD; DEG_GSE272113_sCBD
AP3D1	10	2	DEG_GSE261716_CBD10_28d; DEG_GSE261716_CBD20_28d	8	DEG_GSE131565; DEG_GSE168797_Mock_CBD; DEG_GSE179661_HepG2; DEG_GSE179661_MHCC97H; DEG_GSE201508_cGAMP; DEG_GSE235310_LPS; DEG_GSE272113_CBD; DEG_GSE274859_LPS_24h
APIP	10	3	DEG_GSE179661_HepG2; DEG_GSE272113_CBD; DEG_GSE272113_sCBD	7	DEG_GSE151512_24h; DEG_GSE151512_6h; DEG_GSE168797_SARS_CBDV; DEG_GSE261716_CBD0.2_28d; DEG_GSE261716_CBD10_28d; DEG_GSE261716_CBD20_28d; DEG_GSE274859_LPS_24h
ARC	10	3	DEG_GSE168797_SARS_CBDV; DEG_GSE274435_DMSO_24h; DEG_GSE274435_EtOH_24h	7	DEG_GSE131565; DEG_GSE151512_12h; DEG_GSE151512_24h; DEG_GSE168797_Mock_CBD; DEG_GSE168797_SARS_CBD; DEG_GSE179661_HepG2; DEG_GSE235310_Veh
AREG	10	5	DEG_GSE131565; DEG_GSE152088; DEG_GSE168797_Mock_CBDV; DEG_GSE272113_CBD; DEG_GSE274859_LPS_24h	5	DEG_GSE168797_Mock_CBD; DEG_GSE168797_SARS_CBD; DEG_GSE179661_HepG2; DEG_GSE179661_MHCC97H; DEG_GSE232624_EtOH0.75_CBD0.75_6h
ARHGAP26	10	4	DEG_GSE168797_SARS_CBDV; DEG_GSE232624_EtOH0.75_CBD0.75_6h; DEG_GSE274435_DMSO_24h; DEG_GSE274859_LPS_24h	6	DEG_GSE131565; DEG_GSE179661_MHCC97H; DEG_GSE201508_cGAMP; DEG_GSE235310_LPS; DEG_GSE272113_CBD; DEG_GSE272113_sCBD
ARL8A	10	0	NA	10	DEG_GSE131565; DEG_GSE152088; DEG_GSE168797_Mock_CBD; DEG_GSE168797_SARS_CBD; DEG_GSE179661_HepG2; DEG_GSE179661_MHCC97H; DEG_GSE201508_cGAMP; DEG_GSE272113_CBD; DEG_GSE272113_sCBD; DEG_GSE274859_LPS_24h
ATP2A2	10	3	DEG_GSE179661_MHCC97H; GSE70689_CBD_NoLPS; GSE70689_CBD_wLPS	7	DEG_GSE131565; DEG_GSE168797_Mock_CBD; DEG_GSE179661_HepG2; DEG_GSE201508_cGAMP; DEG_GSE201508_enthanol; DEG_GSE235310_LPS; DEG_GSE272113_CBD
ATP6V0A2	10	1	DEG_GSE232624_Veh_CBD3_12h	9	DEG_GSE131565; DEG_GSE151512_12h; DEG_GSE151512_6h; DEG_GSE168797_Mock_CBD; DEG_GSE168797_SARS_CBD; DEG_GSE179661_HepG2; DEG_GSE201508_cGAMP; DEG_GSE261716_CBD20_28d; DEG_GSE274859_LPS_24h
AURKA	10	9	DEG_GSE131565; DEG_GSE151512_12h; DEG_GSE151512_6h; DEG_GSE168797_Mock_CBD; DEG_GSE168797_SARS_CBD; DEG_GSE179661_HepG2; DEG_GSE179661_MHCC97H; DEG_GSE235310_Veh; DEG_GSE274859_LPS_24h	1	DEG_GSE235310_LPS
AXL	10	6	DEG_GSE131565; DEG_GSE168797_Mock_CBD; DEG_GSE168797_Mock_CBDV; DEG_GSE168797_SARS_CBD; DEG_GSE201508_cGAMP; DEG_GSE261716_CBD0.2_2d	4	DEG_GSE179661_HepG2; DEG_GSE235310_LPS; DEG_GSE235310_Veh; DEG_GSE272113_CBD
AZI2	10	0	NA	10	DEG_GSE131565; DEG_GSE168797_Mock_CBD; DEG_GSE168797_SARS_CBD; DEG_GSE179661_HepG2; DEG_GSE179661_MHCC97H; DEG_GSE201508_cGAMP; DEG_GSE235310_LPS; DEG_GSE235310_Veh; DEG_GSE261716_CBD20_28d; DEG_GSE274859_LPS_24h
BAHCC1	10	8	DEG_GSE131565; DEG_GSE151512_24h; DEG_GSE168797_SARS_CBD; DEG_GSE168797_SARS_CBDV; DEG_GSE179661_HepG2; DEG_GSE179661_MHCC97H; DEG_GSE272113_CBD; DEG_GSE274859_LPS_24h	2	DEG_GSE201508_cGAMP; DEG_GSE235310_LPS
BHLHE41	10	4	DEG_GSE168797_SARS_CBD; DEG_GSE168797_SARS_CBDV; DEG_GSE272113_CBD; DEG_GSE272113_sCBD	6	DEG_GSE131565; DEG_GSE151512_24h; DEG_GSE168797_Mock_CBD; DEG_GSE235310_LPS; DEG_GSE235310_Veh; DEG_GSE275998_CDB20
BLVRB	10	0	NA	10	DEG_GSE131565; DEG_GSE152088; DEG_GSE168797_Mock_CBD; DEG_GSE168797_SARS_CBD; DEG_GSE168797_SARS_CBDV; DEG_GSE179661_HepG2; DEG_GSE179661_MHCC97H; DEG_GSE235310_LPS; DEG_GSE261716_CBD20_2d; DEG_GSE272113_sCBD
BRI3BP	10	6	DEG_GSE131565; DEG_GSE168797_Mock_CBD; DEG_GSE168797_SARS_CBD; DEG_GSE179661_HepG2; DEG_GSE179661_MHCC97H; DEG_GSE274859_LPS_24h	4	DEG_GSE151512_6h; DEG_GSE266113_WT; DEG_GSE272113_CBD; DEG_GSE272113_sCBD
BSDC1	10	3	DEG_GSE151512_12h; DEG_GSE151512_24h; DEG_GSE151512_6h	7	DEG_GSE131565; DEG_GSE168797_Mock_CBD; DEG_GSE168797_SARS_CBD; DEG_GSE179661_HepG2; DEG_GSE179661_MHCC97H; DEG_GSE261716_CBD0.2_28d; DEG_GSE274859_LPS_24h
BTG2	10	7	DEG_GSE151512_6h; DEG_GSE168797_SARS_CBDV; DEG_GSE179661_HepG2; DEG_GSE201508_cGAMP; DEG_GSE235310_Veh; DEG_GSE272113_CBD; DEG_GSE272113_sCBD	3	DEG_GSE168797_Mock_CBD; DEG_GSE179661_MHCC97H; DEG_GSE235310_LPS
BZW1	10	5	DEG_GSE151512_24h; DEG_GSE179661_MHCC97H; DEG_GSE232624_EtOH0.25_CBD0.75_12h; DEG_GSE232624_EtOH0.75_CBD0.75_12h; DEG_GSE235310_LPS	5	DEG_GSE131565; DEG_GSE179661_HepG2; DEG_GSE232624_Veh_CBD3_12h; DEG_GSE261716_CBD20_28d; DEG_GSE272113_CBD
C2CD2L	10	1	DEG_GSE274435_DMSO_24h	9	DEG_GSE131565; DEG_GSE151512_12h; DEG_GSE151512_24h; DEG_GSE168797_Mock_CBD; DEG_GSE179661_HepG2; DEG_GSE179661_MHCC97H; DEG_GSE235310_LPS; DEG_GSE272113_CBD; DEG_GSE274859_LPS_24h
C2CD5	10	7	DEG_GSE131565; DEG_GSE168797_Mock_CBD; DEG_GSE168797_SARS_CBD; DEG_GSE179661_HepG2; DEG_GSE179661_MHCC97H; DEG_GSE261716_CBD0.2_2d; DEG_GSE261716_CBD20_2d	3	DEG_GSE235310_LPS; DEG_GSE235310_Veh; DEG_GSE272113_CBD
C5	10	6	DEG_GSE168797_Mock_CBD; DEG_GSE168797_SARS_CBD; DEG_GSE168797_SARS_CBDV; DEG_GSE179661_HepG2; DEG_GSE179661_MHCC97H; DEG_GSE201508_enthanol	4	DEG_GSE151512_12h; DEG_GSE151512_24h; DEG_GSE168797_Mock_CBDV; DEG_GSE235310_LPS
CAB39	10	6	DEG_GSE131565; DEG_GSE151512_12h; DEG_GSE151512_24h; DEG_GSE152088; DEG_GSE235310_LPS; DEG_GSE235310_Veh	4	DEG_GSE168797_Mock_CBD; DEG_GSE168797_SARS_CBD; DEG_GSE179661_MHCC97H; DEG_GSE274859_LPS_24h
CALM3	10	8	DEG_GSE131565; DEG_GSE151512_24h; DEG_GSE168797_Mock_CBD; DEG_GSE168797_SARS_CBD; DEG_GSE179661_HepG2; DEG_GSE179661_MHCC97H; DEG_GSE201508_cGAMP; DEG_GSE274859_LPS_24h	2	DEG_GSE152088; DEG_GSE261716_CBD0.2_2d
CALU	10	2	DEG_GSE179661_HepG2; DEG_GSE179661_MHCC97H	8	DEG_GSE131565; DEG_GSE168797_Mock_CBD; DEG_GSE168797_SARS_CBD; DEG_GSE201508_cGAMP; DEG_GSE235310_LPS; DEG_GSE235310_Veh; DEG_GSE272113_CBD; DEG_GSE274859_LPS_24h
CAMKK2	10	8	DEG_GSE151512_6h; DEG_GSE168797_Mock_CBD; DEG_GSE168797_SARS_CBD; DEG_GSE179661_HepG2; DEG_GSE235310_Veh; DEG_GSE261716_CBD20_28d; DEG_GSE261716_CBD20_2d; DEG_GSE274859_LPS_24h	2	DEG_GSE272113_CBD; DEG_GSE272113_sCBD
CARD14	10	4	DEG_GSE168797_SARS_CBD; DEG_GSE232624_EtOH0.75_CBD0.75_6h; DEG_GSE232624_Veh_CBD0.75_12h; DEG_GSE232624_Veh_CBD3_12h	6	DEG_GSE131565; DEG_GSE235310_LPS; DEG_GSE235310_Veh; DEG_GSE272113_CBD; DEG_GSE272113_sCBD; DEG_GSE274859_LPS_24h
CAVIN1	10	5	DEG_GSE131565; DEG_GSE168797_Mock_CBD; DEG_GSE168797_SARS_CBD; DEG_GSE272113_CBD; DEG_GSE272113_sCBD	5	DEG_GSE152088; DEG_GSE179661_HepG2; DEG_GSE232624_EtOH0.25_CBD0.75_12h; DEG_GSE235310_LPS; DEG_GSE235310_Veh
CBLB	10	3	DEG_GSE151512_12h; DEG_GSE235310_LPS; DEG_GSE272113_sCBD	7	DEG_GSE131565; DEG_GSE168797_Mock_CBD; DEG_GSE168797_SARS_CBD; DEG_GSE179661_HepG2; DEG_GSE179661_MHCC97H; DEG_GSE201508_cGAMP; DEG_GSE274859_LPS_24h
CBX1	10	10	DEG_GSE131565; DEG_GSE151512_12h; DEG_GSE151512_24h; DEG_GSE168797_Mock_CBD; DEG_GSE168797_SARS_CBD; DEG_GSE179661_MHCC97H; DEG_GSE201508_cGAMP; DEG_GSE235310_LPS; DEG_GSE272113_CBD; DEG_GSE272113_sCBD	0	NA
CCDC90B	10	4	DEG_GSE179661_HepG2; DEG_GSE235310_LPS; DEG_GSE272113_CBD; DEG_GSE272113_sCBD	6	DEG_GSE168797_Mock_CBD; DEG_GSE168797_SARS_CBD; DEG_GSE179661_MHCC97H; DEG_GSE261716_CBD20_28d; DEG_GSE261716_CBD20_2d; DEG_GSE274859_LPS_24h
CCNE1	10	6	DEG_GSE168797_Mock_CBD; DEG_GSE168797_SARS_CBD; DEG_GSE201508_cGAMP; DEG_GSE201508_enthanol; DEG_GSE274859_LPS_24h; GSE70689_CBD_NoLPS	4	DEG_GSE131565; DEG_GSE151512_3h; DEG_GSE272113_CBD; DEG_GSE272113_sCBD
CCNE2	10	8	DEG_GSE151512_24h; DEG_GSE168797_Mock_CBD; DEG_GSE168797_SARS_CBD; DEG_GSE179661_MHCC97H; DEG_GSE201508_cGAMP; DEG_GSE201508_enthanol; DEG_GSE274859_LPS_24h; GSE70689_CBD_NoLPS	2	DEG_GSE266113_WT; DEG_GSE272113_CBD
CD14	10	5	DEG_GSE168797_Mock_CBD; DEG_GSE168797_SARS_CBD; DEG_GSE179661_HepG2; DEG_GSE201508_cGAMP; DEG_GSE274859_LPS_24h	5	DEG_GSE131565; DEG_GSE235310_LPS; DEG_GSE235310_Veh; DEG_GSE272113_CBD; DEG_GSE272113_sCBD
CDC42BPG	10	7	DEG_GSE151512_12h; DEG_GSE151512_24h; DEG_GSE168797_Mock_CBD; DEG_GSE179661_MHCC97H; DEG_GSE261716_CBD20_28d; DEG_GSE272113_sCBD; DEG_GSE274859_LPS_24h	3	DEG_GSE131565; DEG_GSE152088; DEG_GSE179661_HepG2
CDCA7	10	8	DEG_GSE131565; DEG_GSE151512_24h; DEG_GSE168797_Mock_CBD; DEG_GSE168797_SARS_CBD; DEG_GSE179661_HepG2; DEG_GSE179661_MHCC97H; DEG_GSE235310_LPS; DEG_GSE274859_LPS_24h	2	DEG_GSE235310_Veh; DEG_GSE266113_WT
CDCA7L	10	6	DEG_GSE131565; DEG_GSE168797_Mock_CBD; DEG_GSE168797_Mock_CBDV; DEG_GSE168797_SARS_CBD; DEG_GSE179661_HepG2; DEG_GSE274859_LPS_24h	4	DEG_GSE151512_24h; DEG_GSE168797_SARS_CBDV; DEG_GSE235310_LPS; DEG_GSE272113_sCBD
CDK2AP1	10	9	DEG_GSE131565; DEG_GSE151512_12h; DEG_GSE151512_24h; DEG_GSE168797_Mock_CBD; DEG_GSE168797_SARS_CBD; DEG_GSE179661_HepG2; DEG_GSE272113_CBD; DEG_GSE272113_sCBD; DEG_GSE274859_LPS_24h	1	DEG_GSE201508_enthanol
CDK2AP2	10	3	DEG_GSE151512_12h; DEG_GSE235310_LPS; DEG_GSE235310_Veh	7	DEG_GSE131565; DEG_GSE152088; DEG_GSE168797_Mock_CBD; DEG_GSE168797_SARS_CBD; DEG_GSE179661_HepG2; DEG_GSE179661_MHCC97H; DEG_GSE201508_cGAMP
CDKN2AIPNL	10	8	DEG_GSE131565; DEG_GSE151512_24h; DEG_GSE168797_Mock_CBD; DEG_GSE168797_SARS_CBD; DEG_GSE179661_HepG2; DEG_GSE179661_MHCC97H; DEG_GSE201508_cGAMP; DEG_GSE235310_LPS	2	DEG_GSE232624_EtOH0.75_CBD0.75_12h; DEG_GSE274859_LPS_24h
CERK	10	7	DEG_GSE151512_12h; DEG_GSE151512_24h; DEG_GSE151512_6h; DEG_GSE168797_Mock_CBD; DEG_GSE168797_SARS_CBD; DEG_GSE179661_MHCC97H; DEG_GSE235310_Veh	3	DEG_GSE152088; DEG_GSE272113_CBD; DEG_GSE274859_LPS_24h
CFL1	10	9	DEG_GSE131565; DEG_GSE151512_12h; DEG_GSE151512_24h; DEG_GSE168797_Mock_CBD; DEG_GSE168797_SARS_CBD; DEG_GSE179661_MHCC97H; DEG_GSE235310_LPS; DEG_GSE235310_Veh; DEG_GSE274859_LPS_24h	1	DEG_GSE179661_HepG2
CGN	10	8	DEG_GSE179661_MHCC97H; DEG_GSE235310_LPS; DEG_GSE235310_Veh; DEG_GSE261716_CBD0.2_28d; DEG_GSE261716_CBD10_28d; DEG_GSE261716_CBD20_28d; DEG_GSE272113_CBD; DEG_GSE272113_sCBD	2	DEG_GSE131565; DEG_GSE151512_24h
CHEK1	10	8	DEG_GSE131565; DEG_GSE151512_12h; DEG_GSE151512_24h; DEG_GSE168797_Mock_CBD; DEG_GSE168797_SARS_CBD; DEG_GSE179661_HepG2; DEG_GSE201508_cGAMP; DEG_GSE274859_LPS_24h	2	DEG_GSE235310_LPS; DEG_GSE235310_Veh
CHPF	10	1	DEG_GSE261716_CBD20_28d	9	DEG_GSE168797_Mock_CBD; DEG_GSE168797_SARS_CBD; DEG_GSE168797_SARS_CBDV; DEG_GSE179661_HepG2; DEG_GSE179661_MHCC97H; DEG_GSE235310_LPS; DEG_GSE272113_CBD; DEG_GSE272113_sCBD; DEG_GSE274859_LPS_24h
CIC	10	8	DEG_GSE168797_Mock_CBD; DEG_GSE168797_SARS_CBD; DEG_GSE168797_SARS_CBDV; DEG_GSE201508_enthanol; DEG_GSE232624_Veh_CBD0.75_12h; DEG_GSE232624_Veh_CBD3_6h; DEG_GSE272113_CBD; DEG_GSE274859_LPS_24h	2	DEG_GSE179661_HepG2; DEG_GSE232624_EtOH0.25_CBD0.75_12h
CISH	10	6	DEG_GSE168797_Mock_CBD; DEG_GSE179661_MHCC97H; DEG_GSE201508_cGAMP; DEG_GSE235310_LPS; DEG_GSE261716_CBD0.2_2d; DEG_GSE274859_LPS_24h	4	DEG_GSE151512_24h; DEG_GSE179661_HepG2; DEG_GSE261716_CBD20_28d; DEG_GSE272113_CBD
CKAP2	10	10	DEG_GSE131565; DEG_GSE151512_24h; DEG_GSE168797_Mock_CBD; DEG_GSE168797_SARS_CBD; DEG_GSE179661_HepG2; DEG_GSE232624_Veh_CBD0.75_6h; DEG_GSE235310_LPS; DEG_GSE235310_Veh; DEG_GSE272113_CBD; DEG_GSE274859_LPS_24h	0	NA
CLMP	10	2	DEG_GSE131565; DEG_GSE168797_Mock_CBDV	8	DEG_GSE151512_12h; DEG_GSE151512_24h; DEG_GSE168797_Mock_CBD; DEG_GSE168797_SARS_CBD; DEG_GSE168797_SARS_CBDV; DEG_GSE266113_WT; DEG_GSE272113_CBD; DEG_GSE272113_sCBD
CLSPN	10	9	DEG_GSE131565; DEG_GSE151512_24h; DEG_GSE152088; DEG_GSE168797_Mock_CBD; DEG_GSE168797_SARS_CBD; DEG_GSE179661_HepG2; DEG_GSE179661_MHCC97H; DEG_GSE235310_LPS; DEG_GSE274859_LPS_24h	1	DEG_GSE266113_WT
CMTM3	10	3	DEG_GSE131565; DEG_GSE168797_Mock_CBDV; DEG_GSE168797_SARS_CBD	7	DEG_GSE152088; DEG_GSE179661_HepG2; DEG_GSE235310_LPS; DEG_GSE261716_CBD20_28d; DEG_GSE272113_CBD; DEG_GSE272113_sCBD; DEG_GSE274859_LPS_24h
CNN2	10	7	DEG_GSE131565; DEG_GSE168797_Mock_CBD; DEG_GSE168797_SARS_CBD; DEG_GSE179661_MHCC97H; DEG_GSE235310_Veh; DEG_GSE272113_CBD; DEG_GSE272113_sCBD	3	DEG_GSE151512_24h; DEG_GSE151512_3h; DEG_GSE179661_HepG2
CNNM2	10	1	DEG_GSE261716_CBD20_28d	9	DEG_GSE131565; DEG_GSE151512_24h; DEG_GSE168797_Mock_CBD; DEG_GSE168797_SARS_CBD; DEG_GSE179661_MHCC97H; DEG_GSE235310_LPS; DEG_GSE235310_Veh; DEG_GSE272113_sCBD; DEG_GSE274859_LPS_24h
CNTROB	10	10	DEG_GSE151512_12h; DEG_GSE151512_6h; DEG_GSE168797_Mock_CBD; DEG_GSE168797_SARS_CBD; DEG_GSE168797_SARS_CBDV; DEG_GSE235310_Veh; DEG_GSE261716_CBD10_28d; DEG_GSE261716_CBD20_28d; DEG_GSE270378_CBD1.5_24h; DEG_GSE272113_sCBD	0	NA
COL4A2	10	6	DEG_GSE131565; DEG_GSE151512_12h; DEG_GSE151512_24h; DEG_GSE151512_6h; DEG_GSE168797_Mock_CBD; GSE70689_CBD_wLPS	4	DEG_GSE152088; DEG_GSE201508_enthanol; DEG_GSE235310_LPS; DEG_GSE235310_Veh
COL5A3	10	7	DEG_GSE131565; DEG_GSE168797_SARS_CBD; DEG_GSE168797_SARS_CBDV; DEG_GSE179661_MHCC97H; DEG_GSE261716_CBD20_28d; DEG_GSE272113_CBD; DEG_GSE272113_sCBD	3	DEG_GSE168797_Mock_CBD; DEG_GSE274435_DMSO_24h; DEG_GSE274859_LPS_24h
CPEB1	10	1	DEG_GSE235310_LPS	9	DEG_GSE131565; DEG_GSE151512_24h; DEG_GSE168797_Mock_CBD; DEG_GSE272113_CBD; DEG_GSE272113_sCBD; DEG_GSE274435_DMSO_24h; DEG_GSE274435_EtOH_24h; DEG_GSE274859_LPS_24h; GSE70689_CBD_NoLPS
CREB3L2	10	4	DEG_GSE261716_CBD0.2_28d; DEG_GSE261716_CBD0.2_2d; DEG_GSE261716_CBD10_28d; DEG_GSE261716_CBD20_28d	6	DEG_GSE151512_24h; DEG_GSE179661_MHCC97H; DEG_GSE201508_cGAMP; DEG_GSE201508_enthanol; DEG_GSE235310_LPS; DEG_GSE235310_Veh
CREBRF	10	3	DEG_GSE168797_SARS_CBDV; DEG_GSE235310_LPS; DEG_GSE261716_CBD0.2_2d	7	DEG_GSE131565; DEG_GSE151512_24h; DEG_GSE168797_Mock_CBD; DEG_GSE179661_HepG2; DEG_GSE179661_MHCC97H; DEG_GSE201508_cGAMP; DEG_GSE274859_LPS_24h
CSE1L	10	10	DEG_GSE131565; DEG_GSE151512_24h; DEG_GSE152088; DEG_GSE168797_Mock_CBD; DEG_GSE168797_SARS_CBD; DEG_GSE179661_HepG2; DEG_GSE179661_MHCC97H; DEG_GSE201508_cGAMP; DEG_GSE235310_Veh; DEG_GSE274859_LPS_24h	0	NA
CST3	10	8	DEG_GSE151512_24h; DEG_GSE168797_Mock_CBD; DEG_GSE201508_cGAMP; DEG_GSE232624_EtOH0.75_CBD0.75_12h; DEG_GSE235310_LPS; DEG_GSE235310_Veh; DEG_GSE270378_CBD0.75_24h; DEG_GSE274859_LPS_24h	2	DEG_GSE168797_SARS_CBD; DEG_GSE168797_SARS_CBDV
CTH	10	0	NA	10	DEG_GSE131565; DEG_GSE168797_Mock_CBD; DEG_GSE168797_SARS_CBD; DEG_GSE179661_HepG2; DEG_GSE179661_MHCC97H; DEG_GSE201508_cGAMP; DEG_GSE235310_Veh; DEG_GSE261716_CBD20_28d; DEG_GSE261716_CBD20_2d; DEG_GSE272113_sCBD
CTNNAL1	10	5	DEG_GSE131565; DEG_GSE168797_Mock_CBD; DEG_GSE168797_SARS_CBD; DEG_GSE235310_Veh; DEG_GSE274859_LPS_24h	5	DEG_GSE151512_24h; DEG_GSE168797_Mock_CBDV; DEG_GSE179661_HepG2; DEG_GSE179661_MHCC97H; DEG_GSE272113_sCBD
CTSC	10	8	DEG_GSE131565; DEG_GSE168797_Mock_CBD; DEG_GSE168797_SARS_CBD; DEG_GSE179661_HepG2; DEG_GSE179661_MHCC97H; DEG_GSE232624_EtOH0.25_CBD0.75_6h; DEG_GSE235310_Veh; DEG_GSE274859_LPS_24h	2	DEG_GSE232624_Veh_CBD0.75_6h; DEG_GSE232624_Veh_CBD3_6h
CYP1B1	10	6	DEG_GSE151512_12h; DEG_GSE151512_24h; DEG_GSE151512_6h; DEG_GSE168797_Mock_CBDV; DEG_GSE272113_CBD; DEG_GSE272113_sCBD	4	DEG_GSE168797_Mock_CBD; DEG_GSE168797_SARS_CBD; DEG_GSE168797_SARS_CBDV; DEG_GSE235310_LPS
CYTH3	10	3	DEG_GSE131565; DEG_GSE168797_Mock_CBD; DEG_GSE168797_SARS_CBD	7	DEG_GSE151512_24h; DEG_GSE179661_HepG2; DEG_GSE179661_MHCC97H; DEG_GSE235310_LPS; DEG_GSE235310_Veh; DEG_GSE272113_CBD; DEG_GSE272113_sCBD
DBP	10	3	DEG_GSE168797_Mock_CBD; DEG_GSE168797_SARS_CBD; DEG_GSE168797_SARS_CBDV	7	DEG_GSE131565; DEG_GSE261716_CBD10_28d; DEG_GSE261716_CBD10_2d; DEG_GSE261716_CBD20_28d; DEG_GSE261716_CBD20_2d; DEG_GSE275998_CDB10; DEG_GSE275998_CDB20
DCTN1	10	10	DEG_GSE131565; DEG_GSE151512_24h; DEG_GSE168797_Mock_CBD; DEG_GSE168797_SARS_CBD; DEG_GSE179661_MHCC97H; DEG_GSE201508_cGAMP; DEG_GSE201508_enthanol; DEG_GSE235310_LPS; DEG_GSE261716_CBD20_28d; DEG_GSE272113_sCBD	0	NA
DDX21	10	4	DEG_GSE131565; DEG_GSE152088; DEG_GSE201508_cGAMP; DEG_GSE274859_LPS_24h	6	DEG_GSE151512_12h; DEG_GSE151512_24h; DEG_GSE168797_Mock_CBD; DEG_GSE168797_SARS_CBD; DEG_GSE235310_LPS; DEG_GSE272113_CBD
DDX46	10	10	DEG_GSE131565; DEG_GSE151512_12h; DEG_GSE151512_24h; DEG_GSE151512_6h; DEG_GSE168797_Mock_CBD; DEG_GSE179661_HepG2; DEG_GSE179661_MHCC97H; DEG_GSE201508_cGAMP; DEG_GSE235310_Veh; DEG_GSE274859_LPS_24h	0	NA
DDX58	10	6	DEG_GSE131565; DEG_GSE152088; DEG_GSE179661_HepG2; DEG_GSE201508_cGAMP; DEG_GSE232624_Veh_CBD0.75_12h; DEG_GSE232624_Veh_CBD3_12h	4	DEG_GSE168797_Mock_CBD; DEG_GSE168797_SARS_CBD; DEG_GSE179661_MHCC97H; DEG_GSE235310_Veh
DEPTOR	10	8	DEG_GSE131565; DEG_GSE235310_LPS; DEG_GSE235310_Veh; DEG_GSE261716_CBD10_28d; DEG_GSE261716_CBD20_28d; DEG_GSE272113_CBD; DEG_GSE272113_sCBD; DEG_GSE274859_LPS_24h	2	DEG_GSE151512_12h; DEG_GSE151512_24h
DHRS7	10	1	DEG_GSE235310_LPS	9	DEG_GSE131565; DEG_GSE151512_24h; DEG_GSE168797_Mock_CBD; DEG_GSE168797_SARS_CBD; DEG_GSE179661_HepG2; DEG_GSE179661_MHCC97H; DEG_GSE272113_sCBD; DEG_GSE274859_LPS_24h; GSE70689_CBD_NoLPS
DHRS9	10	1	DEG_GSE168797_Mock_CBDV	9	DEG_GSE131565; DEG_GSE168797_Mock_CBD; DEG_GSE168797_SARS_CBD; DEG_GSE168797_SARS_CBDV; DEG_GSE179661_HepG2; DEG_GSE179661_MHCC97H; DEG_GSE235310_LPS; DEG_GSE235310_Veh; DEG_GSE274859_LPS_24h
DNAJB1	10	2	DEG_GSE151512_12h; DEG_GSE151512_24h	8	DEG_GSE131565; DEG_GSE151512_3h; DEG_GSE151512_6h; DEG_GSE168797_Mock_CBD; DEG_GSE168797_SARS_CBD; DEG_GSE179661_HepG2; DEG_GSE179661_MHCC97H; DEG_GSE201508_cGAMP
DNHD1	10	3	DEG_GSE179661_HepG2; DEG_GSE261716_CBD0.2_2d; DEG_GSE261716_CBD10_2d	7	DEG_GSE131565; DEG_GSE151512_12h; DEG_GSE151512_24h; DEG_GSE168797_Mock_CBD; DEG_GSE168797_Mock_CBDV; DEG_GSE270378_CBD1.5_24h; DEG_GSE274859_LPS_24h
DOCK5	10	6	DEG_GSE131565; DEG_GSE168797_Mock_CBD; DEG_GSE168797_SARS_CBD; DEG_GSE232624_EtOH0.75_CBD0.75_6h; DEG_GSE232624_Veh_CBD0.75_12h; DEG_GSE274859_LPS_24h	4	DEG_GSE201508_cGAMP; DEG_GSE232624_EtOH0.25_CBD0.75_12h; DEG_GSE235310_LPS; DEG_GSE272113_CBD
DOK4	10	7	DEG_GSE151512_12h; DEG_GSE151512_24h; DEG_GSE151512_6h; DEG_GSE168797_Mock_CBD; DEG_GSE168797_SARS_CBD; DEG_GSE179661_MHCC97H; DEG_GSE201508_cGAMP	3	DEG_GSE131565; DEG_GSE168797_Mock_CBDV; DEG_GSE179661_HepG2
DPY19L1	10	3	DEG_GSE168797_Mock_CBD; DEG_GSE179661_MHCC97H; DEG_GSE274859_LPS_24h	7	DEG_GSE151512_24h; DEG_GSE232624_EtOH0.75_CBD0.75_6h; DEG_GSE232624_Veh_CBD3_12h; DEG_GSE272113_CBD; DEG_GSE272113_sCBD; DEG_GSE274435_DMSO_24h; DEG_GSE274435_EtOH_24h
DPYSL2	10	8	DEG_GSE131565; DEG_GSE151512_12h; DEG_GSE151512_24h; DEG_GSE151512_6h; DEG_GSE179661_HepG2; DEG_GSE235310_LPS; DEG_GSE235310_Veh; DEG_GSE274859_LPS_24h	2	DEG_GSE168797_SARS_CBD; DEG_GSE168797_SARS_CBDV
DST	10	8	DEG_GSE131565; DEG_GSE152088; DEG_GSE168797_Mock_CBD; DEG_GSE168797_SARS_CBD; DEG_GSE235310_LPS; DEG_GSE235310_Veh; DEG_GSE261716_CBD10_28d; DEG_GSE261716_CBD20_2d	2	DEG_GSE179661_HepG2; DEG_GSE179661_MHCC97H
EAF1	10	1	DEG_GSE168797_SARS_CBDV	9	DEG_GSE131565; DEG_GSE168797_Mock_CBD; DEG_GSE179661_HepG2; DEG_GSE179661_MHCC97H; DEG_GSE235310_LPS; DEG_GSE235310_Veh; DEG_GSE272113_CBD; DEG_GSE272113_sCBD; DEG_GSE274859_LPS_24h
EBP	10	5	DEG_GSE131565; DEG_GSE179661_MHCC97H; DEG_GSE235310_LPS; DEG_GSE235310_Veh; DEG_GSE261716_CBD0.2_28d	5	DEG_GSE151512_12h; DEG_GSE151512_24h; DEG_GSE151512_6h; DEG_GSE168797_SARS_CBDV; DEG_GSE261716_CBD0.2_2d
EI24	10	8	DEG_GSE131565; DEG_GSE151512_24h; DEG_GSE152088; DEG_GSE168797_Mock_CBD; DEG_GSE179661_HepG2; DEG_GSE179661_MHCC97H; DEG_GSE272113_CBD; DEG_GSE272113_sCBD	2	DEG_GSE261716_CBD0.2_28d; DEG_GSE261716_CBD0.2_2d
EIF1B	10	1	DEG_GSE274859_LPS_24h	9	DEG_GSE131565; DEG_GSE151512_24h; DEG_GSE168797_Mock_CBD; DEG_GSE168797_SARS_CBD; DEG_GSE179661_HepG2; DEG_GSE179661_MHCC97H; DEG_GSE235310_LPS; DEG_GSE235310_Veh; DEG_GSE261716_CBD0.2_2d
EIF2S1	10	6	DEG_GSE131565; DEG_GSE151512_12h; DEG_GSE151512_24h; DEG_GSE179661_MHCC97H; DEG_GSE201508_cGAMP; DEG_GSE274859_LPS_24h	4	DEG_GSE179661_HepG2; DEG_GSE232624_EtOH0.75_CBD0.75_12h; DEG_GSE261716_CBD20_28d; DEG_GSE266113_WT
EIF3E	10	3	DEG_GSE152088; DEG_GSE272113_CBD; DEG_GSE274859_LPS_24h	7	DEG_GSE151512_12h; DEG_GSE151512_24h; DEG_GSE168797_SARS_CBD; DEG_GSE179661_MHCC97H; DEG_GSE201508_cGAMP; DEG_GSE261716_CBD0.2_28d; DEG_GSE261716_CBD20_28d
ELF4	10	2	DEG_GSE261716_CBD0.2_2d; DEG_GSE274859_LPS_24h	8	DEG_GSE131565; DEG_GSE151512_12h; DEG_GSE151512_24h; DEG_GSE151512_6h; DEG_GSE179661_HepG2; DEG_GSE179661_MHCC97H; DEG_GSE235310_Veh; DEG_GSE272113_CBD
EMC2	10	2	DEG_GSE272113_CBD; DEG_GSE272113_sCBD	8	DEG_GSE151512_12h; DEG_GSE151512_24h; DEG_GSE151512_6h; DEG_GSE168797_Mock_CBD; DEG_GSE168797_SARS_CBD; DEG_GSE179661_MHCC97H; DEG_GSE201508_cGAMP; DEG_GSE261716_CBD20_28d
ERBIN	10	3	DEG_GSE168797_SARS_CBDV; DEG_GSE261716_CBD0.2_2d; DEG_GSE272113_sCBD	7	DEG_GSE131565; DEG_GSE179661_MHCC97H; DEG_GSE201508_cGAMP; DEG_GSE232624_EtOH0.75_CBD0.75_6h; DEG_GSE232624_Veh_CBD3_6h; DEG_GSE235310_LPS; DEG_GSE274859_LPS_24h
ERF	10	5	DEG_GSE131565; DEG_GSE168797_Mock_CBD; DEG_GSE168797_SARS_CBD; DEG_GSE179661_MHCC97H; DEG_GSE274859_LPS_24h	5	DEG_GSE151512_24h; DEG_GSE179661_HepG2; DEG_GSE235310_LPS; DEG_GSE272113_CBD; DEG_GSE272113_sCBD
F3	10	6	DEG_GSE131565; DEG_GSE152088; DEG_GSE179661_MHCC97H; DEG_GSE201508_cGAMP; DEG_GSE201508_enthanol; DEG_GSE266113_mutNdufs4	4	DEG_GSE151512_24h; DEG_GSE179661_HepG2; DEG_GSE235310_LPS; DEG_GSE274435_DMSO_24h
FAM136A	10	6	DEG_GSE131565; DEG_GSE151512_24h; DEG_GSE152088; DEG_GSE179661_HepG2; DEG_GSE179661_MHCC97H; DEG_GSE274859_LPS_24h	4	DEG_GSE168797_SARS_CBD; DEG_GSE261716_CBD20_2d; DEG_GSE272113_CBD; DEG_GSE272113_sCBD
FAM167A	10	5	DEG_GSE131565; DEG_GSE168797_Mock_CBD; DEG_GSE168797_SARS_CBD; DEG_GSE272113_CBD; DEG_GSE272113_sCBD	5	DEG_GSE151512_12h; DEG_GSE151512_24h; DEG_GSE151512_6h; DEG_GSE179661_MHCC97H; DEG_GSE274435_DMSO_24h
FAM168A	10	9	DEG_GSE131565; DEG_GSE151512_12h; DEG_GSE151512_24h; DEG_GSE151512_6h; DEG_GSE168797_Mock_CBD; DEG_GSE168797_SARS_CBD; DEG_GSE179661_HepG2; DEG_GSE179661_MHCC97H; DEG_GSE272113_sCBD	1	DEG_GSE235310_LPS
FAM171A1	10	10	DEG_GSE131565; DEG_GSE151512_12h; DEG_GSE151512_24h; DEG_GSE151512_6h; DEG_GSE168797_Mock_CBD; DEG_GSE168797_Mock_CBDV; DEG_GSE168797_SARS_CBD; DEG_GSE179661_MHCC97H; DEG_GSE235310_Veh; DEG_GSE261716_CBD10_28d	0	NA
FAM189A2	10	2	DEG_GSE168797_SARS_CBDV; DEG_GSE235310_Veh	8	DEG_GSE131565; DEG_GSE168797_Mock_CBD; DEG_GSE168797_SARS_CBD; DEG_GSE179661_HepG2; DEG_GSE201508_cGAMP; DEG_GSE201508_enthanol; DEG_GSE274435_DMSO_4h; DEG_GSE274435_EtOH_24h
FBXL19	10	5	DEG_GSE151512_24h; DEG_GSE151512_6h; DEG_GSE168797_Mock_CBD; DEG_GSE179661_MHCC97H; DEG_GSE201508_cGAMP	5	DEG_GSE152088; DEG_GSE168797_SARS_CBDV; DEG_GSE179661_HepG2; DEG_GSE272113_CBD; DEG_GSE272113_sCBD
FEN1	10	9	DEG_GSE131565; DEG_GSE151512_12h; DEG_GSE151512_24h; DEG_GSE168797_Mock_CBD; DEG_GSE168797_SARS_CBD; DEG_GSE179661_MHCC97H; DEG_GSE201508_cGAMP; DEG_GSE235310_LPS; DEG_GSE274859_LPS_24h	1	DEG_GSE266113_WT
FICD	10	0	NA	10	DEG_GSE131565; DEG_GSE168797_Mock_CBD; DEG_GSE168797_SARS_CBD; DEG_GSE179661_HepG2; DEG_GSE179661_MHCC97H; DEG_GSE201508_cGAMP; DEG_GSE235310_LPS; DEG_GSE235310_Veh; DEG_GSE274435_DMSO_4h; DEG_GSE274859_LPS_24h
FKBP11	10	0	NA	10	DEG_GSE131565; DEG_GSE151512_12h; DEG_GSE151512_24h; DEG_GSE168797_Mock_CBD; DEG_GSE168797_SARS_CBD; DEG_GSE179661_MHCC97H; DEG_GSE261716_CBD20_28d; DEG_GSE272113_CBD; DEG_GSE272113_sCBD; DEG_GSE274859_LPS_24h
FKBP2	10	0	NA	10	DEG_GSE131565; DEG_GSE168797_Mock_CBD; DEG_GSE168797_SARS_CBD; DEG_GSE179661_HepG2; DEG_GSE201508_cGAMP; DEG_GSE232624_EtOH0.75_CBD0.75_12h; DEG_GSE235310_LPS; DEG_GSE261716_CBD0.2_2d; DEG_GSE272113_sCBD; DEG_GSE274435_DMSO_24h
FKBP5	10	8	DEG_GSE131565; DEG_GSE151512_24h; DEG_GSE168797_Mock_CBD; DEG_GSE168797_SARS_CBD; DEG_GSE179661_HepG2; DEG_GSE179661_MHCC97H; DEG_GSE201508_cGAMP; DEG_GSE274859_LPS_24h	2	DEG_GSE261716_CBD0.2_28d; DEG_GSE272113_CBD
FLRT3	10	8	DEG_GSE131565; DEG_GSE151512_12h; DEG_GSE151512_24h; DEG_GSE151512_3h; DEG_GSE151512_6h; DEG_GSE168797_Mock_CBD; DEG_GSE168797_SARS_CBDV; DEG_GSE179661_MHCC97H	2	DEG_GSE168797_Mock_CBDV; DEG_GSE179661_HepG2
FNDC3A	10	2	DEG_GSE151512_24h; DEG_GSE168797_SARS_CBDV	8	DEG_GSE131565; DEG_GSE168797_Mock_CBD; DEG_GSE179661_MHCC97H; DEG_GSE201508_cGAMP; DEG_GSE235310_LPS; DEG_GSE235310_Veh; DEG_GSE272113_CBD; DEG_GSE272113_sCBD
FUS	10	9	DEG_GSE131565; DEG_GSE151512_12h; DEG_GSE151512_24h; DEG_GSE168797_Mock_CBD; DEG_GSE168797_SARS_CBD; DEG_GSE179661_MHCC97H; DEG_GSE235310_LPS; DEG_GSE261716_CBD20_2d; DEG_GSE274859_LPS_24h	1	DEG_GSE232624_Veh_CBD3_12h
GAB2	10	0	NA	10	DEG_GSE131565; DEG_GSE151512_24h; DEG_GSE168797_Mock_CBD; DEG_GSE168797_SARS_CBD; DEG_GSE179661_HepG2; DEG_GSE179661_MHCC97H; DEG_GSE201508_cGAMP; DEG_GSE235310_Veh; DEG_GSE272113_CBD; DEG_GSE274859_LPS_24h
GALNT2	10	5	DEG_GSE131565; DEG_GSE168797_Mock_CBD; DEG_GSE168797_SARS_CBD; DEG_GSE179661_MHCC97H; DEG_GSE270378_CBD0.75_24h	5	DEG_GSE179661_HepG2; DEG_GSE201508_cGAMP; DEG_GSE201508_enthanol; DEG_GSE235310_LPS; DEG_GSE235310_Veh
GEMIN5	10	8	DEG_GSE131565; DEG_GSE152088; DEG_GSE168797_Mock_CBD; DEG_GSE168797_SARS_CBD; DEG_GSE179661_HepG2; DEG_GSE179661_MHCC97H; DEG_GSE201508_cGAMP; DEG_GSE274859_LPS_24h	2	DEG_GSE266113_WT; DEG_GSE272113_CBD
GFOD1	10	5	DEG_GSE131565; DEG_GSE201508_cGAMP; DEG_GSE261716_CBD20_28d; DEG_GSE261716_CBD20_2d; DEG_GSE274859_LPS_24h	5	DEG_GSE151512_24h; DEG_GSE168797_Mock_CBDV; DEG_GSE179661_HepG2; DEG_GSE179661_MHCC97H; DEG_GSE235310_LPS
GGA2	10	5	DEG_GSE151512_24h; DEG_GSE168797_Mock_CBD; DEG_GSE179661_HepG2; DEG_GSE232624_EtOH0.75_CBD0.75_6h; DEG_GSE261716_CBD20_2d	5	DEG_GSE179661_MHCC97H; DEG_GSE201508_cGAMP; DEG_GSE201508_enthanol; DEG_GSE235310_Veh; DEG_GSE274859_LPS_24h
GINS1	10	9	DEG_GSE131565; DEG_GSE151512_24h; DEG_GSE168797_Mock_CBD; DEG_GSE168797_SARS_CBD; DEG_GSE179661_HepG2; DEG_GSE179661_MHCC97H; DEG_GSE201508_cGAMP; DEG_GSE235310_LPS; DEG_GSE274859_LPS_24h	1	DEG_GSE235310_Veh
GLMP	10	3	DEG_GSE168797_Mock_CBDV; DEG_GSE179661_MHCC97H; DEG_GSE261716_CBD20_28d	7	DEG_GSE151512_6h; DEG_GSE168797_Mock_CBD; DEG_GSE168797_SARS_CBD; DEG_GSE168797_SARS_CBDV; DEG_GSE201508_enthanol; DEG_GSE272113_sCBD; DEG_GSE274859_LPS_24h
GNAI2	10	8	DEG_GSE151512_24h; DEG_GSE151512_6h; DEG_GSE168797_Mock_CBD; DEG_GSE201508_cGAMP; DEG_GSE235310_LPS; DEG_GSE235310_Veh; DEG_GSE272113_CBD; DEG_GSE274859_LPS_24h	2	DEG_GSE131565; DEG_GSE179661_MHCC97H
GNG2	10	9	DEG_GSE131565; DEG_GSE151512_24h; DEG_GSE179661_MHCC97H; DEG_GSE232624_Veh_CBD0.75_12h; DEG_GSE232624_Veh_CBD3_12h; DEG_GSE235310_LPS; DEG_GSE272113_CBD; DEG_GSE272113_sCBD; DEG_GSE274859_LPS_24h	1	DEG_GSE232624_EtOH0.25_CBD0.75_12h
GNPTAB	10	8	DEG_GSE131565; DEG_GSE168797_Mock_CBD; DEG_GSE168797_SARS_CBD; DEG_GSE179661_HepG2; DEG_GSE179661_MHCC97H; DEG_GSE235310_LPS; DEG_GSE235310_Veh; GSE70689_CBD_wLPS	2	DEG_GSE272113_CBD; DEG_GSE272113_sCBD
GOLGA3	10	2	DEG_GSE151512_24h; DEG_GSE168797_SARS_CBDV	8	DEG_GSE131565; DEG_GSE168797_Mock_CBD; DEG_GSE168797_SARS_CBD; DEG_GSE179661_HepG2; DEG_GSE179661_MHCC97H; DEG_GSE201508_cGAMP; DEG_GSE235310_LPS; DEG_GSE272113_CBD
GPC1	10	7	DEG_GSE131565; DEG_GSE151512_24h; DEG_GSE151512_6h; DEG_GSE168797_Mock_CBD; DEG_GSE179661_MHCC97H; DEG_GSE201508_cGAMP; DEG_GSE235310_Veh	3	DEG_GSE152088; DEG_GSE179661_HepG2; DEG_GSE272113_CBD
GPD2	10	5	DEG_GSE131565; DEG_GSE152088; DEG_GSE168797_Mock_CBD; DEG_GSE179661_MHCC97H; DEG_GSE274859_LPS_24h	5	DEG_GSE168797_SARS_CBDV; DEG_GSE201508_cGAMP; DEG_GSE261716_CBD0.2_28d; DEG_GSE272113_CBD; DEG_GSE272113_sCBD
GPR176	10	3	DEG_GSE151512_12h; DEG_GSE151512_24h; DEG_GSE151512_6h	7	DEG_GSE131565; DEG_GSE168797_Mock_CBD; DEG_GSE168797_SARS_CBD; DEG_GSE179661_MHCC97H; DEG_GSE272113_CBD; DEG_GSE272113_sCBD; DEG_GSE274859_LPS_24h
GPRC5C	10	3	DEG_GSE168797_Mock_CBDV; DEG_GSE272113_CBD; DEG_GSE272113_sCBD	7	DEG_GSE131565; DEG_GSE168797_Mock_CBD; DEG_GSE168797_SARS_CBD; DEG_GSE168797_SARS_CBDV; DEG_GSE179661_HepG2; DEG_GSE274435_DMSO_24h; DEG_GSE274435_EtOH_24h
GPRIN1	10	8	DEG_GSE151512_12h; DEG_GSE151512_24h; DEG_GSE151512_6h; DEG_GSE168797_Mock_CBD; DEG_GSE168797_SARS_CBD; DEG_GSE201508_cGAMP; DEG_GSE272113_sCBD; DEG_GSE274435_DMSO_24h	2	DEG_GSE179661_HepG2; DEG_GSE266113_WT
GPSM1	10	6	DEG_GSE151512_24h; DEG_GSE168797_Mock_CBD; DEG_GSE272113_sCBD; DEG_GSE274859_LPS_24h; GSE70689_CBD_NoLPS; GSE70689_CBD_wLPS	4	DEG_GSE131565; DEG_GSE179661_HepG2; DEG_GSE179661_MHCC97H; DEG_GSE235310_LPS
GPT2	10	0	NA	10	DEG_GSE131565; DEG_GSE151512_12h; DEG_GSE151512_6h; DEG_GSE168797_SARS_CBD; DEG_GSE235310_LPS; DEG_GSE235310_Veh; DEG_GSE261716_CBD0.2_28d; DEG_GSE274859_LPS_24h; GSE70689_CBD_NoLPS; GSE70689_CBD_wLPS
GRAMD1A	10	6	DEG_GSE168797_Mock_CBD; DEG_GSE168797_SARS_CBD; DEG_GSE168797_SARS_CBDV; DEG_GSE179661_MHCC97H; DEG_GSE261716_CBD20_28d; DEG_GSE272113_CBD	4	DEG_GSE151512_12h; DEG_GSE151512_24h; DEG_GSE168797_Mock_CBDV; DEG_GSE179661_HepG2
GRK6	10	6	DEG_GSE131565; DEG_GSE151512_24h; DEG_GSE168797_Mock_CBD; DEG_GSE168797_SARS_CBD; DEG_GSE201508_cGAMP; DEG_GSE274859_LPS_24h	4	DEG_GSE179661_MHCC97H; DEG_GSE235310_LPS; DEG_GSE235310_Veh; DEG_GSE272113_CBD
GSE1	10	5	DEG_GSE168797_Mock_CBD; DEG_GSE168797_SARS_CBD; DEG_GSE168797_SARS_CBDV; DEG_GSE272113_sCBD; DEG_GSE274859_LPS_24h	5	DEG_GSE131565; DEG_GSE151512_24h; DEG_GSE152088; DEG_GSE179661_HepG2; DEG_GSE179661_MHCC97H
GTF3A	10	5	DEG_GSE131565; DEG_GSE168797_Mock_CBD; DEG_GSE168797_SARS_CBD; DEG_GSE179661_HepG2; DEG_GSE274859_LPS_24h	5	DEG_GSE151512_24h; DEG_GSE235310_Veh; DEG_GSE261716_CBD0.2_2d; DEG_GSE261716_CBD20_2d; DEG_GSE272113_sCBD
GTSE1	10	10	DEG_GSE131565; DEG_GSE151512_12h; DEG_GSE151512_24h; DEG_GSE151512_6h; DEG_GSE168797_Mock_CBD; DEG_GSE168797_SARS_CBD; DEG_GSE179661_HepG2; DEG_GSE179661_MHCC97H; DEG_GSE201508_cGAMP; DEG_GSE274859_LPS_24h	0	NA
GULP1	10	2	DEG_GSE272113_CBD; DEG_GSE272113_sCBD	8	DEG_GSE131565; DEG_GSE151512_12h; DEG_GSE151512_24h; DEG_GSE151512_6h; DEG_GSE168797_Mock_CBD; DEG_GSE168797_SARS_CBD; DEG_GSE179661_HepG2; DEG_GSE179661_MHCC97H
HBEGF	10	1	DEG_GSE274859_LPS_24h	9	DEG_GSE131565; DEG_GSE151512_24h; DEG_GSE168797_Mock_CBD; DEG_GSE168797_SARS_CBD; DEG_GSE179661_HepG2; DEG_GSE179661_MHCC97H; DEG_GSE235310_LPS; DEG_GSE235310_Veh; DEG_GSE266113_WT
HDAC9	10	7	DEG_GSE151512_12h; DEG_GSE151512_24h; DEG_GSE152088; DEG_GSE168797_SARS_CBD; DEG_GSE168797_SARS_CBDV; DEG_GSE274435_DMSO_24h; DEG_GSE274859_LPS_24h	3	DEG_GSE131565; DEG_GSE168797_Mock_CBD; DEG_GSE179661_MHCC97H
HDGF	10	9	DEG_GSE131565; DEG_GSE151512_12h; DEG_GSE151512_24h; DEG_GSE168797_Mock_CBD; DEG_GSE168797_SARS_CBD; DEG_GSE179661_MHCC97H; DEG_GSE201508_cGAMP; DEG_GSE261716_CBD0.2_28d; DEG_GSE274859_LPS_24h	1	DEG_GSE272113_sCBD
HEBP1	10	2	DEG_GSE131565; DEG_GSE235310_LPS	8	DEG_GSE151512_24h; DEG_GSE168797_Mock_CBD; DEG_GSE168797_SARS_CBD; DEG_GSE168797_SARS_CBDV; DEG_GSE179661_MHCC97H; DEG_GSE261716_CBD20_28d; DEG_GSE261716_CBD20_2d; DEG_GSE272113_sCBD
HECA	10	2	DEG_GSE261716_CBD20_28d; DEG_GSE274859_LPS_24h	8	DEG_GSE131565; DEG_GSE151512_12h; DEG_GSE151512_24h; DEG_GSE168797_Mock_CBD; DEG_GSE168797_SARS_CBD; DEG_GSE179661_HepG2; DEG_GSE179661_MHCC97H; DEG_GSE201508_cGAMP
HELLS	10	8	DEG_GSE131565; DEG_GSE151512_24h; DEG_GSE168797_Mock_CBD; DEG_GSE168797_SARS_CBD; DEG_GSE179661_HepG2; DEG_GSE179661_MHCC97H; DEG_GSE235310_LPS; DEG_GSE274859_LPS_24h	2	DEG_GSE266113_WT; DEG_GSE272113_CBD
HEXA	10	1	DEG_GSE131565	9	DEG_GSE168797_Mock_CBD; DEG_GSE168797_SARS_CBD; DEG_GSE168797_SARS_CBDV; DEG_GSE201508_cGAMP; DEG_GSE235310_LPS; DEG_GSE235310_Veh; DEG_GSE272113_CBD; DEG_GSE272113_sCBD; DEG_GSE274859_LPS_24h
HGSNAT	10	5	DEG_GSE151512_24h; DEG_GSE168797_Mock_CBD; DEG_GSE179661_HepG2; DEG_GSE179661_MHCC97H; DEG_GSE235310_Veh	5	DEG_GSE131565; DEG_GSE201508_cGAMP; DEG_GSE201508_enthanol; DEG_GSE272113_CBD; DEG_GSE272113_sCBD
HK1	10	4	DEG_GSE179661_MHCC97H; DEG_GSE201508_cGAMP; DEG_GSE261716_CBD20_2d; DEG_GSE274435_DMSO_24h	6	DEG_GSE131565; DEG_GSE168797_Mock_CBD; DEG_GSE168797_SARS_CBD; DEG_GSE179661_HepG2; DEG_GSE235310_LPS; DEG_GSE272113_CBD
HR	10	8	DEG_GSE131565; DEG_GSE151512_12h; DEG_GSE151512_24h; DEG_GSE151512_6h; DEG_GSE168797_Mock_CBD; DEG_GSE179661_MHCC97H; DEG_GSE235310_LPS; DEG_GSE235310_Veh	2	DEG_GSE152088; DEG_GSE168797_Mock_CBDV
HSD17B12	10	2	DEG_GSE179661_HepG2; DEG_GSE179661_MHCC97H	8	DEG_GSE151512_12h; DEG_GSE151512_24h; DEG_GSE168797_Mock_CBD; DEG_GSE168797_SARS_CBD; DEG_GSE235310_LPS; DEG_GSE272113_CBD; DEG_GSE272113_sCBD; DEG_GSE274859_LPS_24h
HSPA13	10	1	DEG_GSE151512_24h	9	DEG_GSE131565; DEG_GSE168797_Mock_CBD; DEG_GSE168797_SARS_CBD; DEG_GSE179661_HepG2; DEG_GSE179661_MHCC97H; DEG_GSE201508_cGAMP; DEG_GSE235310_Veh; DEG_GSE272113_CBD; DEG_GSE274859_LPS_24h
HSPA4L	10	4	DEG_GSE131565; DEG_GSE151512_24h; DEG_GSE152088; DEG_GSE179661_HepG2	6	DEG_GSE168797_Mock_CBD; DEG_GSE168797_SARS_CBD; DEG_GSE201508_cGAMP; DEG_GSE272113_CBD; DEG_GSE272113_sCBD; DEG_GSE274859_LPS_24h
HSPE1	10	4	DEG_GSE131565; DEG_GSE151512_24h; DEG_GSE179661_HepG2; DEG_GSE179661_MHCC97H	6	DEG_GSE151512_6h; DEG_GSE168797_SARS_CBD; DEG_GSE168797_SARS_CBDV; DEG_GSE201508_cGAMP; DEG_GSE261716_CBD20_28d; DEG_GSE272113_sCBD
ICMT	10	9	DEG_GSE131565; DEG_GSE151512_24h; DEG_GSE168797_Mock_CBD; DEG_GSE168797_SARS_CBD; DEG_GSE179661_HepG2; DEG_GSE179661_MHCC97H; DEG_GSE201508_cGAMP; DEG_GSE201508_enthanol; DEG_GSE261716_CBD20_28d	1	DEG_GSE272113_CBD
IFIT3	10	5	DEG_GSE131565; DEG_GSE152088; DEG_GSE179661_HepG2; DEG_GSE201508_cGAMP; DEG_GSE232624_Veh_CBD0.75_12h	5	DEG_GSE168797_Mock_CBD; DEG_GSE168797_SARS_CBD; DEG_GSE179661_MHCC97H; DEG_GSE235310_LPS; DEG_GSE235310_Veh
IFT57	10	6	DEG_GSE131565; DEG_GSE179661_HepG2; DEG_GSE235310_LPS; DEG_GSE235310_Veh; DEG_GSE266113_WT; DEG_GSE274859_LPS_24h	4	DEG_GSE151512_12h; DEG_GSE151512_24h; DEG_GSE151512_6h; DEG_GSE179661_MHCC97H
IGF1R	10	7	DEG_GSE131565; DEG_GSE168797_Mock_CBDV; DEG_GSE168797_SARS_CBD; DEG_GSE168797_SARS_CBDV; DEG_GSE179661_MHCC97H; DEG_GSE232624_Veh_CBD0.75_12h; DEG_GSE232624_Veh_CBD3_12h	3	DEG_GSE151512_12h; DEG_GSE151512_24h; DEG_GSE151512_6h
IL18	10	4	DEG_GSE131565; DEG_GSE272113_CBD; DEG_GSE272113_sCBD; DEG_GSE274859_LPS_24h	6	DEG_GSE168797_Mock_CBDV; DEG_GSE168797_SARS_CBD; DEG_GSE179661_HepG2; DEG_GSE179661_MHCC97H; DEG_GSE235310_LPS; DEG_GSE235310_Veh
IL6ST	10	5	DEG_GSE152088; DEG_GSE168797_SARS_CBDV; DEG_GSE179661_MHCC97H; DEG_GSE235310_LPS; DEG_GSE261716_CBD10_28d	5	DEG_GSE131565; DEG_GSE151512_24h; DEG_GSE168797_Mock_CBD; DEG_GSE272113_CBD; DEG_GSE274859_LPS_24h
IMPDH1	10	8	DEG_GSE131565; DEG_GSE151512_6h; DEG_GSE168797_Mock_CBD; DEG_GSE179661_MHCC97H; DEG_GSE201508_cGAMP; DEG_GSE201508_enthanol; DEG_GSE235310_LPS; DEG_GSE235310_Veh	2	DEG_GSE179661_HepG2; DEG_GSE274859_LPS_24h
INAVA	10	7	DEG_GSE168797_Mock_CBD; DEG_GSE168797_SARS_CBD; DEG_GSE179661_MHCC97H; DEG_GSE201508_cGAMP; DEG_GSE201508_enthanol; DEG_GSE272113_CBD; DEG_GSE272113_sCBD	3	DEG_GSE131565; DEG_GSE152088; DEG_GSE179661_HepG2
ING1	10	2	DEG_GSE168797_SARS_CBDV; DEG_GSE274859_LPS_24h	8	DEG_GSE131565; DEG_GSE168797_Mock_CBD; DEG_GSE179661_HepG2; DEG_GSE179661_MHCC97H; DEG_GSE235310_LPS; DEG_GSE235310_Veh; DEG_GSE272113_CBD; DEG_GSE272113_sCBD
IRF5	10	4	DEG_GSE168797_Mock_CBDV; DEG_GSE261716_CBD0.2_28d; DEG_GSE261716_CBD0.2_2d; DEG_GSE274859_LPS_24h	6	DEG_GSE131565; DEG_GSE151512_24h; DEG_GSE168797_Mock_CBD; DEG_GSE168797_SARS_CBD; DEG_GSE179661_HepG2; DEG_GSE179661_MHCC97H
IRF6	10	9	DEG_GSE151512_12h; DEG_GSE151512_24h; DEG_GSE151512_6h; DEG_GSE168797_Mock_CBD; DEG_GSE168797_SARS_CBD; DEG_GSE179661_MHCC97H; DEG_GSE261716_CBD10_28d; DEG_GSE261716_CBD20_28d; DEG_GSE261716_CBD20_2d	1	DEG_GSE131565
IRS2	10	2	DEG_GSE168797_SARS_CBDV; DEG_GSE261716_CBD20_28d	8	DEG_GSE131565; DEG_GSE151512_12h; DEG_GSE151512_24h; DEG_GSE151512_6h; DEG_GSE179661_MHCC97H; DEG_GSE235310_LPS; DEG_GSE235310_Veh; DEG_GSE272113_CBD
ITGA5	10	4	DEG_GSE168797_Mock_CBDV; DEG_GSE179661_MHCC97H; DEG_GSE261716_CBD20_28d; DEG_GSE261716_CBD20_2d	6	DEG_GSE151512_24h; DEG_GSE168797_Mock_CBD; DEG_GSE179661_HepG2; DEG_GSE201508_cGAMP; DEG_GSE232624_EtOH0.75_CBD0.75_6h; DEG_GSE235310_LPS
ITM2C	10	8	DEG_GSE131565; DEG_GSE151512_12h; DEG_GSE168797_Mock_CBD; DEG_GSE179661_HepG2; DEG_GSE179661_MHCC97H; DEG_GSE201508_cGAMP; DEG_GSE235310_Veh; DEG_GSE266113_WT	2	DEG_GSE168797_SARS_CBDV; DEG_GSE274859_LPS_24h
ITPR3	10	5	DEG_GSE168797_Mock_CBDV; DEG_GSE168797_SARS_CBD; DEG_GSE179661_MHCC97H; DEG_GSE235310_LPS; DEG_GSE274859_LPS_24h	5	DEG_GSE131565; DEG_GSE151512_24h; DEG_GSE179661_HepG2; DEG_GSE272113_CBD; DEG_GSE272113_sCBD
IVNS1ABP	10	3	DEG_GSE131565; DEG_GSE168797_Mock_CBD; DEG_GSE168797_SARS_CBD	7	DEG_GSE151512_12h; DEG_GSE151512_24h; DEG_GSE151512_6h; DEG_GSE168797_Mock_CBDV; DEG_GSE179661_MHCC97H; DEG_GSE201508_cGAMP; DEG_GSE201508_enthanol
KCTD12	10	6	DEG_GSE131565; DEG_GSE151512_12h; DEG_GSE151512_24h; DEG_GSE201508_cGAMP; DEG_GSE201508_enthanol; GSE70689_CBD_NoLPS	4	DEG_GSE168797_Mock_CBD; DEG_GSE168797_SARS_CBD; DEG_GSE235310_LPS; DEG_GSE274859_LPS_24h
KDM3A	10	5	DEG_GSE151512_12h; DEG_GSE151512_24h; DEG_GSE168797_SARS_CBDV; DEG_GSE261716_CBD20_28d; DEG_GSE274435_DMSO_4h	5	DEG_GSE131565; DEG_GSE168797_Mock_CBD; DEG_GSE179661_HepG2; DEG_GSE179661_MHCC97H; DEG_GSE201508_cGAMP
KIAA1522	10	4	DEG_GSE151512_6h; DEG_GSE168797_Mock_CBD; DEG_GSE168797_SARS_CBD; DEG_GSE261716_CBD0.2_2d	6	DEG_GSE131565; DEG_GSE152088; DEG_GSE179661_HepG2; DEG_GSE272113_CBD; DEG_GSE272113_sCBD; DEG_GSE274859_LPS_24h
KLF11	10	2	DEG_GSE235310_LPS; DEG_GSE261716_CBD20_28d	8	DEG_GSE131565; DEG_GSE151512_12h; DEG_GSE151512_24h; DEG_GSE168797_Mock_CBD; DEG_GSE168797_SARS_CBD; DEG_GSE179661_HepG2; DEG_GSE179661_MHCC97H; DEG_GSE201508_cGAMP
KLF2	10	3	DEG_GSE201508_cGAMP; DEG_GSE266113_mutNdufs4; DEG_GSE274435_DMSO_24h	7	DEG_GSE151512_24h; DEG_GSE179661_HepG2; DEG_GSE179661_MHCC97H; DEG_GSE235310_LPS; DEG_GSE235310_Veh; DEG_GSE274859_LPS_24h; DEG_GSE275998_CDB20
KLF9	10	1	DEG_GSE168797_SARS_CBDV	9	DEG_GSE151512_12h; DEG_GSE151512_24h; DEG_GSE179661_HepG2; DEG_GSE179661_MHCC97H; DEG_GSE235310_LPS; DEG_GSE261716_CBD0.2_28d; DEG_GSE272113_CBD; DEG_GSE272113_sCBD; DEG_GSE274859_LPS_24h
KLHDC7B	10	1	DEG_GSE201508_enthanol	9	DEG_GSE131565; DEG_GSE151512_12h; DEG_GSE151512_24h; DEG_GSE152088; DEG_GSE168797_Mock_CBD; DEG_GSE168797_SARS_CBD; DEG_GSE179661_HepG2; DEG_GSE179661_MHCC97H; DEG_GSE235310_Veh
KPNB1	10	10	DEG_GSE131565; DEG_GSE151512_24h; DEG_GSE152088; DEG_GSE168797_Mock_CBD; DEG_GSE168797_SARS_CBD; DEG_GSE179661_HepG2; DEG_GSE179661_MHCC97H; DEG_GSE201508_cGAMP; DEG_GSE201508_enthanol; DEG_GSE274859_LPS_24h	0	NA
LAMP2	10	0	NA	10	DEG_GSE151512_24h; DEG_GSE168797_Mock_CBD; DEG_GSE168797_SARS_CBD; DEG_GSE201508_cGAMP; DEG_GSE235310_LPS; DEG_GSE235310_Veh; DEG_GSE261716_CBD20_28d; DEG_GSE272113_CBD; DEG_GSE272113_sCBD; DEG_GSE274859_LPS_24h
LAP3	10	3	DEG_GSE131565; DEG_GSE201508_cGAMP; DEG_GSE232624_EtOH0.25_CBD0.75_12h	7	DEG_GSE151512_12h; DEG_GSE151512_24h; DEG_GSE168797_SARS_CBD; DEG_GSE232624_EtOH0.75_CBD0.75_6h; DEG_GSE235310_Veh; DEG_GSE272113_CBD; DEG_GSE274435_DMSO_24h
LIX1L	10	9	DEG_GSE131565; DEG_GSE151512_6h; DEG_GSE168797_Mock_CBD; DEG_GSE168797_SARS_CBD; DEG_GSE179661_HepG2; DEG_GSE179661_MHCC97H; DEG_GSE235310_LPS; DEG_GSE235310_Veh; DEG_GSE272113_CBD	1	DEG_GSE151512_24h
LMAN2	10	1	DEG_GSE151512_24h	9	DEG_GSE131565; DEG_GSE152088; DEG_GSE168797_Mock_CBD; DEG_GSE168797_SARS_CBD; DEG_GSE179661_HepG2; DEG_GSE179661_MHCC97H; DEG_GSE235310_LPS; DEG_GSE272113_CBD; DEG_GSE272113_sCBD
LMCD1	10	4	DEG_GSE131565; DEG_GSE168797_Mock_CBDV; DEG_GSE235310_LPS; DEG_GSE266113_WT	6	DEG_GSE151512_24h; DEG_GSE168797_SARS_CBDV; DEG_GSE179661_HepG2; DEG_GSE179661_MHCC97H; DEG_GSE272113_CBD; DEG_GSE272113_sCBD
LMNB1	10	10	DEG_GSE131565; DEG_GSE151512_12h; DEG_GSE151512_24h; DEG_GSE168797_Mock_CBD; DEG_GSE168797_SARS_CBD; DEG_GSE179661_HepG2; DEG_GSE179661_MHCC97H; DEG_GSE201508_cGAMP; DEG_GSE235310_LPS; DEG_GSE274859_LPS_24h	0	NA
LMNB2	10	10	DEG_GSE131565; DEG_GSE151512_12h; DEG_GSE151512_24h; DEG_GSE151512_6h; DEG_GSE168797_Mock_CBD; DEG_GSE168797_SARS_CBD; DEG_GSE179661_MHCC97H; DEG_GSE201508_cGAMP; DEG_GSE235310_LPS; DEG_GSE274859_LPS_24h	0	NA
LOX	10	6	DEG_GSE151512_12h; DEG_GSE151512_24h; DEG_GSE179661_HepG2; DEG_GSE179661_MHCC97H; DEG_GSE232624_EtOH0.25_CBD0.75_12h; DEG_GSE235310_LPS	4	DEG_GSE168797_SARS_CBD; DEG_GSE272113_CBD; DEG_GSE272113_sCBD; DEG_GSE275998_CDB20
LRATD2	10	2	DEG_GSE168797_SARS_CBDV; DEG_GSE179661_HepG2	8	DEG_GSE131565; DEG_GSE151512_12h; DEG_GSE151512_24h; DEG_GSE168797_Mock_CBDV; DEG_GSE179661_MHCC97H; DEG_GSE201508_cGAMP; DEG_GSE235310_Veh; DEG_GSE272113_CBD
LRIF1	10	1	DEG_GSE152088	9	DEG_GSE131565; DEG_GSE168797_Mock_CBD; DEG_GSE168797_SARS_CBD; DEG_GSE179661_HepG2; DEG_GSE179661_MHCC97H; DEG_GSE261716_CBD20_28d; DEG_GSE272113_CBD; DEG_GSE272113_sCBD; DEG_GSE274859_LPS_24h
LRP3	10	8	DEG_GSE131565; DEG_GSE151512_12h; DEG_GSE151512_24h; DEG_GSE168797_Mock_CBD; DEG_GSE168797_Mock_CBDV; DEG_GSE179661_MHCC97H; DEG_GSE201508_cGAMP; DEG_GSE261716_CBD20_28d	2	DEG_GSE179661_HepG2; DEG_GSE235310_LPS
LRPPRC	10	6	DEG_GSE131565; DEG_GSE152088; DEG_GSE179661_HepG2; DEG_GSE179661_MHCC97H; DEG_GSE235310_Veh; DEG_GSE261716_CBD20_28d	4	DEG_GSE151512_24h; DEG_GSE270378_CBD0.75_24h; DEG_GSE272113_CBD; DEG_GSE272113_sCBD
LRRC57	10	4	DEG_GSE232624_EtOH0.75_CBD0.75_6h; DEG_GSE235310_LPS; DEG_GSE272113_CBD; DEG_GSE272113_sCBD	6	DEG_GSE168797_Mock_CBD; DEG_GSE179661_HepG2; DEG_GSE179661_MHCC97H; DEG_GSE235310_Veh; DEG_GSE261716_CBD20_28d; DEG_GSE274859_LPS_24h
LRRC8C	10	1	DEG_GSE235310_Veh	9	DEG_GSE151512_12h; DEG_GSE151512_24h; DEG_GSE151512_6h; DEG_GSE179661_HepG2; DEG_GSE201508_cGAMP; DEG_GSE261716_CBD20_28d; DEG_GSE266113_WT; DEG_GSE272113_CBD; DEG_GSE272113_sCBD
LRRK1	10	8	DEG_GSE131565; DEG_GSE168797_Mock_CBD; DEG_GSE168797_Mock_CBDV; DEG_GSE168797_SARS_CBD; DEG_GSE235310_LPS; DEG_GSE235310_Veh; DEG_GSE272113_CBD; DEG_GSE272113_sCBD	2	DEG_GSE168797_SARS_CBDV; DEG_GSE179661_HepG2
MAF1	10	4	DEG_GSE151512_12h; DEG_GSE151512_24h; DEG_GSE151512_6h; DEG_GSE168797_Mock_CBDV	6	DEG_GSE131565; DEG_GSE168797_Mock_CBD; DEG_GSE168797_SARS_CBD; DEG_GSE168797_SARS_CBDV; DEG_GSE179661_HepG2; DEG_GSE179661_MHCC97H
MAGED1	10	8	DEG_GSE151512_24h; DEG_GSE151512_6h; DEG_GSE179661_HepG2; DEG_GSE179661_MHCC97H; DEG_GSE235310_Veh; DEG_GSE272113_CBD; DEG_GSE272113_sCBD; DEG_GSE274859_LPS_24h	2	DEG_GSE131565; DEG_GSE168797_SARS_CBDV
MAP4K4	10	6	DEG_GSE151512_12h; DEG_GSE151512_24h; DEG_GSE179661_HepG2; DEG_GSE179661_MHCC97H; DEG_GSE235310_LPS; DEG_GSE261716_CBD10_28d	4	DEG_GSE168797_SARS_CBD; DEG_GSE235310_Veh; DEG_GSE272113_CBD; DEG_GSE274859_LPS_24h
MARCKS	10	6	DEG_GSE131565; DEG_GSE151512_12h; DEG_GSE151512_24h; DEG_GSE235310_LPS; DEG_GSE272113_CBD; DEG_GSE272113_sCBD	4	DEG_GSE152088; DEG_GSE179661_HepG2; DEG_GSE179661_MHCC97H; DEG_GSE201508_cGAMP
MCM3	10	9	DEG_GSE131565; DEG_GSE151512_12h; DEG_GSE151512_24h; DEG_GSE168797_Mock_CBD; DEG_GSE168797_SARS_CBD; DEG_GSE179661_HepG2; DEG_GSE179661_MHCC97H; DEG_GSE201508_cGAMP; DEG_GSE274859_LPS_24h	1	DEG_GSE266113_WT
MCOLN1	10	0	NA	10	DEG_GSE131565; DEG_GSE168797_Mock_CBD; DEG_GSE168797_SARS_CBD; DEG_GSE179661_HepG2; DEG_GSE179661_MHCC97H; DEG_GSE201508_cGAMP; DEG_GSE235310_LPS; DEG_GSE272113_CBD; DEG_GSE272113_sCBD; DEG_GSE274859_LPS_24h
MDFIC	10	2	DEG_GSE131565; DEG_GSE179661_MHCC97H	8	DEG_GSE179661_HepG2; DEG_GSE201508_cGAMP; DEG_GSE201508_enthanol; DEG_GSE272113_CBD; DEG_GSE272113_sCBD; DEG_GSE274435_DMSO_24h; DEG_GSE274435_EtOH_24h; DEG_GSE274859_LPS_24h
ME2	10	4	DEG_GSE152088; DEG_GSE168797_Mock_CBD; DEG_GSE179661_HepG2; DEG_GSE274859_LPS_24h	6	DEG_GSE151512_12h; DEG_GSE151512_24h; DEG_GSE151512_6h; DEG_GSE235310_Veh; DEG_GSE272113_CBD; DEG_GSE272113_sCBD
MEGF9	10	7	DEG_GSE131565; DEG_GSE168797_Mock_CBD; DEG_GSE168797_SARS_CBD; DEG_GSE179661_MHCC97H; DEG_GSE201508_cGAMP; DEG_GSE201508_enthanol; DEG_GSE272113_sCBD	3	DEG_GSE168797_Mock_CBDV; DEG_GSE179661_HepG2; DEG_GSE235310_LPS
MFSD12	10	3	DEG_GSE131565; DEG_GSE168797_Mock_CBDV; DEG_GSE261716_CBD20_2d	7	DEG_GSE179661_HepG2; DEG_GSE179661_MHCC97H; DEG_GSE235310_LPS; DEG_GSE235310_Veh; DEG_GSE272113_CBD; DEG_GSE272113_sCBD; DEG_GSE274859_LPS_24h
MFSD2A	10	4	DEG_GSE131565; DEG_GSE272113_CBD; DEG_GSE272113_sCBD; DEG_GSE274859_LPS_24h	6	DEG_GSE151512_12h; DEG_GSE151512_6h; DEG_GSE168797_Mock_CBD; DEG_GSE179661_HepG2; DEG_GSE235310_LPS; DEG_GSE235310_Veh
MFSD4B	10	4	DEG_GSE179661_HepG2; DEG_GSE179661_MHCC97H; DEG_GSE232624_EtOH0.75_CBD0.75_6h; DEG_GSE232624_Veh_CBD0.75_12h	6	DEG_GSE131565; DEG_GSE151512_24h; DEG_GSE201508_cGAMP; DEG_GSE232624_EtOH0.25_CBD0.75_12h; DEG_GSE235310_LPS; DEG_GSE235310_Veh
MFSD5	10	2	DEG_GSE151512_24h; DEG_GSE179661_MHCC97H	8	DEG_GSE131565; DEG_GSE168797_Mock_CBD; DEG_GSE168797_SARS_CBD; DEG_GSE168797_SARS_CBDV; DEG_GSE179661_HepG2; DEG_GSE272113_CBD; DEG_GSE272113_sCBD; DEG_GSE274859_LPS_24h
MMAB	10	6	DEG_GSE131565; DEG_GSE168797_Mock_CBD; DEG_GSE179661_MHCC97H; DEG_GSE235310_LPS; DEG_GSE235310_Veh; DEG_GSE274859_LPS_24h	4	DEG_GSE151512_12h; DEG_GSE151512_24h; DEG_GSE201508_cGAMP; DEG_GSE201508_enthanol
MOSPD2	10	0	NA	10	DEG_GSE131565; DEG_GSE151512_12h; DEG_GSE151512_24h; DEG_GSE151512_6h; DEG_GSE168797_Mock_CBD; DEG_GSE168797_SARS_CBD; DEG_GSE201508_cGAMP; DEG_GSE272113_CBD; DEG_GSE272113_sCBD; DEG_GSE274859_LPS_24h
MR1	10	8	DEG_GSE131565; DEG_GSE179661_HepG2; DEG_GSE179661_MHCC97H; DEG_GSE201508_cGAMP; DEG_GSE201508_enthanol; DEG_GSE266113_WT; DEG_GSE272113_CBD; DEG_GSE272113_sCBD	2	DEG_GSE151512_24h; DEG_GSE235310_Veh
MROH1	10	0	NA	10	DEG_GSE131565; DEG_GSE168797_Mock_CBD; DEG_GSE168797_SARS_CBD; DEG_GSE179661_HepG2; DEG_GSE179661_MHCC97H; DEG_GSE201508_cGAMP; DEG_GSE201508_enthanol; DEG_GSE274435_DMSO_24h; DEG_GSE274435_EtOH_24h; DEG_GSE274859_LPS_24h
MRPL42	10	5	DEG_GSE131565; DEG_GSE152088; DEG_GSE168797_Mock_CBD; DEG_GSE179661_MHCC97H; DEG_GSE274859_LPS_24h	5	DEG_GSE201508_cGAMP; DEG_GSE201508_enthanol; DEG_GSE235310_Veh; DEG_GSE261716_CBD20_28d; DEG_GSE261716_CBD20_2d
MRPL51	10	9	DEG_GSE131565; DEG_GSE151512_24h; DEG_GSE168797_Mock_CBD; DEG_GSE168797_SARS_CBD; DEG_GSE179661_HepG2; DEG_GSE179661_MHCC97H; DEG_GSE235310_LPS; DEG_GSE235310_Veh; DEG_GSE274859_LPS_24h	1	DEG_GSE261716_CBD0.2_2d
MSANTD3	10	2	DEG_GSE168797_Mock_CBDV; DEG_GSE274859_LPS_24h	8	DEG_GSE131565; DEG_GSE151512_24h; DEG_GSE168797_Mock_CBD; DEG_GSE179661_HepG2; DEG_GSE179661_MHCC97H; DEG_GSE235310_LPS; DEG_GSE235310_Veh; DEG_GSE272113_sCBD
MT1G	10	0	NA	10	DEG_GSE131565; DEG_GSE151512_12h; DEG_GSE151512_24h; DEG_GSE151512_3h; DEG_GSE151512_6h; DEG_GSE179661_HepG2; DEG_GSE179661_MHCC97H; DEG_GSE201508_cGAMP; DEG_GSE201508_enthanol; DEG_GSE235310_Veh
MTDH	10	2	DEG_GSE261716_CBD10_28d; DEG_GSE261716_CBD20_28d	8	DEG_GSE131565; DEG_GSE151512_12h; DEG_GSE168797_Mock_CBD; DEG_GSE168797_SARS_CBD; DEG_GSE179661_MHCC97H; DEG_GSE201508_cGAMP; DEG_GSE235310_LPS; DEG_GSE274859_LPS_24h
MTHFD1	10	7	DEG_GSE131565; DEG_GSE168797_Mock_CBD; DEG_GSE168797_SARS_CBD; DEG_GSE179661_HepG2; DEG_GSE179661_MHCC97H; DEG_GSE235310_Veh; DEG_GSE274859_LPS_24h	3	DEG_GSE266113_WT; DEG_GSE272113_CBD; DEG_GSE272113_sCBD
MVP	10	4	DEG_GSE131565; DEG_GSE235310_LPS; DEG_GSE235310_Veh; DEG_GSE261716_CBD20_28d	6	DEG_GSE152088; DEG_GSE168797_Mock_CBD; DEG_GSE168797_SARS_CBD; DEG_GSE168797_SARS_CBDV; DEG_GSE179661_HepG2; DEG_GSE179661_MHCC97H
MYC	10	2	DEG_GSE131565; DEG_GSE201508_cGAMP	8	DEG_GSE168797_Mock_CBD; DEG_GSE168797_SARS_CBD; DEG_GSE179661_HepG2; DEG_GSE179661_MHCC97H; DEG_GSE261716_CBD20_28d; DEG_GSE266113_WT; DEG_GSE272113_CBD; DEG_GSE272113_sCBD
NAGA	10	8	DEG_GSE131565; DEG_GSE151512_24h; DEG_GSE151512_6h; DEG_GSE168797_Mock_CBD; DEG_GSE168797_SARS_CBD; DEG_GSE179661_MHCC97H; DEG_GSE201508_cGAMP; DEG_GSE201508_enthanol	2	DEG_GSE235310_LPS; DEG_GSE274859_LPS_24h
NARF	10	7	DEG_GSE151512_24h; DEG_GSE151512_6h; DEG_GSE235310_LPS; DEG_GSE272113_CBD; DEG_GSE272113_sCBD; DEG_GSE274435_DMSO_24h; DEG_GSE274435_DMSO_4h	3	DEG_GSE179661_MHCC97H; DEG_GSE261716_CBD10_28d; DEG_GSE261716_CBD20_28d
NDC1	10	5	DEG_GSE131565; DEG_GSE168797_Mock_CBD; DEG_GSE168797_SARS_CBD; DEG_GSE179661_HepG2; DEG_GSE179661_MHCC97H	5	DEG_GSE235310_LPS; DEG_GSE266113_WT; DEG_GSE272113_CBD; DEG_GSE272113_sCBD; DEG_GSE274435_DMSO_24h
NECTIN1	10	7	DEG_GSE151512_12h; DEG_GSE151512_24h; DEG_GSE151512_6h; DEG_GSE168797_Mock_CBD; DEG_GSE179661_MHCC97H; DEG_GSE261716_CBD0.2_28d; DEG_GSE261716_CBD20_28d	3	DEG_GSE131565; DEG_GSE272113_CBD; DEG_GSE272113_sCBD
NEK6	10	6	DEG_GSE131565; DEG_GSE168797_Mock_CBD; DEG_GSE168797_Mock_CBDV; DEG_GSE168797_SARS_CBD; DEG_GSE179661_MHCC97H; DEG_GSE201508_enthanol	4	DEG_GSE235310_LPS; DEG_GSE272113_CBD; DEG_GSE272113_sCBD; DEG_GSE274859_LPS_24h
NEMP1	10	6	DEG_GSE131565; DEG_GSE168797_Mock_CBD; DEG_GSE168797_SARS_CBD; DEG_GSE179661_HepG2; DEG_GSE235310_Veh; DEG_GSE274859_LPS_24h	4	DEG_GSE151512_12h; DEG_GSE151512_24h; DEG_GSE201508_cGAMP; DEG_GSE266113_WT
NETO2	10	8	DEG_GSE131565; DEG_GSE151512_12h; DEG_GSE152088; DEG_GSE168797_Mock_CBD; DEG_GSE168797_SARS_CBD; DEG_GSE201508_cGAMP; DEG_GSE235310_LPS; DEG_GSE235310_Veh	2	DEG_GSE274435_DMSO_24h; DEG_GSE274435_EtOH_24h
NEXN	10	4	DEG_GSE131565; DEG_GSE201508_cGAMP; DEG_GSE272113_CBD; DEG_GSE272113_sCBD	6	DEG_GSE168797_SARS_CBD; DEG_GSE168797_SARS_CBDV; DEG_GSE179661_HepG2; DEG_GSE179661_MHCC97H; DEG_GSE235310_LPS; DEG_GSE235310_Veh
NFKBIA	10	5	DEG_GSE151512_24h; DEG_GSE151512_3h; DEG_GSE168797_Mock_CBDV; DEG_GSE168797_SARS_CBD; DEG_GSE168797_SARS_CBDV	5	DEG_GSE131565; DEG_GSE168797_Mock_CBD; DEG_GSE179661_HepG2; DEG_GSE179661_MHCC97H; DEG_GSE201508_enthanol
NMI	10	3	DEG_GSE131565; DEG_GSE179661_HepG2; DEG_GSE201508_cGAMP	7	DEG_GSE168797_Mock_CBD; DEG_GSE168797_SARS_CBD; DEG_GSE168797_SARS_CBDV; DEG_GSE179661_MHCC97H; DEG_GSE235310_Veh; DEG_GSE261716_CBD20_28d; DEG_GSE274859_LPS_24h
NOB1	10	2	DEG_GSE131565; DEG_GSE201508_cGAMP	8	DEG_GSE151512_12h; DEG_GSE151512_24h; DEG_GSE151512_3h; DEG_GSE151512_6h; DEG_GSE168797_Mock_CBD; DEG_GSE168797_SARS_CBD; DEG_GSE179661_HepG2; DEG_GSE235310_Veh
NRIP3	10	1	DEG_GSE232624_EtOH0.75_CBD0.75_12h	9	DEG_GSE131565; DEG_GSE151512_24h; DEG_GSE168797_Mock_CBD; DEG_GSE168797_SARS_CBD; DEG_GSE201508_cGAMP; DEG_GSE201508_enthanol; DEG_GSE235310_LPS; DEG_GSE235310_Veh; DEG_GSE266113_WT
NUDT14	10	5	DEG_GSE168797_Mock_CBD; DEG_GSE168797_SARS_CBD; DEG_GSE235310_LPS; DEG_GSE272113_CBD; DEG_GSE272113_sCBD	5	DEG_GSE131565; DEG_GSE152088; DEG_GSE168797_SARS_CBDV; DEG_GSE179661_HepG2; DEG_GSE261716_CBD0.2_2d
NUDT4	10	5	DEG_GSE179661_HepG2; DEG_GSE235310_LPS; DEG_GSE272113_CBD; DEG_GSE272113_sCBD; DEG_GSE274859_LPS_24h	5	DEG_GSE131565; DEG_GSE151512_24h; DEG_GSE179661_MHCC97H; DEG_GSE201508_cGAMP; DEG_GSE270378_CBD0.75_24h
NUP205	10	8	DEG_GSE131565; DEG_GSE151512_24h; DEG_GSE152088; DEG_GSE168797_Mock_CBD; DEG_GSE168797_SARS_CBD; DEG_GSE179661_HepG2; DEG_GSE179661_MHCC97H; DEG_GSE274859_LPS_24h	2	DEG_GSE266113_WT; DEG_GSE272113_CBD
ORMDL3	10	4	DEG_GSE151512_12h; DEG_GSE179661_HepG2; DEG_GSE235310_LPS; DEG_GSE261716_CBD20_28d	6	DEG_GSE131565; DEG_GSE168797_Mock_CBD; DEG_GSE168797_SARS_CBD; DEG_GSE168797_SARS_CBDV; DEG_GSE179661_MHCC97H; DEG_GSE274859_LPS_24h
OSTC	10	0	NA	10	DEG_GSE131565; DEG_GSE151512_6h; DEG_GSE168797_Mock_CBD; DEG_GSE168797_SARS_CBD; DEG_GSE179661_HepG2; DEG_GSE179661_MHCC97H; DEG_GSE201508_cGAMP; DEG_GSE235310_LPS; DEG_GSE272113_sCBD; DEG_GSE274859_LPS_24h
P2RX4	10	0	NA	10	DEG_GSE131565; DEG_GSE168797_Mock_CBD; DEG_GSE168797_SARS_CBD; DEG_GSE179661_MHCC97H; DEG_GSE201508_cGAMP; DEG_GSE235310_LPS; DEG_GSE235310_Veh; DEG_GSE272113_CBD; DEG_GSE272113_sCBD; DEG_GSE274859_LPS_24h
PALLD	10	8	DEG_GSE131565; DEG_GSE168797_Mock_CBD; DEG_GSE168797_SARS_CBD; DEG_GSE168797_SARS_CBDV; DEG_GSE179661_MHCC97H; DEG_GSE266113_WT; DEG_GSE272113_CBD; DEG_GSE272113_sCBD	2	DEG_GSE168797_Mock_CBDV; DEG_GSE179661_HepG2
PAPSS1	10	4	DEG_GSE131565; DEG_GSE168797_Mock_CBD; DEG_GSE179661_HepG2; DEG_GSE274859_LPS_24h	6	DEG_GSE151512_24h; DEG_GSE168797_SARS_CBD; DEG_GSE168797_SARS_CBDV; DEG_GSE235310_LPS; DEG_GSE272113_CBD; DEG_GSE272113_sCBD
PARP14	10	5	DEG_GSE131565; DEG_GSE152088; DEG_GSE179661_HepG2; DEG_GSE201508_cGAMP; DEG_GSE261716_CBD0.2_2d	5	DEG_GSE168797_Mock_CBD; DEG_GSE168797_SARS_CBD; DEG_GSE168797_SARS_CBDV; DEG_GSE179661_MHCC97H; DEG_GSE235310_Veh
PCOLCE	10	9	DEG_GSE131565; DEG_GSE151512_12h; DEG_GSE151512_24h; DEG_GSE151512_6h; DEG_GSE168797_Mock_CBD; DEG_GSE168797_SARS_CBD; DEG_GSE235310_Veh; DEG_GSE272113_CBD; DEG_GSE272113_sCBD	1	DEG_GSE232624_EtOH0.75_CBD0.75_6h
PCYT2	10	4	DEG_GSE131565; DEG_GSE168797_Mock_CBD; DEG_GSE179661_MHCC97H; DEG_GSE274859_LPS_24h	6	DEG_GSE151512_12h; DEG_GSE151512_24h; DEG_GSE151512_6h; DEG_GSE201508_enthanol; DEG_GSE272113_CBD; DEG_GSE272113_sCBD
PDE3B	10	6	DEG_GSE151512_6h; DEG_GSE168797_Mock_CBD; DEG_GSE168797_SARS_CBD; DEG_GSE179661_HepG2; DEG_GSE179661_MHCC97H; DEG_GSE272113_sCBD	4	DEG_GSE201508_cGAMP; DEG_GSE235310_LPS; DEG_GSE235310_Veh; DEG_GSE274859_LPS_24h
PDE4B	10	7	DEG_GSE131565; DEG_GSE168797_Mock_CBD; DEG_GSE168797_SARS_CBD; DEG_GSE168797_SARS_CBDV; DEG_GSE201508_cGAMP; DEG_GSE261716_CBD0.2_28d; DEG_GSE274859_LPS_24h	3	DEG_GSE151512_24h; DEG_GSE272113_CBD; DEG_GSE272113_sCBD
PDE7A	10	6	DEG_GSE151512_12h; DEG_GSE151512_24h; DEG_GSE168797_Mock_CBD; DEG_GSE168797_SARS_CBD; DEG_GSE179661_HepG2; DEG_GSE179661_MHCC97H	4	DEG_GSE131565; DEG_GSE201508_cGAMP; DEG_GSE201508_enthanol; DEG_GSE235310_Veh
PDE8A	10	6	DEG_GSE131565; DEG_GSE168797_Mock_CBD; DEG_GSE168797_SARS_CBD; DEG_GSE168797_SARS_CBDV; DEG_GSE201508_enthanol; DEG_GSE232624_EtOH0.25_CBD0.75_12h	4	DEG_GSE151512_6h; DEG_GSE168797_Mock_CBDV; DEG_GSE235310_LPS; DEG_GSE235310_Veh
PDP2	10	5	DEG_GSE152088; DEG_GSE168797_SARS_CBDV; DEG_GSE179661_HepG2; DEG_GSE179661_MHCC97H; DEG_GSE274859_LPS_24h	5	DEG_GSE151512_24h; DEG_GSE168797_Mock_CBD; DEG_GSE261716_CBD20_2d; DEG_GSE272113_CBD; DEG_GSE272113_sCBD
PEPD	10	5	DEG_GSE131565; DEG_GSE179661_HepG2; DEG_GSE179661_MHCC97H; DEG_GSE272113_CBD; DEG_GSE272113_sCBD	5	DEG_GSE168797_Mock_CBD; DEG_GSE168797_SARS_CBD; DEG_GSE168797_SARS_CBDV; DEG_GSE235310_LPS; DEG_GSE274859_LPS_24h
PER2	10	4	DEG_GSE168797_Mock_CBD; DEG_GSE168797_SARS_CBD; DEG_GSE168797_SARS_CBDV; DEG_GSE272113_sCBD	6	DEG_GSE151512_12h; DEG_GSE151512_24h; DEG_GSE168797_Mock_CBDV; DEG_GSE179661_HepG2; DEG_GSE235310_LPS; DEG_GSE261716_CBD20_28d
PEX19	10	5	DEG_GSE131565; DEG_GSE179661_HepG2; DEG_GSE179661_MHCC97H; DEG_GSE272113_CBD; DEG_GSE272113_sCBD	5	DEG_GSE152088; DEG_GSE235310_LPS; DEG_GSE235310_Veh; DEG_GSE261716_CBD0.2_28d; DEG_GSE261716_CBD10_28d
PFAS	10	8	DEG_GSE131565; DEG_GSE151512_24h; DEG_GSE151512_6h; DEG_GSE168797_Mock_CBD; DEG_GSE168797_SARS_CBD; DEG_GSE179661_MHCC97H; DEG_GSE261716_CBD20_28d; DEG_GSE274859_LPS_24h	2	DEG_GSE272113_CBD; DEG_GSE272113_sCBD
PGM3	10	0	NA	10	DEG_GSE131565; DEG_GSE168797_Mock_CBD; DEG_GSE168797_SARS_CBD; DEG_GSE179661_HepG2; DEG_GSE179661_MHCC97H; DEG_GSE201508_enthanol; DEG_GSE235310_LPS; DEG_GSE261716_CBD0.2_28d; DEG_GSE261716_CBD20_28d; DEG_GSE274859_LPS_24h
PHC2	10	5	DEG_GSE131565; DEG_GSE151512_12h; DEG_GSE151512_24h; DEG_GSE151512_6h; DEG_GSE168797_SARS_CBDV	5	DEG_GSE168797_Mock_CBD; DEG_GSE179661_HepG2; DEG_GSE179661_MHCC97H; DEG_GSE235310_LPS; DEG_GSE235310_Veh
PHF10	10	5	DEG_GSE151512_12h; DEG_GSE151512_24h; DEG_GSE168797_Mock_CBD; DEG_GSE168797_SARS_CBD; DEG_GSE179661_HepG2	5	DEG_GSE131565; DEG_GSE235310_LPS; DEG_GSE274859_LPS_24h; GSE70689_CBD_NoLPS; GSE70689_CBD_wLPS
PHF19	10	9	DEG_GSE131565; DEG_GSE151512_12h; DEG_GSE151512_24h; DEG_GSE151512_6h; DEG_GSE168797_Mock_CBD; DEG_GSE168797_SARS_CBD; DEG_GSE179661_MHCC97H; DEG_GSE201508_cGAMP; DEG_GSE274859_LPS_24h	1	DEG_GSE235310_LPS
PIP4P1	10	0	NA	10	DEG_GSE131565; DEG_GSE151512_12h; DEG_GSE151512_24h; DEG_GSE151512_6h; DEG_GSE168797_Mock_CBD; DEG_GSE168797_SARS_CBD; DEG_GSE179661_HepG2; DEG_GSE179661_MHCC97H; DEG_GSE272113_CBD; DEG_GSE272113_sCBD
PIP4P2	10	4	DEG_GSE168797_Mock_CBDV; DEG_GSE235310_Veh; DEG_GSE272113_CBD; DEG_GSE272113_sCBD	6	DEG_GSE131565; DEG_GSE151512_12h; DEG_GSE151512_24h; DEG_GSE168797_Mock_CBD; DEG_GSE179661_HepG2; DEG_GSE235310_LPS
PKM	10	7	DEG_GSE131565; DEG_GSE151512_24h; DEG_GSE168797_Mock_CBD; DEG_GSE179661_HepG2; DEG_GSE179661_MHCC97H; DEG_GSE232624_Veh_CBD3_6h; DEG_GSE274859_LPS_24h	3	DEG_GSE235310_LPS; DEG_GSE272113_CBD; DEG_GSE272113_sCBD
PKN1	10	4	DEG_GSE168797_Mock_CBD; DEG_GSE168797_Mock_CBDV; DEG_GSE168797_SARS_CBD; DEG_GSE261716_CBD20_28d	6	DEG_GSE131565; DEG_GSE179661_HepG2; DEG_GSE179661_MHCC97H; DEG_GSE235310_Veh; DEG_GSE272113_CBD; DEG_GSE272113_sCBD
PLEKHB2	10	3	DEG_GSE151512_12h; DEG_GSE151512_24h; DEG_GSE151512_6h	7	DEG_GSE131565; DEG_GSE168797_Mock_CBD; DEG_GSE168797_SARS_CBD; DEG_GSE201508_cGAMP; DEG_GSE235310_LPS; DEG_GSE272113_CBD; DEG_GSE274859_LPS_24h
PLOD1	10	7	DEG_GSE131565; DEG_GSE151512_12h; DEG_GSE151512_24h; DEG_GSE151512_6h; DEG_GSE168797_Mock_CBD; DEG_GSE179661_MHCC97H; DEG_GSE274859_LPS_24h	3	DEG_GSE235310_LPS; DEG_GSE272113_CBD; DEG_GSE272113_sCBD
PLXNA2	10	5	DEG_GSE179661_MHCC97H; DEG_GSE261716_CBD10_28d; DEG_GSE261716_CBD20_28d; DEG_GSE272113_CBD; DEG_GSE272113_sCBD	5	DEG_GSE131565; DEG_GSE151512_24h; DEG_GSE168797_Mock_CBDV; DEG_GSE235310_LPS; DEG_GSE235310_Veh
PLXNB1	10	8	DEG_GSE131565; DEG_GSE168797_Mock_CBD; DEG_GSE168797_SARS_CBD; DEG_GSE168797_SARS_CBDV; DEG_GSE179661_MHCC97H; DEG_GSE261716_CBD0.2_28d; DEG_GSE261716_CBD20_28d; DEG_GSE272113_sCBD	2	DEG_GSE168797_Mock_CBDV; DEG_GSE235310_LPS
PLXNC1	10	7	DEG_GSE131565; DEG_GSE151512_12h; DEG_GSE151512_24h; DEG_GSE151512_6h; DEG_GSE179661_HepG2; DEG_GSE201508_cGAMP; DEG_GSE235310_LPS	3	DEG_GSE168797_SARS_CBD; DEG_GSE235310_Veh; DEG_GSE274859_LPS_24h
PNN	10	9	DEG_GSE131565; DEG_GSE152088; DEG_GSE168797_Mock_CBD; DEG_GSE179661_HepG2; DEG_GSE179661_MHCC97H; DEG_GSE201508_enthanol; DEG_GSE235310_Veh; DEG_GSE261716_CBD10_28d; DEG_GSE274859_LPS_24h	1	DEG_GSE272113_CBD
POLD3	10	7	DEG_GSE131565; DEG_GSE151512_12h; DEG_GSE151512_24h; DEG_GSE168797_Mock_CBD; DEG_GSE168797_SARS_CBD; DEG_GSE179661_HepG2; DEG_GSE179661_MHCC97H	3	DEG_GSE168797_Mock_CBDV; DEG_GSE235310_LPS; DEG_GSE266113_WT
PPARD	10	3	DEG_GSE261716_CBD0.2_2d; DEG_GSE275998_CDB10; DEG_GSE275998_CDB20	7	DEG_GSE131565; DEG_GSE151512_12h; DEG_GSE151512_24h; DEG_GSE179661_HepG2; DEG_GSE235310_LPS; DEG_GSE272113_CBD; DEG_GSE272113_sCBD
PPFIBP2	10	4	DEG_GSE179661_HepG2; DEG_GSE179661_MHCC97H; DEG_GSE261716_CBD20_28d; DEG_GSE266113_WT	6	DEG_GSE131565; DEG_GSE151512_12h; DEG_GSE151512_24h; DEG_GSE235310_LPS; DEG_GSE274435_DMSO_24h; DEG_GSE274435_EtOH_24h
PPIB	10	1	DEG_GSE151512_24h	9	DEG_GSE131565; DEG_GSE168797_Mock_CBD; DEG_GSE168797_SARS_CBD; DEG_GSE179661_HepG2; DEG_GSE179661_MHCC97H; DEG_GSE201508_cGAMP; DEG_GSE232624_EtOH0.75_CBD0.75_6h; DEG_GSE272113_sCBD; DEG_GSE274859_LPS_24h
PPP1R15B	10	1	DEG_GSE168797_SARS_CBDV	9	DEG_GSE131565; DEG_GSE151512_12h; DEG_GSE151512_24h; DEG_GSE168797_Mock_CBD; DEG_GSE179661_HepG2; DEG_GSE179661_MHCC97H; DEG_GSE235310_Veh; DEG_GSE272113_CBD; DEG_GSE272113_sCBD
PRKCA	10	5	DEG_GSE131565; DEG_GSE168797_Mock_CBD; DEG_GSE168797_Mock_CBDV; DEG_GSE179661_MHCC97H; DEG_GSE274859_LPS_24h	5	DEG_GSE151512_12h; DEG_GSE151512_24h; DEG_GSE151512_6h; DEG_GSE168797_SARS_CBDV; DEG_GSE235310_Veh
PRKCSH	10	4	DEG_GSE131565; DEG_GSE151512_6h; DEG_GSE168797_Mock_CBD; DEG_GSE179661_MHCC97H	6	DEG_GSE179661_HepG2; DEG_GSE235310_LPS; DEG_GSE235310_Veh; DEG_GSE272113_CBD; DEG_GSE272113_sCBD; DEG_GSE274859_LPS_24h
PRMT1	10	8	DEG_GSE131565; DEG_GSE168797_Mock_CBD; DEG_GSE168797_SARS_CBD; DEG_GSE232624_Veh_CBD0.75_12h; DEG_GSE232624_Veh_CBD3_12h; DEG_GSE232624_Veh_CBD3_6h; DEG_GSE235310_LPS; DEG_GSE274859_LPS_24h	2	DEG_GSE179661_HepG2; DEG_GSE274435_DMSO_24h
PRPH	10	2	DEG_GSE168797_SARS_CBDV; DEG_GSE235310_LPS	8	DEG_GSE131565; DEG_GSE151512_12h; DEG_GSE151512_24h; DEG_GSE168797_Mock_CBD; DEG_GSE168797_SARS_CBD; DEG_GSE179661_HepG2; DEG_GSE179661_MHCC97H; DEG_GSE274859_LPS_24h
PRRC1	10	0	NA	10	DEG_GSE131565; DEG_GSE151512_12h; DEG_GSE168797_Mock_CBD; DEG_GSE168797_SARS_CBD; DEG_GSE179661_HepG2; DEG_GSE179661_MHCC97H; DEG_GSE201508_cGAMP; DEG_GSE201508_enthanol; DEG_GSE235310_LPS; DEG_GSE274859_LPS_24h
PSMA7	10	3	DEG_GSE131565; DEG_GSE151512_24h; DEG_GSE274859_LPS_24h	7	DEG_GSE168797_SARS_CBD; DEG_GSE179661_HepG2; DEG_GSE235310_LPS; DEG_GSE235310_Veh; DEG_GSE261716_CBD0.2_2d; DEG_GSE261716_CBD20_28d; DEG_GSE261716_CBD20_2d
PTCH1	10	5	DEG_GSE131565; DEG_GSE152088; DEG_GSE179661_MHCC97H; DEG_GSE235310_Veh; DEG_GSE266113_WT	5	DEG_GSE151512_6h; DEG_GSE168797_Mock_CBD; DEG_GSE201508_cGAMP; DEG_GSE272113_CBD; DEG_GSE272113_sCBD
PTGS2	10	3	DEG_GSE168797_SARS_CBDV; DEG_GSE274435_DMSO_24h; DEG_GSE274859_LPS_24h	7	DEG_GSE168797_Mock_CBD; DEG_GSE168797_Mock_CBDV; DEG_GSE179661_MHCC97H; DEG_GSE232624_EtOH0.75_CBD0.75_6h; DEG_GSE235310_LPS; DEG_GSE272113_CBD; DEG_GSE272113_sCBD
PTOV1	10	6	DEG_GSE151512_24h; DEG_GSE168797_Mock_CBD; DEG_GSE168797_SARS_CBD; DEG_GSE261716_CBD20_28d; DEG_GSE272113_CBD; DEG_GSE272113_sCBD	4	DEG_GSE131565; DEG_GSE179661_HepG2; DEG_GSE179661_MHCC97H; DEG_GSE261716_CBD0.2_2d
PTTG1IP	10	4	DEG_GSE151512_12h; DEG_GSE151512_24h; DEG_GSE168797_Mock_CBD; DEG_GSE201508_cGAMP	6	DEG_GSE131565; DEG_GSE179661_MHCC97H; DEG_GSE235310_LPS; DEG_GSE272113_CBD; DEG_GSE272113_sCBD; DEG_GSE274859_LPS_24h
PXYLP1	10	10	DEG_GSE151512_12h; DEG_GSE151512_24h; DEG_GSE168797_Mock_CBD; DEG_GSE179661_HepG2; DEG_GSE235310_LPS; DEG_GSE235310_Veh; DEG_GSE261716_CBD0.2_2d; DEG_GSE261716_CBD20_2d; DEG_GSE272113_CBD; DEG_GSE272113_sCBD	0	NA
QPCT	10	1	DEG_GSE168797_Mock_CBDV	9	DEG_GSE131565; DEG_GSE151512_24h; DEG_GSE168797_Mock_CBD; DEG_GSE168797_SARS_CBD; DEG_GSE168797_SARS_CBDV; DEG_GSE235310_LPS; DEG_GSE261716_CBD20_28d; DEG_GSE261716_CBD20_2d; DEG_GSE274859_LPS_24h
RAB15	10	9	DEG_GSE151512_12h; DEG_GSE151512_24h; DEG_GSE168797_Mock_CBD; DEG_GSE168797_SARS_CBD; DEG_GSE179661_HepG2; DEG_GSE179661_MHCC97H; DEG_GSE201508_cGAMP; DEG_GSE235310_LPS; DEG_GSE235310_Veh	1	DEG_GSE274859_LPS_24h
RAB31	10	2	DEG_GSE235310_Veh; DEG_GSE274859_LPS_24h	8	DEG_GSE131565; DEG_GSE151512_24h; DEG_GSE168797_Mock_CBD; DEG_GSE168797_SARS_CBD; DEG_GSE168797_SARS_CBDV; DEG_GSE201508_cGAMP; DEG_GSE272113_CBD; DEG_GSE272113_sCBD
RAI14	10	4	DEG_GSE131565; DEG_GSE168797_Mock_CBDV; DEG_GSE261716_CBD10_28d; DEG_GSE274859_LPS_24h	6	DEG_GSE151512_24h; DEG_GSE168797_Mock_CBD; DEG_GSE201508_cGAMP; DEG_GSE201508_enthanol; DEG_GSE272113_CBD; DEG_GSE272113_sCBD
RALGDS	10	6	DEG_GSE151512_12h; DEG_GSE151512_24h; DEG_GSE201508_enthanol; DEG_GSE261716_CBD0.2_2d; DEG_GSE272113_CBD; DEG_GSE272113_sCBD	4	DEG_GSE179661_HepG2; DEG_GSE179661_MHCC97H; DEG_GSE235310_LPS; DEG_GSE274859_LPS_24h
RANGAP1	10	7	DEG_GSE151512_12h; DEG_GSE151512_24h; DEG_GSE151512_6h; DEG_GSE201508_cGAMP; DEG_GSE235310_LPS; DEG_GSE261716_CBD20_28d; DEG_GSE274859_LPS_24h	3	DEG_GSE179661_HepG2; DEG_GSE179661_MHCC97H; DEG_GSE272113_CBD
RASSF2	10	9	DEG_GSE151512_12h; DEG_GSE151512_24h; DEG_GSE168797_Mock_CBD; DEG_GSE168797_SARS_CBD; DEG_GSE201508_cGAMP; DEG_GSE201508_enthanol; DEG_GSE235310_LPS; DEG_GSE235310_Veh; DEG_GSE274859_LPS_24h	1	DEG_GSE179661_MHCC97H
RBL1	10	6	DEG_GSE131565; DEG_GSE168797_Mock_CBD; DEG_GSE168797_SARS_CBD; DEG_GSE179661_HepG2; DEG_GSE179661_MHCC97H; DEG_GSE274859_LPS_24h	4	DEG_GSE201508_enthanol; DEG_GSE235310_Veh; DEG_GSE266113_WT; DEG_GSE272113_CBD
RBM12	10	10	DEG_GSE131565; DEG_GSE151512_12h; DEG_GSE151512_24h; DEG_GSE151512_6h; DEG_GSE168797_Mock_CBD; DEG_GSE168797_SARS_CBD; DEG_GSE179661_HepG2; DEG_GSE179661_MHCC97H; DEG_GSE201508_cGAMP; DEG_GSE274859_LPS_24h	0	NA
RBM14	10	10	DEG_GSE131565; DEG_GSE151512_12h; DEG_GSE151512_24h; DEG_GSE151512_6h; DEG_GSE168797_Mock_CBD; DEG_GSE168797_SARS_CBD; DEG_GSE179661_MHCC97H; DEG_GSE201508_cGAMP; DEG_GSE235310_LPS; DEG_GSE274859_LPS_24h	0	NA
RDH11	10	3	DEG_GSE131565; DEG_GSE179661_MHCC97H; DEG_GSE274859_LPS_24h	7	DEG_GSE151512_12h; DEG_GSE151512_24h; DEG_GSE201508_cGAMP; DEG_GSE235310_LPS; DEG_GSE235310_Veh; DEG_GSE272113_CBD; DEG_GSE272113_sCBD
REPS2	10	3	DEG_GSE168797_Mock_CBDV; DEG_GSE235310_LPS; DEG_GSE235310_Veh	7	DEG_GSE131565; DEG_GSE151512_24h; DEG_GSE168797_Mock_CBD; DEG_GSE168797_SARS_CBD; DEG_GSE179661_MHCC97H; DEG_GSE272113_CBD; DEG_GSE274859_LPS_24h
RGS4	10	7	DEG_GSE131565; DEG_GSE151512_12h; DEG_GSE151512_24h; DEG_GSE151512_3h; DEG_GSE151512_6h; DEG_GSE274435_DMSO_24h; DEG_GSE274435_EtOH_24h	3	DEG_GSE168797_SARS_CBD; DEG_GSE270378_CBD0.75_24h; DEG_GSE270378_CBD1.5_24h
RHEBL1	10	2	DEG_GSE235310_LPS; DEG_GSE274859_LPS_24h	8	DEG_GSE151512_12h; DEG_GSE151512_24h; DEG_GSE151512_6h; DEG_GSE168797_Mock_CBD; DEG_GSE168797_SARS_CBD; DEG_GSE179661_MHCC97H; DEG_GSE235310_Veh; DEG_GSE272113_sCBD
RHOF	10	4	DEG_GSE151512_6h; DEG_GSE168797_Mock_CBDV; DEG_GSE235310_LPS; DEG_GSE274859_LPS_24h	6	DEG_GSE131565; DEG_GSE152088; DEG_GSE168797_Mock_CBD; DEG_GSE168797_SARS_CBD; DEG_GSE179661_HepG2; DEG_GSE179661_MHCC97H
RHOV	10	3	DEG_GSE168797_Mock_CBD; DEG_GSE235310_LPS; DEG_GSE235310_Veh	7	DEG_GSE131565; DEG_GSE168797_Mock_CBDV; DEG_GSE179661_HepG2; DEG_GSE179661_MHCC97H; DEG_GSE272113_CBD; DEG_GSE272113_sCBD; DEG_GSE274859_LPS_24h
RNASE4	10	2	DEG_GSE179661_HepG2; DEG_GSE274859_LPS_24h	8	DEG_GSE131565; DEG_GSE168797_Mock_CBDV; DEG_GSE168797_SARS_CBD; DEG_GSE179661_MHCC97H; DEG_GSE261716_CBD20_28d; DEG_GSE261716_CBD20_2d; DEG_GSE272113_sCBD; DEG_GSE274435_EtOH_24h
RNF122	10	5	DEG_GSE151512_12h; DEG_GSE151512_24h; DEG_GSE151512_6h; DEG_GSE272113_CBD; DEG_GSE272113_sCBD	5	DEG_GSE168797_SARS_CBD; DEG_GSE179661_HepG2; DEG_GSE201508_enthanol; DEG_GSE235310_LPS; DEG_GSE235310_Veh
RNF149	10	1	DEG_GSE168797_Mock_CBDV	9	DEG_GSE131565; DEG_GSE151512_24h; DEG_GSE168797_Mock_CBD; DEG_GSE168797_SARS_CBD; DEG_GSE201508_cGAMP; DEG_GSE235310_LPS; DEG_GSE272113_CBD; DEG_GSE272113_sCBD; DEG_GSE274859_LPS_24h
ROR1	10	7	DEG_GSE131565; DEG_GSE168797_Mock_CBD; DEG_GSE168797_SARS_CBD; DEG_GSE179661_HepG2; DEG_GSE179661_MHCC97H; DEG_GSE272113_CBD; DEG_GSE272113_sCBD	3	DEG_GSE151512_24h; DEG_GSE235310_LPS; DEG_GSE235310_Veh
RPA1	10	8	DEG_GSE131565; DEG_GSE151512_24h; DEG_GSE168797_Mock_CBD; DEG_GSE168797_SARS_CBD; DEG_GSE179661_HepG2; DEG_GSE179661_MHCC97H; DEG_GSE235310_LPS; DEG_GSE274859_LPS_24h	2	DEG_GSE266113_WT; DEG_GSE272113_CBD
RPL12	10	1	DEG_GSE235310_LPS	9	DEG_GSE151512_12h; DEG_GSE151512_24h; DEG_GSE151512_3h; DEG_GSE168797_SARS_CBD; DEG_GSE179661_HepG2; DEG_GSE179661_MHCC97H; DEG_GSE261716_CBD20_28d; DEG_GSE261716_CBD20_2d; DEG_GSE272113_sCBD
RPL28	10	1	DEG_GSE274859_LPS_24h	9	DEG_GSE131565; DEG_GSE152088; DEG_GSE179661_HepG2; DEG_GSE179661_MHCC97H; DEG_GSE235310_Veh; DEG_GSE261716_CBD0.2_2d; DEG_GSE270378_CBD0.325_6h; DEG_GSE270378_CBD0.75_6h; DEG_GSE270378_CBD3_6h
RRAGA	10	1	DEG_GSE151512_24h	9	DEG_GSE131565; DEG_GSE168797_Mock_CBD; DEG_GSE168797_SARS_CBD; DEG_GSE168797_SARS_CBDV; DEG_GSE179661_MHCC97H; DEG_GSE201508_cGAMP; DEG_GSE201508_enthanol; DEG_GSE270378_CBD0.75_24h; DEG_GSE274859_LPS_24h
RSRP1	10	5	DEG_GSE151512_24h; DEG_GSE151512_6h; DEG_GSE168797_SARS_CBDV; DEG_GSE235310_LPS; DEG_GSE261716_CBD0.2_28d	5	DEG_GSE131565; DEG_GSE179661_MHCC97H; DEG_GSE201508_cGAMP; DEG_GSE272113_sCBD; DEG_GSE274859_LPS_24h
RSU1	10	7	DEG_GSE131565; DEG_GSE168797_Mock_CBD; DEG_GSE179661_HepG2; DEG_GSE235310_LPS; DEG_GSE235310_Veh; DEG_GSE266113_WT; DEG_GSE272113_CBD	3	DEG_GSE151512_24h; DEG_GSE179661_MHCC97H; DEG_GSE261716_CBD20_2d
RTN4	10	0	NA	10	DEG_GSE131565; DEG_GSE168797_Mock_CBD; DEG_GSE168797_SARS_CBD; DEG_GSE179661_HepG2; DEG_GSE179661_MHCC97H; DEG_GSE201508_cGAMP; DEG_GSE201508_enthanol; DEG_GSE235310_LPS; DEG_GSE235310_Veh; DEG_GSE261716_CBD20_2d
SAFB	10	7	DEG_GSE151512_12h; DEG_GSE151512_24h; DEG_GSE151512_3h; DEG_GSE151512_6h; DEG_GSE168797_Mock_CBD; DEG_GSE168797_SARS_CBD; DEG_GSE274859_LPS_24h	3	DEG_GSE179661_HepG2; DEG_GSE179661_MHCC97H; DEG_GSE235310_LPS
SAPCD2	10	10	DEG_GSE131565; DEG_GSE151512_12h; DEG_GSE151512_24h; DEG_GSE168797_Mock_CBD; DEG_GSE168797_SARS_CBD; DEG_GSE179661_MHCC97H; DEG_GSE201508_cGAMP; DEG_GSE201508_enthanol; DEG_GSE235310_Veh; DEG_GSE274859_LPS_24h	0	NA
SARS1	10	0	NA	10	DEG_GSE131565; DEG_GSE151512_12h; DEG_GSE151512_24h; DEG_GSE151512_3h; DEG_GSE151512_6h; DEG_GSE168797_Mock_CBD; DEG_GSE168797_SARS_CBD; DEG_GSE179661_HepG2; DEG_GSE179661_MHCC97H; DEG_GSE235310_Veh
SBK1	10	7	DEG_GSE151512_12h; DEG_GSE151512_24h; DEG_GSE151512_6h; DEG_GSE168797_Mock_CBD; DEG_GSE272113_CBD; DEG_GSE272113_sCBD; DEG_GSE274859_LPS_24h	3	DEG_GSE235310_Veh; DEG_GSE261716_CBD10_28d; DEG_GSE261716_CBD20_28d
SC5D	10	1	DEG_GSE235310_LPS	9	DEG_GSE131565; DEG_GSE151512_12h; DEG_GSE168797_Mock_CBD; DEG_GSE168797_Mock_CBDV; DEG_GSE168797_SARS_CBD; DEG_GSE201508_cGAMP; DEG_GSE201508_enthanol; DEG_GSE272113_CBD; DEG_GSE272113_sCBD
SCPEP1	10	2	DEG_GSE131565; DEG_GSE179661_MHCC97H	8	DEG_GSE152088; DEG_GSE168797_Mock_CBD; DEG_GSE168797_SARS_CBD; DEG_GSE272113_CBD; DEG_GSE272113_sCBD; DEG_GSE274435_DMSO_24h; DEG_GSE274435_EtOH_24h; DEG_GSE274859_LPS_24h
SELENOK	10	0	NA	10	DEG_GSE131565; DEG_GSE168797_Mock_CBD; DEG_GSE168797_SARS_CBD; DEG_GSE179661_HepG2; DEG_GSE179661_MHCC97H; DEG_GSE201508_cGAMP; DEG_GSE201508_enthanol; DEG_GSE235310_LPS; DEG_GSE272113_sCBD; DEG_GSE274859_LPS_24h
SELENOW	10	4	DEG_GSE131565; DEG_GSE201508_cGAMP; DEG_GSE235310_LPS; DEG_GSE235310_Veh	6	DEG_GSE152088; DEG_GSE168797_SARS_CBD; DEG_GSE179661_HepG2; DEG_GSE179661_MHCC97H; DEG_GSE261716_CBD0.2_2d; DEG_GSE274859_LPS_24h
SEMA3A	10	9	DEG_GSE151512_12h; DEG_GSE151512_24h; DEG_GSE168797_Mock_CBD; DEG_GSE168797_SARS_CBD; DEG_GSE179661_HepG2; DEG_GSE179661_MHCC97H; DEG_GSE232624_EtOH0.25_CBD0.75_12h; DEG_GSE272113_CBD; DEG_GSE272113_sCBD	1	DEG_GSE131565
SERINC5	10	1	DEG_GSE179661_MHCC97H	9	DEG_GSE131565; DEG_GSE151512_12h; DEG_GSE151512_24h; DEG_GSE168797_Mock_CBD; DEG_GSE168797_SARS_CBD; DEG_GSE168797_SARS_CBDV; DEG_GSE201508_cGAMP; DEG_GSE201508_enthanol; DEG_GSE235310_Veh
SERPINE2	10	7	DEG_GSE131565; DEG_GSE151512_12h; DEG_GSE168797_Mock_CBDV; DEG_GSE179661_MHCC97H; DEG_GSE261716_CBD0.2_2d; DEG_GSE261716_CBD10_2d; DEG_GSE261716_CBD20_2d	3	DEG_GSE168797_Mock_CBD; DEG_GSE179661_HepG2; DEG_GSE235310_Veh
SETX	10	5	DEG_GSE151512_24h; DEG_GSE168797_SARS_CBD; DEG_GSE168797_SARS_CBDV; DEG_GSE235310_Veh; DEG_GSE274859_LPS_24h	5	DEG_GSE131565; DEG_GSE168797_Mock_CBD; DEG_GSE179661_HepG2; DEG_GSE179661_MHCC97H; DEG_GSE201508_cGAMP
SH2B3	10	5	DEG_GSE131565; DEG_GSE168797_Mock_CBDV; DEG_GSE235310_LPS; DEG_GSE272113_sCBD; DEG_GSE274859_LPS_24h	5	DEG_GSE151512_12h; DEG_GSE151512_24h; DEG_GSE151512_6h; DEG_GSE168797_Mock_CBD; DEG_GSE179661_HepG2
SH3BGRL	10	7	DEG_GSE131565; DEG_GSE168797_Mock_CBD; DEG_GSE168797_SARS_CBD; DEG_GSE179661_HepG2; DEG_GSE179661_MHCC97H; DEG_GSE272113_CBD; DEG_GSE272113_sCBD	3	DEG_GSE168797_SARS_CBDV; DEG_GSE201508_cGAMP; DEG_GSE274859_LPS_24h
SH3BP5L	10	3	DEG_GSE151512_12h; DEG_GSE151512_24h; DEG_GSE151512_6h	7	DEG_GSE131565; DEG_GSE168797_Mock_CBD; DEG_GSE168797_SARS_CBD; DEG_GSE179661_HepG2; DEG_GSE179661_MHCC97H; DEG_GSE232624_EtOH0.75_CBD0.75_6h; DEG_GSE274859_LPS_24h
SIPA1L1	10	7	DEG_GSE151512_12h; DEG_GSE168797_Mock_CBD; DEG_GSE168797_SARS_CBD; DEG_GSE201508_cGAMP; DEG_GSE235310_Veh; DEG_GSE261716_CBD0.2_2d; DEG_GSE274435_DMSO_24h	3	DEG_GSE232624_EtOH0.75_CBD0.75_12h; DEG_GSE272113_CBD; DEG_GSE272113_sCBD
SLC12A9	10	6	DEG_GSE131565; DEG_GSE168797_Mock_CBD; DEG_GSE168797_SARS_CBD; DEG_GSE179661_MHCC97H; DEG_GSE235310_Veh; DEG_GSE261716_CBD20_28d	4	DEG_GSE152088; DEG_GSE179661_HepG2; DEG_GSE272113_CBD; DEG_GSE272113_sCBD
SLC16A13	10	3	DEG_GSE179661_HepG2; DEG_GSE179661_MHCC97H; DEG_GSE274859_LPS_24h	7	DEG_GSE131565; DEG_GSE168797_Mock_CBD; DEG_GSE168797_SARS_CBD; DEG_GSE168797_SARS_CBDV; DEG_GSE272113_CBD; DEG_GSE272113_sCBD; DEG_GSE274435_DMSO_4h
SLC23A2	10	3	DEG_GSE131565; DEG_GSE179661_HepG2; DEG_GSE179661_MHCC97H	7	DEG_GSE168797_SARS_CBD; DEG_GSE168797_SARS_CBDV; DEG_GSE201508_cGAMP; DEG_GSE235310_LPS; DEG_GSE235310_Veh; DEG_GSE272113_CBD; DEG_GSE272113_sCBD
SLC27A4	10	4	DEG_GSE168797_Mock_CBDV; DEG_GSE201508_cGAMP; DEG_GSE261716_CBD20_28d; DEG_GSE261716_CBD20_2d	6	DEG_GSE168797_Mock_CBD; DEG_GSE168797_SARS_CBD; DEG_GSE179661_HepG2; DEG_GSE179661_MHCC97H; DEG_GSE272113_CBD; DEG_GSE272113_sCBD
SLC35B1	10	0	NA	10	DEG_GSE131565; DEG_GSE168797_Mock_CBD; DEG_GSE168797_SARS_CBD; DEG_GSE179661_HepG2; DEG_GSE179661_MHCC97H; DEG_GSE201508_cGAMP; DEG_GSE235310_LPS; DEG_GSE272113_CBD; DEG_GSE272113_sCBD; DEG_GSE274859_LPS_24h
SLC37A2	10	4	DEG_GSE168797_SARS_CBD; DEG_GSE168797_SARS_CBDV; DEG_GSE272113_CBD; DEG_GSE272113_sCBD	6	DEG_GSE131565; DEG_GSE201508_cGAMP; DEG_GSE235310_LPS; DEG_GSE235310_Veh; DEG_GSE274435_DMSO_24h; DEG_GSE274859_LPS_24h
SLC38A1	10	2	DEG_GSE151512_24h; DEG_GSE235310_LPS	8	DEG_GSE131565; DEG_GSE168797_Mock_CBD; DEG_GSE168797_SARS_CBD; DEG_GSE179661_HepG2; DEG_GSE179661_MHCC97H; DEG_GSE201508_cGAMP; DEG_GSE272113_CBD; DEG_GSE272113_sCBD
SLC38A2	10	0	NA	10	DEG_GSE131565; DEG_GSE168797_Mock_CBD; DEG_GSE168797_SARS_CBD; DEG_GSE179661_MHCC97H; DEG_GSE201508_cGAMP; DEG_GSE235310_LPS; DEG_GSE235310_Veh; DEG_GSE272113_CBD; DEG_GSE272113_sCBD; DEG_GSE274859_LPS_24h
SLC4A7	10	8	DEG_GSE131565; DEG_GSE152088; DEG_GSE168797_Mock_CBD; DEG_GSE168797_SARS_CBD; DEG_GSE179661_MHCC97H; DEG_GSE235310_Veh; DEG_GSE272113_sCBD; DEG_GSE274859_LPS_24h	2	DEG_GSE151512_24h; DEG_GSE151512_6h
SLC5A6	10	9	DEG_GSE131565; DEG_GSE151512_6h; DEG_GSE168797_Mock_CBD; DEG_GSE168797_SARS_CBD; DEG_GSE179661_MHCC97H; DEG_GSE201508_cGAMP; DEG_GSE235310_LPS; DEG_GSE274859_LPS_24h; GSE70689_CBD_NoLPS	1	DEG_GSE272113_CBD
SLC6A6	10	4	DEG_GSE168797_Mock_CBDV; DEG_GSE179661_MHCC97H; DEG_GSE261716_CBD0.2_2d; DEG_GSE261716_CBD20_2d	6	DEG_GSE168797_Mock_CBD; DEG_GSE168797_SARS_CBD; DEG_GSE168797_SARS_CBDV; DEG_GSE179661_HepG2; DEG_GSE201508_cGAMP; DEG_GSE232624_EtOH0.75_CBD0.75_6h
SLC6A8	10	3	DEG_GSE151512_24h; DEG_GSE151512_6h; DEG_GSE168797_SARS_CBDV	7	DEG_GSE168797_SARS_CBD; DEG_GSE179661_HepG2; DEG_GSE179661_MHCC97H; DEG_GSE235310_Veh; DEG_GSE272113_CBD; DEG_GSE272113_sCBD; DEG_GSE274859_LPS_24h
SMAD2	10	4	DEG_GSE168797_Mock_CBD; DEG_GSE168797_SARS_CBD; DEG_GSE168797_SARS_CBDV; DEG_GSE232624_EtOH0.75_CBD0.75_6h	6	DEG_GSE131565; DEG_GSE151512_24h; DEG_GSE168797_Mock_CBDV; DEG_GSE179661_HepG2; DEG_GSE179661_MHCC97H; DEG_GSE235310_Veh
SMAD7	10	4	DEG_GSE168797_Mock_CBD; DEG_GSE168797_SARS_CBD; DEG_GSE261716_CBD20_28d; DEG_GSE274859_LPS_24h	6	DEG_GSE152088; DEG_GSE179661_HepG2; DEG_GSE179661_MHCC97H; DEG_GSE235310_LPS; DEG_GSE235310_Veh; DEG_GSE272113_CBD
SNX9	10	1	DEG_GSE274859_LPS_24h	9	DEG_GSE131565; DEG_GSE151512_12h; DEG_GSE151512_24h; DEG_GSE168797_Mock_CBD; DEG_GSE168797_SARS_CBD; DEG_GSE179661_HepG2; DEG_GSE179661_MHCC97H; DEG_GSE272113_CBD; DEG_GSE272113_sCBD
SOX12	10	6	DEG_GSE131565; DEG_GSE151512_6h; DEG_GSE168797_Mock_CBD; DEG_GSE168797_SARS_CBD; DEG_GSE261716_CBD0.2_28d; DEG_GSE261716_CBD20_2d	4	DEG_GSE152088; DEG_GSE179661_MHCC97H; DEG_GSE272113_CBD; DEG_GSE272113_sCBD
SPCS3	10	1	DEG_GSE168797_Mock_CBDV	9	DEG_GSE131565; DEG_GSE168797_Mock_CBD; DEG_GSE179661_HepG2; DEG_GSE179661_MHCC97H; DEG_GSE201508_cGAMP; DEG_GSE201508_enthanol; DEG_GSE235310_LPS; DEG_GSE272113_CBD; DEG_GSE272113_sCBD
SPRY4	10	3	DEG_GSE179661_MHCC97H; DEG_GSE232624_EtOH0.75_CBD0.75_12h; DEG_GSE274859_LPS_24h	7	DEG_GSE151512_12h; DEG_GSE151512_24h; DEG_GSE151512_3h; DEG_GSE151512_6h; DEG_GSE168797_Mock_CBD; DEG_GSE179661_HepG2; DEG_GSE232624_EtOH0.75_CBD0.75_6h
SPSB1	10	2	DEG_GSE151512_24h; DEG_GSE274859_LPS_24h	8	DEG_GSE131565; DEG_GSE152088; DEG_GSE179661_HepG2; DEG_GSE179661_MHCC97H; DEG_GSE235310_LPS; DEG_GSE235310_Veh; DEG_GSE272113_CBD; DEG_GSE272113_sCBD
SREBF1	10	7	DEG_GSE168797_Mock_CBD; DEG_GSE168797_Mock_CBDV; DEG_GSE168797_SARS_CBD; DEG_GSE179661_MHCC97H; DEG_GSE235310_LPS; DEG_GSE261716_CBD0.2_2d; DEG_GSE274859_LPS_24h	3	DEG_GSE151512_12h; DEG_GSE201508_cGAMP; DEG_GSE201508_enthanol
SRPRA	10	0	NA	10	DEG_GSE131565; DEG_GSE168797_Mock_CBD; DEG_GSE168797_SARS_CBD; DEG_GSE179661_HepG2; DEG_GSE179661_MHCC97H; DEG_GSE235310_LPS; DEG_GSE235310_Veh; DEG_GSE261716_CBD0.2_28d; DEG_GSE261716_CBD20_28d; DEG_GSE274859_LPS_24h
SRSF1	10	9	DEG_GSE131565; DEG_GSE151512_12h; DEG_GSE151512_24h; DEG_GSE151512_6h; DEG_GSE168797_Mock_CBD; DEG_GSE179661_HepG2; DEG_GSE179661_MHCC97H; DEG_GSE201508_cGAMP; DEG_GSE274859_LPS_24h	1	DEG_GSE232624_Veh_CBD3_12h
SSBP3	10	8	DEG_GSE131565; DEG_GSE151512_12h; DEG_GSE151512_24h; DEG_GSE168797_Mock_CBD; DEG_GSE261716_CBD20_28d; DEG_GSE261716_CBD20_2d; DEG_GSE272113_CBD; DEG_GSE272113_sCBD	2	DEG_GSE152088; DEG_GSE274859_LPS_24h
ST3GAL5	10	9	DEG_GSE131565; DEG_GSE168797_Mock_CBD; DEG_GSE168797_SARS_CBD; DEG_GSE179661_HepG2; DEG_GSE179661_MHCC97H; DEG_GSE235310_LPS; DEG_GSE272113_CBD; DEG_GSE272113_sCBD; DEG_GSE274859_LPS_24h	1	DEG_GSE261716_CBD0.2_28d
STX11	10	1	DEG_GSE168797_SARS_CBDV	9	DEG_GSE131565; DEG_GSE168797_Mock_CBD; DEG_GSE179661_HepG2; DEG_GSE235310_LPS; DEG_GSE235310_Veh; DEG_GSE272113_CBD; DEG_GSE272113_sCBD; DEG_GSE274859_LPS_24h; GSE70689_CBD_NoLPS
STX3	10	0	NA	10	DEG_GSE131565; DEG_GSE151512_24h; DEG_GSE168797_Mock_CBD; DEG_GSE179661_HepG2; DEG_GSE179661_MHCC97H; DEG_GSE235310_LPS; DEG_GSE235310_Veh; DEG_GSE272113_CBD; DEG_GSE272113_sCBD; DEG_GSE274859_LPS_24h
SUV39H1	10	8	DEG_GSE131565; DEG_GSE151512_6h; DEG_GSE168797_Mock_CBD; DEG_GSE168797_SARS_CBD; DEG_GSE179661_MHCC97H; DEG_GSE201508_cGAMP; DEG_GSE235310_LPS; DEG_GSE274859_LPS_24h	2	DEG_GSE272113_CBD; DEG_GSE272113_sCBD
SWAP70	10	2	DEG_GSE235310_LPS; DEG_GSE235310_Veh	8	DEG_GSE151512_12h; DEG_GSE151512_24h; DEG_GSE179661_HepG2; DEG_GSE179661_MHCC97H; DEG_GSE201508_cGAMP; DEG_GSE201508_enthanol; DEG_GSE272113_CBD; DEG_GSE272113_sCBD
SYNGR2	10	5	DEG_GSE168797_Mock_CBD; DEG_GSE201508_cGAMP; DEG_GSE235310_LPS; DEG_GSE235310_Veh; DEG_GSE274859_LPS_24h	5	DEG_GSE131565; DEG_GSE151512_24h; DEG_GSE179661_HepG2; DEG_GSE179661_MHCC97H; DEG_GSE272113_sCBD
TALDO1	10	3	DEG_GSE168797_Mock_CBD; DEG_GSE179661_MHCC97H; DEG_GSE261716_CBD20_28d	7	DEG_GSE131565; DEG_GSE201508_enthanol; DEG_GSE235310_LPS; DEG_GSE235310_Veh; DEG_GSE261716_CBD0.2_2d; DEG_GSE272113_CBD; DEG_GSE272113_sCBD
TBC1D15	10	0	NA	10	DEG_GSE131565; DEG_GSE151512_12h; DEG_GSE151512_24h; DEG_GSE151512_6h; DEG_GSE168797_Mock_CBD; DEG_GSE168797_SARS_CBD; DEG_GSE179661_HepG2; DEG_GSE179661_MHCC97H; DEG_GSE201508_cGAMP; DEG_GSE272113_CBD
TBC1D2B	10	6	DEG_GSE131565; DEG_GSE168797_Mock_CBD; DEG_GSE168797_SARS_CBD; DEG_GSE179661_HepG2; DEG_GSE179661_MHCC97H; DEG_GSE274859_LPS_24h	4	DEG_GSE151512_12h; DEG_GSE235310_LPS; DEG_GSE272113_CBD; DEG_GSE272113_sCBD
TBL2	10	2	DEG_GSE168797_Mock_CBDV; DEG_GSE274859_LPS_24h	8	DEG_GSE131565; DEG_GSE168797_Mock_CBD; DEG_GSE168797_SARS_CBD; DEG_GSE179661_MHCC97H; DEG_GSE235310_LPS; DEG_GSE235310_Veh; DEG_GSE272113_CBD; DEG_GSE272113_sCBD
TCEAL9	10	1	DEG_GSE261716_CBD0.2_28d	9	DEG_GSE131565; DEG_GSE151512_6h; DEG_GSE168797_Mock_CBD; DEG_GSE168797_SARS_CBD; DEG_GSE179661_MHCC97H; DEG_GSE201508_cGAMP; DEG_GSE201508_enthanol; DEG_GSE235310_LPS; DEG_GSE235310_Veh
TCOF1	10	6	DEG_GSE131565; DEG_GSE168797_Mock_CBD; DEG_GSE168797_Mock_CBDV; DEG_GSE168797_SARS_CBD; DEG_GSE179661_MHCC97H; DEG_GSE261716_CBD20_28d	4	DEG_GSE235310_LPS; DEG_GSE266113_WT; DEG_GSE272113_CBD; DEG_GSE272113_sCBD
TET2	10	6	DEG_GSE151512_24h; DEG_GSE168797_SARS_CBD; DEG_GSE168797_SARS_CBDV; DEG_GSE235310_Veh; DEG_GSE266113_WT; DEG_GSE274859_LPS_24h	4	DEG_GSE131565; DEG_GSE201508_cGAMP; DEG_GSE232624_EtOH0.75_CBD0.75_6h; DEG_GSE235310_LPS
TFEB	10	5	DEG_GSE131565; DEG_GSE168797_Mock_CBD; DEG_GSE201508_cGAMP; DEG_GSE272113_CBD; DEG_GSE274859_LPS_24h	5	DEG_GSE151512_24h; DEG_GSE179661_HepG2; DEG_GSE179661_MHCC97H; DEG_GSE235310_LPS; DEG_GSE235310_Veh
TGFBI	10	7	DEG_GSE131565; DEG_GSE168797_Mock_CBD; DEG_GSE179661_MHCC97H; DEG_GSE201508_cGAMP; DEG_GSE201508_enthanol; DEG_GSE235310_Veh; DEG_GSE274859_LPS_24h	3	DEG_GSE151512_12h; DEG_GSE151512_24h; DEG_GSE235310_LPS
TGFBR1	10	4	DEG_GSE131565; DEG_GSE151512_12h; DEG_GSE151512_24h; DEG_GSE235310_LPS	6	DEG_GSE179661_MHCC97H; DEG_GSE201508_cGAMP; DEG_GSE201508_enthanol; DEG_GSE272113_CBD; DEG_GSE272113_sCBD; DEG_GSE274859_LPS_24h
TIMP3	10	7	DEG_GSE131565; DEG_GSE151512_12h; DEG_GSE201508_cGAMP; DEG_GSE201508_enthanol; DEG_GSE261716_CBD0.2_2d; DEG_GSE272113_CBD; DEG_GSE272113_sCBD	3	DEG_GSE168797_SARS_CBD; DEG_GSE235310_LPS; DEG_GSE274435_EtOH_24h
TMED10	10	0	NA	10	DEG_GSE131565; DEG_GSE168797_Mock_CBD; DEG_GSE168797_SARS_CBD; DEG_GSE179661_HepG2; DEG_GSE179661_MHCC97H; DEG_GSE201508_cGAMP; DEG_GSE201508_enthanol; DEG_GSE235310_LPS; DEG_GSE235310_Veh; DEG_GSE272113_sCBD
TMEM104	10	1	DEG_GSE179661_MHCC97H	9	DEG_GSE151512_6h; DEG_GSE168797_SARS_CBD; DEG_GSE179661_HepG2; DEG_GSE201508_cGAMP; DEG_GSE235310_LPS; DEG_GSE235310_Veh; DEG_GSE272113_CBD; DEG_GSE272113_sCBD; DEG_GSE274859_LPS_24h
TMEM120A	10	1	DEG_GSE235310_LPS	9	DEG_GSE131565; DEG_GSE151512_24h; DEG_GSE168797_Mock_CBD; DEG_GSE179661_HepG2; DEG_GSE179661_MHCC97H; DEG_GSE261716_CBD0.2_2d; DEG_GSE272113_CBD; DEG_GSE272113_sCBD; DEG_GSE274859_LPS_24h
TMEM38B	10	1	DEG_GSE261716_CBD20_28d	9	DEG_GSE131565; DEG_GSE151512_12h; DEG_GSE151512_24h; DEG_GSE168797_Mock_CBD; DEG_GSE168797_SARS_CBD; DEG_GSE179661_MHCC97H; DEG_GSE201508_cGAMP; DEG_GSE235310_LPS; DEG_GSE235310_Veh
TMEM43	10	6	DEG_GSE131565; DEG_GSE151512_24h; DEG_GSE151512_6h; DEG_GSE201508_cGAMP; DEG_GSE272113_CBD; DEG_GSE272113_sCBD	4	DEG_GSE168797_Mock_CBD; DEG_GSE168797_SARS_CBD; DEG_GSE168797_SARS_CBDV; DEG_GSE179661_HepG2
TOB1	10	7	DEG_GSE168797_Mock_CBD; DEG_GSE168797_SARS_CBD; DEG_GSE168797_SARS_CBDV; DEG_GSE179661_HepG2; DEG_GSE179661_MHCC97H; DEG_GSE272113_CBD; DEG_GSE272113_sCBD	3	DEG_GSE131565; DEG_GSE168797_Mock_CBDV; DEG_GSE235310_Veh
TOMM40	10	5	DEG_GSE131565; DEG_GSE151512_24h; DEG_GSE179661_MHCC97H; DEG_GSE201508_cGAMP; DEG_GSE274859_LPS_24h	5	DEG_GSE179661_HepG2; DEG_GSE235310_LPS; DEG_GSE235310_Veh; DEG_GSE272113_CBD; DEG_GSE272113_sCBD
TONSL	10	9	DEG_GSE131565; DEG_GSE151512_24h; DEG_GSE168797_Mock_CBD; DEG_GSE168797_SARS_CBD; DEG_GSE179661_MHCC97H; DEG_GSE201508_cGAMP; DEG_GSE235310_LPS; DEG_GSE235310_Veh; DEG_GSE274859_LPS_24h	1	DEG_GSE266113_WT
TOR3A	10	7	DEG_GSE131565; DEG_GSE168797_Mock_CBD; DEG_GSE168797_SARS_CBD; DEG_GSE179661_MHCC97H; DEG_GSE201508_cGAMP; DEG_GSE232624_Veh_CBD3_12h; DEG_GSE261716_CBD20_28d	3	DEG_GSE235310_LPS; DEG_GSE235310_Veh; DEG_GSE274859_LPS_24h
TOR4A	10	8	DEG_GSE168797_Mock_CBD; DEG_GSE201508_cGAMP; DEG_GSE235310_LPS; DEG_GSE235310_Veh; DEG_GSE266113_mutNdufs4; DEG_GSE272113_CBD; DEG_GSE272113_sCBD; DEG_GSE274859_LPS_24h	2	DEG_GSE131565; DEG_GSE179661_HepG2
TP53I11	10	9	DEG_GSE131565; DEG_GSE151512_12h; DEG_GSE151512_24h; DEG_GSE151512_6h; DEG_GSE168797_Mock_CBD; DEG_GSE168797_SARS_CBD; DEG_GSE179661_MHCC97H; DEG_GSE261716_CBD0.2_2d; DEG_GSE274859_LPS_24h	1	DEG_GSE152088
TPP1	10	2	DEG_GSE151512_6h; DEG_GSE179661_HepG2	8	DEG_GSE131565; DEG_GSE168797_Mock_CBD; DEG_GSE168797_SARS_CBD; DEG_GSE201508_cGAMP; DEG_GSE235310_LPS; DEG_GSE272113_CBD; DEG_GSE272113_sCBD; DEG_GSE274859_LPS_24h
TPX2	10	10	DEG_GSE131565; DEG_GSE151512_12h; DEG_GSE151512_24h; DEG_GSE151512_6h; DEG_GSE168797_Mock_CBD; DEG_GSE168797_SARS_CBD; DEG_GSE179661_HepG2; DEG_GSE179661_MHCC97H; DEG_GSE201508_cGAMP; DEG_GSE274859_LPS_24h	0	NA
TRIP13	10	9	DEG_GSE131565; DEG_GSE152088; DEG_GSE168797_Mock_CBD; DEG_GSE168797_SARS_CBD; DEG_GSE179661_HepG2; DEG_GSE179661_MHCC97H; DEG_GSE201508_cGAMP; DEG_GSE261716_CBD0.2_28d; DEG_GSE274859_LPS_24h	1	DEG_GSE266113_WT
TTYH3	10	8	DEG_GSE151512_12h; DEG_GSE151512_24h; DEG_GSE151512_6h; DEG_GSE168797_Mock_CBD; DEG_GSE168797_SARS_CBD; DEG_GSE179661_MHCC97H; DEG_GSE261716_CBD0.2_2d; DEG_GSE261716_CBD20_2d	2	DEG_GSE152088; DEG_GSE179661_HepG2
TUBA1A	10	7	DEG_GSE131565; DEG_GSE151512_24h; DEG_GSE235310_LPS; DEG_GSE235310_Veh; DEG_GSE272113_CBD; DEG_GSE272113_sCBD; DEG_GSE274859_LPS_24h	3	DEG_GSE168797_SARS_CBD; DEG_GSE168797_SARS_CBDV; DEG_GSE232624_EtOH0.75_CBD0.75_12h
TUBE1	10	0	NA	10	DEG_GSE131565; DEG_GSE151512_12h; DEG_GSE151512_24h; DEG_GSE151512_6h; DEG_GSE168797_Mock_CBD; DEG_GSE168797_SARS_CBD; DEG_GSE179661_MHCC97H; DEG_GSE201508_cGAMP; DEG_GSE235310_LPS; DEG_GSE235310_Veh
UBAP2L	10	10	DEG_GSE131565; DEG_GSE151512_12h; DEG_GSE151512_24h; DEG_GSE151512_6h; DEG_GSE168797_Mock_CBD; DEG_GSE168797_SARS_CBD; DEG_GSE179661_HepG2; DEG_GSE179661_MHCC97H; DEG_GSE232624_EtOH0.75_CBD0.75_6h; DEG_GSE235310_Veh	0	NA
UGCG	10	3	DEG_GSE168797_Mock_CBDV; DEG_GSE272113_CBD; DEG_GSE272113_sCBD	7	DEG_GSE151512_6h; DEG_GSE168797_Mock_CBD; DEG_GSE168797_SARS_CBD; DEG_GSE179661_HepG2; DEG_GSE179661_MHCC97H; DEG_GSE235310_Veh; DEG_GSE274859_LPS_24h
UPP1	10	1	DEG_GSE168797_Mock_CBDV	9	DEG_GSE131565; DEG_GSE151512_24h; DEG_GSE168797_Mock_CBD; DEG_GSE168797_SARS_CBD; DEG_GSE179661_HepG2; DEG_GSE179661_MHCC97H; DEG_GSE232624_EtOH0.75_CBD0.75_6h; DEG_GSE235310_Veh; DEG_GSE272113_sCBD
URB2	10	7	DEG_GSE131565; DEG_GSE168797_Mock_CBD; DEG_GSE168797_SARS_CBD; DEG_GSE179661_MHCC97H; DEG_GSE201508_cGAMP; DEG_GSE201508_enthanol; DEG_GSE274859_LPS_24h	3	DEG_GSE151512_12h; DEG_GSE266113_WT; DEG_GSE272113_CBD
USO1	10	1	DEG_GSE179661_HepG2	9	DEG_GSE131565; DEG_GSE151512_12h; DEG_GSE151512_24h; DEG_GSE168797_Mock_CBD; DEG_GSE168797_SARS_CBD; DEG_GSE179661_MHCC97H; DEG_GSE201508_cGAMP; DEG_GSE261716_CBD0.2_28d; DEG_GSE274859_LPS_24h
USP53	10	3	DEG_GSE232624_EtOH0.25_CBD0.75_12h; DEG_GSE235310_LPS; DEG_GSE235310_Veh	7	DEG_GSE131565; DEG_GSE168797_Mock_CBD; DEG_GSE168797_SARS_CBD; DEG_GSE179661_HepG2; DEG_GSE179661_MHCC97H; DEG_GSE272113_CBD; DEG_GSE272113_sCBD
VAV3	10	4	DEG_GSE168797_Mock_CBD; DEG_GSE168797_SARS_CBD; DEG_GSE179661_HepG2; DEG_GSE261716_CBD10_2d	6	DEG_GSE152088; DEG_GSE201508_cGAMP; DEG_GSE235310_LPS; DEG_GSE261716_CBD20_28d; DEG_GSE274435_DMSO_24h; DEG_GSE274435_EtOH_24h
VPS8	10	6	DEG_GSE152088; DEG_GSE168797_SARS_CBD; DEG_GSE168797_SARS_CBDV; DEG_GSE179661_HepG2; DEG_GSE235310_LPS; DEG_GSE261716_CBD20_2d	4	DEG_GSE131565; DEG_GSE168797_Mock_CBD; DEG_GSE201508_cGAMP; DEG_GSE274859_LPS_24h
WDFY2	10	3	DEG_GSE235310_LPS; DEG_GSE235310_Veh; DEG_GSE261716_CBD20_2d	7	DEG_GSE131565; DEG_GSE151512_12h; DEG_GSE151512_24h; DEG_GSE151512_3h; DEG_GSE151512_6h; DEG_GSE179661_MHCC97H; DEG_GSE272113_CBD
WDR91	10	7	DEG_GSE131565; DEG_GSE151512_24h; DEG_GSE151512_6h; DEG_GSE168797_SARS_CBD; DEG_GSE168797_SARS_CBDV; DEG_GSE179661_HepG2; DEG_GSE261716_CBD20_2d	3	DEG_GSE168797_Mock_CBDV; DEG_GSE235310_LPS; DEG_GSE274859_LPS_24h
WDTC1	10	7	DEG_GSE151512_12h; DEG_GSE151512_24h; DEG_GSE151512_6h; DEG_GSE235310_Veh; DEG_GSE261716_CBD20_28d; DEG_GSE261716_CBD20_2d; DEG_GSE266113_WT	3	DEG_GSE179661_MHCC97H; DEG_GSE272113_CBD; DEG_GSE274859_LPS_24h
WEE1	10	4	DEG_GSE151512_12h; DEG_GSE168797_Mock_CBD; DEG_GSE168797_SARS_CBD; DEG_GSE274859_LPS_24h	6	DEG_GSE131565; DEG_GSE179661_MHCC97H; DEG_GSE261716_CBD10_28d; DEG_GSE261716_CBD20_28d; DEG_GSE272113_CBD; DEG_GSE272113_sCBD
WHAMM	10	1	DEG_GSE235310_LPS	9	DEG_GSE131565; DEG_GSE151512_24h; DEG_GSE168797_Mock_CBD; DEG_GSE168797_SARS_CBD; DEG_GSE179661_HepG2; DEG_GSE179661_MHCC97H; DEG_GSE201508_cGAMP; DEG_GSE235310_Veh; DEG_GSE272113_sCBD
XIAP	10	2	DEG_GSE272113_sCBD; DEG_GSE274859_LPS_24h	8	DEG_GSE131565; DEG_GSE168797_SARS_CBD; DEG_GSE179661_HepG2; DEG_GSE179661_MHCC97H; DEG_GSE201508_cGAMP; DEG_GSE232624_EtOH0.25_CBD0.75_12h; DEG_GSE235310_LPS; DEG_GSE235310_Veh
YPEL5	10	1	DEG_GSE235310_LPS	9	DEG_GSE131565; DEG_GSE151512_12h; DEG_GSE151512_24h; DEG_GSE168797_Mock_CBD; DEG_GSE168797_SARS_CBD; DEG_GSE179661_HepG2; DEG_GSE179661_MHCC97H; DEG_GSE274435_DMSO_24h; DEG_GSE274859_LPS_24h
ZCCHC24	10	6	DEG_GSE131565; DEG_GSE168797_Mock_CBDV; DEG_GSE201508_cGAMP; DEG_GSE201508_enthanol; DEG_GSE235310_LPS; DEG_GSE235310_Veh	4	DEG_GSE151512_24h; DEG_GSE168797_Mock_CBD; DEG_GSE168797_SARS_CBD; DEG_GSE179661_MHCC97H
ZDHHC12	10	6	DEG_GSE151512_24h; DEG_GSE168797_Mock_CBD; DEG_GSE168797_SARS_CBD; DEG_GSE179661_MHCC97H; DEG_GSE201508_cGAMP; DEG_GSE235310_LPS	4	DEG_GSE152088; DEG_GSE179661_HepG2; DEG_GSE272113_CBD; GSE70689_CBD_wLPS
ZEB1	10	5	DEG_GSE131565; DEG_GSE235310_LPS; DEG_GSE235310_Veh; DEG_GSE272113_sCBD; DEG_GSE274859_LPS_24h	5	DEG_GSE151512_24h; DEG_GSE168797_Mock_CBD; DEG_GSE179661_HepG2; DEG_GSE179661_MHCC97H; DEG_GSE274435_DMSO_24h
ZFAND1	10	1	DEG_GSE272113_CBD	9	DEG_GSE131565; DEG_GSE151512_12h; DEG_GSE151512_24h; DEG_GSE168797_Mock_CBD; DEG_GSE168797_SARS_CBD; DEG_GSE179661_MHCC97H; DEG_GSE235310_Veh; DEG_GSE261716_CBD0.2_28d; DEG_GSE261716_CBD20_28d
ZFP36	10	3	DEG_GSE168797_SARS_CBD; DEG_GSE168797_SARS_CBDV; DEG_GSE235310_LPS	7	DEG_GSE131565; DEG_GSE152088; DEG_GSE168797_Mock_CBD; DEG_GSE179661_HepG2; DEG_GSE179661_MHCC97H; DEG_GSE272113_CBD; DEG_GSE272113_sCBD
ZFP36L2	10	6	DEG_GSE131565; DEG_GSE151512_24h; DEG_GSE168797_Mock_CBD; DEG_GSE168797_SARS_CBDV; DEG_GSE201508_cGAMP; DEG_GSE274859_LPS_24h	4	DEG_GSE179661_MHCC97H; DEG_GSE235310_LPS; DEG_GSE272113_CBD; DEG_GSE272113_sCBD
ZNF326	10	10	DEG_GSE131565; DEG_GSE151512_12h; DEG_GSE151512_24h; DEG_GSE168797_Mock_CBD; DEG_GSE179661_HepG2; DEG_GSE201508_cGAMP; DEG_GSE235310_LPS; DEG_GSE261716_CBD10_28d; DEG_GSE270378_CBD0.75_24h; DEG_GSE270378_CBD1.5_24h	0	NA
ZNF367	10	6	DEG_GSE131565; DEG_GSE151512_12h; DEG_GSE151512_24h; DEG_GSE168797_Mock_CBD; DEG_GSE168797_SARS_CBD; DEG_GSE201508_cGAMP	4	DEG_GSE179661_MHCC97H; DEG_GSE266113_WT; DEG_GSE272113_CBD; DEG_GSE272113_sCBD
ZNF395	10	8	DEG_GSE131565; DEG_GSE151512_12h; DEG_GSE151512_24h; DEG_GSE151512_6h; DEG_GSE179661_HepG2; DEG_GSE261716_CBD0.2_28d; DEG_GSE261716_CBD20_28d; DEG_GSE261716_CBD20_2d	2	DEG_GSE152088; DEG_GSE272113_CBD
ZNF699	10	2	DEG_GSE168797_SARS_CBDV; DEG_GSE274859_LPS_24h	8	DEG_GSE168797_Mock_CBD; DEG_GSE179661_HepG2; DEG_GSE179661_MHCC97H; DEG_GSE261716_CBD20_28d; DEG_GSE261716_CBD20_2d
ABCC4	9	5	DEG_GSE168797_Mock_CBD; DEG_GSE168797_SARS_CBD; DEG_GSE179661_MHCC97H; DEG_GSE235310_LPS; DEG_GSE235310_Veh	4	DEG_GSE272113_CBD; DEG_GSE272113_sCBD; DEG_GSE274435_DMSO_24h; DEG_GSE274435_DMSO_4h
ABCG2	9	4	DEG_GSE131565; DEG_GSE179661_MHCC97H; DEG_GSE272113_CBD; DEG_GSE272113_sCBD	5	DEG_GSE168797_Mock_CBD; DEG_GSE168797_SARS_CBD; DEG_GSE168797_SARS_CBDV; DEG_GSE235310_LPS; DEG_GSE235310_Veh
ABHD5	9	1	DEG_GSE201508_cGAMP	8	DEG_GSE131565; DEG_GSE151512_24h; DEG_GSE168797_Mock_CBD; DEG_GSE168797_SARS_CBD; DEG_GSE179661_HepG2; DEG_GSE179661_MHCC97H; DEG_GSE235310_LPS; DEG_GSE235310_Veh
ABLIM3	9	3	DEG_GSE168797_Mock_CBDV; DEG_GSE272113_CBD; DEG_GSE272113_sCBD	6	DEG_GSE131565; DEG_GSE168797_Mock_CBD; DEG_GSE168797_SARS_CBD; DEG_GSE179661_HepG2; DEG_GSE179661_MHCC97H; DEG_GSE235310_Veh
ACACB	9	7	DEG_GSE168797_SARS_CBD; DEG_GSE179661_HepG2; DEG_GSE179661_MHCC97H; DEG_GSE235310_Veh; DEG_GSE261716_CBD10_28d; DEG_GSE261716_CBD20_28d; DEG_GSE261716_CBD20_2d	2	DEG_GSE151512_24h; DEG_GSE232624_EtOH0.75_CBD0.75_12h
ACADVL	9	2	DEG_GSE272113_CBD; DEG_GSE272113_sCBD	7	DEG_GSE131565; DEG_GSE151512_12h; DEG_GSE168797_Mock_CBD; DEG_GSE168797_SARS_CBD; DEG_GSE179661_HepG2; DEG_GSE179661_MHCC97H; DEG_GSE261716_CBD0.2_2d
ACOT13	9	1	DEG_GSE179661_HepG2	8	DEG_GSE168797_Mock_CBD; DEG_GSE168797_SARS_CBD; DEG_GSE168797_SARS_CBDV; DEG_GSE235310_Veh; DEG_GSE261716_CBD20_28d; DEG_GSE261716_CBD20_2d; DEG_GSE272113_sCBD; DEG_GSE274859_LPS_24h
ACSL3	9	3	DEG_GSE261716_CBD0.2_2d; DEG_GSE261716_CBD20_28d; DEG_GSE272113_sCBD	6	DEG_GSE131565; DEG_GSE151512_12h; DEG_GSE151512_24h; DEG_GSE179661_HepG2; DEG_GSE201508_cGAMP; DEG_GSE201508_enthanol
ACTG1	9	7	DEG_GSE131565; DEG_GSE151512_12h; DEG_GSE151512_6h; DEG_GSE152088; DEG_GSE168797_Mock_CBD; DEG_GSE168797_SARS_CBD; DEG_GSE235310_LPS	2	DEG_GSE179661_HepG2; DEG_GSE274859_LPS_24h
ACY1	9	7	DEG_GSE131565; DEG_GSE168797_Mock_CBD; DEG_GSE179661_HepG2; DEG_GSE201508_cGAMP; DEG_GSE235310_LPS; DEG_GSE261716_CBD20_28d; DEG_GSE274859_LPS_24h	2	DEG_GSE168797_SARS_CBDV; DEG_GSE261716_CBD0.2_2d
ADA	9	5	DEG_GSE131565; DEG_GSE168797_Mock_CBD; DEG_GSE168797_Mock_CBDV; DEG_GSE179661_MHCC97H; DEG_GSE274859_LPS_24h	4	DEG_GSE151512_12h; DEG_GSE151512_24h; DEG_GSE168797_SARS_CBDV; DEG_GSE235310_LPS
ADAM15	9	6	DEG_GSE131565; DEG_GSE151512_3h; DEG_GSE151512_6h; DEG_GSE168797_Mock_CBD; DEG_GSE179661_MHCC97H; DEG_GSE274859_LPS_24h	3	DEG_GSE152088; DEG_GSE179661_HepG2; DEG_GSE235310_LPS
ADCY6	9	4	DEG_GSE168797_Mock_CBD; DEG_GSE168797_SARS_CBD; DEG_GSE179661_MHCC97H; DEG_GSE201508_enthanol	5	DEG_GSE131565; DEG_GSE168797_Mock_CBDV; DEG_GSE272113_CBD; DEG_GSE272113_sCBD; DEG_GSE274859_LPS_24h
ADORA2B	9	3	DEG_GSE131565; DEG_GSE274859_LPS_24h; GSE70689_CBD_NoLPS	6	DEG_GSE168797_Mock_CBD; DEG_GSE168797_SARS_CBD; DEG_GSE179661_HepG2; DEG_GSE235310_LPS; DEG_GSE272113_CBD; DEG_GSE272113_sCBD
ADSS2	9	1	DEG_GSE131565	8	DEG_GSE151512_12h; DEG_GSE151512_24h; DEG_GSE168797_Mock_CBD; DEG_GSE168797_SARS_CBD; DEG_GSE168797_SARS_CBDV; DEG_GSE179661_MHCC97H; DEG_GSE235310_Veh; DEG_GSE266113_WT
AHCYL1	9	3	DEG_GSE168797_Mock_CBD; DEG_GSE179661_HepG2; DEG_GSE179661_MHCC97H	6	DEG_GSE131565; DEG_GSE151512_24h; DEG_GSE201508_cGAMP; DEG_GSE235310_LPS; DEG_GSE235310_Veh; DEG_GSE274859_LPS_24h
AHNAK2	9	1	DEG_GSE232624_EtOH0.25_CBD0.75_12h	8	DEG_GSE131565; DEG_GSE152088; DEG_GSE168797_SARS_CBDV; DEG_GSE179661_HepG2; DEG_GSE179661_MHCC97H; DEG_GSE201508_cGAMP; DEG_GSE272113_CBD; DEG_GSE274859_LPS_24h
AKAP11	9	6	DEG_GSE168797_Mock_CBD; DEG_GSE168797_SARS_CBD; DEG_GSE179661_HepG2; DEG_GSE235310_Veh; DEG_GSE261716_CBD20_28d; DEG_GSE261716_CBD20_2d	3	DEG_GSE270378_CBD0.325_24h; DEG_GSE270378_CBD0.75_24h; DEG_GSE270378_CBD1.5_24h
AKR1B1	9	3	DEG_GSE151512_12h; DEG_GSE151512_24h; DEG_GSE179661_MHCC97H	6	DEG_GSE131565; DEG_GSE152088; DEG_GSE168797_SARS_CBD; DEG_GSE179661_HepG2; DEG_GSE232624_EtOH0.75_CBD0.75_12h; DEG_GSE235310_LPS
ALDH1A3	9	3	DEG_GSE168797_Mock_CBDV; DEG_GSE168797_SARS_CBD; DEG_GSE235310_LPS	6	DEG_GSE131565; DEG_GSE151512_12h; DEG_GSE151512_24h; DEG_GSE151512_3h; DEG_GSE152088; DEG_GSE168797_SARS_CBDV
ALDH3B1	9	5	DEG_GSE168797_Mock_CBD; DEG_GSE168797_SARS_CBD; DEG_GSE201508_cGAMP; DEG_GSE272113_CBD; DEG_GSE272113_sCBD	4	DEG_GSE151512_12h; DEG_GSE151512_24h; DEG_GSE235310_LPS; DEG_GSE235310_Veh
AMPD3	9	1	DEG_GSE151512_24h	8	DEG_GSE131565; DEG_GSE168797_Mock_CBD; DEG_GSE168797_SARS_CBD; DEG_GSE179661_HepG2; DEG_GSE235310_LPS; DEG_GSE272113_CBD; DEG_GSE272113_sCBD; DEG_GSE274859_LPS_24h
ANAPC7	9	7	DEG_GSE131565; DEG_GSE151512_24h; DEG_GSE151512_6h; DEG_GSE168797_Mock_CBD; DEG_GSE168797_SARS_CBD; DEG_GSE179661_HepG2; DEG_GSE179661_MHCC97H	2	DEG_GSE261716_CBD0.2_2d; DEG_GSE274859_LPS_24h
ANKRD1	9	4	DEG_GSE131565; DEG_GSE168797_SARS_CBDV; DEG_GSE272113_CBD; DEG_GSE272113_sCBD	5	DEG_GSE168797_Mock_CBD; DEG_GSE168797_SARS_CBD; DEG_GSE179661_HepG2; DEG_GSE179661_MHCC97H; DEG_GSE235310_LPS
ANKRD9	9	4	DEG_GSE168797_Mock_CBD; DEG_GSE168797_SARS_CBD; DEG_GSE232624_EtOH0.75_CBD0.75_6h; DEG_GSE274859_LPS_24h	5	DEG_GSE131565; DEG_GSE151512_24h; DEG_GSE152088; DEG_GSE179661_HepG2; DEG_GSE179661_MHCC97H
ANOS1	9	2	DEG_GSE168797_SARS_CBD; DEG_GSE168797_SARS_CBDV	7	DEG_GSE151512_24h; DEG_GSE168797_Mock_CBD; DEG_GSE235310_LPS; DEG_GSE261716_CBD20_2d; DEG_GSE266113_mutNdufs4; DEG_GSE272113_sCBD; DEG_GSE274859_LPS_24h
ANXA1	9	0	NA	9	DEG_GSE131565; DEG_GSE168797_Mock_CBD; DEG_GSE168797_SARS_CBD; DEG_GSE168797_SARS_CBDV; DEG_GSE179661_HepG2; DEG_GSE179661_MHCC97H; DEG_GSE201508_cGAMP; DEG_GSE201508_enthanol; DEG_GSE235310_LPS
AP1S3	9	9	DEG_GSE131565; DEG_GSE152088; DEG_GSE168797_Mock_CBD; DEG_GSE168797_SARS_CBD; DEG_GSE179661_MHCC97H; DEG_GSE232624_EtOH0.75_CBD0.75_6h; DEG_GSE232624_Veh_CBD0.75_12h; DEG_GSE232624_Veh_CBD3_12h; DEG_GSE235310_LPS	0	NA
AP3M1	9	6	DEG_GSE151512_12h; DEG_GSE151512_24h; DEG_GSE168797_Mock_CBD; DEG_GSE179661_HepG2; DEG_GSE179661_MHCC97H; DEG_GSE232624_EtOH0.75_CBD0.75_6h	3	DEG_GSE131565; DEG_GSE272113_CBD; DEG_GSE274859_LPS_24h
AP3M2	9	3	DEG_GSE131565; DEG_GSE179661_HepG2; DEG_GSE179661_MHCC97H	6	DEG_GSE151512_12h; DEG_GSE151512_24h; DEG_GSE201508_cGAMP; DEG_GSE235310_LPS; DEG_GSE235310_Veh; DEG_GSE274859_LPS_24h
APBA3	9	3	DEG_GSE151512_6h; DEG_GSE168797_SARS_CBDV; DEG_GSE235310_LPS	6	DEG_GSE131565; DEG_GSE168797_Mock_CBD; DEG_GSE179661_HepG2; DEG_GSE179661_MHCC97H; DEG_GSE274859_LPS_24h; GSE70689_CBD_NoLPS
APEH	9	8	DEG_GSE131565; DEG_GSE151512_24h; DEG_GSE168797_Mock_CBD; DEG_GSE168797_SARS_CBD; DEG_GSE179661_HepG2; DEG_GSE179661_MHCC97H; DEG_GSE261716_CBD20_28d; DEG_GSE274859_LPS_24h	1	DEG_GSE261716_CBD0.2_2d
APOE	9	1	DEG_GSE131565	8	DEG_GSE151512_24h; DEG_GSE152088; DEG_GSE168797_Mock_CBD; DEG_GSE179661_HepG2; DEG_GSE235310_LPS; DEG_GSE235310_Veh; DEG_GSE261716_CBD0.2_2d; DEG_GSE274859_LPS_24h
APOL6	9	3	DEG_GSE168797_Mock_CBDV; DEG_GSE179661_HepG2; DEG_GSE201508_cGAMP	6	DEG_GSE168797_Mock_CBD; DEG_GSE168797_SARS_CBD; DEG_GSE168797_SARS_CBDV; DEG_GSE179661_MHCC97H; DEG_GSE235310_LPS; DEG_GSE235310_Veh
AQP3	9	2	DEG_GSE235310_LPS; DEG_GSE235310_Veh	7	DEG_GSE131565; DEG_GSE151512_24h; DEG_GSE152088; DEG_GSE168797_Mock_CBD; DEG_GSE168797_SARS_CBD; DEG_GSE179661_HepG2; DEG_GSE274859_LPS_24h
ARF4	9	0	NA	9	DEG_GSE131565; DEG_GSE168797_Mock_CBD; DEG_GSE168797_SARS_CBD; DEG_GSE179661_HepG2; DEG_GSE179661_MHCC97H; DEG_GSE201508_cGAMP; DEG_GSE261716_CBD0.2_28d; DEG_GSE261716_CBD20_28d; DEG_GSE274859_LPS_24h
ARHGAP33	9	8	DEG_GSE131565; DEG_GSE151512_24h; DEG_GSE168797_Mock_CBD; DEG_GSE168797_SARS_CBD; DEG_GSE201508_enthanol; DEG_GSE235310_Veh; DEG_GSE274435_DMSO_24h; DEG_GSE274859_LPS_24h	1	DEG_GSE179661_HepG2
ARHGEF19	9	8	DEG_GSE151512_12h; DEG_GSE151512_24h; DEG_GSE168797_Mock_CBD; DEG_GSE168797_SARS_CBD; DEG_GSE201508_cGAMP; DEG_GSE272113_CBD; DEG_GSE272113_sCBD; DEG_GSE275998_CDB20	1	DEG_GSE179661_MHCC97H
ARHGEF3	9	5	DEG_GSE131565; DEG_GSE179661_HepG2; DEG_GSE272113_CBD; DEG_GSE272113_sCBD; DEG_GSE274859_LPS_24h	4	DEG_GSE151512_24h; DEG_GSE168797_Mock_CBD; DEG_GSE168797_SARS_CBD; GSE70689_CBD_NoLPS
ARL1	9	0	NA	9	DEG_GSE131565; DEG_GSE151512_24h; DEG_GSE168797_Mock_CBD; DEG_GSE168797_SARS_CBD; DEG_GSE179661_MHCC97H; DEG_GSE201508_cGAMP; DEG_GSE261716_CBD0.2_28d; DEG_GSE261716_CBD20_28d; DEG_GSE274859_LPS_24h
ARL4A	9	3	DEG_GSE235310_LPS; DEG_GSE235310_Veh; DEG_GSE261716_CBD20_28d	6	DEG_GSE131565; DEG_GSE168797_Mock_CBDV; DEG_GSE179661_MHCC97H; DEG_GSE201508_cGAMP; DEG_GSE201508_enthanol; DEG_GSE272113_sCBD
ARL4C	9	8	DEG_GSE131565; DEG_GSE151512_12h; DEG_GSE151512_6h; DEG_GSE168797_Mock_CBDV; DEG_GSE179661_MHCC97H; DEG_GSE235310_Veh; DEG_GSE272113_CBD; DEG_GSE272113_sCBD	1	DEG_GSE179661_HepG2
ARL8B	9	0	NA	9	DEG_GSE131565; DEG_GSE168797_Mock_CBD; DEG_GSE168797_SARS_CBD; DEG_GSE179661_MHCC97H; DEG_GSE201508_cGAMP; DEG_GSE201508_enthanol; DEG_GSE261716_CBD20_28d; DEG_GSE272113_CBD; DEG_GSE274859_LPS_24h
ARMCX6	9	2	DEG_GSE151512_24h; DEG_GSE179661_HepG2	7	DEG_GSE131565; DEG_GSE168797_Mock_CBD; DEG_GSE168797_SARS_CBD; DEG_GSE179661_MHCC97H; DEG_GSE201508_cGAMP; DEG_GSE274435_DMSO_24h; DEG_GSE274435_EtOH_24h
ARRB2	9	7	DEG_GSE131565; DEG_GSE151512_6h; DEG_GSE168797_Mock_CBD; DEG_GSE168797_SARS_CBD; DEG_GSE201508_cGAMP; DEG_GSE235310_LPS; DEG_GSE274859_LPS_24h	2	DEG_GSE179661_HepG2; DEG_GSE179661_MHCC97H
ATAD2	9	8	DEG_GSE131565; DEG_GSE168797_Mock_CBD; DEG_GSE168797_SARS_CBD; DEG_GSE179661_HepG2; DEG_GSE179661_MHCC97H; DEG_GSE235310_LPS; DEG_GSE235310_Veh; DEG_GSE274859_LPS_24h	1	DEG_GSE266113_WT
ATG101	9	4	DEG_GSE151512_24h; DEG_GSE235310_LPS; DEG_GSE261716_CBD0.2_28d; DEG_GSE261716_CBD20_28d	5	DEG_GSE131565; DEG_GSE168797_Mock_CBD; DEG_GSE168797_SARS_CBD; DEG_GSE179661_HepG2; DEG_GSE179661_MHCC97H
ATP1B1	9	5	DEG_GSE151512_12h; DEG_GSE151512_24h; DEG_GSE151512_6h; DEG_GSE179661_HepG2; DEG_GSE179661_MHCC97H	4	DEG_GSE131565; DEG_GSE168797_SARS_CBD; DEG_GSE168797_SARS_CBDV; DEG_GSE235310_LPS
ATP5F1B	9	7	DEG_GSE131565; DEG_GSE168797_Mock_CBD; DEG_GSE168797_SARS_CBD; DEG_GSE179661_HepG2; DEG_GSE179661_MHCC97H; DEG_GSE272113_CBD; DEG_GSE274859_LPS_24h	2	DEG_GSE232624_Veh_CBD3_12h; DEG_GSE261716_CBD0.2_2d
ATP5MF	9	7	DEG_GSE131565; DEG_GSE151512_24h; DEG_GSE179661_HepG2; DEG_GSE179661_MHCC97H; DEG_GSE235310_Veh; DEG_GSE272113_CBD; DEG_GSE274859_LPS_24h	2	DEG_GSE261716_CBD0.2_2d; DEG_GSE261716_CBD20_2d
ATP5PD	9	5	DEG_GSE131565; DEG_GSE151512_24h; DEG_GSE179661_HepG2; DEG_GSE179661_MHCC97H; DEG_GSE272113_CBD	4	DEG_GSE168797_SARS_CBD; DEG_GSE168797_SARS_CBDV; DEG_GSE261716_CBD0.2_2d; DEG_GSE261716_CBD20_2d
ATP5PF	9	4	DEG_GSE131565; DEG_GSE151512_24h; DEG_GSE179661_HepG2; DEG_GSE272113_CBD	5	DEG_GSE151512_6h; DEG_GSE168797_SARS_CBD; DEG_GSE168797_SARS_CBDV; DEG_GSE261716_CBD20_28d; DEG_GSE261716_CBD20_2d
ATP6V0D2	9	0	NA	9	DEG_GSE131565; DEG_GSE168797_Mock_CBD; DEG_GSE168797_SARS_CBD; DEG_GSE179661_HepG2; DEG_GSE179661_MHCC97H; DEG_GSE201508_cGAMP; DEG_GSE201508_enthanol; DEG_GSE235310_LPS; DEG_GSE235310_Veh
ATP6V1D	9	3	DEG_GSE151512_12h; DEG_GSE151512_24h; DEG_GSE272113_CBD	6	DEG_GSE131565; DEG_GSE168797_Mock_CBD; DEG_GSE168797_SARS_CBD; DEG_GSE179661_HepG2; DEG_GSE235310_LPS; DEG_GSE274859_LPS_24h
AURKB	9	9	DEG_GSE131565; DEG_GSE151512_12h; DEG_GSE151512_3h; DEG_GSE151512_6h; DEG_GSE168797_Mock_CBD; DEG_GSE168797_SARS_CBD; DEG_GSE179661_HepG2; DEG_GSE232624_EtOH0.75_CBD0.75_12h; DEG_GSE274859_LPS_24h	0	NA
BACE1	9	8	DEG_GSE131565; DEG_GSE151512_6h; DEG_GSE168797_SARS_CBD; DEG_GSE179661_MHCC97H; DEG_GSE201508_cGAMP; DEG_GSE201508_enthanol; DEG_GSE272113_CBD; DEG_GSE272113_sCBD	1	DEG_GSE235310_LPS
BACH2	9	3	DEG_GSE235310_LPS; DEG_GSE261716_CBD10_28d; DEG_GSE261716_CBD20_28d	6	DEG_GSE151512_24h; DEG_GSE168797_Mock_CBD; DEG_GSE168797_SARS_CBD; DEG_GSE179661_HepG2; DEG_GSE179661_MHCC97H; DEG_GSE274859_LPS_24h
BAG3	9	1	DEG_GSE272113_CBD	8	DEG_GSE131565; DEG_GSE168797_Mock_CBD; DEG_GSE168797_SARS_CBD; DEG_GSE179661_HepG2; DEG_GSE179661_MHCC97H; DEG_GSE201508_cGAMP; DEG_GSE235310_LPS; DEG_GSE235310_Veh
BAP1	9	8	DEG_GSE131565; DEG_GSE151512_12h; DEG_GSE151512_24h; DEG_GSE151512_6h; DEG_GSE168797_Mock_CBD; DEG_GSE168797_SARS_CBD; DEG_GSE168797_SARS_CBDV; DEG_GSE235310_Veh	1	DEG_GSE179661_HepG2
BASP1	9	7	DEG_GSE151512_12h; DEG_GSE151512_24h; DEG_GSE168797_Mock_CBD; DEG_GSE235310_LPS; DEG_GSE272113_CBD; DEG_GSE272113_sCBD; DEG_GSE274435_DMSO_24h	2	DEG_GSE168797_Mock_CBDV; DEG_GSE201508_enthanol
BCAR1	9	6	DEG_GSE151512_24h; DEG_GSE168797_SARS_CBD; DEG_GSE261716_CBD0.2_28d; DEG_GSE272113_CBD; DEG_GSE272113_sCBD; DEG_GSE274859_LPS_24h	3	DEG_GSE179661_HepG2; DEG_GSE179661_MHCC97H; DEG_GSE235310_LPS
BCL10	9	3	DEG_GSE168797_Mock_CBDV; DEG_GSE168797_SARS_CBDV; DEG_GSE272113_CBD	6	DEG_GSE131565; DEG_GSE168797_Mock_CBD; DEG_GSE179661_HepG2; DEG_GSE179661_MHCC97H; DEG_GSE235310_LPS; GSE70689_CBD_NoLPS
BCL6	9	3	DEG_GSE168797_SARS_CBDV; DEG_GSE235310_Veh; DEG_GSE272113_CBD	6	DEG_GSE131565; DEG_GSE151512_24h; DEG_GSE152088; DEG_GSE179661_HepG2; DEG_GSE179661_MHCC97H; DEG_GSE235310_LPS
BCOR	9	8	DEG_GSE131565; DEG_GSE151512_6h; DEG_GSE168797_Mock_CBD; DEG_GSE168797_SARS_CBD; DEG_GSE168797_SARS_CBDV; DEG_GSE179661_HepG2; DEG_GSE235310_LPS; DEG_GSE235310_Veh	1	DEG_GSE179661_MHCC97H
BHLHE40	9	2	DEG_GSE168797_SARS_CBDV; DEG_GSE235310_LPS	7	DEG_GSE131565; DEG_GSE168797_Mock_CBD; DEG_GSE179661_HepG2; DEG_GSE179661_MHCC97H; DEG_GSE201508_cGAMP; DEG_GSE201508_enthanol; DEG_GSE274859_LPS_24h
BIN1	9	4	DEG_GSE131565; DEG_GSE168797_Mock_CBD; DEG_GSE261716_CBD20_28d; DEG_GSE261716_CBD20_2d	5	DEG_GSE151512_12h; DEG_GSE151512_24h; DEG_GSE152088; DEG_GSE179661_HepG2; DEG_GSE235310_LPS
BPTF	9	8	DEG_GSE151512_24h; DEG_GSE168797_Mock_CBD; DEG_GSE168797_SARS_CBD; DEG_GSE179661_HepG2; DEG_GSE179661_MHCC97H; DEG_GSE232624_EtOH0.75_CBD0.75_6h; DEG_GSE235310_Veh; DEG_GSE261716_CBD10_28d	1	DEG_GSE201508_cGAMP
BRAF	9	1	DEG_GSE261716_CBD0.2_2d	8	DEG_GSE131565; DEG_GSE151512_24h; DEG_GSE179661_HepG2; DEG_GSE179661_MHCC97H; DEG_GSE201508_cGAMP; DEG_GSE235310_LPS; DEG_GSE235310_Veh; DEG_GSE272113_CBD
BRD4	9	4	DEG_GSE151512_6h; DEG_GSE168797_SARS_CBD; DEG_GSE168797_SARS_CBDV; DEG_GSE261716_CBD10_28d	5	DEG_GSE131565; DEG_GSE179661_HepG2; DEG_GSE179661_MHCC97H; DEG_GSE270378_CBD0.75_24h; DEG_GSE274859_LPS_24h
C12orf75	9	7	DEG_GSE131565; DEG_GSE168797_Mock_CBD; DEG_GSE168797_SARS_CBD; DEG_GSE179661_MHCC97H; DEG_GSE232624_EtOH0.25_CBD0.75_12h; DEG_GSE235310_LPS; DEG_GSE235310_Veh	2	DEG_GSE151512_24h; DEG_GSE232624_Veh_CBD3_12h
C15orf39	9	6	DEG_GSE168797_Mock_CBDV; DEG_GSE179661_MHCC97H; DEG_GSE201508_cGAMP; DEG_GSE235310_LPS; DEG_GSE261716_CBD20_28d; DEG_GSE261716_CBD20_2d	3	DEG_GSE131565; DEG_GSE179661_HepG2; DEG_GSE274859_LPS_24h
C1orf43	9	0	NA	9	DEG_GSE131565; DEG_GSE168797_Mock_CBD; DEG_GSE168797_SARS_CBD; DEG_GSE179661_HepG2; DEG_GSE179661_MHCC97H; DEG_GSE201508_cGAMP; DEG_GSE235310_LPS; DEG_GSE235310_Veh; DEG_GSE261716_CBD20_28d
C1S	9	4	DEG_GSE131565; DEG_GSE179661_HepG2; DEG_GSE179661_MHCC97H; DEG_GSE201508_enthanol	5	DEG_GSE168797_SARS_CBD; DEG_GSE235310_LPS; DEG_GSE235310_Veh; DEG_GSE272113_CBD; DEG_GSE272113_sCBD
C9orf72	9	2	DEG_GSE235310_LPS; DEG_GSE235310_Veh	7	DEG_GSE131565; DEG_GSE168797_Mock_CBD; DEG_GSE168797_SARS_CBD; DEG_GSE179661_HepG2; DEG_GSE179661_MHCC97H; DEG_GSE201508_cGAMP; DEG_GSE274859_LPS_24h
CA2	9	4	DEG_GSE201508_cGAMP; DEG_GSE272113_CBD; DEG_GSE272113_sCBD; DEG_GSE274859_LPS_24h	5	DEG_GSE131565; DEG_GSE179661_HepG2; DEG_GSE235310_LPS; DEG_GSE235310_Veh; DEG_GSE261716_CBD20_28d
CACYBP	9	6	DEG_GSE131565; DEG_GSE151512_24h; DEG_GSE179661_HepG2; DEG_GSE179661_MHCC97H; DEG_GSE232624_EtOH0.25_CBD0.75_6h; DEG_GSE274859_LPS_24h	3	DEG_GSE151512_6h; DEG_GSE168797_SARS_CBD; DEG_GSE272113_sCBD
CADM1	9	3	DEG_GSE168797_Mock_CBD; DEG_GSE168797_SARS_CBD; DEG_GSE179661_HepG2	6	DEG_GSE151512_12h; DEG_GSE151512_24h; DEG_GSE232624_EtOH0.25_CBD0.75_12h; DEG_GSE235310_Veh; DEG_GSE272113_CBD; DEG_GSE272113_sCBD
CALM1	9	7	DEG_GSE151512_12h; DEG_GSE151512_24h; DEG_GSE168797_Mock_CBD; DEG_GSE179661_HepG2; DEG_GSE179661_MHCC97H; DEG_GSE235310_Veh; DEG_GSE274859_LPS_24h	2	DEG_GSE131565; DEG_GSE261716_CBD0.2_2d
CANX	9	1	DEG_GSE261716_CBD10_28d	8	DEG_GSE131565; DEG_GSE168797_Mock_CBD; DEG_GSE168797_SARS_CBD; DEG_GSE201508_cGAMP; DEG_GSE201508_enthanol; DEG_GSE272113_CBD; DEG_GSE272113_sCBD; DEG_GSE274435_DMSO_24h
CAPN5	9	2	DEG_GSE151512_6h; DEG_GSE272113_sCBD	7	DEG_GSE168797_Mock_CBD; DEG_GSE168797_SARS_CBD; DEG_GSE168797_SARS_CBDV; DEG_GSE179661_HepG2; DEG_GSE179661_MHCC97H; DEG_GSE235310_LPS; DEG_GSE235310_Veh
CASP4	9	0	NA	9	DEG_GSE131565; DEG_GSE168797_Mock_CBD; DEG_GSE168797_SARS_CBD; DEG_GSE179661_MHCC97H; DEG_GSE232624_EtOH0.75_CBD0.75_6h; DEG_GSE235310_LPS; DEG_GSE272113_sCBD; DEG_GSE274435_DMSO_24h; DEG_GSE274859_LPS_24h
CASZ1	9	4	DEG_GSE151512_12h; DEG_GSE235310_LPS; DEG_GSE235310_Veh; DEG_GSE272113_sCBD	5	DEG_GSE131565; DEG_GSE151512_24h; DEG_GSE168797_Mock_CBD; DEG_GSE168797_SARS_CBD; DEG_GSE179661_MHCC97H
CAVIN2	9	9	DEG_GSE131565; DEG_GSE168797_Mock_CBD; DEG_GSE168797_SARS_CBD; DEG_GSE179661_HepG2; DEG_GSE179661_MHCC97H; DEG_GSE235310_LPS; DEG_GSE235310_Veh; DEG_GSE272113_CBD; DEG_GSE272113_sCBD	0	NA
CBX2	9	8	DEG_GSE131565; DEG_GSE151512_12h; DEG_GSE151512_24h; DEG_GSE151512_6h; DEG_GSE168797_Mock_CBD; DEG_GSE168797_SARS_CBD; DEG_GSE179661_MHCC97H; DEG_GSE201508_cGAMP	1	DEG_GSE274859_LPS_24h
CCDC85C	9	8	DEG_GSE151512_24h; DEG_GSE151512_6h; DEG_GSE168797_Mock_CBD; DEG_GSE168797_SARS_CBD; DEG_GSE235310_LPS; DEG_GSE261716_CBD0.2_28d; DEG_GSE261716_CBD20_28d; DEG_GSE274859_LPS_24h	1	DEG_GSE235310_Veh
CCNB1	9	9	DEG_GSE131565; DEG_GSE151512_12h; DEG_GSE151512_24h; DEG_GSE168797_Mock_CBD; DEG_GSE168797_SARS_CBD; DEG_GSE179661_HepG2; DEG_GSE179661_MHCC97H; DEG_GSE235310_Veh; DEG_GSE274859_LPS_24h	0	NA
CCND1	9	9	DEG_GSE131565; DEG_GSE151512_12h; DEG_GSE151512_24h; DEG_GSE151512_6h; DEG_GSE152088; DEG_GSE179661_HepG2; DEG_GSE179661_MHCC97H; DEG_GSE274859_LPS_24h; GSE70689_CBD_NoLPS	0	NA
CD44	9	5	DEG_GSE131565; DEG_GSE151512_12h; DEG_GSE261716_CBD0.2_2d; DEG_GSE272113_sCBD; DEG_GSE274859_LPS_24h	4	DEG_GSE179661_MHCC97H; DEG_GSE235310_LPS; DEG_GSE261716_CBD20_28d; DEG_GSE274435_DMSO_24h
CDC42EP1	9	3	DEG_GSE168797_Mock_CBD; DEG_GSE272113_CBD; DEG_GSE272113_sCBD	6	DEG_GSE151512_12h; DEG_GSE151512_24h; DEG_GSE151512_6h; DEG_GSE179661_HepG2; DEG_GSE179661_MHCC97H; DEG_GSE274435_DMSO_24h
CDC45	9	8	DEG_GSE131565; DEG_GSE151512_12h; DEG_GSE151512_24h; DEG_GSE168797_Mock_CBD; DEG_GSE168797_SARS_CBD; DEG_GSE179661_HepG2; DEG_GSE179661_MHCC97H; DEG_GSE274859_LPS_24h	1	DEG_GSE266113_WT
CDCA8	9	9	DEG_GSE131565; DEG_GSE151512_12h; DEG_GSE151512_24h; DEG_GSE151512_3h; DEG_GSE151512_6h; DEG_GSE168797_Mock_CBD; DEG_GSE168797_SARS_CBD; DEG_GSE179661_MHCC97H; DEG_GSE274859_LPS_24h	0	NA
CDK5	9	6	DEG_GSE131565; DEG_GSE151512_12h; DEG_GSE151512_24h; DEG_GSE179661_HepG2; DEG_GSE179661_MHCC97H; DEG_GSE201508_cGAMP	3	DEG_GSE235310_LPS; DEG_GSE261716_CBD0.2_2d; DEG_GSE274859_LPS_24h
CDK5RAP2	9	6	DEG_GSE151512_6h; DEG_GSE168797_Mock_CBD; DEG_GSE168797_SARS_CBD; DEG_GSE179661_HepG2; DEG_GSE179661_MHCC97H; DEG_GSE270378_CBD0.75_24h	3	DEG_GSE201508_cGAMP; DEG_GSE235310_Veh; DEG_GSE274859_LPS_24h
CDR2L	9	4	DEG_GSE151512_6h; DEG_GSE168797_Mock_CBD; DEG_GSE235310_LPS; DEG_GSE235310_Veh	5	DEG_GSE152088; DEG_GSE179661_HepG2; DEG_GSE179661_MHCC97H; DEG_GSE272113_CBD; DEG_GSE272113_sCBD
CDT1	9	4	DEG_GSE131565; DEG_GSE168797_Mock_CBD; DEG_GSE201508_cGAMP; DEG_GSE235310_LPS	5	DEG_GSE151512_24h; DEG_GSE179661_HepG2; DEG_GSE266113_WT; DEG_GSE272113_CBD; DEG_GSE272113_sCBD
CDYL	9	1	DEG_GSE152088	8	DEG_GSE131565; DEG_GSE168797_Mock_CBD; DEG_GSE168797_SARS_CBD; DEG_GSE179661_HepG2; DEG_GSE179661_MHCC97H; DEG_GSE235310_Veh; DEG_GSE274435_DMSO_24h; DEG_GSE274435_EtOH_24h
CEBPG	9	0	NA	9	DEG_GSE131565; DEG_GSE151512_24h; DEG_GSE151512_6h; DEG_GSE168797_Mock_CBD; DEG_GSE168797_SARS_CBD; DEG_GSE179661_HepG2; DEG_GSE179661_MHCC97H; DEG_GSE235310_Veh; DEG_GSE274859_LPS_24h
CELSR2	9	8	DEG_GSE151512_6h; DEG_GSE168797_Mock_CBD; DEG_GSE168797_SARS_CBD; DEG_GSE179661_HepG2; DEG_GSE179661_MHCC97H; DEG_GSE235310_LPS; DEG_GSE235310_Veh; DEG_GSE261716_CBD0.2_2d	1	DEG_GSE152088
CENPB	9	8	DEG_GSE131565; DEG_GSE151512_24h; DEG_GSE168797_Mock_CBD; DEG_GSE168797_SARS_CBD; DEG_GSE179661_MHCC97H; DEG_GSE201508_cGAMP; DEG_GSE235310_Veh; DEG_GSE261716_CBD20_2d	1	DEG_GSE272113_CBD
CENPH	9	5	DEG_GSE131565; DEG_GSE168797_Mock_CBD; DEG_GSE168797_SARS_CBD; DEG_GSE179661_HepG2; DEG_GSE179661_MHCC97H	4	DEG_GSE151512_24h; DEG_GSE151512_6h; DEG_GSE235310_LPS; DEG_GSE235310_Veh
CENPU	9	7	DEG_GSE131565; DEG_GSE151512_24h; DEG_GSE168797_Mock_CBD; DEG_GSE168797_SARS_CBD; DEG_GSE179661_HepG2; DEG_GSE235310_LPS; DEG_GSE235310_Veh	2	DEG_GSE201508_enthanol; DEG_GSE272113_CBD
CENPX	9	7	DEG_GSE131565; DEG_GSE151512_24h; DEG_GSE168797_Mock_CBD; DEG_GSE179661_MHCC97H; DEG_GSE201508_cGAMP; DEG_GSE235310_Veh; DEG_GSE274859_LPS_24h	2	DEG_GSE152088; DEG_GSE261716_CBD20_2d
CFAP36	9	3	DEG_GSE179661_HepG2; DEG_GSE272113_CBD; DEG_GSE272113_sCBD	6	DEG_GSE131565; DEG_GSE151512_12h; DEG_GSE168797_SARS_CBD; DEG_GSE179661_MHCC97H; DEG_GSE235310_LPS; DEG_GSE235310_Veh
CGREF1	9	6	DEG_GSE131565; DEG_GSE168797_SARS_CBDV; DEG_GSE272113_CBD; DEG_GSE272113_sCBD; DEG_GSE274435_DMSO_24h; DEG_GSE274435_EtOH_24h	3	DEG_GSE151512_12h; DEG_GSE261716_CBD0.2_28d; DEG_GSE261716_CBD20_28d
CHAF1A	9	7	DEG_GSE131565; DEG_GSE151512_24h; DEG_GSE168797_Mock_CBD; DEG_GSE168797_SARS_CBD; DEG_GSE179661_HepG2; DEG_GSE261716_CBD10_28d; DEG_GSE274859_LPS_24h	2	DEG_GSE266113_WT; DEG_GSE272113_CBD
CHKA	9	3	DEG_GSE261716_CBD0.2_28d; DEG_GSE261716_CBD10_28d; DEG_GSE261716_CBD20_28d	6	DEG_GSE179661_MHCC97H; DEG_GSE235310_LPS; DEG_GSE235310_Veh; DEG_GSE272113_CBD; DEG_GSE272113_sCBD; DEG_GSE274859_LPS_24h
CHST11	9	3	DEG_GSE131565; DEG_GSE201508_cGAMP; DEG_GSE274859_LPS_24h	6	DEG_GSE168797_Mock_CBD; DEG_GSE168797_SARS_CBD; DEG_GSE235310_LPS; DEG_GSE235310_Veh; DEG_GSE272113_CBD; DEG_GSE272113_sCBD
CKB	9	8	DEG_GSE131565; DEG_GSE151512_24h; DEG_GSE168797_Mock_CBD; DEG_GSE179661_HepG2; DEG_GSE235310_LPS; DEG_GSE272113_CBD; DEG_GSE272113_sCBD; GSE70689_CBD_wLPS	1	DEG_GSE152088
CKS2	9	5	DEG_GSE131565; DEG_GSE151512_12h; DEG_GSE168797_Mock_CBD; DEG_GSE168797_SARS_CBD; DEG_GSE274859_LPS_24h	4	DEG_GSE179661_HepG2; DEG_GSE179661_MHCC97H; DEG_GSE261716_CBD20_28d; DEG_GSE261716_CBD20_2d
CLN3	9	2	DEG_GSE232624_Veh_CBD0.75_12h; DEG_GSE232624_Veh_CBD3_12h	7	DEG_GSE131565; DEG_GSE168797_Mock_CBD; DEG_GSE168797_SARS_CBD; DEG_GSE179661_MHCC97H; DEG_GSE235310_LPS; DEG_GSE235310_Veh; DEG_GSE272113_sCBD
CLN6	9	6	DEG_GSE131565; DEG_GSE151512_24h; DEG_GSE168797_Mock_CBD; DEG_GSE168797_SARS_CBD; DEG_GSE179661_MHCC97H; DEG_GSE274859_LPS_24h	3	DEG_GSE235310_LPS; DEG_GSE235310_Veh; DEG_GSE266113_WT
CLSTN1	9	8	DEG_GSE131565; DEG_GSE151512_12h; DEG_GSE151512_24h; DEG_GSE168797_Mock_CBD; DEG_GSE168797_SARS_CBD; DEG_GSE179661_MHCC97H; DEG_GSE235310_LPS; DEG_GSE274859_LPS_24h	1	DEG_GSE272113_CBD
CMBL	9	5	DEG_GSE131565; DEG_GSE168797_Mock_CBD; DEG_GSE179661_MHCC97H; DEG_GSE272113_CBD; DEG_GSE272113_sCBD	4	DEG_GSE151512_24h; DEG_GSE261716_CBD0.2_28d; DEG_GSE261716_CBD20_28d; DEG_GSE261716_CBD20_2d
CMTM4	9	5	DEG_GSE168797_Mock_CBD; DEG_GSE168797_SARS_CBD; DEG_GSE179661_MHCC97H; DEG_GSE235310_LPS; DEG_GSE235310_Veh	4	DEG_GSE131565; DEG_GSE151512_24h; DEG_GSE272113_CBD; DEG_GSE272113_sCBD
CNKSR3	9	4	DEG_GSE232624_EtOH0.75_CBD0.75_6h; DEG_GSE232624_Veh_CBD3_12h; DEG_GSE235310_LPS; DEG_GSE235310_Veh	5	DEG_GSE131565; DEG_GSE151512_12h; DEG_GSE151512_24h; DEG_GSE179661_HepG2; DEG_GSE179661_MHCC97H
CNN3	9	8	DEG_GSE151512_12h; DEG_GSE151512_24h; DEG_GSE168797_Mock_CBD; DEG_GSE168797_SARS_CBD; DEG_GSE179661_HepG2; DEG_GSE235310_LPS; DEG_GSE272113_CBD; DEG_GSE272113_sCBD	1	DEG_GSE274435_DMSO_24h
CNNM4	9	1	DEG_GSE272113_sCBD	8	DEG_GSE131565; DEG_GSE168797_Mock_CBD; DEG_GSE168797_SARS_CBD; DEG_GSE168797_SARS_CBDV; DEG_GSE179661_HepG2; DEG_GSE179661_MHCC97H; DEG_GSE235310_LPS; DEG_GSE235310_Veh
CNP	9	8	DEG_GSE131565; DEG_GSE151512_12h; DEG_GSE151512_24h; DEG_GSE168797_Mock_CBD; DEG_GSE168797_SARS_CBD; DEG_GSE179661_HepG2; DEG_GSE201508_cGAMP; DEG_GSE261716_CBD0.2_28d	1	DEG_GSE235310_Veh
CNPY4	9	9	DEG_GSE131565; DEG_GSE151512_6h; DEG_GSE179661_HepG2; DEG_GSE179661_MHCC97H; DEG_GSE235310_Veh; DEG_GSE261716_CBD0.2_28d; DEG_GSE261716_CBD20_28d; DEG_GSE272113_CBD; DEG_GSE274859_LPS_24h	0	NA
COL1A1	9	7	DEG_GSE131565; DEG_GSE151512_6h; DEG_GSE232624_Veh_CBD3_12h; DEG_GSE235310_LPS; DEG_GSE261716_CBD0.2_28d; DEG_GSE261716_CBD20_28d; DEG_GSE272113_sCBD	2	DEG_GSE152088; DEG_GSE232624_EtOH0.25_CBD0.75_12h
COX19	9	4	DEG_GSE151512_12h; DEG_GSE179661_HepG2; DEG_GSE272113_CBD; DEG_GSE272113_sCBD	5	DEG_GSE131565; DEG_GSE168797_Mock_CBD; DEG_GSE168797_SARS_CBD; DEG_GSE179661_MHCC97H; DEG_GSE261716_CBD0.2_2d
CPEB2	9	4	DEG_GSE168797_SARS_CBD; DEG_GSE168797_SARS_CBDV; DEG_GSE261716_CBD0.2_2d; DEG_GSE272113_sCBD	5	DEG_GSE131565; DEG_GSE179661_HepG2; DEG_GSE179661_MHCC97H; DEG_GSE235310_Veh; DEG_GSE274859_LPS_24h
CPEB4	9	2	DEG_GSE168797_SARS_CBDV; DEG_GSE261716_CBD10_28d	7	DEG_GSE131565; DEG_GSE168797_Mock_CBD; DEG_GSE168797_Mock_CBDV; DEG_GSE179661_HepG2; DEG_GSE179661_MHCC97H; DEG_GSE201508_cGAMP; DEG_GSE274859_LPS_24h
CPLX2	9	8	DEG_GSE168797_Mock_CBD; DEG_GSE168797_SARS_CBD; DEG_GSE168797_SARS_CBDV; DEG_GSE179661_HepG2; DEG_GSE179661_MHCC97H; DEG_GSE261716_CBD0.2_28d; DEG_GSE272113_sCBD; DEG_GSE274435_DMSO_24h	1	DEG_GSE168797_Mock_CBDV
CPT1A	9	2	DEG_GSE201508_enthanol; DEG_GSE274859_LPS_24h	7	DEG_GSE131565; DEG_GSE151512_12h; DEG_GSE151512_24h; DEG_GSE151512_6h; DEG_GSE168797_Mock_CBD; DEG_GSE168797_SARS_CBD; DEG_GSE261716_CBD0.2_28d
CRELD1	9	2	DEG_GSE261716_CBD20_28d; DEG_GSE272113_CBD	7	DEG_GSE131565; DEG_GSE168797_Mock_CBD; DEG_GSE168797_SARS_CBD; DEG_GSE179661_HepG2; DEG_GSE179661_MHCC97H; DEG_GSE201508_cGAMP; DEG_GSE201508_enthanol
CRIP2	9	5	DEG_GSE131565; DEG_GSE168797_Mock_CBD; DEG_GSE168797_SARS_CBD; DEG_GSE261716_CBD20_28d; DEG_GSE272113_CBD	4	DEG_GSE152088; DEG_GSE179661_HepG2; DEG_GSE179661_MHCC97H; DEG_GSE232624_EtOH0.75_CBD0.75_6h
CROT	9	6	DEG_GSE131565; DEG_GSE151512_24h; DEG_GSE168797_Mock_CBD; DEG_GSE179661_HepG2; DEG_GSE179661_MHCC97H; DEG_GSE232624_Veh_CBD3_12h	3	DEG_GSE261716_CBD0.2_28d; DEG_GSE261716_CBD20_28d; DEG_GSE274859_LPS_24h
CSF2RA	9	4	DEG_GSE232624_EtOH0.75_CBD0.75_6h; DEG_GSE232624_Veh_CBD3_12h; DEG_GSE235310_LPS; DEG_GSE235310_Veh	5	DEG_GSE168797_Mock_CBD; DEG_GSE168797_SARS_CBD; DEG_GSE168797_SARS_CBDV; DEG_GSE261716_CBD20_28d; DEG_GSE274859_LPS_24h
CTPS2	9	6	DEG_GSE131565; DEG_GSE151512_24h; DEG_GSE179661_HepG2; DEG_GSE179661_MHCC97H; DEG_GSE235310_LPS; DEG_GSE235310_Veh	3	DEG_GSE168797_SARS_CBDV; DEG_GSE261716_CBD0.2_28d; DEG_GSE261716_CBD20_28d
CTSS	9	1	DEG_GSE261716_CBD0.2_2d	8	DEG_GSE168797_Mock_CBD; DEG_GSE168797_SARS_CBD; DEG_GSE168797_SARS_CBDV; DEG_GSE179661_MHCC97H; DEG_GSE201508_cGAMP; DEG_GSE201508_enthanol; DEG_GSE235310_LPS; DEG_GSE274859_LPS_24h
CUEDC1	9	7	DEG_GSE131565; DEG_GSE168797_SARS_CBD; DEG_GSE201508_cGAMP; DEG_GSE270378_CBD0.75_24h; DEG_GSE272113_CBD; DEG_GSE272113_sCBD; DEG_GSE274859_LPS_24h	2	DEG_GSE179661_HepG2; DEG_GSE235310_LPS
CXCL2	9	2	DEG_GSE168797_SARS_CBD; DEG_GSE168797_SARS_CBDV	7	DEG_GSE131565; DEG_GSE168797_Mock_CBD; DEG_GSE168797_Mock_CBDV; DEG_GSE179661_HepG2; DEG_GSE179661_MHCC97H; DEG_GSE261716_CBD20_28d; DEG_GSE261716_CBD20_2d
CXCR4	9	7	DEG_GSE151512_12h; DEG_GSE151512_24h; DEG_GSE151512_6h; DEG_GSE168797_Mock_CBD; DEG_GSE168797_SARS_CBD; DEG_GSE272113_CBD; DEG_GSE272113_sCBD	2	DEG_GSE235310_Veh; DEG_GSE274859_LPS_24h
CYB5B	9	5	DEG_GSE131565; DEG_GSE179661_HepG2; DEG_GSE179661_MHCC97H; DEG_GSE261716_CBD0.2_28d; DEG_GSE274859_LPS_24h	4	DEG_GSE151512_12h; DEG_GSE151512_24h; DEG_GSE168797_Mock_CBDV; DEG_GSE168797_SARS_CBD
CYLD	9	5	DEG_GSE151512_24h; DEG_GSE168797_SARS_CBDV; DEG_GSE201508_cGAMP; DEG_GSE235310_LPS; DEG_GSE274859_LPS_24h	4	DEG_GSE131565; DEG_GSE168797_Mock_CBD; DEG_GSE179661_HepG2; DEG_GSE179661_MHCC97H
DAG1	9	8	DEG_GSE151512_24h; DEG_GSE168797_Mock_CBD; DEG_GSE168797_SARS_CBD; DEG_GSE179661_HepG2; DEG_GSE179661_MHCC97H; DEG_GSE261716_CBD0.2_2d; DEG_GSE272113_sCBD; DEG_GSE274859_LPS_24h	1	DEG_GSE235310_Veh
DBI	9	4	DEG_GSE168797_Mock_CBD; DEG_GSE179661_HepG2; DEG_GSE179661_MHCC97H; DEG_GSE274859_LPS_24h	5	DEG_GSE168797_SARS_CBDV; DEG_GSE201508_enthanol; DEG_GSE261716_CBD0.2_2d; DEG_GSE261716_CBD20_2d; DEG_GSE272113_sCBD
DCK	9	7	DEG_GSE131565; DEG_GSE168797_Mock_CBD; DEG_GSE168797_SARS_CBD; DEG_GSE179661_HepG2; DEG_GSE235310_LPS; DEG_GSE274859_LPS_24h; GSE70689_CBD_NoLPS	2	DEG_GSE266113_WT; DEG_GSE272113_CBD
DCTPP1	9	8	DEG_GSE131565; DEG_GSE151512_24h; DEG_GSE168797_Mock_CBD; DEG_GSE179661_MHCC97H; DEG_GSE201508_cGAMP; DEG_GSE235310_LPS; DEG_GSE235310_Veh; DEG_GSE274859_LPS_24h	1	DEG_GSE266113_WT
DDAH2	9	6	DEG_GSE168797_Mock_CBD; DEG_GSE201508_cGAMP; DEG_GSE235310_LPS; DEG_GSE235310_Veh; DEG_GSE272113_CBD; DEG_GSE272113_sCBD	3	DEG_GSE131565; DEG_GSE179661_HepG2; DEG_GSE179661_MHCC97H
DDIAS	9	9	DEG_GSE131565; DEG_GSE151512_24h; DEG_GSE152088; DEG_GSE168797_Mock_CBD; DEG_GSE168797_SARS_CBD; DEG_GSE179661_HepG2; DEG_GSE235310_Veh; DEG_GSE272113_CBD; DEG_GSE272113_sCBD	0	NA
DDIT4L	9	2	DEG_GSE235310_LPS; DEG_GSE272113_CBD	7	DEG_GSE131565; DEG_GSE168797_Mock_CBD; DEG_GSE201508_cGAMP; DEG_GSE201508_enthanol; DEG_GSE235310_Veh; DEG_GSE274435_DMSO_24h; DEG_GSE274435_EtOH_24h
DDR2	9	2	DEG_GSE131565; DEG_GSE168797_SARS_CBDV	7	DEG_GSE151512_12h; DEG_GSE151512_24h; DEG_GSE151512_6h; DEG_GSE168797_Mock_CBD; DEG_GSE179661_MHCC97H; DEG_GSE274435_DMSO_24h; DEG_GSE274859_LPS_24h
DDX11	9	7	DEG_GSE131565; DEG_GSE168797_Mock_CBD; DEG_GSE168797_SARS_CBD; DEG_GSE179661_HepG2; DEG_GSE179661_MHCC97H; DEG_GSE261716_CBD20_28d; DEG_GSE274859_LPS_24h	2	DEG_GSE151512_12h; DEG_GSE266113_WT
DENND5B	9	4	DEG_GSE131565; DEG_GSE168797_Mock_CBD; DEG_GSE168797_SARS_CBD; DEG_GSE272113_sCBD	5	DEG_GSE151512_24h; DEG_GSE179661_HepG2; DEG_GSE179661_MHCC97H; DEG_GSE235310_Veh; DEG_GSE274859_LPS_24h
DERL2	9	1	DEG_GSE151512_24h	8	DEG_GSE131565; DEG_GSE168797_Mock_CBD; DEG_GSE168797_SARS_CBD; DEG_GSE179661_HepG2; DEG_GSE179661_MHCC97H; DEG_GSE201508_cGAMP; DEG_GSE201508_enthanol; DEG_GSE274859_LPS_24h
DGUOK	9	5	DEG_GSE151512_12h; DEG_GSE151512_24h; DEG_GSE179661_HepG2; DEG_GSE235310_LPS; DEG_GSE235310_Veh	4	DEG_GSE168797_Mock_CBD; DEG_GSE168797_SARS_CBD; DEG_GSE168797_SARS_CBDV; DEG_GSE179661_MHCC97H
DHFR	9	8	DEG_GSE131565; DEG_GSE151512_24h; DEG_GSE168797_Mock_CBD; DEG_GSE168797_SARS_CBD; DEG_GSE179661_HepG2; DEG_GSE179661_MHCC97H; DEG_GSE235310_LPS; DEG_GSE274859_LPS_24h	1	DEG_GSE235310_Veh
DHTKD1	9	7	DEG_GSE151512_12h; DEG_GSE151512_24h; DEG_GSE168797_Mock_CBD; DEG_GSE168797_SARS_CBD; DEG_GSE179661_HepG2; DEG_GSE235310_LPS; DEG_GSE235310_Veh	2	DEG_GSE179661_MHCC97H; DEG_GSE232624_EtOH0.25_CBD0.75_12h
DHX34	9	5	DEG_GSE131565; DEG_GSE151512_12h; DEG_GSE151512_24h; DEG_GSE261716_CBD20_28d; DEG_GSE274859_LPS_24h	4	DEG_GSE168797_Mock_CBD; DEG_GSE168797_SARS_CBD; DEG_GSE179661_HepG2; DEG_GSE179661_MHCC97H
DHX9	9	9	DEG_GSE131565; DEG_GSE151512_12h; DEG_GSE151512_24h; DEG_GSE168797_SARS_CBDV; DEG_GSE179661_HepG2; DEG_GSE179661_MHCC97H; DEG_GSE232624_EtOH0.25_CBD0.75_12h; DEG_GSE261716_CBD20_2d; DEG_GSE274859_LPS_24h	0	NA
DIO2	9	7	DEG_GSE151512_12h; DEG_GSE151512_6h; DEG_GSE168797_Mock_CBD; DEG_GSE168797_SARS_CBD; DEG_GSE232624_EtOH0.75_CBD0.75_6h; DEG_GSE272113_CBD; DEG_GSE272113_sCBD	2	DEG_GSE232624_EtOH0.25_CBD0.75_12h; DEG_GSE274859_LPS_24h
DKK3	9	6	DEG_GSE131565; DEG_GSE168797_Mock_CBD; DEG_GSE168797_SARS_CBD; DEG_GSE179661_MHCC97H; DEG_GSE272113_CBD; DEG_GSE272113_sCBD	3	DEG_GSE168797_SARS_CBDV; DEG_GSE179661_HepG2; DEG_GSE232624_Veh_CBD3_12h
DNAJB5	9	4	DEG_GSE131565; DEG_GSE261716_CBD20_28d; DEG_GSE272113_CBD; DEG_GSE272113_sCBD	5	DEG_GSE168797_SARS_CBD; DEG_GSE179661_HepG2; DEG_GSE179661_MHCC97H; DEG_GSE201508_cGAMP; DEG_GSE235310_LPS
DNAJC10	9	1	DEG_GSE152088	8	DEG_GSE131565; DEG_GSE151512_12h; DEG_GSE151512_24h; DEG_GSE168797_Mock_CBD; DEG_GSE168797_SARS_CBD; DEG_GSE235310_LPS; DEG_GSE261716_CBD20_28d; DEG_GSE274859_LPS_24h
DNAJC9	9	8	DEG_GSE131565; DEG_GSE151512_12h; DEG_GSE151512_24h; DEG_GSE168797_Mock_CBD; DEG_GSE168797_SARS_CBD; DEG_GSE201508_cGAMP; DEG_GSE235310_LPS; DEG_GSE274859_LPS_24h	1	DEG_GSE266113_WT
DNAL1	9	2	DEG_GSE232624_Veh_CBD3_12h; DEG_GSE270378_CBD0.75_6h	7	DEG_GSE131565; DEG_GSE151512_6h; DEG_GSE168797_Mock_CBD; DEG_GSE168797_SARS_CBD; DEG_GSE179661_MHCC97H; DEG_GSE235310_LPS; DEG_GSE235310_Veh
DNMT3B	9	5	DEG_GSE168797_Mock_CBD; DEG_GSE168797_SARS_CBD; DEG_GSE179661_HepG2; DEG_GSE235310_LPS; DEG_GSE261716_CBD20_28d	4	DEG_GSE131565; DEG_GSE201508_cGAMP; DEG_GSE272113_CBD; DEG_GSE272113_sCBD
DNTTIP2	9	3	DEG_GSE131565; DEG_GSE152088; DEG_GSE201508_cGAMP	6	DEG_GSE151512_6h; DEG_GSE168797_Mock_CBD; DEG_GSE179661_HepG2; DEG_GSE179661_MHCC97H; DEG_GSE261716_CBD0.2_28d; DEG_GSE261716_CBD20_28d
DOCK6	9	4	DEG_GSE168797_SARS_CBDV; DEG_GSE232624_EtOH0.75_CBD0.75_12h; DEG_GSE261716_CBD0.2_28d; DEG_GSE261716_CBD20_28d	5	DEG_GSE151512_12h; DEG_GSE151512_24h; DEG_GSE179661_MHCC97H; DEG_GSE235310_Veh; DEG_GSE266113_mutNdufs4
DOK3	9	6	DEG_GSE151512_12h; DEG_GSE151512_24h; DEG_GSE151512_3h; DEG_GSE151512_6h; DEG_GSE168797_Mock_CBD; DEG_GSE168797_SARS_CBD	3	DEG_GSE131565; DEG_GSE235310_LPS; DEG_GSE235310_Veh
DPP7	9	0	NA	9	DEG_GSE151512_12h; DEG_GSE152088; DEG_GSE168797_Mock_CBD; DEG_GSE168797_SARS_CBD; DEG_GSE261716_CBD0.2_2d; DEG_GSE270378_CBD0.75_24h; DEG_GSE272113_CBD; DEG_GSE272113_sCBD; DEG_GSE274859_LPS_24h
DSCC1	9	7	DEG_GSE131565; DEG_GSE168797_Mock_CBD; DEG_GSE168797_SARS_CBD; DEG_GSE179661_HepG2; DEG_GSE179661_MHCC97H; DEG_GSE201508_cGAMP; DEG_GSE274859_LPS_24h	2	DEG_GSE151512_24h; DEG_GSE151512_6h
DTL	9	8	DEG_GSE131565; DEG_GSE151512_12h; DEG_GSE151512_24h; DEG_GSE168797_Mock_CBD; DEG_GSE168797_SARS_CBD; DEG_GSE179661_HepG2; DEG_GSE179661_MHCC97H; DEG_GSE274859_LPS_24h	1	DEG_GSE266113_WT
DTX2	9	3	DEG_GSE168797_Mock_CBD; DEG_GSE168797_SARS_CBD; DEG_GSE179661_MHCC97H	6	DEG_GSE179661_HepG2; DEG_GSE235310_LPS; DEG_GSE235310_Veh; DEG_GSE272113_CBD; DEG_GSE272113_sCBD; DEG_GSE274859_LPS_24h
DTX4	9	6	DEG_GSE179661_HepG2; DEG_GSE179661_MHCC97H; DEG_GSE261716_CBD10_28d; DEG_GSE261716_CBD20_28d; DEG_GSE261716_CBD20_2d; DEG_GSE275998_CDB10	3	DEG_GSE235310_LPS; DEG_GSE235310_Veh; DEG_GSE274859_LPS_24h
DUSP8	9	5	DEG_GSE151512_12h; DEG_GSE151512_6h; DEG_GSE168797_SARS_CBD; DEG_GSE168797_SARS_CBDV; DEG_GSE261716_CBD20_28d	4	DEG_GSE179661_HepG2; DEG_GSE179661_MHCC97H; DEG_GSE274859_LPS_24h; GSE70689_CBD_wLPS
DYNC2I2	9	6	DEG_GSE131565; DEG_GSE151512_24h; DEG_GSE168797_Mock_CBD; DEG_GSE168797_SARS_CBD; DEG_GSE179661_MHCC97H; DEG_GSE201508_cGAMP	3	DEG_GSE152088; DEG_GSE235310_LPS; DEG_GSE235310_Veh
DZIP3	9	7	DEG_GSE131565; DEG_GSE151512_24h; DEG_GSE168797_Mock_CBD; DEG_GSE168797_SARS_CBD; DEG_GSE179661_HepG2; DEG_GSE179661_MHCC97H; DEG_GSE235310_LPS	2	DEG_GSE270378_CBD0.75_6h; DEG_GSE270378_CBD1.5_6h
E2F7	9	4	DEG_GSE151512_24h; DEG_GSE168797_Mock_CBD; DEG_GSE168797_SARS_CBD; DEG_GSE274859_LPS_24h	5	DEG_GSE131565; DEG_GSE179661_MHCC97H; DEG_GSE201508_cGAMP; DEG_GSE235310_LPS; DEG_GSE266113_WT
EDF1	9	4	DEG_GSE151512_24h; DEG_GSE201508_cGAMP; DEG_GSE235310_LPS; DEG_GSE272113_CBD	5	DEG_GSE131565; DEG_GSE168797_Mock_CBD; DEG_GSE168797_SARS_CBD; DEG_GSE179661_HepG2; DEG_GSE261716_CBD0.2_2d
EEA1	9	5	DEG_GSE131565; DEG_GSE152088; DEG_GSE168797_Mock_CBDV; DEG_GSE168797_SARS_CBD; DEG_GSE261716_CBD10_28d	4	DEG_GSE235310_LPS; DEG_GSE272113_CBD; DEG_GSE272113_sCBD; DEG_GSE274859_LPS_24h
EEPD1	9	1	DEG_GSE168797_Mock_CBDV	8	DEG_GSE151512_24h; DEG_GSE168797_Mock_CBD; DEG_GSE168797_SARS_CBDV; DEG_GSE179661_MHCC97H; DEG_GSE201508_cGAMP; DEG_GSE201508_enthanol; DEG_GSE235310_LPS; DEG_GSE235310_Veh
EGLN2	9	4	DEG_GSE168797_Mock_CBD; DEG_GSE168797_SARS_CBD; DEG_GSE235310_LPS; DEG_GSE261716_CBD20_28d	5	DEG_GSE152088; DEG_GSE179661_HepG2; DEG_GSE179661_MHCC97H; DEG_GSE201508_enthanol; DEG_GSE272113_CBD
EIF5	9	2	DEG_GSE151512_3h; DEG_GSE151512_6h	7	DEG_GSE131565; DEG_GSE168797_Mock_CBD; DEG_GSE168797_SARS_CBD; DEG_GSE179661_HepG2; DEG_GSE179661_MHCC97H; DEG_GSE235310_Veh; DEG_GSE274859_LPS_24h
ELL	9	4	DEG_GSE151512_24h; DEG_GSE168797_SARS_CBDV; DEG_GSE201508_cGAMP; DEG_GSE235310_Veh	5	DEG_GSE131565; DEG_GSE168797_Mock_CBD; DEG_GSE179661_HepG2; DEG_GSE179661_MHCC97H; DEG_GSE272113_CBD
ELL2	9	2	DEG_GSE168797_SARS_CBDV; DEG_GSE261716_CBD0.2_2d	7	DEG_GSE131565; DEG_GSE168797_Mock_CBD; DEG_GSE179661_HepG2; DEG_GSE179661_MHCC97H; DEG_GSE235310_Veh; DEG_GSE272113_CBD; DEG_GSE272113_sCBD
ELOVL1	9	1	DEG_GSE261716_CBD0.2_28d	8	DEG_GSE131565; DEG_GSE151512_12h; DEG_GSE151512_24h; DEG_GSE168797_Mock_CBD; DEG_GSE179661_HepG2; DEG_GSE201508_cGAMP; DEG_GSE201508_enthanol; DEG_GSE272113_sCBD
ELOVL5	9	2	DEG_GSE168797_Mock_CBD; DEG_GSE274859_LPS_24h	7	DEG_GSE151512_12h; DEG_GSE151512_24h; DEG_GSE151512_6h; DEG_GSE201508_cGAMP; DEG_GSE201508_enthanol; DEG_GSE235310_LPS; DEG_GSE261716_CBD0.2_28d
ENDOD1	9	8	DEG_GSE131565; DEG_GSE168797_Mock_CBD; DEG_GSE179661_HepG2; DEG_GSE179661_MHCC97H; DEG_GSE201508_cGAMP; DEG_GSE272113_CBD; DEG_GSE272113_sCBD; DEG_GSE274859_LPS_24h	1	DEG_GSE151512_24h
ENO2	9	1	DEG_GSE151512_24h	8	DEG_GSE131565; DEG_GSE168797_SARS_CBD; DEG_GSE168797_SARS_CBDV; DEG_GSE201508_cGAMP; DEG_GSE235310_LPS; DEG_GSE235310_Veh; DEG_GSE272113_CBD; DEG_GSE272113_sCBD
ENPP2	9	9	DEG_GSE131565; DEG_GSE151512_12h; DEG_GSE151512_24h; DEG_GSE151512_6h; DEG_GSE179661_HepG2; DEG_GSE179661_MHCC97H; DEG_GSE261716_CBD0.2_2d; DEG_GSE272113_CBD; DEG_GSE272113_sCBD	0	NA
EPHB3	9	5	DEG_GSE179661_MHCC97H; DEG_GSE235310_LPS; DEG_GSE266113_WT; DEG_GSE272113_CBD; DEG_GSE272113_sCBD	4	DEG_GSE131565; DEG_GSE151512_24h; DEG_GSE152088; DEG_GSE270378_CBD0.75_24h
EPHX2	9	4	DEG_GSE131565; DEG_GSE168797_Mock_CBD; DEG_GSE179661_HepG2; DEG_GSE179661_MHCC97H	5	DEG_GSE151512_24h; DEG_GSE261716_CBD0.2_28d; DEG_GSE261716_CBD0.2_2d; DEG_GSE261716_CBD10_28d; DEG_GSE261716_CBD20_28d
EPS8	9	0	NA	9	DEG_GSE131565; DEG_GSE168797_Mock_CBD; DEG_GSE168797_SARS_CBD; DEG_GSE179661_MHCC97H; DEG_GSE235310_LPS; DEG_GSE235310_Veh; DEG_GSE272113_CBD; DEG_GSE272113_sCBD; DEG_GSE274859_LPS_24h
ERFE	9	4	DEG_GSE131565; DEG_GSE272113_CBD; DEG_GSE272113_sCBD; DEG_GSE274859_LPS_24h	5	DEG_GSE151512_12h; DEG_GSE151512_24h; DEG_GSE179661_HepG2; DEG_GSE179661_MHCC97H; DEG_GSE235310_Veh
ERGIC1	9	5	DEG_GSE131565; DEG_GSE168797_Mock_CBD; DEG_GSE168797_SARS_CBD; DEG_GSE179661_MHCC97H; DEG_GSE235310_LPS	4	DEG_GSE235310_Veh; DEG_GSE272113_CBD; DEG_GSE272113_sCBD; DEG_GSE274859_LPS_24h
ERO1B	9	0	NA	9	DEG_GSE131565; DEG_GSE151512_12h; DEG_GSE151512_24h; DEG_GSE168797_Mock_CBD; DEG_GSE168797_SARS_CBD; DEG_GSE179661_HepG2; DEG_GSE179661_MHCC97H; DEG_GSE201508_cGAMP; DEG_GSE235310_LPS
ETFDH	9	5	DEG_GSE179661_HepG2; DEG_GSE232624_EtOH0.75_CBD0.75_6h; DEG_GSE232624_Veh_CBD3_12h; DEG_GSE272113_CBD; DEG_GSE272113_sCBD	4	DEG_GSE131565; DEG_GSE151512_24h; DEG_GSE168797_SARS_CBD; DEG_GSE261716_CBD0.2_28d
EVL	9	6	DEG_GSE131565; DEG_GSE168797_Mock_CBD; DEG_GSE168797_SARS_CBD; DEG_GSE179661_HepG2; DEG_GSE232624_Veh_CBD0.75_12h; DEG_GSE232624_Veh_CBD3_12h	3	DEG_GSE151512_24h; DEG_GSE232624_EtOH0.25_CBD0.75_12h; DEG_GSE235310_LPS
EXT1	9	5	DEG_GSE131565; DEG_GSE151512_12h; DEG_GSE151512_6h; DEG_GSE168797_Mock_CBDV; DEG_GSE235310_Veh	4	DEG_GSE168797_Mock_CBD; DEG_GSE179661_HepG2; DEG_GSE179661_MHCC97H; DEG_GSE272113_CBD
FADS3	9	0	NA	9	DEG_GSE131565; DEG_GSE151512_12h; DEG_GSE151512_24h; DEG_GSE152088; DEG_GSE168797_Mock_CBD; DEG_GSE179661_HepG2; DEG_GSE179661_MHCC97H; DEG_GSE201508_cGAMP; DEG_GSE201508_enthanol
FAM102A	9	1	DEG_GSE179661_MHCC97H	8	DEG_GSE131565; DEG_GSE151512_12h; DEG_GSE168797_Mock_CBD; DEG_GSE168797_SARS_CBD; DEG_GSE168797_SARS_CBDV; DEG_GSE179661_HepG2; DEG_GSE232624_Veh_CBD3_6h; DEG_GSE235310_Veh
FAM111A	9	6	DEG_GSE168797_Mock_CBD; DEG_GSE168797_SARS_CBD; DEG_GSE179661_HepG2; DEG_GSE179661_MHCC97H; DEG_GSE261716_CBD0.2_2d; DEG_GSE274859_LPS_24h	3	DEG_GSE235310_LPS; DEG_GSE261716_CBD20_28d; DEG_GSE266113_WT
FAM120A	9	6	DEG_GSE131565; DEG_GSE151512_24h; DEG_GSE151512_6h; DEG_GSE168797_Mock_CBD; DEG_GSE168797_SARS_CBD; DEG_GSE179661_MHCC97H	3	DEG_GSE235310_LPS; DEG_GSE272113_CBD; DEG_GSE272113_sCBD
FAM135A	9	3	DEG_GSE168797_SARS_CBDV; DEG_GSE235310_LPS; DEG_GSE272113_sCBD	6	DEG_GSE131565; DEG_GSE151512_12h; DEG_GSE151512_24h; DEG_GSE168797_Mock_CBD; DEG_GSE179661_MHCC97H; DEG_GSE274859_LPS_24h
FAM214B	9	1	DEG_GSE272113_sCBD	8	DEG_GSE131565; DEG_GSE151512_24h; DEG_GSE168797_Mock_CBD; DEG_GSE168797_SARS_CBD; DEG_GSE179661_HepG2; DEG_GSE179661_MHCC97H; DEG_GSE201508_cGAMP; DEG_GSE235310_LPS
FAM219A	9	2	DEG_GSE151512_24h; DEG_GSE151512_6h	7	DEG_GSE131565; DEG_GSE168797_Mock_CBD; DEG_GSE168797_SARS_CBD; DEG_GSE179661_HepG2; DEG_GSE179661_MHCC97H; DEG_GSE201508_cGAMP; DEG_GSE274859_LPS_24h
FAM83G	9	4	DEG_GSE168797_SARS_CBDV; DEG_GSE235310_LPS; DEG_GSE261716_CBD0.2_28d; DEG_GSE261716_CBD20_28d	5	DEG_GSE131565; DEG_GSE151512_24h; DEG_GSE168797_Mock_CBD; DEG_GSE179661_HepG2; DEG_GSE179661_MHCC97H
FBXO10	9	3	DEG_GSE151512_24h; DEG_GSE151512_6h; DEG_GSE235310_LPS	6	DEG_GSE131565; DEG_GSE168797_Mock_CBD; DEG_GSE168797_SARS_CBD; DEG_GSE179661_MHCC97H; DEG_GSE201508_cGAMP; DEG_GSE235310_Veh
FEM1A	9	7	DEG_GSE151512_24h; DEG_GSE168797_SARS_CBD; DEG_GSE179661_MHCC97H; DEG_GSE232624_Veh_CBD0.75_12h; DEG_GSE232624_Veh_CBD3_12h; DEG_GSE272113_sCBD; DEG_GSE274859_LPS_24h	2	DEG_GSE179661_HepG2; DEG_GSE232624_EtOH0.25_CBD0.75_12h
FGF2	9	2	DEG_GSE168797_Mock_CBDV; DEG_GSE266113_WT	7	DEG_GSE131565; DEG_GSE168797_Mock_CBD; DEG_GSE168797_SARS_CBD; DEG_GSE168797_SARS_CBDV; DEG_GSE179661_HepG2; DEG_GSE179661_MHCC97H; DEG_GSE274859_LPS_24h
FGFR4	9	7	DEG_GSE131565; DEG_GSE168797_Mock_CBD; DEG_GSE168797_SARS_CBD; DEG_GSE179661_MHCC97H; DEG_GSE261716_CBD0.2_28d; DEG_GSE261716_CBD20_28d; DEG_GSE272113_CBD	2	DEG_GSE151512_12h; DEG_GSE151512_24h
FHOD1	9	5	DEG_GSE131565; DEG_GSE168797_Mock_CBD; DEG_GSE179661_MHCC97H; DEG_GSE235310_Veh; DEG_GSE274859_LPS_24h	4	DEG_GSE151512_24h; DEG_GSE235310_LPS; DEG_GSE272113_CBD; DEG_GSE272113_sCBD
FKBP3	9	7	DEG_GSE131565; DEG_GSE151512_24h; DEG_GSE168797_Mock_CBD; DEG_GSE179661_HepG2; DEG_GSE179661_MHCC97H; DEG_GSE272113_CBD; DEG_GSE274859_LPS_24h	2	DEG_GSE168797_SARS_CBDV; DEG_GSE261716_CBD0.2_2d
FLCN	9	0	NA	9	DEG_GSE131565; DEG_GSE168797_Mock_CBD; DEG_GSE179661_HepG2; DEG_GSE179661_MHCC97H; DEG_GSE235310_LPS; DEG_GSE235310_Veh; DEG_GSE272113_CBD; DEG_GSE272113_sCBD; DEG_GSE274859_LPS_24h
FLVCR1	9	3	DEG_GSE131565; DEG_GSE179661_HepG2; DEG_GSE235310_LPS	6	DEG_GSE151512_12h; DEG_GSE151512_24h; DEG_GSE168797_SARS_CBD; DEG_GSE272113_CBD; DEG_GSE272113_sCBD; DEG_GSE274859_LPS_24h
FNDC3B	9	1	DEG_GSE261716_CBD0.2_2d	8	DEG_GSE131565; DEG_GSE151512_24h; DEG_GSE168797_SARS_CBD; DEG_GSE179661_MHCC97H; DEG_GSE201508_cGAMP; DEG_GSE235310_LPS; DEG_GSE235310_Veh; DEG_GSE272113_CBD
FOSL1	9	4	DEG_GSE152088; DEG_GSE168797_Mock_CBDV; DEG_GSE201508_cGAMP; DEG_GSE201508_enthanol	5	DEG_GSE131565; DEG_GSE168797_Mock_CBD; DEG_GSE179661_HepG2; DEG_GSE235310_LPS; DEG_GSE266113_WT
FOXM1	9	9	DEG_GSE131565; DEG_GSE151512_12h; DEG_GSE151512_24h; DEG_GSE151512_6h; DEG_GSE168797_Mock_CBD; DEG_GSE168797_SARS_CBD; DEG_GSE179661_HepG2; DEG_GSE179661_MHCC97H; DEG_GSE274859_LPS_24h	0	NA
FOXN2	9	2	DEG_GSE235310_LPS; DEG_GSE274859_LPS_24h	7	DEG_GSE151512_24h; DEG_GSE168797_Mock_CBD; DEG_GSE179661_HepG2; DEG_GSE179661_MHCC97H; DEG_GSE272113_CBD; DEG_GSE272113_sCBD; DEG_GSE274435_DMSO_24h
FOXN3	9	6	DEG_GSE131565; DEG_GSE179661_HepG2; DEG_GSE261716_CBD0.2_28d; DEG_GSE261716_CBD0.2_2d; DEG_GSE261716_CBD20_2d; DEG_GSE272113_CBD	3	DEG_GSE151512_24h; DEG_GSE179661_MHCC97H; DEG_GSE232624_EtOH0.25_CBD0.75_12h
FOXO1	9	6	DEG_GSE168797_SARS_CBDV; DEG_GSE235310_LPS; DEG_GSE261716_CBD20_28d; DEG_GSE261716_CBD20_2d; DEG_GSE272113_CBD; DEG_GSE272113_sCBD	3	DEG_GSE151512_24h; DEG_GSE168797_Mock_CBD; DEG_GSE179661_MHCC97H
FOXO3	9	3	DEG_GSE151512_12h; DEG_GSE151512_24h; DEG_GSE151512_6h	6	DEG_GSE131565; DEG_GSE168797_Mock_CBD; DEG_GSE179661_HepG2; DEG_GSE179661_MHCC97H; DEG_GSE201508_cGAMP; DEG_GSE235310_Veh
FRMD8	9	5	DEG_GSE151512_24h; DEG_GSE179661_MHCC97H; DEG_GSE232624_EtOH0.25_CBD0.75_12h; DEG_GSE235310_LPS; DEG_GSE235310_Veh	4	DEG_GSE131565; DEG_GSE179661_HepG2; DEG_GSE232624_Veh_CBD0.75_12h; DEG_GSE272113_CBD
FXR1	9	4	DEG_GSE235310_LPS; DEG_GSE272113_CBD; DEG_GSE272113_sCBD; DEG_GSE274859_LPS_24h	5	DEG_GSE151512_24h; DEG_GSE151512_6h; DEG_GSE168797_SARS_CBD; DEG_GSE179661_MHCC97H; DEG_GSE201508_cGAMP
G6PD	9	3	DEG_GSE131565; DEG_GSE168797_Mock_CBD; DEG_GSE179661_MHCC97H	6	DEG_GSE151512_24h; DEG_GSE168797_SARS_CBDV; DEG_GSE235310_LPS; DEG_GSE235310_Veh; DEG_GSE272113_CBD; DEG_GSE272113_sCBD
GABARAPL2	9	5	DEG_GSE168797_Mock_CBD; DEG_GSE179661_HepG2; DEG_GSE235310_LPS; DEG_GSE235310_Veh; DEG_GSE272113_CBD	4	DEG_GSE131565; DEG_GSE179661_MHCC97H; DEG_GSE201508_enthanol; DEG_GSE261716_CBD10_28d
GALE	9	3	DEG_GSE151512_24h; DEG_GSE179661_MHCC97H; DEG_GSE274859_LPS_24h	6	DEG_GSE168797_Mock_CBD; DEG_GSE168797_SARS_CBD; DEG_GSE179661_HepG2; DEG_GSE235310_LPS; DEG_GSE266113_WT; DEG_GSE272113_CBD
GAMT	9	8	DEG_GSE131565; DEG_GSE151512_24h; DEG_GSE168797_Mock_CBD; DEG_GSE179661_MHCC97H; DEG_GSE261716_CBD0.2_28d; DEG_GSE261716_CBD20_28d; DEG_GSE272113_CBD; DEG_GSE272113_sCBD	1	DEG_GSE152088
GAREM1	9	2	DEG_GSE151512_3h; DEG_GSE261716_CBD0.2_2d	7	DEG_GSE131565; DEG_GSE151512_12h; DEG_GSE151512_24h; DEG_GSE168797_Mock_CBD; DEG_GSE168797_SARS_CBD; DEG_GSE179661_HepG2; DEG_GSE179661_MHCC97H
GAS2L3	9	2	DEG_GSE168797_Mock_CBD; DEG_GSE168797_SARS_CBD	7	DEG_GSE131565; DEG_GSE151512_24h; DEG_GSE179661_MHCC97H; DEG_GSE201508_cGAMP; DEG_GSE235310_LPS; DEG_GSE272113_CBD; DEG_GSE274859_LPS_24h
GCHFR	9	4	DEG_GSE179661_MHCC97H; DEG_GSE266113_WT; DEG_GSE272113_CBD; DEG_GSE274859_LPS_24h	5	DEG_GSE131565; DEG_GSE152088; DEG_GSE235310_LPS; DEG_GSE235310_Veh; DEG_GSE261716_CBD0.2_2d
GM2A	9	4	DEG_GSE131565; DEG_GSE151512_24h; DEG_GSE179661_HepG2; DEG_GSE274859_LPS_24h	5	DEG_GSE168797_SARS_CBDV; DEG_GSE201508_cGAMP; DEG_GSE201508_enthanol; DEG_GSE235310_LPS; DEG_GSE235310_Veh
GNAI1	9	5	DEG_GSE131565; DEG_GSE151512_12h; DEG_GSE168797_SARS_CBDV; DEG_GSE201508_enthanol; DEG_GSE235310_Veh	4	DEG_GSE168797_Mock_CBD; DEG_GSE179661_HepG2; DEG_GSE179661_MHCC97H; DEG_GSE261716_CBD20_28d
GNL3	9	3	DEG_GSE131565; DEG_GSE152088; DEG_GSE235310_Veh	6	DEG_GSE168797_SARS_CBD; DEG_GSE179661_MHCC97H; DEG_GSE261716_CBD20_28d; DEG_GSE261716_CBD20_2d; DEG_GSE272113_CBD; DEG_GSE272113_sCBD
GOLIM4	9	5	DEG_GSE131565; DEG_GSE168797_Mock_CBD; DEG_GSE179661_HepG2; DEG_GSE179661_MHCC97H; DEG_GSE261716_CBD10_28d	4	DEG_GSE168797_Mock_CBDV; DEG_GSE232624_Veh_CBD3_6h; DEG_GSE235310_LPS; DEG_GSE274859_LPS_24h
GOLM1	9	8	DEG_GSE131565; DEG_GSE151512_12h; DEG_GSE151512_24h; DEG_GSE151512_6h; DEG_GSE168797_Mock_CBD; DEG_GSE168797_SARS_CBD; DEG_GSE179661_MHCC97H; DEG_GSE274859_LPS_24h	1	DEG_GSE272113_CBD
GPAM	9	9	DEG_GSE151512_12h; DEG_GSE151512_24h; DEG_GSE151512_6h; DEG_GSE168797_Mock_CBD; DEG_GSE168797_SARS_CBD; DEG_GSE179661_HepG2; DEG_GSE179661_MHCC97H; DEG_GSE201508_cGAMP; DEG_GSE274859_LPS_24h	0	NA
GPAT3	9	1	DEG_GSE168797_Mock_CBDV	8	DEG_GSE131565; DEG_GSE168797_Mock_CBD; DEG_GSE168797_SARS_CBD; DEG_GSE168797_SARS_CBDV; DEG_GSE179661_HepG2; DEG_GSE235310_LPS; DEG_GSE261716_CBD0.2_28d; DEG_GSE274859_LPS_24h
GPBP1	9	4	DEG_GSE168797_SARS_CBDV; DEG_GSE235310_LPS; DEG_GSE272113_CBD; DEG_GSE272113_sCBD	5	DEG_GSE131565; DEG_GSE168797_Mock_CBD; DEG_GSE179661_HepG2; DEG_GSE179661_MHCC97H; DEG_GSE274859_LPS_24h
GPR137B	9	0	NA	9	DEG_GSE131565; DEG_GSE151512_24h; DEG_GSE151512_6h; DEG_GSE179661_HepG2; DEG_GSE179661_MHCC97H; DEG_GSE201508_cGAMP; DEG_GSE272113_CBD; DEG_GSE272113_sCBD; DEG_GSE274859_LPS_24h
GPR35	9	2	DEG_GSE179661_MHCC97H; DEG_GSE201508_cGAMP	7	DEG_GSE131565; DEG_GSE168797_Mock_CBD; DEG_GSE179661_HepG2; DEG_GSE235310_LPS; DEG_GSE272113_CBD; DEG_GSE272113_sCBD; DEG_GSE274859_LPS_24h
GSN	9	9	DEG_GSE168797_Mock_CBD; DEG_GSE201508_cGAMP; DEG_GSE201508_enthanol; DEG_GSE235310_LPS; DEG_GSE235310_Veh; DEG_GSE266113_WT; DEG_GSE272113_CBD; DEG_GSE272113_sCBD; DEG_GSE274859_LPS_24h	0	NA
GTF2H3	9	3	DEG_GSE131565; DEG_GSE179661_HepG2; DEG_GSE179661_MHCC97H	6	DEG_GSE168797_Mock_CBD; DEG_GSE168797_SARS_CBD; DEG_GSE235310_LPS; DEG_GSE235310_Veh; DEG_GSE261716_CBD20_2d; DEG_GSE272113_CBD
GTF2I	9	8	DEG_GSE131565; DEG_GSE151512_24h; DEG_GSE168797_Mock_CBD; DEG_GSE168797_SARS_CBD; DEG_GSE179661_HepG2; DEG_GSE179661_MHCC97H; DEG_GSE261716_CBD20_28d; DEG_GSE272113_sCBD	1	DEG_GSE235310_LPS
GYS1	9	7	DEG_GSE131565; DEG_GSE151512_12h; DEG_GSE151512_24h; DEG_GSE179661_HepG2; DEG_GSE179661_MHCC97H; DEG_GSE235310_Veh; DEG_GSE274435_DMSO_4h	2	DEG_GSE272113_CBD; DEG_GSE272113_sCBD
H2AX	9	8	DEG_GSE131565; DEG_GSE151512_12h; DEG_GSE151512_24h; DEG_GSE168797_Mock_CBD; DEG_GSE179661_MHCC97H; DEG_GSE201508_cGAMP; DEG_GSE235310_LPS; DEG_GSE235310_Veh	1	DEG_GSE232624_Veh_CBD3_12h
HACD1	9	6	DEG_GSE131565; DEG_GSE168797_Mock_CBD; DEG_GSE179661_HepG2; DEG_GSE272113_CBD; DEG_GSE272113_sCBD; DEG_GSE274859_LPS_24h	3	DEG_GSE151512_12h; DEG_GSE151512_24h; DEG_GSE232624_Veh_CBD3_12h
HACD3	9	6	DEG_GSE131565; DEG_GSE151512_12h; DEG_GSE168797_Mock_CBD; DEG_GSE179661_HepG2; DEG_GSE179661_MHCC97H; DEG_GSE274859_LPS_24h	3	DEG_GSE235310_LPS; DEG_GSE261716_CBD0.2_28d; DEG_GSE261716_CBD0.2_2d
HADH	9	8	DEG_GSE131565; DEG_GSE151512_12h; DEG_GSE151512_24h; DEG_GSE168797_Mock_CBD; DEG_GSE168797_SARS_CBD; DEG_GSE179661_HepG2; DEG_GSE179661_MHCC97H; DEG_GSE201508_enthanol	1	DEG_GSE272113_sCBD
HARS2	9	7	DEG_GSE131565; DEG_GSE151512_12h; DEG_GSE151512_24h; DEG_GSE179661_MHCC97H; DEG_GSE235310_LPS; DEG_GSE235310_Veh; DEG_GSE261716_CBD20_28d	2	DEG_GSE179661_HepG2; DEG_GSE274859_LPS_24h
HDAC7	9	6	DEG_GSE131565; DEG_GSE168797_Mock_CBD; DEG_GSE168797_SARS_CBD; DEG_GSE201508_cGAMP; DEG_GSE261716_CBD20_28d; DEG_GSE274859_LPS_24h	3	DEG_GSE151512_12h; DEG_GSE179661_HepG2; DEG_GSE232624_EtOH0.75_CBD0.75_6h
HDHD3	9	2	DEG_GSE179661_MHCC97H; DEG_GSE235310_LPS	7	DEG_GSE131565; DEG_GSE151512_24h; DEG_GSE168797_Mock_CBD; DEG_GSE168797_SARS_CBD; DEG_GSE168797_SARS_CBDV; DEG_GSE179661_HepG2; DEG_GSE261716_CBD0.2_2d
HELZ2	9	4	DEG_GSE131565; DEG_GSE151512_6h; DEG_GSE201508_cGAMP; DEG_GSE201508_enthanol	5	DEG_GSE179661_HepG2; DEG_GSE179661_MHCC97H; DEG_GSE235310_Veh; DEG_GSE272113_CBD; DEG_GSE274859_LPS_24h
HERC4	9	5	DEG_GSE151512_3h; DEG_GSE168797_Mock_CBD; DEG_GSE168797_SARS_CBD; DEG_GSE272113_CBD; DEG_GSE274859_LPS_24h	4	DEG_GSE151512_24h; DEG_GSE179661_HepG2; DEG_GSE179661_MHCC97H; DEG_GSE201508_cGAMP
HMGB1	9	8	DEG_GSE131565; DEG_GSE151512_12h; DEG_GSE151512_24h; DEG_GSE168797_Mock_CBD; DEG_GSE179661_HepG2; DEG_GSE179661_MHCC97H; DEG_GSE235310_Veh; DEG_GSE274859_LPS_24h	1	DEG_GSE261716_CBD0.2_2d
HMGCL	9	2	DEG_GSE272113_CBD; DEG_GSE274859_LPS_24h	7	DEG_GSE131565; DEG_GSE168797_Mock_CBD; DEG_GSE168797_SARS_CBD; DEG_GSE261716_CBD0.2_2d; DEG_GSE261716_CBD10_28d; DEG_GSE261716_CBD20_28d; DEG_GSE261716_CBD20_2d
HNRNPA0	9	7	DEG_GSE131565; DEG_GSE151512_12h; DEG_GSE151512_24h; DEG_GSE168797_Mock_CBD; DEG_GSE168797_SARS_CBD; DEG_GSE201508_cGAMP; DEG_GSE274859_LPS_24h	2	DEG_GSE152088; DEG_GSE179661_HepG2
HNRNPA2B1	9	9	DEG_GSE131565; DEG_GSE151512_12h; DEG_GSE151512_24h; DEG_GSE168797_Mock_CBD; DEG_GSE168797_SARS_CBD; DEG_GSE179661_HepG2; DEG_GSE179661_MHCC97H; DEG_GSE235310_Veh; DEG_GSE274859_LPS_24h	0	NA
HNRNPDL	9	8	DEG_GSE131565; DEG_GSE151512_12h; DEG_GSE151512_24h; DEG_GSE168797_Mock_CBD; DEG_GSE168797_SARS_CBD; DEG_GSE201508_cGAMP; DEG_GSE201508_enthanol; DEG_GSE235310_LPS	1	DEG_GSE179661_MHCC97H
HNRNPM	9	9	DEG_GSE131565; DEG_GSE151512_12h; DEG_GSE151512_24h; DEG_GSE151512_6h; DEG_GSE168797_Mock_CBD; DEG_GSE179661_MHCC97H; DEG_GSE201508_enthanol; DEG_GSE235310_LPS; DEG_GSE235310_Veh	0	NA
HNRNPU	9	7	DEG_GSE131565; DEG_GSE151512_12h; DEG_GSE151512_24h; DEG_GSE168797_Mock_CBD; DEG_GSE261716_CBD10_28d; DEG_GSE270378_CBD0.325_24h; DEG_GSE274859_LPS_24h	2	DEG_GSE201508_cGAMP; DEG_GSE272113_CBD
HS6ST1	9	3	DEG_GSE131565; DEG_GSE168797_Mock_CBD; DEG_GSE274435_DMSO_24h	6	DEG_GSE151512_12h; DEG_GSE152088; DEG_GSE235310_LPS; DEG_GSE235310_Veh; DEG_GSE272113_CBD; DEG_GSE272113_sCBD
HSD17B14	9	1	DEG_GSE168797_Mock_CBDV	8	DEG_GSE131565; DEG_GSE151512_24h; DEG_GSE168797_Mock_CBD; DEG_GSE168797_SARS_CBD; DEG_GSE179661_MHCC97H; DEG_GSE235310_LPS; DEG_GSE235310_Veh; DEG_GSE274859_LPS_24h
HSP90AB1	9	4	DEG_GSE131565; DEG_GSE152088; DEG_GSE235310_Veh; DEG_GSE274859_LPS_24h	5	DEG_GSE168797_SARS_CBD; DEG_GSE179661_HepG2; DEG_GSE179661_MHCC97H; DEG_GSE201508_cGAMP; DEG_GSE266113_WT
HSPA6	9	2	DEG_GSE168797_SARS_CBDV; DEG_GSE235310_Veh	7	DEG_GSE131565; DEG_GSE168797_Mock_CBD; DEG_GSE168797_SARS_CBD; DEG_GSE179661_HepG2; DEG_GSE179661_MHCC97H; DEG_GSE201508_cGAMP; DEG_GSE235310_LPS
HTRA1	9	6	DEG_GSE131565; DEG_GSE168797_Mock_CBD; DEG_GSE168797_SARS_CBD; DEG_GSE179661_MHCC97H; DEG_GSE272113_CBD; DEG_GSE274435_EtOH_24h	3	DEG_GSE151512_24h; DEG_GSE168797_SARS_CBDV; DEG_GSE274859_LPS_24h
ID2	9	5	DEG_GSE168797_Mock_CBD; DEG_GSE179661_MHCC97H; DEG_GSE235310_LPS; DEG_GSE272113_CBD; DEG_GSE272113_sCBD	4	DEG_GSE151512_24h; DEG_GSE235310_Veh; DEG_GSE261716_CBD20_2d; DEG_GSE274859_LPS_24h
IDH2	9	8	DEG_GSE151512_12h; DEG_GSE151512_24h; DEG_GSE168797_Mock_CBD; DEG_GSE168797_SARS_CBD; DEG_GSE201508_cGAMP; DEG_GSE235310_Veh; DEG_GSE272113_CBD; DEG_GSE274859_LPS_24h	1	DEG_GSE235310_LPS
IER2	9	4	DEG_GSE168797_SARS_CBD; DEG_GSE168797_SARS_CBDV; DEG_GSE235310_LPS; DEG_GSE274859_LPS_24h	5	DEG_GSE131565; DEG_GSE152088; DEG_GSE179661_HepG2; DEG_GSE179661_MHCC97H; DEG_GSE272113_sCBD
IFIH1	9	4	DEG_GSE131565; DEG_GSE152088; DEG_GSE179661_HepG2; DEG_GSE201508_cGAMP	5	DEG_GSE168797_Mock_CBD; DEG_GSE168797_SARS_CBD; DEG_GSE179661_MHCC97H; DEG_GSE235310_Veh; DEG_GSE274859_LPS_24h
IFIT2	9	4	DEG_GSE131565; DEG_GSE152088; DEG_GSE201508_cGAMP; DEG_GSE232624_EtOH0.75_CBD0.75_12h	5	DEG_GSE168797_Mock_CBD; DEG_GSE168797_SARS_CBD; DEG_GSE179661_MHCC97H; DEG_GSE235310_LPS; DEG_GSE235310_Veh
IFNGR1	9	2	DEG_GSE179661_MHCC97H; DEG_GSE274859_LPS_24h	7	DEG_GSE131565; DEG_GSE168797_Mock_CBD; DEG_GSE168797_SARS_CBD; DEG_GSE201508_cGAMP; DEG_GSE201508_enthanol; DEG_GSE235310_LPS; DEG_GSE235310_Veh
IGF2BP3	9	6	DEG_GSE131565; DEG_GSE151512_24h; DEG_GSE152088; DEG_GSE168797_SARS_CBD; DEG_GSE179661_HepG2; DEG_GSE179661_MHCC97H	3	DEG_GSE235310_LPS; DEG_GSE235310_Veh; DEG_GSE274859_LPS_24h
IGFBP3	9	2	DEG_GSE168797_Mock_CBD; DEG_GSE235310_LPS	7	DEG_GSE151512_6h; DEG_GSE168797_Mock_CBDV; DEG_GSE179661_HepG2; DEG_GSE179661_MHCC97H; DEG_GSE232624_Veh_CBD3_12h; DEG_GSE274435_DMSO_24h; DEG_GSE275998_CDB20
IGSF8	9	7	DEG_GSE151512_12h; DEG_GSE151512_24h; DEG_GSE151512_6h; DEG_GSE201508_cGAMP; DEG_GSE261716_CBD20_28d; DEG_GSE266113_WT; DEG_GSE274859_LPS_24h	2	DEG_GSE179661_HepG2; DEG_GSE179661_MHCC97H
IL13RA1	9	6	DEG_GSE168797_Mock_CBD; DEG_GSE179661_HepG2; DEG_GSE179661_MHCC97H; DEG_GSE235310_LPS; DEG_GSE235310_Veh; DEG_GSE274859_LPS_24h	3	DEG_GSE131565; DEG_GSE272113_CBD; DEG_GSE272113_sCBD
IL16	9	6	DEG_GSE131565; DEG_GSE168797_SARS_CBD; DEG_GSE168797_SARS_CBDV; DEG_GSE235310_Veh; DEG_GSE272113_CBD; DEG_GSE272113_sCBD	3	DEG_GSE274859_LPS_24h; GSE70689_CBD_NoLPS; GSE70689_CBD_wLPS
IL6R	9	4	DEG_GSE168797_Mock_CBDV; DEG_GSE201508_cGAMP; DEG_GSE235310_LPS; DEG_GSE274859_LPS_24h	5	DEG_GSE131565; DEG_GSE152088; DEG_GSE168797_Mock_CBD; DEG_GSE179661_HepG2; DEG_GSE261716_CBD0.2_28d
ILK	9	7	DEG_GSE131565; DEG_GSE151512_12h; DEG_GSE151512_24h; DEG_GSE168797_SARS_CBD; DEG_GSE201508_cGAMP; DEG_GSE272113_CBD; DEG_GSE272113_sCBD	2	DEG_GSE179661_HepG2; DEG_GSE179661_MHCC97H
IMPA2	9	5	DEG_GSE168797_Mock_CBD; DEG_GSE168797_SARS_CBD; DEG_GSE179661_HepG2; DEG_GSE201508_cGAMP; DEG_GSE274859_LPS_24h	4	DEG_GSE152088; DEG_GSE235310_LPS; DEG_GSE272113_CBD; DEG_GSE272113_sCBD
ING4	9	4	DEG_GSE151512_24h; DEG_GSE179661_HepG2; DEG_GSE235310_LPS; DEG_GSE272113_CBD	5	DEG_GSE131565; DEG_GSE168797_Mock_CBD; DEG_GSE168797_SARS_CBD; DEG_GSE179661_MHCC97H; DEG_GSE274859_LPS_24h
INPP4B	9	5	DEG_GSE152088; DEG_GSE168797_Mock_CBD; DEG_GSE261716_CBD0.2_2d; DEG_GSE272113_CBD; DEG_GSE272113_sCBD	4	DEG_GSE131565; DEG_GSE168797_SARS_CBDV; DEG_GSE201508_cGAMP; DEG_GSE274859_LPS_24h
INSIG2	9	2	DEG_GSE151512_24h; DEG_GSE235310_Veh	7	DEG_GSE131565; DEG_GSE152088; DEG_GSE168797_SARS_CBD; DEG_GSE179661_MHCC97H; DEG_GSE235310_LPS; DEG_GSE261716_CBD0.2_28d; DEG_GSE274859_LPS_24h
ISCU	9	3	DEG_GSE179661_HepG2; DEG_GSE235310_LPS; DEG_GSE272113_CBD	6	DEG_GSE131565; DEG_GSE151512_24h; DEG_GSE168797_Mock_CBD; DEG_GSE168797_SARS_CBD; DEG_GSE179661_MHCC97H; DEG_GSE261716_CBD20_28d
ISYNA1	9	5	DEG_GSE168797_Mock_CBD; DEG_GSE168797_SARS_CBD; DEG_GSE235310_LPS; DEG_GSE235310_Veh; DEG_GSE274859_LPS_24h	4	DEG_GSE151512_12h; DEG_GSE151512_24h; DEG_GSE272113_CBD; DEG_GSE272113_sCBD
ITGA7	9	6	DEG_GSE168797_SARS_CBD; DEG_GSE168797_SARS_CBDV; DEG_GSE179661_HepG2; DEG_GSE232624_Veh_CBD0.75_6h; DEG_GSE261716_CBD20_2d; DEG_GSE272113_CBD	3	DEG_GSE201508_cGAMP; DEG_GSE232624_EtOH0.75_CBD0.75_6h; DEG_GSE274859_LPS_24h
ITPK1	9	6	DEG_GSE131565; DEG_GSE261716_CBD0.2_28d; DEG_GSE261716_CBD20_28d; DEG_GSE261716_CBD20_2d; DEG_GSE274859_LPS_24h; GSE70689_CBD_NoLPS	3	DEG_GSE179661_HepG2; DEG_GSE272113_CBD; DEG_GSE272113_sCBD
JADE1	9	5	DEG_GSE151512_12h; DEG_GSE168797_Mock_CBD; DEG_GSE168797_SARS_CBD; DEG_GSE168797_SARS_CBDV; DEG_GSE274859_LPS_24h	4	DEG_GSE179661_HepG2; DEG_GSE179661_MHCC97H; DEG_GSE261716_CBD10_28d; DEG_GSE261716_CBD20_28d
JADE2	9	6	DEG_GSE131565; DEG_GSE168797_Mock_CBD; DEG_GSE168797_SARS_CBD; DEG_GSE235310_LPS; DEG_GSE272113_CBD; DEG_GSE272113_sCBD	3	DEG_GSE151512_12h; DEG_GSE151512_24h; DEG_GSE151512_6h
JTB	9	1	DEG_GSE151512_24h	8	DEG_GSE131565; DEG_GSE168797_SARS_CBD; DEG_GSE179661_HepG2; DEG_GSE179661_MHCC97H; DEG_GSE235310_LPS; DEG_GSE261716_CBD0.2_2d; DEG_GSE261716_CBD20_2d; DEG_GSE272113_sCBD
JUND	9	4	DEG_GSE151512_12h; DEG_GSE151512_6h; DEG_GSE168797_Mock_CBD; DEG_GSE261716_CBD20_28d	5	DEG_GSE131565; DEG_GSE168797_SARS_CBD; DEG_GSE179661_HepG2; DEG_GSE179661_MHCC97H; DEG_GSE274859_LPS_24h
KAT2A	9	7	DEG_GSE131565; DEG_GSE151512_6h; DEG_GSE168797_Mock_CBD; DEG_GSE168797_SARS_CBD; DEG_GSE179661_MHCC97H; DEG_GSE261716_CBD20_28d; DEG_GSE274859_LPS_24h	2	DEG_GSE272113_CBD; DEG_GSE272113_sCBD
KCMF1	9	0	NA	9	DEG_GSE131565; DEG_GSE151512_12h; DEG_GSE151512_24h; DEG_GSE151512_3h; DEG_GSE151512_6h; DEG_GSE168797_Mock_CBD; DEG_GSE168797_SARS_CBD; DEG_GSE179661_HepG2; DEG_GSE179661_MHCC97H
KCNAB2	9	2	DEG_GSE179661_HepG2; DEG_GSE179661_MHCC97H	7	DEG_GSE152088; DEG_GSE168797_Mock_CBD; DEG_GSE168797_SARS_CBD; DEG_GSE235310_LPS; DEG_GSE235310_Veh; DEG_GSE272113_CBD; DEG_GSE272113_sCBD
KCP	9	1	DEG_GSE232624_Veh_CBD0.75_12h	8	DEG_GSE131565; DEG_GSE168797_Mock_CBD; DEG_GSE168797_SARS_CBD; DEG_GSE179661_HepG2; DEG_GSE179661_MHCC97H; DEG_GSE201508_cGAMP; DEG_GSE235310_LPS; DEG_GSE235310_Veh
KCTD5	9	3	DEG_GSE151512_24h; DEG_GSE201508_cGAMP; DEG_GSE272113_sCBD	6	DEG_GSE131565; DEG_GSE168797_Mock_CBD; DEG_GSE168797_SARS_CBD; DEG_GSE179661_HepG2; DEG_GSE179661_MHCC97H; DEG_GSE235310_LPS
KDM7A	9	2	DEG_GSE168797_SARS_CBDV; DEG_GSE235310_Veh	7	DEG_GSE131565; DEG_GSE151512_12h; DEG_GSE168797_Mock_CBD; DEG_GSE179661_HepG2; DEG_GSE179661_MHCC97H; DEG_GSE201508_cGAMP; DEG_GSE235310_LPS
KIAA0513	9	3	DEG_GSE272113_sCBD; DEG_GSE274435_DMSO_24h; DEG_GSE274859_LPS_24h	6	DEG_GSE131565; DEG_GSE151512_24h; DEG_GSE168797_Mock_CBD; DEG_GSE179661_MHCC97H; DEG_GSE235310_Veh; GSE70689_CBD_wLPS
KIAA0930	9	6	DEG_GSE131565; DEG_GSE168797_Mock_CBDV; DEG_GSE201508_cGAMP; DEG_GSE201508_enthanol; DEG_GSE261716_CBD20_28d; DEG_GSE274859_LPS_24h	3	DEG_GSE152088; DEG_GSE235310_LPS; DEG_GSE235310_Veh
KIF1C	9	7	DEG_GSE168797_Mock_CBD; DEG_GSE168797_SARS_CBD; DEG_GSE179661_HepG2; DEG_GSE179661_MHCC97H; DEG_GSE201508_cGAMP; DEG_GSE261716_CBD20_28d; DEG_GSE261716_CBD20_2d	2	DEG_GSE272113_CBD; DEG_GSE274859_LPS_24h
KIF20A	9	9	DEG_GSE131565; DEG_GSE151512_12h; DEG_GSE151512_24h; DEG_GSE151512_6h; DEG_GSE168797_Mock_CBD; DEG_GSE168797_SARS_CBD; DEG_GSE179661_HepG2; DEG_GSE179661_MHCC97H; DEG_GSE274859_LPS_24h	0	NA
KIF22	9	9	DEG_GSE131565; DEG_GSE151512_12h; DEG_GSE151512_24h; DEG_GSE151512_6h; DEG_GSE168797_Mock_CBD; DEG_GSE168797_SARS_CBD; DEG_GSE201508_cGAMP; DEG_GSE235310_LPS; DEG_GSE274859_LPS_24h	0	NA
KIF4A	9	9	DEG_GSE131565; DEG_GSE151512_12h; DEG_GSE151512_24h; DEG_GSE151512_6h; DEG_GSE168797_Mock_CBD; DEG_GSE168797_SARS_CBD; DEG_GSE179661_HepG2; DEG_GSE179661_MHCC97H; DEG_GSE274859_LPS_24h	0	NA
KIFC1	9	9	DEG_GSE131565; DEG_GSE151512_12h; DEG_GSE151512_24h; DEG_GSE151512_6h; DEG_GSE168797_Mock_CBD; DEG_GSE168797_SARS_CBD; DEG_GSE179661_HepG2; DEG_GSE235310_LPS; DEG_GSE274859_LPS_24h	0	NA
KIFC2	9	6	DEG_GSE151512_24h; DEG_GSE168797_Mock_CBD; DEG_GSE201508_enthanol; DEG_GSE235310_LPS; DEG_GSE235310_Veh; DEG_GSE261716_CBD20_28d	3	DEG_GSE131565; DEG_GSE179661_HepG2; DEG_GSE179661_MHCC97H
KLC2	9	4	DEG_GSE151512_6h; DEG_GSE235310_LPS; DEG_GSE274435_DMSO_24h; DEG_GSE274435_EtOH_24h	5	DEG_GSE131565; DEG_GSE168797_Mock_CBD; DEG_GSE179661_HepG2; DEG_GSE179661_MHCC97H; DEG_GSE274859_LPS_24h
KLF7	9	4	DEG_GSE201508_enthanol; DEG_GSE235310_LPS; DEG_GSE266113_mutNdufs4; DEG_GSE274859_LPS_24h	5	DEG_GSE151512_24h; DEG_GSE168797_Mock_CBD; DEG_GSE179661_MHCC97H; DEG_GSE235310_Veh; GSE70689_CBD_NoLPS
KLHL21	9	1	DEG_GSE168797_Mock_CBDV	8	DEG_GSE131565; DEG_GSE168797_Mock_CBD; DEG_GSE168797_SARS_CBD; DEG_GSE168797_SARS_CBDV; DEG_GSE179661_HepG2; DEG_GSE179661_MHCC97H; DEG_GSE272113_CBD; DEG_GSE272113_sCBD
KLHL5	9	2	DEG_GSE179661_HepG2; DEG_GSE274859_LPS_24h	7	DEG_GSE151512_12h; DEG_GSE151512_24h; DEG_GSE168797_SARS_CBD; DEG_GSE168797_SARS_CBDV; DEG_GSE179661_MHCC97H; DEG_GSE235310_Veh; DEG_GSE261716_CBD20_28d
KREMEN1	9	5	DEG_GSE131565; DEG_GSE151512_12h; DEG_GSE151512_6h; DEG_GSE261716_CBD20_2d; DEG_GSE272113_sCBD	4	DEG_GSE152088; DEG_GSE168797_SARS_CBDV; DEG_GSE235310_LPS; DEG_GSE274859_LPS_24h
KRT19	9	5	DEG_GSE168797_Mock_CBD; DEG_GSE168797_Mock_CBDV; DEG_GSE179661_MHCC97H; DEG_GSE261716_CBD20_28d; DEG_GSE272113_CBD	4	DEG_GSE131565; DEG_GSE152088; DEG_GSE168797_SARS_CBDV; DEG_GSE179661_HepG2
LAMC1	9	4	DEG_GSE131565; DEG_GSE179661_HepG2; DEG_GSE179661_MHCC97H; DEG_GSE261716_CBD10_28d	5	DEG_GSE151512_24h; DEG_GSE201508_cGAMP; DEG_GSE272113_CBD; DEG_GSE272113_sCBD; DEG_GSE274435_DMSO_24h
LARP6	9	0	NA	9	DEG_GSE131565; DEG_GSE151512_24h; DEG_GSE152088; DEG_GSE168797_SARS_CBD; DEG_GSE179661_HepG2; DEG_GSE179661_MHCC97H; DEG_GSE235310_Veh; DEG_GSE272113_CBD; DEG_GSE272113_sCBD
LBH	9	6	DEG_GSE151512_12h; DEG_GSE168797_Mock_CBD; DEG_GSE168797_SARS_CBD; DEG_GSE261716_CBD0.2_28d; DEG_GSE266113_WT; DEG_GSE274859_LPS_24h	3	DEG_GSE131565; DEG_GSE179661_HepG2; DEG_GSE232624_Veh_CBD0.75_6h
LIMA1	9	6	DEG_GSE131565; DEG_GSE151512_6h; DEG_GSE152088; DEG_GSE179661_HepG2; DEG_GSE235310_Veh; DEG_GSE272113_sCBD	3	DEG_GSE179661_MHCC97H; DEG_GSE235310_LPS; DEG_GSE274859_LPS_24h
LLGL2	9	5	DEG_GSE168797_Mock_CBD; DEG_GSE168797_SARS_CBD; DEG_GSE235310_LPS; DEG_GSE235310_Veh; DEG_GSE261716_CBD20_28d	4	DEG_GSE131565; DEG_GSE179661_HepG2; DEG_GSE201508_cGAMP; DEG_GSE272113_sCBD
LMNA	9	8	DEG_GSE131565; DEG_GSE151512_12h; DEG_GSE168797_Mock_CBD; DEG_GSE179661_MHCC97H; DEG_GSE201508_cGAMP; DEG_GSE235310_Veh; DEG_GSE272113_sCBD; DEG_GSE274859_LPS_24h	1	DEG_GSE179661_HepG2
LPAR3	9	2	DEG_GSE272113_CBD; DEG_GSE272113_sCBD	7	DEG_GSE131565; DEG_GSE151512_12h; DEG_GSE151512_24h; DEG_GSE151512_3h; DEG_GSE151512_6h; DEG_GSE201508_cGAMP; DEG_GSE201508_enthanol
LPIN1	9	3	DEG_GSE235310_LPS; DEG_GSE235310_Veh; DEG_GSE274859_LPS_24h	6	DEG_GSE131565; DEG_GSE151512_24h; DEG_GSE168797_SARS_CBD; DEG_GSE179661_HepG2; DEG_GSE261716_CBD0.2_28d; DEG_GSE261716_CBD0.2_2d
LRP10	9	3	DEG_GSE168797_Mock_CBDV; DEG_GSE179661_MHCC97H; DEG_GSE261716_CBD20_28d	6	DEG_GSE131565; DEG_GSE151512_24h; DEG_GSE152088; DEG_GSE168797_Mock_CBD; DEG_GSE179661_HepG2; DEG_GSE235310_LPS
LRP11	9	7	DEG_GSE131565; DEG_GSE168797_Mock_CBD; DEG_GSE179661_HepG2; DEG_GSE179661_MHCC97H; DEG_GSE201508_cGAMP; DEG_GSE235310_LPS; DEG_GSE235310_Veh	2	DEG_GSE151512_24h; DEG_GSE152088
LRP5	9	6	DEG_GSE131565; DEG_GSE168797_SARS_CBD; DEG_GSE179661_HepG2; DEG_GSE179661_MHCC97H; DEG_GSE261716_CBD20_28d; DEG_GSE274859_LPS_24h	3	DEG_GSE151512_24h; DEG_GSE152088; DEG_GSE272113_CBD
LRP8	9	5	DEG_GSE131565; DEG_GSE152088; DEG_GSE179661_HepG2; DEG_GSE179661_MHCC97H; DEG_GSE274859_LPS_24h	4	DEG_GSE151512_12h; DEG_GSE151512_24h; DEG_GSE272113_CBD; DEG_GSE272113_sCBD
LSM4	9	8	DEG_GSE131565; DEG_GSE151512_12h; DEG_GSE151512_24h; DEG_GSE168797_Mock_CBD; DEG_GSE201508_cGAMP; DEG_GSE235310_LPS; DEG_GSE235310_Veh; DEG_GSE274859_LPS_24h	1	DEG_GSE261716_CBD0.2_2d
LTBP1	9	6	DEG_GSE131565; DEG_GSE151512_12h; DEG_GSE151512_6h; DEG_GSE168797_Mock_CBD; DEG_GSE168797_SARS_CBD; DEG_GSE179661_MHCC97H	3	DEG_GSE168797_SARS_CBDV; DEG_GSE272113_CBD; DEG_GSE272113_sCBD
LYST	9	3	DEG_GSE168797_Mock_CBDV; DEG_GSE168797_SARS_CBDV; DEG_GSE235310_LPS	6	DEG_GSE131565; DEG_GSE151512_24h; DEG_GSE168797_Mock_CBD; DEG_GSE179661_MHCC97H; DEG_GSE272113_CBD; DEG_GSE272113_sCBD
MAFB	9	3	DEG_GSE151512_12h; DEG_GSE235310_Veh; DEG_GSE261716_CBD0.2_2d	6	DEG_GSE152088; DEG_GSE168797_Mock_CBD; DEG_GSE168797_SARS_CBD; DEG_GSE179661_HepG2; DEG_GSE201508_enthanol; DEG_GSE235310_LPS
MAGT1	9	1	DEG_GSE261716_CBD0.2_28d	8	DEG_GSE131565; DEG_GSE168797_Mock_CBD; DEG_GSE168797_SARS_CBD; DEG_GSE179661_MHCC97H; DEG_GSE201508_cGAMP; DEG_GSE272113_CBD; DEG_GSE272113_sCBD; DEG_GSE274859_LPS_24h
MAML2	9	6	DEG_GSE131565; DEG_GSE168797_Mock_CBD; DEG_GSE168797_SARS_CBD; DEG_GSE179661_HepG2; DEG_GSE179661_MHCC97H; DEG_GSE272113_sCBD	3	DEG_GSE201508_cGAMP; DEG_GSE235310_LPS; DEG_GSE274859_LPS_24h
MAP1B	9	2	DEG_GSE272113_CBD; DEG_GSE272113_sCBD	7	DEG_GSE131565; DEG_GSE151512_24h; DEG_GSE168797_Mock_CBD; DEG_GSE168797_SARS_CBD; DEG_GSE179661_HepG2; DEG_GSE201508_cGAMP; DEG_GSE232624_EtOH0.75_CBD0.75_12h
MAP2K3	9	5	DEG_GSE131565; DEG_GSE151512_24h; DEG_GSE151512_6h; DEG_GSE168797_SARS_CBDV; DEG_GSE201508_cGAMP	4	DEG_GSE168797_Mock_CBD; DEG_GSE179661_HepG2; DEG_GSE179661_MHCC97H; DEG_GSE235310_LPS
MAP3K14	9	7	DEG_GSE131565; DEG_GSE151512_6h; DEG_GSE168797_SARS_CBD; DEG_GSE235310_LPS; DEG_GSE235310_Veh; DEG_GSE272113_sCBD; DEG_GSE274859_LPS_24h	2	DEG_GSE179661_HepG2; DEG_GSE274435_EtOH_24h
MAP3K8	9	3	DEG_GSE168797_SARS_CBDV; DEG_GSE235310_LPS; DEG_GSE235310_Veh	6	DEG_GSE131565; DEG_GSE179661_MHCC97H; DEG_GSE201508_cGAMP; DEG_GSE261716_CBD20_28d; DEG_GSE272113_CBD; DEG_GSE272113_sCBD
MAPK7	9	4	DEG_GSE151512_24h; DEG_GSE168797_Mock_CBD; DEG_GSE168797_SARS_CBD; DEG_GSE261716_CBD20_28d	5	DEG_GSE131565; DEG_GSE179661_HepG2; DEG_GSE179661_MHCC97H; DEG_GSE272113_CBD; DEG_GSE274859_LPS_24h
MAPRE3	9	2	DEG_GSE272113_CBD; DEG_GSE272113_sCBD	7	DEG_GSE131565; DEG_GSE151512_12h; DEG_GSE151512_24h; DEG_GSE168797_Mock_CBD; DEG_GSE168797_SARS_CBD; DEG_GSE179661_MHCC97H; DEG_GSE235310_LPS
MARS2	9	5	DEG_GSE131565; DEG_GSE168797_SARS_CBD; DEG_GSE179661_MHCC97H; DEG_GSE201508_cGAMP; DEG_GSE274859_LPS_24h	4	DEG_GSE151512_12h; DEG_GSE151512_24h; DEG_GSE235310_LPS; DEG_GSE266113_WT
MASTL	9	7	DEG_GSE131565; DEG_GSE152088; DEG_GSE168797_Mock_CBD; DEG_GSE168797_SARS_CBD; DEG_GSE179661_HepG2; DEG_GSE201508_cGAMP; DEG_GSE232624_EtOH0.75_CBD0.75_6h	2	DEG_GSE179661_MHCC97H; DEG_GSE266113_WT
MB21D2	9	2	DEG_GSE131565; DEG_GSE235310_Veh	7	DEG_GSE151512_12h; DEG_GSE151512_24h; DEG_GSE151512_3h; DEG_GSE151512_6h; DEG_GSE168797_Mock_CBD; DEG_GSE179661_HepG2; DEG_GSE179661_MHCC97H
MBD6	9	1	DEG_GSE261716_CBD20_28d	8	DEG_GSE131565; DEG_GSE179661_HepG2; DEG_GSE179661_MHCC97H; DEG_GSE201508_cGAMP; DEG_GSE201508_enthanol; DEG_GSE272113_CBD; DEG_GSE272113_sCBD; DEG_GSE274859_LPS_24h
MBNL2	9	0	NA	9	DEG_GSE131565; DEG_GSE168797_Mock_CBD; DEG_GSE168797_SARS_CBD; DEG_GSE179661_HepG2; DEG_GSE179661_MHCC97H; DEG_GSE235310_Veh; DEG_GSE272113_CBD; DEG_GSE272113_sCBD; DEG_GSE274859_LPS_24h
MCC	9	8	DEG_GSE131565; DEG_GSE151512_12h; DEG_GSE151512_24h; DEG_GSE179661_HepG2; DEG_GSE235310_LPS; DEG_GSE261716_CBD10_28d; DEG_GSE261716_CBD20_28d; DEG_GSE272113_CBD	1	DEG_GSE274435_DMSO_24h
MCEE	9	2	DEG_GSE179661_HepG2; DEG_GSE272113_CBD	7	DEG_GSE131565; DEG_GSE168797_Mock_CBD; DEG_GSE168797_SARS_CBD; DEG_GSE179661_MHCC97H; DEG_GSE235310_LPS; DEG_GSE261716_CBD20_28d; DEG_GSE261716_CBD20_2d
MCM4	9	8	DEG_GSE131565; DEG_GSE152088; DEG_GSE168797_Mock_CBD; DEG_GSE168797_SARS_CBD; DEG_GSE179661_HepG2; DEG_GSE179661_MHCC97H; DEG_GSE235310_Veh; DEG_GSE274859_LPS_24h	1	DEG_GSE266113_WT
ME1	9	1	DEG_GSE179661_MHCC97H	8	DEG_GSE131565; DEG_GSE151512_12h; DEG_GSE151512_24h; DEG_GSE151512_6h; DEG_GSE168797_SARS_CBD; DEG_GSE168797_SARS_CBDV; DEG_GSE201508_cGAMP; DEG_GSE201508_enthanol
MED25	9	5	DEG_GSE151512_6h; DEG_GSE168797_SARS_CBD; DEG_GSE232624_Veh_CBD0.75_12h; DEG_GSE232624_Veh_CBD3_12h; DEG_GSE232624_Veh_CBD3_6h	4	DEG_GSE152088; DEG_GSE179661_HepG2; DEG_GSE179661_MHCC97H; DEG_GSE232624_EtOH0.25_CBD0.75_12h
MELTF	9	3	DEG_GSE131565; DEG_GSE179661_MHCC97H; DEG_GSE235310_LPS	6	DEG_GSE151512_12h; DEG_GSE151512_24h; DEG_GSE151512_6h; DEG_GSE201508_cGAMP; DEG_GSE201508_enthanol; DEG_GSE235310_Veh
MERTK	9	2	DEG_GSE179661_HepG2; GSE70689_CBD_NoLPS	7	DEG_GSE131565; DEG_GSE151512_24h; DEG_GSE168797_Mock_CBD; DEG_GSE168797_SARS_CBD; DEG_GSE179661_MHCC97H; DEG_GSE201508_cGAMP; DEG_GSE201508_enthanol
MFSD3	9	4	DEG_GSE131565; DEG_GSE168797_Mock_CBD; DEG_GSE179661_MHCC97H; DEG_GSE235310_Veh	5	DEG_GSE151512_12h; DEG_GSE151512_24h; DEG_GSE152088; DEG_GSE179661_HepG2; DEG_GSE261716_CBD0.2_2d
MGAT1	9	1	DEG_GSE151512_6h	8	DEG_GSE168797_Mock_CBD; DEG_GSE168797_SARS_CBD; DEG_GSE179661_HepG2; DEG_GSE179661_MHCC97H; DEG_GSE201508_cGAMP; DEG_GSE201508_enthanol; DEG_GSE235310_LPS; DEG_GSE235310_Veh
MGAT4A	9	5	DEG_GSE179661_HepG2; DEG_GSE201508_enthanol; DEG_GSE235310_Veh; DEG_GSE261716_CBD0.2_2d; DEG_GSE274859_LPS_24h	4	DEG_GSE131565; DEG_GSE151512_24h; DEG_GSE235310_LPS; DEG_GSE275998_CDB10
MIA2	9	0	NA	9	DEG_GSE131565; DEG_GSE151512_24h; DEG_GSE168797_Mock_CBD; DEG_GSE168797_SARS_CBD; DEG_GSE179661_MHCC97H; DEG_GSE235310_Veh; DEG_GSE272113_CBD; DEG_GSE272113_sCBD; DEG_GSE274859_LPS_24h
MIA3	9	2	DEG_GSE168797_SARS_CBDV; DEG_GSE201508_enthanol	7	DEG_GSE131565; DEG_GSE168797_Mock_CBD; DEG_GSE168797_SARS_CBD; DEG_GSE179661_MHCC97H; DEG_GSE235310_LPS; DEG_GSE272113_CBD; DEG_GSE274859_LPS_24h
MIB2	9	5	DEG_GSE151512_6h; DEG_GSE168797_Mock_CBD; DEG_GSE168797_SARS_CBD; DEG_GSE261716_CBD20_28d; DEG_GSE266113_WT	4	DEG_GSE131565; DEG_GSE179661_HepG2; DEG_GSE272113_CBD; DEG_GSE274859_LPS_24h
MICALL1	9	2	DEG_GSE261716_CBD10_28d; DEG_GSE261716_CBD20_28d	7	DEG_GSE131565; DEG_GSE168797_Mock_CBD; DEG_GSE168797_SARS_CBD; DEG_GSE179661_HepG2; DEG_GSE179661_MHCC97H; DEG_GSE235310_LPS; DEG_GSE235310_Veh
MIDN	9	7	DEG_GSE151512_24h; DEG_GSE151512_6h; DEG_GSE168797_SARS_CBD; DEG_GSE179661_MHCC97H; DEG_GSE272113_CBD; DEG_GSE272113_sCBD; DEG_GSE274859_LPS_24h	2	DEG_GSE131565; DEG_GSE179661_HepG2
MLKL	9	3	DEG_GSE179661_HepG2; DEG_GSE179661_MHCC97H; DEG_GSE201508_cGAMP	6	DEG_GSE168797_Mock_CBD; DEG_GSE168797_SARS_CBD; DEG_GSE235310_LPS; DEG_GSE235310_Veh; DEG_GSE272113_CBD; DEG_GSE272113_sCBD
MMP15	9	7	DEG_GSE168797_Mock_CBD; DEG_GSE179661_MHCC97H; DEG_GSE201508_cGAMP; DEG_GSE235310_Veh; DEG_GSE261716_CBD20_2d; DEG_GSE272113_CBD; DEG_GSE272113_sCBD	2	DEG_GSE131565; DEG_GSE151512_24h
MOB3A	9	7	DEG_GSE151512_12h; DEG_GSE151512_24h; DEG_GSE168797_Mock_CBD; DEG_GSE201508_cGAMP; DEG_GSE235310_LPS; DEG_GSE266113_WT; DEG_GSE274859_LPS_24h	2	DEG_GSE179661_HepG2; DEG_GSE179661_MHCC97H
MOCOS	9	2	DEG_GSE235310_LPS; DEG_GSE235310_Veh	7	DEG_GSE131565; DEG_GSE151512_24h; DEG_GSE168797_Mock_CBD; DEG_GSE168797_SARS_CBD; DEG_GSE179661_MHCC97H; DEG_GSE272113_CBD; DEG_GSE272113_sCBD
MOSPD1	9	0	NA	9	DEG_GSE131565; DEG_GSE168797_Mock_CBD; DEG_GSE168797_SARS_CBD; DEG_GSE179661_HepG2; DEG_GSE179661_MHCC97H; DEG_GSE235310_LPS; DEG_GSE235310_Veh; DEG_GSE274859_LPS_24h; GSE70689_CBD_NoLPS
MPHOSPH10	9	4	DEG_GSE131565; DEG_GSE152088; DEG_GSE179661_HepG2; DEG_GSE235310_Veh	5	DEG_GSE151512_24h; DEG_GSE168797_Mock_CBD; DEG_GSE179661_MHCC97H; DEG_GSE272113_CBD; DEG_GSE272113_sCBD
MRAS	9	2	DEG_GSE151512_24h; DEG_GSE179661_HepG2	7	DEG_GSE152088; DEG_GSE168797_Mock_CBD; DEG_GSE168797_SARS_CBD; DEG_GSE201508_cGAMP; DEG_GSE201508_enthanol; DEG_GSE235310_LPS; DEG_GSE235310_Veh
MRI1	9	7	DEG_GSE131565; DEG_GSE168797_Mock_CBD; DEG_GSE179661_HepG2; DEG_GSE179661_MHCC97H; DEG_GSE235310_LPS; DEG_GSE235310_Veh; DEG_GSE274859_LPS_24h	2	DEG_GSE272113_CBD; DEG_GSE272113_sCBD
MRPL12	9	7	DEG_GSE131565; DEG_GSE151512_24h; DEG_GSE168797_Mock_CBD; DEG_GSE179661_HepG2; DEG_GSE179661_MHCC97H; DEG_GSE201508_cGAMP; DEG_GSE274859_LPS_24h	2	DEG_GSE261716_CBD0.2_2d; DEG_GSE272113_sCBD
MRPL18	9	4	DEG_GSE131565; DEG_GSE151512_12h; DEG_GSE151512_24h; DEG_GSE274859_LPS_24h	5	DEG_GSE168797_Mock_CBD; DEG_GSE168797_SARS_CBD; DEG_GSE201508_cGAMP; DEG_GSE261716_CBD20_28d; DEG_GSE261716_CBD20_2d
MRPL40	9	7	DEG_GSE131565; DEG_GSE151512_12h; DEG_GSE151512_24h; DEG_GSE168797_Mock_CBD; DEG_GSE179661_HepG2; DEG_GSE179661_MHCC97H; DEG_GSE201508_cGAMP	2	DEG_GSE261716_CBD20_28d; DEG_GSE261716_CBD20_2d
MRTO4	9	7	DEG_GSE131565; DEG_GSE152088; DEG_GSE168797_Mock_CBD; DEG_GSE168797_SARS_CBD; DEG_GSE179661_MHCC97H; DEG_GSE201508_cGAMP; DEG_GSE274859_LPS_24h	2	DEG_GSE261716_CBD0.2_2d; DEG_GSE266113_WT
MSH2	9	9	DEG_GSE131565; DEG_GSE151512_24h; DEG_GSE168797_Mock_CBD; DEG_GSE168797_SARS_CBD; DEG_GSE179661_HepG2; DEG_GSE179661_MHCC97H; DEG_GSE235310_Veh; DEG_GSE261716_CBD20_28d; DEG_GSE274859_LPS_24h	0	NA
MT-ATP6	9	9	DEG_GSE131565; DEG_GSE151512_12h; DEG_GSE151512_24h; DEG_GSE151512_3h; DEG_GSE151512_6h; DEG_GSE168797_Mock_CBD; DEG_GSE168797_SARS_CBD; DEG_GSE179661_MHCC97H; DEG_GSE201508_enthanol	0	NA
MT-CO2	9	8	DEG_GSE131565; DEG_GSE168797_Mock_CBD; DEG_GSE168797_SARS_CBD; DEG_GSE179661_HepG2; DEG_GSE179661_MHCC97H; DEG_GSE201508_enthanol; DEG_GSE235310_LPS; DEG_GSE235310_Veh	1	DEG_GSE232624_Veh_CBD3_6h
MT-CO3	9	9	DEG_GSE131565; DEG_GSE151512_12h; DEG_GSE151512_24h; DEG_GSE151512_6h; DEG_GSE168797_Mock_CBD; DEG_GSE168797_SARS_CBD; DEG_GSE179661_HepG2; DEG_GSE179661_MHCC97H; DEG_GSE201508_enthanol	0	NA
MT-CYB	9	9	DEG_GSE131565; DEG_GSE151512_12h; DEG_GSE151512_24h; DEG_GSE168797_Mock_CBD; DEG_GSE168797_SARS_CBD; DEG_GSE179661_HepG2; DEG_GSE179661_MHCC97H; DEG_GSE201508_enthanol; DEG_GSE235310_Veh	0	NA
MT-ND2	9	9	DEG_GSE131565; DEG_GSE151512_12h; DEG_GSE151512_24h; DEG_GSE151512_3h; DEG_GSE168797_Mock_CBD; DEG_GSE168797_SARS_CBD; DEG_GSE179661_HepG2; DEG_GSE179661_MHCC97H; DEG_GSE232624_EtOH0.25_CBD0.75_12h	0	NA
MT1M	9	0	NA	9	DEG_GSE131565; DEG_GSE151512_12h; DEG_GSE151512_3h; DEG_GSE151512_6h; DEG_GSE179661_HepG2; DEG_GSE179661_MHCC97H; DEG_GSE201508_cGAMP; DEG_GSE201508_enthanol; DEG_GSE235310_Veh
MTA2	9	8	DEG_GSE131565; DEG_GSE151512_24h; DEG_GSE168797_Mock_CBD; DEG_GSE168797_SARS_CBD; DEG_GSE179661_MHCC97H; DEG_GSE201508_cGAMP; DEG_GSE235310_LPS; DEG_GSE235310_Veh	1	DEG_GSE179661_HepG2
MTHFR	9	3	DEG_GSE168797_SARS_CBDV; DEG_GSE261716_CBD10_28d; DEG_GSE261716_CBD20_28d	6	DEG_GSE131565; DEG_GSE151512_12h; DEG_GSE151512_24h; DEG_GSE151512_6h; DEG_GSE168797_Mock_CBD; DEG_GSE201508_cGAMP
MXI1	9	3	DEG_GSE151512_24h; DEG_GSE235310_LPS; DEG_GSE274859_LPS_24h	6	DEG_GSE131565; DEG_GSE168797_Mock_CBD; DEG_GSE168797_SARS_CBD; DEG_GSE179661_MHCC97H; DEG_GSE235310_Veh; DEG_GSE272113_sCBD
MYBL2	9	9	DEG_GSE131565; DEG_GSE151512_24h; DEG_GSE151512_6h; DEG_GSE168797_Mock_CBD; DEG_GSE168797_SARS_CBD; DEG_GSE179661_HepG2; DEG_GSE201508_cGAMP; DEG_GSE235310_LPS; DEG_GSE274859_LPS_24h	0	NA
MYLIP	9	7	DEG_GSE131565; DEG_GSE151512_6h; DEG_GSE168797_Mock_CBD; DEG_GSE235310_LPS; DEG_GSE261716_CBD0.2_2d; DEG_GSE274435_DMSO_24h; DEG_GSE274859_LPS_24h	2	DEG_GSE151512_24h; DEG_GSE179661_HepG2
MYO10	9	6	DEG_GSE168797_Mock_CBD; DEG_GSE168797_SARS_CBD; DEG_GSE168797_SARS_CBDV; DEG_GSE179661_MHCC97H; DEG_GSE261716_CBD10_28d; DEG_GSE274859_LPS_24h	3	DEG_GSE151512_24h; DEG_GSE201508_cGAMP; DEG_GSE235310_LPS
MYO1B	9	7	DEG_GSE131565; DEG_GSE152088; DEG_GSE168797_Mock_CBD; DEG_GSE235310_Veh; DEG_GSE261716_CBD10_28d; DEG_GSE261716_CBD20_28d; DEG_GSE266113_WT	2	DEG_GSE179661_HepG2; DEG_GSE235310_LPS
MYO1C	9	6	DEG_GSE168797_Mock_CBD; DEG_GSE168797_SARS_CBD; DEG_GSE235310_LPS; DEG_GSE235310_Veh; DEG_GSE261716_CBD0.2_2d; DEG_GSE274859_LPS_24h	3	DEG_GSE179661_HepG2; DEG_GSE179661_MHCC97H; DEG_GSE272113_CBD
N4BP2L1	9	2	DEG_GSE235310_LPS; DEG_GSE274859_LPS_24h	7	DEG_GSE131565; DEG_GSE151512_24h; DEG_GSE151512_6h; DEG_GSE179661_MHCC97H; DEG_GSE201508_enthanol; DEG_GSE235310_Veh; DEG_GSE261716_CBD20_2d
NAA25	9	5	DEG_GSE131565; DEG_GSE152088; DEG_GSE179661_MHCC97H; DEG_GSE235310_LPS; DEG_GSE235310_Veh	4	DEG_GSE151512_12h; DEG_GSE151512_24h; DEG_GSE151512_6h; DEG_GSE168797_Mock_CBD
NAA40	9	6	DEG_GSE151512_24h; DEG_GSE168797_Mock_CBD; DEG_GSE168797_SARS_CBD; DEG_GSE179661_HepG2; DEG_GSE179661_MHCC97H; DEG_GSE235310_Veh	3	DEG_GSE168797_SARS_CBDV; DEG_GSE272113_CBD; DEG_GSE272113_sCBD
NAB2	9	2	DEG_GSE274859_LPS_24h; GSE70689_CBD_wLPS	7	DEG_GSE131565; DEG_GSE151512_24h; DEG_GSE179661_HepG2; DEG_GSE179661_MHCC97H; DEG_GSE201508_cGAMP; DEG_GSE235310_LPS; DEG_GSE272113_CBD
NAGK	9	1	DEG_GSE151512_24h	8	DEG_GSE131565; DEG_GSE168797_Mock_CBD; DEG_GSE168797_SARS_CBD; DEG_GSE179661_MHCC97H; DEG_GSE235310_LPS; DEG_GSE261716_CBD20_28d; DEG_GSE274859_LPS_24h; GSE70689_CBD_NoLPS
NANS	9	1	DEG_GSE274859_LPS_24h	8	DEG_GSE131565; DEG_GSE168797_Mock_CBD; DEG_GSE168797_SARS_CBD; DEG_GSE168797_SARS_CBDV; DEG_GSE179661_MHCC97H; DEG_GSE201508_cGAMP; DEG_GSE235310_LPS; DEG_GSE235310_Veh
NCBP1	9	8	DEG_GSE131565; DEG_GSE151512_12h; DEG_GSE151512_24h; DEG_GSE168797_Mock_CBD; DEG_GSE179661_HepG2; DEG_GSE179661_MHCC97H; DEG_GSE201508_cGAMP; DEG_GSE232624_Veh_CBD0.75_6h	1	DEG_GSE232624_EtOH0.75_CBD0.75_6h
NCF2	9	3	DEG_GSE201508_cGAMP; DEG_GSE201508_enthanol; DEG_GSE274859_LPS_24h	6	DEG_GSE131565; DEG_GSE168797_SARS_CBD; DEG_GSE168797_SARS_CBDV; DEG_GSE179661_HepG2; DEG_GSE179661_MHCC97H; DEG_GSE235310_LPS
NCLN	9	4	DEG_GSE131565; DEG_GSE151512_24h; DEG_GSE179661_MHCC97H; DEG_GSE261716_CBD20_2d	5	DEG_GSE235310_LPS; DEG_GSE235310_Veh; DEG_GSE266113_WT; DEG_GSE272113_CBD; DEG_GSE272113_sCBD
NCS1	9	6	DEG_GSE131565; DEG_GSE151512_24h; DEG_GSE168797_Mock_CBD; DEG_GSE168797_Mock_CBDV; DEG_GSE179661_MHCC97H; DEG_GSE274859_LPS_24h	3	DEG_GSE179661_HepG2; DEG_GSE235310_LPS; DEG_GSE235310_Veh
NDUFC1	9	7	DEG_GSE151512_12h; DEG_GSE168797_Mock_CBD; DEG_GSE201508_cGAMP; DEG_GSE235310_LPS; DEG_GSE272113_CBD; DEG_GSE272113_sCBD; DEG_GSE274859_LPS_24h	2	DEG_GSE168797_SARS_CBDV; DEG_GSE261716_CBD0.2_2d
NDUFS5	9	6	DEG_GSE131565; DEG_GSE151512_12h; DEG_GSE151512_24h; DEG_GSE168797_Mock_CBD; DEG_GSE179661_HepG2; DEG_GSE272113_CBD	3	DEG_GSE261716_CBD0.2_2d; DEG_GSE261716_CBD20_28d; DEG_GSE261716_CBD20_2d
NEO1	9	3	DEG_GSE179661_HepG2; DEG_GSE179661_MHCC97H; DEG_GSE261716_CBD0.2_2d	6	DEG_GSE151512_12h; DEG_GSE151512_24h; DEG_GSE235310_LPS; DEG_GSE235310_Veh; DEG_GSE272113_CBD; DEG_GSE272113_sCBD
NES	9	8	DEG_GSE131565; DEG_GSE168797_Mock_CBD; DEG_GSE168797_SARS_CBD; DEG_GSE179661_HepG2; DEG_GSE179661_MHCC97H; DEG_GSE235310_LPS; DEG_GSE235310_Veh; DEG_GSE272113_sCBD	1	DEG_GSE151512_12h
NEURL1B	9	8	DEG_GSE131565; DEG_GSE151512_12h; DEG_GSE151512_6h; DEG_GSE168797_Mock_CBD; DEG_GSE168797_SARS_CBD; DEG_GSE179661_MHCC97H; DEG_GSE235310_LPS; DEG_GSE274859_LPS_24h	1	DEG_GSE152088
NFKB2	9	4	DEG_GSE168797_Mock_CBDV; DEG_GSE168797_SARS_CBD; DEG_GSE168797_SARS_CBDV; DEG_GSE274859_LPS_24h	5	DEG_GSE131565; DEG_GSE168797_Mock_CBD; DEG_GSE179661_HepG2; DEG_GSE179661_MHCC97H; DEG_GSE272113_CBD
NFKBIZ	9	4	DEG_GSE151512_6h; DEG_GSE168797_SARS_CBD; DEG_GSE168797_SARS_CBDV; DEG_GSE235310_LPS	5	DEG_GSE131565; DEG_GSE179661_MHCC97H; DEG_GSE201508_cGAMP; DEG_GSE261716_CBD20_28d; DEG_GSE274859_LPS_24h
NFXL1	9	1	DEG_GSE235310_Veh	8	DEG_GSE131565; DEG_GSE151512_12h; DEG_GSE151512_24h; DEG_GSE168797_Mock_CBD; DEG_GSE168797_SARS_CBD; DEG_GSE179661_HepG2; DEG_GSE179661_MHCC97H; DEG_GSE274859_LPS_24h
NID2	9	5	DEG_GSE131565; DEG_GSE261716_CBD20_28d; DEG_GSE266113_WT; DEG_GSE272113_CBD; DEG_GSE272113_sCBD	4	DEG_GSE151512_3h; DEG_GSE168797_Mock_CBD; DEG_GSE168797_SARS_CBD; DEG_GSE274435_DMSO_24h
NIPSNAP3A	9	3	DEG_GSE131565; DEG_GSE168797_Mock_CBD; DEG_GSE235310_LPS	6	DEG_GSE168797_Mock_CBDV; DEG_GSE261716_CBD10_28d; DEG_GSE261716_CBD20_28d; DEG_GSE261716_CBD20_2d; DEG_GSE272113_sCBD; DEG_GSE274859_LPS_24h
NLE1	9	3	DEG_GSE131565; DEG_GSE168797_Mock_CBDV; DEG_GSE179661_MHCC97H	6	DEG_GSE151512_12h; DEG_GSE151512_24h; DEG_GSE168797_Mock_CBD; DEG_GSE179661_HepG2; DEG_GSE272113_CBD; DEG_GSE272113_sCBD
NMD3	9	3	DEG_GSE152088; DEG_GSE235310_LPS; DEG_GSE235310_Veh	6	DEG_GSE151512_12h; DEG_GSE151512_24h; DEG_GSE151512_6h; DEG_GSE168797_Mock_CBD; DEG_GSE179661_HepG2; DEG_GSE179661_MHCC97H
NME1	9	6	DEG_GSE131565; DEG_GSE151512_24h; DEG_GSE168797_Mock_CBD; DEG_GSE179661_MHCC97H; DEG_GSE235310_Veh; DEG_GSE261716_CBD20_28d	3	DEG_GSE235310_LPS; DEG_GSE261716_CBD0.2_2d; DEG_GSE272113_sCBD
NOC3L	9	4	DEG_GSE131565; DEG_GSE152088; DEG_GSE179661_MHCC97H; DEG_GSE235310_LPS	5	DEG_GSE151512_12h; DEG_GSE151512_24h; DEG_GSE151512_6h; DEG_GSE272113_CBD; DEG_GSE274859_LPS_24h
NOLC1	9	7	DEG_GSE131565; DEG_GSE152088; DEG_GSE179661_MHCC97H; DEG_GSE201508_cGAMP; DEG_GSE201508_enthanol; DEG_GSE235310_LPS; DEG_GSE274859_LPS_24h	2	DEG_GSE266113_WT; DEG_GSE272113_CBD
NOP2	9	5	DEG_GSE131565; DEG_GSE152088; DEG_GSE168797_SARS_CBDV; DEG_GSE179661_MHCC97H; DEG_GSE274859_LPS_24h	4	DEG_GSE151512_24h; DEG_GSE266113_WT; DEG_GSE272113_CBD; DEG_GSE272113_sCBD
NRBP1	9	3	DEG_GSE151512_12h; DEG_GSE151512_24h; DEG_GSE151512_6h	6	DEG_GSE131565; DEG_GSE168797_Mock_CBD; DEG_GSE168797_SARS_CBD; DEG_GSE179661_HepG2; DEG_GSE179661_MHCC97H; DEG_GSE274859_LPS_24h
NT5C2	9	3	DEG_GSE151512_24h; DEG_GSE152088; DEG_GSE272113_sCBD	6	DEG_GSE131565; DEG_GSE168797_Mock_CBD; DEG_GSE168797_SARS_CBD; DEG_GSE179661_MHCC97H; DEG_GSE201508_cGAMP; DEG_GSE235310_Veh
NT5E	9	7	DEG_GSE131565; DEG_GSE151512_12h; DEG_GSE152088; DEG_GSE168797_Mock_CBD; DEG_GSE168797_SARS_CBD; DEG_GSE179661_HepG2; DEG_GSE179661_MHCC97H	2	DEG_GSE272113_CBD; DEG_GSE272113_sCBD
NTN4	9	5	DEG_GSE131565; DEG_GSE168797_Mock_CBDV; DEG_GSE179661_HepG2; DEG_GSE272113_CBD; DEG_GSE272113_sCBD	4	DEG_GSE168797_Mock_CBD; DEG_GSE168797_SARS_CBD; DEG_GSE168797_SARS_CBDV; DEG_GSE179661_MHCC97H
NUDT3	9	6	DEG_GSE131565; DEG_GSE168797_Mock_CBD; DEG_GSE168797_SARS_CBD; DEG_GSE179661_HepG2; DEG_GSE179661_MHCC97H; DEG_GSE235310_Veh	3	DEG_GSE151512_24h; DEG_GSE151512_6h; DEG_GSE201508_cGAMP
NUP153	9	4	DEG_GSE131565; DEG_GSE168797_Mock_CBD; DEG_GSE168797_SARS_CBD; DEG_GSE179661_MHCC97H	5	DEG_GSE151512_12h; DEG_GSE151512_24h; DEG_GSE151512_3h; DEG_GSE151512_6h; DEG_GSE272113_CBD
NUP155	9	7	DEG_GSE131565; DEG_GSE152088; DEG_GSE168797_Mock_CBD; DEG_GSE168797_SARS_CBD; DEG_GSE179661_HepG2; DEG_GSE179661_MHCC97H; DEG_GSE274859_LPS_24h	2	DEG_GSE151512_6h; DEG_GSE272113_CBD
NUP188	9	6	DEG_GSE131565; DEG_GSE151512_24h; DEG_GSE151512_6h; DEG_GSE168797_Mock_CBD; DEG_GSE168797_SARS_CBD; DEG_GSE179661_MHCC97H	3	DEG_GSE235310_LPS; DEG_GSE266113_WT; DEG_GSE272113_CBD
NUS1	9	1	DEG_GSE151512_24h	8	DEG_GSE131565; DEG_GSE168797_Mock_CBD; DEG_GSE168797_SARS_CBD; DEG_GSE179661_MHCC97H; DEG_GSE201508_cGAMP; DEG_GSE201508_enthanol; DEG_GSE235310_LPS; DEG_GSE272113_sCBD
NXN	9	7	DEG_GSE131565; DEG_GSE168797_Mock_CBD; DEG_GSE168797_SARS_CBD; DEG_GSE235310_Veh; DEG_GSE272113_CBD; DEG_GSE272113_sCBD; DEG_GSE274859_LPS_24h	2	DEG_GSE201508_cGAMP; DEG_GSE201508_enthanol
ORC1	9	8	DEG_GSE131565; DEG_GSE151512_12h; DEG_GSE168797_Mock_CBD; DEG_GSE168797_SARS_CBD; DEG_GSE179661_HepG2; DEG_GSE179661_MHCC97H; DEG_GSE201508_cGAMP; DEG_GSE274859_LPS_24h	1	DEG_GSE266113_WT
OSER1	9	0	NA	9	DEG_GSE131565; DEG_GSE151512_24h; DEG_GSE151512_6h; DEG_GSE168797_Mock_CBD; DEG_GSE168797_SARS_CBD; DEG_GSE179661_HepG2; DEG_GSE179661_MHCC97H; DEG_GSE201508_cGAMP; DEG_GSE274859_LPS_24h
OSTF1	9	2	DEG_GSE179661_MHCC97H; DEG_GSE235310_LPS	7	DEG_GSE131565; DEG_GSE168797_Mock_CBD; DEG_GSE168797_SARS_CBD; DEG_GSE261716_CBD0.2_28d; DEG_GSE261716_CBD10_28d; DEG_GSE261716_CBD20_28d; DEG_GSE272113_sCBD
OXSR1	9	3	DEG_GSE151512_12h; DEG_GSE151512_24h; DEG_GSE274859_LPS_24h	6	DEG_GSE131565; DEG_GSE168797_Mock_CBD; DEG_GSE168797_SARS_CBD; DEG_GSE179661_MHCC97H; DEG_GSE272113_CBD; DEG_GSE272113_sCBD
P2RY2	9	4	DEG_GSE168797_Mock_CBD; DEG_GSE168797_SARS_CBD; DEG_GSE179661_MHCC97H; DEG_GSE201508_cGAMP	5	DEG_GSE151512_12h; DEG_GSE151512_24h; DEG_GSE235310_LPS; DEG_GSE272113_CBD; DEG_GSE272113_sCBD
PACS2	9	6	DEG_GSE168797_Mock_CBD; DEG_GSE168797_SARS_CBD; DEG_GSE235310_Veh; DEG_GSE261716_CBD0.2_2d; DEG_GSE272113_CBD; DEG_GSE272113_sCBD	3	DEG_GSE151512_12h; DEG_GSE151512_24h; DEG_GSE274859_LPS_24h
PANK3	9	4	DEG_GSE152088; DEG_GSE232624_EtOH0.75_CBD0.75_12h; DEG_GSE232624_EtOH0.75_CBD0.75_6h; DEG_GSE274859_LPS_24h	5	DEG_GSE151512_24h; DEG_GSE179661_HepG2; DEG_GSE201508_cGAMP; DEG_GSE232624_Veh_CBD3_12h; DEG_GSE272113_CBD
PCYOX1L	9	8	DEG_GSE131565; DEG_GSE168797_Mock_CBD; DEG_GSE179661_HepG2; DEG_GSE179661_MHCC97H; DEG_GSE201508_cGAMP; DEG_GSE201508_enthanol; DEG_GSE235310_Veh; DEG_GSE274859_LPS_24h	1	DEG_GSE168797_Mock_CBDV
PDGFB	9	6	DEG_GSE168797_SARS_CBD; DEG_GSE168797_SARS_CBDV; DEG_GSE235310_Veh; DEG_GSE272113_CBD; DEG_GSE272113_sCBD; DEG_GSE274859_LPS_24h	3	DEG_GSE131565; DEG_GSE179661_HepG2; DEG_GSE235310_LPS
PDGFRB	9	7	DEG_GSE131565; DEG_GSE179661_HepG2; DEG_GSE261716_CBD0.2_28d; DEG_GSE261716_CBD10_28d; DEG_GSE261716_CBD20_28d; DEG_GSE272113_CBD; DEG_GSE272113_sCBD	2	DEG_GSE151512_12h; DEG_GSE151512_24h
PDGFRL	9	7	DEG_GSE151512_12h; DEG_GSE151512_24h; DEG_GSE168797_Mock_CBD; DEG_GSE179661_HepG2; DEG_GSE235310_LPS; DEG_GSE272113_CBD; DEG_GSE272113_sCBD	2	DEG_GSE131565; DEG_GSE235310_Veh
PDK1	9	5	DEG_GSE151512_12h; DEG_GSE151512_24h; DEG_GSE151512_6h; DEG_GSE274859_LPS_24h; GSE70689_CBD_NoLPS	4	DEG_GSE168797_Mock_CBD; DEG_GSE179661_MHCC97H; DEG_GSE272113_CBD; DEG_GSE272113_sCBD
PDLIM3	9	6	DEG_GSE131565; DEG_GSE151512_12h; DEG_GSE151512_24h; DEG_GSE151512_6h; DEG_GSE272113_CBD; DEG_GSE272113_sCBD	3	DEG_GSE168797_Mock_CBD; DEG_GSE168797_SARS_CBD; DEG_GSE179661_MHCC97H
PDP1	9	4	DEG_GSE151512_6h; DEG_GSE168797_Mock_CBDV; DEG_GSE201508_cGAMP; DEG_GSE235310_Veh	5	DEG_GSE131565; DEG_GSE168797_Mock_CBD; DEG_GSE168797_SARS_CBD; DEG_GSE179661_HepG2; DEG_GSE179661_MHCC97H
PDXK	9	1	DEG_GSE168797_Mock_CBD	8	DEG_GSE131565; DEG_GSE179661_HepG2; DEG_GSE179661_MHCC97H; DEG_GSE235310_LPS; DEG_GSE235310_Veh; DEG_GSE272113_CBD; DEG_GSE272113_sCBD; DEG_GSE274859_LPS_24h
PELP1	9	6	DEG_GSE131565; DEG_GSE179661_MHCC97H; DEG_GSE201508_cGAMP; DEG_GSE235310_LPS; DEG_GSE235310_Veh; DEG_GSE274859_LPS_24h	3	DEG_GSE152088; DEG_GSE179661_HepG2; DEG_GSE272113_CBD
PEX11B	9	6	DEG_GSE131565; DEG_GSE151512_24h; DEG_GSE179661_HepG2; DEG_GSE179661_MHCC97H; DEG_GSE201508_cGAMP; DEG_GSE235310_LPS	3	DEG_GSE168797_SARS_CBDV; DEG_GSE261716_CBD0.2_28d; DEG_GSE261716_CBD20_28d
PFKFB4	9	5	DEG_GSE151512_12h; DEG_GSE151512_24h; DEG_GSE151512_6h; DEG_GSE168797_SARS_CBD; DEG_GSE168797_SARS_CBDV	4	DEG_GSE131565; DEG_GSE201508_cGAMP; DEG_GSE235310_LPS; DEG_GSE235310_Veh
PFKM	9	8	DEG_GSE131565; DEG_GSE179661_MHCC97H; DEG_GSE261716_CBD0.2_28d; DEG_GSE261716_CBD20_28d; DEG_GSE261716_CBD20_2d; DEG_GSE272113_CBD; DEG_GSE272113_sCBD; DEG_GSE274859_LPS_24h	1	DEG_GSE151512_24h
PGRMC2	9	2	DEG_GSE168797_Mock_CBD; DEG_GSE179661_HepG2	7	DEG_GSE131565; DEG_GSE151512_24h; DEG_GSE151512_6h; DEG_GSE179661_MHCC97H; DEG_GSE235310_LPS; DEG_GSE272113_CBD; DEG_GSE272113_sCBD
PHACTR4	9	5	DEG_GSE151512_24h; DEG_GSE168797_Mock_CBD; DEG_GSE168797_SARS_CBD; DEG_GSE232624_EtOH0.75_CBD0.75_6h; DEG_GSE261716_CBD10_28d	4	DEG_GSE131565; DEG_GSE179661_MHCC97H; DEG_GSE232624_EtOH0.25_CBD0.75_12h; DEG_GSE235310_LPS
PHF13	9	4	DEG_GSE168797_Mock_CBD; DEG_GSE168797_SARS_CBD; DEG_GSE261716_CBD20_28d; DEG_GSE261716_CBD20_2d	5	DEG_GSE131565; DEG_GSE179661_HepG2; DEG_GSE179661_MHCC97H; DEG_GSE272113_CBD; DEG_GSE272113_sCBD
PHTF2	9	7	DEG_GSE131565; DEG_GSE168797_Mock_CBD; DEG_GSE179661_MHCC97H; DEG_GSE235310_Veh; DEG_GSE274859_LPS_24h; GSE70689_CBD_NoLPS; GSE70689_CBD_wLPS	2	DEG_GSE201508_cGAMP; DEG_GSE235310_LPS
PIGP	9	3	DEG_GSE179661_HepG2; DEG_GSE272113_CBD; DEG_GSE272113_sCBD	6	DEG_GSE168797_Mock_CBD; DEG_GSE168797_SARS_CBD; DEG_GSE261716_CBD0.2_28d; DEG_GSE261716_CBD10_28d; DEG_GSE261716_CBD20_28d; DEG_GSE261716_CBD20_2d
PIGU	9	4	DEG_GSE131565; DEG_GSE179661_HepG2; DEG_GSE179661_MHCC97H; DEG_GSE261716_CBD20_28d	5	DEG_GSE151512_24h; DEG_GSE151512_6h; DEG_GSE168797_SARS_CBDV; DEG_GSE272113_sCBD; DEG_GSE274859_LPS_24h
PIK3R2	9	8	DEG_GSE131565; DEG_GSE151512_12h; DEG_GSE151512_24h; DEG_GSE168797_Mock_CBD; DEG_GSE168797_SARS_CBD; DEG_GSE179661_HepG2; DEG_GSE179661_MHCC97H; DEG_GSE261716_CBD20_2d	1	DEG_GSE152088
PIM1	9	0	NA	9	DEG_GSE131565; DEG_GSE151512_24h; DEG_GSE168797_Mock_CBD; DEG_GSE168797_SARS_CBD; DEG_GSE179661_HepG2; DEG_GSE179661_MHCC97H; DEG_GSE235310_LPS; DEG_GSE235310_Veh; DEG_GSE274859_LPS_24h
PITPNC1	9	5	DEG_GSE151512_12h; DEG_GSE151512_6h; DEG_GSE272113_CBD; DEG_GSE272113_sCBD; DEG_GSE274859_LPS_24h	4	DEG_GSE131565; DEG_GSE168797_Mock_CBD; DEG_GSE168797_SARS_CBD; DEG_GSE235310_LPS
PLCB3	9	7	DEG_GSE131565; DEG_GSE168797_Mock_CBD; DEG_GSE168797_SARS_CBD; DEG_GSE179661_MHCC97H; DEG_GSE235310_LPS; DEG_GSE235310_Veh; DEG_GSE261716_CBD20_28d	2	DEG_GSE272113_CBD; DEG_GSE272113_sCBD
PLEC	9	5	DEG_GSE168797_SARS_CBD; DEG_GSE201508_enthanol; DEG_GSE235310_LPS; DEG_GSE261716_CBD0.2_2d; DEG_GSE274859_LPS_24h	4	DEG_GSE151512_24h; DEG_GSE152088; DEG_GSE179661_HepG2; DEG_GSE232624_EtOH0.75_CBD0.75_6h
PLEKHA5	9	5	DEG_GSE168797_Mock_CBD; DEG_GSE168797_SARS_CBD; DEG_GSE168797_SARS_CBDV; DEG_GSE235310_LPS; DEG_GSE235310_Veh	4	DEG_GSE131565; DEG_GSE151512_24h; DEG_GSE179661_MHCC97H; DEG_GSE274859_LPS_24h
PLEKHG3	9	6	DEG_GSE168797_Mock_CBD; DEG_GSE168797_SARS_CBD; DEG_GSE168797_SARS_CBDV; DEG_GSE179661_MHCC97H; DEG_GSE232624_EtOH0.25_CBD0.75_12h; DEG_GSE274859_LPS_24h	3	DEG_GSE151512_24h; DEG_GSE179661_HepG2; DEG_GSE235310_LPS
PLK1	9	9	DEG_GSE131565; DEG_GSE151512_12h; DEG_GSE151512_6h; DEG_GSE168797_Mock_CBD; DEG_GSE168797_SARS_CBD; DEG_GSE179661_HepG2; DEG_GSE179661_MHCC97H; DEG_GSE232624_EtOH0.75_CBD0.75_12h; DEG_GSE274859_LPS_24h	0	NA
PLK3	9	0	NA	9	DEG_GSE151512_12h; DEG_GSE151512_24h; DEG_GSE168797_Mock_CBD; DEG_GSE179661_HepG2; DEG_GSE235310_LPS; DEG_GSE235310_Veh; DEG_GSE272113_CBD; DEG_GSE272113_sCBD; DEG_GSE274859_LPS_24h
PLPP2	9	1	DEG_GSE179661_MHCC97H	8	DEG_GSE131565; DEG_GSE151512_12h; DEG_GSE151512_24h; DEG_GSE168797_Mock_CBD; DEG_GSE168797_SARS_CBD; DEG_GSE168797_SARS_CBDV; DEG_GSE272113_CBD; DEG_GSE272113_sCBD
PMEPA1	9	7	DEG_GSE131565; DEG_GSE168797_Mock_CBD; DEG_GSE235310_Veh; DEG_GSE261716_CBD10_28d; DEG_GSE261716_CBD20_28d; DEG_GSE272113_CBD; DEG_GSE272113_sCBD	2	DEG_GSE179661_HepG2; DEG_GSE179661_MHCC97H
PMP22	9	1	DEG_GSE131565	8	DEG_GSE151512_24h; DEG_GSE151512_6h; DEG_GSE168797_Mock_CBD; DEG_GSE179661_MHCC97H; DEG_GSE235310_LPS; DEG_GSE235310_Veh; DEG_GSE272113_sCBD; DEG_GSE274435_DMSO_24h
PNP	9	2	DEG_GSE201508_cGAMP; DEG_GSE261716_CBD20_28d	7	DEG_GSE131565; DEG_GSE168797_Mock_CBD; DEG_GSE168797_SARS_CBD; DEG_GSE168797_SARS_CBDV; DEG_GSE179661_HepG2; DEG_GSE235310_LPS; DEG_GSE266113_WT
PNPT1	9	4	DEG_GSE131565; DEG_GSE152088; DEG_GSE179661_MHCC97H; DEG_GSE201508_cGAMP	5	DEG_GSE151512_12h; DEG_GSE151512_24h; DEG_GSE232624_EtOH0.25_CBD0.75_12h; DEG_GSE235310_LPS; DEG_GSE261716_CBD20_28d
PODXL	9	5	DEG_GSE151512_12h; DEG_GSE151512_24h; DEG_GSE151512_6h; DEG_GSE168797_Mock_CBDV; DEG_GSE179661_MHCC97H	4	DEG_GSE131565; DEG_GSE266113_WT; DEG_GSE272113_CBD; DEG_GSE272113_sCBD
POGLUT3	9	6	DEG_GSE131565; DEG_GSE168797_Mock_CBD; DEG_GSE168797_SARS_CBD; DEG_GSE179661_HepG2; DEG_GSE179661_MHCC97H; DEG_GSE235310_Veh	3	DEG_GSE168797_SARS_CBDV; DEG_GSE235310_LPS; DEG_GSE274435_DMSO_24h
POLA2	9	8	DEG_GSE131565; DEG_GSE151512_24h; DEG_GSE168797_Mock_CBD; DEG_GSE168797_SARS_CBD; DEG_GSE179661_HepG2; DEG_GSE179661_MHCC97H; DEG_GSE201508_cGAMP; DEG_GSE274859_LPS_24h	1	DEG_GSE235310_LPS
POLD2	9	6	DEG_GSE131565; DEG_GSE168797_Mock_CBD; DEG_GSE168797_SARS_CBD; DEG_GSE179661_MHCC97H; DEG_GSE235310_Veh; DEG_GSE274859_LPS_24h	3	DEG_GSE151512_24h; DEG_GSE151512_6h; DEG_GSE235310_LPS
POLD4	9	1	DEG_GSE201508_cGAMP	8	DEG_GSE131565; DEG_GSE168797_Mock_CBD; DEG_GSE168797_SARS_CBD; DEG_GSE179661_HepG2; DEG_GSE179661_MHCC97H; DEG_GSE235310_LPS; DEG_GSE272113_CBD; DEG_GSE272113_sCBD
POLR2E	9	5	DEG_GSE131565; DEG_GSE151512_24h; DEG_GSE168797_Mock_CBD; DEG_GSE179661_MHCC97H; DEG_GSE274859_LPS_24h	4	DEG_GSE179661_HepG2; DEG_GSE232624_EtOH0.75_CBD0.75_6h; DEG_GSE261716_CBD0.2_2d; DEG_GSE272113_sCBD
POLR3H	9	7	DEG_GSE131565; DEG_GSE151512_24h; DEG_GSE168797_Mock_CBDV; DEG_GSE179661_HepG2; DEG_GSE179661_MHCC97H; DEG_GSE201508_cGAMP; DEG_GSE274859_LPS_24h	2	DEG_GSE272113_CBD; DEG_GSE272113_sCBD
PON2	9	8	DEG_GSE131565; DEG_GSE168797_Mock_CBD; DEG_GSE168797_SARS_CBD; DEG_GSE179661_HepG2; DEG_GSE179661_MHCC97H; DEG_GSE235310_LPS; DEG_GSE235310_Veh; DEG_GSE272113_CBD	1	DEG_GSE168797_Mock_CBDV
POU2F2	9	4	DEG_GSE131565; DEG_GSE168797_SARS_CBDV; DEG_GSE235310_Veh; DEG_GSE274859_LPS_24h	5	DEG_GSE151512_24h; DEG_GSE168797_Mock_CBD; DEG_GSE179661_HepG2; DEG_GSE179661_MHCC97H; DEG_GSE235310_LPS
PPFIA4	9	6	DEG_GSE151512_24h; DEG_GSE151512_6h; DEG_GSE168797_Mock_CBD; DEG_GSE168797_SARS_CBD; DEG_GSE272113_CBD; DEG_GSE272113_sCBD	3	DEG_GSE131565; DEG_GSE266113_mutNdufs4; DEG_GSE274859_LPS_24h
PPL	9	6	DEG_GSE168797_Mock_CBD; DEG_GSE168797_SARS_CBD; DEG_GSE168797_SARS_CBDV; DEG_GSE235310_LPS; DEG_GSE272113_CBD; DEG_GSE272113_sCBD	3	DEG_GSE131565; DEG_GSE152088; DEG_GSE179661_HepG2
PPP1R14B	9	8	DEG_GSE131565; DEG_GSE151512_12h; DEG_GSE151512_24h; DEG_GSE168797_Mock_CBD; DEG_GSE168797_SARS_CBD; DEG_GSE179661_MHCC97H; DEG_GSE201508_cGAMP; DEG_GSE274859_LPS_24h	1	DEG_GSE179661_HepG2
PPP1R37	9	3	DEG_GSE151512_12h; DEG_GSE261716_CBD20_28d; DEG_GSE272113_CBD	6	DEG_GSE152088; DEG_GSE168797_SARS_CBD; DEG_GSE179661_HepG2; DEG_GSE179661_MHCC97H; DEG_GSE235310_LPS; DEG_GSE235310_Veh
PPP1R3B	9	4	DEG_GSE131565; DEG_GSE151512_12h; DEG_GSE151512_24h; DEG_GSE235310_Veh	5	DEG_GSE168797_Mock_CBD; DEG_GSE201508_cGAMP; DEG_GSE272113_CBD; DEG_GSE272113_sCBD; GSE70689_CBD_wLPS
PPRC1	9	3	DEG_GSE131565; DEG_GSE152088; DEG_GSE168797_SARS_CBD	6	DEG_GSE151512_12h; DEG_GSE151512_24h; DEG_GSE151512_6h; DEG_GSE179661_HepG2; DEG_GSE272113_CBD; DEG_GSE272113_sCBD
PRAG1	9	7	DEG_GSE151512_24h; DEG_GSE168797_Mock_CBD; DEG_GSE168797_Mock_CBDV; DEG_GSE168797_SARS_CBD; DEG_GSE179661_MHCC97H; DEG_GSE261716_CBD0.2_28d; DEG_GSE274859_LPS_24h	2	DEG_GSE131565; DEG_GSE179661_HepG2
PRDX5	9	0	NA	9	DEG_GSE131565; DEG_GSE152088; DEG_GSE168797_SARS_CBD; DEG_GSE168797_SARS_CBDV; DEG_GSE179661_HepG2; DEG_GSE179661_MHCC97H; DEG_GSE261716_CBD0.2_2d; DEG_GSE272113_CBD; DEG_GSE272113_sCBD
PREX1	9	2	DEG_GSE131565; DEG_GSE168797_Mock_CBDV	7	DEG_GSE151512_24h; DEG_GSE168797_Mock_CBD; DEG_GSE232624_Veh_CBD0.75_12h; DEG_GSE232624_Veh_CBD3_12h; DEG_GSE235310_LPS; DEG_GSE272113_CBD; DEG_GSE272113_sCBD
PRIM1	9	6	DEG_GSE131565; DEG_GSE168797_Mock_CBD; DEG_GSE168797_SARS_CBD; DEG_GSE179661_HepG2; DEG_GSE179661_MHCC97H; DEG_GSE274859_LPS_24h	3	DEG_GSE151512_3h; DEG_GSE151512_6h; DEG_GSE266113_WT
PRKCE	9	2	DEG_GSE168797_SARS_CBDV; DEG_GSE232624_EtOH0.75_CBD0.75_6h	7	DEG_GSE131565; DEG_GSE151512_24h; DEG_GSE168797_Mock_CBD; DEG_GSE179661_HepG2; DEG_GSE179661_MHCC97H; DEG_GSE235310_LPS; DEG_GSE235310_Veh
PRMT7	9	7	DEG_GSE131565; DEG_GSE151512_24h; DEG_GSE168797_Mock_CBD; DEG_GSE168797_SARS_CBD; DEG_GSE179661_HepG2; DEG_GSE179661_MHCC97H; DEG_GSE274859_LPS_24h	2	DEG_GSE261716_CBD0.2_28d; DEG_GSE261716_CBD20_28d
PSME4	9	2	DEG_GSE152088; DEG_GSE272113_sCBD	7	DEG_GSE131565; DEG_GSE168797_Mock_CBD; DEG_GSE168797_SARS_CBD; DEG_GSE179661_HepG2; DEG_GSE179661_MHCC97H; DEG_GSE201508_cGAMP; DEG_GSE274859_LPS_24h
PSPC1	9	9	DEG_GSE131565; DEG_GSE151512_12h; DEG_GSE151512_24h; DEG_GSE168797_Mock_CBD; DEG_GSE168797_SARS_CBD; DEG_GSE179661_HepG2; DEG_GSE201508_cGAMP; DEG_GSE235310_LPS; DEG_GSE274859_LPS_24h	0	NA
PTEN	9	4	DEG_GSE152088; DEG_GSE168797_SARS_CBDV; DEG_GSE179661_HepG2; DEG_GSE235310_LPS	5	DEG_GSE131565; DEG_GSE151512_12h; DEG_GSE151512_24h; DEG_GSE168797_Mock_CBD; DEG_GSE179661_MHCC97H
PTK2B	9	7	DEG_GSE179661_HepG2; DEG_GSE201508_cGAMP; DEG_GSE235310_LPS; DEG_GSE261716_CBD20_28d; DEG_GSE272113_CBD; DEG_GSE272113_sCBD; DEG_GSE274859_LPS_24h	2	DEG_GSE131565; DEG_GSE168797_SARS_CBD
PTPRE	9	1	DEG_GSE274859_LPS_24h	8	DEG_GSE131565; DEG_GSE151512_12h; DEG_GSE151512_24h; DEG_GSE168797_Mock_CBD; DEG_GSE201508_cGAMP; DEG_GSE201508_enthanol; DEG_GSE232624_EtOH0.75_CBD0.75_6h; DEG_GSE235310_LPS
PTPRJ	9	4	DEG_GSE168797_Mock_CBD; DEG_GSE168797_SARS_CBD; DEG_GSE235310_Veh; DEG_GSE274859_LPS_24h	5	DEG_GSE151512_12h; DEG_GSE151512_24h; DEG_GSE235310_LPS; DEG_GSE272113_CBD; DEG_GSE272113_sCBD
PWWP2B	9	1	DEG_GSE201508_cGAMP	8	DEG_GSE131565; DEG_GSE152088; DEG_GSE168797_Mock_CBD; DEG_GSE168797_SARS_CBD; DEG_GSE179661_HepG2; DEG_GSE179661_MHCC97H; DEG_GSE272113_CBD; DEG_GSE274859_LPS_24h
PXK	9	2	DEG_GSE232624_Veh_CBD3_12h; DEG_GSE272113_sCBD	7	DEG_GSE151512_12h; DEG_GSE151512_24h; DEG_GSE168797_Mock_CBD; DEG_GSE179661_MHCC97H; DEG_GSE232624_EtOH0.25_CBD0.75_12h; DEG_GSE235310_LPS; DEG_GSE261716_CBD0.2_28d
PYGO2	9	9	DEG_GSE151512_12h; DEG_GSE151512_24h; DEG_GSE151512_6h; DEG_GSE168797_Mock_CBD; DEG_GSE168797_SARS_CBD; DEG_GSE179661_MHCC97H; DEG_GSE201508_cGAMP; DEG_GSE235310_LPS; DEG_GSE261716_CBD20_28d	0	NA
QPRT	9	6	DEG_GSE131565; DEG_GSE179661_MHCC97H; DEG_GSE201508_cGAMP; DEG_GSE235310_LPS; DEG_GSE235310_Veh; DEG_GSE274859_LPS_24h	3	DEG_GSE151512_24h; DEG_GSE152088; DEG_GSE179661_HepG2
RAB1A	9	0	NA	9	DEG_GSE131565; DEG_GSE168797_Mock_CBD; DEG_GSE168797_SARS_CBD; DEG_GSE179661_MHCC97H; DEG_GSE201508_cGAMP; DEG_GSE201508_enthanol; DEG_GSE235310_LPS; DEG_GSE235310_Veh; DEG_GSE274859_LPS_24h
RAB1B	9	7	DEG_GSE151512_12h; DEG_GSE151512_24h; DEG_GSE168797_Mock_CBD; DEG_GSE201508_cGAMP; DEG_GSE235310_Veh; DEG_GSE272113_sCBD; DEG_GSE274859_LPS_24h	2	DEG_GSE152088; DEG_GSE261716_CBD10_28d
RAB29	9	4	DEG_GSE168797_Mock_CBDV; DEG_GSE179661_HepG2; DEG_GSE179661_MHCC97H; DEG_GSE235310_LPS	5	DEG_GSE168797_Mock_CBD; DEG_GSE168797_SARS_CBD; DEG_GSE168797_SARS_CBDV; DEG_GSE201508_enthanol; DEG_GSE274859_LPS_24h
RAB43	9	0	NA	9	DEG_GSE131565; DEG_GSE168797_Mock_CBD; DEG_GSE179661_HepG2; DEG_GSE179661_MHCC97H; DEG_GSE235310_LPS; DEG_GSE235310_Veh; DEG_GSE261716_CBD0.2_28d; DEG_GSE261716_CBD10_28d; DEG_GSE272113_sCBD
RAB7A	9	0	NA	9	DEG_GSE131565; DEG_GSE168797_Mock_CBD; DEG_GSE168797_SARS_CBD; DEG_GSE179661_HepG2; DEG_GSE179661_MHCC97H; DEG_GSE201508_cGAMP; DEG_GSE261716_CBD20_28d; DEG_GSE272113_CBD; DEG_GSE274859_LPS_24h
RAB7B	9	5	DEG_GSE131565; DEG_GSE179661_MHCC97H; DEG_GSE201508_cGAMP; DEG_GSE235310_LPS; DEG_GSE235310_Veh	4	DEG_GSE168797_Mock_CBD; DEG_GSE179661_HepG2; DEG_GSE272113_CBD; DEG_GSE272113_sCBD
RAD50	9	8	DEG_GSE131565; DEG_GSE152088; DEG_GSE179661_HepG2; DEG_GSE179661_MHCC97H; DEG_GSE201508_enthanol; DEG_GSE235310_LPS; DEG_GSE235310_Veh; DEG_GSE274859_LPS_24h	1	DEG_GSE151512_24h
RAD51AP1	9	6	DEG_GSE131565; DEG_GSE168797_Mock_CBD; DEG_GSE168797_SARS_CBD; DEG_GSE179661_HepG2; DEG_GSE270378_CBD1.5_24h; DEG_GSE274859_LPS_24h	3	DEG_GSE235310_LPS; DEG_GSE235310_Veh; DEG_GSE272113_CBD
RALGAPA2	9	7	DEG_GSE151512_12h; DEG_GSE151512_24h; DEG_GSE151512_6h; DEG_GSE179661_HepG2; DEG_GSE201508_cGAMP; DEG_GSE201508_enthanol; DEG_GSE274859_LPS_24h	2	DEG_GSE131565; DEG_GSE261716_CBD0.2_28d
RAPH1	9	1	DEG_GSE232624_EtOH0.75_CBD0.75_12h	8	DEG_GSE131565; DEG_GSE151512_24h; DEG_GSE168797_Mock_CBD; DEG_GSE168797_SARS_CBD; DEG_GSE179661_HepG2; DEG_GSE179661_MHCC97H; DEG_GSE261716_CBD20_2d; DEG_GSE274859_LPS_24h
RASSF4	9	5	DEG_GSE179661_HepG2; DEG_GSE201508_cGAMP; DEG_GSE201508_enthanol; DEG_GSE235310_LPS; DEG_GSE235310_Veh	4	DEG_GSE168797_Mock_CBD; DEG_GSE274435_DMSO_24h; DEG_GSE274435_EtOH_24h; GSE70689_CBD_NoLPS
RBCK1	9	1	DEG_GSE201508_cGAMP	8	DEG_GSE131565; DEG_GSE151512_24h; DEG_GSE168797_Mock_CBD; DEG_GSE168797_SARS_CBD; DEG_GSE168797_SARS_CBDV; DEG_GSE179661_HepG2; DEG_GSE179661_MHCC97H; DEG_GSE235310_Veh
RET	9	3	DEG_GSE201508_cGAMP; DEG_GSE201508_enthanol; DEG_GSE235310_LPS	6	DEG_GSE151512_12h; DEG_GSE151512_24h; DEG_GSE151512_6h; DEG_GSE168797_Mock_CBD; DEG_GSE168797_SARS_CBD; DEG_GSE168797_SARS_CBDV
RFC3	9	8	DEG_GSE131565; DEG_GSE151512_12h; DEG_GSE151512_24h; DEG_GSE168797_Mock_CBD; DEG_GSE168797_SARS_CBD; DEG_GSE179661_HepG2; DEG_GSE179661_MHCC97H; DEG_GSE201508_cGAMP	1	DEG_GSE266113_WT
RFC5	9	6	DEG_GSE131565; DEG_GSE151512_24h; DEG_GSE168797_Mock_CBD; DEG_GSE168797_SARS_CBD; DEG_GSE179661_HepG2; DEG_GSE274859_LPS_24h	3	DEG_GSE235310_LPS; DEG_GSE235310_Veh; DEG_GSE266113_WT
RHEB	9	0	NA	9	DEG_GSE131565; DEG_GSE151512_24h; DEG_GSE151512_6h; DEG_GSE168797_Mock_CBD; DEG_GSE168797_SARS_CBD; DEG_GSE179661_HepG2; DEG_GSE179661_MHCC97H; DEG_GSE235310_LPS; DEG_GSE235310_Veh
RIN2	9	7	DEG_GSE131565; DEG_GSE179661_MHCC97H; DEG_GSE272113_CBD; DEG_GSE272113_sCBD; DEG_GSE274859_LPS_24h; GSE70689_CBD_NoLPS; GSE70689_CBD_wLPS	2	DEG_GSE235310_LPS; DEG_GSE235310_Veh
RIT1	9	0	NA	9	DEG_GSE131565; DEG_GSE168797_Mock_CBD; DEG_GSE179661_HepG2; DEG_GSE179661_MHCC97H; DEG_GSE201508_cGAMP; DEG_GSE201508_enthanol; DEG_GSE274859_LPS_24h; GSE70689_CBD_NoLPS; GSE70689_CBD_wLPS
RMC1	9	1	DEG_GSE168797_SARS_CBDV	8	DEG_GSE131565; DEG_GSE151512_24h; DEG_GSE179661_HepG2; DEG_GSE179661_MHCC97H; DEG_GSE201508_cGAMP; DEG_GSE235310_LPS; DEG_GSE235310_Veh; DEG_GSE274859_LPS_24h
RNF19B	9	1	DEG_GSE274859_LPS_24h	8	DEG_GSE131565; DEG_GSE151512_24h; DEG_GSE168797_Mock_CBD; DEG_GSE168797_SARS_CBD; DEG_GSE179661_HepG2; DEG_GSE179661_MHCC97H; DEG_GSE201508_cGAMP; DEG_GSE201508_enthanol
RNF26	9	7	DEG_GSE131565; DEG_GSE168797_Mock_CBD; DEG_GSE168797_SARS_CBD; DEG_GSE179661_HepG2; DEG_GSE179661_MHCC97H; DEG_GSE261716_CBD20_28d; DEG_GSE274859_LPS_24h	2	DEG_GSE201508_cGAMP; DEG_GSE272113_sCBD
RNFT1	9	1	DEG_GSE151512_24h	8	DEG_GSE131565; DEG_GSE168797_Mock_CBD; DEG_GSE168797_SARS_CBD; DEG_GSE179661_MHCC97H; DEG_GSE235310_Veh; DEG_GSE272113_CBD; DEG_GSE272113_sCBD; DEG_GSE274859_LPS_24h
RPL10	9	0	NA	9	DEG_GSE131565; DEG_GSE151512_24h; DEG_GSE152088; DEG_GSE168797_Mock_CBD; DEG_GSE168797_SARS_CBD; DEG_GSE179661_HepG2; DEG_GSE179661_MHCC97H; DEG_GSE201508_cGAMP; DEG_GSE272113_CBD
RPN1	9	0	NA	9	DEG_GSE131565; DEG_GSE168797_Mock_CBD; DEG_GSE168797_SARS_CBD; DEG_GSE201508_cGAMP; DEG_GSE201508_enthanol; DEG_GSE235310_LPS; DEG_GSE272113_CBD; DEG_GSE272113_sCBD; DEG_GSE274435_DMSO_24h
RPN2	9	2	DEG_GSE151512_24h; DEG_GSE261716_CBD20_28d	7	DEG_GSE131565; DEG_GSE168797_SARS_CBD; DEG_GSE168797_SARS_CBDV; DEG_GSE235310_LPS; DEG_GSE235310_Veh; DEG_GSE272113_CBD; DEG_GSE272113_sCBD
RPS12	9	0	NA	9	DEG_GSE151512_24h; DEG_GSE152088; DEG_GSE168797_Mock_CBD; DEG_GSE179661_HepG2; DEG_GSE179661_MHCC97H; DEG_GSE201508_enthanol; DEG_GSE235310_Veh; DEG_GSE261716_CBD0.2_2d; DEG_GSE261716_CBD20_2d
RPS6KA2	9	4	DEG_GSE179661_HepG2; DEG_GSE261716_CBD0.2_28d; DEG_GSE261716_CBD10_28d; DEG_GSE261716_CBD20_28d	5	DEG_GSE168797_Mock_CBD; DEG_GSE201508_cGAMP; DEG_GSE235310_LPS; DEG_GSE235310_Veh; DEG_GSE274859_LPS_24h
RRAGC	9	1	DEG_GSE235310_LPS	8	DEG_GSE131565; DEG_GSE168797_Mock_CBD; DEG_GSE168797_SARS_CBD; DEG_GSE179661_HepG2; DEG_GSE179661_MHCC97H; DEG_GSE201508_cGAMP; DEG_GSE274435_DMSO_24h; DEG_GSE274859_LPS_24h
RRAGD	9	1	DEG_GSE168797_Mock_CBDV	8	DEG_GSE131565; DEG_GSE168797_Mock_CBD; DEG_GSE168797_SARS_CBD; DEG_GSE179661_MHCC97H; DEG_GSE201508_cGAMP; DEG_GSE201508_enthanol; DEG_GSE235310_LPS; DEG_GSE235310_Veh
RRP1B	9	8	DEG_GSE131565; DEG_GSE151512_24h; DEG_GSE152088; DEG_GSE168797_Mock_CBD; DEG_GSE168797_SARS_CBD; DEG_GSE179661_MHCC97H; DEG_GSE235310_Veh; DEG_GSE274859_LPS_24h	1	DEG_GSE266113_WT
RRP9	9	3	DEG_GSE131565; DEG_GSE179661_MHCC97H; DEG_GSE274859_LPS_24h	6	DEG_GSE151512_12h; DEG_GSE151512_24h; DEG_GSE179661_HepG2; DEG_GSE235310_LPS; DEG_GSE272113_CBD; DEG_GSE272113_sCBD
RSL24D1	9	1	DEG_GSE152088	8	DEG_GSE151512_12h; DEG_GSE151512_24h; DEG_GSE151512_3h; DEG_GSE151512_6h; DEG_GSE168797_Mock_CBD; DEG_GSE168797_SARS_CBD; DEG_GSE179661_HepG2; DEG_GSE179661_MHCC97H
RTKN	9	7	DEG_GSE131565; DEG_GSE151512_24h; DEG_GSE235310_LPS; DEG_GSE235310_Veh; DEG_GSE261716_CBD20_28d; DEG_GSE272113_CBD; DEG_GSE274859_LPS_24h	2	DEG_GSE179661_HepG2; DEG_GSE179661_MHCC97H
RTL6	9	8	DEG_GSE131565; DEG_GSE151512_12h; DEG_GSE151512_24h; DEG_GSE151512_6h; DEG_GSE168797_Mock_CBD; DEG_GSE168797_SARS_CBD; DEG_GSE201508_cGAMP; DEG_GSE275998_CDB20	1	DEG_GSE235310_LPS
RTN4R	9	2	DEG_GSE168797_Mock_CBD; DEG_GSE201508_cGAMP	7	DEG_GSE131565; DEG_GSE151512_24h; DEG_GSE179661_HepG2; DEG_GSE179661_MHCC97H; DEG_GSE235310_LPS; DEG_GSE235310_Veh; DEG_GSE274859_LPS_24h
RTN4RL2	9	4	DEG_GSE168797_Mock_CBD; DEG_GSE168797_SARS_CBD; DEG_GSE168797_SARS_CBDV; DEG_GSE235310_Veh	5	DEG_GSE151512_6h; DEG_GSE168797_Mock_CBDV; DEG_GSE235310_LPS; DEG_GSE272113_CBD; DEG_GSE272113_sCBD
RWDD2B	9	4	DEG_GSE131565; DEG_GSE152088; DEG_GSE179661_HepG2; DEG_GSE235310_LPS	5	DEG_GSE151512_12h; DEG_GSE151512_24h; DEG_GSE151512_6h; DEG_GSE168797_Mock_CBD; DEG_GSE168797_SARS_CBD
RXRA	9	3	DEG_GSE168797_Mock_CBDV; DEG_GSE179661_MHCC97H; DEG_GSE201508_cGAMP	6	DEG_GSE152088; DEG_GSE168797_SARS_CBDV; DEG_GSE179661_HepG2; DEG_GSE235310_LPS; DEG_GSE272113_CBD; DEG_GSE274859_LPS_24h
S100A4	9	8	DEG_GSE131565; DEG_GSE151512_24h; DEG_GSE168797_Mock_CBD; DEG_GSE168797_SARS_CBD; DEG_GSE179661_MHCC97H; DEG_GSE235310_LPS; DEG_GSE235310_Veh; DEG_GSE274859_LPS_24h	1	DEG_GSE179661_HepG2
S1PR1	9	2	DEG_GSE235310_LPS; DEG_GSE266113_mutNdufs4	7	DEG_GSE168797_Mock_CBD; DEG_GSE168797_SARS_CBD; DEG_GSE179661_HepG2; DEG_GSE179661_MHCC97H; DEG_GSE272113_CBD; DEG_GSE272113_sCBD; DEG_GSE274859_LPS_24h
SARAF	9	2	DEG_GSE261716_CBD20_28d; DEG_GSE261716_CBD20_2d	7	DEG_GSE131565; DEG_GSE168797_Mock_CBD; DEG_GSE168797_SARS_CBD; DEG_GSE179661_MHCC97H; DEG_GSE201508_cGAMP; DEG_GSE201508_enthanol; DEG_GSE274859_LPS_24h
SAV1	9	0	NA	9	DEG_GSE131565; DEG_GSE168797_Mock_CBD; DEG_GSE168797_SARS_CBD; DEG_GSE179661_HepG2; DEG_GSE179661_MHCC97H; DEG_GSE235310_LPS; DEG_GSE235310_Veh; DEG_GSE272113_CBD; DEG_GSE272113_sCBD
SCARA3	9	8	DEG_GSE131565; DEG_GSE151512_12h; DEG_GSE151512_24h; DEG_GSE151512_6h; DEG_GSE168797_Mock_CBD; DEG_GSE168797_SARS_CBD; DEG_GSE179661_HepG2; DEG_GSE179661_MHCC97H	1	DEG_GSE152088
SCFD1	9	2	DEG_GSE272113_CBD; DEG_GSE272113_sCBD	7	DEG_GSE131565; DEG_GSE151512_24h; DEG_GSE168797_Mock_CBD; DEG_GSE168797_SARS_CBD; DEG_GSE179661_MHCC97H; DEG_GSE261716_CBD20_28d; DEG_GSE274859_LPS_24h
SDC1	9	4	DEG_GSE168797_Mock_CBD; DEG_GSE179661_HepG2; DEG_GSE179661_MHCC97H; DEG_GSE274859_LPS_24h	5	DEG_GSE131565; DEG_GSE152088; DEG_GSE235310_LPS; DEG_GSE235310_Veh; DEG_GSE272113_CBD
SDC3	9	8	DEG_GSE131565; DEG_GSE151512_12h; DEG_GSE151512_6h; DEG_GSE168797_Mock_CBD; DEG_GSE179661_MHCC97H; DEG_GSE235310_LPS; DEG_GSE261716_CBD0.2_2d; DEG_GSE266113_WT	1	DEG_GSE151512_24h
SDC4	9	1	DEG_GSE274859_LPS_24h	8	DEG_GSE131565; DEG_GSE151512_12h; DEG_GSE151512_24h; DEG_GSE168797_Mock_CBD; DEG_GSE179661_HepG2; DEG_GSE179661_MHCC97H; DEG_GSE272113_CBD; DEG_GSE272113_sCBD
SEC61G	9	3	DEG_GSE151512_24h; DEG_GSE152088; DEG_GSE179661_HepG2	6	DEG_GSE131565; DEG_GSE168797_Mock_CBD; DEG_GSE168797_SARS_CBD; DEG_GSE179661_MHCC97H; DEG_GSE272113_sCBD; DEG_GSE274859_LPS_24h
SEC63	9	2	DEG_GSE261716_CBD0.2_28d; DEG_GSE261716_CBD20_28d	7	DEG_GSE131565; DEG_GSE151512_24h; DEG_GSE168797_Mock_CBD; DEG_GSE168797_SARS_CBD; DEG_GSE179661_MHCC97H; DEG_GSE201508_cGAMP; DEG_GSE235310_LPS
SELPLG	9	7	DEG_GSE151512_24h; DEG_GSE168797_SARS_CBD; DEG_GSE168797_SARS_CBDV; DEG_GSE179661_MHCC97H; DEG_GSE235310_LPS; DEG_GSE235310_Veh; DEG_GSE274859_LPS_24h	2	DEG_GSE131565; DEG_GSE168797_Mock_CBD
SEMA3C	9	5	DEG_GSE131565; DEG_GSE151512_24h; DEG_GSE168797_Mock_CBD; DEG_GSE168797_SARS_CBD; DEG_GSE232624_EtOH0.75_CBD0.75_6h	4	DEG_GSE201508_cGAMP; DEG_GSE235310_Veh; DEG_GSE272113_CBD; DEG_GSE274435_DMSO_24h
SEMA6B	9	5	DEG_GSE168797_Mock_CBD; DEG_GSE168797_SARS_CBD; DEG_GSE168797_SARS_CBDV; DEG_GSE179661_HepG2; DEG_GSE274859_LPS_24h	4	DEG_GSE235310_LPS; DEG_GSE235310_Veh; DEG_GSE272113_CBD; DEG_GSE272113_sCBD
SEPHS1	9	8	DEG_GSE131565; DEG_GSE168797_Mock_CBD; DEG_GSE168797_SARS_CBD; DEG_GSE179661_MHCC97H; DEG_GSE201508_cGAMP; DEG_GSE235310_LPS; DEG_GSE235310_Veh; DEG_GSE274859_LPS_24h	1	DEG_GSE261716_CBD20_28d
SEPTIN8	9	9	DEG_GSE131565; DEG_GSE151512_6h; DEG_GSE168797_Mock_CBD; DEG_GSE168797_SARS_CBD; DEG_GSE179661_HepG2; DEG_GSE179661_MHCC97H; DEG_GSE201508_cGAMP; DEG_GSE235310_LPS; DEG_GSE235310_Veh	0	NA
SERP1	9	1	DEG_GSE151512_12h	8	DEG_GSE131565; DEG_GSE168797_Mock_CBD; DEG_GSE168797_SARS_CBD; DEG_GSE179661_HepG2; DEG_GSE179661_MHCC97H; DEG_GSE272113_CBD; DEG_GSE272113_sCBD; DEG_GSE274859_LPS_24h
SERPINF1	9	7	DEG_GSE131565; DEG_GSE151512_24h; DEG_GSE168797_SARS_CBD; DEG_GSE179661_HepG2; DEG_GSE235310_LPS; DEG_GSE235310_Veh; DEG_GSE274859_LPS_24h	2	DEG_GSE179661_MHCC97H; DEG_GSE274435_DMSO_24h
SERTAD2	9	2	DEG_GSE151512_12h; DEG_GSE261716_CBD0.2_2d	7	DEG_GSE131565; DEG_GSE168797_Mock_CBD; DEG_GSE179661_HepG2; DEG_GSE179661_MHCC97H; DEG_GSE270378_CBD0.75_24h; DEG_GSE272113_CBD; DEG_GSE274859_LPS_24h
SERTAD3	9	5	DEG_GSE168797_Mock_CBD; DEG_GSE168797_SARS_CBD; DEG_GSE168797_SARS_CBDV; DEG_GSE261716_CBD20_28d; DEG_GSE274859_LPS_24h	4	DEG_GSE131565; DEG_GSE179661_HepG2; DEG_GSE179661_MHCC97H; DEG_GSE261716_CBD0.2_2d
SETD2	9	5	DEG_GSE168797_Mock_CBD; DEG_GSE168797_SARS_CBD; DEG_GSE261716_CBD0.2_2d; DEG_GSE261716_CBD20_2d; DEG_GSE274859_LPS_24h	4	DEG_GSE131565; DEG_GSE179661_HepG2; DEG_GSE179661_MHCC97H; DEG_GSE235310_LPS
SFPQ	9	9	DEG_GSE131565; DEG_GSE151512_12h; DEG_GSE151512_24h; DEG_GSE151512_3h; DEG_GSE151512_6h; DEG_GSE168797_Mock_CBD; DEG_GSE168797_SARS_CBD; DEG_GSE201508_enthanol; DEG_GSE274859_LPS_24h	0	NA
SH3BP1	9	5	DEG_GSE168797_SARS_CBD; DEG_GSE179661_MHCC97H; DEG_GSE201508_cGAMP; DEG_GSE201508_enthanol; DEG_GSE274859_LPS_24h	4	DEG_GSE152088; DEG_GSE235310_LPS; DEG_GSE272113_CBD; DEG_GSE272113_sCBD
SH3D19	9	5	DEG_GSE131565; DEG_GSE261716_CBD10_28d; DEG_GSE261716_CBD20_28d; DEG_GSE272113_CBD; DEG_GSE272113_sCBD	4	DEG_GSE168797_Mock_CBD; DEG_GSE168797_SARS_CBD; DEG_GSE179661_MHCC97H; DEG_GSE201508_enthanol
SH3PXD2A	9	6	DEG_GSE179661_MHCC97H; DEG_GSE261716_CBD0.2_28d; DEG_GSE261716_CBD20_28d; DEG_GSE261716_CBD20_2d; DEG_GSE272113_sCBD; DEG_GSE274859_LPS_24h	3	DEG_GSE168797_Mock_CBD; DEG_GSE168797_SARS_CBDV; DEG_GSE235310_Veh
SH3RF1	9	2	DEG_GSE272113_CBD; DEG_GSE272113_sCBD	7	DEG_GSE131565; DEG_GSE151512_24h; DEG_GSE168797_Mock_CBD; DEG_GSE168797_SARS_CBD; DEG_GSE179661_HepG2; DEG_GSE179661_MHCC97H; DEG_GSE235310_Veh
SHB	9	3	DEG_GSE168797_SARS_CBD; DEG_GSE272113_CBD; DEG_GSE272113_sCBD	6	DEG_GSE131565; DEG_GSE151512_12h; DEG_GSE151512_24h; DEG_GSE179661_HepG2; DEG_GSE235310_LPS; DEG_GSE235310_Veh
SHFL	9	5	DEG_GSE131565; DEG_GSE179661_HepG2; DEG_GSE201508_cGAMP; DEG_GSE261716_CBD0.2_28d; DEG_GSE261716_CBD20_28d	4	DEG_GSE168797_SARS_CBD; DEG_GSE235310_Veh; DEG_GSE272113_CBD; DEG_GSE272113_sCBD
SHISA4	9	4	DEG_GSE235310_Veh; DEG_GSE266113_WT; DEG_GSE272113_CBD; DEG_GSE272113_sCBD	5	DEG_GSE131565; DEG_GSE168797_Mock_CBD; DEG_GSE168797_SARS_CBD; DEG_GSE168797_SARS_CBDV; DEG_GSE179661_HepG2
SHMT2	9	0	NA	9	DEG_GSE131565; DEG_GSE151512_12h; DEG_GSE168797_Mock_CBD; DEG_GSE179661_HepG2; DEG_GSE179661_MHCC97H; DEG_GSE235310_LPS; DEG_GSE235310_Veh; DEG_GSE272113_CBD; DEG_GSE272113_sCBD
SIAH1	9	2	DEG_GSE235310_LPS; DEG_GSE272113_CBD	7	DEG_GSE131565; DEG_GSE168797_Mock_CBD; DEG_GSE179661_HepG2; DEG_GSE179661_MHCC97H; DEG_GSE274859_LPS_24h; GSE70689_CBD_NoLPS; GSE70689_CBD_wLPS
SIGMAR1	9	5	DEG_GSE131565; DEG_GSE168797_Mock_CBD; DEG_GSE179661_MHCC97H; DEG_GSE201508_cGAMP; DEG_GSE274859_LPS_24h	4	DEG_GSE151512_12h; DEG_GSE151512_24h; DEG_GSE272113_CBD; DEG_GSE272113_sCBD
SIN3A	9	6	DEG_GSE151512_12h; DEG_GSE151512_24h; DEG_GSE168797_Mock_CBD; DEG_GSE168797_SARS_CBD; DEG_GSE235310_LPS; DEG_GSE274859_LPS_24h	3	DEG_GSE179661_MHCC97H; DEG_GSE272113_CBD; DEG_GSE272113_sCBD
SLAMF7	9	0	NA	9	DEG_GSE131565; DEG_GSE168797_Mock_CBD; DEG_GSE168797_SARS_CBD; DEG_GSE179661_MHCC97H; DEG_GSE201508_cGAMP; DEG_GSE201508_enthanol; DEG_GSE235310_LPS; DEG_GSE235310_Veh; DEG_GSE274859_LPS_24h
SLC11A2	9	1	DEG_GSE179661_HepG2	8	DEG_GSE131565; DEG_GSE168797_SARS_CBD; DEG_GSE201508_cGAMP; DEG_GSE235310_LPS; DEG_GSE272113_CBD; DEG_GSE272113_sCBD; DEG_GSE274859_LPS_24h; GSE70689_CBD_wLPS
SLC16A1	9	6	DEG_GSE151512_24h; DEG_GSE152088; DEG_GSE179661_HepG2; DEG_GSE235310_Veh; DEG_GSE261716_CBD10_28d; DEG_GSE261716_CBD20_28d	3	DEG_GSE168797_SARS_CBD; DEG_GSE272113_CBD; DEG_GSE272113_sCBD
SLC19A1	9	5	DEG_GSE131565; DEG_GSE168797_Mock_CBD; DEG_GSE179661_MHCC97H; DEG_GSE201508_cGAMP; DEG_GSE274859_LPS_24h	4	DEG_GSE235310_LPS; DEG_GSE266113_WT; DEG_GSE272113_CBD; DEG_GSE272113_sCBD
SLC20A2	9	3	DEG_GSE168797_SARS_CBD; DEG_GSE168797_SARS_CBDV; DEG_GSE179661_MHCC97H	6	DEG_GSE131565; DEG_GSE151512_12h; DEG_GSE151512_24h; DEG_GSE235310_LPS; DEG_GSE272113_CBD; DEG_GSE272113_sCBD
SLC25A1	9	7	DEG_GSE131565; DEG_GSE168797_Mock_CBD; DEG_GSE179661_MHCC97H; DEG_GSE235310_LPS; DEG_GSE235310_Veh; DEG_GSE274435_DMSO_24h; DEG_GSE274859_LPS_24h	2	DEG_GSE151512_12h; DEG_GSE151512_24h
SLC25A10	9	9	DEG_GSE131565; DEG_GSE151512_24h; DEG_GSE168797_Mock_CBD; DEG_GSE168797_SARS_CBD; DEG_GSE179661_MHCC97H; DEG_GSE201508_cGAMP; DEG_GSE235310_Veh; DEG_GSE274859_LPS_24h; GSE70689_CBD_wLPS	0	NA
SLC25A23	9	8	DEG_GSE151512_24h; DEG_GSE151512_6h; DEG_GSE168797_Mock_CBD; DEG_GSE168797_SARS_CBD; DEG_GSE179661_HepG2; DEG_GSE235310_LPS; DEG_GSE235310_Veh; DEG_GSE266113_WT	1	DEG_GSE131565
SLC25A25	9	5	DEG_GSE168797_SARS_CBDV; DEG_GSE261716_CBD10_28d; DEG_GSE261716_CBD20_28d; DEG_GSE261716_CBD20_2d; DEG_GSE274859_LPS_24h	4	DEG_GSE168797_Mock_CBD; DEG_GSE179661_HepG2; DEG_GSE179661_MHCC97H; DEG_GSE235310_LPS
SLC25A37	9	1	DEG_GSE131565	8	DEG_GSE151512_12h; DEG_GSE151512_24h; DEG_GSE201508_cGAMP; DEG_GSE235310_LPS; DEG_GSE235310_Veh; DEG_GSE272113_CBD; DEG_GSE272113_sCBD; DEG_GSE274859_LPS_24h
SLC25A40	9	2	DEG_GSE168797_Mock_CBD; DEG_GSE179661_HepG2	7	DEG_GSE151512_12h; DEG_GSE151512_24h; DEG_GSE151512_6h; DEG_GSE201508_cGAMP; DEG_GSE235310_LPS; DEG_GSE235310_Veh; DEG_GSE261716_CBD20_28d
SLC27A1	9	1	DEG_GSE131565	8	DEG_GSE152088; DEG_GSE168797_Mock_CBD; DEG_GSE168797_SARS_CBD; DEG_GSE235310_LPS; DEG_GSE261716_CBD0.2_28d; DEG_GSE272113_CBD; DEG_GSE272113_sCBD; DEG_GSE274859_LPS_24h
SLC29A1	9	6	DEG_GSE131565; DEG_GSE168797_Mock_CBD; DEG_GSE168797_SARS_CBD; DEG_GSE179661_HepG2; DEG_GSE179661_MHCC97H; DEG_GSE274859_LPS_24h	3	DEG_GSE151512_24h; DEG_GSE235310_LPS; DEG_GSE235310_Veh
SLC29A2	9	4	DEG_GSE179661_MHCC97H; DEG_GSE235310_LPS; DEG_GSE274859_LPS_24h; GSE70689_CBD_NoLPS	5	DEG_GSE151512_12h; DEG_GSE151512_24h; DEG_GSE151512_6h; DEG_GSE272113_CBD; DEG_GSE272113_sCBD
SLC29A3	9	2	DEG_GSE168797_Mock_CBDV; DEG_GSE179661_MHCC97H	7	DEG_GSE131565; DEG_GSE168797_SARS_CBDV; DEG_GSE235310_LPS; DEG_GSE235310_Veh; DEG_GSE272113_CBD; DEG_GSE272113_sCBD; DEG_GSE274859_LPS_24h
SLC33A1	9	0	NA	9	DEG_GSE131565; DEG_GSE151512_6h; DEG_GSE168797_Mock_CBD; DEG_GSE168797_SARS_CBD; DEG_GSE179661_MHCC97H; DEG_GSE201508_cGAMP; DEG_GSE201508_enthanol; DEG_GSE272113_CBD; DEG_GSE274859_LPS_24h
SLC35C2	9	2	DEG_GSE261716_CBD20_28d; DEG_GSE261716_CBD20_2d	7	DEG_GSE131565; DEG_GSE168797_Mock_CBD; DEG_GSE168797_SARS_CBD; DEG_GSE235310_LPS; DEG_GSE272113_CBD; DEG_GSE272113_sCBD; DEG_GSE274859_LPS_24h
SLC39A1	9	4	DEG_GSE131565; DEG_GSE151512_24h; DEG_GSE168797_Mock_CBD; DEG_GSE179661_MHCC97H	5	DEG_GSE168797_SARS_CBDV; DEG_GSE179661_HepG2; DEG_GSE261716_CBD0.2_2d; DEG_GSE272113_CBD; DEG_GSE272113_sCBD
SLC40A1	9	4	DEG_GSE151512_12h; DEG_GSE168797_Mock_CBD; DEG_GSE179661_MHCC97H; DEG_GSE235310_Veh	5	DEG_GSE131565; DEG_GSE168797_Mock_CBDV; DEG_GSE179661_HepG2; DEG_GSE274859_LPS_24h; GSE70689_CBD_NoLPS
SLC45A4	9	3	DEG_GSE168797_Mock_CBD; DEG_GSE168797_SARS_CBD; DEG_GSE168797_SARS_CBDV	6	DEG_GSE131565; DEG_GSE168797_Mock_CBDV; DEG_GSE179661_MHCC97H; DEG_GSE235310_LPS; DEG_GSE272113_CBD; DEG_GSE274859_LPS_24h
SLC50A1	9	0	NA	9	DEG_GSE131565; DEG_GSE151512_12h; DEG_GSE151512_24h; DEG_GSE168797_Mock_CBD; DEG_GSE168797_SARS_CBD; DEG_GSE179661_MHCC97H; DEG_GSE232624_EtOH0.25_CBD0.75_12h; DEG_GSE272113_CBD; DEG_GSE272113_sCBD
SLCO3A1	9	5	DEG_GSE261716_CBD10_28d; DEG_GSE261716_CBD20_28d; DEG_GSE272113_sCBD; DEG_GSE274435_DMSO_24h; DEG_GSE274435_EtOH_24h	4	DEG_GSE131565; DEG_GSE168797_Mock_CBD; DEG_GSE168797_SARS_CBD; DEG_GSE168797_SARS_CBDV
SLCO5A1	9	6	DEG_GSE151512_12h; DEG_GSE151512_24h; DEG_GSE151512_6h; DEG_GSE168797_SARS_CBDV; DEG_GSE235310_LPS; DEG_GSE235310_Veh	3	DEG_GSE131565; DEG_GSE168797_Mock_CBD; DEG_GSE179661_HepG2
SMARCD2	9	7	DEG_GSE131565; DEG_GSE151512_24h; DEG_GSE151512_6h; DEG_GSE168797_Mock_CBD; DEG_GSE179661_HepG2; DEG_GSE235310_Veh; DEG_GSE261716_CBD20_28d	2	DEG_GSE152088; DEG_GSE261716_CBD0.2_2d
SMIM4	9	4	DEG_GSE131565; DEG_GSE272113_CBD; DEG_GSE272113_sCBD; DEG_GSE274859_LPS_24h	5	DEG_GSE168797_Mock_CBD; DEG_GSE168797_SARS_CBD; DEG_GSE235310_LPS; DEG_GSE261716_CBD0.2_2d; DEG_GSE261716_CBD20_2d
SND1	9	2	DEG_GSE261716_CBD20_28d; DEG_GSE261716_CBD20_2d	7	DEG_GSE131565; DEG_GSE168797_Mock_CBD; DEG_GSE168797_SARS_CBD; DEG_GSE179661_HepG2; DEG_GSE179661_MHCC97H; DEG_GSE201508_cGAMP; DEG_GSE274859_LPS_24h
SNX14	9	5	DEG_GSE179661_HepG2; DEG_GSE232624_Veh_CBD3_12h; DEG_GSE235310_LPS; DEG_GSE261716_CBD0.2_2d; DEG_GSE274859_LPS_24h	4	DEG_GSE131565; DEG_GSE151512_12h; DEG_GSE151512_24h; DEG_GSE151512_6h
SNX25	9	3	DEG_GSE261716_CBD0.2_2d; DEG_GSE261716_CBD20_2d; DEG_GSE274859_LPS_24h	6	DEG_GSE131565; DEG_GSE151512_12h; DEG_GSE151512_24h; DEG_GSE235310_LPS; DEG_GSE272113_CBD; DEG_GSE272113_sCBD
SOGA1	9	6	DEG_GSE151512_24h; DEG_GSE151512_3h; DEG_GSE151512_6h; DEG_GSE168797_Mock_CBD; DEG_GSE168797_SARS_CBD; DEG_GSE274859_LPS_24h	3	DEG_GSE131565; DEG_GSE179661_HepG2; DEG_GSE235310_LPS
SP110	9	4	DEG_GSE131565; DEG_GSE152088; DEG_GSE179661_HepG2; DEG_GSE201508_cGAMP	5	DEG_GSE168797_Mock_CBD; DEG_GSE168797_SARS_CBD; DEG_GSE235310_LPS; DEG_GSE235310_Veh; DEG_GSE274859_LPS_24h
SPAG5	9	9	DEG_GSE131565; DEG_GSE151512_12h; DEG_GSE151512_24h; DEG_GSE168797_Mock_CBD; DEG_GSE168797_SARS_CBD; DEG_GSE179661_HepG2; DEG_GSE179661_MHCC97H; DEG_GSE235310_Veh; DEG_GSE274859_LPS_24h	0	NA
SPIRE1	9	0	NA	9	DEG_GSE131565; DEG_GSE151512_24h; DEG_GSE168797_Mock_CBD; DEG_GSE168797_SARS_CBD; DEG_GSE179661_MHCC97H; DEG_GSE201508_cGAMP; DEG_GSE235310_LPS; DEG_GSE235310_Veh; DEG_GSE274859_LPS_24h
SPNS1	9	2	DEG_GSE168797_Mock_CBDV; DEG_GSE261716_CBD20_28d	7	DEG_GSE168797_Mock_CBD; DEG_GSE168797_SARS_CBD; DEG_GSE179661_HepG2; DEG_GSE235310_LPS; DEG_GSE235310_Veh; DEG_GSE272113_sCBD; DEG_GSE274859_LPS_24h
SPTAN1	9	7	DEG_GSE131565; DEG_GSE168797_Mock_CBD; DEG_GSE168797_Mock_CBDV; DEG_GSE168797_SARS_CBD; DEG_GSE235310_Veh; DEG_GSE272113_CBD; DEG_GSE272113_sCBD	2	DEG_GSE168797_SARS_CBDV; DEG_GSE179661_MHCC97H
SPTBN1	9	5	DEG_GSE131565; DEG_GSE151512_24h; DEG_GSE168797_Mock_CBDV; DEG_GSE272113_sCBD; DEG_GSE274859_LPS_24h	4	DEG_GSE179661_MHCC97H; DEG_GSE201508_cGAMP; DEG_GSE232624_EtOH0.25_CBD0.75_12h; DEG_GSE235310_Veh
SPTLC2	9	0	NA	9	DEG_GSE131565; DEG_GSE168797_SARS_CBD; DEG_GSE168797_SARS_CBDV; DEG_GSE179661_HepG2; DEG_GSE179661_MHCC97H; DEG_GSE235310_LPS; DEG_GSE235310_Veh; DEG_GSE272113_sCBD; DEG_GSE274859_LPS_24h
SQOR	9	1	DEG_GSE261716_CBD0.2_28d	8	DEG_GSE168797_Mock_CBD; DEG_GSE168797_SARS_CBD; DEG_GSE168797_SARS_CBDV; DEG_GSE179661_MHCC97H; DEG_GSE235310_LPS; DEG_GSE272113_CBD; DEG_GSE272113_sCBD; DEG_GSE274859_LPS_24h
SRM	9	4	DEG_GSE131565; DEG_GSE201508_cGAMP; DEG_GSE232624_EtOH0.75_CBD0.75_12h; DEG_GSE274859_LPS_24h	5	DEG_GSE232624_EtOH0.75_CBD0.75_6h; DEG_GSE235310_LPS; DEG_GSE266113_WT; DEG_GSE272113_CBD; DEG_GSE272113_sCBD
SRPRB	9	0	NA	9	DEG_GSE131565; DEG_GSE168797_Mock_CBD; DEG_GSE168797_SARS_CBD; DEG_GSE179661_HepG2; DEG_GSE179661_MHCC97H; DEG_GSE235310_LPS; DEG_GSE272113_CBD; DEG_GSE272113_sCBD; DEG_GSE274859_LPS_24h
SRSF6	9	9	DEG_GSE131565; DEG_GSE151512_12h; DEG_GSE151512_24h; DEG_GSE151512_6h; DEG_GSE168797_Mock_CBD; DEG_GSE168797_SARS_CBD; DEG_GSE179661_HepG2; DEG_GSE179661_MHCC97H; DEG_GSE235310_LPS	0	NA
SSBP4	9	4	DEG_GSE131565; DEG_GSE168797_Mock_CBD; DEG_GSE179661_MHCC97H; DEG_GSE274859_LPS_24h	5	DEG_GSE151512_24h; DEG_GSE179661_HepG2; DEG_GSE235310_LPS; DEG_GSE272113_CBD; DEG_GSE272113_sCBD
SSR1	9	0	NA	9	DEG_GSE131565; DEG_GSE168797_Mock_CBD; DEG_GSE168797_SARS_CBD; DEG_GSE179661_MHCC97H; DEG_GSE201508_cGAMP; DEG_GSE235310_LPS; DEG_GSE272113_CBD; DEG_GSE272113_sCBD; DEG_GSE274859_LPS_24h
SSR4	9	0	NA	9	DEG_GSE131565; DEG_GSE168797_Mock_CBD; DEG_GSE168797_SARS_CBD; DEG_GSE168797_SARS_CBDV; DEG_GSE179661_HepG2; DEG_GSE179661_MHCC97H; DEG_GSE235310_LPS; DEG_GSE261716_CBD20_2d; DEG_GSE274859_LPS_24h
ST3GAL4	9	5	DEG_GSE131565; DEG_GSE168797_SARS_CBD; DEG_GSE179661_MHCC97H; DEG_GSE201508_cGAMP; DEG_GSE274859_LPS_24h	4	DEG_GSE151512_24h; DEG_GSE235310_LPS; DEG_GSE272113_CBD; DEG_GSE272113_sCBD
STBD1	9	0	NA	9	DEG_GSE131565; DEG_GSE168797_Mock_CBD; DEG_GSE168797_SARS_CBD; DEG_GSE179661_HepG2; DEG_GSE179661_MHCC97H; DEG_GSE261716_CBD10_28d; DEG_GSE261716_CBD10_2d; DEG_GSE261716_CBD20_28d; DEG_GSE261716_CBD20_2d
STIP1	9	3	DEG_GSE131565; DEG_GSE151512_24h; DEG_GSE274859_LPS_24h	6	DEG_GSE151512_6h; DEG_GSE168797_SARS_CBD; DEG_GSE179661_MHCC97H; DEG_GSE201508_cGAMP; DEG_GSE235310_LPS; DEG_GSE272113_sCBD
STMN3	9	8	DEG_GSE131565; DEG_GSE151512_12h; DEG_GSE151512_24h; DEG_GSE168797_Mock_CBD; DEG_GSE168797_SARS_CBD; DEG_GSE168797_SARS_CBDV; DEG_GSE179661_HepG2; DEG_GSE235310_Veh	1	DEG_GSE168797_Mock_CBDV
STN1	9	3	DEG_GSE179661_HepG2; DEG_GSE235310_LPS; DEG_GSE235310_Veh	6	DEG_GSE131565; DEG_GSE151512_24h; DEG_GSE168797_Mock_CBD; DEG_GSE168797_SARS_CBD; DEG_GSE168797_SARS_CBDV; DEG_GSE179661_MHCC97H
STT3A	9	0	NA	9	DEG_GSE131565; DEG_GSE168797_Mock_CBD; DEG_GSE168797_SARS_CBD; DEG_GSE179661_MHCC97H; DEG_GSE201508_cGAMP; DEG_GSE235310_LPS; DEG_GSE272113_CBD; DEG_GSE272113_sCBD; DEG_GSE274859_LPS_24h
SUCLG1	9	3	DEG_GSE131565; DEG_GSE179661_MHCC97H; DEG_GSE272113_CBD	6	DEG_GSE151512_24h; DEG_GSE168797_SARS_CBDV; DEG_GSE261716_CBD0.2_28d; DEG_GSE261716_CBD0.2_2d; DEG_GSE261716_CBD20_28d; DEG_GSE261716_CBD20_2d
SUCLG2	9	5	DEG_GSE131565; DEG_GSE168797_Mock_CBD; DEG_GSE168797_SARS_CBD; DEG_GSE179661_HepG2; DEG_GSE235310_LPS	4	DEG_GSE151512_24h; DEG_GSE168797_Mock_CBDV; DEG_GSE272113_CBD; DEG_GSE272113_sCBD
SUCO	9	3	DEG_GSE152088; DEG_GSE232624_Veh_CBD3_12h; DEG_GSE235310_LPS	6	DEG_GSE131565; DEG_GSE168797_Mock_CBD; DEG_GSE179661_HepG2; DEG_GSE179661_MHCC97H; DEG_GSE201508_cGAMP; DEG_GSE274859_LPS_24h
SULF2	9	8	DEG_GSE131565; DEG_GSE151512_12h; DEG_GSE151512_24h; DEG_GSE168797_Mock_CBD; DEG_GSE179661_HepG2; DEG_GSE272113_CBD; DEG_GSE272113_sCBD; DEG_GSE274859_LPS_24h	1	DEG_GSE152088
SUN2	9	4	DEG_GSE151512_6h; DEG_GSE168797_Mock_CBD; DEG_GSE179661_MHCC97H; DEG_GSE261716_CBD20_28d	5	DEG_GSE152088; DEG_GSE235310_LPS; DEG_GSE235310_Veh; DEG_GSE274435_DMSO_24h; DEG_GSE274435_EtOH_24h
SUPT16H	9	9	DEG_GSE131565; DEG_GSE151512_12h; DEG_GSE151512_24h; DEG_GSE168797_Mock_CBD; DEG_GSE168797_SARS_CBD; DEG_GSE179661_HepG2; DEG_GSE235310_LPS; DEG_GSE261716_CBD10_28d; DEG_GSE274859_LPS_24h	0	NA
SUSD2	9	8	DEG_GSE131565; DEG_GSE151512_24h; DEG_GSE168797_Mock_CBD; DEG_GSE168797_SARS_CBD; DEG_GSE168797_SARS_CBDV; DEG_GSE179661_MHCC97H; DEG_GSE235310_LPS; DEG_GSE235310_Veh	1	DEG_GSE168797_Mock_CBDV
SYNE3	9	2	DEG_GSE261716_CBD20_28d; DEG_GSE274859_LPS_24h	7	DEG_GSE131565; DEG_GSE151512_12h; DEG_GSE151512_24h; DEG_GSE151512_6h; DEG_GSE179661_HepG2; DEG_GSE179661_MHCC97H; DEG_GSE272113_CBD
SYT17	9	2	DEG_GSE274435_DMSO_24h; DEG_GSE274435_EtOH_24h	7	DEG_GSE131565; DEG_GSE168797_Mock_CBD; DEG_GSE168797_SARS_CBD; DEG_GSE179661_MHCC97H; DEG_GSE235310_LPS; DEG_GSE235310_Veh; DEG_GSE272113_sCBD
SYTL2	9	6	DEG_GSE131565; DEG_GSE168797_SARS_CBD; DEG_GSE179661_MHCC97H; DEG_GSE235310_LPS; DEG_GSE272113_CBD; DEG_GSE272113_sCBD	3	DEG_GSE151512_12h; DEG_GSE151512_24h; DEG_GSE151512_6h
TACC3	9	9	DEG_GSE131565; DEG_GSE151512_12h; DEG_GSE151512_24h; DEG_GSE151512_6h; DEG_GSE168797_Mock_CBD; DEG_GSE168797_SARS_CBD; DEG_GSE179661_HepG2; DEG_GSE235310_Veh; DEG_GSE274859_LPS_24h	0	NA
TAX1BP1	9	0	NA	9	DEG_GSE131565; DEG_GSE151512_24h; DEG_GSE151512_6h; DEG_GSE168797_Mock_CBD; DEG_GSE168797_Mock_CBDV; DEG_GSE168797_SARS_CBD; DEG_GSE179661_MHCC97H; DEG_GSE201508_cGAMP; DEG_GSE274859_LPS_24h
TBCD	9	9	DEG_GSE131565; DEG_GSE151512_12h; DEG_GSE151512_24h; DEG_GSE151512_6h; DEG_GSE168797_Mock_CBD; DEG_GSE168797_SARS_CBD; DEG_GSE179661_HepG2; DEG_GSE179661_MHCC97H; DEG_GSE232624_EtOH0.75_CBD0.75_12h	0	NA
TCAF1	9	9	DEG_GSE131565; DEG_GSE151512_24h; DEG_GSE168797_Mock_CBD; DEG_GSE168797_SARS_CBD; DEG_GSE179661_HepG2; DEG_GSE179661_MHCC97H; DEG_GSE235310_Veh; DEG_GSE272113_CBD; DEG_GSE272113_sCBD	0	NA
TCP11L2	9	1	DEG_GSE168797_Mock_CBDV	8	DEG_GSE131565; DEG_GSE168797_Mock_CBD; DEG_GSE168797_SARS_CBD; DEG_GSE179661_HepG2; DEG_GSE179661_MHCC97H; DEG_GSE235310_LPS; DEG_GSE235310_Veh; DEG_GSE274435_DMSO_24h
TEAD4	9	7	DEG_GSE131565; DEG_GSE168797_Mock_CBD; DEG_GSE168797_SARS_CBD; DEG_GSE201508_cGAMP; DEG_GSE235310_Veh; DEG_GSE272113_CBD; DEG_GSE272113_sCBD	2	DEG_GSE151512_24h; DEG_GSE179661_HepG2
TEF	9	4	DEG_GSE168797_Mock_CBD; DEG_GSE168797_SARS_CBD; DEG_GSE168797_SARS_CBDV; DEG_GSE272113_sCBD	5	DEG_GSE131565; DEG_GSE151512_12h; DEG_GSE261716_CBD0.2_28d; DEG_GSE261716_CBD10_28d; DEG_GSE261716_CBD20_28d
TENT5A	9	4	DEG_GSE168797_Mock_CBD; DEG_GSE168797_SARS_CBDV; DEG_GSE201508_cGAMP; DEG_GSE201508_enthanol	5	DEG_GSE168797_Mock_CBDV; DEG_GSE179661_HepG2; DEG_GSE179661_MHCC97H; DEG_GSE235310_LPS; DEG_GSE274859_LPS_24h
TET3	9	6	DEG_GSE151512_24h; DEG_GSE168797_Mock_CBD; DEG_GSE168797_SARS_CBD; DEG_GSE168797_SARS_CBDV; DEG_GSE261716_CBD0.2_2d; DEG_GSE274859_LPS_24h	3	DEG_GSE131565; DEG_GSE179661_HepG2; DEG_GSE272113_CBD
TEX261	9	6	DEG_GSE151512_12h; DEG_GSE151512_24h; DEG_GSE168797_Mock_CBD; DEG_GSE168797_SARS_CBD; DEG_GSE179661_HepG2; DEG_GSE179661_MHCC97H	3	DEG_GSE235310_LPS; DEG_GSE272113_CBD; DEG_GSE272113_sCBD
TGFB2	9	7	DEG_GSE131565; DEG_GSE151512_12h; DEG_GSE151512_6h; DEG_GSE168797_Mock_CBD; DEG_GSE168797_SARS_CBD; DEG_GSE272113_CBD; DEG_GSE272113_sCBD	2	DEG_GSE179661_MHCC97H; DEG_GSE201508_cGAMP
TGFBR2	9	7	DEG_GSE131565; DEG_GSE168797_Mock_CBD; DEG_GSE168797_SARS_CBD; DEG_GSE179661_MHCC97H; DEG_GSE261716_CBD0.2_2d; DEG_GSE272113_sCBD; DEG_GSE274859_LPS_24h	2	DEG_GSE235310_LPS; DEG_GSE261716_CBD20_28d
TGOLN2	9	7	DEG_GSE131565; DEG_GSE151512_24h; DEG_GSE168797_Mock_CBD; DEG_GSE168797_SARS_CBD; DEG_GSE179661_HepG2; DEG_GSE179661_MHCC97H; DEG_GSE261716_CBD20_28d	2	DEG_GSE235310_LPS; DEG_GSE274859_LPS_24h
THBD	9	4	DEG_GSE168797_SARS_CBDV; DEG_GSE179661_MHCC97H; DEG_GSE201508_cGAMP; DEG_GSE201508_enthanol	5	DEG_GSE131565; DEG_GSE235310_LPS; DEG_GSE261716_CBD20_28d; DEG_GSE272113_CBD; DEG_GSE272113_sCBD
THOP1	9	8	DEG_GSE131565; DEG_GSE151512_24h; DEG_GSE151512_6h; DEG_GSE168797_Mock_CBD; DEG_GSE168797_SARS_CBD; DEG_GSE179661_MHCC97H; DEG_GSE201508_cGAMP; DEG_GSE274859_LPS_24h	1	DEG_GSE179661_HepG2
THRA	9	7	DEG_GSE131565; DEG_GSE151512_24h; DEG_GSE168797_Mock_CBD; DEG_GSE168797_SARS_CBD; DEG_GSE179661_MHCC97H; DEG_GSE272113_CBD; DEG_GSE274859_LPS_24h	2	DEG_GSE235310_LPS; DEG_GSE235310_Veh
TICRR	9	8	DEG_GSE131565; DEG_GSE151512_24h; DEG_GSE151512_3h; DEG_GSE168797_Mock_CBD; DEG_GSE168797_SARS_CBD; DEG_GSE179661_HepG2; DEG_GSE179661_MHCC97H; DEG_GSE274859_LPS_24h	1	DEG_GSE201508_cGAMP
TIRAP	9	3	DEG_GSE151512_24h; DEG_GSE274859_LPS_24h; GSE70689_CBD_wLPS	6	DEG_GSE131565; DEG_GSE168797_Mock_CBD; DEG_GSE168797_SARS_CBD; DEG_GSE235310_LPS; DEG_GSE272113_CBD; DEG_GSE272113_sCBD
TLR4	9	1	DEG_GSE179661_MHCC97H	8	DEG_GSE168797_Mock_CBD; DEG_GSE168797_SARS_CBD; DEG_GSE201508_cGAMP; DEG_GSE235310_LPS; DEG_GSE235310_Veh; DEG_GSE272113_CBD; DEG_GSE272113_sCBD; DEG_GSE274859_LPS_24h
TM4SF19	9	1	DEG_GSE179661_MHCC97H	8	DEG_GSE131565; DEG_GSE168797_Mock_CBD; DEG_GSE168797_SARS_CBD; DEG_GSE168797_SARS_CBDV; DEG_GSE179661_HepG2; DEG_GSE201508_cGAMP; DEG_GSE235310_LPS; DEG_GSE235310_Veh
TMBIM1	9	2	DEG_GSE272113_CBD; DEG_GSE272113_sCBD	7	DEG_GSE131565; DEG_GSE168797_Mock_CBD; DEG_GSE168797_SARS_CBD; DEG_GSE179661_MHCC97H; DEG_GSE235310_LPS; DEG_GSE235310_Veh; DEG_GSE261716_CBD10_28d
TMED5	9	1	DEG_GSE152088	8	DEG_GSE131565; DEG_GSE168797_Mock_CBD; DEG_GSE168797_SARS_CBD; DEG_GSE179661_MHCC97H; DEG_GSE201508_cGAMP; DEG_GSE235310_LPS; DEG_GSE261716_CBD0.2_28d; DEG_GSE261716_CBD20_28d
TMED9	9	3	DEG_GSE151512_12h; DEG_GSE151512_24h; DEG_GSE201508_cGAMP	6	DEG_GSE131565; DEG_GSE168797_Mock_CBD; DEG_GSE168797_SARS_CBD; DEG_GSE168797_SARS_CBDV; DEG_GSE179661_HepG2; DEG_GSE179661_MHCC97H
TMEM106B	9	2	DEG_GSE168797_Mock_CBD; DEG_GSE168797_SARS_CBD	7	DEG_GSE131565; DEG_GSE151512_12h; DEG_GSE151512_24h; DEG_GSE179661_MHCC97H; DEG_GSE235310_LPS; DEG_GSE261716_CBD20_28d; DEG_GSE274859_LPS_24h
TMEM120B	9	6	DEG_GSE168797_Mock_CBDV; DEG_GSE232624_Veh_CBD0.75_12h; DEG_GSE235310_LPS; DEG_GSE235310_Veh; DEG_GSE272113_CBD; DEG_GSE272113_sCBD	3	DEG_GSE151512_12h; DEG_GSE151512_24h; DEG_GSE179661_HepG2
TMEM144	9	2	DEG_GSE179661_HepG2; DEG_GSE179661_MHCC97H	7	DEG_GSE168797_Mock_CBD; DEG_GSE168797_SARS_CBD; DEG_GSE201508_cGAMP; DEG_GSE201508_enthanol; DEG_GSE235310_LPS; DEG_GSE235310_Veh; DEG_GSE274859_LPS_24h
TMEM150A	9	4	DEG_GSE131565; DEG_GSE168797_Mock_CBDV; DEG_GSE261716_CBD0.2_28d; DEG_GSE261716_CBD20_28d	5	DEG_GSE168797_Mock_CBD; DEG_GSE168797_SARS_CBD; DEG_GSE235310_LPS; DEG_GSE272113_CBD; DEG_GSE272113_sCBD
TMEM250	9	6	DEG_GSE151512_12h; DEG_GSE151512_24h; DEG_GSE179661_MHCC97H; DEG_GSE232624_EtOH0.75_CBD0.75_12h; DEG_GSE261716_CBD20_28d; DEG_GSE261716_CBD20_2d	3	DEG_GSE152088; DEG_GSE168797_Mock_CBD; DEG_GSE168797_SARS_CBD
TMEM251	9	1	DEG_GSE168797_SARS_CBDV	8	DEG_GSE168797_Mock_CBD; DEG_GSE201508_cGAMP; DEG_GSE201508_enthanol; DEG_GSE235310_LPS; DEG_GSE235310_Veh; DEG_GSE272113_CBD; DEG_GSE272113_sCBD; DEG_GSE274859_LPS_24h
TMEM258	9	1	DEG_GSE151512_24h	8	DEG_GSE131565; DEG_GSE152088; DEG_GSE168797_Mock_CBD; DEG_GSE168797_SARS_CBD; DEG_GSE179661_HepG2; DEG_GSE179661_MHCC97H; DEG_GSE261716_CBD20_2d; DEG_GSE272113_sCBD
TMEM268	9	0	NA	9	DEG_GSE168797_Mock_CBD; DEG_GSE168797_SARS_CBD; DEG_GSE179661_HepG2; DEG_GSE179661_MHCC97H; DEG_GSE235310_Veh; DEG_GSE261716_CBD20_28d; DEG_GSE272113_CBD; DEG_GSE272113_sCBD; DEG_GSE274859_LPS_24h
TMEM35B	9	2	DEG_GSE131565; DEG_GSE179661_HepG2	7	DEG_GSE151512_24h; DEG_GSE151512_6h; DEG_GSE168797_Mock_CBD; DEG_GSE168797_SARS_CBD; DEG_GSE168797_SARS_CBDV; DEG_GSE235310_Veh; DEG_GSE274859_LPS_24h
TMEM63A	9	5	DEG_GSE179661_MHCC97H; DEG_GSE261716_CBD0.2_28d; DEG_GSE261716_CBD20_28d; DEG_GSE261716_CBD20_2d; DEG_GSE274859_LPS_24h	4	DEG_GSE131565; DEG_GSE235310_LPS; DEG_GSE235310_Veh; DEG_GSE272113_CBD
TMEM64	9	7	DEG_GSE131565; DEG_GSE168797_Mock_CBD; DEG_GSE179661_HepG2; DEG_GSE179661_MHCC97H; DEG_GSE272113_CBD; DEG_GSE272113_sCBD; DEG_GSE274859_LPS_24h	2	DEG_GSE235310_LPS; DEG_GSE235310_Veh
TMUB2	9	4	DEG_GSE151512_24h; DEG_GSE151512_6h; DEG_GSE232624_Veh_CBD0.75_12h; DEG_GSE232624_Veh_CBD3_12h	5	DEG_GSE131565; DEG_GSE168797_Mock_CBD; DEG_GSE168797_SARS_CBD; DEG_GSE179661_MHCC97H; DEG_GSE232624_EtOH0.25_CBD0.75_12h
TNS2	9	4	DEG_GSE131565; DEG_GSE168797_Mock_CBD; DEG_GSE168797_SARS_CBD; DEG_GSE179661_MHCC97H	5	DEG_GSE168797_Mock_CBDV; DEG_GSE235310_LPS; DEG_GSE274859_LPS_24h; DEG_GSE275998_CDB10; DEG_GSE275998_CDB20
TOE1	9	8	DEG_GSE131565; DEG_GSE151512_12h; DEG_GSE151512_24h; DEG_GSE168797_Mock_CBD; DEG_GSE168797_SARS_CBD; DEG_GSE201508_cGAMP; DEG_GSE201508_enthanol; DEG_GSE235310_LPS	1	DEG_GSE261716_CBD0.2_28d
TOMM34	9	7	DEG_GSE151512_12h; DEG_GSE151512_24h; DEG_GSE201508_cGAMP; DEG_GSE235310_LPS; DEG_GSE235310_Veh; DEG_GSE261716_CBD20_28d; DEG_GSE274859_LPS_24h	2	DEG_GSE168797_SARS_CBD; DEG_GSE179661_HepG2
TOP2A	9	9	DEG_GSE131565; DEG_GSE151512_12h; DEG_GSE168797_Mock_CBD; DEG_GSE168797_SARS_CBD; DEG_GSE179661_HepG2; DEG_GSE179661_MHCC97H; DEG_GSE232624_EtOH0.25_CBD0.75_6h; DEG_GSE232624_EtOH0.75_CBD0.75_6h; DEG_GSE274859_LPS_24h	0	NA
TPM1	9	8	DEG_GSE131565; DEG_GSE168797_Mock_CBD; DEG_GSE168797_SARS_CBD; DEG_GSE179661_HepG2; DEG_GSE179661_MHCC97H; DEG_GSE235310_Veh; DEG_GSE272113_CBD; DEG_GSE272113_sCBD	1	DEG_GSE274859_LPS_24h
TPM2	9	7	DEG_GSE131565; DEG_GSE168797_Mock_CBD; DEG_GSE168797_SARS_CBD; DEG_GSE179661_MHCC97H; DEG_GSE235310_Veh; DEG_GSE272113_CBD; DEG_GSE272113_sCBD	2	DEG_GSE151512_24h; DEG_GSE261716_CBD0.2_2d
TPT1	9	1	DEG_GSE272113_CBD	8	DEG_GSE131565; DEG_GSE151512_24h; DEG_GSE168797_Mock_CBD; DEG_GSE179661_MHCC97H; DEG_GSE201508_cGAMP; DEG_GSE261716_CBD0.2_2d; DEG_GSE261716_CBD20_2d; DEG_GSE274859_LPS_24h
TRAF4	9	7	DEG_GSE151512_6h; DEG_GSE168797_SARS_CBD; DEG_GSE168797_SARS_CBDV; DEG_GSE201508_enthanol; DEG_GSE272113_CBD; DEG_GSE272113_sCBD; DEG_GSE274859_LPS_24h	2	DEG_GSE179661_HepG2; DEG_GSE235310_LPS
TRIB2	9	6	DEG_GSE131565; DEG_GSE151512_12h; DEG_GSE151512_24h; DEG_GSE151512_6h; DEG_GSE179661_HepG2; DEG_GSE274859_LPS_24h	3	DEG_GSE235310_LPS; DEG_GSE235310_Veh; DEG_GSE272113_CBD
TRIO	9	6	DEG_GSE131565; DEG_GSE151512_24h; DEG_GSE151512_6h; DEG_GSE168797_SARS_CBD; DEG_GSE168797_SARS_CBDV; DEG_GSE261716_CBD10_28d	3	DEG_GSE179661_HepG2; DEG_GSE235310_Veh; DEG_GSE274859_LPS_24h
TRIP10	9	5	DEG_GSE168797_Mock_CBD; DEG_GSE168797_SARS_CBD; DEG_GSE201508_cGAMP; DEG_GSE235310_LPS; GSE70689_CBD_wLPS	4	DEG_GSE151512_24h; DEG_GSE179661_HepG2; DEG_GSE179661_MHCC97H; DEG_GSE272113_sCBD
TRRAP	9	8	DEG_GSE168797_Mock_CBD; DEG_GSE168797_SARS_CBD; DEG_GSE179661_MHCC97H; DEG_GSE232624_EtOH0.75_CBD0.75_6h; DEG_GSE232624_Veh_CBD0.75_12h; DEG_GSE232624_Veh_CBD3_12h; DEG_GSE261716_CBD10_28d; DEG_GSE261716_CBD20_28d	1	DEG_GSE232624_EtOH0.25_CBD0.75_12h
TSHZ1	9	5	DEG_GSE131565; DEG_GSE151512_24h; DEG_GSE168797_Mock_CBD; DEG_GSE179661_HepG2; DEG_GSE179661_MHCC97H	4	DEG_GSE201508_cGAMP; DEG_GSE235310_LPS; DEG_GSE272113_CBD; DEG_GSE272113_sCBD
TSKU	9	3	DEG_GSE151512_6h; DEG_GSE168797_Mock_CBDV; DEG_GSE179661_MHCC97H	6	DEG_GSE131565; DEG_GSE168797_SARS_CBDV; DEG_GSE179661_HepG2; DEG_GSE235310_Veh; DEG_GSE261716_CBD20_28d; DEG_GSE272113_CBD
TSPAN14	9	8	DEG_GSE151512_24h; DEG_GSE168797_Mock_CBD; DEG_GSE168797_SARS_CBD; DEG_GSE179661_MHCC97H; DEG_GSE201508_cGAMP; DEG_GSE261716_CBD20_28d; DEG_GSE272113_CBD; DEG_GSE272113_sCBD	1	DEG_GSE235310_LPS
TSPAN15	9	5	DEG_GSE168797_Mock_CBD; DEG_GSE168797_SARS_CBD; DEG_GSE235310_LPS; DEG_GSE235310_Veh; DEG_GSE261716_CBD0.2_2d	4	DEG_GSE131565; DEG_GSE151512_24h; DEG_GSE272113_CBD; DEG_GSE272113_sCBD
TSPAN3	9	6	DEG_GSE131565; DEG_GSE179661_HepG2; DEG_GSE179661_MHCC97H; DEG_GSE272113_CBD; DEG_GSE272113_sCBD; DEG_GSE274859_LPS_24h	3	DEG_GSE168797_SARS_CBD; DEG_GSE235310_LPS; DEG_GSE235310_Veh
[truncated: 15,099 more rows]
