# Supplementary material for: Comparative analysis of 105 datasets across species and tissues reveals higher variability in transcriptomic responses to THC than CBD
Source: Research Square preprint supplement (doi:10.21203/rs.3.rs-6857614/v1), 2025-06-13
Supplement: Supplementary file 14 [file d4de7e40e7e0ddd195a7ee5a.xlsx]

## Sheet: CBD_kd_full_results
MODULE	NODE	P	FDR	N.mod	N.neigh	N.obsrv	N.expct	MEMBER	FILL	FOLD
CBD_GSE274859_LPS_24h	SRC	2.5774e-08	3.76301e-06	3255	14	11	1.53171	TRUE	0.785714	7.1815
CBD_GSE151512_6h	MMT00076709	4.09061e-06	0.000298614	1117	44	11	1.65198	FALSE	0.25	6.65868
CBD_GSE151512_12h	SH3GL2	7.44413e-05	0.00362281	1617	34	12	1.84794	FALSE	0.352941	6.49372
CBD_GSE151512_12h	DPYSL5	0.000139009	0.00507383	1617	20	9	1.08702	TRUE	0.45	8.2795
CBD_GSE151512_24h	PPP1R3B	0.00034926	0.00878648	3683	15	11	1.85691	TRUE	0.733333	5.92381
CBD_GSE151512_6h	PRKCA	0.000361088	0.00878648	1117	35	9	1.31407	TRUE	0.257143	6.84893
CBD_GSE151512_6h	SLAMF8	0.000431561	0.00900113	1117	38	9	1.42671	FALSE	0.236842	6.30823
CBD_GSE151512_24h	KIAA0100	0.000537046	0.0098011	3683	33	19	4.08521	TRUE	0.575758	4.65093
CBD_GSE151512_12h	JPH3	0.00066975	0.0108648	1617	28	9	1.52183	FALSE	0.321429	5.91393
CBD_GSE274435_DMSO_24h	SLC17A7	0.00150328	0.0219479	343	45	8	0.518806	FALSE	0.177778	15.42
CBD_GSE151512_6h	SLC9A3R1	0.00196871	0.0261302	1117	43	9	1.61443	TRUE	0.209302	5.57471
CBD_GSE151512_6h	ADRBK1	0.00311084	0.0378485	1117	23	8	0.863534	FALSE	0.347826	9.26426
CBD_GSE151512_24h	TAOK1	0.00397397	0.0446308	3683	83	28	10.2749	FALSE	0.337349	2.72508
CBD_GSE151512_6h	USF1	0.00447828	0.0467021	1117	27	8	1.01371	TRUE	0.296296	7.89177
CBD_GSE151512_24h	AMFR	0.00523953	0.0503891	3683	18	12	2.22829	TRUE	0.666667	5.38528
CBD_GSE151512_12h	MMT00063814	0.00552209	0.0503891	1617	21	8	1.14137	FALSE	0.380952	7.0091
CBD_GSE151512_24h	GRIA4	0.00631907	0.0527941	3683	45	21	5.57074	FALSE	0.466667	3.7697
CBD_GSE151512_24h	RAPGEF4	0.00650886	0.0527941	3683	64	24	7.92283	FALSE	0.375	3.02922
CBD_GSE151512_24h	EPDR1	0.00823288	0.0588243	3683	56	22	6.93247	FALSE	0.392857	3.17347
CBD_GSE274859_LPS_24h	SEC23A	0.00831157	0.0588243	3255	73	24	7.98679	TRUE	0.328767	3.00496
CBD_GSE151512_6h	PIK3R1	0.00846104	0.0588243	1117	30	8	1.12635	TRUE	0.266667	7.1026
CBD_GSE151512_6h	CUL1	0.00937088	0.0621886	1117	26	8	0.976169	FALSE	0.307692	8.1953
CBD_GSE151512_6h	STXBP4	0.0104111	0.0660878	1117	34	8	1.27653	FALSE	0.235294	6.267
CBD_GSE151512_12h	LMNA	0.0125914	0.0765977	1617	22	8	1.19572	TRUE	0.363636	6.6905
CBD_GSE274859_LPS_24h	NASP	0.0150869	0.0849825	3255	14	8	1.53171	TRUE	0.571429	5.22291
CBD_GSE274435_DMSO_24h	EGR2	0.0154312	0.0849825	343	27	7	0.311284	FALSE	0.259259	22.4875
CBD_GSE274859_LPS_24h	MMT00053716	0.0157159	0.0849825	3255	13	8	1.42231	FALSE	0.615385	5.62467
CBD_GSE151512_12h	SDC4	0.0184063	0.095976	1617	26	8	1.41313	TRUE	0.307692	5.6612
CBD_GSE274859_LPS_24h	GPR84	0.0199528	0.100452	3255	14	8	1.53171	TRUE	0.571429	5.22291
CBD_GSE151512_6h	RNF44	0.0239039	0.112723	1117	36	8	1.35162	TRUE	0.222222	5.91883
CBD_GSE151512_24h	SGTB	0.0239343	0.112723	3683	13	8	1.60932	TRUE	0.615385	4.97103
CBD_GSE274859_LPS_24h	BIRC2	0.024771	0.113018	3255	14	8	1.53171	FALSE	0.571429	5.22291
CBD_GSE151512_24h	MMT00076709	0.0259192	0.114673	3683	44	18	5.44694	FALSE	0.409091	3.30461
CBD_GSE274859_LPS_24h	CSRNP3	0.0285579	0.12186	3255	34	17	3.71987	FALSE	0.5	4.57005
CBD_GSE274859_LPS_24h	KLC2	0.029724	0.12186	3255	15	8	1.64112	TRUE	0.533333	4.87472
CBD_GSE151512_12h	TPGS2	0.0300476	0.12186	1617	27	8	1.46748	FALSE	0.296296	5.45152
CBD_GSE274859_LPS_24h	ITGA2B	0.0330164	0.130281	3255	15	8	1.64112	FALSE	0.533333	4.87472
CBD_GSE274859_LPS_24h	PRKACB	0.0432036	0.165993	3255	72	22	7.87738	FALSE	0.305556	2.79281
CBD_GSE151512_24h	STK32C	0.0484494	0.179184	3683	32	15	3.96141	TRUE	0.46875	3.78653
CBD_GSE151512_6h	TRAPPC3	0.0490915	0.179184	1117	40	8	1.5018	TRUE	0.2	5.32695
CBD_GSE151512_6h	SIN3B	0.0544319	0.191953	1117	43	8	1.61443	FALSE	0.186047	4.9553
CBD_GSE151512_12h	EGR4	0.0552192	0.191953	1617	30	8	1.63053	FALSE	0.266667	4.90637
CBD_GSE151512_24h	ZNF664	0.0571211	0.193946	3683	18	11	2.22829	FALSE	0.611111	4.93651
CBD_GSE151512_24h	AKAP11	0.0618866	0.205351	3683	39	18	4.82797	FALSE	0.461538	3.72827
CBD_GSE151512_6h	PSD	0.0637385	0.206796	1117	43	8	1.61443	TRUE	0.186047	4.9553
CBD_GSE151512_12h	MINPP1	0.0707799	0.216327	1617	30	8	1.63053	FALSE	0.266667	4.90637
CBD_GSE151512_12h	SEMA5A	0.0714081	0.216327	1617	31	8	1.68488	TRUE	0.258065	4.7481
CBD_GSE151512_24h	ARHGAP5	0.0714535	0.216327	3683	56	20	6.93247	TRUE	0.357143	2.88497
CBD_GSE151512_24h	DENND4B	0.0726029	0.216327	3683	28	15	3.46624	FALSE	0.535714	4.32746
CBD_GSE151512_24h	POLE4	0.0851309	0.248413	3683	15	9	1.85691	TRUE	0.6	4.84676
CBD_GSE274435_EtOH_24h	RIN1	0.0867744	0.248413	123	40	6	0.165373	FALSE	0.15	36.2817
CBD_GSE274859_LPS_24h	SLU7	0.0896322	0.25166	3255	24	13	2.62579	TRUE	0.541667	4.95088
CBD_GSE274859_LPS_24h	ERGIC3	0.0938431	0.258511	3255	35	16	3.82928	FALSE	0.457143	4.17833
CBD_GSE151512_24h	SH3GL2	0.0995115	0.26905	3683	34	15	4.209	FALSE	0.441176	3.56379
CBD_GSE151512_24h	ATP2C1	0.110213	0.288739	3683	57	20	7.05627	TRUE	0.350877	2.83436
CBD_GSE151512_24h	ATIC	0.112046	0.288739	3683	15	9	1.85691	TRUE	0.6	4.84676
CBD_GSE274859_LPS_24h	CPD	0.112727	0.288739	3255	67	21	7.33034	TRUE	0.313433	2.86481
CBD_GSE274435_DMSO_24h	RASGRP1	0.123079	0.30982	343	70	7	0.807032	TRUE	0.1	8.67376
CBD_GSE151512_12h	ATF5	0.130463	0.322841	1617	19	7	1.03267	FALSE	0.368421	6.77854
CBD_GSE151512_24h	KCNH5	0.14244	0.346605	3683	36	16	4.45659	TRUE	0.444444	3.59019
CBD_GSE151512_12h	POLL	0.151031	0.361484	1617	19	7	1.03267	FALSE	0.368421	6.77854
CBD_GSE274859_LPS_24h	ZNF638	0.156352	0.364152	3255	56	19	6.12685	FALSE	0.339286	3.1011
CBD_GSE151512_6h	PIGT	0.157134	0.364152	1117	26	7	0.976169	FALSE	0.269231	7.17089
CBD_GSE151512_24h	PSD	0.162538	0.370791	3683	43	17	5.32315	TRUE	0.395349	3.1936
CBD_GSE151512_24h	NHSL2	0.170329	0.382334	3683	15	9	1.85691	TRUE	0.6	4.84676
CBD_GSE274859_LPS_24h	NOTCH1	0.17444	0.382334	3255	19	11	2.07875	FALSE	0.578947	5.29163
CBD_GSE151512_12h	QARS	0.175455	0.382334	1617	21	7	1.14137	FALSE	0.333333	6.13296
CBD_GSE151512_24h	LINGO1	0.20131	0.425834	3683	16	10	1.98071	TRUE	0.625	5.0487
CBD_GSE151512_24h	JPH3	0.204078	0.425834	3683	28	14	3.46624	FALSE	0.5	4.03896
CBD_GSE274859_LPS_24h	MLH1	0.204167	0.425834	3255	40	15	4.37632	TRUE	0.375	3.42753
CBD_GSE274859_LPS_24h	PRMT1	0.210725	0.433322	3255	52	17	5.68922	TRUE	0.326923	2.98811
CBD_GSE274859_LPS_24h	ITGAV	0.220125	0.441645	3255	48	16	5.25159	TRUE	0.333333	3.0467
CBD_GSE274859_LPS_24h	ATP6V0A1	0.220823	0.441645	3255	47	16	5.14218	FALSE	0.340426	3.11152
CBD_GSE151512_12h	PRKCA	0.22589	0.445675	1617	35	9	1.90229	TRUE	0.257143	4.73114
CBD_GSE151512_12h	HSD17B7	0.232639	0.45287	1617	22	7	1.19572	TRUE	0.318182	5.85419
CBD_GSE274859_LPS_24h	KPNA3	0.245749	0.466888	3255	51	17	5.57981	TRUE	0.333333	3.0467
CBD_GSE274859_LPS_24h	REPS2	0.246236	0.466888	3255	16	8	1.75053	TRUE	0.5	4.57005
CBD_GSE151512_24h	SIN3B	0.265407	0.496788	3683	43	16	5.32315	TRUE	0.372093	3.00574
CBD_GSE274859_LPS_24h	RANBP2	0.272018	0.501971	3255	30	13	3.28224	FALSE	0.433333	3.96071
CBD_GSE151512_12h	GFRA1	0.277687	0.501971	1617	20	7	1.08702	TRUE	0.35	6.43961
CBD_GSE151512_24h	CHL1	0.281352	0.501971	3683	52	18	6.4373	FALSE	0.346154	2.79621
CBD_GSE151512_24h	ATP1A1	0.287548	0.501971	3683	41	16	5.07556	TRUE	0.390244	3.15236
CBD_GSE274859_LPS_24h	CUEDC1	0.287797	0.501971	3255	40	15	4.37632	TRUE	0.375	3.42753
CBD_GSE274859_LPS_24h	GPBP1	0.295622	0.501971	3255	54	17	5.90804	TRUE	0.314815	2.87744
CBD_GSE274859_LPS_24h	SRPK2	0.298697	0.501971	3255	27	13	2.95402	TRUE	0.481481	4.40079
CBD_GSE151512_24h	NRXN1	0.302158	0.501971	3683	49	18	6.06591	FALSE	0.367347	2.9674
CBD_GSE151512_6h	GPR56	0.30361	0.501971	1117	34	7	1.27653	FALSE	0.205882	5.48362
CBD_GSE274859_LPS_24h	PM20D1	0.305847	0.501971	3255	21	11	2.29757	FALSE	0.52381	4.78767
CBD_GSE151512_12h	CSK	0.305996	0.501971	1617	23	7	1.25008	FALSE	0.304348	5.59966
CBD_GSE151512_6h	MTPN	0.316713	0.513779	1117	32	7	1.20144	FALSE	0.21875	5.82635
CBD_GSE274859_LPS_24h	WAC	0.327816	0.525947	3255	29	13	3.17283	FALSE	0.448276	4.09728
CBD_GSE151512_24h	SMARCC1	0.344326	0.542483	3683	14	8	1.73312	TRUE	0.571429	4.61596
CBD_GSE151512_24h	DHCR24	0.346922	0.542483	3683	43	16	5.32315	TRUE	0.372093	3.00574
CBD_GSE274859_LPS_24h	MPI	0.34927	0.542483	3255	13	7	1.42231	FALSE	0.538462	4.92159
CBD_GSE151512_6h	LSM12	0.360351	0.553802	1117	34	7	1.27653	TRUE	0.205882	5.48362
CBD_GSE151512_12h	KCNJ9	0.376751	0.569054	1617	35	9	1.90229	TRUE	0.257143	4.73114
CBD_GSE151512_24h	ALDH3B1	0.381807	0.569054	3683	18	11	2.22829	TRUE	0.611111	4.93651
CBD_GSE151512_12h	GSR	0.384479	0.569054	1617	25	7	1.35878	FALSE	0.28	5.15169
CBD_GSE274859_LPS_24h	SHISA4	0.386371	0.569054	3255	48	16	5.25159	FALSE	0.333333	3.0467
CBD_GSE151512_24h	TRIM8	0.389763	0.569054	3683	31	14	3.83762	FALSE	0.451613	3.6481
CBD_GSE151512_24h	SETD5	0.396732	0.573494	3683	33	14	4.08521	TRUE	0.424242	3.427
CBD_GSE151512_12h	TRA2A	0.405544	0.576506	1617	27	7	1.46748	TRUE	0.259259	4.77008
CBD_GSE274859_LPS_24h	1422799_at	0.411704	0.576506	3255	19	10	2.07875	FALSE	0.526316	4.81057
CBD_GSE274859_LPS_24h	LGALS3BP	0.41422	0.576506	3255	14	7	1.53171	FALSE	0.5	4.57005
CBD_GSE274859_LPS_24h	UBE2W	0.414611	0.576506	3255	34	14	3.71987	TRUE	0.411765	3.76357
CBD_GSE274859_LPS_24h	CKAP5	0.425847	0.586544	3255	31	13	3.39165	TRUE	0.419355	3.83294
CBD_GSE151512_12h	IER5	0.470166	0.641535	1617	25	7	1.35878	FALSE	0.28	5.15169
CBD_GSE151512_6h	DNAJC10	0.480294	0.644814	1117	36	7	1.35162	FALSE	0.194444	5.17898
CBD_GSE151512_24h	UBE2W	0.481402	0.644814	3683	34	14	4.209	FALSE	0.411765	3.3262
CBD_GSE274859_LPS_24h	PHF11	0.516573	0.676869	3255	14	7	1.53171	FALSE	0.5	4.57005
CBD_GSE151512_24h	SNX13	0.517014	0.676869	3683	57	19	7.05627	FALSE	0.333333	2.69264
CBD_GSE274859_LPS_24h	SLC48A1	0.519242	0.676869	3255	15	7	1.64112	TRUE	0.466667	4.26538
CBD_GSE274859_LPS_24h	MMT00073158	0.536765	0.693519	3255	14	7	1.53171	FALSE	0.5	4.57005
CBD_GSE151512_24h	POLL	0.542058	0.694214	3683	19	11	2.35209	FALSE	0.578947	4.67669
CBD_GSE274859_LPS_24h	GPD1L	0.547988	0.695706	3255	15	7	1.64112	TRUE	0.466667	4.26538
CBD_GSE151512_24h	ZEB2	0.5647	0.705065	3683	49	17	6.06591	TRUE	0.346939	2.80255
CBD_GSE274859_LPS_24h	THEM6	0.56533	0.705065	3255	15	7	1.64112	TRUE	0.466667	4.26538
CBD_GSE151512_24h	CALM1	0.569847	0.705065	3683	17	10	2.1045	TRUE	0.588235	4.75172
CBD_GSE151512_24h	LEF1	0.585576	0.705621	3683	69	22	8.5418	FALSE	0.318841	2.57557
CBD_GSE151512_6h	KCNJ9	0.586928	0.705621	1117	35	7	1.31407	TRUE	0.2	5.32695
CBD_GSE274859_LPS_24h	NM_134158	0.590102	0.705621	3255	18	9	1.96935	FALSE	0.5	4.57005
CBD_GSE151512_24h	WBP1	0.594318	0.705621	3683	13	7	1.60932	TRUE	0.538462	4.34965
CBD_GSE151512_12h	ATP6V0A2	0.599036	0.705621	1617	27	7	1.46748	TRUE	0.259259	4.77008
CBD_GSE151512_6h	MTA3	0.604063	0.705621	1117	39	7	1.46425	FALSE	0.179487	4.78059
CBD_GSE151512_12h	AATK	0.604128	0.705621	1617	27	7	1.46748	FALSE	0.259259	4.77008
CBD_GSE151512_12h	RBM3	0.613923	0.711371	1617	39	10	2.11969	FALSE	0.25641	4.71766
CBD_GSE274859_LPS_24h	NPY1R	0.637254	0.732591	3255	15	7	1.64112	FALSE	0.466667	4.26538
CBD_GSE274859_LPS_24h	MMT00075201	0.643809	0.734345	3255	28	12	3.06343	FALSE	0.428571	3.91718
CBD_GSE151512_24h	NM_173411	0.657264	0.74388	3683	26	12	3.21865	FALSE	0.461538	3.72827
CBD_GSE151512_24h	HSPA4	0.680304	0.760241	3683	21	12	2.59968	FALSE	0.571429	4.61596
CBD_GSE151512_24h	JUND	0.682134	0.760241	3683	23	12	2.84727	FALSE	0.521739	4.21457
CBD_GSE274859_LPS_24h	FXR1	0.695247	0.768986	3255	16	8	1.75053	TRUE	0.5	4.57005
CBD_GSE151512_24h	MGA	0.742632	0.81478	3683	54	18	6.68488	TRUE	0.333333	2.69264
CBD_GSE151512_24h	ITGAV	0.747811	0.81478	3683	48	17	5.94212	TRUE	0.354167	2.86093
CBD_GSE274859_LPS_24h	UBFD1	0.764774	0.824398	3255	24	11	2.62579	TRUE	0.458333	4.18921
CBD_GSE151512_24h	PITPNB	0.767933	0.824398	3683	52	17	6.4373	TRUE	0.326923	2.64086
CBD_GSE274859_LPS_24h	TRIM25	0.782044	0.833419	3255	19	10	2.07875	TRUE	0.526316	4.81057
CBD_GSE274435_DMSO_24h	RIN1	0.78898	0.834718	343	40	6	0.461161	FALSE	0.15	13.0106
CBD_GSE274859_LPS_24h	PSPC1	0.86051	0.902495	3255	29	12	3.17283	TRUE	0.413793	3.78211
CBD_GSE151512_12h	NPTX1	0.865406	0.902495	1617	28	7	1.52183	FALSE	0.25	4.59972
CBD_GSE151512_24h	MINK1	0.917989	0.950542	3683	37	14	4.58038	FALSE	0.378378	3.05651
CBD_GSE151512_24h	NUDT13	0.933574	0.959872	3683	18	10	2.22829	TRUE	0.555556	4.48774
CBD_GSE151512_24h	PIK3CA	0.943362	0.963153	3683	38	14	4.70418	TRUE	0.368421	2.97608
CBD_GSE151512_24h	PAK2	0.957007	0.964385	3683	32	13	3.96141	FALSE	0.40625	3.28166
CBD_GSE274859_LPS_24h	MTHFD2	0.957779	0.964385	3255	15	7	1.64112	FALSE	0.466667	4.26538
CBD_GSE151512_24h	TRA2A	0.998654	0.998654	3683	27	12	3.34244	TRUE	0.444444	3.59019

## Sheet: THC_kd_full_results
MODULE	NODE	P	FDR	N.mod	N.neigh	N.obsrv	N.expct	MEMBER	FILL	FOLD
THC_GSE189821_Female_Amy	RASL10A	7.36704e-29	2.09961e-26	771	37	18	0.958859	TRUE	0.486486	18.7723
THC_GSE189821_Female_Amy	SLC17A7	1.30431e-25	1.85863e-23	771	45	17	1.16618	TRUE	0.377778	14.5775
THC_GSE189821_Female_Amy	AK013906	3.71507e-25	3.52931e-23	771	44	17	1.14026	FALSE	0.386364	14.9088
THC_GSE189821_Female_Amy	RTN4R	4.22179e-24	3.00803e-22	771	50	17	1.29575	TRUE	0.34	13.1198
THC_GSE189821_Female_Amy	RIN1	1.14618e-22	6.53323e-21	771	40	16	1.0366	FALSE	0.4	15.435
THC_GSE189821_Female_Amy	PTK2B	3.86215e-22	1.83452e-20	771	39	16	1.01069	TRUE	0.410256	15.8308
THC_GSE235969_Male_Young_5wk	FOLR1	1.28697e-21	5.2398e-20	19	41	12	0.026184	TRUE	0.292683	458.295
THC_GSE189821_Female_Amy	BCL11B	3.28636e-21	1.17076e-19	771	53	16	1.3735	TRUE	0.301887	11.6491
THC_GSE189821_Female_Amy	ICAM5	3.72389e-19	1.17923e-17	771	39	15	1.01069	TRUE	0.384615	14.8414
THC_GSE116813_vehicle	FMOD	9.12963e-18	2.60195e-16	133	80	14	0.357635	FALSE	0.175	39.1461
THC_GSE189821_Female_Amy	NEUROD6	9.07678e-17	2.35171e-15	771	40	14	1.0366	TRUE	0.35	13.5056
THC_GSE189821_Female_Amy	NGB	1.66718e-16	3.95955e-15	771	45	14	1.16618	TRUE	0.311111	12.005
THC_GSE189821_Female_Amy	ITPKA	2.42775e-15	5.32238e-14	771	53	14	1.3735	TRUE	0.264151	10.1929
THC_GSE116813_vehicle	PCOLCE	3.09674e-15	6.30408e-14	133	69	13	0.30846	TRUE	0.188406	42.1448
THC_GSE189821_Female_Amy	MMT00061448	3.97969e-15	7.5614e-14	771	74	23	1.91772	FALSE	0.310811	11.9934
THC_GSE189821_Female_Amy	CCK	4.44113e-15	7.91077e-14	771	58	14	1.50308	FALSE	0.241379	9.31424
THC_GSE116813_vehicle	COLEC12	1.87687e-14	3.14652e-13	133	40	12	0.178818	TRUE	0.3	67.1075
THC_GSE235969_Male_Young_5wk	C2orf40	3.27057e-14	5.17841e-13	19	43	10	0.0274613	FALSE	0.232558	364.149
THC_GSE189821_Female_Amy	NRGN	8.89106e-14	1.33366e-12	771	33	13	0.855198	FALSE	0.393939	15.2012
THC_GSE235969_Male_Young_5wk	STEAP1	1.95501e-13	2.78589e-12	19	58	10	0.0370408	TRUE	0.172414	269.973
THC_GSE189821_Female_Amy	CHRM1	3.46739e-13	4.70574e-12	771	45	13	1.16618	TRUE	0.288889	11.1475
THC_GSE189821_Female_Amy	AK033929	6.13491e-13	7.9475e-12	771	42	13	1.08843	FALSE	0.309524	11.9438
THC_GSE116813_vehicle	ALDH1A2	7.94038e-13	9.64085e-12	133	61	12	0.272697	TRUE	0.196721	44.0049
THC_GSE116813_vehicle	SERPING1	8.11861e-13	9.64085e-12	133	67	12	0.299519	TRUE	0.179104	40.0642
THC_GSE273695_Brain_Male_LPS	CREBBP	2.37676e-12	2.7095e-11	771	57	13	1.47716	FALSE	0.22807	8.80067
THC_GSE235969_Male_Young_5wk	AQP1	2.67351e-12	2.93057e-11	19	19	9	0.012134	TRUE	0.473684	741.715
THC_GSE189821_Female_Amy	DDN	3.54394e-12	3.74083e-11	771	15	12	0.388726	TRUE	0.8	30.87
THC_GSE273695_Brain_Male_LPS	KIAA1109	6.58951e-12	6.70718e-11	771	55	13	1.42533	TRUE	0.236364	9.12069
THC_GSE189821_Female_Amy	MMT00031885	2.35495e-11	2.31435e-10	771	28	12	0.725623	FALSE	0.428571	16.5375
THC_GSE116813_vehicle	LUM	4.60701e-11	4.37666e-10	133	45	11	0.20117	FALSE	0.244444	54.6802
THC_GSE189821_Female_Amy	SCN9A	6.58946e-11	6.05805e-10	771	64	13	1.65857	FALSE	0.203125	7.8381
THC_GSE235969_Male_Young_5wk	AK013627	6.84783e-11	6.09885e-10	19	36	10	0.0229908	FALSE	0.277778	434.956
THC_GSE116813_vehicle	SLC13A4	8.36688e-11	7.22594e-10	133	60	11	0.268226	TRUE	0.183333	41.0102
THC_GSE116813_vehicle	SLC6A20	8.97795e-11	7.52564e-10	133	58	11	0.259285	TRUE	0.189655	42.4243
THC_GSE189821_Female_Amy	FEZF2	1.50898e-10	1.22874e-09	771	40	12	1.0366	FALSE	0.3	11.5763
THC_GSE189821_Female_Amy	LHX2	2.45009e-10	1.93965e-09	771	50	12	1.29575	FALSE	0.24	9.26101
THC_GSE189821_Female_Amy	OTP	5.2725e-10	4.06125e-09	771	54	12	1.39942	FALSE	0.222222	8.57501
THC_GSE189821_Female_Amy	IQGAP2	6.46895e-10	4.85171e-09	771	53	12	1.3735	TRUE	0.226415	8.7368
THC_GSE116813_vehicle	PTGDS	1.18854e-09	8.68547e-09	133	35	10	0.156465	FALSE	0.285714	63.9119
THC_GSE116813_vehicle	CP	1.74268e-09	1.24166e-08	133	49	11	0.219051	TRUE	0.22449	50.2165
THC_GSE273695_Brain_Female_LPS	FMOD	1.87053e-09	1.30025e-08	25	80	9	0.0672246	TRUE	0.1125	133.88
THC_GSE189821_Female_Amy	KCNV1	2.2436e-09	1.52244e-08	771	22	11	0.570132	TRUE	0.5	19.2938
THC_GSE116813_vehicle	EFEMP1	2.35132e-09	1.55843e-08	133	40	10	0.178818	TRUE	0.25	55.9229
THC_GSE116813_vehicle	ISLR	3.80284e-09	2.4632e-08	133	43	10	0.192229	TRUE	0.232558	52.0213
THC_GSE189821_Female_Amy	CRYM	7.98095e-09	5.04791e-08	771	36	11	0.932943	FALSE	0.305556	11.7906
THC_GSE189821_Female_Amy	HPCA	8.14751e-09	5.04791e-08	771	27	11	0.699708	TRUE	0.407407	15.7209
THC_GSE235969_Male_Young_5wk	F5	8.98006e-09	5.44535e-08	19	32	8	0.0204363	TRUE	0.25	391.461
THC_GSE189821_Female_Amy	CNGB1	9.59093e-09	5.65112e-08	771	47	11	1.21801	TRUE	0.234043	9.03113
THC_GSE189821_Female_Amy	PIK3R2	9.71596e-09	5.65112e-08	771	34	11	0.881113	TRUE	0.323529	12.4842
THC_GSE189821_Female_Amy	ATP2B1	1.39341e-08	7.94242e-08	771	39	11	1.01069	TRUE	0.282051	10.8837
THC_GSE189821_Female_Amy	ECEL1	1.8086e-08	1.01069e-07	771	45	11	1.16618	FALSE	0.244444	9.43251
THC_GSE189821_Female_Amy	CALCR	3.35592e-08	1.8393e-07	771	47	11	1.21801	FALSE	0.234043	9.03113
THC_GSE213734_vehicle	DUSP1	4.17018e-08	2.24246e-07	45	22	8	0.0332762	TRUE	0.363636	240.412
THC_GSE235969_Male_Young_5wk	COL8A1	5.01255e-08	2.64551e-07	19	41	8	0.026184	FALSE	0.195122	305.53
THC_GSE235969_Male_Young_5wk	CALML4	6.98129e-08	3.61757e-07	19	51	8	0.0325703	TRUE	0.156863	245.622
THC_GSE189821_Female_Amy	MAS1	9.42048e-08	4.79435e-07	771	17	10	0.440557	TRUE	0.588235	22.6986
THC_GSE189821_Female_Amy	MMT00069128	1.114e-07	5.57e-07	771	16	10	0.414642	FALSE	0.625	24.1172
THC_GSE189821_Female_Amy	IRS4	1.4907e-07	7.32498e-07	771	55	11	1.42533	TRUE	0.2	7.71751
THC_GSE235969_Male_Young_5wk	KCNE2	1.70405e-07	8.23142e-07	19	27	8	0.0172431	TRUE	0.296296	463.953
THC_GSE273695_Brain_Male_LPS	ACSL4	3.14023e-07	1.49161e-06	771	21	10	0.544217	FALSE	0.47619	18.375
THC_GSE189821_Female_Amy	RASGRP1	3.42372e-07	1.59961e-06	771	70	14	1.81406	TRUE	0.2	7.71751
THC_GSE273695_Brain_Female_LPS	SERPING1	3.98611e-07	1.83232e-06	25	67	8	0.0563006	FALSE	0.119403	142.094
THC_GSE116813_vehicle	BMP4	4.10127e-07	1.85534e-06	133	14	8	0.0625861	FALSE	0.571429	127.824
THC_GSE116813_vehicle	COL1A2	4.4145e-07	1.96583e-06	133	44	9	0.196699	TRUE	0.204545	45.7551
THC_GSE189821_Female_Amy	ZCCHC12	4.50526e-07	1.97538e-06	771	35	10	0.907028	TRUE	0.285714	11.025
THC_GSE189821_Female_Amy	NPTX2	5.02274e-07	2.16891e-06	771	24	10	0.621962	TRUE	0.416667	16.0781
THC_GSE189821_Female_Amy	MATN2	6.27374e-07	2.66868e-06	771	27	10	0.699708	TRUE	0.37037	14.2917
THC_GSE273695_Brain_Male_LPS	RASGRP1	7.04383e-07	2.9522e-06	771	70	14	1.81406	TRUE	0.2	7.71751
THC_GSE189821_Female_Amy	PPP1R1B	7.42904e-07	3.06852e-06	771	32	10	0.829283	TRUE	0.3125	12.0586
THC_GSE273695_Brain_Male_LPS	HOOK1	8.53693e-07	3.47575e-06	771	35	10	0.907028	FALSE	0.285714	11.025
THC_GSE189821_Female_Amy	PHACTR1	1.18051e-06	4.73866e-06	771	33	10	0.855198	TRUE	0.30303	11.6932
THC_GSE189821_Female_Amy	FOXG1	1.34269e-06	5.31483e-06	771	38	10	0.984774	TRUE	0.263158	10.1546
THC_GSE189821_Female_Amy	DLGAP3	1.4967e-06	5.84328e-06	771	35	10	0.907028	TRUE	0.285714	11.025
THC_GSE189821_Female_Amy	TBR1	1.57479e-06	6.06507e-06	771	37	10	0.958859	TRUE	0.27027	10.4291
THC_GSE189821_Female_Amy	ZNF238	1.88019e-06	7.14471e-06	771	39	10	1.01069	FALSE	0.25641	9.89424
THC_GSE189821_Female_Amy	GPX3	2.0319e-06	7.61963e-06	771	37	10	0.958859	TRUE	0.27027	10.4291
THC_GSE189821_Female_Amy	AGT	2.18319e-06	7.99277e-06	771	36	10	0.932943	TRUE	0.277778	10.7188
THC_GSE273695_Brain_Male_LPS	SYT1	2.20266e-06	7.99277e-06	771	46	10	1.19209	TRUE	0.217391	8.3886
THC_GSE189821_Female_Amy	ADORA2A	2.21554e-06	7.99277e-06	771	36	10	0.932943	TRUE	0.277778	10.7188
THC_GSE189821_Female_Amy	FEZF1	5.05894e-06	1.80225e-05	771	69	13	1.78814	TRUE	0.188406	7.27012
THC_GSE235969_Male_Young_5wk	KL	6.17362e-06	2.1722e-05	19	42	7	0.0268226	FALSE	0.166667	260.974
THC_GSE273695_Brain_Male_LPS	ARHGAP5	6.60247e-06	2.29476e-05	771	56	10	1.45125	FALSE	0.178571	6.89063
THC_GSE116813_vehicle	CYP1B1	7.74854e-06	2.66064e-05	133	49	10	0.219051	TRUE	0.204082	45.6514
THC_GSE116813_vehicle	GYPC	1.01044e-05	3.42827e-05	133	27	8	0.120702	FALSE	0.296296	66.279
THC_GSE213734_vehicle	JUNB	1.09829e-05	3.68251e-05	45	18	7	0.027226	FALSE	0.388889	257.107
THC_GSE189821_Female_Amy	MMT00036684	1.4121e-05	4.67962e-05	771	17	9	0.440557	FALSE	0.529412	20.4287
THC_GSE189821_Female_Amy	GABRD	2.20892e-05	7.23611e-05	771	57	10	1.47716	TRUE	0.175439	6.76975
THC_GSE116813_vehicle	TFPI	2.78193e-05	9.00965e-05	133	31	8	0.138584	FALSE	0.258065	57.7269
THC_GSE235969_Male_Young_5wk	MSX1	2.94857e-05	9.44206e-05	19	60	7	0.038318	FALSE	0.116667	182.682
THC_GSE116813_vehicle	BGN	4.40413e-05	0.000139464	133	49	10	0.219051	FALSE	0.204082	45.6514
THC_GSE189821_Female_Amy	SH3RF2	4.98362e-05	0.00015608	771	23	9	0.596047	FALSE	0.391304	15.0995
THC_GSE273695_Brain_Female_LPS	BGN	5.2606e-05	0.000162964	25	49	7	0.0411751	FALSE	0.142857	170.006
THC_GSE189821_Female_Amy	PSRC1	5.44527e-05	0.000166871	771	24	9	0.621962	FALSE	0.375	14.4703
THC_GSE189821_Female_Amy	TMEM130	5.98771e-05	0.000181542	771	29	9	0.751538	TRUE	0.310345	11.9754
THC_GSE189821_Female_Amy	EPHA4	6.07407e-05	0.000182222	771	68	12	1.76223	TRUE	0.176471	6.80957
THC_GSE189821_Female_Amy	EGR3	6.64994e-05	0.00019742	771	29	9	0.751538	TRUE	0.310345	11.9754
THC_GSE189821_Female_Amy	MMT00057658	6.87307e-05	0.000201941	771	26	9	0.673792	FALSE	0.346154	13.3572
THC_GSE273695_Brain_Female_LPS	ALDH1A2	7.1301e-05	0.000207355	25	61	7	0.0512588	TRUE	0.114754	136.562
THC_GSE189821_Female_Amy	EPHA7	7.94674e-05	0.00022877	771	28	9	0.725623	TRUE	0.321429	12.4031
THC_GSE189821_Female_Amy	HAP1	8.41639e-05	0.000239867	771	67	12	1.73631	TRUE	0.179104	6.9112
THC_GSE189821_Female_Amy	SLC7A8	8.69031e-05	0.000245221	771	31	9	0.803368	TRUE	0.290323	11.2028
THC_GSE189821_Female_Amy	NEUROD2	9.42044e-05	0.000263218	771	32	9	0.829283	TRUE	0.28125	10.8527
THC_GSE189821_Female_Amy	ADCY1	0.000106428	0.000294486	771	49	12	1.26984	TRUE	0.244898	9.45001
THC_GSE189821_Female_Amy	CRLF1	0.000120791	0.000331013	771	30	9	0.777453	FALSE	0.3	11.5763
THC_GSE116813_vehicle	OGN	0.000126769	0.000340856	133	56	8	0.250345	FALSE	0.142857	31.956
THC_GSE189821_Female_Amy	SMOC2	0.000126774	0.000340856	771	37	9	0.958859	TRUE	0.243243	9.38616
THC_GSE235969_Male_Young_5wk	mCT145470	0.000141931	0.000378039	19	13	6	0.00830224	FALSE	0.461538	722.696
THC_GSE273695_Brain_Male_LPS	AKAP9	0.000153325	0.000403357	771	65	10	1.68448	TRUE	0.153846	5.93655
THC_GSE273695_Brain_Male_LPS	SYNE1	0.000154266	0.000403357	771	41	9	1.06252	FALSE	0.219512	8.47044
THC_GSE189821_Female_Amy	TRH	0.000158919	0.000411593	771	41	9	1.06252	FALSE	0.219512	8.47044
THC_GSE189821_Female_Amy	ITIH3	0.000160304	0.000411593	771	34	9	0.881113	TRUE	0.264706	10.2144
THC_GSE189821_Female_Amy	CCBE1	0.000187922	0.000478194	771	38	9	0.984774	FALSE	0.236842	9.13916
THC_GSE189821_Female_Amy	CAMK2A	0.000211726	0.000534	771	42	9	1.08843	TRUE	0.214286	8.26876
THC_GSE189821_Female_Amy	MMT00034210	0.000250226	0.000621895	771	75	13	1.94363	FALSE	0.173333	6.68851
THC_GSE273695_Brain_Male_LPS	ZNF800	0.00025094	0.000621895	771	44	9	1.14026	FALSE	0.204545	7.89291
THC_GSE189821_Female_Amy	RTN4RL1	0.000260305	0.000639542	771	43	9	1.11435	TRUE	0.209302	8.07646
THC_GSE189821_Female_Amy	KALRN	0.000298619	0.000727404	771	41	9	1.06252	TRUE	0.219512	8.47044
THC_GSE189821_Female_Amy	WNT9A	0.000302027	0.000729472	771	47	9	1.21801	TRUE	0.191489	7.38911
THC_GSE189821_Female_Amy	DLGAP1	0.000311092	0.000745053	771	51	9	1.32167	TRUE	0.176471	6.80957
THC_GSE189821_Female_Amy	NTS	0.000394043	0.000935851	771	44	9	1.14026	TRUE	0.204545	7.89291
THC_GSE116813_vehicle	BMP6	0.000431103	0.00101541	133	22	7	0.0983496	TRUE	0.318182	71.1746
THC_GSE116813_vehicle	TXNIP	0.000665364	0.00155433	133	27	7	0.120702	TRUE	0.259259	57.9942
THC_GSE189821_Female_Amy	TMIE	0.000735619	0.00170448	771	15	8	0.388726	TRUE	0.533333	20.58
THC_GSE273695_Brain_Female_LPS	OSR1	0.00122845	0.00282346	25	34	6	0.0285705	FALSE	0.176471	210.007
THC_GSE189821_Female_Amy	RGS14	0.00140503	0.00320347	771	18	8	0.466472	TRUE	0.444444	17.15
THC_GSE235969_Male_Young_5wk	MMT00038006	0.00143457	0.00324486	19	29	6	0.0185204	FALSE	0.206897	323.967
THC_GSE189821_Female_Amy	BB002565	0.00146614	0.00329015	771	22	8	0.570132	FALSE	0.363636	14.0318
THC_GSE213734_vehicle	NR4A1	0.00155357	0.00345912	45	19	6	0.0287385	TRUE	0.315789	208.779
THC_GSE189821_Female_Amy	SLC26A4	0.00171177	0.00375732	771	26	8	0.673792	FALSE	0.307692	11.8731
THC_GSE116813_vehicle	EMP3	0.00171387	0.00375732	133	30	7	0.134113	FALSE	0.233333	52.1947
THC_GSE213734_vehicle	CYR61	0.00181692	0.00395285	45	24	6	0.0363013	FALSE	0.25	165.283
THC_GSE189821_Female_Amy	CAMK1D	0.00208123	0.00449356	771	25	8	0.647877	TRUE	0.32	12.348
THC_GSE189821_Female_Amy	ARHGEF17	0.00211879	0.00454026	771	21	8	0.544217	TRUE	0.380952	14.7
THC_GSE213734_vehicle	EGR2	0.0021443	0.00456064	45	27	6	0.040839	TRUE	0.222222	146.919
THC_GSE273695_Brain_Female_LPS	THBD	0.002264	0.00477956	25	46	6	0.0386542	FALSE	0.130435	155.223
THC_GSE189821_Female_Amy	FSCN1	0.00229717	0.00481393	771	28	8	0.725623	TRUE	0.285714	11.025
THC_GSE273695_Brain_Male_LPS	PTPRD	0.00236438	0.00491382	771	27	8	0.699708	TRUE	0.296296	11.4333
THC_GSE116813_vehicle	DCN	0.00237932	0.00491382	133	38	7	0.169877	FALSE	0.184211	41.2064
THC_GSE189821_Female_Amy	LAMP5	0.00240781	0.00493687	771	23	8	0.596047	FALSE	0.347826	13.4218
THC_GSE273695_Brain_Male_LPS	MEF2A	0.00245131	0.00499017	771	26	8	0.673792	TRUE	0.307692	11.8731
THC_GSE116813_vehicle	SLC6A13	0.0024704	0.00499336	133	40	7	0.178818	FALSE	0.175	39.1461
THC_GSE189821_Female_Amy	MMT00017065	0.00252404	0.00506586	771	27	8	0.699708	FALSE	0.296296	11.4333
THC_GSE189821_Female_Amy	GDPD2	0.00255593	0.00509398	771	24	8	0.621962	TRUE	0.333333	12.8625
THC_GSE189821_Female_Amy	RTN4RL2	0.00265155	0.00524786	771	23	8	0.596047	TRUE	0.347826	13.4218
THC_GSE235969_Male_Young_5wk	TTR	0.00276521	0.00543506	19	34	6	0.0217136	TRUE	0.176471	276.325
THC_GSE189821_Female_Amy	MAGEL2	0.00280413	0.00547382	771	26	8	0.673792	TRUE	0.307692	11.8731
THC_GSE189821_Female_Amy	OXT	0.00283219	0.00549097	771	29	8	0.751538	FALSE	0.275862	10.6448
THC_GSE273695_Brain_Male_LPS	ZFP91	0.00298896	0.00575576	771	26	8	0.673792	FALSE	0.307692	11.8731
THC_GSE189821_Female_Amy	CHN1	0.00306828	0.00586886	771	34	8	0.881113	TRUE	0.235294	9.07942
THC_GSE189821_Female_Amy	SKI	0.00318081	0.00604355	771	29	8	0.751538	FALSE	0.275862	10.6448
THC_GSE213734_vehicle	EGR4	0.00335641	0.00633494	45	30	6	0.0453766	TRUE	0.2	132.227
THC_GSE189821_Female_Amy	ARHGAP6	0.00346278	0.00649271	771	77	12	1.99546	FALSE	0.155844	6.01364
THC_GSE273695_Brain_Male_LPS	DGKH	0.00374955	0.00698446	771	27	8	0.699708	TRUE	0.296296	11.4333
THC_GSE189821_Female_Amy	AK033941	0.00378363	0.00700218	771	31	8	0.803368	FALSE	0.258065	9.95808
THC_GSE273695_Brain_Male_LPS	DNM3	0.00395831	0.00727818	771	34	8	0.881113	TRUE	0.235294	9.07942
THC_GSE189821_Female_Amy	MICAL2	0.00401998	0.00734419	771	29	8	0.751538	TRUE	0.275862	10.6448
THC_GSE273695_Brain_Male_LPS	HDAC9	0.00411749	0.00747443	771	34	8	0.881113	TRUE	0.235294	9.07942
THC_GSE273695_Brain_Female_LPS	SLC6A20	0.00440414	0.00794417	25	58	6	0.0487379	FALSE	0.103448	123.108
THC_GSE189821_Female_Amy	ANXA11	0.00449926	0.00806472	771	31	8	0.803368	TRUE	0.258065	9.95808
THC_GSE213734_vehicle	FOS	0.00465636	0.00829414	45	36	6	0.054452	FALSE	0.166667	110.189
THC_GSE189821_Female_Amy	BEX1	0.00486369	0.00859719	771	38	8	0.984774	TRUE	0.210526	8.12369
THC_GSE189821_Female_Amy	NELF	0.00490072	0.00859719	771	32	8	0.829283	FALSE	0.25	9.64689
THC_GSE116813_vehicle	COL3A1	0.00491699	0.00859719	133	44	7	0.196699	FALSE	0.159091	35.5873
THC_GSE189821_Female_Amy	CACNB4	0.00553652	0.00962139	771	42	8	1.08843	FALSE	0.190476	7.35001
THC_GSE189821_Female_Amy	AK079334	0.00577391	0.00997312	771	31	8	0.803368	FALSE	0.258065	9.95808
THC_GSE116813_vehicle	FOXC2	0.00628396	0.0107887	133	56	7	0.250345	FALSE	0.125	27.9615
THC_GSE189821_Female_Amy	IL16	0.0072059	0.0122975	771	42	8	1.08843	FALSE	0.190476	7.35001
THC_GSE189821_Female_Amy	AKAP5	0.00760294	0.0128527	771	38	8	0.984774	FALSE	0.210526	8.12369
THC_GSE273695_Brain_Male_LPS	GAD2	0.00762141	0.0128527	771	37	8	0.958859	TRUE	0.216216	8.34325
THC_GSE273695_Brain_Male_LPS	NBEAL1	0.00798988	0.0133948	771	38	8	0.984774	FALSE	0.210526	8.12369
THC_GSE189821_Female_Amy	KCNAB1	0.00895114	0.0149186	771	43	8	1.11435	FALSE	0.186047	7.17908
THC_GSE273695_Brain_Male_LPS	BACH1	0.0113459	0.0188	771	44	8	1.14026	FALSE	0.181818	7.01592
THC_GSE273695_Brain_Male_LPS	ITGAV	0.0122849	0.0202305	771	48	8	1.24392	FALSE	0.166667	6.43126
THC_GSE273695_Brain_Male_LPS	ZNF292	0.0123513	0.0202305	771	43	8	1.11435	FALSE	0.186047	7.17908
THC_GSE116813_vehicle	PTGIS	0.0150535	0.0245157	133	20	6	0.0894088	FALSE	0.3	67.1075
THC_GSE273695_Brain_Male_LPS	SACS	0.0205651	0.0333015	771	48	8	1.24392	TRUE	0.166667	6.43126
THC_GSE273695_Brain_Male_LPS	TAOK1	0.0243722	0.0392434	771	83	13	2.15095	TRUE	0.156627	6.04383
THC_GSE235969_Male_Young_5wk	SLC4A5	0.027218	0.0435793	19	20	5	0.0127727	TRUE	0.25	391.461
THC_GSE189821_Female_Amy	CNIH3	0.0281367	0.0447987	771	15	7	0.388726	TRUE	0.466667	18.0075
THC_GSE189821_Female_Amy	PGBD5	0.0298587	0.0472763	771	15	7	0.388726	TRUE	0.466667	18.0075
THC_GSE189821_Female_Amy	YWHAZ	0.0300717	0.0473504	771	49	10	1.26984	TRUE	0.204082	7.87501
THC_GSE189821_Female_Amy	SIPA1L1	0.0307599	0.048168	771	20	7	0.518302	FALSE	0.35	13.5056
THC_GSE235969_Male_Young_5wk	ACOX2	0.0345248	0.0537682	19	24	5	0.0153272	FALSE	0.208333	326.217
THC_GSE273695_Brain_Male_LPS	CIT	0.0348972	0.0540527	771	58	8	1.50308	TRUE	0.137931	5.32242
THC_GSE235969_Male_Young_5wk	ENSMUST00000070741	0.0358232	0.0551871	19	21	5	0.0134113	FALSE	0.238095	372.82
THC_GSE116813_vehicle	FBLN1	0.0363421	0.0556854	133	26	6	0.116231	TRUE	0.230769	51.6212
THC_GSE273695_Brain_Male_LPS	CPD	0.0384168	0.0585496	771	67	9	1.73631	TRUE	0.134328	5.1834
THC_GSE116813_vehicle	IGF2	0.0392598	0.0595162	133	27	6	0.120702	TRUE	0.222222	49.7093
THC_GSE189821_Female_Amy	GABRA3	0.0417433	0.0629462	771	58	8	1.50308	FALSE	0.137931	5.32242
THC_GSE189821_Female_Amy	IGSF1	0.0440634	0.0660951	771	21	7	0.544217	TRUE	0.333333	12.8625
THC_GSE235969_Male_Young_5wk	KRT8	0.0485222	0.0724022	19	37	5	0.0236295	FALSE	0.135135	211.6
THC_GSE189821_Female_Amy	KLHL2	0.0493607	0.0732698	771	20	7	0.518302	FALSE	0.35	13.5056
THC_GSE116813_vehicle	RBP1	0.0500832	0.0739571	133	30	6	0.134113	FALSE	0.2	44.7383
THC_GSE189821_Female_Amy	FHL2	0.0527914	0.0775544	771	20	7	0.518302	TRUE	0.35	13.5056
THC_GSE116813_vehicle	BMP7	0.0534858	0.0781715	133	30	6	0.134113	TRUE	0.2	44.7383
THC_GSE189821_Female_Amy	GNG7	0.0562787	0.0818338	771	22	7	0.570132	TRUE	0.318182	12.2779
THC_GSE235969_Male_Young_5wk	COX8BP	0.0573063	0.0825223	19	29	5	0.0185204	FALSE	0.172414	269.973
THC_GSE235969_Male_Young_5wk	WDR86	0.0573313	0.0825223	19	33	5	0.0210749	FALSE	0.151515	237.249
THC_GSE189821_Female_Amy	MYO5B	0.0627044	0.0898028	771	25	7	0.647877	TRUE	0.28	10.8045
THC_GSE116813_vehicle	CXCL12	0.0645364	0.0919644	133	33	6	0.147524	TRUE	0.181818	40.6712
THC_GSE116813_vehicle	CTGF	0.0653217	0.0926203	133	35	6	0.156465	FALSE	0.171429	38.3472
THC_GSE189821_Female_Amy	OLFML2B	0.0674343	0.0951424	771	24	7	0.621962	FALSE	0.291667	11.2547
THC_GSE116813_vehicle	TBX18	0.0679609	0.0953088	133	32	6	0.143054	FALSE	0.1875	41.9422
THC_GSE235969_Male_Young_5wk	CA12	0.068221	0.0953088	19	41	5	0.026184	FALSE	0.121951	190.956
THC_GSE189821_Female_Amy	RESP18	0.0714749	0.0993675	771	25	7	0.647877	TRUE	0.28	10.8045
THC_GSE235969_Male_Young_5wk	ENPP2	0.0721202	0.099778	19	45	5	0.0287385	FALSE	0.111111	173.982
THC_GSE213734_vehicle	MMS010144669	0.0732224	0.100813	45	15	5	0.0226883	FALSE	0.333333	220.378
THC_GSE213734_vehicle	EGR1	0.0764545	0.104757	45	21	5	0.0317636	TRUE	0.238095	157.413
THC_GSE273695_Brain_Male_LPS	SLC4A4	0.0783191	0.106323	771	24	7	0.621962	FALSE	0.291667	11.2547
THC_GSE189821_Female_Amy	AK013824	0.0785193	0.106323	771	24	7	0.621962	FALSE	0.291667	11.2547
THC_GSE189821_Female_Amy	FMNL1	0.0787165	0.106323	771	23	7	0.596047	FALSE	0.304348	11.744
THC_GSE189821_Female_Amy	MLIP	0.0795767	0.106978	771	25	7	0.647877	FALSE	0.28	10.8045
THC_GSE213734_vehicle	BTG2	0.0803684	0.107535	45	18	5	0.027226	TRUE	0.277778	183.648
THC_GSE273695_Brain_Male_LPS	SHPRH	0.0810226	0.107904	771	25	7	0.647877	TRUE	0.28	10.8045
THC_GSE116813_vehicle	HCAR1	0.082038	0.108748	133	41	6	0.183288	FALSE	0.146341	32.7354
THC_GSE235969_Male_Young_5wk	LBP	0.0831004	0.109301	19	46	5	0.0293772	TRUE	0.108696	170.2
THC_GSE116813_vehicle	COL1A1	0.083222	0.109301	133	40	6	0.178818	FALSE	0.15	33.5538
THC_GSE189821_Female_Amy	POU3F1	0.0838376	0.109604	771	26	7	0.673792	FALSE	0.269231	10.389
THC_GSE189821_Female_Amy	SPRN	0.0851686	0.110836	771	26	7	0.673792	TRUE	0.269231	10.389
THC_GSE189821_Female_Amy	NM_028842	0.0860422	0.111464	771	26	7	0.673792	FALSE	0.269231	10.389
THC_GSE273695_Brain_Male_LPS	NRCAM	0.0892049	0.115038	771	26	7	0.673792	TRUE	0.269231	10.389
THC_GSE273695_Brain_Female_LPS	CTGF	0.0936644	0.120245	25	35	5	0.0294108	FALSE	0.142857	170.006
THC_GSE116813_vehicle	CEBPD	0.0982042	0.125508	133	37	6	0.165406	FALSE	0.162162	36.2743
THC_GSE273695_Brain_Male_LPS	KIAA0368	0.0995091	0.126608	771	31	7	0.803368	FALSE	0.225806	8.71332
THC_GSE235969_Male_Young_5wk	KRT18	0.108553	0.137501	19	53	5	0.0338476	TRUE	0.0943396	147.721
THC_GSE273695_Brain_Male_LPS	AFTPH	0.113719	0.143407	771	27	7	0.699708	FALSE	0.259259	10.0042
THC_GSE273695_Brain_Male_LPS	KCNMA1	0.114419	0.143654	771	37	7	0.958859	TRUE	0.189189	7.30035
THC_GSE189821_Female_Amy	GPR88	0.115673	0.144591	771	32	7	0.829283	TRUE	0.21875	8.44103
THC_GSE189821_Female_Amy	MMT00032844	0.118596	0.147598	771	32	7	0.829283	FALSE	0.21875	8.44103
THC_GSE189821_Female_Amy	LMO4	0.120678	0.149536	771	32	7	0.829283	TRUE	0.21875	8.44103
THC_GSE116813_vehicle	ASGR1	0.122381	0.15099	133	43	6	0.192229	FALSE	0.139535	31.2128
THC_GSE189821_Female_Amy	TIAM1	0.123468	0.151352	771	35	7	0.907028	FALSE	0.2	7.71751
THC_GSE273695_Brain_Female_LPS	SLC6A13	0.123737	0.151352	25	40	5	0.0336123	FALSE	0.125	148.755
THC_GSE116813_vehicle	FGFBP1	0.125658	0.153045	133	42	6	0.187758	FALSE	0.142857	31.956
THC_GSE189821_Female_Amy	GAL	0.129731	0.157333	771	34	7	0.881113	FALSE	0.205882	7.9445
THC_GSE189821_Female_Amy	PRDM8	0.137572	0.166136	771	34	7	0.881113	TRUE	0.205882	7.9445
THC_GSE273695_Brain_Male_LPS	TLK1	0.143592	0.172674	771	33	7	0.855198	FALSE	0.212121	8.18524
THC_GSE116813_vehicle	THBD	0.147878	0.177081	133	46	6	0.20564	FALSE	0.130435	29.1772
THC_GSE273695_Brain_Male_LPS	CNTN4	0.151207	0.18031	771	35	7	0.907028	TRUE	0.2	7.71751
THC_GSE213734_vehicle	IER2	0.164676	0.195553	45	27	5	0.040839	TRUE	0.185185	122.432
THC_GSE189821_Female_Amy	DRD1	0.177455	0.209853	771	39	7	1.01069	FALSE	0.179487	6.92597
THC_GSE273695_Brain_Male_LPS	KPNA1	0.189129	0.222735	771	39	7	1.01069	FALSE	0.179487	6.92597
THC_GSE273695_Brain_Male_LPS	REV3L	0.196931	0.230969	771	40	7	1.0366	TRUE	0.175	6.75282
THC_GSE189821_Female_Amy	CAMKK2	0.208007	0.242959	771	38	7	0.984774	TRUE	0.184211	7.10823
THC_GSE273695_Brain_Male_LPS	CSMD3	0.218777	0.254495	771	42	7	1.08843	TRUE	0.166667	6.43126
THC_GSE189821_Female_Amy	TANC1	0.226158	0.262012	771	40	7	1.0366	FALSE	0.175	6.75282
THC_GSE273695_Brain_Male_LPS	PPP1R9A	0.227373	0.262354	771	37	7	0.958859	FALSE	0.189189	7.30035
THC_GSE189821_Female_Amy	MEF2C	0.232922	0.267673	771	37	7	0.958859	TRUE	0.189189	7.30035
THC_GSE273695_Brain_Male_LPS	UBE3A	0.235905	0.269053	771	40	7	1.0366	TRUE	0.175	6.75282
THC_GSE189821_Female_Amy	ATP2B2	0.236011	0.269053	771	43	7	1.11435	FALSE	0.162791	6.28169
THC_GSE189821_Female_Amy	ESRRB	0.237957	0.270191	771	41	7	1.06252	TRUE	0.170732	6.58812
THC_GSE273695_Brain_Male_LPS	CACNB4	0.26272	0.296904	771	42	7	1.08843	FALSE	0.166667	6.43126
THC_GSE116813_vehicle	CFH	0.263568	0.296904	133	58	6	0.259285	TRUE	0.103448	23.1405
THC_GSE189821_Female_Amy	RAPGEF4	0.285424	0.320259	771	64	8	1.65857	FALSE	0.125	4.82344
THC_GSE273695_Brain_Male_LPS	ATP2B1	0.287441	0.321257	771	39	7	1.01069	FALSE	0.179487	6.92597
THC_GSE189821_Female_Amy	PLCH2	0.295113	0.328543	771	42	7	1.08843	TRUE	0.166667	6.43126
THC_GSE189821_Female_Amy	CSMD3	0.298495	0.331015	771	42	7	1.08843	FALSE	0.166667	6.43126
THC_GSE189821_Female_Amy	MMT00042654	0.308455	0.340736	771	41	7	1.06252	FALSE	0.170732	6.58812
THC_GSE116813_vehicle	BMP5	0.319645	0.351733	133	15	5	0.0670566	TRUE	0.333333	74.5639
THC_GSE189821_Female_Amy	AK082001	0.322174	0.353152	771	43	7	1.11435	FALSE	0.162791	6.28169
THC_GSE116813_vehicle	DAB2	0.358559	0.39153	133	15	5	0.0670566	TRUE	0.333333	74.5639
THC_GSE273695_Brain_Male_LPS	RORA	0.407514	0.443288	771	52	7	1.34758	FALSE	0.134615	5.19448
THC_GSE189821_Female_Amy	SCN5A	0.425349	0.460929	771	52	7	1.34758	FALSE	0.134615	5.19448
THC_GSE273695_Brain_Male_LPS	ZFAND5	0.43748	0.47228	771	48	7	1.24392	FALSE	0.145833	5.62735
THC_GSE273695_Brain_Male_LPS	GABRB2	0.473105	0.508811	771	48	7	1.24392	FALSE	0.145833	5.62735
THC_GSE189821_Female_Amy	ADCY9	0.479603	0.51386	771	14	6	0.362811	FALSE	0.428571	16.5375
THC_GSE189821_Female_Amy	PNCK	0.530136	0.565875	771	14	6	0.362811	TRUE	0.428571	16.5375
THC_GSE273695_Brain_Male_LPS	GATAD2B	0.567428	0.603422	771	53	7	1.3735	TRUE	0.132075	5.09647
THC_GSE189821_Female_Amy	NM_030176	0.653669	0.692549	771	17	6	0.440557	FALSE	0.352941	13.6191
THC_GSE189821_Female_Amy	LINGO1	0.672613	0.709981	771	16	6	0.414642	TRUE	0.375	14.4703
THC_GSE189821_Female_Amy	RHCG	0.67687	0.710333	771	18	6	0.466472	TRUE	0.333333	12.8625
THC_GSE189821_Female_Amy	RAB40B	0.677932	0.710333	771	18	6	0.466472	TRUE	0.333333	12.8625
THC_GSE189821_Female_Amy	MKX	0.772608	0.806569	771	17	6	0.440557	FALSE	0.352941	13.6191
THC_GSE189821_Female_Amy	DGKZ	0.790285	0.822012	771	17	6	0.440557	TRUE	0.352941	13.6191
THC_GSE189821_Female_Amy	NKX2-1	0.797107	0.82445	771	20	6	0.518302	FALSE	0.3	11.5763
THC_GSE189821_Female_Amy	CPLX1	0.798415	0.82445	771	17	6	0.440557	TRUE	0.352941	13.6191
THC_GSE189821_Female_Amy	NECAB3	0.810381	0.833785	771	18	6	0.466472	TRUE	0.333333	12.8625
THC_GSE189821_Female_Amy	LOC728392	0.817561	0.834163	771	19	6	0.492387	TRUE	0.315789	12.1855
THC_GSE116813_vehicle	GPR182	0.818682	0.834163	133	24	5	0.107291	FALSE	0.208333	46.6024
THC_GSE116813_vehicle	AEBP1	0.819529	0.834163	133	25	5	0.111761	TRUE	0.2	44.7383
THC_GSE189821_Female_Amy	OVOL2	0.83261	0.844462	771	18	6	0.466472	TRUE	0.333333	12.8625
THC_GSE273695_Brain_Male_LPS	FYTTD1	0.837303	0.846211	771	53	7	1.3735	FALSE	0.132075	5.09647
THC_GSE189821_Female_Amy	MMT00045394	0.974608	0.981496	771	18	6	0.466472	FALSE	0.333333	12.8625
THC_GSE189821_Female_Amy	STT3B	0.992539	0.996034	771	21	6	0.544217	FALSE	0.285714	11.025
THC_GSE189821_Female_Amy	PCDH20	0.99915	0.99915	771	21	6	0.544217	FALSE	0.285714	11.025
