# Supplementary material for: Comparative analysis of 105 datasets across species and tissues reveals higher variability in transcriptomic responses to THC than CBD
Source: Research Square preprint supplement (doi:10.21203/rs.3.rs-6857614/v1), 2025-06-13
Supplement: Supplementary file 15 [file dfa1ee3ccebac51242ae5a68.xlsx]

## Sheet: genes_up
Name	Score
MT1G	3.87059e-16
MT1H	6.30566e-14
MT1M	4.42413e-13
MT2A	1.51413e-11
MT1F	3.64881e-10
MT1E	2.52812e-09
SLC3A2	7.03642e-09
GDF15	1.50037e-08
HMOX1	3.81737e-08
DDIT3	5.27148e-08
PLIN2	1.23063e-07
TMEM265	2.97484e-07
MMP1	6.25792e-07
ATP6V0D2	7.89903e-07
BHLHA15	1.0506e-06
ADM2	1.97499e-06
MT1A	2.02918e-06
TRIB3	3.69228e-06
CHAC1	3.78422e-06
ATF3	4.53287e-06
MT1X	4.74465e-06
SQSTM1	5.24478e-06
IL21R	6.28038e-06
HSPA6	1.75936e-05
TM6SF1	1.86165e-05
OLAH	1.99088e-05
SLC30A2	2.0396e-05
LIPG	2.28216e-05
ST6GALNAC3	2.29664e-05
CALCA	2.8639e-05
SPINK1	4.47527e-05
IGFBP1	4.93542e-05
RUBCNL	5.95152e-05
LAMP3	6.13217e-05
IFIT2	6.88865e-05
ZSCAN10	6.94081e-05
S100P	8.78211e-05
NUPR1	9.20203e-05
ABCB1	9.37723e-05
KRT79	0.00010013
MERTK	0.000107609
MMP10	0.000108256
TM4SF19	0.000114867
SLAMF7	0.000116535
MT1L	0.000117866
CCRL2	0.000122149
LURAP1L	0.000132805
ZP4	0.000134712
BEX2	0.00014791
CRYAB	0.000150892
ATG9B	0.000221042
KPNA7	0.000221801
RPS9	0.000228102
OASL	0.000228705
BPIFC	0.000239757
CDH15	0.000253788
SDK2	0.000265695
SUN3	0.000302826
KCNK12	0.000312122
VGF	0.00031483
KRT75	0.000318845
TMPRSS13	0.000320405
TMEM45B	0.000342984
XRCC6P1	0.000368465
IFNA1	0.000369686
CCN3	0.00038075
RET	0.000391505
GDNF	0.000403538
SLC7A11	0.000460464
TMEM71	0.000477181
SCNN1B	0.000508389
PTGIR	0.000508711
FABP3	0.00051013
PTPRR	0.000510648
MSMO1	0.000512285
RUNDC3B	0.00052205
CHRM4	0.000525023
TSLP	0.000532461
SPX	0.000547448
ARMH1	0.000558188
CCNP	0.000572535
TAC1	0.000602816
LCN2	0.000612394
ANKFN1	0.000620055
ZSCAN12P1	0.000665992
ITGB3	0.000686981
INSIG1	0.000708901
TMIE	0.000719806
NHLRC4	0.000720194
SUSD4	0.000729346
RPLP0P2	0.000751868
FCMR	0.000752341
CAMK1G	0.000768727
MCEMP1	0.000819726
H2BU1	0.000842896
WIPI1	0.000881208
NIBAN1	0.000894843
SYTL2	0.000917127
MAMDC2	0.000931532
BHLHE41	0.000938098
COL2A1	0.00095047
OLIG1	0.00095148
CHST1	0.000980687
SLC22A31	0.00102111
SDR16C5	0.00102683
BPI	0.00104964
IFNA14	0.00110906
HNRNPL	0.00114051
GTPBP2	0.00118512
SLCO4C1	0.00119914
PKD2L1	0.0012012
ULBP1	0.00122469
DERL3	0.00123267
CMKLR2	0.00123745
AMZ1	0.001254
OVOL1	0.00127953
RDH12	0.0012951
VWF	0.0013252
SPOCD1	0.00133931
KIAA1755	0.00133934
IGFN1	0.00134987
ERFL	0.00137283
CACNA1S	0.00140025
CCL26	0.00143977
IL36B	0.00149443
WDR38	0.00150834
IL12A	0.00151098
ANKRD30BL	0.00153323
HSD17B14	0.001535
KLK4	0.00153751
TBC1D26	0.00157434
ALOXE3	0.0015795
SH2D5	0.00158267
BEST1	0.00159579
NR1D1	0.00164205
HSPA5P1	0.00164742
PNLDC1	0.00165022
RNF223	0.00166434
PLD5P1	0.00166971
FPGT-TNNI3K	0.00168011
DUSP15	0.00168429
ASNSP1	0.00170653
VASN	0.0017673
CALY	0.00183655
HBA1	0.0018561
FFAR2	0.00186263
ACOX2	0.00186306
ARL13A	0.00192484
DHCR7	0.00192972
ZNF165	0.00198913
SLC6A9	0.00200441
NEURL3	0.00200462
IFITM10	0.00207128
CCDC73	0.00213856
IFNA2	0.00221811
UBE2F-SCLY	0.0022189
FGF21	0.00224551
ALPL	0.00225394
H1-4	0.00227936
TRIM39	0.00228311
GPNMB	0.0022866
ANG	0.00230486
SMTNL2	0.00232525
NWD2	0.0023727
CALCB	0.00247192
GRM8	0.00250912
FBXO32	0.00257441
AQP9	0.00257465
MANF	0.00266788
SCIN	0.00277653
PAMR1	0.0027946
BIRC3	0.00283218
SPNS2	0.00286569
CNOT6LP1	0.00294257
COL4A2	0.00304128
CD300C	0.0030641
KCP	0.00311072
RANBP3L	0.00311642
EFL1P1	0.00315011
ANO2	0.00315657
DPEP1	0.00326036
IFNA13	0.00332717
TMEM238L	0.0033678
IL1A	0.00346524
FLRT1	0.00348829
HSPB8	0.00352052
OR8G3P	0.00361486
HCAR3	0.00372025
GPRC5D	0.00372613
IL1RN	0.00377091
DCST2	0.00378072
MTND1P23	0.00378215
HOXD1	0.00379505
ARL14EPL	0.00385025
BEND3P2	0.0038707
IFNA8	0.00406654
MUC16	0.00407962
RNA5-8SP6	0.00409364
SMIM34	0.00410397
FGF19	0.00416943
TRPM8	0.00419167
RAPGEF3	0.00420133
GUCY2F	0.00426212
CLGN	0.00426289
PNPLA1	0.00430644
ASNS	0.00432427
CD300H	0.00435695
REXO1L1P	0.00436499
SYT5	0.00440928
FUT3	0.00441594
BTBD17	0.00441919
SDCBP2	0.00443763
MTUS2	0.00444732
INHBE	0.00445061
CD163L1	0.00447177
C7orf57	0.00447737
SLITRK4	0.00454857
CD300A	0.00457183
RPSAP52	0.00462175
PRPH	0.00462191
DMGDH	0.00465913
IL36RN	0.0046953
HID1	0.00470573
RPS10P7	0.00470719
H2AC18	0.00471004
TNFRSF6B	0.00471281
JCAD	0.00477612
MFSD6L	0.00479015
CEACAM21	0.00480591
SPRY4	0.00490851
PSD2	0.00495519
NRTN	0.00498058
PTGFR	0.00501219
AGAP11	0.00501343
ATAT1	0.00501825
PCDH12	0.00503074
USP17L2	0.00503795
SPATA22	0.00505051
LRATD2	0.00508977
DCSTAMP	0.00509885
ITGAD	0.00512343
DDTL	0.0051756
KRT6A	0.00522986
HS3ST2	0.00523171
GPR3	0.00524437
TATDN2P3	0.00524635
NCF2	0.00525035
CHI3L1	0.00530075
CCL3	0.00532777
JAKMIP2	0.00540292
MELTF	0.00544305
RND3	0.00545389
ASPG	0.00546302
HKDC1	0.00550016
TRIM54	0.00555767
SAMD13	0.00558529
C22orf15	0.00558919
FOSB	0.00558971
H3C4	0.00559647
HEY1	0.00567932
MLC1	0.00568182
SGK1	0.00569079
FGF7P6	0.00570255
ZSCAN5B	0.00582709
GADD45B	0.00584263
PARM1	0.00584955
SEC22B4P	0.00591497
HDAC9	0.00592376
CYP17A1	0.00598802
HMGCS1	0.00602085
EPHB1	0.00602249
HMGB1P20	0.00603334
PRSS22	0.00604398
UNC93A	0.00605496
MVK	0.00609131
HERPUD1	0.00609777
GPER1	0.00612869
MOGAT1	0.00613593
TRIM55	0.00614471
KCNIP4	0.00615876
MOV10L1	0.00618557
SIGLEC22P	0.00628466
CHRNA9	0.00630815
ITIH3	0.00637842
TM4SF19-DYNLT2B	0.00638176
FAM27B	0.00649934
KCNH3	0.00651571
RFPL2	0.00652855
CTH	0.00653047
MAGEA11	0.00661496
SIX4	0.00662176
SIGLEC12	0.00665434
TTC39B	0.00667947
CDC42EP1	0.00669288
GCKR	0.00674388
ITGAM	0.00675645
OCLN	0.00678024
TMEM125	0.00684307
PDIA2	0.00691563
H4C5	0.00692673
H2BC15	0.00697486
IFNL1	0.00702403
TEX19	0.00712137
ETV4	0.00716819
IFNB1	0.00719781
CYP1A1	0.00722925
FAM25A	0.00725265
SGCG	0.00729261
METRNL	0.00729522
ANKRD18EP	0.00736377
ZBTB20	0.00736617
GPR84	0.00739372
H2AZ2P1	0.00742291
TENM4	0.00745226
NT5DC4	0.00747409
NKAIN4	0.00752737
ALK	0.00757576
ABLIM3	0.00763192
OSGIN1	0.00763665
REPS2	0.00772926
KCNJ1	0.00777093
SIGLEC9	0.00780672
PIP5K1B	0.0078455
CXCL1	0.00795287
RAI2	0.00797113
NSG2	0.00798358
CD300E	0.00799259
GLP1R	0.00804059
ARL11	0.00804544
NECTIN4	0.00805704
MAP1LC3B2	0.00812144
MAGEA9	0.00824742
SPDYA	0.00828536
CPEB1	0.00840311
KIF19	0.00843244
UPP1	0.00847365
SHBG	0.00853887
SLAMF9	0.00858476
ZNF705A	0.00860778
B3GNT8	0.00864971
CLDN14	0.00883838
GABARAPL1	0.00884915
TMPRSS2	0.00895333
KCNK10	0.00895636
OPCML	0.00898204
SLC8A2	0.00907368
TNFRSF9	0.0090981
HSPA7	0.00911368
GOLGA6B	0.00913108
CRLF1	0.00914914
KLHL38	0.00924851
ASS1P3	0.00947805
RASGEF1A	0.0095453
TAL1	0.00958029
GPM6A	0.00973054
ORM1	0.00974191
CLU	0.0098675
TGM2	0.00993288
XKRX	0.0099782
LAIR2	0.00998152
POU4F3	0.0100147
ANKRD33	0.0100365
SAMD11	0.0101225
ESRP1	0.0101435
KCNJ4	0.0102405
TPSB2	0.0102643
PDCD6-AHRR	0.0103093
OR8G5	0.0103459
DDIT4L	0.0103712
PPP1R15A	0.010531
FNDC1	0.0106337
ZNF841	0.0107424
RGS1	0.0107674
CEBPB	0.0108287
PCDH7	0.0108533
SPHK1	0.0108956
CASP5	0.0109681
RAB20	0.0109928
RHCG	0.0110185
IL2RB	0.0110968
TMEM163	0.0111783
COL4A1	0.0111784
MDGA1	0.0112448
BMS1P11	0.0112571
LY9	0.0113131
PDLIM3	0.0113179
CREBRF	0.0113459
TMEM233	0.0113888
C15orf48	0.0114017
TCF20	0.0114155
PABPC1L	0.0114502
FRMD1	0.0114589
PLEKHA4	0.0114733
IRAK2	0.0115988
SH3RF3	0.0117343
CDKN1C	0.0118437
SLC49A3	0.0118599
STARD4	0.0118653
DUSP10	0.0119976
IFI27L2	0.0120408
GVINP2	0.0120894
RGCC	0.0120943
NAT8	0.0121099
SCART1	0.0121195
RPGRIP1	0.0121256
NKD1	0.0121692
KCNH2	0.0121852
LCE3A	0.0123175
CFAP107	0.0123503
KCNA10	0.0124344
RND1	0.0124717
NGFR	0.0125188
BNIP3P1	0.0125456
DACH2	0.0125757
NCKAP1L	0.0125769
ZNF460	0.0125813
LRP2	0.0126812
FAM167A	0.0126966
LCN10	0.0127246
KRTAP4-2	0.0127737
PLA2G4C	0.0128594
FTH1	0.0129012
FMR1NB	0.0129602
OR10S1	0.0130018
CCDC7	0.0130415
KDELR3	0.0130589
ZSWIM2	0.0130988
SLC50A1	0.0131715
TACR1	0.0132299
DGKD	0.0132353
SYT4	0.0132548
CLEC2B	0.0132903
ATF4	0.0133192
CST1	0.0133203
FA2H	0.0133828
ARRDC4	0.0133918
C11orf96	0.0134702
GADD45A	0.0134886
SSTR5	0.0135072
GRAMD1C	0.013575
CFAP47	0.0136157
NCAM1	0.0136384
ADRA1A	0.0136817
IL32	0.0137941
DEGS2	0.013815
AP3B2	0.0138469
NUTM2F	0.0138473
CTSD	0.0138861
AKR1C1	0.013918
TVP23C	0.013979
SYNGR3	0.0140159
AOAH	0.0140252
CRYM-AS1	0.0140901
MT1B	0.0141135
CCR2	0.0141423
STX16-NPEPL1	0.0141925
AGXT	0.0141953
DISP3	0.0143797
S1PR1	0.0144104
GUSBP15	0.014433
NYX	0.0144388
HSH2D	0.0144928
CACNG1	0.0144993
SHC2	0.0145033
TMPRSS9	0.0145069
HYOU1	0.0145323
DEPP1	0.0145777
TRIM63	0.0145985
PCDH1	0.0149012
COX6A2	0.0149045
IGDCC4	0.0149803
GPR179	0.0150132
LIMS4	0.0150221
WFDC21P	0.0150704
DNAI1	0.0150922
NRIP3	0.0151195
BCAT1	0.0151622
CHMP4BP1	0.0152904
WNT11	0.0153835
RHEBL1	0.0154182
KLHL21	0.0154511
ARHGAP8	0.0154701
PPFIBP2	0.0155008
TTC9B	0.015512
GSDMB	0.0156783
SLC5A1	0.0157391
CCL7	0.0157441
SLC22A15	0.0157489
FDFT1	0.0157889
ABCC11	0.0157981
SOWAHD	0.0158965
H4C12	0.0159057
LCE3D	0.0159672
SLC16A6	0.0161981
MMP3	0.0163805
SLC28A3	0.0164163
HSPB2-C11orf52	0.0164234
CDH3	0.0164671
ZFAND2A	0.0164955
GRHL1	0.0165022
CCL20	0.0166498
TMC1	0.0166515
PHF24	0.016734
NOS1	0.0167676
H2AC13	0.0167894
TMEM198	0.016838
NPY1R	0.0168796
SEMA6C	0.0169471
SEC14L5	0.0170839
FOXO6	0.0171077
ASMT	0.0171078
CYP4B1	0.0171468
ATP13A4	0.017153
ACVRL1	0.017187
GRIK4	0.0172248
ERICH2	0.0172376
DENND11	0.0172414
FAM90A12P	0.0173281
FAM83E	0.0173358
IDI1	0.0174902
ATP6V1FNB	0.0175178
LDLR	0.0175603
SPRR2D	0.0175639
ANGPTL6	0.0175781
SPEGNB	0.0175898
CEP70	0.0175936
F5	0.0176991
NPHS1	0.0177423
ANKRD36C	0.0177685
SV2B	0.017792
RBP7	0.0178308
HPGD	0.0178357
IL20RB	0.0178928
SERPINE1	0.0179032
PRG4	0.0179535
DNAJC19P5	0.0179641
PLIN5	0.0179676
SPANXN5	0.0180201
KDM7A	0.0180646
BAMBI	0.0180987
DRC1	0.0183383
SLCO5A1	0.0183564
ZBTB7C	0.0183797
TMEM178A	0.0183927
PTGER2	0.0184087
AGR2	0.0184384
CLDN4	0.0184703
OLR1	0.0185977
MAL	0.0188946
GABBR2	0.0189043
MB	0.0189325
CPHXL	0.0189394
ARHGAP20	0.0189734
SQLE	0.0189931
STARD13	0.0190088
ABCB4	0.0190604
IL2RG	0.0190789
FOXA1	0.0191606
HBEGF	0.019398
CEBPE	0.0194288
CXCL8	0.0195191
SSX1	0.0195707
EIF4A1P10	0.0195933
CCDC187	0.0196168
HTRA4	0.019632
PCARE	0.0197123
DLL4	0.0197864
SLC51B	0.0197993
STON1-GTF2A1L	0.0198353
SMIM38	0.0198435
CCNA1	0.0199739
NLRC4	0.0199767
MYZAP	0.0200098
SCN8A	0.0200279
MT1XP1	0.020073
RPL10P19	0.020074
BMS1P10	0.0201507
RADX	0.0202247
ARHGAP30	0.0202379
TNFSF14	0.020278
DCDC2C	0.0202787
NBPF4	0.0203011
TKTL1	0.0203327
INSYN2A	0.0204061
PHYHD1	0.0204937
NHS	0.0205087
ZSCAN5C	0.0205177
CHST8	0.0205729
MARCO	0.0205985
CCL4	0.0206195
RASGEF1B	0.0206416
PRSS33	0.0207094
MCOLN3	0.0207646
YPEL4	0.0207969
MAP3K12	0.0208562
KIF5A	0.0209595
SYT14P1	0.0209854
CABP1	0.0209996
ISLR2	0.0211032
TPRG1	0.0211109
STXBP5L	0.021149
BMS1P3	0.0211662
MYCT1	0.0214071
SPRR2F	0.0214416
SMIM10L2B	0.0215153
MYO15A	0.0215204
ADAM32	0.0217066
ADAMTS17	0.0217739
HSPA5	0.0218987
ISX	0.022096
CELF6	0.0221196
CLEC3B	0.0221259
LCE3E	0.022354
CEMIP	0.0223589
EFHD1	0.022364
MAFF	0.0223655
IFI6	0.0223761
FAM90A27P	0.0224116
PTPRVP	0.022594
RORC	0.0226259
DOK7	0.0226804
ZNF365	0.0226946
CIDEA	0.0228102
LRRC9	0.0229205
LILRA1	0.0229347
ADH7	0.0229521
LAPTM5	0.0230359
ERICH3	0.0230383
GZMM	0.0232664
COX6B2	0.0232695
CIDEB	0.0232902
ZNF462	0.0233056
BMS1P8	0.023342
SOHLH1	0.0233586
RBPMS2	0.0233713
NBPF21P	0.0234945
SEPTIN3	0.0235269
CSNK2B	0.0235778
SLC2A14	0.0237226
H4C14	0.0237299
EFNB2	0.0237394
RNASE4	0.023815
CRELD2	0.023881
TMEM231	0.0238879
WDR64	0.0239507
POU3F1	0.0241106
H4C8	0.0241395
AVPR1B	0.0242057
CASKIN1	0.0242198
TCEAL7	0.0243056
FTH1P5	0.0244069
CRTAC1	0.0244386
MS4A14	0.0246003
GLRA3	0.0246212
IL36A	0.024635
RAB15	0.0246856
KCNE1	0.0248074
ACP7	0.0248631
CRYM	0.0249671
SLC6A19	0.0251514
FGF14	0.0251537
FAM86KP	0.0253193
NBEAP6	0.0254491
NCS1	0.0255137
ANKRD53	0.0257127
CELSR1	0.0257549
C20orf203	0.0257755
RRN3P1	0.0257886
ABCA4	0.0260036
ERO1B	0.0260221
SLC24A4	0.0262681
CNTFR	0.0262717
CYGB	0.0263046
NRG4	0.0264036
INHBA	0.0265322
FETUB	0.0265487
IL13RA2	0.026749
URGCP-MRPS24	0.0268041
ANXA10	0.0268406
MXD1	0.0270288
FBXO16	0.0270813
HLA-K	0.0271465
PLEKHF1	0.0272317
ANGPTL4	0.0272935
GLS2	0.0273204
ACSS2	0.0273355
CES1	0.0273567
P2RX7	0.027473
PAPSS2	0.0276003
CLDN23	0.0276407
CYB5R1	0.0276547
C5AR1	0.0278106
SLC30A1	0.0278429
DLX2	0.0279774
ADCY10	0.0280854
SOAT2	0.0281786
FUT2	0.0281813
ADGRB1	0.0282021
FRG2C	0.0282281
SBSN	0.0282465
S100A7A	0.0282847
SEC24D	0.0284108
PROC	0.0284431
SERPINB8	0.0284581
MYT1	0.0285128
ITGAX	0.02874
NMRK2	0.0287693
ITGB7	0.0287912
PIK3AP1	0.0288977
CITED1	0.0290204
SLC25A27	0.0290265
PLEKHG1	0.0291969
AMN	0.0294518
KLF18	0.0296717
NAALADL2	0.0296804
SNORC	0.0297573
CYRIA	0.029952
CACNA1E	0.0300706
CLIC6	0.0301078
ZNF701	0.0301245
SPDYE21	0.0301845
CLEC1B	0.0303142
KPRP	0.0303376
TMEM251	0.0304259
FOXO1B	0.0305207
ASCL5	0.0305657
SYT9	0.0305909
UBBP2	0.0306187
CYSRT1	0.0307278
SSPO	0.0307406
SNTB1	0.0308247
LCE1F	0.0310219
PDGFRL	0.0310837
CPEB4	0.0311741
TLX3	0.03125
USP17L15	0.03125
ZC3H14	0.0312558
ABLIM2	0.0313642
HOXC13	0.0314371
OR6M1	0.0314781
CAPN8	0.031495
TMEM225B	0.0315995
LY75	0.0316721
RBM46	0.0317062
NTRK1	0.0317762
ADAD2	0.031793
DCST1	0.0319343
IGFBP3	0.0319649
CTSL	0.0321612
ZFP36	0.032291
SLC9B1	0.0323424
FAR2	0.0324263
C1orf54	0.0325026
VCX	0.0325126
KL	0.0325337
CFAP157	0.0326036
GMFG	0.0327396
ZBP1	0.0329578
SCG5	0.0329897
SAMD4A	0.0330287
CNFN	0.0330748
NEDD9	0.033089
RGPD5	0.0331945
OR7E91P	0.0333029
HK2	0.0333154
TMPRSS4	0.0333452
DGKZP1	0.0334596
VPS9D1	0.0334774
TVP23C-CDRT4	0.0334834
STRC	0.0334897
NIM1K	0.0335352
THBS4	0.0336077
GALNT12	0.0338095
EPHA10	0.0340472
CLXN	0.0340569
YPEL3	0.0340735
CRCT1	0.0342153
CPAMD8	0.0342343
GDF6	0.0343085
CFB	0.0343384
TAF7L	0.03451
SLC4A7	0.0345121
ARG2	0.0346104
PLAC8	0.0346334
PTGS1	0.0346414
FUT1	0.0347058
RPL6P4	0.0348996
ATP2B2	0.0349357
SERPINC1	0.034952
FIBIN	0.0349678
EVA1CP2	0.0349855
ACTN2	0.0350776
PANX2	0.0350851
PRKAG3	0.0351201
LSMEM2	0.0351277
ERN1	0.0351909
SLC6A16	0.0351966
TRPV2	0.0353032
FAM90A28P	0.0353535
USP26	0.0353558
ANKRD1	0.0354503
GCLM	0.0354853
RHOB	0.0354893
TWF1P1	0.0354898
DNAJB9	0.0355706
DKK4	0.0355839
RTN4RL2	0.0356213
SCNN1G	0.0356566
FBN1	0.035864
KLHL2P1	0.0359848
COL8A2	0.0360498
BEAN1	0.0361438
PITX3	0.0363331
KCNJ5	0.0363743
SH3GL3	0.0364304
CR2	0.0366126
INSL3	0.0366766
MAOB	0.0368152
CAMP	0.0369526
KLF4	0.0370407
RPL29P19	0.0370509
APOL1	0.0372039
SLC25A48	0.0372176
CYP4F11	0.0373133
OLIG2	0.0373383
DACT1	0.037392
STRCP1	0.0374088
NPC1	0.0374353
DEFB4B	0.0376369
AKNA	0.0377403
FAP	0.0378215
FIGNL2	0.0378263
PRDM6	0.037865
ZNF486	0.0380101
EDNRB	0.0380499
ILDR1	0.038089
IL23A	0.0381037
TNFRSF10B	0.0381557
CSN3	0.0381928
PRR20G	0.0381944
ELAVL3	0.0385299
VPREB3	0.0385571
CA7	0.0386586
CDC42P2	0.0387774
EPB41L1	0.0388076
HNRNPR	0.0388128
ADCY6	0.038933
MLKL	0.0390939
CA4	0.039128
PLEKHG6	0.0391816
RNF152	0.0392182
CRYGFP	0.0392336
PROM1	0.0392657
SLC30A3	0.0393157
SLC43A1	0.0393676
CYP4F27P	0.0393931
RPL39P40	0.0394075
POR	0.0395547
GGT2P	0.0395564
HES7	0.0395889
OTUD1	0.0395985
LSMEM1	0.039615
GMPR	0.03963
PDE3B	0.0398222
CPE	0.0400559
ADAMTSL5	0.0402149
HNRNPA1P27	0.0402459
BOLL	0.040404
SCUBE2	0.0404901
TMEM184A	0.0405189
DROSHA	0.0405616
ISM2	0.040634
MSTO2P	0.0406569
ALPP	0.0407133
ODAD4	0.0408472
RYR3	0.0408477
ZNF521	0.0410229
THAP10	0.0410351
SPRR2A	0.0410584
MATN3	0.0410917
PBX1	0.0410959
NOG	0.0411135
TNFAIP3	0.041326
SNED1	0.0414532
KCNQ4	0.041522
TMEM140	0.0417915
VEGFA	0.0418889
ERFE	0.0420437
TUBA1C	0.0421217
SIK1	0.0421739
CSF2RB	0.0422248
DUTP6	0.0422904
ZNF423	0.042298
BEX4	0.0423257
GUCY1A2	0.0423601
ERAP2	0.0424058
CYP39A1	0.042427
SEMA3G	0.0424315
NFILZ	0.0424818
MRAS	0.042571
TMEM252	0.0426212
FCGR1BP	0.0426537
MUCL1	0.0426551
IFI16	0.0427991
LILRB4	0.0429576
ITGA3	0.0430528
FUT6	0.0431113
TRIML2	0.0432236
SERHL2	0.0432449
TRIM16L	0.0433725
LRCH3	0.043379
TMOD1	0.0434007
WIPF3	0.0435342
MDFI	0.043718
IL6	0.0438699
MIS12	0.043923
GPR156	0.0439737
MUC21	0.0440237
PTPRH	0.0440282
ROBO4	0.0441012
PLEKHG3	0.0441163
NCEH1	0.0441572
GOLGA6C	0.0441587
GPD1	0.0442153
ATP2C2	0.0442518
SDR9C7	0.0444799
C3	0.0445059
SRP14P2	0.0445076
SLC2A3	0.0445086
C2CD4A	0.0447177
SLC45A3	0.0447261
MUSK	0.0448232
CLEC4E	0.0448737
METRN	0.0449759
RPSAP50	0.0451017
HCN1	0.0451793
GPR157	0.0452131
RHOF	0.045219
HRK	0.0452951
GPR45	0.0454545
RALGPS1	0.0454665
ACTR3C	0.0455562
UPK2	0.0456042
GPR37L1	0.0456554
MAB21L2	0.045686
NCR3LG1	0.0457368
HSP90B2P	0.0457421
CLEC19A	0.045841
MAFB	0.0460072
SLC34A3	0.0460766
ADCY4	0.0461109
OTOP2	0.0461151
GATA3	0.0463054
VTI1BP2	0.0463506
KCNC2	0.0463946
IL34	0.0464072
SPATA4	0.0464346
RASSF2	0.046539
SLC39A12	0.0465804
CELF2	0.0466846
CRTAM	0.046759
PARD3B	0.0468336
ISM1	0.0468986
FABP4	0.0470462
CATSPER2	0.0471014
PLA2G4D	0.0472172
VCY	0.0473485
SYT15	0.0474227
DNAH3	0.0475082
THEG	0.0475126
SPRR2E	0.0476734
TNC	0.0476895
HK3	0.0478236
CAPN6	0.0479042
HSPA1A	0.0481211
MAGEB17	0.0481296
CDKN2B	0.0482659
RPS26P47	0.0482955
C15orf62	0.0483577
MARF1	0.0484115
TSPYL2	0.0485322
SMCO2	0.0485858
XPOTP1	0.0486111
IL1R1	0.0486183
CLDN9	0.0488139
TMEM253	0.04891
FAM81A	0.048913
NEXMIF	0.049042
COL27A1	0.0491116
SH2B3	0.0491521
RAB3C	0.04919
RPS26P58	0.0492424
KRT78	0.0494
NIBAN3	0.0494469
FCGR1A	0.0494587
CHRNA3	0.0496205
CYP51A1	0.0496702
HHIPL1	0.049681
SOX8	0.0496944
TMCC3	0.0496965
UCP1	0.0497263
MS4A7	0.0498232
CUX2	0.0498737
SGPP2	0.0498959
ALX3	0.049922

## Sheet: Down DEG
Name	Score
GPR171	2.88924e-06
NXPH4	6.87908e-06
CCNI2	7.1737e-06
SLC39A10	1.7271e-05
ANGPT1	1.81072e-05
COL9A3	1.83346e-05
GRIP1	2.54712e-05
SLC16A3	3.30331e-05
S100B	3.89502e-05
CABP7	3.98115e-05
ZNF488	4.82415e-05
SUSD2	4.91644e-05
POM121L9P	9.83753e-05
GRM7	0.000102721
IRF6	0.000164336
CADM3	0.000169246
TYRP1	0.000196295
PFDN6	0.000220653
RGS4	0.000222547
CBLN2	0.000235739
STC1	0.000235885
OLFML3	0.000260799
THRSP	0.000270416
ALAS1	0.000277998
LOX	0.000280586
TLCD2	0.000291375
RSPO1	0.000299653
APCDD1	0.000303443
TM4SF4	0.000336858
ITGA8	0.00034267
PAPPA2	0.00034626
IGFBP5	0.000365338
ACSM2B	0.00037092
POM121L1P	0.000374312
COL3A1	0.000418431
PFKFB4	0.00052304
ARSF	0.000532716
FOXS1	0.000560852
SERPINF2	0.000582751
DCANP1	0.000600962
IGF2	0.00060445
TNNT2	0.000644478
IFIT1	0.000647176
HTR5A	0.00074184
EXTL1	0.000744041
PRL	0.000779086
ODAPH	0.000817661
KLF5	0.000822368
CDH4	0.000849618
CNN2P4	0.000882613
CCN4	0.000935195
POM121L7P	0.00095512
APLN	0.00101417
MLLT6	0.00104749
CDX1	0.00110327
EDN2	0.00111405
OOSP4A	0.0011655
TNFRSF11B	0.00117835
HMSD	0.00125366
KCNA3	0.00125583
CFH	0.00126314
CHRM3	0.00127443
ARHGEF39	0.00129069
PIF1	0.00132565
RTL9	0.0013483
NEUROG2	0.00135169
OSCAR	0.00140213
BUB1B	0.00142839
GOLGA6L22	0.00145688
THPO	0.00148368
GJA5	0.00154457
ADAMTSL2	0.00156358
PTGER3	0.00159764
HSPB7	0.00162872
TUBAL3	0.00167154
VCAM1	0.00176523
E2F8	0.00183242
SPON2	0.00199123
PACSIN1	0.00200828
MYO7B	0.00201178
OR5B1P	0.00203963
SPDYE2B	0.00209497
NES	0.00216536
ABCC12	0.00224341
BRME1	0.00238419
GPR20	0.00240385
KCNS2	0.00242718
REM2	0.00243375
PCDHA2	0.00244413
MARVELD2	0.00250731
PPFIA4	0.00258119
OAS2	0.0025887
COL5A3	0.00261879
CRYBA2	0.00262238
LY75-CD302	0.00264696
MAPK4	0.00264784
CPA5	0.00265105
EPAS1	0.00276828
KBTBD11	0.00279232
LRIG3	0.00283573
PLXNA4	0.00284009
WNT5A	0.00285928
FGF20	0.00291375
RFLNA	0.00295611
RARRES1	0.00296736
KLF2	0.003
CAVIN2	0.00300211
HLA-DOB	0.00300543
JPH2	0.00303589
NEGR1	0.00305367
CCDC80	0.00315026
DBIL5P	0.00319012
SELL	0.00327065
TAGLN	0.00335378
LRRC26	0.00336511
ACTBL2	0.00336881
PRRT2	0.00338556
ST6GAL2	0.00340509
ANKRD20A5P	0.00343892
CXCL10	0.00349498
EGFL6	0.0034965
AMIGO3	0.00360577
CPN1	0.00364554
CSMD3	0.00365616
KCNN1	0.00370196
FAM107A	0.0037092
NOXO1	0.00376097
EFS	0.00378788
LDB3	0.00380333
ASB2	0.00382328
SLC29A2	0.00390128
IGFBP4	0.0039063
ADAM19	0.00391569
FAM72C	0.00397
COL1A2	0.00397483
CD207	0.00399864
TRPC5OS	0.00407925
NKD2	0.00408831
ADGRF3	0.00411184
COMMD3-BMI1	0.00418994
JUN	0.00424169
LRFN2	0.00424809
SYTL5	0.00429103
ITIH4	0.00434437
CABP5	0.00437063
PPP1R1B	0.00437645
MYH15	0.00437688
MXD3	0.0043776
FLRT2	0.00437818
CHRNA4	0.00444856
PCDH18	0.0044843
MGAM	0.00449379
RRN3P3	0.00453911
SFRP2	0.00463372
ERCC6L	0.00464691
IL21	0.004662
RAB44	0.0046729
DEPDC1	0.00471736
TRIM10	0.00480769
PTPRQ	0.00481663
TMEM26	0.00488827
TRPV6	0.00502334
TINAG	0.00504767
ARHGAP11A	0.00508357
CCL23	0.00517093
USP53	0.00521869
TUBAP7	0.00524476
ADM	0.00526625
IZUMO4	0.00526814
SIGLEC1	0.00530711
TRIM15	0.00540865
GRIN1	0.00546716
LAD1	0.00549859
RXFP3	0.00551633
OR5B2	0.00553613
MMP11	0.00554017
DYSF	0.0055638
NANOGP6	0.00558659
DNAI4	0.00563698
LILRA6	0.00572363
PDE4B	0.00573327
RTL3	0.00573698
MTTP	0.00576172
IGSF10	0.00577781
SULT1A3	0.00579593
TG	0.00581137
NDUFB4P11	0.00582751
ARHGAP33	0.00582894
KRT222	0.00584497
TMEM239	0.00588895
BRS3	0.00593575
DNAH8	0.00600138
SSC5D	0.00603739
SLITRK6	0.00606063
KRTAP5-5	0.00611888
KIAA1614	0.00620035
COL6A3	0.00620985
PROKR1	0.00624726
CBS	0.00627775
GGNBP2	0.00630564
ACKR3	0.00636423
CACNA2D4	0.00637213
PDE1C	0.00640835
PRSS41	0.00641026
LINC01085	0.00642872
AXIN2	0.00646579
CDK1	0.00648131
SYCE1L	0.00653594
CHODL	0.00653798
ABHD12B	0.00657895
NPM1P25	0.00661058
FGF10	0.00661185
NUF2	0.00662533
ANGPTL2	0.00663572
FAM111B	0.00663923
TIFAB	0.00668664
POM121L4P	0.00670163
MTHFD2P1	0.00679196
NXPH3	0.00679621
MYB	0.00683438
ASB4	0.00694518
BNIP5	0.00699301
EEF1A1P45	0.00699725
CLEC2L	0.00704748
ZNF962P	0.0070609
HRC	0.00707413
VWA3B	0.00710405
EFHB	0.00712978
KIF18B	0.00716631
SMAD6	0.00722726
RAD54L	0.00727754
KCNK2	0.00728155
IQCB2P	0.00728438
LDLRAD2	0.0073324
UNC79	0.00735895
DIPK2A	0.00737782
C1QA	0.00747886
CX3CR1	0.00747886
GUCY1A1	0.00749363
HLF	0.00755963
MYL3	0.00757151
SLC17A2	0.00757576
FGF1	0.00758845
LMNB1	0.00760141
ZNF320	0.00768156
MACROH2A2	0.00785193
POSTN	0.00785393
CCL27	0.00785893
FBXO36P1	0.00786713
PRODH2	0.00787034
H1-9P	0.00794351
TACSTD2	0.0079632
MROH3P	0.00806953
NEB	0.00815023
ACTL6B	0.00815851
CCL16	0.00816417
SPC24	0.00825145
RHOT1P1	0.00835771
FLT3	0.00836838
FERP1	0.00837989
ANO9	0.00839089
CDH6	0.00840919
PYCR3	0.00843548
FBLN7	0.00847411
NOL4	0.00848715
COL6A5	0.00852345
ABCA12	0.00856229
PTGER4	0.00857169
SLC24A5	0.00860547
DBH	0.00860596
POM121L15P	0.0086246
INTS3	0.00872296
AOC4P	0.00874126
MMP25	0.00875733
DGKK	0.00880565
ADAMTS12	0.00881639
SCARA5	0.00882613
SMTN	0.00896592
PRR15L	0.00897364
CLIC3	0.00900109
TGFA	0.009009
CYP24A1	0.00901644
NCLP1	0.00903263
DMPK	0.00903867
ARC	0.00904905
C4orf54	0.00907821
TTK	0.00916354
ABCA9	0.00930679
TSGA10IP	0.00931314
SPAG6	0.00932401
GRPR	0.00934579
PKD1L1	0.00942737
PDGFRB	0.00948808
PPP1R1C	0.00961137
NXF3	0.00961538
SEC24AP1	0.00961538
TAFA3	0.00964392
HMMR	0.00968004
ADAM12	0.00969625
DIRAS3	0.0096991
EGR4	0.00973499
SLC14A1	0.00974042
IGF1	0.0097999
TEX14	0.00982619
MUC22	0.00990676
TMEM35A	0.00992939
SLC26A10	0.00993339
PER2	0.00994412
HSPB6	0.0100265
MPEG1	0.010125
FLG	0.0101257
OR10Y1P	0.01015
FBLN2	0.0101876
RFPL3	0.0101981
SLC12A3	0.0102126
FAM131A	0.0103623
ESCO2	0.0103627
CCNB1IP1	0.0106202
KDM3A	0.0106788
LRRC66	0.0107369
CLDN11	0.0107388
MCHR1	0.0107567
VSNL1	0.010759
JPH4	0.0107809
HP	0.0108308
DOK3	0.0108391
RIPOR3	0.0108676
TMSB15B	0.0108714
SMPDL3B	0.0109274
H3C3	0.0109366
HMGN2P40	0.0110723
RAB30	0.0110979
IGHM	0.0111169
VIL1	0.0111664
EPHB6	0.0112013
ARRDC3	0.0112151
DLG5	0.011217
GPR183	0.0112433
SHISA3	0.0112829
PDE10A	0.0113006
FHIP1A	0.0113159
NPAP1P3	0.0113636
NEURL1B	0.0113698
SKA3	0.0113789
RTL1	0.0114482
LUM	0.0114575
PLET1	0.0114698
EXOC3L1	0.011474
COX4I2	0.0114985
DNAH7	0.0115223
CYP7B1	0.0115734
MCF2	0.0116211
ERVH48-1	0.011655
OTX1	0.0116837
VWA1	0.0117441
C9orf152	0.0117779
FOLR2	0.0118343
FGFBP2	0.0118694
CHTF18	0.0119974
LORICRIN	0.0120829
ABCA6	0.0121048
SHC3	0.01219
SPDYE6	0.0122207
SLC35F3	0.012287
TMEM150B	0.0123195
SLC38A11	0.0123197
STPG4	0.0123388
CLEC4F	0.0123956
HES1	0.0124332
STK19	0.012456
RGS13	0.0124758
SLCO1C1	0.0125291
SPARC	0.0125503
COL13A1	0.0125772
GTF2IRD2P1	0.0126113
CCL15-CCL14	0.0126202
CCND1	0.0126334
SGCD	0.0126581
ALOX15B	0.0128
CTRC	0.012919
ADAMTSL1	0.0129346
SOWAHA	0.0129545
ASPM	0.0130151
KRT18P17	0.0131119
ITGB6	0.0131131
ANKRD2	0.0131228
AIRE	0.0131446
ANO7	0.0131691
CHST4	0.01318
PDK1	0.0132016
PCDHB8	0.0132682
CMKLR1	0.0133301
SLC6A5	0.0133531
IFITM1	0.0134029
CTRB2	0.0134033
ABCD2	0.0135379
VIPR2	0.0135611
SVOPL	0.0135939
CLEC18B	0.013724
KIF2C	0.0137628
MAMDC4	0.0138162
QPRT	0.0138221
CXCL11	0.013986
RRM2	0.0139878
MYH7B	0.0140187
COL24A1	0.0140838
DHX16	0.014095
COL18A1	0.0141024
CHRDL1	0.0141218
OSM	0.0141573
GPR68	0.0141759
GATA6	0.0142081
FRMPD1	0.0142203
FLOT1	0.0142602
MGAT4FP	0.0142774
RLN1	0.0143017
PRSS3	0.0144231
SPTBN5	0.0144659
DEPTOR	0.0145445
COL10A1	0.0145631
H2BC3	0.0145688
SEMA3A	0.0146596
SCNN1D	0.0146828
MOCOS	0.0147705
AOC3	0.0147768
FRMPD4	0.0148626
MFRP	0.0148683
SOX18	0.01492
CCNYL2	0.0150044
RHOH	0.015014
NDRG2	0.0150164
SP110	0.0150396
CYP4Z1	0.0150439
ST8SIA1	0.0150885
MEIS1	0.0150967
PLXNC1	0.0150998
CREB3L1	0.0151991
GFRA1	0.0152164
TMEFF1	0.0154234
CEACAM22P	0.0154429
TCAF2P1	0.0154618
PEAR1	0.0155184
TNS2	0.0155523
ZBED2	0.0156126
CA9	0.015673
LTB	0.0157068
HHIP	0.0158555
SIX5	0.0158745
TYR	0.015887
KLRG2	0.0159671
OCA2	0.015972
RPL7P19	0.0160256
KLRA1P	0.0160615
CKAP2L	0.0160667
CACNA1A	0.0161427
ADIRF	0.016317
PLP1	0.0163283
TRIL	0.0163688
CD1E	0.0164694
CENPE	0.0165454
RPL12P30	0.0166084
PXDNL	0.016636
ILDR2	0.0167154
KREMEN2	0.0167622
SLC38A3	0.0168514
ARL10	0.0168515
NF1P4	0.0168998
UBASH3A	0.016904
KCNMB4	0.0169109
PDE4C	0.0169555
CTBP2P10	0.0170629
CACNA2D3	0.0170827
LRRC71	0.017106
CACNG7	0.0171089
ANTXR1	0.0171094
P2RY11	0.017145
ADCYAP1	0.0173067
CDON	0.0174172
PDE3A	0.0174302
RASSF10	0.0174315
ZNF682	0.0174581
DNAJC8P1	0.0174825
PCDHGB1	0.0175885
CNGB1	0.0176129
FGL2	0.0177204
COL25A1	0.0177544
YTHDF2P1	0.0177739
UHRF1	0.0177765
CD248	0.0178374
CDC42P6	0.0178729
SKIDA1	0.0179353
CD200R1	0.0180203
DUSP2	0.0180359
TGIF2-RAB5IF	0.0180653
JAML	0.0181558
H2BC13	0.0182277
RDH8	0.0183142
KNL1	0.0183367
PTP4A3	0.0183447
FEV	0.0183566
FCGBP	0.0185056
RPS3AP20	0.018648
SCARA3	0.0187136
UBE2FP1	0.0189169
GOLGA6L6	0.0189394
GAPDHP44	0.0192308
METTL27	0.0192308
HABP2	0.0193768
MXRA5Y	0.0194175
ADAMTS5	0.0194272
B3GALT4	0.0195757
SLC8A3	0.0196406
PKIB	0.0196947
SPESP1	0.0197644
POM121L8P	0.0198135
B3GNT6	0.0198317
PTCHD1	0.019952
KMO	0.019966
GUCY2C	0.0201049
TEF	0.0201573
ATOH8	0.0202514
SGK2	0.0203389
H3-5	0.0203963
HSF2BP	0.0204259
CYP4F2	0.0204327
GIMAP4	0.0204415
PLCH2	0.0204453
MEMO1P1	0.0204764
PALMD	0.0205694
DDX58	0.0206047
G6PC1	0.0206876
PFN1P2	0.0207176
NID1	0.0207219
CXCR3	0.0208181
JUND	0.0208346
WDR76	0.0208914
PPL	0.0208939
STOX2	0.0209497
THY1	0.0209553
MGAT4C	0.020962
KIF23	0.0209919
C1S	0.0210157
ZNF608	0.0211069
SCHIP1	0.0211827
ICAM4	0.0213123
OR6Y1	0.0213816
COL6A1	0.0214034
MPO	0.0214286
SLC26A9	0.0214485
GLIS2	0.021475
ADORA3	0.0215193
PKLR	0.0215618
NODAL	0.0216653
UBE2QL1	0.02173
F13A1	0.0219852
VTCN1	0.022006
OLFML2B	0.022022
WEE1P2	0.0221445
KISS1R	0.0221537
SLC6A17	0.0222039
DUOXA2	0.0222356
DUSP8	0.0223809
IQCG	0.0224075
RNF14P3	0.0224359
LOXL2	0.0224466
OR2C1	0.0225066
LRRC32	0.0225289
DAP3P1	0.0227273
PES1P2	0.0228365
TRO	0.0228813
KMT5C	0.022975
MAPK6P4	0.0230186
PDZD3	0.0230447
LMCD1	0.023068
NPAS4	0.0232558
BRWD1P2	0.02331
GRM2	0.023368
HSFX4	0.0234016
TUBB2B	0.0234028
CPNE4	0.0235414
TRAF3IP2	0.0237389
ENDOU	0.0237508
FSCN1P1	0.0238195
VN1R12P	0.0238928
CENPF	0.0239193
SELENOP	0.0239662
FUT7	0.0239772
BAAT	0.0240055
LIG1	0.0240309
KLRC4	0.0240512
ITGBL1	0.0240527
TAS2R14	0.0240922
ADAMTS16	0.0241098
TM4SF1	0.0242374
CXCL12	0.0242718
SALL4P1	0.0244755
BAALC	0.0246369
PAK5	0.0246394
LRRC58-DT	0.0246552
ZNF385D	0.0247132
LCNL1	0.0247669
RADIL	0.0248061
TMEM121	0.0249333
SLAMF8	0.0249338
ATP6V1B1	0.0250211
FGF7	0.0252226
SLC44A2	0.0252375
EPSTI1	0.0252676
FABP7	0.0253751
TMSB4Y	0.0254295
PDE7B	0.0254685
OCSTAMP	0.0254885
SPAAR	0.0254888
TMEM100	0.0255139
LKAAEAR1	0.0255188
OAS1	0.0255264
ZBTB9	0.025597
BOC	0.0256262
H1-1	0.025641
DPY19L2P2	0.0256738
XRCC2	0.0257357
KIF14	0.0258186
SLC16A9	0.0259268
RAB25	0.0259324
NMU	0.0260796
CD101	0.0261224
LCN6	0.0262238
CHRNA10	0.0262263
IFNK	0.0262577
LRIG1	0.0263366
PRRT1	0.0263381
SGIP1	0.0264125
PRODH	0.0264755
PPIAP22	0.0265152
GPX2	0.0266835
SNAI1P1	0.0267062
KCNA6	0.0267447
CFAP299	0.0268065
ANLN	0.0268145
EHBP1L1	0.026966
SLC2A1	0.0270108
GKN2	0.0270322
LINC01529	0.0270379
CXorf49B	0.0270979
PLOD2	0.0271057
CA11	0.0271267
RESP18	0.0271878
VAT1L	0.0271933
TEDC2	0.0273507
GRIN3B	0.0273817
SELP	0.0273893
PRSS35	0.0274402
SOX2	0.0274462
MYLK4	0.0274481
EFEMP1	0.0275621
GAL3ST1	0.0275769
MLANA	0.0275816
COL5A1	0.0276358
NXPH1	0.0276624
IL20	0.0278713
SLC35D3	0.0278821
DPF3	0.0278952
GEN1	0.0279488
TIPINP1	0.0279983
ADAMTS4	0.0280973
FBXO15	0.0282821
DHRS2	0.0283174
CNTN5	0.0283231
GCHFR	0.0283526
SPTA1	0.0284643
PTPRK	0.0284694
TSPAN2	0.0285432
FAT1	0.0286037
TP53INP1	0.0286798
ACTL8	0.0287021
FGF8	0.0288462
GPR27	0.0288849
ACKR1	0.028923
DSCAML1	0.0289456
MEX3A	0.0289833
PDGFRA	0.0290405
COL11A2	0.0291375
XAF1	0.0291584
CD164L2	0.029252
ATAD5	0.0292751
LFNG	0.0292928
PPEF1	0.0293469
PRR22	0.0294454
AEBP1	0.0294561
SLC18A1	0.0296736
NECAB1	0.0297203
CCDC89	0.0297839
CLSPN	0.029834
PDCD1LG2	0.0298752
ANK1	0.0298838
CD1D	0.0299379
DACT2	0.0299526
HGFAC	0.0300445
ALOX5	0.0301614
GPR17	0.0302295
SULT2B1	0.030286
PLEK2	0.0303551
RCOR2	0.0303768
CLDN1	0.0303941
CEP295NL	0.0304154
SYNPO2	0.0305056
CSDC2	0.0305665
SLC13A1	0.0305944
CDT1	0.030994
BMP5	0.0311045
SYT1	0.0311279
EPHA4	0.0311542
TUBA3E	0.0311772
GBP1	0.0311776
LAG3	0.0311835
SCN2A	0.0313327
OPTC	0.0313901
LINC00993	0.0314077
HPDL	0.031434
KIF20A	0.0314508
CCDC81	0.0315671
OTOP3	0.0317599
GBP1P1	0.0317741
TSPOAP1	0.0317814
GPBAR1	0.031851
FGF12	0.0318607
SLC7A5P1	0.0318888
SERPINF1	0.0320166
PRKN	0.0320724
MEF2C	0.0320919
HRCT1	0.0321229
CLSTN2	0.0321689
DDR1	0.032249
SERPINA6	0.0323427
CCDC85C	0.0324079
RPS15AP1	0.032436
FOXE3	0.0324519
BEND5	0.0324771
MKI67	0.0325191
UGT1A9	0.0325749
ADH1C	0.032634
BNC2	0.0327202
HRNR	0.0328212
CNR1	0.0328301
PKNOX2	0.0328773
TUFMP1	0.0329254
KRTAP1-5	0.0333333
CYP1B1	0.0333692
CXCL9	0.0334308
CYP2B7P	0.0335082
ST3GAL6	0.0335599
WNT9B	0.0336538
MS4A3	0.0336567
CCDC198	0.0336914
CHAF1A	0.033882
GALR3	0.0339847
RIN2	0.0340741
SMPD4P1	0.0340909
TUBBP1	0.0342012
IL9R	0.034212
ATP6V1G1P2	0.0343823
ACAP3	0.0346325
PRRX1	0.0346425
GJB3	0.034655
SELE	0.0346737
NKX3-2	0.0347729
SYT11	0.0347892
C9orf24	0.0348558
ASCL1	0.0349091
LY6G5B	0.0349162
LRRTM2	0.0349209
HPN	0.034965
MXRA5	0.0350838
MOB3B	0.0350899
LRRIQ4	0.0352564
STAB1	0.0352783
TSNAXIP1	0.0354498
STAB2	0.0354567
TRIB1	0.0355407
FER1L6	0.0355478
TEK	0.0355556
MYCBP	0.035713
PSD4	0.0357136
SEMA3E	0.0358153
METTL24	0.0358392
SCN5A	0.0358952
LONRF2	0.0359197
FAM131C2P	0.0359382
PTN	0.0359665
SCN7A	0.0359979
ITGA2B	0.0360859
CD72	0.0361088
OR7E115P	0.0361305
SLC12A1	0.0361842
DOK6	0.0362426
RNF182	0.0362536
RAG2	0.0363501
SRSF3P4	0.036356
ATP2B4	0.0363804
RBBP8NL	0.0364219
KRT86	0.0365394
NR2F1	0.0365972
ZDHHC14	0.0366054
TNFAIP8L1	0.0366741
PBK	0.0366961
CEACAM20	0.0367133
ENPP5	0.0367739
MACROD1	0.0367948
GCNT2	0.036824
ADGRG5	0.0368367
ID1	0.0368794
SLC39A4	0.0369584
BNIP3	0.0369935
RPF2P1	0.0370047
ITGA11	0.0370833
ATP8A1	0.0371484
MMACHC	0.037203
LRRC70	0.0372199
HEY2	0.0372904
STAT1	0.0373105
FGA	0.0373603
PRICKLE2	0.0374696
RD3	0.0375796
GPC5	0.0376097
TNFSF13	0.037637
NHSL2	0.037655
HNRNPKP3	0.0378338
PTMAP5	0.0378788
NPDC1	0.0379644
MALL	0.037997
CLC	0.0380276
CENPM	0.0382326
FBN2	0.0383857
WFIKKN2	0.0384615
ASGR2	0.0385432
STMN3	0.0385692
DNAAF8	0.0385757
KCND1	0.0385934
CCBE1	0.0387139
SRSF6P2	0.0387529
RNF17	0.0388634
IL1R2	0.0388915
DRG1P1	0.0390443
WSCD1	0.0390552
PAH	0.0391061
CD1A	0.0391953
ATP2A1	0.0392597
OTC	0.0393175
LEP	0.0393357
EHF	0.0394304
UBE3D	0.0394589
CD200	0.0399383
ECE1	0.0399454
IGLVIVOR22-1	0.040117
CST7	0.0402298
ANKRD37	0.0403568
HPSE	0.0403587
FOLR1	0.0403634
TCIRG1	0.0403803
ACSM1	0.0405349
FBXL19	0.0406805
FSTL1	0.0407619
TM4SF5	0.0407816
RPL36AP54	0.0407925
ZFP91-CNTF	0.0408012
DKK2	0.0408163
CNIH2	0.0409427
TIMP3	0.0410364
TEKT1	0.0410839
FAM83D	0.0412709
LEXM	0.0413707
OOSP3	0.0413753
ACBD7	0.0415113
H2BC14	0.0416667
KCTD4	0.0417034
GSK3A	0.0417136
PER1	0.041738
DOC2GP	0.0417733
LIPC	0.0417835
LIN7A	0.0419042
ADCY8	0.0419139
HSPA8P18	0.041958
KIF18A	0.0421036
PSAPL1	0.0421109
EFHC2	0.0422802
SLC6A7	0.0423654
MBNL3	0.0424331
MAMSTR	0.0424809
DDN	0.0425279
TRIM22	0.0425454
PSG5	0.0425875
CHMP4A	0.0426276
HMX3	0.0426558
C5	0.0426971
SLC38A4	0.0428067
SYN3	0.0428571
IL27	0.0429057
ADGRD1	0.0430422
ISYNA1	0.0430478
HDC	0.0431235
CDC7	0.0431411
HMGB1P1	0.04315
CAMK4	0.043224
SAMD9L	0.0432813
BATF2	0.0433361
TNFRSF8	0.0433566
NANOS3	0.0433976
TMPRSS11B	0.0434149
FGFBP1	0.0434565
SCG2	0.0434687
TMEM132D	0.0436893
GARIN4	0.0437063
H2AC17	0.0437465
ALDH1L1	0.0439361
LTK	0.0443381
KCNQ1	0.0444431
ZNF395	0.0444565
TMEM37	0.044457
IL15	0.0445067
C18orf54	0.0445626
COMP	0.0446049
KIAA0895L	0.0447196
TOMM20P3	0.0448718
CTTNBP2	0.044917
NOTCH4	0.0450297
INSM1	0.0450772
ANKDD1B	0.0450951
ZNF503	0.0451578
SPACA4	0.0451632
RTP4	0.0452339
LGR5	0.0453911
FSD1	0.0454247
LPA	0.0454545
DOK2	0.0455814
CLDN6	0.0457459
IL11	0.0457917
H2AC12	0.0459137
METTL7A	0.0459403
MGAT3	0.0459899
HK2P1	0.0459941
MMRN2	0.0460373
CTSE	0.0460894
APOBEC3D	0.0462232
CRYBB3	0.046274
AMOTL2	0.0462821
CATSPERE	0.046365
NT5E	0.0465663
FAM124B	0.04662
RIIAD1	0.0467359
FNDC7	0.0467759
SULF1	0.0468032
CDH26	0.0468312
IL13	0.0469114
DZIP1	0.0469901
FASN	0.0470324
NCKAP5	0.0472483
ASPRV1	0.0473506
CD4	0.0474083
SLC5A11	0.047486
MLLT10P1	0.0474942
NTRK2	0.0475037
CCL24	0.0476353
UGT1A7	0.0476725
NTM	0.0477116
BRIP1	0.0477649
SOX30	0.0478132
POU2AF1	0.0478352
CD7	0.0478965
COL5A2	0.0479574
CGN	0.0480633
RSPH6A	0.0480769
LDB2	0.0481024
ZCCHC18	0.0481239
ADH6	0.0481844
AGBL1	0.0482196
FOXH1	0.048244
RPS3AP5	0.0483683
KPNA2P3	0.0483793
H2BC6	0.0484455
NEIL3	0.0485332
C20orf204	0.0485509
SCML4	0.0485905
EPHB3	0.0485917
NPY2R	0.0486776
SAPCD2	0.0487132
BTBD16	0.0489489
DMBT1	0.0491473
ENG	0.0492297
C4A	0.0492424
SFTPD	0.0492788
RNF225	0.0495338
PARP9	0.0496417
OR2I1P	0.0497284
SIGLEC11	0.0498072
SYNDIG1	0.0498676
LILRB2	0.0498774
TMEM30BP1	0.0499032

## Sheet: Up pathways
Term	Overlap	P.value	Adjusted.P.value	Odds.Ratio	Combined.Score	Genes
Mineral absorption Homo sapiens hsa04978	14/51	1.35209e-07	2.18813e-05	7.23844	114.486	SLC6A19;MT1M;MT1X;SLC30A1;SLC5A1;MT2A;MT1A;FTH1;MT1F;MT1G;HMOX1;MT1H;MT1B;MT1E
Cytokine-cytokine receptor interaction Homo sapiens hsa04060	35/265	1.72975e-07	2.18813e-05	2.94386	45.8362	CNTFR;TNFRSF6B;CXCL8;IFNA1;IFNA2;IL20RB;CSF2RB;CXCL1;IL2RG;IFNA8;IFNL1;CCL7;CCL4;IL21R;CCL3;IL12A;CCR2;NGFR;IFNA13;IFNA14;TSLP;TNFSF14;IL1R1;CCL20;IFNB1;TNFRSF9;TNFRSF10B;INHBA;VEGFA;INHBE;IL1A;IL6;IL23A;IL2RB;CCL26
Transcriptional misregulation in cancer Homo sapiens hsa05202	25/180	3.92694e-06	0.000331172	3.10072	38.5967	CEBPB;SLC45A3;CXCL8;ITGAM;HPGD;CEBPE;TMPRSS2;SIX4;ITGB7;PROM1;FCGR1A;SSX1;NTRK1;NGFR;IGFBP3;MMP3;ETV4;PBX1;CCNA1;IL6;TLX3;DDIT3;IL2RB;NUPR1;BIRC3
Tuberculosis Homo sapiens hsa05152	21/178	0.00024684	0.0156126	2.5607	21.2712	IFNA13;CEBPB;IFNA14;ITGAM;IFNA1;IFNB1;SPHK1;IFNA2;IFNA8;C3;IL1A;IL6;IL23A;IRAK2;ITGAX;IL12A;CLEC4E;FCGR1A;ATP6V0D2;CTSD;CAMP
Steroid biosynthesis Homo sapiens hsa00100	6/20	0.000334588	0.0169302	8.14286	65.1641	SQLE;SOAT2;CYP51A1;MSMO1;DHCR7;FDFT1
Measles Homo sapiens hsa05162	17/136	0.000477104	0.0199939	2.72932	20.8733	IFNA13;IFNA14;IFNA1;IFNB1;HSPA6;IFNA2;TNFRSF10B;TNFAIP3;TACR1;IL2RG;IFNA8;IL1A;IL6;CSNK2B;IL2RB;IL12A;HSPA1A
Complement and coagulation cascades Homo sapiens hsa04610	12/79	0.000553191	0.0199939	3.41399	25.6042	C3;CR2;ITGAM;PROC;VWF;SERPINC1;SERPINE1;C5AR1;ITGAX;CLU;CFB;F5
Jak-STAT signaling pathway Homo sapiens hsa04630	18/158	0.00100434	0.0317623	2.45614	16.9558	CNTFR;IFNA13;IFNA14;TSLP;IFNA1;IFNB1;IFNA2;IL20RB;CSF2RB;IL2RG;IFNA8;IL6;IFNL1;IL23A;IL2RB;IL21R;IL12A;IL13RA2
Legionellosis Homo sapiens hsa05134	9/55	0.00155753	0.0394056	3.7223	24.0634	C3;IL6;CXCL8;ITGAM;HSPA6;CXCL1;IL12A;NLRC4;HSPA1A
Rheumatoid arthritis Homo sapiens hsa05323	12/90	0.0017867	0.041094	2.93082	18.5445	IL1A;IL6;CXCL8;CTSL;MMP1;IL23A;CCL20;MMP3;CCL3;CXCL1;ATP6V0D2;VEGFA
negative regulation of growth (GO:0045926)	10/14	8.18001e-11	1.22782e-07	47.7161	1108.29	MT2A;MT1A;MT1L;MT1M;MT1F;MT1G;MT1X;MT1H;MT1B;MT1E
cellular response to zinc ion (GO:0071294)	10/15	2.34317e-10	1.75855e-07	38.1709	846.414	MT2A;MT1A;MT1L;MT1M;MT1F;MT1G;MT1X;MT1H;MT1B;MT1E
PERK-mediated unfolded protein response (GO:0036499)	8/12	1.63457e-08	8.17829e-06	38.0963	683.04	IGFBP1;CXCL8;HSPA5;DDIT3;ASNS;ATF3;HERPUD1;ATF4
response to endoplasmic reticulum stress (GO:0034976)	13/61	8.34926e-06	0.00313306	5.17286	60.488	PPP1R15A;PDIA2;CEBPB;CXCL8;TNFRSF10B;THBS4;HERPUD1;ERN1;DDIT3;AGR2;TRIB3;HYOU1;ATF4
inflammatory response (GO:0006954)	26/209	1.90369e-05	0.00571489	2.73007	29.6735	ORM1;CEBPB;TNFRSF6B;CXCL8;IFNA2;C5AR1;LY75;CXCL1;AOAH;NLRC4;HDAC9;CCL7;CCRL2;CCL4;CCL3;NGFR;CCL20;TNFRSF9;PLA2G4C;TNFRSF10B;TACR1;CYP4F11;IL1A;IL6;CHI3L1;CCL26
cholesterol biosynthetic process (GO:0006695)	9/33	2.54673e-05	0.00637106	7.1427	75.5563	IDI1;SQLE;MVK;HMGCS1;CYP51A1;MSMO1;DHCR7;FDFT1;CES1
intrinsic apoptotic signaling pathway in response to endoplasmic reticulum stress (GO:0070059)	7/22	6.94488e-05	0.0148918	8.87508	84.9782	PPP1R15A;CEBPB;DDIT3;TNFRSF10B;TRIB3;CHAC1;ATF4
positive regulation of transcription from RNA polymerase II promoter in response to endoplasmic reticulum stress (GO:1990440)	5/11	0.00011366	0.020287	15.8242	143.72	CEBPB;HSPA5;DDIT3;ATF3;ATF4
negative regulation of smooth muscle cell proliferation (GO:0048662)	6/17	0.000121641	0.020287	10.3653	93.4371	PTGIR;IGFBP3;TNFAIP3;HMOX1;ANG;IL12A
positive regulation of branching involved in ureteric bud morphogenesis (GO:0090190)	5/12	0.000186786	0.025243	13.5629	116.445	GDNF;SIX4;NOG;SOX8;VEGFA
positive regulation of gene expression (GO:0010628)	24/214	0.000201809	0.025243	2.42137	20.6015	MUSK;CITED1;NOG;INHBA;POU3F1;KLF4;CLU;VEGFA;DLL4;P2RX7;IL1A;IL6;CUX2;CDH3;NAT8;RGCC;WNT11;ADM2;LAMP3;GPER1;AGR2;CCL3;ATF4;HSPA1A
cellular response to tumor necrosis factor (GO:0071356)	12/74	0.000298361	0.0344492	3.69028	29.9548	DCSTAMP;ZFP36;CXCL8;CCL7;CCL20;GPER1;CCL4;ANKRD1;CCL3;CHI3L1;GATA3;CCL26
glucose transport (GO:0015758)	7/28	0.000370125	0.0396827	6.33734	50.0756	HK3;SLC2A14;SLC45A3;SLC2A3;SLC5A1;SLC50A1;HK2
negative regulation of osteoclast differentiation (GO:0045671)	5/14	0.000433971	0.0420869	10.5478	81.6665	MAFB;TMEM178A;CCL3;LILRB4;FBN1
response to exogenous dsRNA (GO:0043330)	6/21	0.000448628	0.0420869	7.5996	58.5877	IFNA14;IFNA1;IFNB1;IFNA2;SLC3A2;IFNA8

## Sheet: Down pathways
Term	Overlap	P.value	Adjusted.P.value	Odds.Ratio	Combined.Score	Genes
Protein digestion and absorption Homo sapiens hsa04974	17/90	1.89437e-06	0.000471698	4.49832	59.2727	COL18A1;COL13A1;COL24A1;COL11A2;SLC8A3;COL3A1;COL1A2;COL5A1;KCNQ1;COL5A3;COL6A1;COL5A2;COL10A1;COL6A3;COL9A3;COL6A5;PRSS3
Cytokine-cytokine receptor interaction Homo sapiens hsa04060	30/265	2.47571e-05	0.00308226	2.47768	26.2792	IL21;CX3CR1;CXCL9;IL20;FLT3;TNFRSF11B;PRL;THPO;CXCR3;TNFRSF8;CCL16;PDGFRB;IL11;CCL24;PDGFRA;CCL23;IL15;IL1R2;TNFSF13;IL13;OSM;CXCL10;CXCL11;CXCL12;LEP;IFNK;ACKR3;LTB;CCL27;IL9R
extracellular matrix organization (GO:0030198)	27/142	1.68097e-09	2.44413e-06	4.57173	92.3667	FBN2;DDR1;COL18A1;SPARC;COL13A1;ITGA2B;ICAM4;NID1;COMP;COL10A1;ITGB6;FGA;VCAM1;LUM;ADAM19;COL3A1;COL1A2;LOX;COL5A1;COL5A3;ADAM12;COL5A2;ITGA11;COL6A1;ITGA8;COL6A3;COL9A3
collagen fibril organization (GO:0030199)	10/24	9.37298e-08	6.81415e-05	13.7422	222.388	COL3A1;COL1A2;COL5A1;LUM;COL5A3;SERPINF2;COL11A2;COL5A2;CYP1B1;LOXL2
collagen catabolic process (GO:0030574)	14/56	4.35882e-07	0.000211257	6.42964	94.1678	COL18A1;COL13A1;COL25A1;COL11A2;MMP11;COL3A1;COL1A2;COL5A1;COL5A3;COL6A1;COL5A2;COL10A1;COL6A3;COL6A5
muscle organ development (GO:0007517)	12/56	1.61057e-05	0.00585442	5.24938	57.9339	CHODL;CXCL10;MEF2C;TAGLN;SMTN;SGCD;ITGA11;COL6A3;NEB;ANKRD2;AEBP1;IGF1
microtubule depolymerization (GO:0007019)	5/10	6.22444e-05	0.0159981	19.1512	185.469	KIF18A;KIF18B;KIF14;STMN3;KIF2C
sprouting angiogenesis (GO:0002040)	7/22	6.60168e-05	0.0159981	8.95057	86.1546	CCBE1;ANGPT1;SEMA3E;TEK;LOXL2;ENG;E2F8
skin development (GO:0043588)	6/17	0.000116385	0.0241748	10.4534	94.6928	COL3A1;COL5A1;COL5A3;COL5A2;DACT2;ASPRV1
skeletal system development (GO:0001501)	15/103	0.000175365	0.0318725	3.28325	28.3956	POSTN;IGFBP4;COL11A2;IGF2;TNFRSF11B;AEBP1;IGF1;BMP5;COMP;ADAMTS4;COL1A2;EXTL1;COL10A1;NKX3-2;CMKLR1
chemotaxis (GO:0006935)	12/75	0.000315468	0.0443332	3.66256	29.5255	CX3CR1;CCL24;CXCL10;CXCL9;C5;CCL23;CXCL11;CXCL12;CXCR3;CCL16;CCL27;CMKLR1
positive regulation of MAPK cascade (GO:0043410)	10/55	0.00034226	0.0443332	4.26838	34.0614	SOX2;IL11;NTRK2;CD4;FLT3;LEP;OSM;IGF2;IGF1;FGF10
outflow tract morphogenesis (GO:0003151)	7/28	0.000352586	0.0443332	6.39125	50.8118	MEF2C;SFRP2;SOX18;GJA5;NPY2R;HEY2;HES1
cell-cell signaling (GO:0007267)	28/280	0.000377881	0.0443332	2.1501	16.9448	C1QA;CXCL9;VIPR2;ADM;THY1;PCDH18;STAB1;FGF20;PCDHA2;CCL16;IL11;CCL24;FGFBP1;CCL23;IL15;IL13;WNT9B;ADCYAP1;CXCL10;CXCL11;SFRP2;FAT1;PCDHGB1;LTB;TEK;CHST4;FGF12;CCL27
positive regulation of ERK1 and ERK2 cascade (GO:0070374)	18/148	0.000419639	0.0443332	2.66924	20.7563	PDGFRB;PDGFRA;FGA;CCL24;CCL23;ANGPT1;SERPINF2;FGF1;ADCYAP1;CD4;THPO;GPR183;GCNT2;ACKR3;TEK;NODAL;CCL16;FGF10
endothelial cell migration (GO:0043542)	6/21	0.000429843	0.0443332	7.66418	59.4134	PTP4A3;STAT1;CYP1B1;PRSS3;SCG2;LOXL2
negative regulation of cell migration (GO:0030336)	12/78	0.000457358	0.0443332	3.49552	26.8807	IFITM1;SFRP2;IGFBP5;DLG5;TP53INP1;CYP1B1;STC1;PTPRK;THY1;SULF1;ALOX15B;ENG
