# Supplementary material for: Comparative analysis of 105 datasets across species and tissues reveals higher variability in transcriptomic responses to THC than CBD
Source: Research Square preprint supplement (doi:10.21203/rs.3.rs-6857614/v1), 2025-06-13
Supplement: Supplementary file 16 [file e4ac2f2e626d21506b37d19e.xlsx]

## Sheet: summary
ID	p.val	Overlap of ECS gene & DEG	Categorization	Species	Tissue	Tissue_categorization	Exposure_Route
GSE261716_CBD0.2_2d	0.00190196	14	CBD	Mus musculus	Liver	Liver	Intraperitoneal injection
GSE273695_Brain_Male_LPS	0.00526546	15	THC	Rattus norvegicus	Brain orbitofrontal cortex	Brain	Intraperitoneal injection
GSE274859_LPS_24h	0.00547357	43	CBD	Mus musculus	Brain Microglial cells	Brain	In medium
GSE201508_cGAMP	0.0193133	25	CBD	Homo sapiens	Monocyte (THP-1 cell line)	Immune	In medium
GSE151512_12h	0.0196624	22	CBD	Homo sapiens	Neuroblastoma (SK-N-BE(2) cell line)	Brain; Cancer	In medium
GSE70689_CBD_NoLPS	0.0283954	5	CBD	Mus musculus	BV-2 microglial cell line	Immune	In medium
GSE179661_MHCC97H	0.0333929	47	CBD	Homo sapiens	Liver (MHCC97H cell line)	Liver	In medium
GSE189821_Female_Amy	0.040579	12	THC	Mus musculus	Brain amygdala	Brain	Intraperitoneal injection
GSE151512_24h	0.0446728	40	CBD	Homo sapiens	Neuroblastoma (SK-N-BE(2) cell line)	Brain; Cancer	In medium
GSE151512_6h	0.0546954	15	CBD	Homo sapiens	Neuroblastoma (SK-N-BE(2) cell line)	Brain; Cancer	In medium
GSE270378_CBD1.5_6h	0.0616516	1	CBD	Mus musculus	Hypothalamus (mHypoA-2/12 (Clu177) cell line)	Brain	In medium
GSE189821_Female_DMS	0.0734649	2	THC	Mus musculus	Brain dorsolateral striatum	Brain	Intraperitoneal injection
GSE242892_16p11dup	0.079847	3	THC	Mus musculus	Brain mPFC microglia	Brain	Subcutaneous injection
GSE261716_CBD20_28d	0.0951891	15	CBD	Mus musculus	Liver	Liver	Intraperitoneal injection
GSE168797_SARS_CBDV	0.102104	16	CBD	Homo sapiens	Lung aveolar cell (A549 cells ACE2 overexpression)	Lung	In medium
GSE242892_WT	0.104919	2	THC	Mus musculus	Brain mPFC microglia	Brain	Subcutaneous injection
GSE232624_Veh_CBD0.75_6h	0.122797	1	CBD	Homo sapiens	Dermal fibroblast	Skin	In medium
GSE270378_CBD3_6h	0.123632	1	CBD	Mus musculus	Hypothalamus (mHypoA-2/12 (Clu177) cell line)	Brain	In medium
GSE168797_Mock_CBDV	0.125105	7	CBD	Homo sapiens	Lung aveolar cell (A549 cells ACE2 overexpression)	Lung	In medium
GSE261716_CBD0.2_28d	0.143965	6	CBD	Mus musculus	Liver	Liver	Intraperitoneal injection
GSE273695_Brain_Male_Saline	0.153388	1	THC	Rattus norvegicus	Brain orbitofrontal cortex	Brain	Intraperitoneal injection
GSE274435_DMSO_24h	0.158511	5	CBD	Rattus norvegicus	Brain primary hippocampal neurons	Brain	In medium
GSE168797_Mock_CBD	0.205359	47	CBD	Homo sapiens	Lung aveolar cell (A549 cells ACE2 overexpression)	Lung	In medium
GSE232624_Veh_CBD3_12h	0.248329	3	CBD	Homo sapiens	Dermal fibroblast	Skin	In medium
GSE152088	0.257478	9	CBD	Homo sapiens	Integument (HOK-16B cell line)	Skin	In medium
GSE274435_EtOH_24h	0.263991	2	CBD	Rattus norvegicus	Brain primary hippocampal neurons	Brain	In medium
GSE244644_FetalAorta	0.267985	1	THC	Macaca mulatta	Endothelial cells (Fetal Aorta)	Vasculature	in utero exposure
GSE201508_enthanol	0.310673	6	CBD	Homo sapiens	Monocyte (THP-1 cell line)	Immune	In medium
GSE168797_SARS_CBD	0.339572	44	CBD	Homo sapiens	Lung aveolar cell (A549 cells ACE2 overexpression)	Lung	In medium
GSE179661_HepG2	0.357669	41	CBD	Homo sapiens	Liver (HepG2 cell line)	Liver	In medium
GSE235310_Veh	0.360629	24	CBD	Homo sapiens	Monocyte-derived dendritic cell line	Immune	In medium
GSE131565	0.369826	58	CBD	Homo sapiens	Integument (primary human keratinocytes)	Skin	In medium
GSE272113_CBD	0.398484	23	CBD	Mus musculus	Skeletal muscle myotube (C2C12 cell line)	Muscle	In medium
GSE70689_CBD_wLPS	0.466515	2	CBD	Mus musculus	BV-2 microglial cell line	Immune	In medium
GSE151512_3h	0.546368	2	CBD	Homo sapiens	Neuroblastoma (SK-N-BE(2) cell line)	Brain; Cancer	In medium
GSE272113_sCBD	0.583267	18	CBD	Mus musculus	Skeletal muscle myotube (C2C12 cell line)	Muscle	In medium
GSE232624_Veh_CBD0.75_12h	0.585687	1	CBD	Homo sapiens	Dermal fibroblast	Skin	In medium
GSE232624_EtOH0.75_CBD0.75_12h	0.61138	1	CBD	Homo sapiens	Dermal fibroblast	Skin	In medium
GSE116813_vehicle	0.668693	1	THC	Mus musculus	Brain hippocampus	Brain	Subcutaneous injection
GSE261716_CBD10_28d	0.671956	2	CBD	Mus musculus	Liver	Liver	Intraperitoneal injection
GSE235310_LPS	0.689692	30	CBD	Homo sapiens	Monocyte-derived dendritic cell line	Immune	In medium
GSE232624_EtOH0.75_CBD0.75_6h	0.869116	1	CBD	Homo sapiens	Dermal fibroblast	Skin	In medium
GSE261716_CBD20_2d	0.912778	2	CBD	Mus musculus	Liver	Liver	Intraperitoneal injection
GSE116813_DISC1	1	0	THC	Mus musculus	Brain hippocampus	Brain	Subcutaneous injection
GSE121439	1	0	THC	Macaca mulatta	Colon tissue	Digestive	Intravenous injection
GSE150723	1	0	THC	Macaca mulatta	Oropharyngeal tissue	Digestive	Intravenous injection
GSE158188_Female	1	0	THC	Rattus norvegicus	Brain nucleus accumbens shell	Brain	Intraperitoneal injection
GSE158188_Male	1	0	THC	Rattus norvegicus	Brain nucleus accumbens shell	Brain	Intraperitoneal injection
GSE181487	1	0	THC	Macaca mulatta	Gingival tissue	Oral	Intravenous injection
GSE189821_Female_Nac	1	0	THC	Mus musculus	Brain nucleus accumbens	Brain	Intraperitoneal injection
GSE189821_Female_PFC	1	0	THC	Mus musculus	Brain prefrontal cortex	Brain	Intraperitoneal injection
GSE189821_Female_VTA	1	0	THC	Mus musculus	Brain ventral tegmental area	Brain	Intraperitoneal injection
GSE189821_Male_Amy	1	0	THC	Mus musculus	Brain amygdala	Brain	Intraperitoneal injection
GSE189821_Male_DMS	1	0	THC	Mus musculus	Brain dorsolateral striatum	Brain	Intraperitoneal injection
GSE189821_Male_Nac	1	0	THC	Mus musculus	Brain nucleus accumbens	Brain	Intraperitoneal injection
GSE189821_Male_PFC	1	0	THC	Mus musculus	Brain prefrontal cortex	Brain	Intraperitoneal injection
GSE189821_Male_VTA	1	0	THC	Mus musculus	Brain ventral tegmental area	Brain	Intraperitoneal injection
GSE198578	1	0	THC	Homo sapiens	in vitro iPSC engineered heart tissue	Heart	In medium
GSE207518	1	0	THC	Macaca mulatta	Brain basal ganglia	Brain	Intravenous injection
GSE213734_LPS	1	0	THC	Mus musculus	Brain microglia	Brain	Intraperitoneal injection
GSE213734_vehicle	1	0	THC	Mus musculus	Brain microglia	Brain	Intraperitoneal injection
GSE216112	1	0	THC	Macaca mulatta	Placenta	Placenta	Oral ingestion
GSE226955_EpiLC	1	0	THC	Mus musculus	Epiblast-like cells (EpiLCs)	Stem cell	In medium
GSE226955_ESC	1	0	THC	Mus musculus	Embryonic stem cells (ESCs)	Stem cell	In medium
GSE226955_PGCLC	1	0	THC	Mus musculus	Primordial germ cells-like cells (PGCLCs)	Stem cell	In medium
GSE232624_EtOH0.25_CBD0.75_12h	1	0	CBD	Homo sapiens	Dermal fibroblast	Skin	In medium
GSE232624_EtOH0.25_CBD0.75_6h	1	0	CBD	Homo sapiens	Dermal fibroblast	Skin	In medium
GSE232624_Veh_CBD3_6h	1	0	CBD	Homo sapiens	Dermal fibroblast	Skin	In medium
GSE235969_Female_Old_5d	1	0	THC	Mus musculus	Brain hippocampus	Brain	Intraperitoneal injection
GSE235969_Female_Old_5wk	1	0	THC	Mus musculus	Brain hippocampus	Brain	Intraperitoneal injection
GSE235969_Male_Young_5wk	1	0	THC	Mus musculus	Brain hippocampus	Brain	Intraperitoneal injection
GSE240225_THC	1	0	THC	Rattus norvegicus	Enteric glial cell (EGC/PK060399egfr cell lines)	Digestive	In medium
GSE240225_THC-COOH	1	0	THC	Rattus norvegicus	Enteric glial cell (EGC/PK060399egfr cell lines)	Digestive	In medium
GSE242079_CBD3	1	0	CBD	Rattus norvegicus	Heart	Heart	Intraperitoneal injection
GSE242079_CBD30	1	0	CBD	Rattus norvegicus	Heart	Heart	Intraperitoneal injection
GSE244644_UmbilicalArtery	1	0	THC	Macaca mulatta	Endothelial cells (Umbilical Artery)	Vasculature	in utero exposure
GSE244644_UmbilicalVein	1	0	THC	Macaca mulatta	Endothelial cells (Umbilical Vein)	Vasculature	in utero exposure
GSE261716_CBD10_2d	1	0	CBD	Mus musculus	Liver	Liver	Intraperitoneal injection
GSE262437_AsympCO	1	0	CBD	Mus musculus	Brain	Brain	Oral ingestion
GSE262437_SympCO	1	0	CBD	Mus musculus	Brain	Brain	Oral ingestion
GSE266113_mutCox15	1	0	CBD	Homo sapiens	Primary skin fibroblasts (dermal fibroblat cell line)	Skin	In medium
GSE266113_mutNdufs4	1	0	CBD	Homo sapiens	Primary skin fibroblasts (dermal fibroblat cell line)	Skin	In medium
GSE266113_WT	1	0	CBD	Homo sapiens	Primary skin fibroblasts (dermal fibroblat cell line)	Skin	In medium
GSE270378_CBD0.325_24h	1	0	CBD	Mus musculus	Hypothalamus (mHypoA-2/12 (Clu177) cell line)	Brain	In medium
GSE270378_CBD0.325_6h	1	0	CBD	Mus musculus	Hypothalamus (mHypoA-2/12 (Clu177) cell line)	Brain	In medium
GSE270378_CBD0.75_24h	1	0	CBD	Mus musculus	Hypothalamus (mHypoA-2/12 (Clu177) cell line)	Brain	In medium
GSE270378_CBD0.75_6h	1	0	CBD	Mus musculus	Hypothalamus (mHypoA-2/12 (Clu177) cell line)	Brain	In medium
GSE270378_CBD1.5_24h	1	0	CBD	Mus musculus	Hypothalamus (mHypoA-2/12 (Clu177) cell line)	Brain	In medium
GSE270378_CBD3_24h	1	0	CBD	Mus musculus	Hypothalamus (mHypoA-2/12 (Clu177) cell line)	Brain	In medium
GSE273695_Blood_Female_LPS	1	0	THC	Rattus norvegicus	Blood peripheral blood mononucelar cells	Blood	Intraperitoneal injection
GSE273695_Blood_Female_Saline	1	0	THC	Rattus norvegicus	Blood peripheral blood mononucelar cells	Blood	Intraperitoneal injection
GSE273695_Blood_Male_LPS	1	0	THC	Rattus norvegicus	Blood peripheral blood mononucelar cells	Blood	Intraperitoneal injection
GSE273695_Blood_Male_Saline	1	0	THC	Rattus norvegicus	Blood peripheral blood mononucelar cells	Blood	Intraperitoneal injection
GSE273695_Brain_Female_LPS	1	0	THC	Rattus norvegicus	Brain orbitofrontal cortex	Brain	Intraperitoneal injection
GSE273695_Brain_Female_Saline	1	0	THC	Rattus norvegicus	Brain orbitofrontal cortex	Brain	Intraperitoneal injection
GSE274435_DMSO_4h	1	0	CBD	Rattus norvegicus	Brain primary hippocampal neurons	Brain	In medium
GSE274435_EtOH_4h	1	0	CBD	Rattus norvegicus	Brain primary hippocampal neurons	Brain	In medium
GSE274859_LPS_4h	1	0	CBD	Mus musculus	Brain Microglial cells	Brain	In medium
GSE275998_CDB10	1	0	CBD	Mus musculus	Kidney	Kidney	Intraperitoneal injection
GSE275998_CDB20	1	0	CBD	Mus musculus	Kidney	Kidney	Intraperitoneal injection
GSE57571	1	0	CBD	Homo sapiens	Sebaceous gland (SZ95 sebocyte)	Skin	In medium
GSE57823_Old	1	0	THC	Mus musculus	Brain hippocampus	Brain	Subcutaneous infusion
GSE57823_Young	1	0	THC	Mus musculus	Brain hippocampus	Brain	Subcutaneous infusion
GSE70689_THC_NoLPS	1	0	THC	Mus musculus	BV-2 microglial cell line	Immune	In medium
GSE70689_THC_wLPS	1	0	THC	Mus musculus	BV-2 microglial cell line	Immune	In medium
