# Supplementary material for: Comparative analysis of 105 datasets across species and tissues reveals higher variability in transcriptomic responses to THC than CBD
Source: Research Square preprint supplement (doi:10.21203/rs.3.rs-6857614/v1), 2025-06-13
Supplement: Supplementary file 17 [file e6200688e3889c4776ae9429.xlsx]

## Sheet: Up DEG
Name	Score
MTF1	0.0465116

## Sheet: Down DEG
Name	Score
SENP3	0.0498615
